# Supplementary material for: Ubiquitous Micro-Modular Homologies among Genomes from Viruses to Bacteria to Human Mitochondrial DNA: Platforms for Recombination during Evolution?
Source: MDPI journal article supplement (doi:10.3390/v14050885), 2022-04-24
Supplement: s1 [file s1]

## SARS-CoV-2 &amp; Autographa californica nucleopolyhedrovirus.apr

|                                                                                   |       |                                                                               |     |     |     |     |     |     |     |           |  |
|-----------------------------------------------------------------------------------|-------|-------------------------------------------------------------------------------|-----|-----|-----|-----|-----|-----|-----|-----------|--|
| Autographa californica nucleopolyhedrovirus NC 045512.2<br>SARS-CoV-2 NC_045512.2 | (1)   | 1                                                                             | 11  | 22  | 33  | 44  | 55  | 66  | 77  | Section 1 |  |
|                                                                                   | (1)   | GAATTCTACCCGTAAAGCGAGTTTAGTTTTGAAAAACAAATGACATCATTGTATAATGACATCATCCCCTGATTGT  |     |     |     |     |     |     |     |           |  |
|                                                                                   | (1)   | -----                                                                         |     |     |     |     |     |     |     |           |  |
| Autographa californica nucleopolyhedrovirus NC 045512.2<br>SARS-CoV-2 NC_045512.2 | (78)  | 78                                                                            | 88  | 99  | 110 | 121 | 132 | 143 | 154 | Section 2 |  |
|                                                                                   | (78)  | GTTTACAAGTAGAATTCTATCCGTAAAGCGAGTTCAGTTTTGAAAAACAAATGAGTCATACCTAAACACGTTAATAA |     |     |     |     |     |     |     |           |  |
|                                                                                   | (1)   | -----                                                                         |     |     |     |     |     |     |     |           |  |
| Autographa californica nucleopolyhedrovirus NC 045512.2<br>SARS-CoV-2 NC_045512.2 | (155) | 155                                                                           | 165 | 176 | 187 | 198 | 209 | 220 | 231 | Section 3 |  |
|                                                                                   | (155) | TCTTCTGATATCAGCTTATGACTCAAGTTATGAGCCGTGTGCAAAACATGAGATAAGTTTATGACATCATCCACTGA |     |     |     |     |     |     |     |           |  |
|                                                                                   | (1)   | -----                                                                         |     |     |     |     |     |     |     |           |  |
| Autographa californica nucleopolyhedrovirus NC 045512.2<br>SARS-CoV-2 NC_045512.2 | (232) | 232                                                                           | 242 | 253 | 264 | 275 | 286 | 297 | 308 | Section 4 |  |
|                                                                                   | (232) | TCGTGCGTTACAAGTAGAATTCTACTCGTAAAGCCAGTTCGGTTATGAGCCGTGTGCAAAACATGACATCAGCTTAT |     |     |     |     |     |     |     |           |  |
|                                                                                   | (1)   | -----                                                                         |     |     |     |     |     |     |     |           |  |
| Autographa californica nucleopolyhedrovirus NC 045512.2<br>SARS-CoV-2 NC_045512.2 | (309) | 309                                                                           | 319 | 330 | 341 | 352 | 363 | 374 | 385 | Section 5 |  |
|                                                                                   | (309) | GACTCATACTTGATTGTGTTTTACGCGTAGAATTCTACTCGTAAAGCGAGTTCGGTTATGAGCCGTGTGCAAAACAT |     |     |     |     |     |     |     |           |  |
|                                                                                   | (1)   | -----                                                                         |     |     |     |     |     |     |     |           |  |
| Autographa californica nucleopolyhedrovirus NC 045512.2<br>SARS-CoV-2 NC_045512.2 | (386) | 386                                                                           | 396 | 407 | 418 | 429 | 440 | 451 | 462 | Section 6 |  |
|                                                                                   | (386) | GACATCAGCTTATGAGTCATAATTAATCGTGCGTTACAAGTAGAATTCTACTCGTAAAGCGAGTTGAAGGATCATAT |     |     |     |     |     |     |     |           |  |
|                                                                                   | (1)   | -----                                                                         |     |     |     |     |     |     |     |           |  |
| Autographa californica nucleopolyhedrovirus NC 045512.2<br>SARS-CoV-2 NC_045512.2 | (463) | 463                                                                           | 473 | 484 | 495 | 506 | 517 | 528 | 539 | Section 7 |  |
|                                                                                   | (463) | TTAGTTGCGTTTATGAGATAAGATTGAAAGCACGTGTAAAATGTTTCCCGCGCGTTGGCACAACATTTACAATGCG  |     |     |     |     |     |     |     |           |  |
|                                                                                   | (1)   | -----                                                                         |     |     |     |     |     |     |     |           |  |

## SARS-CoV-2 &amp; Autographa californica nucleopolyhedrovirus.apr

|                                                     |        |                                                                               |      |      |      |      |      |      |      |
|-----------------------------------------------------|--------|-------------------------------------------------------------------------------|------|------|------|------|------|------|------|
|                                                     |        | Section 8                                                                     |      |      |      |      |      |      |      |
| Autographa californica nucleopolyhedrovirus NC 0... | (540)  | 540                                                                           | 550  | 561  | 572  | 583  | 594  | 605  | 616  |
|                                                     | (540)  | GCCAAGTTATAAAAGATTCTAATCTGATATGTTTTAAACACCTTTGCGGCCCGAGTTGTTTTCGTACGTGACTAGC  |      |      |      |      |      |      |      |
|                                                     | (1)    | -----                                                                         |      |      |      |      |      |      |      |
|                                                     |        | Section 9                                                                     |      |      |      |      |      |      |      |
| Autographa californica nucleopolyhedrovirus NC 0... | (617)  | 617                                                                           | 627  | 638  | 649  | 660  | 671  | 682  | 693  |
|                                                     | (617)  | GAAGAAGATGTGTGGACCGCAGAACAGATAGTAAACAAAACCTAGTATTGGAGCAATAATCGATTAAACCAACAC   |      |      |      |      |      |      |      |
|                                                     | (1)    | -----                                                                         |      |      |      |      |      |      |      |
|                                                     |        | Section 10                                                                    |      |      |      |      |      |      |      |
| Autographa californica nucleopolyhedrovirus NC 0... | (694)  | 694                                                                           | 704  | 715  | 726  | 737  | 748  | 759  | 770  |
|                                                     | (694)  | GTCTAAATATTATGATGGTGTGCATTTTTTTCGGGCGGGCCTGTTATACAAAAAATTCAAGTACCTGGCCAGACTT  |      |      |      |      |      |      |      |
|                                                     | (1)    | -----                                                                         |      |      |      |      |      |      |      |
|                                                     |        | Section 11                                                                    |      |      |      |      |      |      |      |
| Autographa californica nucleopolyhedrovirus NC 0... | (771)  | 771                                                                           | 781  | 792  | 803  | 814  | 825  | 836  | 847  |
|                                                     | (771)  | TGCCGCCTGAAAGCATAGTTCAAGAATTTATTGACACGGTAAAGAATTTACAGAAAAGTGTCCCGGCATGTTGGTG  |      |      |      |      |      |      |      |
|                                                     | (1)    | -----                                                                         |      |      |      |      |      |      |      |
|                                                     |        | Section 12                                                                    |      |      |      |      |      |      |      |
| Autographa californica nucleopolyhedrovirus NC 0... | (848)  | 848                                                                           | 858  | 869  | 880  | 891  | 902  | 913  | 924  |
|                                                     | (848)  | GGCGTGCACTGCACACACGGTATTAATCGCACCGGTTACATGGTGTGCAGATATTTAATGCACACCCTGGGTATTGC |      |      |      |      |      |      |      |
|                                                     | (1)    | -----                                                                         |      |      |      |      |      |      |      |
|                                                     |        | Section 13                                                                    |      |      |      |      |      |      |      |
| Autographa californica nucleopolyhedrovirus NC 0... | (925)  | 925                                                                           | 935  | 946  | 957  | 968  | 979  | 990  | 1001 |
|                                                     | (925)  | GCCGCAGGAAGCCATAGATAGATTGAAAAAGCCAGAGGTCACAAAATTGAAAGACAAAATTACGTTCAAGATTTAT  |      |      |      |      |      |      |      |
|                                                     | (1)    | -----                                                                         |      |      |      |      |      |      |      |
|                                                     |        | Section 14                                                                    |      |      |      |      |      |      |      |
| Autographa californica nucleopolyhedrovirus NC 0... | (1002) | 1002                                                                          | 1012 | 1023 | 1034 | 1045 | 1056 | 1067 | 1078 |
|                                                     | (1002) | TAATTTAATTAATATTATTTGCATTCTTTAACAAATACTTTATCCTATTTTCAAATTGTTGCGCTTCTTCCAGCGAA |      |      |      |      |      |      |      |
|                                                     | (1)    | -----                                                                         |      |      |      |      |      |      |      |

## SARS-CoV-2 &amp; Autographa californica nucleopolyhedrovirus.apr

|                                                     |        |                                                                                |      |      |      |      |      |      |      |
|-----------------------------------------------------|--------|--------------------------------------------------------------------------------|------|------|------|------|------|------|------|
|                                                     |        | Section 15                                                                     |      |      |      |      |      |      |      |
| Autographa californica nucleopolyhedrovirus NC 0... | (1079) | 1079                                                                           | 1089 | 1100 | 1111 | 1122 | 1133 | 1144 | 1155 |
|                                                     | (1079) | CCAAAACATATGCTTCGCTTGCTCCGTTTAGCTTGTAGCCGATCAGTGGCGTTGTTCCAATCGACGGTAGGATTAGGC |      |      |      |      |      |      |      |
|                                                     | (1)    | -----                                                                          |      |      |      |      |      |      |      |
|                                                     |        | Section 16                                                                     |      |      |      |      |      |      |      |
| Autographa californica nucleopolyhedrovirus NC 0... | (1156) | 1156                                                                           | 1166 | 1177 | 1188 | 1199 | 1210 | 1221 | 1232 |
|                                                     | (1156) | CGGATATTCTCCACCACAATGTTGGCAACGTTGATGTTACGTTTATGCTTTTGGTTTTCCACGTACGTCTTTTGGCC  |      |      |      |      |      |      |      |
|                                                     | (1)    | -----                                                                          |      |      |      |      |      |      |      |
|                                                     |        | Section 17                                                                     |      |      |      |      |      |      |      |
| Autographa californica nucleopolyhedrovirus NC 0... | (1233) | 1233                                                                           | 1243 | 1254 | 1265 | 1276 | 1287 | 1298 | 1309 |
|                                                     | (1233) | GGTAATAGCCGTAAACGTAGTGCCGTCGCGCGTCACGCACAACACCGGATGTTTGCGCTTGTCGCGGGGTATTGAA   |      |      |      |      |      |      |      |
|                                                     | (1)    | -----                                                                          |      |      |      |      |      |      |      |
|                                                     |        | Section 18                                                                     |      |      |      |      |      |      |      |
| Autographa californica nucleopolyhedrovirus NC 0... | (1310) | 1310                                                                           | 1320 | 1331 | 1342 | 1353 | 1364 | 1375 | 1386 |
|                                                     | (1310) | CCGCGCGATCCGACAAATCCACCACCTTTGGCAACTAAATCGGTGACCTGCGCGTCTTTTTTCTGCATTATTTCTCT  |      |      |      |      |      |      |      |
|                                                     | (1)    | -----                                                                          |      |      |      |      |      |      |      |
|                                                     |        | Section 19                                                                     |      |      |      |      |      |      |      |
| Autographa californica nucleopolyhedrovirus NC 0... | (1387) | 1387                                                                           | 1397 | 1408 | 1419 | 1430 | 1441 | 1452 | 1463 |
|                                                     | (1387) | TTCTTTTGCATGGTTTCCTGGAAGCCGGTGACATGCGGTTTAGATCAGTCATGACGCGCGTGACCTGCAAATCTTT   |      |      |      |      |      |      |      |
|                                                     | (1)    | -----                                                                          |      |      |      |      |      |      |      |
|                                                     |        | Section 20                                                                     |      |      |      |      |      |      |      |
| Autographa californica nucleopolyhedrovirus NC 0... | (1464) | 1464                                                                           | 1474 | 1485 | 1496 | 1507 | 1518 | 1529 | 1540 |
|                                                     | (1464) | GGCCTCGATCTGCTTGCTTGCTTGATGGCAACGATGCGTTCAATAAACTCTTGTTTTTAAACAAGTTCTCGGTTTTTT |      |      |      |      |      |      |      |
|                                                     | (1)    | -----                                                                          |      |      |      |      |      |      |      |
|                                                     |        | Section 21                                                                     |      |      |      |      |      |      |      |
| Autographa californica nucleopolyhedrovirus NC 0... | (1541) | 1541                                                                           | 1551 | 1562 | 1573 | 1584 | 1595 | 1606 | 1617 |
|                                                     | (1541) | GCGCCACCACCGCTTGACGCGGTTTGTGTGCTCGGTGAATGTCGCAATCAGCTTAGTCACCAACTGTTTGCTCTCC   |      |      |      |      |      |      |      |
|                                                     | (1)    | -----                                                                          |      |      |      |      |      |      |      |

## SARS-CoV-2 &amp; Autographa californica nucleopolyhedrovirus.apr

|                                                     |        |                                                                                |      |      |      |      |      |      |      |
|-----------------------------------------------------|--------|--------------------------------------------------------------------------------|------|------|------|------|------|------|------|
|                                                     |        | Section 22                                                                     |      |      |      |      |      |      |      |
| Autographa californica nucleopolyhedrovirus NC 0... | (1618) | 1618                                                                           | 1628 | 1639 | 1650 | 1661 | 1672 | 1683 | 1694 |
|                                                     | (1618) | TCCTCCCGTTGTTTGATCGCGGGATCGTACTTGCCGGTGCAGAGCACTTGAGGAATTACTTCTTCTAAAAGCCATTC  |      |      |      |      |      |      |      |
|                                                     | (1)    | -----                                                                          |      |      |      |      |      |      |      |
|                                                     |        | Section 23                                                                     |      |      |      |      |      |      |      |
| Autographa californica nucleopolyhedrovirus NC 0... | (1695) | 1695                                                                           | 1705 | 1716 | 1727 | 1738 | 1749 | 1760 | 1771 |
|                                                     | (1695) | TTGTAATTCTATGGCGTAAGGCAATTTGGACTTCATAATCAGCTGAATCACGCCGGATTAGTAATGAGCACTGTAT   |      |      |      |      |      |      |      |
|                                                     | (1)    | -----                                                                          |      |      |      |      |      |      |      |
|                                                     |        | Section 24                                                                     |      |      |      |      |      |      |      |
| Autographa californica nucleopolyhedrovirus NC 0... | (1772) | 1772                                                                           | 1782 | 1793 | 1804 | 1815 | 1826 | 1837 | 1848 |
|                                                     | (1772) | GCGGCTGCAAATACAGCGGGTCGCCCCCTTTTCACGACGCTGTTAGAGGTAGGGCCCCCATTTTGGATGGTCTGCTCA |      |      |      |      |      |      |      |
|                                                     | (1)    | -----                                                                          |      |      |      |      |      |      |      |
|                                                     |        | Section 25                                                                     |      |      |      |      |      |      |      |
| Autographa californica nucleopolyhedrovirus NC 0... | (1849) | 1849                                                                           | 1859 | 1870 | 1881 | 1892 | 1903 | 1914 | 1925 |
|                                                     | (1849) | AATAACGATTTGTATTTATTGTCTACATGAACACGTATAGCTTTATCACAACTGTATATTTAACTGTTAGCGAC     |      |      |      |      |      |      |      |
|                                                     | (1)    | -----                                                                          |      |      |      |      |      |      |      |
|                                                     |        | Section 26                                                                     |      |      |      |      |      |      |      |
| Autographa californica nucleopolyhedrovirus NC 0... | (1926) | 1926                                                                           | 1936 | 1947 | 1958 | 1969 | 1980 | 1991 | 2002 |
|                                                     | (1926) | GTCCTTGCCACGAACCGGACCTGTTGGTCGCGCTCTAGCACGTACCGCAGGTTGAACGTATCTTCTCCAAATTTAA   |      |      |      |      |      |      |      |
|                                                     | (1)    | -----                                                                          |      |      |      |      |      |      |      |
|                                                     |        | Section 27                                                                     |      |      |      |      |      |      |      |
| Autographa californica nucleopolyhedrovirus NC 0... | (2003) | 2003                                                                           | 2013 | 2024 | 2035 | 2046 | 2057 | 2068 | 2079 |
|                                                     | (2003) | ATTCTCCAATTTTAAACGCGAGCCATTTTGATACACGTGTGTCGATTTTGCAACAACATTGTTTTTTAAACGCAAACT |      |      |      |      |      |      |      |
|                                                     | (1)    | -----                                                                          |      |      |      |      |      |      |      |
|                                                     |        | Section 28                                                                     |      |      |      |      |      |      |      |
| Autographa californica nucleopolyhedrovirus NC 0... | (2080) | 2080                                                                           | 2090 | 2101 | 2112 | 2123 | 2134 | 2145 | 2156 |
|                                                     | (2080) | AAACTTATTGTGGTAAGCAATAATTAAATATGGGGGAACATGCGCCGCTACAACACTCGTCGTTATGAACGCAGACG  |      |      |      |      |      |      |      |
|                                                     | (1)    | -----                                                                          |      |      |      |      |      |      |      |

SARS-CoV-2 & Autographa californica nucleopolyhedrovirus.apr

|                                                     |        |                                                                               |                      |                      |                      |                      |                      |                      |                      |
|-----------------------------------------------------|--------|-------------------------------------------------------------------------------|----------------------|----------------------|----------------------|----------------------|----------------------|----------------------|----------------------|
|                                                     |        | Section 29                                                                    |                      |                      |                      |                      |                      |                      |                      |
| Autographa californica nucleopolyhedrovirus NC 0... | (2157) | <a href="#">2157</a>                                                          | <a href="#">2167</a> | <a href="#">2178</a> | <a href="#">2189</a> | <a href="#">2200</a> | <a href="#">2211</a> | <a href="#">2222</a> | <a href="#">2233</a> |
|                                                     | (2157) | GCGCCGGTCTCGGCGCAAGCGGCTAAAACGTGTTGCGCGTTCAACGCGGCAAACATCGCAAAAGCCAATAGTACAGT |                      |                      |                      |                      |                      |                      |                      |
|                                                     | (1)    | -----                                                                         |                      |                      |                      |                      |                      |                      |                      |
|                                                     |        | Section 30                                                                    |                      |                      |                      |                      |                      |                      |                      |
| Autographa californica nucleopolyhedrovirus NC 0... | (2234) | <a href="#">2234</a>                                                          | <a href="#">2244</a> | <a href="#">2255</a> | <a href="#">2266</a> | <a href="#">2277</a> | <a href="#">2288</a> | <a href="#">2299</a> | <a href="#">2310</a> |
|                                                     | (2234) | TTTGATTTGCATATTAACGCGCATTTTTTAAATTATCTTATTTAATAAATAGTTATGACGCCTACAACCTCCCGCCC |                      |                      |                      |                      |                      |                      |                      |
|                                                     | (1)    | -----                                                                         |                      |                      |                      |                      |                      |                      |                      |
|                                                     |        | Section 31                                                                    |                      |                      |                      |                      |                      |                      |                      |
| Autographa californica nucleopolyhedrovirus NC 0... | (2311) | <a href="#">2311</a>                                                          | <a href="#">2321</a> | <a href="#">2332</a> | <a href="#">2343</a> | <a href="#">2354</a> | <a href="#">2365</a> | <a href="#">2376</a> | <a href="#">2387</a> |
|                                                     | (2311) | GCGTTGACTCGCTGCACCTCGAGCAGTTCGTTGACGCCTTCTCCGTGTGGCCGAACACGTCGAGCGGGTGGTCGAT  |                      |                      |                      |                      |                      |                      |                      |
|                                                     | (1)    | -----                                                                         |                      |                      |                      |                      |                      |                      |                      |
|                                                     |        | Section 32                                                                    |                      |                      |                      |                      |                      |                      |                      |
| Autographa californica nucleopolyhedrovirus NC 0... | (2388) | <a href="#">2388</a>                                                          | <a href="#">2398</a> | <a href="#">2409</a> | <a href="#">2420</a> | <a href="#">2431</a> | <a href="#">2442</a> | <a href="#">2453</a> | <a href="#">2464</a> |
|                                                     | (2388) | GACCAGCGGCGTGCCGCACGCGACGCACAAGTATCTGTACACCGAATGATCGTCGGGCGAAGGCACGTCGGCCTCCA |                      |                      |                      |                      |                      |                      |                      |
|                                                     | (1)    | -----                                                                         |                      |                      |                      |                      |                      |                      |                      |
|                                                     |        | Section 33                                                                    |                      |                      |                      |                      |                      |                      |                      |
| Autographa californica nucleopolyhedrovirus NC 0... | (2465) | <a href="#">2465</a>                                                          | <a href="#">2475</a> | <a href="#">2486</a> | <a href="#">2497</a> | <a href="#">2508</a> | <a href="#">2519</a> | <a href="#">2530</a> | <a href="#">2541</a> |
|                                                     | (2465) | AGTGGCAATATTGGCAAATTCGAAAATATATACAGTTGGGTTGTTTGCGCATATCTATCGTGGCGTTGGGCATGTAC |                      |                      |                      |                      |                      |                      |                      |
|                                                     | (1)    | -----                                                                         |                      |                      |                      |                      |                      |                      |                      |
|                                                     |        | Section 34                                                                    |                      |                      |                      |                      |                      |                      |                      |
| Autographa californica nucleopolyhedrovirus NC 0... | (2542) | <a href="#">2542</a>                                                          | <a href="#">2552</a> | <a href="#">2563</a> | <a href="#">2574</a> | <a href="#">2585</a> | <a href="#">2596</a> | <a href="#">2607</a> | <a href="#">2618</a> |
|                                                     | (2542) | GTCCGAACGTTGATTTGCATGCAAGCCGAAATTAATCATTGCGATTAGTGCGATTAAACGTTGTACATCCTCGCT   |                      |                      |                      |                      |                      |                      |                      |
|                                                     | (1)    | -----                                                                         |                      |                      |                      |                      |                      |                      |                      |
|                                                     |        | Section 35                                                                    |                      |                      |                      |                      |                      |                      |                      |
| Autographa californica nucleopolyhedrovirus NC 0... | (2619) | <a href="#">2619</a>                                                          | <a href="#">2629</a> | <a href="#">2640</a> | <a href="#">2651</a> | <a href="#">2662</a> | <a href="#">2673</a> | <a href="#">2684</a> | <a href="#">2695</a> |
|                                                     | (2619) | TTTAATCATGCCGTCGATTAAATCGCGCAATCGAGTCAAGTGATCAAAGTGTTGAATAATGTTTTCTTTGTATTCCC |                      |                      |                      |                      |                      |                      |                      |
|                                                     | (1)    | -----                                                                         |                      |                      |                      |                      |                      |                      |                      |

## SARS-CoV-2 &amp; Autographa californica nucleopolyhedrovirus.apr

|                                                     |        |                                                                               |      |      |      |      |      |      |      |
|-----------------------------------------------------|--------|-------------------------------------------------------------------------------|------|------|------|------|------|------|------|
|                                                     |        | Section 36                                                                    |      |      |      |      |      |      |      |
| Autographa californica nucleopolyhedrovirus NC 0... | (2696) | 2696                                                                          | 2706 | 2717 | 2728 | 2739 | 2750 | 2761 | 2772 |
|                                                     | (2696) | GAGTCAAGCGCAGCGCGTATTTTAACTAGCCATCTTGTAAGTTAGTTTCATTTAATGCAACTTTATCCAATAA     |      |      |      |      |      |      |      |
|                                                     | (1)    | -----                                                                         |      |      |      |      |      |      |      |
|                                                     |        | Section 37                                                                    |      |      |      |      |      |      |      |
| Autographa californica nucleopolyhedrovirus NC 0... | (2773) | 2773                                                                          | 2783 | 2794 | 2805 | 2816 | 2827 | 2838 | 2849 |
|                                                     | (2773) | TATATTATGTATCGCACGTCAAGAATTAACAATGCGCCCGTTGTCGCATCTCAACACGACTATGATAGAGATCAAA  |      |      |      |      |      |      |      |
|                                                     | (1)    | -----                                                                         |      |      |      |      |      |      |      |
|                                                     |        | Section 38                                                                    |      |      |      |      |      |      |      |
| Autographa californica nucleopolyhedrovirus NC 0... | (2850) | 2850                                                                          | 2860 | 2871 | 2882 | 2893 | 2904 | 2915 | 2926 |
|                                                     | (2850) | AAAGCGCGAATTAAATAGCTTGCGACGCAACGTGCACGATCTGTGCACGCGTTCCGGCACGAGCTTTGATTGTAATA |      |      |      |      |      |      |      |
|                                                     | (1)    | -----                                                                         |      |      |      |      |      |      |      |
|                                                     |        | Section 39                                                                    |      |      |      |      |      |      |      |
| Autographa californica nucleopolyhedrovirus NC 0... | (2927) | 2927                                                                          | 2937 | 2948 | 2959 | 2970 | 2981 | 2992 | 3003 |
|                                                     | (2927) | AGTTTTTACGAAGCGATGACATGACCCCGTAGTGACAACGATCAGCCCCAAAAGAACTGCCGACTACAAAATTACC  |      |      |      |      |      |      |      |
|                                                     | (1)    | -----                                                                         |      |      |      |      |      |      |      |
|                                                     |        | Section 40                                                                    |      |      |      |      |      |      |      |
| Autographa californica nucleopolyhedrovirus NC 0... | (3004) | 3004                                                                          | 3014 | 3025 | 3036 | 3047 | 3058 | 3069 | 3080 |
|                                                     | (3004) | GAGTATGTCGGTGACGTTAACTATTAAGCCATCCAATCGACCGTTAGTCGAATCAGGACCGCTGGTGCGAGAAGC   |      |      |      |      |      |      |      |
|                                                     | (1)    | -----                                                                         |      |      |      |      |      |      |      |
|                                                     |        | Section 41                                                                    |      |      |      |      |      |      |      |
| Autographa californica nucleopolyhedrovirus NC 0... | (3081) | 3081                                                                          | 3091 | 3102 | 3113 | 3124 | 3135 | 3146 | 3157 |
|                                                     | (3081) | CGCGAAGTATGGCGAATGCATCGTATAACGTGTGGAGTCCGCTCATTAGAGCGTCATGTTTAGACAAGAAAGCTACA |      |      |      |      |      |      |      |
|                                                     | (1)    | -----                                                                         |      |      |      |      |      |      |      |
|                                                     |        | Section 42                                                                    |      |      |      |      |      |      |      |
| Autographa californica nucleopolyhedrovirus NC 0... | (3158) | 3158                                                                          | 3168 | 3179 | 3190 | 3201 | 3212 | 3223 | 3234 |
|                                                     | (3158) | TATTTAATTGATCCCGATGATTTTATTGATAAATTGACCCTAACTCCATACACGGTATTCTACAATGGCGGGGTTTT |      |      |      |      |      |      |      |
|                                                     | (1)    | -----                                                                         |      |      |      |      |      |      |      |

## SARS-CoV-2 &amp; Autographa californica nucleopolyhedrovirus.apr

|                                                     |        |                                                                                 |      |      |      |      |      |      |
|-----------------------------------------------------|--------|---------------------------------------------------------------------------------|------|------|------|------|------|------|
|                                                     |        | Section 43                                                                      |      |      |      |      |      |      |
| Autographa californica nucleopolyhedrovirus NC 0... | (3235) | 3235                                                                            | 3245 | 3256 | 3267 | 3278 | 3289 | 3300 |
|                                                     | (3235) | GGTCAAAATTTCCGGACTGCGATTGTACATGCTGTTAACGGCTCCGCCCACTATTAATGAAATTAAAAATTCCAATT   |      |      |      |      |      |      |
|                                                     | (1)    | -----                                                                           |      |      |      |      |      |      |
|                                                     |        | Section 44                                                                      |      |      |      |      |      |      |
| Autographa californica nucleopolyhedrovirus NC 0... | (3312) | 3312                                                                            | 3322 | 3333 | 3344 | 3355 | 3366 | 3377 |
|                                                     | (3312) | TTAAAAAACGCAGCAAGAGAAACATTTGTATGAAAGAATGCGTAGAAGGAAAGAAAAATGTCGTCGACATGCTGAAC   |      |      |      |      |      |      |
|                                                     | (1)    | -----                                                                           |      |      |      |      |      |      |
|                                                     |        | Section 45                                                                      |      |      |      |      |      |      |
| Autographa californica nucleopolyhedrovirus NC 0... | (3389) | 3389                                                                            | 3399 | 3410 | 3421 | 3432 | 3443 | 3454 |
|                                                     | (3389) | AACAAGATTAATATGCCTCCGTGTATAAAAAAATATTGAACGATTTGAAAGAAAACAATGTACCGCGCGCGGTAT     |      |      |      |      |      |      |
|                                                     | (1)    | -----                                                                           |      |      |      |      |      |      |
|                                                     |        | Section 46                                                                      |      |      |      |      |      |      |
| Autographa californica nucleopolyhedrovirus NC 0... | (3466) | 3466                                                                            | 3476 | 3487 | 3498 | 3509 | 3520 | 3531 |
|                                                     | (3466) | GTACAGGAAGAGGTTTATACTAAACTGTTACATTGCAAACGTGGTTTCGTGTGCCAAGTGTGAAAACCGATGTTTAA   |      |      |      |      |      |      |
|                                                     | (1)    | -----                                                                           |      |      |      |      |      |      |
|                                                     |        | Section 47                                                                      |      |      |      |      |      |      |
| Autographa californica nucleopolyhedrovirus NC 0... | (3543) | 3543                                                                            | 3553 | 3564 | 3575 | 3586 | 3597 | 3608 |
|                                                     | (3543) | TCAAGGCTCTGACGCATTTCTACAACCACGACTCCAAGTGTGTGGGTGAAGTCATGCATCTTTTAATCAAATCCCAA   |      |      |      |      |      |      |
|                                                     | (1)    | -----                                                                           |      |      |      |      |      |      |
|                                                     |        | Section 48                                                                      |      |      |      |      |      |      |
| Autographa californica nucleopolyhedrovirus NC 0... | (3620) | 3620                                                                            | 3630 | 3641 | 3652 | 3663 | 3674 | 3685 |
|                                                     | (3620) | GATGTGTATAAACCACCAAACCTGCCAAAAAATGAAAACCTGTCGACAAGCTCTGTCCGTTTGCTGGCAACTGCAAGGG |      |      |      |      |      |      |
|                                                     | (1)    | -----                                                                           |      |      |      |      |      |      |
|                                                     |        | Section 49                                                                      |      |      |      |      |      |      |
| Autographa californica nucleopolyhedrovirus NC 0... | (3697) | 3697                                                                            | 3707 | 3718 | 3729 | 3740 | 3751 | 3762 |
|                                                     | (3697) | TCTCAATCCTATTTGTAATTATTGAATAATAAAACAATTATAAATGCTAAATTTGTTTTTTATTAAACGATACAAACC  |      |      |      |      |      |      |
|                                                     | (1)    | -----                                                                           |      |      |      |      |      |      |

## SARS-CoV-2 &amp; Autographa californica nucleopolyhedrovirus.apr

|                                                     |        |                                                                               |      |      |      |      |      |      |      |
|-----------------------------------------------------|--------|-------------------------------------------------------------------------------|------|------|------|------|------|------|------|
|                                                     |        | Section 50                                                                    |      |      |      |      |      |      |      |
| Autographa californica nucleopolyhedrovirus NC 0... | (3774) | 3774                                                                          | 3784 | 3795 | 3806 | 3817 | 3828 | 3839 | 3850 |
|                                                     | (3774) | AAACGCAACAAGAACATTTGTAGTATTATCTATAATTGAAAACGCGTAGTTATAATCGCTGAGGTAATATTTAAAT  |      |      |      |      |      |      |      |
|                                                     | (1)    | -----                                                                         |      |      |      |      |      |      |      |
|                                                     |        | Section 51                                                                    |      |      |      |      |      |      |      |
| Autographa californica nucleopolyhedrovirus NC 0... | (3851) | 3851                                                                          | 3861 | 3872 | 3883 | 3894 | 3905 | 3916 | 3927 |
|                                                     | (3851) | CATTTTCAAATGATTCACAGTTAATTTGCGACAATATAATTTATTTTCACATAAACTAGACGCCTTGTCGTCTTCT  |      |      |      |      |      |      |      |
|                                                     | (1)    | -----                                                                         |      |      |      |      |      |      |      |
|                                                     |        | Section 52                                                                    |      |      |      |      |      |      |      |
| Autographa californica nucleopolyhedrovirus NC 0... | (3928) | 3928                                                                          | 3938 | 3949 | 3960 | 3971 | 3982 | 3993 | 4004 |
|                                                     | (3928) | TCTTCGTATTCCTTCTCTTTTTCATTTTCTCCTCATAAAAAATTAACATAGTTATTATCGTATCCATATATGTATCT |      |      |      |      |      |      |      |
|                                                     | (1)    | -----                                                                         |      |      |      |      |      |      |      |
|                                                     |        | Section 53                                                                    |      |      |      |      |      |      |      |
| Autographa californica nucleopolyhedrovirus NC 0... | (4005) | 4005                                                                          | 4015 | 4026 | 4037 | 4048 | 4059 | 4070 | 4081 |
|                                                     | (4005) | ATCGTATAGAGTAAATTTTTTGTGTCATAAATATATATGTCTTTTTTAATGGGGTGTATAGTACCGCTGCGCATAG  |      |      |      |      |      |      |      |
|                                                     | (1)    | -----                                                                         |      |      |      |      |      |      |      |
|                                                     |        | Section 54                                                                    |      |      |      |      |      |      |      |
| Autographa californica nucleopolyhedrovirus NC 0... | (4082) | 4082                                                                          | 4092 | 4103 | 4114 | 4125 | 4136 | 4147 | 4158 |
|                                                     | (4082) | TTTTTCTGTAATTTACAACAGTGCTATTTTCTGGTAGTTCTTCGGAGTGTTGCTTTAATTATTAAATTTATATAA   |      |      |      |      |      |      |      |
|                                                     | (1)    | -----                                                                         |      |      |      |      |      |      |      |
|                                                     |        | Section 55                                                                    |      |      |      |      |      |      |      |
| Autographa californica nucleopolyhedrovirus NC 0... | (4159) | 4159                                                                          | 4169 | 4180 | 4191 | 4202 | 4213 | 4224 | 4235 |
|                                                     | (4159) | TCAATGAATTTGGGATCGTCGGTTTTGTACAATATGTTGCCGGCATAGTACGCAGCTTCTTCTAGTTCAATTACACC |      |      |      |      |      |      |      |
|                                                     | (1)    | -----                                                                         |      |      |      |      |      |      |      |
|                                                     |        | Section 56                                                                    |      |      |      |      |      |      |      |
| Autographa californica nucleopolyhedrovirus NC 0... | (4236) | 4236                                                                          | 4246 | 4257 | 4268 | 4279 | 4290 | 4301 | 4312 |
|                                                     | (4236) | ATTTTTTAGCAGCACCGGATTAACATAACTTTCCAAAATGTTGTACGAACCGTTAAACAAAAACAGTTCACCTCCCT |      |      |      |      |      |      |      |
|                                                     | (1)    | -----                                                                         |      |      |      |      |      |      |      |



## SARS-CoV-2 &amp; Autographa californica nucleopolyhedrovirus.apr

|                                                     |        |                                                                                |      |      |      |      |      |      |      |
|-----------------------------------------------------|--------|--------------------------------------------------------------------------------|------|------|------|------|------|------|------|
|                                                     |        | Section 57                                                                     |      |      |      |      |      |      |      |
| Autographa californica nucleopolyhedrovirus NC 0... | (4313) | 4313                                                                           | 4323 | 4334 | 4345 | 4356 | 4367 | 4378 | 4389 |
|                                                     | (4313) | TTTCTATACTATTGTCTGCGAGCAGTTGTTTGTGTTAAAAATAACAGCCATTGTAATGAGACGCACAACTAATAT    |      |      |      |      |      |      |      |
|                                                     | (1)    | -----                                                                          |      |      |      |      |      |      |      |
|                                                     |        | Section 58                                                                     |      |      |      |      |      |      |      |
| Autographa californica nucleopolyhedrovirus NC 0... | (4390) | 4390                                                                           | 4400 | 4411 | 4422 | 4433 | 4444 | 4455 | 4466 |
|                                                     | (4390) | CACAAACTGGAAATGTCTATCAATATATAGTTGCTGATATCATGGAGATAATTAAAATGATAACCATCTCGCAAATA  |      |      |      |      |      |      |      |
|                                                     | (1)    | -----                                                                          |      |      |      |      |      |      |      |
|                                                     |        | Section 59                                                                     |      |      |      |      |      |      |      |
| Autographa californica nucleopolyhedrovirus NC 0... | (4467) | 4467                                                                           | 4477 | 4488 | 4499 | 4510 | 4521 | 4532 | 4543 |
|                                                     | (4467) | AATAAGTATTTTACTGTTTTTCGTAAACAGTTTTGTAATAAAAAACCTATAAATATGCCGGATTATTCATACCGTCCC |      |      |      |      |      |      |      |
|                                                     | (1)    | -----                                                                          |      |      |      |      |      |      |      |
|                                                     |        | Section 60                                                                     |      |      |      |      |      |      |      |
| Autographa californica nucleopolyhedrovirus NC 0... | (4544) | 4544                                                                           | 4554 | 4565 | 4576 | 4587 | 4598 | 4609 | 4620 |
|                                                     | (4544) | ACCATCGGGCGTACCTACGTGTACGACAACAAGTACTACAAAAATTTAGGTGCCGTTATCAAGAACGCTAAGCGCAA  |      |      |      |      |      |      |      |
|                                                     | (1)    | -----                                                                          |      |      |      |      |      |      |      |
|                                                     |        | Section 61                                                                     |      |      |      |      |      |      |      |
| Autographa californica nucleopolyhedrovirus NC 0... | (4621) | 4621                                                                           | 4631 | 4642 | 4653 | 4664 | 4675 | 4686 | 4697 |
|                                                     | (4621) | GAAGCACTTCGCCGAACATGAGATCGAAGAGGCTACCCTCGACCCCCTAGACAACCTACCTAGTGGCTGAGGATCCTT |      |      |      |      |      |      |      |
|                                                     | (1)    | -----                                                                          |      |      |      |      |      |      |      |
|                                                     |        | Section 62                                                                     |      |      |      |      |      |      |      |
| Autographa californica nucleopolyhedrovirus NC 0... | (4698) | 4698                                                                           | 4708 | 4719 | 4730 | 4741 | 4752 | 4763 | 4774 |
|                                                     | (4698) | TCCTGGGACCCGGCAAGAACCAAAACTCACTCTCTTCAAGGAAATCCGTAATGTTAAACCCGACACGATGAAGCTT   |      |      |      |      |      |      |      |
|                                                     | (1)    | -----                                                                          |      |      |      |      |      |      |      |
|                                                     |        | Section 63                                                                     |      |      |      |      |      |      |      |
| Autographa californica nucleopolyhedrovirus NC 0... | (4775) | 4775                                                                           | 4785 | 4796 | 4807 | 4818 | 4829 | 4840 | 4851 |
|                                                     | (4775) | GTCGTTGGATGGAAAGGAAAAGAGTTCTACAGGGAACTTGGACCCGCTTCATGGAAGACAGCTTCCCCATTGTTAA   |      |      |      |      |      |      |      |
|                                                     | (1)    | -----                                                                          |      |      |      |      |      |      |      |

## SARS-CoV-2 &amp; Autographa californica nucleopolyhedrovirus.apr

|                                                     |        |                                                                               |      |      |      |      |      |      |      |
|-----------------------------------------------------|--------|-------------------------------------------------------------------------------|------|------|------|------|------|------|------|
|                                                     |        | Section 64                                                                    |      |      |      |      |      |      |      |
| Autographa californica nucleopolyhedrovirus NC 0... | (4852) | 4852                                                                          | 4862 | 4873 | 4884 | 4895 | 4906 | 4917 | 4928 |
|                                                     | (4852) | CGACCAAGAAGTGATGGATGTTTTCTTGTGTCAACATGCGTCCCCTAGACCCAACCGTTGTTACAAATTCCTGG    |      |      |      |      |      |      |      |
|                                                     | (1)    | -----                                                                         |      |      |      |      |      |      |      |
|                                                     |        | Section 65                                                                    |      |      |      |      |      |      |      |
| Autographa californica nucleopolyhedrovirus NC 0... | (4929) | 4929                                                                          | 4939 | 4950 | 4961 | 4972 | 4983 | 4994 | 5005 |
|                                                     | (4929) | CCCAACACGCTCTGCGTTGCGACCCGACTATGTACCTCATGACGTGATTAGGATCGTCGAGCCTTCATGGGTGGGC  |      |      |      |      |      |      |      |
|                                                     | (1)    | -----                                                                         |      |      |      |      |      |      |      |
|                                                     |        | Section 66                                                                    |      |      |      |      |      |      |      |
| Autographa californica nucleopolyhedrovirus NC 0... | (5006) | 5006                                                                          | 5016 | 5027 | 5038 | 5049 | 5060 | 5071 | 5082 |
|                                                     | (5006) | AGCAACAACGAGTACCGCATCAGCCTGGCTAAGAAGGGCGCGGCTGCCCAATAATGAACCTTCACTCTGAGTACAC  |      |      |      |      |      |      |      |
|                                                     | (1)    | -----                                                                         |      |      |      |      |      |      |      |
|                                                     |        | Section 67                                                                    |      |      |      |      |      |      |      |
| Autographa californica nucleopolyhedrovirus NC 0... | (5083) | 5083                                                                          | 5093 | 5104 | 5115 | 5126 | 5137 | 5148 | 5159 |
|                                                     | (5083) | CAACTCGTTCGAACAGTTCATCGATCGTGTCTGTTGAGAACTTCTACAAGCCCATCGTTTACATCGGTACCGACT   |      |      |      |      |      |      |      |
|                                                     | (1)    | -----                                                                         |      |      |      |      |      |      |      |
|                                                     |        | Section 68                                                                    |      |      |      |      |      |      |      |
| Autographa californica nucleopolyhedrovirus NC 0... | (5160) | 5160                                                                          | 5170 | 5181 | 5192 | 5203 | 5214 | 5225 | 5236 |
|                                                     | (5160) | CTGCTGAAGAGGAGGAAATTCTCCTTGAAGTTTCCCTGGTGTCAAAGTAAAGGAGTTTGCACCAGACGCACCTCTG  |      |      |      |      |      |      |      |
|                                                     | (1)    | -----                                                                         |      |      |      |      |      |      |      |
|                                                     |        | Section 69                                                                    |      |      |      |      |      |      |      |
| Autographa californica nucleopolyhedrovirus NC 0... | (5237) | 5237                                                                          | 5247 | 5258 | 5269 | 5280 | 5291 | 5302 | 5313 |
|                                                     | (5237) | TTCCTGTTCCGGCGTATTAAACACGATACATTGTTATTAGTACATTTATTAAGCGCTAGATTCTGTGCGTTGTTG   |      |      |      |      |      |      |      |
|                                                     | (1)    | -----                                                                         |      |      |      |      |      |      |      |
|                                                     |        | Section 70                                                                    |      |      |      |      |      |      |      |
| Autographa californica nucleopolyhedrovirus NC 0... | (5314) | 5314                                                                          | 5324 | 5335 | 5346 | 5357 | 5368 | 5379 | 5390 |
|                                                     | (5314) | ATTTACAGACAATTGTTGTACGTATTTTAATAATTCATTAAATTTATAATCTTTAGGGTGGTATGTTAGAGCGAAAA |      |      |      |      |      |      |      |
|                                                     | (1)    | -----                                                                         |      |      |      |      |      |      |      |

## SARS-CoV-2 &amp; Autographa californica nucleopolyhedrovirus.apr

|                                                     |        |                                                                                 |      |      |      |      |      |      |
|-----------------------------------------------------|--------|---------------------------------------------------------------------------------|------|------|------|------|------|------|
|                                                     |        | Section 71                                                                      |      |      |      |      |      |      |
| Autographa californica nucleopolyhedrovirus NC 0... | (5391) | 5391                                                                            | 5401 | 5412 | 5423 | 5434 | 5445 | 5456 |
|                                                     | (5391) | TCAAATGATTTTCAGCGTCTTTATATCTGAATTTAAATATTAAATCCTCAATAGATTTGTAAAATAGGTTTCGATTA   |      |      |      |      |      |      |
|                                                     | (1)    | -----                                                                           |      |      |      |      |      |      |
|                                                     |        | Section 72                                                                      |      |      |      |      |      |      |
| Autographa californica nucleopolyhedrovirus NC 0... | (5468) | 5468                                                                            | 5478 | 5489 | 5500 | 5511 | 5522 | 5533 |
|                                                     | (5468) | GTTTCAAACAAGGGTTGTTTTCCGAACCGATGGCTGGACTATCTAATGGATTTTCGCTCAACGCCACAAACTTGC     |      |      |      |      |      |      |
|                                                     | (1)    | -----                                                                           |      |      |      |      |      |      |
|                                                     |        | Section 73                                                                      |      |      |      |      |      |      |
| Autographa californica nucleopolyhedrovirus NC 0... | (5545) | 5545                                                                            | 5555 | 5566 | 5577 | 5588 | 5599 | 5610 |
|                                                     | (5545) | CAAATCTTGTAGCAGCAATCTAGCTTTGTCGATATTCGTTTGTGTTTTGTTTGTAAATAAGGTTTCGACGTCGTTCA   |      |      |      |      |      |      |
|                                                     | (1)    | -----                                                                           |      |      |      |      |      |      |
|                                                     |        | Section 74                                                                      |      |      |      |      |      |      |
| Autographa californica nucleopolyhedrovirus NC 0... | (5622) | 5622                                                                            | 5632 | 5643 | 5654 | 5665 | 5676 | 5687 |
|                                                     | (5622) | AAATATTATGCGCTTTTGTATTTCTTCATCACTGTCGTTAGTGTACAATTGACTCGACGTAAACACGTTAAATAAA    |      |      |      |      |      |      |
|                                                     | (1)    | -----                                                                           |      |      |      |      |      |      |
|                                                     |        | Section 75                                                                      |      |      |      |      |      |      |
| Autographa californica nucleopolyhedrovirus NC 0... | (5699) | 5699                                                                            | 5709 | 5720 | 5731 | 5742 | 5753 | 5764 |
|                                                     | (5699) | GCTTGGACATATTTAACATCGGGCGTGTTAGCTTTATTAGGCCGATTATCGTCGTCGTCCTCAACCCCTCGTCGTTAGA |      |      |      |      |      |      |
|                                                     | (1)    | -----                                                                           |      |      |      |      |      |      |
|                                                     |        | Section 76                                                                      |      |      |      |      |      |      |
| Autographa californica nucleopolyhedrovirus NC 0... | (5776) | 5776                                                                            | 5786 | 5797 | 5808 | 5819 | 5830 | 5841 |
|                                                     | (5776) | AGTTGCTTCCGAAGACGATTTTGCCATAGCCACACGACGCCTATTAATTGTGTGCGGCTAACACGTCCGCGATCAAAAT |      |      |      |      |      |      |
|                                                     | (1)    | -----                                                                           |      |      |      |      |      |      |
|                                                     |        | Section 77                                                                      |      |      |      |      |      |      |
| Autographa californica nucleopolyhedrovirus NC 0... | (5853) | 5853                                                                            | 5863 | 5874 | 5885 | 5896 | 5907 | 5918 |
|                                                     | (5853) | TTGTAGTTGAGCTTTTGGGAATTATTTCTGATTGCGGGCGTTTTTGGGCGGGTTTCAATCTAACTGTGCCCGATTTT   |      |      |      |      |      |      |
|                                                     | (1)    | -----                                                                           |      |      |      |      |      |      |

## SARS-CoV-2 &amp; Autographa californica nucleopolyhedrovirus.apr

|                                                     |        |                                                                                 |      |      |      |      |      |      |      |
|-----------------------------------------------------|--------|---------------------------------------------------------------------------------|------|------|------|------|------|------|------|
|                                                     |        | Section 78                                                                      |      |      |      |      |      |      |      |
| Autographa californica nucleopolyhedrovirus NC 0... | (5930) | 5930                                                                            | 5940 | 5951 | 5962 | 5973 | 5984 | 5995 | 6006 |
|                                                     | (5930) | AATTCAGACAACACGTTAGAAAAGCGATGGTGCAGGCGGTGGTAACATTTTCAGACGGCAAATCTACTAATGGCGGCGG |      |      |      |      |      |      |      |
|                                                     | (1)    | -----                                                                           |      |      |      |      |      |      |      |
|                                                     |        | Section 79                                                                      |      |      |      |      |      |      |      |
| Autographa californica nucleopolyhedrovirus NC 0... | (6007) | 6007                                                                            | 6017 | 6028 | 6039 | 6050 | 6061 | 6072 | 6083 |
|                                                     | (6007) | TGGTGGAGCTGATGATAAATCTACCATCGGTGGAGGCGCAGGCGGGGCTGGCGGCGGAGGCGGAGGCGGAGGTGGTG   |      |      |      |      |      |      |      |
|                                                     | (1)    | -----                                                                           |      |      |      |      |      |      |      |
|                                                     |        | Section 80                                                                      |      |      |      |      |      |      |      |
| Autographa californica nucleopolyhedrovirus NC 0... | (6084) | 6084                                                                            | 6094 | 6105 | 6116 | 6127 | 6138 | 6149 | 6160 |
|                                                     | (6084) | GCGGTGATGCAGACGGCGGTTTAGGCTCAAATGTCTCTTTAGGCAACACAGTCGGCACCTCAACTATTGTACTGGTT   |      |      |      |      |      |      |      |
|                                                     | (1)    | -----                                                                           |      |      |      |      |      |      |      |
|                                                     |        | Section 81                                                                      |      |      |      |      |      |      |      |
| Autographa californica nucleopolyhedrovirus NC 0... | (6161) | 6161                                                                            | 6171 | 6182 | 6193 | 6204 | 6215 | 6226 | 6237 |
|                                                     | (6161) | TCGGGCGCCGTTTTTGGTTTGACCGGTCTGAGACGAGTGCATTTTTTTTCGTTTCTAATAGCTTCCAACAATTGTTG   |      |      |      |      |      |      |      |
|                                                     | (1)    | -----                                                                           |      |      |      |      |      |      |      |
|                                                     |        | Section 82                                                                      |      |      |      |      |      |      |      |
| Autographa californica nucleopolyhedrovirus NC 0... | (6238) | 6238                                                                            | 6248 | 6259 | 6270 | 6281 | 6292 | 6303 | 6314 |
|                                                     | (6238) | TCTGTCGTCTAAAGGTGCAGCGGGTTGAGGTTCCGTCGGCATTGGTGGAGCGGGCGGCAATTCAGACATCGATGGTG   |      |      |      |      |      |      |      |
|                                                     | (1)    | -----                                                                           |      |      |      |      |      |      |      |
|                                                     |        | Section 83                                                                      |      |      |      |      |      |      |      |
| Autographa californica nucleopolyhedrovirus NC 0... | (6315) | 6315                                                                            | 6325 | 6336 | 6347 | 6358 | 6369 | 6380 | 6391 |
|                                                     | (6315) | GTGGTGGTGGTGGAGGCGCTGGAATGTTAGGCACGGGAGAAAGGTGGTGGCGGCGGTGCCGCCGTATAATTTGTTCT   |      |      |      |      |      |      |      |
|                                                     | (1)    | -----                                                                           |      |      |      |      |      |      |      |
|                                                     |        | Section 84                                                                      |      |      |      |      |      |      |      |
| Autographa californica nucleopolyhedrovirus NC 0... | (6392) | 6392                                                                            | 6402 | 6413 | 6424 | 6435 | 6446 | 6457 | 6468 |
|                                                     | (6392) | GGTTTAGTTTGTTCGCGCACGATTGTGGGCACCGGCGCAGGCGCCGCTGGCTGCACAACGGAAGGTCGTCTGCTTCG   |      |      |      |      |      |      |      |
|                                                     | (1)    | -----                                                                           |      |      |      |      |      |      |      |

## SARS-CoV-2 &amp; Autographa californica nucleopolyhedrovirus.apr

|                                                     |        |                                                                                 |      |      |      |      |      |      |      |
|-----------------------------------------------------|--------|---------------------------------------------------------------------------------|------|------|------|------|------|------|------|
|                                                     |        | Section 85                                                                      |      |      |      |      |      |      |      |
| Autographa californica nucleopolyhedrovirus NC 0... | (6469) | 6469                                                                            | 6479 | 6490 | 6501 | 6512 | 6523 | 6534 | 6545 |
|                                                     | (6469) | AGGCAGCGCTTGGGGTGGTGGCAATTCAATATTATAATTGGAATACAAATCGTAAAAATCTGCTATAAGCATTGTAA   |      |      |      |      |      |      |      |
|                                                     | (1)    | -----                                                                           |      |      |      |      |      |      |      |
|                                                     |        | Section 86                                                                      |      |      |      |      |      |      |      |
| Autographa californica nucleopolyhedrovirus NC 0... | (6546) | 6546                                                                            | 6556 | 6567 | 6578 | 6589 | 6600 | 6611 | 6622 |
|                                                     | (6546) | TTTCGCTATCGTTTACCGTGCCGATATTTAACAACCGCTCAATGTAAGCAATTGTATTGTAAAGAGATTGTCTCAAG   |      |      |      |      |      |      |      |
|                                                     | (1)    | -----                                                                           |      |      |      |      |      |      |      |
|                                                     |        | Section 87                                                                      |      |      |      |      |      |      |      |
| Autographa californica nucleopolyhedrovirus NC 0... | (6623) | 6623                                                                            | 6633 | 6644 | 6655 | 6666 | 6677 | 6688 | 6699 |
|                                                     | (6623) | CTCGGATCCCGCAGCCGATAACAAGCCTTTTCATTTTTACTACAGCATTGTAGTGGCGAGACACTTCGCTGTCGTC    |      |      |      |      |      |      |      |
|                                                     | (1)    | -----                                                                           |      |      |      |      |      |      |      |
|                                                     |        | Section 88                                                                      |      |      |      |      |      |      |      |
| Autographa californica nucleopolyhedrovirus NC 0... | (6700) | 6700                                                                            | 6710 | 6721 | 6732 | 6743 | 6754 | 6765 | 6776 |
|                                                     | (6700) | GACGTACATGTATGCTTTGTTGTCAAAAACGTCGTTGGCAAGCTTTAAATATTTAAAGAACATCTCTGTTCAAGCA    |      |      |      |      |      |      |      |
|                                                     | (1)    | -----                                                                           |      |      |      |      |      |      |      |
|                                                     |        | Section 89                                                                      |      |      |      |      |      |      |      |
| Autographa californica nucleopolyhedrovirus NC 0... | (6777) | 6777                                                                            | 6787 | 6798 | 6809 | 6820 | 6831 | 6842 | 6853 |
|                                                     | (6777) | CCACTGTGTTGTCGTAAATGTTGTTTTTGATAATTTGCGCTTCCGCAGTATCGACACGTTCAAAAATTGATGCGCA    |      |      |      |      |      |      |      |
|                                                     | (1)    | -----                                                                           |      |      |      |      |      |      |      |
|                                                     |        | Section 90                                                                      |      |      |      |      |      |      |      |
| Autographa californica nucleopolyhedrovirus NC 0... | (6854) | 6854                                                                            | 6864 | 6875 | 6886 | 6897 | 6908 | 6919 | 6930 |
|                                                     | (6854) | TCAATTTTGTGTTTCCCTATTATTGAATAAATAAGATTGTACAGATTCATATCTACGATTTCGTCATGGCCACCACAAA |      |      |      |      |      |      |      |
|                                                     | (1)    | -----                                                                           |      |      |      |      |      |      |      |
|                                                     |        | Section 91                                                                      |      |      |      |      |      |      |      |
| Autographa californica nucleopolyhedrovirus NC 0... | (6931) | 6931                                                                            | 6941 | 6952 | 6963 | 6974 | 6985 | 6996 | 7007 |
|                                                     | (6931) | TGCTACGCTGCAAACGCTGGTACAATTTTACGAAAACGTCAAAACGTCGATATAAATAATCAACGGGC            |      |      |      |      |      |      |      |
|                                                     | (1)    | -----                                                                           |      |      |      |      |      |      |      |

## SARS-CoV-2 &amp; Autographa californica nucleopolyhedrovirus.apr

|                                                     |        |                                                                                |      |      |      |      |      |      |      |
|-----------------------------------------------------|--------|--------------------------------------------------------------------------------|------|------|------|------|------|------|------|
|                                                     |        | Section 92                                                                     |      |      |      |      |      |      |      |
| Autographa californica nucleopolyhedrovirus NC 0... | (7008) | 7008                                                                           | 7018 | 7029 | 7040 | 7051 | 7062 | 7073 | 7084 |
|                                                     | (7008) | GCTTTGGCAAAATATCTATTTTATCGCACAAAGCCCACTAGCAAATTGTATTTGCAGAAAACAATTCGGCGCACAAAT |      |      |      |      |      |      |      |
|                                                     | (1)    | -----                                                                          |      |      |      |      |      |      |      |
|                                                     |        | Section 93                                                                     |      |      |      |      |      |      |      |
| Autographa californica nucleopolyhedrovirus NC 0... | (7085) | 7085                                                                           | 7095 | 7106 | 7117 | 7128 | 7139 | 7150 | 7161 |
|                                                     | (7085) | TTTAACGCTGACGAAATAAAAGTTCACCAGTTAATGAGCGACCACCCAAATTTTATAAAAATCTATTTTAATCACGG  |      |      |      |      |      |      |      |
|                                                     | (1)    | -----                                                                          |      |      |      |      |      |      |      |
|                                                     |        | Section 94                                                                     |      |      |      |      |      |      |      |
| Autographa californica nucleopolyhedrovirus NC 0... | (7162) | 7162                                                                           | 7172 | 7183 | 7194 | 7205 | 7216 | 7227 | 7238 |
|                                                     | (7162) | TTCCATCAACAACCAAGTGATCGTGATGGACTACATTGACTGTCCCGATTTATTTGAAACACTACAAATTAAAGGCG  |      |      |      |      |      |      |      |
|                                                     | (1)    | -----                                                                          |      |      |      |      |      |      |      |
|                                                     |        | Section 95                                                                     |      |      |      |      |      |      |      |
| Autographa californica nucleopolyhedrovirus NC 0... | (7239) | 7239                                                                           | 7249 | 7260 | 7271 | 7282 | 7293 | 7304 | 7315 |
|                                                     | (7239) | AGCTTTCGTACCAACTTGTTAGCAATATTATTAGACAGCTGTGTGAAGCGCTCAACGATTTGCACAAGCACAAATTC  |      |      |      |      |      |      |      |
|                                                     | (1)    | -----                                                                          |      |      |      |      |      |      |      |
|                                                     |        | Section 96                                                                     |      |      |      |      |      |      |      |
| Autographa californica nucleopolyhedrovirus NC 0... | (7316) | 7316                                                                           | 7326 | 7337 | 7348 | 7359 | 7370 | 7381 | 7392 |
|                                                     | (7316) | ATACACAACGACATAAAACTCGAAAATGTCTTATATTTCGAAGCACTTGATCGCGTGTATGTTTGCATTACGGATT   |      |      |      |      |      |      |      |
|                                                     | (1)    | -----                                                                          |      |      |      |      |      |      |      |
|                                                     |        | Section 97                                                                     |      |      |      |      |      |      |      |
| Autographa californica nucleopolyhedrovirus NC 0... | (7393) | 7393                                                                           | 7403 | 7414 | 7425 | 7436 | 7447 | 7458 | 7469 |
|                                                     | (7393) | GTGCAAAACAGAAAACCTCACTTAGCGTGACGACGGCACGTTGGAGTATTTTAGTCCGGAATAATTCGACACACAA   |      |      |      |      |      |      |      |
|                                                     | (1)    | -----                                                                          |      |      |      |      |      |      |      |
|                                                     |        | Section 98                                                                     |      |      |      |      |      |      |      |
| Autographa californica nucleopolyhedrovirus NC 0... | (7470) | 7470                                                                           | 7480 | 7491 | 7502 | 7513 | 7524 | 7535 | 7546 |
|                                                     | (7470) | CTATGCACGTTTCGTTTGACTGGTACGCCGTCGGCGTGTTAACATACAAGTTGCTAACCGGCGGCCGACACCCATTT  |      |      |      |      |      |      |      |
|                                                     | (1)    | -----                                                                          |      |      |      |      |      |      |      |

## SARS-CoV-2 &amp; Autographa californica nucleopolyhedrovirus.apr

|                                                     |        |                                                                                |      |      |      |      |      |      |      |
|-----------------------------------------------------|--------|--------------------------------------------------------------------------------|------|------|------|------|------|------|------|
|                                                     |        | Section 99                                                                     |      |      |      |      |      |      |      |
| Autographa californica nucleopolyhedrovirus NC 0... | (7547) | 7547                                                                           | 7557 | 7568 | 7579 | 7590 | 7601 | 7612 | 7623 |
|                                                     | (7547) | GAAAAAAGCGAAGACGAAATGTTGGACTTGAATAGCATGAAGCGTCGTCAGCAATACAATGACATTGGCGTTTTTAA  |      |      |      |      |      |      |      |
|                                                     | (1)    | -----                                                                          |      |      |      |      |      |      |      |
|                                                     |        | Section 100                                                                    |      |      |      |      |      |      |      |
| Autographa californica nucleopolyhedrovirus NC 0... | (7624) | 7624                                                                           | 7634 | 7645 | 7656 | 7667 | 7678 | 7689 | 7700 |
|                                                     | (7624) | ACACGTTTCGTAACGTTAACGCTCGTGACTTTGTGTACTGCCTAACAAGATACAACATAGATTGTAGACTCACAAATT |      |      |      |      |      |      |      |
|                                                     | (1)    | -----                                                                          |      |      |      |      |      |      |      |
|                                                     |        | Section 101                                                                    |      |      |      |      |      |      |      |
| Autographa californica nucleopolyhedrovirus NC 0... | (7701) | 7701                                                                           | 7711 | 7722 | 7733 | 7744 | 7755 | 7766 | 7777 |
|                                                     | (7701) | ACAAACAAATTATAAAACATGAGTTTTTGTCTGTAATAATGCCACTTGTTTTACGAGTAGAATTCTACGTGTAACACA |      |      |      |      |      |      |      |
|                                                     | (1)    | -----                                                                          |      |      |      |      |      |      |      |
|                                                     |        | Section 102                                                                    |      |      |      |      |      |      |      |
| Autographa californica nucleopolyhedrovirus NC 0... | (7778) | 7778                                                                           | 7788 | 7799 | 7810 | 7821 | 7832 | 7843 | 7854 |
|                                                     | (7778) | CGATCTAAAAGATGATGTCATTTTTTATCAATGACTCATTTGTTTTAAACAGACTTGTTTTACGAGTAGAATTCTA   |      |      |      |      |      |      |      |
|                                                     | (1)    | -----                                                                          |      |      |      |      |      |      |      |
|                                                     |        | Section 103                                                                    |      |      |      |      |      |      |      |
| Autographa californica nucleopolyhedrovirus NC 0... | (7855) | 7855                                                                           | 7865 | 7876 | 7887 | 7898 | 7909 | 7920 | 7931 |
|                                                     | (7855) | CGTGTAAGCATGATCGTGAGTGGTGTTAATAAATCATAAAATTATTGTAAATGTTTATTATTTAAAAACGATTC     |      |      |      |      |      |      |      |
|                                                     | (1)    | -----                                                                          |      |      |      |      |      |      |      |
|                                                     |        | Section 104                                                                    |      |      |      |      |      |      |      |
| Autographa californica nucleopolyhedrovirus NC 0... | (7932) | 7932                                                                           | 7942 | 7953 | 7964 | 7975 | 7986 | 7997 | 8008 |
|                                                     | (7932) | AAATATATAATAAAAAACAATCTACATCTATTTCTTCACAATCCATAACACACAACAGGTCCATCAATGAGTTTTTGT |      |      |      |      |      |      |      |
|                                                     | (1)    | -----                                                                          |      |      |      |      |      |      |      |
|                                                     |        | Section 105                                                                    |      |      |      |      |      |      |      |
| Autographa californica nucleopolyhedrovirus NC 0... | (8009) | 8009                                                                           | 8019 | 8030 | 8041 | 8052 | 8063 | 8074 | 8085 |
|                                                     | (8009) | CTTTATCCGACATACTATGTGCATGTAACAAATCAAATACATCTTTTAAATTTTATACACATCTTTACATTGTCTA   |      |      |      |      |      |      |      |
|                                                     | (1)    | -----                                                                          |      |      |      |      |      |      |      |

## SARS-CoV-2 &amp; Autographa californica nucleopolyhedrovirus.apr

|                                                     |        |                                                                                |      |      |      |      |      |      |      |
|-----------------------------------------------------|--------|--------------------------------------------------------------------------------|------|------|------|------|------|------|------|
|                                                     |        | Section 106                                                                    |      |      |      |      |      |      |      |
| Autographa californica nucleopolyhedrovirus NC 0... | (8086) | 8086                                                                           | 8096 | 8107 | 8118 | 8129 | 8140 | 8151 | 8162 |
|                                                     | (8086) | CCAAAATCTTTAATAACCCTATAACAAGGAAAAGACTTTTCTTCTTGCGTGGTTTTGCCGCGCAGATATTGAAATAA  |      |      |      |      |      |      |      |
|                                                     | (1)    | -----                                                                          |      |      |      |      |      |      |      |
|                                                     |        | Section 107                                                                    |      |      |      |      |      |      |      |
| Autographa californica nucleopolyhedrovirus NC 0... | (8163) | 8163                                                                           | 8173 | 8184 | 8195 | 8206 | 8217 | 8228 | 8239 |
|                                                     | (8163) | AATGTGCATGCACGACAACCTTGTGTTTACTAAAATGCTCCTTGCTTATACCGCAAACCGGCCATACATTTTCGGCGA |      |      |      |      |      |      |      |
|                                                     | (1)    | -----                                                                          |      |      |      |      |      |      |      |
|                                                     |        | Section 108                                                                    |      |      |      |      |      |      |      |
| Autographa californica nucleopolyhedrovirus NC 0... | (8240) | 8240                                                                           | 8250 | 8261 | 8272 | 8283 | 8294 | 8305 | 8316 |
|                                                     | (8240) | TTACACGCGGACAATTGTACGATTCTGTCTACGTGTAAACGATCATCATAATCACTCTTGCGCAAACGAATAAATTTT |      |      |      |      |      |      |      |
|                                                     | (1)    | -----                                                                          |      |      |      |      |      |      |      |
|                                                     |        | Section 109                                                                    |      |      |      |      |      |      |      |
| Autographa californica nucleopolyhedrovirus NC 0... | (8317) | 8317                                                                           | 8327 | 8338 | 8349 | 8360 | 8371 | 8382 | 8393 |
|                                                     | (8317) | TTCACCGCTTCCGACAAACGAGGCACCAATTCGGCGGGCAGCTTCGATACATTATTCTGTGCACATAAGTTACCAC   |      |      |      |      |      |      |      |
|                                                     | (1)    | -----                                                                          |      |      |      |      |      |      |      |
|                                                     |        | Section 110                                                                    |      |      |      |      |      |      |      |
| Autographa californica nucleopolyhedrovirus NC 0... | (8394) | 8394                                                                           | 8404 | 8415 | 8426 | 8437 | 8448 | 8459 | 8470 |
|                                                     | (8394) | ACAAAATTTATTGTACCACCATCCGACAACGTCGTTATTAGGGTTGAACACGTTGGCGATGCGCAGCAGTTTCCCGT  |      |      |      |      |      |      |      |
|                                                     | (1)    | -----                                                                          |      |      |      |      |      |      |      |
|                                                     |        | Section 111                                                                    |      |      |      |      |      |      |      |
| Autographa californica nucleopolyhedrovirus NC 0... | (8471) | 8471                                                                           | 8481 | 8492 | 8503 | 8514 | 8525 | 8536 | 8547 |
|                                                     | (8471) | TTCTCATGAAATATTCAAAGCGGCCCAAAATAATTTGCAAGCAATCCAACATGTCTTGAGAAATTTCTCGTTCAAAA  |      |      |      |      |      |      |      |
|                                                     | (1)    | -----                                                                          |      |      |      |      |      |      |      |
|                                                     |        | Section 112                                                                    |      |      |      |      |      |      |      |
| Autographa californica nucleopolyhedrovirus NC 0... | (8548) | 8548                                                                           | 8558 | 8569 | 8580 | 8591 | 8602 | 8613 | 8624 |
|                                                     | (8548) | TTGTTCAAAGAGAATATCTGCCATCCGTTTTGAACGCGCACGCTGACGGGAACACCGCATCGATTTGCTCCAACAC   |      |      |      |      |      |      |      |
|                                                     | (1)    | -----                                                                          |      |      |      |      |      |      |      |



## SARS-CoV-2 &amp; Autographa californica nucleopolyhedrovirus.apr

|                                                     |        |                                                                                |      |      |      |      |      |      |      |
|-----------------------------------------------------|--------|--------------------------------------------------------------------------------|------|------|------|------|------|------|------|
|                                                     |        | Section 113                                                                    |      |      |      |      |      |      |      |
| Autographa californica nucleopolyhedrovirus NC 0... | (8625) | 8625                                                                           | 8635 | 8646 | 8657 | 8668 | 8679 | 8690 | 8701 |
|                                                     | (8625) | TTCACGGACGTTATCGTCGATGCCCATCGTTTCGCTGGTGCTGAACCAATGGGAAAGGCTCTTGATGGAATCGCCCG  |      |      |      |      |      |      |      |
|                                                     | (1)    | -----                                                                          |      |      |      |      |      |      |      |
|                                                     |        | Section 114                                                                    |      |      |      |      |      |      |      |
| Autographa californica nucleopolyhedrovirus NC 0... | (8702) | 8702                                                                           | 8712 | 8723 | 8734 | 8745 | 8756 | 8767 | 8778 |
|                                                     | (8702) | CGTCTATCATCTTGACCGCTTCGTCAAAGGTGCAACTGCCGCTCTTCAAACGCCGCATAGCGGTACGTCCCGCTCT   |      |      |      |      |      |      |      |
|                                                     | (1)    | -----                                                                          |      |      |      |      |      |      |      |
|                                                     |        | Section 115                                                                    |      |      |      |      |      |      |      |
| Autographa californica nucleopolyhedrovirus NC 0... | (8779) | 8779                                                                           | 8789 | 8800 | 8811 | 8822 | 8833 | 8844 | 8855 |
|                                                     | (8779) | ATGCACGACATACCGTTTACGTACGATTCTGATAGGTATTCCTGAACTATACGGTAATGGTGATACGACTCGCCATA  |      |      |      |      |      |      |      |
|                                                     | (1)    | -----                                                                          |      |      |      |      |      |      |      |
|                                                     |        | Section 116                                                                    |      |      |      |      |      |      |      |
| Autographa californica nucleopolyhedrovirus NC 0... | (8856) | 8856                                                                           | 8866 | 8877 | 8888 | 8899 | 8910 | 8921 | 8932 |
|                                                     | (8856) | CACGTCGTGCACCTCATTGTATTTAGCATAATAATTGTAAATTATTAACCTTTCAGCGAGAGACATGTTGTTCAGTAA |      |      |      |      |      |      |      |
|                                                     | (1)    | -----                                                                          |      |      |      |      |      |      |      |
|                                                     |        | Section 117                                                                    |      |      |      |      |      |      |      |
| Autographa californica nucleopolyhedrovirus NC 0... | (8933) | 8933                                                                           | 8943 | 8954 | 8965 | 8976 | 8987 | 8998 | 9009 |
|                                                     | (8933) | AGCGGTGCTAGGCTCAATAATACTGATGTACAGGCACGCGTGCTATTTATATATAATTTGCAAGGAGGGGAGCTGT   |      |      |      |      |      |      |      |
|                                                     | (1)    | -----                                                                          |      |      |      |      |      |      |      |
|                                                     |        | Section 118                                                                    |      |      |      |      |      |      |      |
| Autographa californica nucleopolyhedrovirus NC 0... | (9010) | 9010                                                                           | 9020 | 9031 | 9042 | 9053 | 9064 | 9075 | 9086 |
|                                                     | (9010) | TATCGGTTGCTATTATTAAAGAATGGCCGTCTGTTTTATCACAAAGCTTGGCAGCCTCAACCATGAAGCGTCGTCAT  |      |      |      |      |      |      |      |
|                                                     | (1)    | -----                                                                          |      |      |      |      |      |      |      |
|                                                     |        | Section 119                                                                    |      |      |      |      |      |      |      |
| Autographa californica nucleopolyhedrovirus NC 0... | (9087) | 9087                                                                           | 9097 | 9108 | 9119 | 9130 | 9141 | 9152 | 9163 |
|                                                     | (9087) | TGTAATTAATTTCTCTGCCTCAAGAATTATTTGACAAGATTGTCGAGTATTTATCTTTATCTGATTACTGCAATTT   |      |      |      |      |      |      |      |
|                                                     | (1)    | -----                                                                          |      |      |      |      |      |      |      |

## SARS-CoV-2 &amp; Autographa californica nucleopolyhedrovirus.apr

|                                                     |        |                                                                                |      |      |      |      |      |      |      |
|-----------------------------------------------------|--------|--------------------------------------------------------------------------------|------|------|------|------|------|------|------|
|                                                     |        | Section 120                                                                    |      |      |      |      |      |      |      |
| Autographa californica nucleopolyhedrovirus NC 0... | (9164) | 9164                                                                           | 9174 | 9185 | 9196 | 9207 | 9218 | 9229 | 9240 |
|                                                     | (9164) | GGTGCTTGTCTGTAAAAGACCTTCTAGTAAATATAACGTGATATTTGATAGTACTAATCACCAACATTTGAAAGGCG  |      |      |      |      |      |      |      |
|                                                     | (1)    | -----                                                                          |      |      |      |      |      |      |      |
|                                                     |        | Section 121                                                                    |      |      |      |      |      |      |      |
| Autographa californica nucleopolyhedrovirus NC 0... | (9241) | 9241                                                                           | 9251 | 9262 | 9273 | 9284 | 9295 | 9306 | 9317 |
|                                                     | (9241) | TGTACAAAAAGACAGACGTGCAAATAACAAGCTACAACGAATACATCAACTGTATTTGCAACGAAGTGAAGACAAGAC |      |      |      |      |      |      |      |
|                                                     | (1)    | -----                                                                          |      |      |      |      |      |      |      |
|                                                     |        | Section 122                                                                    |      |      |      |      |      |      |      |
| Autographa californica nucleopolyhedrovirus NC 0... | (9318) | 9318                                                                           | 9328 | 9339 | 9350 | 9361 | 9372 | 9383 | 9394 |
|                                                     | (9318) | GAATTCTATGCCAAATCATCATGGATTGCGAGTATTTGCGGTCACCAGAGAGCGACAATTTTTAGTGTAACAAATAA  |      |      |      |      |      |      |      |
|                                                     | (1)    | -----                                                                          |      |      |      |      |      |      |      |
|                                                     |        | Section 123                                                                    |      |      |      |      |      |      |      |
| Autographa californica nucleopolyhedrovirus NC 0... | (9395) | 9395                                                                           | 9405 | 9416 | 9427 | 9438 | 9449 | 9460 | 9471 |
|                                                     | (9395) | ACAAGTAGAAATGAAATATCATTGTATAATATAGCAATTGTGGAAAGTGAAGATTGCAACGGATTTTACCCATTG    |      |      |      |      |      |      |      |
|                                                     | (1)    | -----                                                                          |      |      |      |      |      |      |      |
|                                                     |        | Section 124                                                                    |      |      |      |      |      |      |      |
| Autographa californica nucleopolyhedrovirus NC 0... | (9472) | 9472                                                                           | 9482 | 9493 | 9504 | 9515 | 9526 | 9537 | 9548 |
|                                                     | (9472) | AGCCAACGCGCGATTGTTTAATATGCAACAAAAAACCAATGTCCTCGTAATTCATTTATTGTTTCGTTGTGTAAA    |      |      |      |      |      |      |      |
|                                                     | (1)    | -----                                                                          |      |      |      |      |      |      |      |
|                                                     |        | Section 125                                                                    |      |      |      |      |      |      |      |
| Autographa californica nucleopolyhedrovirus NC 0... | (9549) | 9549                                                                           | 9559 | 9570 | 9581 | 9592 | 9603 | 9614 | 9625 |
|                                                     | (9549) | TATTTAGAAAAACAAATGTACAATCAAACCTTATATATTATTTATACGAAATAAATACATAATAATAACTATTATA   |      |      |      |      |      |      |      |
|                                                     | (1)    | -----                                                                          |      |      |      |      |      |      |      |
|                                                     |        | Section 126                                                                    |      |      |      |      |      |      |      |
| Autographa californica nucleopolyhedrovirus NC 0... | (9626) | 9626                                                                           | 9636 | 9647 | 9658 | 9669 | 9680 | 9691 | 9702 |
|                                                     | (9626) | CATGTTTTTATTTTACAATACTTCCTGTATAACCTCTCTAACTACATTAGGAGTACAATCCACGTCAATTACACGTT  |      |      |      |      |      |      |      |
|                                                     | (1)    | -----                                                                          |      |      |      |      |      |      |      |

## SARS-CoV-2 &amp; Autographa californica nucleopolyhedrovirus.apr

|                                                     |         |                                                                                |       |       |       |       |       |       |       |
|-----------------------------------------------------|---------|--------------------------------------------------------------------------------|-------|-------|-------|-------|-------|-------|-------|
|                                                     |         | Section 127                                                                    |       |       |       |       |       |       |       |
| Autographa californica nucleopolyhedrovirus NC 0... | (9703)  | 9703                                                                           | 9713  | 9724  | 9735  | 9746  | 9757  | 9768  | 9779  |
|                                                     | (9703)  | TAGCTATTTTTCTAATTTTGTAAATGTTTATCGTAGAGTTTTTCGTTAATACATTGAATAGCCAACAAGGGATTGGG  |       |       |       |       |       |       |       |
|                                                     | (1)     | -----                                                                          |       |       |       |       |       |       |       |
|                                                     |         | Section 128                                                                    |       |       |       |       |       |       |       |
| Autographa californica nucleopolyhedrovirus NC 0... | (9780)  | 9780                                                                           | 9790  | 9801  | 9812  | 9823  | 9834  | 9845  | 9856  |
|                                                     | (9780)  | TGCACACCGTCATAGAGTACTTCCATGTCGTCCTCAAAGCGCATTTTTTCGCTTGCGAAAATGCCGCTCTTGGCCCAA |       |       |       |       |       |       |       |
|                                                     | (1)     | -----                                                                          |       |       |       |       |       |       |       |
|                                                     |         | Section 129                                                                    |       |       |       |       |       |       |       |
| Autographa californica nucleopolyhedrovirus NC 0... | (9857)  | 9857                                                                           | 9867  | 9878  | 9889  | 9900  | 9911  | 9922  | 9933  |
|                                                     | (9857)  | AACAAAAGCGAGTTTGATGCGGTCGTCGATGCGTTCCGAAAATACGGCCAAATGCTGGTGTTTGGTGATGTCGCGCG  |       |       |       |       |       |       |       |
|                                                     | (1)     | -----                                                                          |       |       |       |       |       |       |       |
|                                                     |         | Section 130                                                                    |       |       |       |       |       |       |       |
| Autographa californica nucleopolyhedrovirus NC 0... | (9934)  | 9934                                                                           | 9944  | 9955  | 9966  | 9977  | 9988  | 9999  | 10010 |
|                                                     | (9934)  | GAAACGTCACCGTGCCATTTTTGCTTTCCGCCACGACGGCGGTTTTCAATTTTTTCGGCCGACTGCAGCATGTTAAGT |       |       |       |       |       |       |       |
|                                                     | (1)     | -----                                                                          |       |       |       |       |       |       |       |
|                                                     |         | Section 131                                                                    |       |       |       |       |       |       |       |
| Autographa californica nucleopolyhedrovirus NC 0... | (10011) | 10011                                                                          | 10021 | 10032 | 10043 | 10054 | 10065 | 10076 | 10087 |
|                                                     | (10011) | TTGGCGTCGAGTTCGTGCAAACGCAATTCAAACCTGCTCAAACCTGTTGCCACCTCGTTCTTGAACGTCTCGTGGGT  |       |       |       |       |       |       |       |
|                                                     | (1)     | -----                                                                          |       |       |       |       |       |       |       |
|                                                     |         | Section 132                                                                    |       |       |       |       |       |       |       |
| Autographa californica nucleopolyhedrovirus NC 0... | (10088) | 10088                                                                          | 10098 | 10109 | 10120 | 10131 | 10142 | 10153 | 10164 |
|                                                     | (10088) | GACCATAAATTTTTCGCTGTTTGCATTTCAGTTTCTTTACATGTTTTAAACAGATTCAATCTTGTCGCGCAAATCAT  |       |       |       |       |       |       |       |
|                                                     | (1)     | -----                                                                          |       |       |       |       |       |       |       |
|                                                     |         | Section 133                                                                    |       |       |       |       |       |       |       |
| Autographa californica nucleopolyhedrovirus NC 0... | (10165) | 10165                                                                          | 10175 | 10186 | 10197 | 10208 | 10219 | 10230 | 10241 |
|                                                     | (10165) | CACGCTCGCCTTCAGTTTGAATGTGCAGCAACGCGTTGCTTTTGTGGCAAAATTTAACGCATCAAAATTTCCAAC    |       |       |       |       |       |       |       |
|                                                     | (1)     | -----                                                                          |       |       |       |       |       |       |       |

## SARS-CoV-2 &amp; Autographa californica nucleopolyhedrovirus.apr

|                                                     |         |                                                                               |       |       |       |       |       |       |       |
|-----------------------------------------------------|---------|-------------------------------------------------------------------------------|-------|-------|-------|-------|-------|-------|-------|
|                                                     |         | Section 134                                                                   |       |       |       |       |       |       |       |
| Autographa californica nucleopolyhedrovirus NC 0... | (10242) | 10242                                                                         | 10252 | 10263 | 10274 | 10285 | 10296 | 10307 | 10318 |
|                                                     | (10242) | AACCCTGCTTGGTCGCGAACAATGCGCCCAACGAGTTGAGATCGCGTTTGGATCTCTGTTTGTGAAAAACAATTC   |       |       |       |       |       |       |       |
|                                                     | (1)     | -----                                                                         |       |       |       |       |       |       |       |
|                                                     |         | Section 135                                                                   |       |       |       |       |       |       |       |
| Autographa californica nucleopolyhedrovirus NC 0... | (10319) | 10319                                                                         | 10329 | 10340 | 10351 | 10362 | 10373 | 10384 | 10395 |
|                                                     | (10319) | GTTTAAATGGTAAACTTGATCGCCGTCCCAATTGCAATCAAGTATGTCGTCGTGCGCAATTTCAAGACCTTTGCAAA |       |       |       |       |       |       |       |
|                                                     | (1)     | -----                                                                         |       |       |       |       |       |       |       |
|                                                     |         | Section 136                                                                   |       |       |       |       |       |       |       |
| Autographa californica nucleopolyhedrovirus NC 0... | (10396) | 10396                                                                         | 10406 | 10417 | 10428 | 10439 | 10450 | 10461 | 10472 |
|                                                     | (10396) | AATCTATCACATTGTAGCATTTTTCGTTTCGTGTCGCTGTGCACGTATCTGTACTTGAACTGTGCGTGTTGCATTTG |       |       |       |       |       |       |       |
|                                                     | (1)     | -----                                                                         |       |       |       |       |       |       |       |
|                                                     |         | Section 137                                                                   |       |       |       |       |       |       |       |
| Autographa californica nucleopolyhedrovirus NC 0... | (10473) | 10473                                                                         | 10483 | 10494 | 10505 | 10516 | 10527 | 10538 | 10549 |
|                                                     | (10473) | AATGAGTCCCATTTAACGATGTGCGACCATTGTTGGGCGTTTATGTGGTACTTTTGTAGTCGTCTGCATTGAACCG  |       |       |       |       |       |       |       |
|                                                     | (1)     | -----                                                                         |       |       |       |       |       |       |       |
|                                                     |         | Section 138                                                                   |       |       |       |       |       |       |       |
| Autographa californica nucleopolyhedrovirus NC 0... | (10550) | 10550                                                                         | 10560 | 10571 | 10582 | 10593 | 10604 | 10615 | 10626 |
|                                                     | (10550) | ATCTTCGGCGGCGATGGCGTCGTTGTCGTTGTACCCGGACCACATCCACCAGTTCATAACCAGGATAGCATTGCTT  |       |       |       |       |       |       |       |
|                                                     | (1)     | -----                                                                         |       |       |       |       |       |       |       |
|                                                     |         | Section 139                                                                   |       |       |       |       |       |       |       |
| Autographa californica nucleopolyhedrovirus NC 0... | (10627) | 10627                                                                         | 10637 | 10648 | 10659 | 10670 | 10681 | 10692 | 10703 |
|                                                     | (10627) | TAGCTTGTCTAGCAATTCCTTTGTTATACAACGAGAAAATTCGTTCCCTTATAATTATAGCTGTACGGTGCGCGTA  |       |       |       |       |       |       |       |
|                                                     | (1)     | -----                                                                         |       |       |       |       |       |       |       |
|                                                     |         | Section 140                                                                   |       |       |       |       |       |       |       |
| Autographa californica nucleopolyhedrovirus NC 0... | (10704) | 10704                                                                         | 10714 | 10725 | 10736 | 10747 | 10758 | 10769 | 10780 |
|                                                     | (10704) | TTTGTTTGTTAACGTTACAAAAATATCCCTGTCCACGTCCGGCCAATACTGCAACGTGAGCGCGTCCAAGTTTGAA  |       |       |       |       |       |       |       |
|                                                     | (1)     | -----                                                                         |       |       |       |       |       |       |       |

## SARS-CoV-2 &amp; Autographa californica nucleopolyhedrovirus.apr

|                                                     |         |                                                                               |       |       |       |       |       |       |       |
|-----------------------------------------------------|---------|-------------------------------------------------------------------------------|-------|-------|-------|-------|-------|-------|-------|
|                                                     |         | Section 141                                                                   |       |       |       |       |       |       |       |
| Autographa californica nucleopolyhedrovirus NC 0... | (10781) | 10781                                                                         | 10791 | 10802 | 10813 | 10824 | 10835 | 10846 | 10857 |
|                                                     | (10781) | TCTTGCATATGCGGAACGTACAAACGTACGGCCTCTCTCACACAATGCGCAAACTGCCCGGCTGAATGTAATCACT  |       |       |       |       |       |       |       |
|                                                     | (1)     | -----                                                                         |       |       |       |       |       |       |       |
|                                                     |         | Section 142                                                                   |       |       |       |       |       |       |       |
| Autographa californica nucleopolyhedrovirus NC 0... | (10858) | 10858                                                                         | 10868 | 10879 | 10890 | 10901 | 10912 | 10923 | 10934 |
|                                                     | (10858) | GTCCAACCTTTCAGGTTTCTCGAAAGCCTTGACCGATGCACGCGAACATTTTGAGCGGACGTGATTTTAACTTGT   |       |       |       |       |       |       |       |
|                                                     | (1)     | -----                                                                         |       |       |       |       |       |       |       |
|                                                     |         | Section 143                                                                   |       |       |       |       |       |       |       |
| Autographa californica nucleopolyhedrovirus NC 0... | (10935) | 10935                                                                         | 10945 | 10956 | 10967 | 10978 | 10989 | 11000 | 11011 |
|                                                     | (10935) | CGGTGAATTTTAACCACAAATGAAATCCACGGTTGCCGGTATACATGACTCTTGACACGTTCTCTTCCGTGTAAAC  |       |       |       |       |       |       |       |
|                                                     | (1)     | -----                                                                         |       |       |       |       |       |       |       |
|                                                     |         | Section 144                                                                   |       |       |       |       |       |       |       |
| Autographa californica nucleopolyhedrovirus NC 0... | (11012) | 11012                                                                         | 11022 | 11033 | 11044 | 11055 | 11066 | 11077 | 11088 |
|                                                     | (11012) | AACAGAAACGCCGTGGCGCCAATGTAAATTTTCAGCATTAATCGTGTTTCGTCAACATAATTTTGTAAATCGGCGTC |       |       |       |       |       |       |       |
|                                                     | (1)     | -----                                                                         |       |       |       |       |       |       |       |
|                                                     |         | Section 145                                                                   |       |       |       |       |       |       |       |
| Autographa californica nucleopolyhedrovirus NC 0... | (11089) | 11089                                                                         | 11099 | 11110 | 11121 | 11132 | 11143 | 11154 | 11165 |
|                                                     | (11089) | TACGACCCATTCCCTGCCGCCGCCGTCTCCAACGGTTTGACGTGCACGTCGGACACTTTGTTTGCACAATATAAC   |       |       |       |       |       |       |       |
|                                                     | (1)     | -----                                                                         |       |       |       |       |       |       |       |
|                                                     |         | Section 146                                                                   |       |       |       |       |       |       |       |
| Autographa californica nucleopolyhedrovirus NC 0... | (11166) | 11166                                                                         | 11176 | 11187 | 11198 | 11209 | 11220 | 11231 | 11242 |
|                                                     | (11166) | TATACAATTGTGCGGAGGTATCAAAATATCTGTCGGCGTGAATCCAGCGCGCGTTGACCGTCATGAACGCGTACTTG |       |       |       |       |       |       |       |
|                                                     | (1)     | -----                                                                         |       |       |       |       |       |       |       |
|                                                     |         | Section 147                                                                   |       |       |       |       |       |       |       |
| Autographa californica nucleopolyhedrovirus NC 0... | (11243) | 11243                                                                         | 11253 | 11264 | 11275 | 11286 | 11297 | 11308 | 11319 |
|                                                     | (11243) | CGGCTGTCGTTGTACGCAATGGCGTCCACATCATGTCGACGCGCTTCTGCGTATAATTGCACACTAACATGTTGCC  |       |       |       |       |       |       |       |
|                                                     | (1)     | -----                                                                         |       |       |       |       |       |       |       |

## SARS-CoV-2 &amp; Autographa californica nucleopolyhedrovirus.apr

|                                                     |         |                                                                                |       |       |       |       |       |       |       |
|-----------------------------------------------------|---------|--------------------------------------------------------------------------------|-------|-------|-------|-------|-------|-------|-------|
|                                                     |         | Section 148                                                                    |       |       |       |       |       |       |       |
| Autographa californica nucleopolyhedrovirus NC 0... | (11320) | 11320                                                                          | 11330 | 11341 | 11352 | 11363 | 11374 | 11385 | 11396 |
|                                                     | (11320) | CTTTGAACTTGACCTCGATTGTGTTAATTTTGGCTATAAAAAGGTCACCCCTTAAAATTGTTACATAATCAAATT    |       |       |       |       |       |       |       |
|                                                     | (1)     | -----                                                                          |       |       |       |       |       |       |       |
|                                                     |         | Section 149                                                                    |       |       |       |       |       |       |       |
| Autographa californica nucleopolyhedrovirus NC 0... | (11397) | 11397                                                                          | 11407 | 11418 | 11429 | 11440 | 11451 | 11462 | 11473 |
|                                                     | (11397) | ACCAGTACAGTTATTTCGGTTTGAAGCAAAATGACTATTCTCTGCTGGCTTGCACTGCTGTCTACGCTTACTGCTGTA |       |       |       |       |       |       |       |
|                                                     | (1)     | -----                                                                          |       |       |       |       |       |       |       |
|                                                     |         | Section 150                                                                    |       |       |       |       |       |       |       |
| Autographa californica nucleopolyhedrovirus NC 0... | (11474) | 11474                                                                          | 11484 | 11495 | 11506 | 11517 | 11528 | 11539 | 11550 |
|                                                     | (11474) | AATGCGGCCAATATATTGGCCGTGTTTCCTACGCCAGCTTACAGCCACCATATAGTGTACAAAGTGTATATTGAAGC  |       |       |       |       |       |       |       |
|                                                     | (1)     | -----                                                                          |       |       |       |       |       |       |       |
|                                                     |         | Section 151                                                                    |       |       |       |       |       |       |       |
| Autographa californica nucleopolyhedrovirus NC 0... | (11551) | 11551                                                                          | 11561 | 11572 | 11583 | 11594 | 11605 | 11616 | 11627 |
|                                                     | (11551) | CCTTGCCGAAAAATGTCACAACGTTACGGTCGTCAAGCCCAAACCTGTTTGCGTATTCAACTAAAACCTATTGCGGTA |       |       |       |       |       |       |       |
|                                                     | (1)     | -----                                                                          |       |       |       |       |       |       |       |
|                                                     |         | Section 152                                                                    |       |       |       |       |       |       |       |
| Autographa californica nucleopolyhedrovirus NC 0... | (11628) | 11628                                                                          | 11638 | 11649 | 11660 | 11671 | 11682 | 11693 | 11704 |
|                                                     | (11628) | ATATCACGGAAATTAATGCCGACATGTCTGTTGAGCAATACAAAAAAGTAGTGGCGAATTCGGCAATGTTTAGAAAG  |       |       |       |       |       |       |       |
|                                                     | (1)     | -----                                                                          |       |       |       |       |       |       |       |
|                                                     |         | Section 153                                                                    |       |       |       |       |       |       |       |
| Autographa californica nucleopolyhedrovirus NC 0... | (11705) | 11705                                                                          | 11715 | 11726 | 11737 | 11748 | 11759 | 11770 | 11781 |
|                                                     | (11705) | CGCGGAGTGGTGTCCGATACAGACACGGTAACCGCCGCTAACTACCTAGGCTTGATTGAAATGTTCAAAGACCAGTT  |       |       |       |       |       |       |       |
|                                                     | (1)     | -----                                                                          |       |       |       |       |       |       |       |
|                                                     |         | Section 154                                                                    |       |       |       |       |       |       |       |
| Autographa californica nucleopolyhedrovirus NC 0... | (11782) | 11782                                                                          | 11792 | 11803 | 11814 | 11825 | 11836 | 11847 | 11858 |
|                                                     | (11782) | TGACAATATCAACGTGCGCAATCTCATTGCCAACAACCAGACGTTTGATTAGTCGTCGTGGAAGCGTTTGCCGATT   |       |       |       |       |       |       |       |
|                                                     | (1)     | -----                                                                          |       |       |       |       |       |       |       |

## SARS-CoV-2 &amp; Autographa californica nucleopolyhedrovirus.apr

|                                                     |         |                                                                                |                       |                       |                       |                       |                       |                       |                       |
|-----------------------------------------------------|---------|--------------------------------------------------------------------------------|-----------------------|-----------------------|-----------------------|-----------------------|-----------------------|-----------------------|-----------------------|
|                                                     |         | Section 155                                                                    |                       |                       |                       |                       |                       |                       |                       |
| Autographa californica nucleopolyhedrovirus NC 0... | (11859) | <a href="#">11859</a>                                                          | <a href="#">11869</a> | <a href="#">11880</a> | <a href="#">11891</a> | <a href="#">11902</a> | <a href="#">11913</a> | <a href="#">11924</a> | <a href="#">11935</a> |
|                                                     | (11859) | ATGCGTTGGTGTTTGGTCACTTGTACGATCCGGCGCCCGTAATTCAAATCGCGCCTGGCTACGGTTTGGCGGAAAAAC |                       |                       |                       |                       |                       |                       |                       |
|                                                     | (1)     | -----                                                                          |                       |                       |                       |                       |                       |                       |                       |
|                                                     |         | Section 156                                                                    |                       |                       |                       |                       |                       |                       |                       |
| Autographa californica nucleopolyhedrovirus NC 0... | (11936) | <a href="#">11936</a>                                                          | <a href="#">11946</a> | <a href="#">11957</a> | <a href="#">11968</a> | <a href="#">11979</a> | <a href="#">11990</a> | <a href="#">12001</a> | <a href="#">12012</a> |
|                                                     | (11936) | TTTGACACGGTCGGCGCCGTGGCGCGGCACCCCGTCCACCATCCTAACATTTGGCGCAGCAATTTTCGACGACACGGA |                       |                       |                       |                       |                       |                       |                       |
|                                                     | (1)     | -----                                                                          |                       |                       |                       |                       |                       |                       |                       |
|                                                     |         | Section 157                                                                    |                       |                       |                       |                       |                       |                       |                       |
| Autographa californica nucleopolyhedrovirus NC 0... | (12013) | <a href="#">12013</a>                                                          | <a href="#">12023</a> | <a href="#">12034</a> | <a href="#">12045</a> | <a href="#">12056</a> | <a href="#">12067</a> | <a href="#">12078</a> | <a href="#">12089</a> |
|                                                     | (12013) | GGCAAACGTGATGACGGAAATGCGTTTGTATAAAGAATTTAAATTTTGGCCAACATGTCCAACGCGTTGCTCAAAC   |                       |                       |                       |                       |                       |                       |                       |
|                                                     | (1)     | -----                                                                          |                       |                       |                       |                       |                       |                       |                       |
|                                                     |         | Section 158                                                                    |                       |                       |                       |                       |                       |                       |                       |
| Autographa californica nucleopolyhedrovirus NC 0... | (12090) | <a href="#">12090</a>                                                          | <a href="#">12100</a> | <a href="#">12111</a> | <a href="#">12122</a> | <a href="#">12133</a> | <a href="#">12144</a> | <a href="#">12155</a> | <a href="#">12166</a> |
|                                                     | (12090) | AACAGTTTGGACCCAAACACACCGACAATTGAAAACTACGCAACAAGGTGCAATTGCTTTTGCTAAACCTGCATCCC  |                       |                       |                       |                       |                       |                       |                       |
|                                                     | (1)     | -----                                                                          |                       |                       |                       |                       |                       |                       |                       |
|                                                     |         | Section 159                                                                    |                       |                       |                       |                       |                       |                       |                       |
| Autographa californica nucleopolyhedrovirus NC 0... | (12167) | <a href="#">12167</a>                                                          | <a href="#">12177</a> | <a href="#">12188</a> | <a href="#">12199</a> | <a href="#">12210</a> | <a href="#">12221</a> | <a href="#">12232</a> | <a href="#">12243</a> |
|                                                     | (12167) | ATATTTGACAACAACCGACCCGTGCCGCCAGCGTGCAGTATCTTGGCGGAGGAATCCATCTTGTAAGAGCGCGCC    |                       |                       |                       |                       |                       |                       |                       |
|                                                     | (1)     | -----                                                                          |                       |                       |                       |                       |                       |                       |                       |
|                                                     |         | Section 160                                                                    |                       |                       |                       |                       |                       |                       |                       |
| Autographa californica nucleopolyhedrovirus NC 0... | (12244) | <a href="#">12244</a>                                                          | <a href="#">12254</a> | <a href="#">12265</a> | <a href="#">12276</a> | <a href="#">12287</a> | <a href="#">12298</a> | <a href="#">12309</a> | <a href="#">12320</a> |
|                                                     | (12244) | GTTGACCAAATTAAGTCCGGTCATCAACGCGCAAATGAACAAGTCAAAAAGCGGAACGATTTACGTAAGTTTTGGGT  |                       |                       |                       |                       |                       |                       |                       |
|                                                     | (1)     | -----                                                                          |                       |                       |                       |                       |                       |                       |                       |
|                                                     |         | Section 161                                                                    |                       |                       |                       |                       |                       |                       |                       |
| Autographa californica nucleopolyhedrovirus NC 0... | (12321) | <a href="#">12321</a>                                                          | <a href="#">12331</a> | <a href="#">12342</a> | <a href="#">12353</a> | <a href="#">12364</a> | <a href="#">12375</a> | <a href="#">12386</a> | <a href="#">12397</a> |
|                                                     | (12321) | CGAGCATTGACACCAAATCGTTTGCAAACGAGTTTCTTTACATGTTAATCAATACGTTCAAAACGTTGGATAATTAC  |                       |                       |                       |                       |                       |                       |                       |
|                                                     | (1)     | -----                                                                          |                       |                       |                       |                       |                       |                       |                       |

## SARS-CoV-2 &amp; Autographa californica nucleopolyhedrovirus.apr

|                                                     |         |                                                                                |       |       |       |       |       |       |       |
|-----------------------------------------------------|---------|--------------------------------------------------------------------------------|-------|-------|-------|-------|-------|-------|-------|
|                                                     |         | Section 162                                                                    |       |       |       |       |       |       |       |
| Autographa californica nucleopolyhedrovirus NC 0... | (12398) | 12398                                                                          | 12408 | 12419 | 12430 | 12441 | 12452 | 12463 | 12474 |
|                                                     | (12398) | ACCATATTATGGAAAATTGACGACGAAGTAGTAAAAAACATAACGTTGCCCGCCAACGTAATCACGCAAAATTGGTT  |       |       |       |       |       |       |       |
|                                                     | (1)     | -----                                                                          |       |       |       |       |       |       |       |
|                                                     |         | Section 163                                                                    |       |       |       |       |       |       |       |
| Autographa californica nucleopolyhedrovirus NC 0... | (12475) | 12475                                                                          | 12485 | 12496 | 12507 | 12518 | 12529 | 12540 | 12551 |
|                                                     | (12475) | TAATCAACGCGCCGTGCTGCGTCATAAAAAAATGGCGCGCTTTATTACGCAAGGCGGACTACAATCGAGCGACGAGG  |       |       |       |       |       |       |       |
|                                                     | (1)     | -----                                                                          |       |       |       |       |       |       |       |
|                                                     |         | Section 164                                                                    |       |       |       |       |       |       |       |
| Autographa californica nucleopolyhedrovirus NC 0... | (12552) | 12552                                                                          | 12562 | 12573 | 12584 | 12595 | 12606 | 12617 | 12628 |
|                                                     | (12552) | CCTTGGAAGCCGGGATACCCATGGTGTGTCTGCCCATGATGGGCGACCAAGTTTTACCATGCGCACAAATTACAGCAA |       |       |       |       |       |       |       |
|                                                     | (1)     | -----                                                                          |       |       |       |       |       |       |       |
|                                                     |         | Section 165                                                                    |       |       |       |       |       |       |       |
| Autographa californica nucleopolyhedrovirus NC 0... | (12629) | 12629                                                                          | 12639 | 12650 | 12661 | 12672 | 12683 | 12694 | 12705 |
|                                                     | (12629) | CTCGGCGTAGCCCGCGCCTTGACACTGTTACCGTTTCCAGCGATCAACTACTAGTGGCGATAAACGACGTGTTGTT   |       |       |       |       |       |       |       |
|                                                     | (1)     | -----                                                                          |       |       |       |       |       |       |       |
|                                                     |         | Section 166                                                                    |       |       |       |       |       |       |       |
| Autographa californica nucleopolyhedrovirus NC 0... | (12706) | 12706                                                                          | 12716 | 12727 | 12738 | 12749 | 12760 | 12771 | 12782 |
|                                                     | (12706) | TAACGCGCCTACCTACAAAAACACATGGCCGAGTTATATGCGCTCATCAATCATGATAAAGCAACGTTTCCGCCTC   |       |       |       |       |       |       |       |
|                                                     | (1)     | -----                                                                          |       |       |       |       |       |       |       |
|                                                     |         | Section 167                                                                    |       |       |       |       |       |       |       |
| Autographa californica nucleopolyhedrovirus NC 0... | (12783) | 12783                                                                          | 12793 | 12804 | 12815 | 12826 | 12837 | 12848 | 12859 |
|                                                     | (12783) | TAGATAAAGCCATCAAATTCACAGAACGCGTAATTCGATATAGACATGACATCAGTCGTCAATTGTATTCAATAAAA  |       |       |       |       |       |       |       |
|                                                     | (1)     | -----                                                                          |       |       |       |       |       |       |       |
|                                                     |         | Section 168                                                                    |       |       |       |       |       |       |       |
| Autographa californica nucleopolyhedrovirus NC 0... | (12860) | 12860                                                                          | 12870 | 12881 | 12892 | 12903 | 12914 | 12925 | 12936 |
|                                                     | (12860) | ACAACAGCTGCCAATGTACCGTATTCAAATTACTACATGTATAAATCTGTGTTTTCTATTGTAATGAATCACTTAAC  |       |       |       |       |       |       |       |
|                                                     | (1)     | -----                                                                          |       |       |       |       |       |       |       |



## SARS-CoV-2 &amp; Autographa californica nucleopolyhedrovirus.apr

|                                                     |         |                                                                                |       |       |       |       |       |       |       |
|-----------------------------------------------------|---------|--------------------------------------------------------------------------------|-------|-------|-------|-------|-------|-------|-------|
|                                                     |         | Section 169                                                                    |       |       |       |       |       |       |       |
| Autographa californica nucleopolyhedrovirus NC 0... | (12937) | 12937                                                                          | 12947 | 12958 | 12969 | 12980 | 12991 | 13002 | 13013 |
|                                                     | (12937) | ACACTTTTAAATTACGTCAATAAATGTTATTCACCATTATTTACCTGGTTTTTTTGAGAGGGGCTTTGTGCGACTGCG |       |       |       |       |       |       |       |
|                                                     | (1)     | -----                                                                          |       |       |       |       |       |       |       |
|                                                     |         | Section 170                                                                    |       |       |       |       |       |       |       |
| Autographa californica nucleopolyhedrovirus NC 0... | (13014) | 13014                                                                          | 13024 | 13035 | 13046 | 13057 | 13068 | 13079 | 13090 |
|                                                     | (13014) | CACTTCCAGCCTTTATAAACGCTCACCAACCAAAGCAGGTCATTATTGTGCCAGGACGTTCAAAGGCGAAACATCGA  |       |       |       |       |       |       |       |
|                                                     | (1)     | -----                                                                          |       |       |       |       |       |       |       |
|                                                     |         | Section 171                                                                    |       |       |       |       |       |       |       |
| Autographa californica nucleopolyhedrovirus NC 0... | (13091) | 13091                                                                          | 13101 | 13112 | 13123 | 13134 | 13145 | 13156 | 13167 |
|                                                     | (13091) | AATGGAGTCTGTTCAAACGCGCTTATGTGCCAGTAGCAATCAATTTGCTCCGTTCAAAAAGCGCCAGCTTGCCGTGC  |       |       |       |       |       |       |       |
|                                                     | (1)     | -----                                                                          |       |       |       |       |       |       |       |
|                                                     |         | Section 172                                                                    |       |       |       |       |       |       |       |
| Autographa californica nucleopolyhedrovirus NC 0... | (13168) | 13168                                                                          | 13178 | 13189 | 13200 | 13211 | 13222 | 13233 | 13244 |
|                                                     | (13168) | CGGTCCGTTCTGTGAACAGTTTGACACACACCATCACCTCCACCACCGTCACCAGCGTGATTCCAAAAAATTATCAA  |       |       |       |       |       |       |       |
|                                                     | (1)     | -----                                                                          |       |       |       |       |       |       |       |
|                                                     |         | Section 173                                                                    |       |       |       |       |       |       |       |
| Autographa californica nucleopolyhedrovirus NC 0... | (13245) | 13245                                                                          | 13255 | 13266 | 13277 | 13288 | 13299 | 13310 | 13321 |
|                                                     | (13245) | GAAAAACGTCAGAAAAATATGCCACATAATATCTTCGTTGCGTAACACGCACTTGAATTTCAATAAGATACAGTCTGT |       |       |       |       |       |       |       |
|                                                     | (1)     | -----                                                                          |       |       |       |       |       |       |       |
|                                                     |         | Section 174                                                                    |       |       |       |       |       |       |       |
| Autographa californica nucleopolyhedrovirus NC 0... | (13322) | 13322                                                                          | 13332 | 13343 | 13354 | 13365 | 13376 | 13387 | 13398 |
|                                                     | (13322) | ACATAAAAAGAACTGCGGCATTTGCAAAATTTGCTAAGAAAAAAGAACGAAATTATTGCCGAGTTGGTTAGAAAAC   |       |       |       |       |       |       |       |
|                                                     | (1)     | -----                                                                          |       |       |       |       |       |       |       |
|                                                     |         | Section 175                                                                    |       |       |       |       |       |       |       |
| Autographa californica nucleopolyhedrovirus NC 0... | (13399) | 13399                                                                          | 13409 | 13420 | 13431 | 13442 | 13453 | 13464 | 13475 |
|                                                     | (13399) | TTGAAAGTGCACAGAAGAAGACAACGCACAGAAATATTAGTAAACCAGCTCATTGGAAATACTTTGGAGTAGTCAGA  |       |       |       |       |       |       |       |
|                                                     | (1)     | -----                                                                          |       |       |       |       |       |       |       |

## SARS-CoV-2 &amp; Autographa californica nucleopolyhedrovirus.apr

|                                                     |         |                                                                                 |       |       |       |       |       |       |       |
|-----------------------------------------------------|---------|---------------------------------------------------------------------------------|-------|-------|-------|-------|-------|-------|-------|
|                                                     |         | Section 176                                                                     |       |       |       |       |       |       |       |
| Autographa californica nucleopolyhedrovirus NC 0... | (13476) | 13476                                                                           | 13486 | 13497 | 13508 | 13519 | 13530 | 13541 | 13552 |
|                                                     | (13476) | TGTGACAACACAATTTCGCACAATTATTGGCAACGAAAAGTTTGTAAAGGAGACGTTTGGCCGAGCTGTGCACATTGTA |       |       |       |       |       |       |       |
|                                                     | (1)     | -----                                                                           |       |       |       |       |       |       |       |
|                                                     |         | Section 177                                                                     |       |       |       |       |       |       |       |
| Autographa californica nucleopolyhedrovirus NC 0... | (13553) | 13553                                                                           | 13563 | 13574 | 13585 | 13596 | 13607 | 13618 | 13629 |
|                                                     | (13553) | CAACGCCGAGTACGTGTTTTGCCAAGCACGCGCCGATGGAGACAAAGATCGACAGGCACTAGCGAGTCTGCTGACGG   |       |       |       |       |       |       |       |
|                                                     | (1)     | -----                                                                           |       |       |       |       |       |       |       |
|                                                     |         | Section 178                                                                     |       |       |       |       |       |       |       |
| Autographa californica nucleopolyhedrovirus NC 0... | (13630) | 13630                                                                           | 13640 | 13651 | 13662 | 13673 | 13684 | 13695 | 13706 |
|                                                     | (13630) | CGGCGTTTGGTTCGCGAGTCATAGTTTATGAAAATAGTCGCCGGTTCGAGTTTATAAATCCGGACGAGATTGCTAGT   |       |       |       |       |       |       |       |
|                                                     | (1)     | -----                                                                           |       |       |       |       |       |       |       |
|                                                     |         | Section 179                                                                     |       |       |       |       |       |       |       |
| Autographa californica nucleopolyhedrovirus NC 0... | (13707) | 13707                                                                           | 13717 | 13728 | 13739 | 13750 | 13761 | 13772 | 13783 |
|                                                     | (13707) | GGTAAACGTTTAATAATTAAACATTTGCAAGATGAATCTCAAAGTGATATTAACGCCTATTAATTTGAAAGGTGAGG   |       |       |       |       |       |       |       |
|                                                     | (1)     | -----                                                                           |       |       |       |       |       |       |       |
|                                                     |         | Section 180                                                                     |       |       |       |       |       |       |       |
| Autographa californica nucleopolyhedrovirus NC 0... | (13784) | 13784                                                                           | 13794 | 13805 | 13816 | 13827 | 13838 | 13849 | 13860 |
|                                                     | (13784) | AAGAGCCCAATTGCGTTGAGCGCATTACCATAATGCCATGTATTTTAATAGATACTGAGATCTGTTTAAATGTCAGA   |       |       |       |       |       |       |       |
|                                                     | (1)     | -----                                                                           |       |       |       |       |       |       |       |
|                                                     |         | Section 181                                                                     |       |       |       |       |       |       |       |
| Autographa californica nucleopolyhedrovirus NC 0... | (13861) | 13861                                                                           | 13871 | 13882 | 13893 | 13904 | 13915 | 13926 | 13937 |
|                                                     | (13861) | TGCCGTTTCTCCTTTTGCCAAATTCAAAGTATTGATTATTGTAGATGGCTTTGATAGCGCTTATATTCAGGCTACCTT  |       |       |       |       |       |       |       |
|                                                     | (1)     | -----                                                                           |       |       |       |       |       |       |       |
|                                                     |         | Section 182                                                                     |       |       |       |       |       |       |       |
| Autographa californica nucleopolyhedrovirus NC 0... | (13938) | 13938                                                                           | 13948 | 13959 | 13970 | 13981 | 13992 | 14003 | 14014 |
|                                                     | (13938) | TTGTAGCATTAGCGATAGTGTAAACAATTGTTAACAAATCTAACGAAAAGCATGTAACGTTTGACGGGTTTGTAAGGC  |       |       |       |       |       |       |       |
|                                                     | (1)     | -----                                                                           |       |       |       |       |       |       |       |

## SARS-CoV-2 &amp; Autographa californica nucleopolyhedrovirus.apr

|                                                     |         |                                                                                |       |       |       |       |       |             |
|-----------------------------------------------------|---------|--------------------------------------------------------------------------------|-------|-------|-------|-------|-------|-------------|
|                                                     |         | Section 183                                                                    |       |       |       |       |       |             |
| Autographa californica nucleopolyhedrovirus NC 0... | (14015) | 14015                                                                          | 14025 | 14036 | 14047 | 14058 | 14069 | 14080 14091 |
|                                                     | (14015) | CGGACGATGAAGGTACAACAATGCCTTATGTCATTGGACCATTATATTCTGTCGACGCTGCTGTCGCCGACCGTAAA  |       |       |       |       |       |             |
|                                                     | (1)     | -----                                                                          |       |       |       |       |       |             |
|                                                     |         | Section 184                                                                    |       |       |       |       |       |             |
| Autographa californica nucleopolyhedrovirus NC 0... | (14092) | 14092                                                                          | 14102 | 14113 | 14124 | 14135 | 14146 | 14157 14168 |
|                                                     | (14092) | GTGAAGGACGTGGTGGATTCAATTCAAAACCAACAGACAATGTTAAAAGTATTTATTAACGAGGCTAATGTGTATAA  |       |       |       |       |       |             |
|                                                     | (1)     | -----                                                                          |       |       |       |       |       |             |
|                                                     |         | Section 185                                                                    |       |       |       |       |       |             |
| Autographa californica nucleopolyhedrovirus NC 0... | (14169) | 14169                                                                          | 14179 | 14190 | 14201 | 14212 | 14223 | 14234 14245 |
|                                                     | (14169) | CAAATGGAATATGCTTAAAGGTTTAATTTATAATAATAACAATGAATCTGTTTTAGTAAAATAATGTAGTAAAATTT  |       |       |       |       |       |             |
|                                                     | (1)     | -----                                                                          |       |       |       |       |       |             |
|                                                     |         | Section 186                                                                    |       |       |       |       |       |             |
| Autographa californica nucleopolyhedrovirus NC 0... | (14246) | 14246                                                                          | 14256 | 14267 | 14278 | 14289 | 14300 | 14311 14322 |
|                                                     | (14246) | ATAAAGGTAGATAAAAAATTATAATATTAATAAAAAAATAATGTTACTAAATGGGTTCCCTGCGTTAAATTATTTTAC |       |       |       |       |       |             |
|                                                     | (1)     | -----                                                                          |       |       |       |       |       |             |
|                                                     |         | Section 187                                                                    |       |       |       |       |       |             |
| Autographa californica nucleopolyhedrovirus NC 0... | (14323) | 14323                                                                          | 14333 | 14344 | 14355 | 14366 | 14377 | 14388 14399 |
|                                                     | (14323) | GGGTAGACAGCTATTAAC TATTTTATTTTATTTTAAATTTAAATAAATGTATTGTTAGAAAATTGTGTTGTTTTATT |       |       |       |       |       |             |
|                                                     | (1)     | -----                                                                          |       |       |       |       |       |             |
|                                                     |         | Section 188                                                                    |       |       |       |       |       |             |
| Autographa californica nucleopolyhedrovirus NC 0... | (14400) | 14400                                                                          | 14410 | 14421 | 14432 | 14443 | 14454 | 14465 14476 |
|                                                     | (14400) | AGTATAACGAAAAAATACATGACATAAACCGCTTCCAATTTGGTCACACAACTCTTGTTGGATAGTTTACGTAA     |       |       |       |       |       |             |
|                                                     | (1)     | -----                                                                          |       |       |       |       |       |             |
|                                                     |         | Section 189                                                                    |       |       |       |       |       |             |
| Autographa californica nucleopolyhedrovirus NC 0... | (14477) | 14477                                                                          | 14487 | 14498 | 14509 | 14520 | 14531 | 14542 14553 |
|                                                     | (14477) | TGAGTTAAATAGGCGGGCAGTTGTCCGCTAAACGTGTCGGTGGTCAAGTAGATGTGCATTAATTTACGACAACCCAA  |       |       |       |       |       |             |
|                                                     | (1)     | -----                                                                          |       |       |       |       |       |             |

## SARS-CoV-2 &amp; Autographa californica nucleopolyhedrovirus.apr

|                                                     |         |                                                                                  |       |       |       |       |       |       |       |
|-----------------------------------------------------|---------|----------------------------------------------------------------------------------|-------|-------|-------|-------|-------|-------|-------|
|                                                     |         | Section 190                                                                      |       |       |       |       |       |       |       |
| Autographa californica nucleopolyhedrovirus NC 0... | (14554) | 14554                                                                            | 14564 | 14575 | 14586 | 14597 | 14608 | 14619 | 14630 |
|                                                     | (14554) | AGCGGGGGCCGCTTATGTCAAGTATTTTTTTTCACAAAATTGGTAATGGTTTCGTTTTGTTTCCTTGTACAAACACATGT |       |       |       |       |       |       |       |
|                                                     | (1)     | -----                                                                            |       |       |       |       |       |       |       |
|                                                     |         | Section 191                                                                      |       |       |       |       |       |       |       |
| Autographa californica nucleopolyhedrovirus NC 0... | (14631) | 14631                                                                            | 14641 | 14652 | 14663 | 14674 | 14685 | 14696 | 14707 |
|                                                     | (14631) | CGGTGTGATCGTTGACGCACGAGTTGTACGATTCCGCCGGCAGGTTGGCAAACAAGCGCTTGAGATGCTTGAGTCTG    |       |       |       |       |       |       |       |
|                                                     | (1)     | -----                                                                            |       |       |       |       |       |       |       |
|                                                     |         | Section 192                                                                      |       |       |       |       |       |       |       |
| Autographa californica nucleopolyhedrovirus NC 0... | (14708) | 14708                                                                            | 14718 | 14729 | 14740 | 14751 | 14762 | 14773 | 14784 |
|                                                     | (14708) | CGTTCAATTTTATAATCAAACCTTGTTGGTGAAAATGTCTTTCAGCAAGCACATTAAGTGGTCGTTCAAAACGCGCTG   |       |       |       |       |       |       |       |
|                                                     | (1)     | -----                                                                            |       |       |       |       |       |       |       |
|                                                     |         | Section 193                                                                      |       |       |       |       |       |       |       |
| Autographa californica nucleopolyhedrovirus NC 0... | (14785) | 14785                                                                            | 14795 | 14806 | 14817 | 14828 | 14839 | 14850 | 14861 |
|                                                     | (14785) | CAACGACGACACCAACACATGATATTCGTTTCCAAAAAGCGAAAAATTTTGGATGCAGCGGTCCGCGTTGAAGGGTC    |       |       |       |       |       |       |       |
|                                                     | (1)     | -----                                                                            |       |       |       |       |       |       |       |
|                                                     |         | Section 194                                                                      |       |       |       |       |       |       |       |
| Autographa californica nucleopolyhedrovirus NC 0... | (14862) | 14862                                                                            | 14872 | 14883 | 14894 | 14905 | 14916 | 14927 | 14938 |
|                                                     | (14862) | GTTTCATAATGCGCACGTTGACAAAAACACGTTGAAAGACAGCGGGGCTGTGGTTATTTTAACGCCGTTGTCGGTA     |       |       |       |       |       |       |       |
|                                                     | (1)     | -----                                                                            |       |       |       |       |       |       |       |
|                                                     |         | Section 195                                                                      |       |       |       |       |       |       |       |
| Autographa californica nucleopolyhedrovirus NC 0... | (14939) | 14939                                                                            | 14949 | 14960 | 14971 | 14982 | 14993 | 15004 | 15015 |
|                                                     | (14939) | TACTCGTCGACGCCGCTCTGCGCTTGTTATGTCAATTTGTAGCGCAAATCTAACCAAATCAAACATCATCGTTGTACTG  |       |       |       |       |       |       |       |
|                                                     | (1)     | -----                                                                            |       |       |       |       |       |       |       |
|                                                     |         | Section 196                                                                      |       |       |       |       |       |       |       |
| Autographa californica nucleopolyhedrovirus NC 0... | (15016) | 15016                                                                            | 15026 | 15037 | 15048 | 15059 | 15070 | 15081 | 15092 |
|                                                     | (15016) | TGTCCTTTATGCATTTTATATGGCGGTTTAAAGTGCAAGTTGATTTGGCCGTTTAAATCTATAGGCTCCGTTTTGATAAC |       |       |       |       |       |       |       |
|                                                     | (1)     | -----                                                                            |       |       |       |       |       |       |       |

## SARS-CoV-2 &amp; Autographa californica nucleopolyhedrovirus.apr

|                                                     |         |                                                                                |       |       |       |       |       |             |
|-----------------------------------------------------|---------|--------------------------------------------------------------------------------|-------|-------|-------|-------|-------|-------------|
|                                                     |         | Section 197                                                                    |       |       |       |       |       |             |
| Autographa californica nucleopolyhedrovirus NC 0... | (15093) | 15093                                                                          | 15103 | 15114 | 15125 | 15136 | 15147 | 15158 15169 |
|                                                     | (15093) | ATTTTCAGCACTACCAACGGATCCGACATGTAAACTTGACGCGTTAGCACGTCCAATTCAGCGTAATGTTGGTCGACG |       |       |       |       |       |             |
|                                                     | (1)     | -----                                                                          |       |       |       |       |       |             |
|                                                     |         | Section 198                                                                    |       |       |       |       |       |             |
| Autographa californica nucleopolyhedrovirus NC 0... | (15170) | 15170                                                                          | 15180 | 15191 | 15202 | 15213 | 15224 | 15235 15246 |
|                                                     | (15170) | CATTTTTGTAAATTAGTTTGCAGGTTGCAAAACATTTTTGCGCAAAAGCCGTAATAGTCAAAATCTATGCATTTTAA  |       |       |       |       |       |             |
|                                                     | (1)     | -----                                                                          |       |       |       |       |       |             |
|                                                     |         | Section 199                                                                    |       |       |       |       |       |             |
| Autographa californica nucleopolyhedrovirus NC 0... | (15247) | 15247                                                                          | 15257 | 15268 | 15279 | 15290 | 15301 | 15312 15323 |
|                                                     | (15247) | TGCGCTTCTGTCGTCGTCAATATGGCATGTACGGCTGCGCCTCCAGTTAACACGAATAAACCGCGTTTTTCGCAAA   |       |       |       |       |       |             |
|                                                     | (1)     | -----                                                                          |       |       |       |       |       |             |
|                                                     |         | Section 200                                                                    |       |       |       |       |       |             |
| Autographa californica nucleopolyhedrovirus NC 0... | (15324) | 15324                                                                          | 15334 | 15345 | 15356 | 15367 | 15378 | 15389 15400 |
|                                                     | (15324) | CTACGGCTTCGAAACAATCTTTGATAAATGCCAAGTTTGCCTTAGCCACAATTTTATCGCGCAGGCGATCTTCAATA  |       |       |       |       |       |             |
|                                                     | (1)     | -----                                                                          |       |       |       |       |       |             |
|                                                     |         | Section 201                                                                    |       |       |       |       |       |             |
| Autographa californica nucleopolyhedrovirus NC 0... | (15401) | 15401                                                                          | 15411 | 15422 | 15433 | 15444 | 15455 | 15466 15477 |
|                                                     | (15401) | TCCTTTGTCGTAATATAAGGTAGGACGCCAAGATTTAGTTGATTCAACAAACGTTCCATAATGAATAGCGGCGACGC  |       |       |       |       |       |             |
|                                                     | (1)     | -----                                                                          |       |       |       |       |       |             |
|                                                     |         | Section 202                                                                    |       |       |       |       |       |             |
| Autographa californica nucleopolyhedrovirus NC 0... | (15478) | 15478                                                                          | 15488 | 15499 | 15510 | 15521 | 15532 | 15543 15554 |
|                                                     | (15478) | AACACGACTACACTGTTCAAATGCGCACGCAAAACAAACCTTGCAACTTTATTTGCCAATCGTAATCACAGTAGTT   |       |       |       |       |       |             |
|                                                     | (1)     | -----                                                                          |       |       |       |       |       |             |
|                                                     |         | Section 203                                                                    |       |       |       |       |       |             |
| Autographa californica nucleopolyhedrovirus NC 0... | (15555) | 15555                                                                          | 15565 | 15576 | 15587 | 15598 | 15609 | 15620 15631 |
|                                                     | (15555) | TTTACGAGTACGCCATCGCGTTTGTAAAGCACATTGCTTTTTAAAAATAATTTAAATTTAATGACCGCGTGCAATTTG |       |       |       |       |       |             |
|                                                     | (1)     | -----                                                                          |       |       |       |       |       |             |

## SARS-CoV-2 &amp; Autographa californica nucleopolyhedrovirus.apr

|                                                     |         |                                                                               |       |       |       |       |       |       |       |
|-----------------------------------------------------|---------|-------------------------------------------------------------------------------|-------|-------|-------|-------|-------|-------|-------|
|                                                     |         | Section 204                                                                   |       |       |       |       |       |       |       |
| Autographa californica nucleopolyhedrovirus NC 0... | (15632) | 15632                                                                         | 15642 | 15653 | 15664 | 15675 | 15686 | 15697 | 15708 |
|                                                     | (15632) | ATCAACTCGTTGATCAACTTTGAACTCAACATGTTTGGTAAAAGTTTATTGCTAAATGGATTGTGTAATTTCTGCAT |       |       |       |       |       |       |       |
|                                                     | (1)     | -----                                                                         |       |       |       |       |       |       |       |
|                                                     |         | Section 205                                                                   |       |       |       |       |       |       |       |
| Autographa californica nucleopolyhedrovirus NC 0... | (15709) | 15709                                                                         | 15719 | 15730 | 15741 | 15752 | 15763 | 15774 | 15785 |
|                                                     | (15709) | TGCTAACAGCGACGGGGTTACGATTCAACATAAAATGTTAACCAACGTGTTAAGTTTTTTGTTGGAAAAATATTATT |       |       |       |       |       |       |       |
|                                                     | (1)     | -----                                                                         |       |       |       |       |       |       |       |
|                                                     |         | Section 206                                                                   |       |       |       |       |       |       |       |
| Autographa californica nucleopolyhedrovirus NC 0... | (15786) | 15786                                                                         | 15796 | 15807 | 15818 | 15829 | 15840 | 15851 | 15862 |
|                                                     | (15786) | AAAAATAAATAAATAAACTTGTTTCAGTTCTAATTATTGTTTTATTTTTTATAAAATAATACAATTTTATTATACAT |       |       |       |       |       |       |       |
|                                                     | (1)     | -----                                                                         |       |       |       |       |       |       |       |
|                                                     |         | Section 207                                                                   |       |       |       |       |       |       |       |
| Autographa californica nucleopolyhedrovirus NC 0... | (15863) | 15863                                                                         | 15873 | 15884 | 15895 | 15906 | 15917 | 15928 | 15939 |
|                                                     | (15863) | TAATACTTTGGTATTTATTAATACAATTATTTACAATACTTTATTTACACTATAATACTTTATTTACATTAGTACTA |       |       |       |       |       |       |       |
|                                                     | (1)     | -----                                                                         |       |       |       |       |       |       |       |
|                                                     |         | Section 208                                                                   |       |       |       |       |       |       |       |
| Autographa californica nucleopolyhedrovirus NC 0... | (15940) | 15940                                                                         | 15950 | 15961 | 15972 | 15983 | 15994 | 16005 | 16016 |
|                                                     | (15940) | AATTAATACTAAATTACGCTAATACTAAATTAATACTTTATATAATCAAAAATAATACTTTATATAATACTTTCTAA |       |       |       |       |       |       |       |
|                                                     | (1)     | -----                                                                         |       |       |       |       |       |       |       |
|                                                     |         | Section 209                                                                   |       |       |       |       |       |       |       |
| Autographa californica nucleopolyhedrovirus NC 0... | (16017) | 16017                                                                         | 16027 | 16038 | 16049 | 16060 | 16071 | 16082 | 16093 |
|                                                     | (16017) | TCATCATAAACGGGTAATAGTTTTTCTCTTGAAATTTACGCTGCAACTCTTCGCTAAACACATGGGCGGTGGAGT   |       |       |       |       |       |       |       |
|                                                     | (1)     | -----                                                                         |       |       |       |       |       |       |       |
|                                                     |         | Section 210                                                                   |       |       |       |       |       |       |       |
| Autographa californica nucleopolyhedrovirus NC 0... | (16094) | 16094                                                                         | 16104 | 16115 | 16126 | 16137 | 16148 | 16159 | 16170 |
|                                                     | (16094) | GGGAGCGGGTGGAGTAGGAGTCCTTACGGGTTTGATGGGCGACAGTTCTCTGGACTTGCGGAACAGCTTGGGCGAAA |       |       |       |       |       |       |       |
|                                                     | (1)     | -----                                                                         |       |       |       |       |       |       |       |

## SARS-CoV-2 &amp; Autographa californica nucleopolyhedrovirus.apr

|                                                     |         |                                                                                |       |       |       |       |       |       |       |
|-----------------------------------------------------|---------|--------------------------------------------------------------------------------|-------|-------|-------|-------|-------|-------|-------|
|                                                     |         | Section 211                                                                    |       |       |       |       |       |       |       |
| Autographa californica nucleopolyhedrovirus NC 0... | (16171) | 16171                                                                          | 16181 | 16192 | 16203 | 16214 | 16225 | 16236 | 16247 |
|                                                     | (16171) | ACGTCGGCGTGCGCCGACTAATGATTTCTTCATCGCACGAGGCGTCGCACATTGTGCACGCGTCCGGTGAGGTACAC  |       |       |       |       |       |       |       |
|                                                     | (1)     | -----                                                                          |       |       |       |       |       |       |       |
|                                                     |         | Section 212                                                                    |       |       |       |       |       |       |       |
| Autographa californica nucleopolyhedrovirus NC 0... | (16248) | 16248                                                                          | 16258 | 16269 | 16280 | 16291 | 16302 | 16313 | 16324 |
|                                                     | (16248) | AAAACTTTCTTGGGCACGCTGTACACGGCTTGGGCACGCTATATGTGTTGCCAAAAC TAGAACTCGTTGTGGTTGC  |       |       |       |       |       |       |       |
|                                                     | (1)     | -----                                                                          |       |       |       |       |       |       |       |
|                                                     |         | Section 213                                                                    |       |       |       |       |       |       |       |
| Autographa californica nucleopolyhedrovirus NC 0... | (16325) | 16325                                                                          | 16335 | 16346 | 16357 | 16368 | 16379 | 16390 | 16401 |
|                                                     | (16325) | CGAACGGAGACGATGGGTGTGAAGACGGCGATGGCTGTGAAGACAAGTCCGAAGGCGCGATAAAAGATGAAAGTGTT  |       |       |       |       |       |       |       |
|                                                     | (1)     | -----                                                                          |       |       |       |       |       |       |       |
|                                                     |         | Section 214                                                                    |       |       |       |       |       |       |       |
| Autographa californica nucleopolyhedrovirus NC 0... | (16402) | 16402                                                                          | 16412 | 16423 | 16434 | 16445 | 16456 | 16467 | 16478 |
|                                                     | (16402) | TCTGAAACCGAAGTGGTGGTAGAAGTGGTAGAAGGCGGGTGC GTTACGGCAACCACGCTGCTGCTATTTCTGCCTTC |       |       |       |       |       |       |       |
|                                                     | (1)     | -----                                                                          |       |       |       |       |       |       |       |
|                                                     |         | Section 215                                                                    |       |       |       |       |       |       |       |
| Autographa californica nucleopolyhedrovirus NC 0... | (16479) | 16479                                                                          | 16489 | 16500 | 16511 | 16522 | 16533 | 16544 | 16555 |
|                                                     | (16479) | GGAGACCACTTCCAGCAATCTAGAGTTACTCTCTCGTTCTTCGCGGCGATAGTCAATGTCGCAATAATGTTTCATAAG |       |       |       |       |       |       |       |
|                                                     | (1)     | -----                                                                          |       |       |       |       |       |       |       |
|                                                     |         | Section 216                                                                    |       |       |       |       |       |       |       |
| Autographa californica nucleopolyhedrovirus NC 0... | (16556) | 16556                                                                          | 16566 | 16577 | 16588 | 16599 | 16610 | 16621 | 16632 |
|                                                     | (16556) | ATGCCTTTTCGGCTTCGGCGCGCCTTTTCATGTATATGTTGTGACGCATCTCCTTTAACTGCACGTACAAATTCCAG  |       |       |       |       |       |       |       |
|                                                     | (1)     | -----                                                                          |       |       |       |       |       |       |       |
|                                                     |         | Section 217                                                                    |       |       |       |       |       |       |       |
| Autographa californica nucleopolyhedrovirus NC 0... | (16633) | 16633                                                                          | 16643 | 16654 | 16665 | 16676 | 16687 | 16698 | 16709 |
|                                                     | (16633) | CATTGCACAGCCAGTATCGTAAGCACGCCCATTATGATTACGGGATAATTTTGATTAAACACGGTCGGCTCGTGATC  |       |       |       |       |       |       |       |
|                                                     | (1)     | -----                                                                          |       |       |       |       |       |       |       |

## SARS-CoV-2 &amp; Autographa californica nucleopolyhedrovirus.apr

|                                                     |         |                                                                               |       |       |       |       |       |             |
|-----------------------------------------------------|---------|-------------------------------------------------------------------------------|-------|-------|-------|-------|-------|-------------|
|                                                     |         | Section 218                                                                   |       |       |       |       |       |             |
| Autographa californica nucleopolyhedrovirus NC 0... | (16710) | 16710                                                                         | 16720 | 16731 | 16742 | 16753 | 16764 | 16775 16786 |
|                                                     | (16710) | GCTTACAATCGCTCGGCACATGATGCATTTTTGTAAATGTTACATACACACAGTTTGGCTCAAGGTTTCGGTAT    |       |       |       |       |       |             |
|                                                     | (1)     | -----                                                                         |       |       |       |       |       |             |
|                                                     |         | Section 219                                                                   |       |       |       |       |       |             |
| Autographa californica nucleopolyhedrovirus NC 0... | (16787) | 16787                                                                         | 16797 | 16808 | 16819 | 16830 | 16841 | 16852 16863 |
|                                                     | (16787) | TTGCGTAGTCAATTTCCAGATACACGATAGAGTTCCAGCACATTGATTCCAAATCGTAGTGACGATATAAAACATCT |       |       |       |       |       |             |
|                                                     | (1)     | -----                                                                         |       |       |       |       |       |             |
|                                                     |         | Section 220                                                                   |       |       |       |       |       |             |
| Autographa californica nucleopolyhedrovirus NC 0... | (16864) | 16864                                                                         | 16874 | 16885 | 16896 | 16907 | 16918 | 16929 16940 |
|                                                     | (16864) | AGCGCCGGTAGATGACCATTTTTGAACACGTAGATTTGAAACGCGGCAAACAGCATCCAACACAGCCCAGTGATCAC |       |       |       |       |       |             |
|                                                     | (1)     | -----                                                                         |       |       |       |       |       |             |
|                                                     |         | Section 221                                                                   |       |       |       |       |       |             |
| Autographa californica nucleopolyhedrovirus NC 0... | (16941) | 16941                                                                         | 16951 | 16962 | 16973 | 16984 | 16995 | 17006 17017 |
|                                                     | (16941) | GTTTACCATAATACACGTGATAGCGACGTAAAAGTTTTCTTTCGCATTGAAATTTACATTTGTGTTGAAGAGCTGC  |       |       |       |       |       |             |
|                                                     | (1)     | -----                                                                         |       |       |       |       |       |             |
|                                                     |         | Section 222                                                                   |       |       |       |       |       |             |
| Autographa californica nucleopolyhedrovirus NC 0... | (17018) | 17018                                                                         | 17028 | 17039 | 17050 | 17061 | 17072 | 17083 17094 |
|                                                     | (17018) | TGCGATTTTTTCGTCCACACGATAATCTTCCATATAAAATAAAACATGTAAATAATATCCACATGCCGAACGCCAGC |       |       |       |       |       |             |
|                                                     | (1)     | -----                                                                         |       |       |       |       |       |             |
|                                                     |         | Section 223                                                                   |       |       |       |       |       |             |
| Autographa californica nucleopolyhedrovirus NC 0... | (17095) | 17095                                                                         | 17105 | 17116 | 17127 | 17138 | 17149 | 17160 17171 |
|                                                     | (17095) | ATTATCGGTATAGATAGATTGATAACCGATTGCTTTCCTTCAATTTCCAGCAAAAACGCGTATCTGCTGTCTATCAC |       |       |       |       |       |             |
|                                                     | (1)     | -----                                                                         |       |       |       |       |       |             |
|                                                     |         | Section 224                                                                   |       |       |       |       |       |             |
| Autographa californica nucleopolyhedrovirus NC 0... | (17172) | 17172                                                                         | 17182 | 17193 | 17204 | 17215 | 17226 | 17237 17248 |
|                                                     | (17172) | TCCCATATAGATAACACAAACACTATCAGATATGCTAATAATAATGAGGCATTAAGCCCGAATTGTAAAACTGCAG  |       |       |       |       |       |             |
|                                                     | (1)     | -----                                                                         |       |       |       |       |       |             |



## SARS-CoV-2 &amp; Autographa californica nucleopolyhedrovirus.apr

|                                                     |         |                                                                                |       |       |       |       |       |       |       |
|-----------------------------------------------------|---------|--------------------------------------------------------------------------------|-------|-------|-------|-------|-------|-------|-------|
|                                                     |         | Section 225                                                                    |       |       |       |       |       |       |       |
| Autographa californica nucleopolyhedrovirus NC 0... | (17249) | 17249                                                                          | 17259 | 17270 | 17281 | 17292 | 17303 | 17314 | 17325 |
|                                                     | (17249) | TGATTTTATTTAACATTTTGAATATTTAATTCAACAACCTAAGTAATGGCAATATGTATCGAGTACTGATCGTGT    |       |       |       |       |       |       |       |
|                                                     | (1)     | -----                                                                          |       |       |       |       |       |       |       |
|                                                     |         | Section 226                                                                    |       |       |       |       |       |       |       |
| Autographa californica nucleopolyhedrovirus NC 0... | (17326) | 17326                                                                          | 17336 | 17347 | 17358 | 17369 | 17380 | 17391 | 17402 |
|                                                     | (17326) | TCCTGTTTCGTGTTTCTTTATATAGTGTACCAGCCCTTTATCAGGCATACTTGTCATATCGGACATGCCCAACAAGAT |       |       |       |       |       |       |       |
|                                                     | (1)     | -----                                                                          |       |       |       |       |       |       |       |
|                                                     |         | Section 227                                                                    |       |       |       |       |       |       |       |
| Autographa californica nucleopolyhedrovirus NC 0... | (17403) | 17403                                                                          | 17413 | 17424 | 17435 | 17446 | 17457 | 17468 | 17479 |
|                                                     | (17403) | TACAATGACACGTTGGACGATAGGATGGATTACATTGAATCCGTAATGCGTAGAAGGCACTACGTGCCGATTGAAGC  |       |       |       |       |       |       |       |
|                                                     | (1)     | -----                                                                          |       |       |       |       |       |       |       |
|                                                     |         | Section 228                                                                    |       |       |       |       |       |       |       |
| Autographa californica nucleopolyhedrovirus NC 0... | (17480) | 17480                                                                          | 17490 | 17501 | 17512 | 17523 | 17534 | 17545 | 17556 |
|                                                     | (17480) | GTTGCCCGCAATCAGGTTTGATACTAATCTCGGCACGTTGGCCGGTGACACGATTAAATGCATGTCGGTGCCCTTGT  |       |       |       |       |       |       |       |
|                                                     | (1)     | -----                                                                          |       |       |       |       |       |       |       |
|                                                     |         | Section 229                                                                    |       |       |       |       |       |       |       |
| Autographa californica nucleopolyhedrovirus NC 0... | (17557) | 17557                                                                          | 17567 | 17578 | 17589 | 17600 | 17611 | 17622 | 17633 |
|                                                     | (17557) | TTGTTAGTGACATTGACCTGCCGATGTTTGATTGTAGTCAGATATGCGATAACCCGTCTGCGGCGTATTTCTTTGTC  |       |       |       |       |       |       |       |
|                                                     | (1)     | -----                                                                          |       |       |       |       |       |       |       |
|                                                     |         | Section 230                                                                    |       |       |       |       |       |       |       |
| Autographa californica nucleopolyhedrovirus NC 0... | (17634) | 17634                                                                          | 17644 | 17655 | 17666 | 17677 | 17688 | 17699 | 17710 |
|                                                     | (17634) | AACGAAACGGATGTGTTTGTGGTCAACGGCCACAGACTGACGGTGGGCGGATACTGCTCCACTAATAGTTTGCCCCG  |       |       |       |       |       |       |       |
|                                                     | (1)     | -----                                                                          |       |       |       |       |       |       |       |
|                                                     |         | Section 231                                                                    |       |       |       |       |       |       |       |
| Autographa californica nucleopolyhedrovirus NC 0... | (17711) | 17711                                                                          | 17721 | 17732 | 17743 | 17754 | 17765 | 17776 | 17787 |
|                                                     | (17711) | CAACTGTAATCGCGAGACGAGCGTCATTTTAATGAGTCTCAATCAGTGGACGTGCATAGCCGAGGACCCGCGTTACT  |       |       |       |       |       |       |       |
|                                                     | (1)     | -----                                                                          |       |       |       |       |       |       |       |

## SARS-CoV-2 &amp; Autographa californica nucleopolyhedrovirus.apr

|                                                     |         |                                                                                |       |       |       |       |       |             |
|-----------------------------------------------------|---------|--------------------------------------------------------------------------------|-------|-------|-------|-------|-------|-------------|
|                                                     |         | Section 232                                                                    |       |       |       |       |       |             |
| Autographa californica nucleopolyhedrovirus NC 0... | (17788) | 17788                                                                          | 17798 | 17809 | 17820 | 17831 | 17842 | 17853 17864 |
|                                                     | (17788) | ATGCGGGGCACAGATAACATGACGCAACTCGCAGGCAGACAACACTTTGACCGCATTATGCCCGGACAGAGTGATAGG |       |       |       |       |       |             |
|                                                     | (1)     | -----                                                                          |       |       |       |       |       |             |
|                                                     |         | Section 233                                                                    |       |       |       |       |       |             |
| Autographa californica nucleopolyhedrovirus NC 0... | (17865) | 17865                                                                          | 17875 | 17886 | 17897 | 17908 | 17919 | 17930 17941 |
|                                                     | (17865) | AACGTCCTGTTTGACCGATTACTAGGCCGAGAGGTGAACGTGACCACTAACACGTTTCGCCGAGCTGGGACGAGTT   |       |       |       |       |       |             |
|                                                     | (1)     | -----                                                                          |       |       |       |       |       |             |
|                                                     |         | Section 234                                                                    |       |       |       |       |       |             |
| Autographa californica nucleopolyhedrovirus NC 0... | (17942) | 17942                                                                          | 17952 | 17963 | 17974 | 17985 | 17996 | 18007 18018 |
|                                                     | (17942) | GCTGGAGGACGGCACTAGGCGGTTTCGAAATGCGCTGCAACGCCCGAGATAACAACAATAATCTCATGTTTGTTAATC |       |       |       |       |       |             |
|                                                     | (1)     | -----                                                                          |       |       |       |       |       |             |
|                                                     |         | Section 235                                                                    |       |       |       |       |       |             |
| Autographa californica nucleopolyhedrovirus NC 0... | (18019) | 18019                                                                          | 18029 | 18040 | 18051 | 18062 | 18073 | 18084 18095 |
|                                                     | (18019) | CGCTTAATCCCCTCGAGTGTCTCCCGAACGTGTGCACTAACGTTAGCAACGTGCACACCAGTGTTAGACCCGTATTT  |       |       |       |       |       |             |
|                                                     | (1)     | -----                                                                          |       |       |       |       |       |             |
|                                                     |         | Section 236                                                                    |       |       |       |       |       |             |
| Autographa californica nucleopolyhedrovirus NC 0... | (18096) | 18096                                                                          | 18106 | 18117 | 18128 | 18139 | 18150 | 18161 18172 |
|                                                     | (18096) | GAAACGGGAGAGTGTGACTGCGGCGACGAAGCGGTACGCGTGTTACGCACATTGTGCCGGGGGACAGGACCTCTAT   |       |       |       |       |       |             |
|                                                     | (1)     | -----                                                                          |       |       |       |       |       |             |
|                                                     |         | Section 237                                                                    |       |       |       |       |       |             |
| Autographa californica nucleopolyhedrovirus NC 0... | (18173) | 18173                                                                          | 18183 | 18194 | 18205 | 18216 | 18227 | 18238 18249 |
|                                                     | (18173) | GTGTGCCAGCATTATAGATGGCCTGGATAAAAGTACGGCATCATATAGATATCGCGTAGAGTGCGTTAATCTGTACA  |       |       |       |       |       |             |
|                                                     | (1)     | -----                                                                          |       |       |       |       |       |             |
|                                                     |         | Section 238                                                                    |       |       |       |       |       |             |
| Autographa californica nucleopolyhedrovirus NC 0... | (18250) | 18250                                                                          | 18260 | 18271 | 18282 | 18293 | 18304 | 18315 18326 |
|                                                     | (18250) | CCTCTATTCTAAATTATTCTAATAACAAATTGTTATGTCCCAGTGACACTTTTGATAGTAACACGGACGCAGCTTTT  |       |       |       |       |       |             |
|                                                     | (1)     | -----                                                                          |       |       |       |       |       |             |

## SARS-CoV-2 &amp; Autographa californica nucleopolyhedrovirus.apr

|                                                     |         |                                                                                 |       |       |       |       |       |       |       |
|-----------------------------------------------------|---------|---------------------------------------------------------------------------------|-------|-------|-------|-------|-------|-------|-------|
|                                                     |         | Section 239                                                                     |       |       |       |       |       |       |       |
| Autographa californica nucleopolyhedrovirus NC 0... | (18327) | 18327                                                                           | 18337 | 18348 | 18359 | 18370 | 18381 | 18392 | 18403 |
|                                                     | (18327) | GCCTTTGAAGTGCCCGGCTCCTACCCCTTTATCGCGCAACGGCATCAACGAGCCAACCTTATCGCTTTTATCTTGATAC |       |       |       |       |       |       |       |
|                                                     | (1)     | -----                                                                           |       |       |       |       |       |       |       |
|                                                     |         | Section 240                                                                     |       |       |       |       |       |       |       |
| Autographa californica nucleopolyhedrovirus NC 0... | (18404) | 18404                                                                           | 18414 | 18425 | 18436 | 18447 | 18458 | 18469 | 18480 |
|                                                     | (18404) | CAGATCTCGAGTTAATTACAATGACGTCAGAGGGCAGTTATCTTAATTGTGATAACACAAACAATAAGTCATTTAAA   |       |       |       |       |       |       |       |
|                                                     | (1)     | -----                                                                           |       |       |       |       |       |       |       |
|                                                     |         | Section 241                                                                     |       |       |       |       |       |       |       |
| Autographa californica nucleopolyhedrovirus NC 0... | (18481) | 18481                                                                           | 18491 | 18502 | 18513 | 18524 | 18535 | 18546 | 18557 |
|                                                     | (18481) | TGTTACGTCAGTAGTTAGTATATAAGCCGTACATGTTGGCTTGCAAATTCAGTCAATATCAGGCTTTTATCATGGAC   |       |       |       |       |       |       |       |
|                                                     | (1)     | -----                                                                           |       |       |       |       |       |       |       |
|                                                     |         | Section 242                                                                     |       |       |       |       |       |       |       |
| Autographa californica nucleopolyhedrovirus NC 0... | (18558) | 18558                                                                           | 18568 | 18579 | 18590 | 18601 | 18612 | 18623 | 18634 |
|                                                     | (18558) | GGTGTAAGCTGCTAGGGACGTGCGCGCTAATAATTTTGTATCGACGACGAGTACAGTTGTGCGGGCGTGACCGTAT    |       |       |       |       |       |       |       |
|                                                     | (1)     | -----                                                                           |       |       |       |       |       |       |       |
|                                                     |         | Section 243                                                                     |       |       |       |       |       |       |       |
| Autographa californica nucleopolyhedrovirus NC 0... | (18635) | 18635                                                                           | 18645 | 18656 | 18667 | 18678 | 18689 | 18700 | 18711 |
|                                                     | (18635) | CACGTTTACGCCGATAGAAGATAGCGCAGGCCTCATGTTTGAACGCATGTACGGCTTGCGACATCATACAGACGACA   |       |       |       |       |       |       |       |
|                                                     | (1)     | -----                                                                           |       |       |       |       |       |       |       |
|                                                     |         | Section 244                                                                     |       |       |       |       |       |       |       |
| Autographa californica nucleopolyhedrovirus NC 0... | (18712) | 18712                                                                           | 18722 | 18733 | 18744 | 18755 | 18766 | 18777 | 18788 |
|                                                     | (18712) | GATTTGTGTTTGTGAAAAATTCAATTTTGTTCGGTGCTGCAAGAGCTCAATAATATCAAATCTAAAATTGAATTA     |       |       |       |       |       |       |       |
|                                                     | (1)     | -----                                                                           |       |       |       |       |       |       |       |
|                                                     |         | Section 245                                                                     |       |       |       |       |       |       |       |
| Autographa californica nucleopolyhedrovirus NC 0... | (18789) | 18789                                                                           | 18799 | 18810 | 18821 | 18832 | 18843 | 18854 | 18865 |
|                                                     | (18789) | TATGAAGCGCAAGTTTCAACTTGCACAAACGTCAGACAAATAAAACAGAACAGATCGAGTATCATCAAAGCTCGCAT   |       |       |       |       |       |       |       |
|                                                     | (1)     | -----                                                                           |       |       |       |       |       |       |       |

## SARS-CoV-2 &amp; Autographa californica nucleopolyhedrovirus.apr

|                                                     |         |                                                                                 |       |       |       |       |       |       |       |
|-----------------------------------------------------|---------|---------------------------------------------------------------------------------|-------|-------|-------|-------|-------|-------|-------|
|                                                     |         | Section 246                                                                     |       |       |       |       |       |       |       |
| Autographa californica nucleopolyhedrovirus NC 0... | (18866) | 18866                                                                           | 18876 | 18887 | 18898 | 18909 | 18920 | 18931 | 18942 |
|                                                     | (18866) | TGAAAATCAGCTGCAGTTTTTTGACGCAACTAAACAAAAATCTCATCACATACTCTGTGGAAAGCAGCATTTTAAAGCA |       |       |       |       |       |       |       |
|                                                     | (1)     | -----                                                                           |       |       |       |       |       |       |       |
|                                                     |         | Section 247                                                                     |       |       |       |       |       |       |       |
| Autographa californica nucleopolyhedrovirus NC 0... | (18943) | 18943                                                                           | 18953 | 18964 | 18975 | 18986 | 18997 | 19008 | 19019 |
|                                                     | (18943) | ACGACGTGCTGGACAACATCGATCTGGAATATGACGACAGCGGTGAGTTTGACGTTTACGACGAATACGAACAGCCT   |       |       |       |       |       |       |       |
|                                                     | (1)     | -----                                                                           |       |       |       |       |       |       |       |
|                                                     |         | Section 248                                                                     |       |       |       |       |       |       |       |
| Autographa californica nucleopolyhedrovirus NC 0... | (19020) | 19020                                                                           | 19030 | 19041 | 19052 | 19063 | 19074 | 19085 | 19096 |
|                                                     | (19020) | TCGCATTGGAGCAACATGACTGTATCCGACGCGCAAGCTTTGCTCCGAAACCCGCCCAAAGACAGAGTAATGTTTTT   |       |       |       |       |       |       |       |
|                                                     | (1)     | -----                                                                           |       |       |       |       |       |       |       |
|                                                     |         | Section 249                                                                     |       |       |       |       |       |       |       |
| Autographa californica nucleopolyhedrovirus NC 0... | (19097) | 19097                                                                           | 19107 | 19118 | 19129 | 19140 | 19151 | 19162 | 19173 |
|                                                     | (19097) | GGACACGGTTACCACCAGCGACGTGAGCAGCAAATACGAAGAATACATAAACTGCATTGTGAGCAACCGTACCGTTG   |       |       |       |       |       |       |       |
|                                                     | (1)     | -----                                                                           |       |       |       |       |       |       |       |
|                                                     |         | Section 250                                                                     |       |       |       |       |       |       |       |
| Autographa californica nucleopolyhedrovirus NC 0... | (19174) | 19174                                                                           | 19184 | 19195 | 19206 | 19217 | 19228 | 19239 | 19250 |
|                                                     | (19174) | AAAACGAGTGCATGTTTTTAGCCAACATGATGAACGTGCTCAACGACAAATTGGACGACGCAGCAGCTTTGGCCAAG   |       |       |       |       |       |       |       |
|                                                     | (1)     | -----                                                                           |       |       |       |       |       |       |       |
|                                                     |         | Section 251                                                                     |       |       |       |       |       |       |       |
| Autographa californica nucleopolyhedrovirus NC 0... | (19251) | 19251                                                                           | 19261 | 19272 | 19283 | 19294 | 19305 | 19316 | 19327 |
|                                                     | (19251) | ATGCTGGAGCGAATAGTAAACAAACGCGAAAGAACAACCTCAACATCTCCAACACGGTTATAGACGACGACACGCT    |       |       |       |       |       |       |       |
|                                                     | (1)     | -----                                                                           |       |       |       |       |       |       |       |
|                                                     |         | Section 252                                                                     |       |       |       |       |       |       |       |
| Autographa californica nucleopolyhedrovirus NC 0... | (19328) | 19328                                                                           | 19338 | 19349 | 19360 | 19371 | 19382 | 19393 | 19404 |
|                                                     | (19328) | GCTAACGGAAATGAAAAAATTAACACAACTTTATACAACCAAAACCGCGTGTGGGTAGTGGATTTTAAACAAGGACA   |       |       |       |       |       |       |       |
|                                                     | (1)     | -----                                                                           |       |       |       |       |       |       |       |

## SARS-CoV-2 &amp; Autographa californica nucleopolyhedrovirus.apr

|                                                     |         |                                                                                |       |       |       |       |       |             |
|-----------------------------------------------------|---------|--------------------------------------------------------------------------------|-------|-------|-------|-------|-------|-------------|
|                                                     |         | Section 253                                                                    |       |       |       |       |       |             |
| Autographa californica nucleopolyhedrovirus NC 0... | (19405) | 19405                                                                          | 19415 | 19426 | 19437 | 19448 | 19459 | 19470 19481 |
|                                                     | (19405) | TGAATAGTTATTTTCGATTTGTCGCAAGCGTATAAATTGCATTTATATGTTGATTAAACACGGTCATTATGTTTATT  |       |       |       |       |       |             |
| SARS-CoV-2 NC_045512.2                              | (1)     | -----                                                                          |       |       |       |       |       |             |
|                                                     |         | Section 254                                                                    |       |       |       |       |       |             |
| Autographa californica nucleopolyhedrovirus NC 0... | (19482) | 19482                                                                          | 19492 | 19503 | 19514 | 19525 | 19536 | 19547 19558 |
|                                                     | (19482) | ACCATGCCATTGTTAAATCCACCGCGTTTCGTTTAATTTGTATCGCGTCATGACGGTGCCTTTTTGCAGGGGCAA    |       |       |       |       |       |             |
| SARS-CoV-2 NC_045512.2                              | (1)     | -----                                                                          |       |       |       |       |       |             |
|                                                     |         | Section 255                                                                    |       |       |       |       |       |             |
| Autographa californica nucleopolyhedrovirus NC 0... | (19559) | 19559                                                                          | 19569 | 19580 | 19591 | 19602 | 19613 | 19624 19635 |
|                                                     | (19559) | AATGTGTCTGCTTATCATTTTCGGGCAATGAATACTTTGGGATTACAGACAGCAAAACTATTATGTGCCCGTATCTG  |       |       |       |       |       |             |
| SARS-CoV-2 NC_045512.2                              | (1)     | -----                                                                          |       |       |       |       |       |             |
|                                                     |         | Section 256                                                                    |       |       |       |       |       |             |
| Autographa californica nucleopolyhedrovirus NC 0... | (19636) | 19636                                                                          | 19646 | 19657 | 19668 | 19679 | 19690 | 19701 19712 |
|                                                     | (19636) | ATAACTTTAGACAAGATTGCCAAGAGTTTACGGGCTACAATGAGTTTTTGTGTCCCGAACTGAGCCGATTGCCACT   |       |       |       |       |       |             |
| SARS-CoV-2 NC_045512.2                              | (1)     | -----                                                                          |       |       |       |       |       |             |
|                                                     |         | Section 257                                                                    |       |       |       |       |       |             |
| Autographa californica nucleopolyhedrovirus NC 0... | (19713) | 19713                                                                          | 19723 | 19734 | 19745 | 19756 | 19767 | 19778 19789 |
|                                                     | (19713) | ATGAACTCGAAAGTGTGCGAGATTGAAATGTTTATGGGTCGATATAGCGACGACGTGGACAACATGTGCGACATTAG  |       |       |       |       |       |             |
| SARS-CoV-2 NC_045512.2                              | (1)     | -----                                                                          |       |       |       |       |       |             |
|                                                     |         | Section 258                                                                    |       |       |       |       |       |             |
| Autographa californica nucleopolyhedrovirus NC 0... | (19790) | 19790                                                                          | 19800 | 19811 | 19822 | 19833 | 19844 | 19855 19866 |
|                                                     | (19790) | GGTGGCCAATTATAATCCCAAAAAAGCTTACGTGAACACTTTAATAGACTACCGAAAATGGTTGTACATTTTTTCAA  |       |       |       |       |       |             |
| SARS-CoV-2 NC_045512.2                              | (1)     | -----                                                                          |       |       |       |       |       |             |
|                                                     |         | Section 259                                                                    |       |       |       |       |       |             |
| Autographa californica nucleopolyhedrovirus NC 0... | (19867) | 19867                                                                          | 19877 | 19888 | 19899 | 19910 | 19921 | 19932 19943 |
|                                                     | (19867) | ACACGACCGTGTCCGTCCACTATTATTGTACACGACGCGCTTGTAGAAGTTGATACAAAAGTTTCGCCCGGCGTTGGT |       |       |       |       |       |             |
| SARS-CoV-2 NC_045512.2                              | (1)     | -----                                                                          |       |       |       |       |       |             |

## SARS-CoV-2 &amp; Autographa californica nucleopolyhedrovirus.apr

|                                                     |         |                                                                                 |                       |                       |                       |                       |                       |                       |                       |
|-----------------------------------------------------|---------|---------------------------------------------------------------------------------|-----------------------|-----------------------|-----------------------|-----------------------|-----------------------|-----------------------|-----------------------|
|                                                     |         | Section 260                                                                     |                       |                       |                       |                       |                       |                       |                       |
| Autographa californica nucleopolyhedrovirus NC 0... | (19944) | <a href="#">19944</a>                                                           | <a href="#">19954</a> | <a href="#">19965</a> | <a href="#">19976</a> | <a href="#">19987</a> | <a href="#">19998</a> | <a href="#">20009</a> | <a href="#">20020</a> |
|                                                     | (19944) | GTTATGTTTTTCGACTATGGCGCAAACGTGTTTCGATTAGAATAACGTATGATGTGACCATAACTGTAGATTCGCGATT |                       |                       |                       |                       |                       |                       |                       |
|                                                     | (1)     | -----                                                                           |                       |                       |                       |                       |                       |                       |                       |
|                                                     |         | Section 261                                                                     |                       |                       |                       |                       |                       |                       |                       |
| Autographa californica nucleopolyhedrovirus NC 0... | (20021) | <a href="#">20021</a>                                                           | <a href="#">20031</a> | <a href="#">20042</a> | <a href="#">20053</a> | <a href="#">20064</a> | <a href="#">20075</a> | <a href="#">20086</a> | <a href="#">20097</a> |
|                                                     | (20021) | TTATGTCAGCCATTCAACTACATACTGGCCTAAAAAGAAATTTAATTTTAACAACACTACATCGACCAAATGTTGCTTG |                       |                       |                       |                       |                       |                       |                       |
|                                                     | (1)     | -----                                                                           |                       |                       |                       |                       |                       |                       |                       |
|                                                     |         | Section 262                                                                     |                       |                       |                       |                       |                       |                       |                       |
| Autographa californica nucleopolyhedrovirus NC 0... | (20098) | <a href="#">20098</a>                                                           | <a href="#">20108</a> | <a href="#">20119</a> | <a href="#">20130</a> | <a href="#">20141</a> | <a href="#">20152</a> | <a href="#">20163</a> | <a href="#">20174</a> |
|                                                     | (20098) | AAAAAGCGACCACCAGTTTTATACCGACTGTTGACAATTTACCCGGCCCGTTTTATTGCAACTTCCTCATAAATTT    |                       |                       |                       |                       |                       |                       |                       |
|                                                     | (1)     | -----                                                                           |                       |                       |                       |                       |                       |                       |                       |
|                                                     |         | Section 263                                                                     |                       |                       |                       |                       |                       |                       |                       |
| Autographa californica nucleopolyhedrovirus NC 0... | (20175) | <a href="#">20175</a>                                                           | <a href="#">20185</a> | <a href="#">20196</a> | <a href="#">20207</a> | <a href="#">20218</a> | <a href="#">20229</a> | <a href="#">20240</a> | <a href="#">20251</a> |
|                                                     | (20175) | CACATTAAAGATTACACATCGACGCCCCATCATTTTTTCCATCAGTCTAAAATTTACACCAACAGCGCGGCCCGA     |                       |                       |                       |                       |                       |                       |                       |
|                                                     | (1)     | -----                                                                           |                       |                       |                       |                       |                       |                       |                       |
|                                                     |         | Section 264                                                                     |                       |                       |                       |                       |                       |                       |                       |
| Autographa californica nucleopolyhedrovirus NC 0... | (20252) | <a href="#">20252</a>                                                           | <a href="#">20262</a> | <a href="#">20273</a> | <a href="#">20284</a> | <a href="#">20295</a> | <a href="#">20306</a> | <a href="#">20317</a> | <a href="#">20328</a> |
|                                                     | (20252) | CGAAGACTCGCAAGACGACAGTAATACCACCGTGGTTATTATCGCTATTGTCGCTGCAATGATCCTATTCTGTGGAT   |                       |                       |                       |                       |                       |                       |                       |
|                                                     | (1)     | -----                                                                           |                       |                       |                       |                       |                       |                       |                       |
|                                                     |         | Section 265                                                                     |                       |                       |                       |                       |                       |                       |                       |
| Autographa californica nucleopolyhedrovirus NC 0... | (20329) | <a href="#">20329</a>                                                           | <a href="#">20339</a> | <a href="#">20350</a> | <a href="#">20361</a> | <a href="#">20372</a> | <a href="#">20383</a> | <a href="#">20394</a> | <a href="#">20405</a> |
|                                                     | (20329) | TATTGTTATTTTTGTTTTGCTGTATAAAAAAACGGTGTCATCAATCAAATAACGTGGTTGTGCAATACAAAAATAAC   |                       |                       |                       |                       |                       |                       |                       |
|                                                     | (1)     | -----                                                                           |                       |                       |                       |                       |                       |                       |                       |
|                                                     |         | Section 266                                                                     |                       |                       |                       |                       |                       |                       |                       |
| Autographa californica nucleopolyhedrovirus NC 0... | (20406) | <a href="#">20406</a>                                                           | <a href="#">20416</a> | <a href="#">20427</a> | <a href="#">20438</a> | <a href="#">20449</a> | <a href="#">20460</a> | <a href="#">20471</a> | <a href="#">20482</a> |
|                                                     | (20406) | AATGAATTTGTCACAATTTGCAATAATTTAGAAGACAATCGAGCATACATTAATTTACCTAATGAATACGATAGCGA   |                       |                       |                       |                       |                       |                       |                       |
|                                                     | (1)     | -----                                                                           |                       |                       |                       |                       |                       |                       |                       |

## SARS-CoV-2 &amp; Autographa californica nucleopolyhedrovirus.apr

|                                                     |         |                                                                                |                       |                       |                       |                       |                       |                       |                       |
|-----------------------------------------------------|---------|--------------------------------------------------------------------------------|-----------------------|-----------------------|-----------------------|-----------------------|-----------------------|-----------------------|-----------------------|
|                                                     |         | Section 267                                                                    |                       |                       |                       |                       |                       |                       |                       |
| Autographa californica nucleopolyhedrovirus NC 0... | (20483) | <a href="#">20483</a>                                                          | <a href="#">20493</a> | <a href="#">20504</a> | <a href="#">20515</a> | <a href="#">20526</a> | <a href="#">20537</a> | <a href="#">20548</a> | <a href="#">20559</a> |
|                                                     | (20483) | TGATATGCCAAAACCATTTGTACCCTTTACTTGGCTTTAATGATGATTTGTTAAAAGATGATAAACCTGTGTTGTACC |                       |                       |                       |                       |                       |                       |                       |
|                                                     | (1)     | -----                                                                          |                       |                       |                       |                       |                       |                       |                       |
|                                                     |         | Section 268                                                                    |                       |                       |                       |                       |                       |                       |                       |
| Autographa californica nucleopolyhedrovirus NC 0... | (20560) | <a href="#">20560</a>                                                          | <a href="#">20570</a> | <a href="#">20581</a> | <a href="#">20592</a> | <a href="#">20603</a> | <a href="#">20614</a> | <a href="#">20625</a> | <a href="#">20636</a> |
|                                                     | (20560) | CTATGATTATAGAAAGAATAAAATAAAACATGTATAATTGAAATAAATATATTATTTAATAAAATGTTTTTTATTTA  |                       |                       |                       |                       |                       |                       |                       |
|                                                     | (1)     | -----                                                                          |                       |                       |                       |                       |                       |                       |                       |
|                                                     |         | Section 269                                                                    |                       |                       |                       |                       |                       |                       |                       |
| Autographa californica nucleopolyhedrovirus NC 0... | (20637) | <a href="#">20637</a>                                                          | <a href="#">20647</a> | <a href="#">20658</a> | <a href="#">20669</a> | <a href="#">20680</a> | <a href="#">20691</a> | <a href="#">20702</a> | <a href="#">20713</a> |
|                                                     | (20637) | TATACTATTTTCTATTACATATTCCAATGCACACAAATGTTTAATGGCTATCAGTTTTAATTTTACTAATTCGTCTA  |                       |                       |                       |                       |                       |                       |                       |
|                                                     | (1)     | -----                                                                          |                       |                       |                       |                       |                       |                       |                       |
|                                                     |         | Section 270                                                                    |                       |                       |                       |                       |                       |                       |                       |
| Autographa californica nucleopolyhedrovirus NC 0... | (20714) | <a href="#">20714</a>                                                          | <a href="#">20724</a> | <a href="#">20735</a> | <a href="#">20746</a> | <a href="#">20757</a> | <a href="#">20768</a> | <a href="#">20779</a> | <a href="#">20790</a> |
|                                                     | (20714) | AACAAAAATTATTCACTTGCTGTTTTTCATCCATTTGACATATGGCGTTTATAAATAATTCGCTGTGTTTTATGAAC  |                       |                       |                       |                       |                       |                       |                       |
|                                                     | (1)     | -----                                                                          |                       |                       |                       |                       |                       |                       |                       |
|                                                     |         | Section 271                                                                    |                       |                       |                       |                       |                       |                       |                       |
| Autographa californica nucleopolyhedrovirus NC 0... | (20791) | <a href="#">20791</a>                                                          | <a href="#">20801</a> | <a href="#">20812</a> | <a href="#">20823</a> | <a href="#">20834</a> | <a href="#">20845</a> | <a href="#">20856</a> | <a href="#">20867</a> |
|                                                     | (20791) | GAATCGTAAACCGCTGCCTGGGCCTTCAGCACGGTCGGCGCATTTGTATTTTTGGGTAAAGTACGCAATATTTTTAGT |                       |                       |                       |                       |                       |                       |                       |
|                                                     | (1)     | -----                                                                          |                       |                       |                       |                       |                       |                       |                       |
|                                                     |         | Section 272                                                                    |                       |                       |                       |                       |                       |                       |                       |
| Autographa californica nucleopolyhedrovirus NC 0... | (20868) | <a href="#">20868</a>                                                          | <a href="#">20878</a> | <a href="#">20889</a> | <a href="#">20900</a> | <a href="#">20911</a> | <a href="#">20922</a> | <a href="#">20933</a> | <a href="#">20944</a> |
|                                                     | (20868) | CAAACACAGAGATTTTAAATCTTTTTCATTTATATCCAAGTCGGAACAATCGTATACAAAATCTAGCTTTTCACTTT  |                       |                       |                       |                       |                       |                       |                       |
|                                                     | (1)     | -----                                                                          |                       |                       |                       |                       |                       |                       |                       |
|                                                     |         | Section 273                                                                    |                       |                       |                       |                       |                       |                       |                       |
| Autographa californica nucleopolyhedrovirus NC 0... | (20945) | <a href="#">20945</a>                                                          | <a href="#">20955</a> | <a href="#">20966</a> | <a href="#">20977</a> | <a href="#">20988</a> | <a href="#">20999</a> | <a href="#">21010</a> | <a href="#">21021</a> |
|                                                     | (20945) | CGGGCGCGCCAGATACTGGTTTACGAGTTCGAGCTGCTCCACTTGGCCTTTGATATCGGCCGCTATGCACAACATT   |                       |                       |                       |                       |                       |                       |                       |
|                                                     | (1)     | -----                                                                          |                       |                       |                       |                       |                       |                       |                       |

## SARS-CoV-2 &amp; Autographa californica nucleopolyhedrovirus.apr

|                                                     |         |                                                                                 |                       |                       |                       |                       |                       |                       |                       |
|-----------------------------------------------------|---------|---------------------------------------------------------------------------------|-----------------------|-----------------------|-----------------------|-----------------------|-----------------------|-----------------------|-----------------------|
|                                                     |         | Section 274                                                                     |                       |                       |                       |                       |                       |                       |                       |
| Autographa californica nucleopolyhedrovirus NC 0... | (21022) | <a href="#">21022</a>                                                           | <a href="#">21032</a> | <a href="#">21043</a> | <a href="#">21054</a> | <a href="#">21065</a> | <a href="#">21076</a> | <a href="#">21087</a> | <a href="#">21098</a> |
|                                                     | (21022) | TTGTCGATTGCAGTTTTCATTGTTTTTAAACATAATAATTTTAACTTTTTTATTTTGCAATTTAATCAAACATTTTAA  |                       |                       |                       |                       |                       |                       |                       |
|                                                     | (1)     | -----                                                                           |                       |                       |                       |                       |                       |                       |                       |
|                                                     |         | Section 275                                                                     |                       |                       |                       |                       |                       |                       |                       |
| Autographa californica nucleopolyhedrovirus NC 0... | (21099) | <a href="#">21099</a>                                                           | <a href="#">21109</a> | <a href="#">21120</a> | <a href="#">21131</a> | <a href="#">21142</a> | <a href="#">21153</a> | <a href="#">21164</a> | <a href="#">21175</a> |
|                                                     | (21099) | ATTTCGCTTGACCTTTCTTACAAAGCGCAGTTAATATGCAAGACATTTTGACTTATAATAAAAAACAAAACATTTTATA |                       |                       |                       |                       |                       |                       |                       |
|                                                     | (1)     | -----                                                                           |                       |                       |                       |                       |                       |                       |                       |
|                                                     |         | Section 276                                                                     |                       |                       |                       |                       |                       |                       |                       |
| Autographa californica nucleopolyhedrovirus NC 0... | (21176) | <a href="#">21176</a>                                                           | <a href="#">21186</a> | <a href="#">21197</a> | <a href="#">21208</a> | <a href="#">21219</a> | <a href="#">21230</a> | <a href="#">21241</a> | <a href="#">21252</a> |
|                                                     | (21176) | TATTCATTTATTGTTCAATAATAACAAATATTCCAGGCTTAAAAGCTAACGAATAGGGCTTTTCGGTAATTTTCTTA   |                       |                       |                       |                       |                       |                       |                       |
|                                                     | (1)     | -----                                                                           |                       |                       |                       |                       |                       |                       |                       |
|                                                     |         | Section 277                                                                     |                       |                       |                       |                       |                       |                       |                       |
| Autographa californica nucleopolyhedrovirus NC 0... | (21253) | <a href="#">21253</a>                                                           | <a href="#">21263</a> | <a href="#">21274</a> | <a href="#">21285</a> | <a href="#">21296</a> | <a href="#">21307</a> | <a href="#">21318</a> | <a href="#">21329</a> |
|                                                     | (21253) | TTATTCATGTCCGTCATCTGCATCTCTTTGCCGTACTTGACGCCGTCGAATGGTGCCCATCATGTACATTTTAATCTC  |                       |                       |                       |                       |                       |                       |                       |
|                                                     | (1)     | -----                                                                           |                       |                       |                       |                       |                       |                       |                       |
|                                                     |         | Section 278                                                                     |                       |                       |                       |                       |                       |                       |                       |
| Autographa californica nucleopolyhedrovirus NC 0... | (21330) | <a href="#">21330</a>                                                           | <a href="#">21340</a> | <a href="#">21351</a> | <a href="#">21362</a> | <a href="#">21373</a> | <a href="#">21384</a> | <a href="#">21395</a> | <a href="#">21406</a> |
|                                                     | (21330) | CTCCGAAGGTCCGTCATTTTGTCCATTTTGAACAATCTATCAAAATCTTCAACGCTCATTCTCTGCATATCAAGAG    |                       |                       |                       |                       |                       |                       |                       |
|                                                     | (1)     | -----                                                                           |                       |                       |                       |                       |                       |                       |                       |
|                                                     |         | Section 279                                                                     |                       |                       |                       |                       |                       |                       |                       |
| Autographa californica nucleopolyhedrovirus NC 0... | (21407) | <a href="#">21407</a>                                                           | <a href="#">21417</a> | <a href="#">21428</a> | <a href="#">21439</a> | <a href="#">21450</a> | <a href="#">21461</a> | <a href="#">21472</a> | <a href="#">21483</a> |
|                                                     | (21407) | GAACGTTTCTGATCTTTCCGGTGGCGTAAATTGATCCGTTGTTGTACGGTTGATTATGTAAACCGACGAATCAAC     |                       |                       |                       |                       |                       |                       |                       |
|                                                     | (1)     | -----                                                                           |                       |                       |                       |                       |                       |                       |                       |
|                                                     |         | Section 280                                                                     |                       |                       |                       |                       |                       |                       |                       |
| Autographa californica nucleopolyhedrovirus NC 0... | (21484) | <a href="#">21484</a>                                                           | <a href="#">21494</a> | <a href="#">21505</a> | <a href="#">21516</a> | <a href="#">21527</a> | <a href="#">21538</a> | <a href="#">21549</a> | <a href="#">21560</a> |
|                                                     | (21484) | ATGTCGCGCTCGCTAGTTTTGTTCTTATCCGGCAAATGAATGCACACGTTTGGTTCCATCTTCAAAGGAAAATCGCT   |                       |                       |                       |                       |                       |                       |                       |
|                                                     | (1)     | -----                                                                           |                       |                       |                       |                       |                       |                       |                       |



## SARS-CoV-2 &amp; Autographa californica nucleopolyhedrovirus.apr

|                                                                                   |         |                                                                                |                       |                       |                       |                       |                       |                       |                       |
|-----------------------------------------------------------------------------------|---------|--------------------------------------------------------------------------------|-----------------------|-----------------------|-----------------------|-----------------------|-----------------------|-----------------------|-----------------------|
| Section 281                                                                       |         |                                                                                |                       |                       |                       |                       |                       |                       |                       |
| Autographa californica nucleopolyhedrovirus NC 045512.2<br>SARS-CoV-2 NC_045512.2 | (21561) | <a href="#">21561</a>                                                          | <a href="#">21571</a> | <a href="#">21582</a> | <a href="#">21593</a> | <a href="#">21604</a> | <a href="#">21615</a> | <a href="#">21626</a> | <a href="#">21637</a> |
|                                                                                   | (21561) | TTGCAAGTGTTTTTGCAAAATGTTGCCAAATATATTGTTGTGTTTGTGAATGTCTCCGTATTGAATGCTAAAAAACT  |                       |                       |                       |                       |                       |                       |                       |
|                                                                                   | (1)     | -----                                                                          |                       |                       |                       |                       |                       |                       |                       |
| Section 282                                                                       |         |                                                                                |                       |                       |                       |                       |                       |                       |                       |
| Autographa californica nucleopolyhedrovirus NC 045512.2<br>SARS-CoV-2 NC_045512.2 | (21638) | <a href="#">21638</a>                                                          | <a href="#">21648</a> | <a href="#">21659</a> | <a href="#">21670</a> | <a href="#">21681</a> | <a href="#">21692</a> | <a href="#">21703</a> | <a href="#">21714</a> |
|                                                                                   | (21638) | GGCCAAAGTTGCTTTTGGCACGTTTTATGGTTCCAAAGTCGGAAAACCAAAATCCGCAGGGCTTGCCCTGCACTCTT  |                       |                       |                       |                       |                       |                       |                       |
|                                                                                   | (1)     | -----                                                                          |                       |                       |                       |                       |                       |                       |                       |
| Section 283                                                                       |         |                                                                                |                       |                       |                       |                       |                       |                       |                       |
| Autographa californica nucleopolyhedrovirus NC 045512.2<br>SARS-CoV-2 NC_045512.2 | (21715) | <a href="#">21715</a>                                                          | <a href="#">21725</a> | <a href="#">21736</a> | <a href="#">21747</a> | <a href="#">21758</a> | <a href="#">21769</a> | <a href="#">21780</a> | <a href="#">21791</a> |
|                                                                                   | (21715) | GGACCGATGGTGTACGTAGTCTTGCCGTTGGCCGGCTCCAACACCACGATATTTTTATCGGGCTCGGGATACAACCTT |                       |                       |                       |                       |                       |                       |                       |
|                                                                                   | (1)     | -----                                                                          |                       |                       |                       |                       |                       |                       |                       |
| Section 284                                                                       |         |                                                                                |                       |                       |                       |                       |                       |                       |                       |
| Autographa californica nucleopolyhedrovirus NC 045512.2<br>SARS-CoV-2 NC_045512.2 | (21792) | <a href="#">21792</a>                                                          | <a href="#">21802</a> | <a href="#">21813</a> | <a href="#">21824</a> | <a href="#">21835</a> | <a href="#">21846</a> | <a href="#">21857</a> | <a href="#">21868</a> |
|                                                                                   | (21792) | GTCTTCCCATTTCGTGCAAACTGTTCAAATTAGACAGTCGACAAAATTCGTTTTTCAAAAATCTGCCTTCGAAACAAC |                       |                       |                       |                       |                       |                       |                       |
|                                                                                   | (1)     | -----                                                                          |                       |                       |                       |                       |                       |                       |                       |
| Section 285                                                                       |         |                                                                                |                       |                       |                       |                       |                       |                       |                       |
| Autographa californica nucleopolyhedrovirus NC 045512.2<br>SARS-CoV-2 NC_045512.2 | (21869) | <a href="#">21869</a>                                                          | <a href="#">21879</a> | <a href="#">21890</a> | <a href="#">21901</a> | <a href="#">21912</a> | <a href="#">21923</a> | <a href="#">21934</a> | <a href="#">21945</a> |
|                                                                                   | (21869) | TACAATTCAGTATTGAAAAGTTGCCTCGTTTCACATTAATCGCCATCTGCTCCTGCCACAACATCTTCGTCAACTCG  |                       |                       |                       |                       |                       |                       |                       |
|                                                                                   | (1)     | -----                                                                          |                       |                       |                       |                       |                       |                       |                       |
| Section 286                                                                       |         |                                                                                |                       |                       |                       |                       |                       |                       |                       |
| Autographa californica nucleopolyhedrovirus NC 045512.2<br>SARS-CoV-2 NC_045512.2 | (21946) | <a href="#">21946</a>                                                          | <a href="#">21956</a> | <a href="#">21967</a> | <a href="#">21978</a> | <a href="#">21989</a> | <a href="#">22000</a> | <a href="#">22011</a> | <a href="#">22022</a> |
|                                                                                   | (21946) | TGTGGCTCCAATTGAATGGACGACGGCGTAAAATAGCACATTACGCCCGTTTCGTGCTGTTTCACGTTAAAGCGCC   |                       |                       |                       |                       |                       |                       |                       |
|                                                                                   | (1)     | -----                                                                          |                       |                       |                       |                       |                       |                       |                       |
| Section 287                                                                       |         |                                                                                |                       |                       |                       |                       |                       |                       |                       |
| Autographa californica nucleopolyhedrovirus NC 045512.2<br>SARS-CoV-2 NC_045512.2 | (22023) | <a href="#">22023</a>                                                          | <a href="#">22033</a> | <a href="#">22044</a> | <a href="#">22055</a> | <a href="#">22066</a> | <a href="#">22077</a> | <a href="#">22088</a> | <a href="#">22099</a> |
|                                                                                   | (22023) | GCTGTTGTACGGCACCAGCTGCTGGTCCTCACCACCTTCCGATCTTTCCCGCTTCGGCTGGTTGTGCTGCTGCTCG   |                       |                       |                       |                       |                       |                       |                       |
|                                                                                   | (1)     | -----                                                                          |                       |                       |                       |                       |                       |                       |                       |

## SARS-CoV-2 &amp; Autographa californica nucleopolyhedrovirus.apr

|                                                     |         |                                                                               |                       |                       |                       |                       |                       |                       |                       |
|-----------------------------------------------------|---------|-------------------------------------------------------------------------------|-----------------------|-----------------------|-----------------------|-----------------------|-----------------------|-----------------------|-----------------------|
| Section 288                                         |         |                                                                               |                       |                       |                       |                       |                       |                       |                       |
| Autographa californica nucleopolyhedrovirus NC 0... | (22100) | <a href="#">22100</a>                                                         | <a href="#">22110</a> | <a href="#">22121</a> | <a href="#">22132</a> | <a href="#">22143</a> | <a href="#">22154</a> | <a href="#">22165</a> | <a href="#">22176</a> |
|                                                     | (22100) | AATATCCATCGCCAATCTTGCGTTTAGTTGCCATGCTACCGACGTGCGCTGTCTGCTGTGGTTCAAGTCTAATTGAA |                       |                       |                       |                       |                       |                       |                       |
|                                                     | (1)     | -----                                                                         |                       |                       |                       |                       |                       |                       |                       |
| Section 289                                         |         |                                                                               |                       |                       |                       |                       |                       |                       |                       |
| Autographa californica nucleopolyhedrovirus NC 0... | (22177) | <a href="#">22177</a>                                                         | <a href="#">22187</a> | <a href="#">22198</a> | <a href="#">22209</a> | <a href="#">22220</a> | <a href="#">22231</a> | <a href="#">22242</a> | <a href="#">22253</a> |
|                                                     | (22177) | GTGTTTCACAGAATATAAGATATATAATAAATATGGACGACTCTGTTGCCAGCATGTGCGTAGACAACGCGTTTGCG |                       |                       |                       |                       |                       |                       |                       |
|                                                     | (1)     | -----                                                                         |                       |                       |                       |                       |                       |                       |                       |
| Section 290                                         |         |                                                                               |                       |                       |                       |                       |                       |                       |                       |
| Autographa californica nucleopolyhedrovirus NC 0... | (22254) | <a href="#">22254</a>                                                         | <a href="#">22264</a> | <a href="#">22275</a> | <a href="#">22286</a> | <a href="#">22297</a> | <a href="#">22308</a> | <a href="#">22319</a> | <a href="#">22330</a> |
|                                                     | (22254) | TACACTACTGACGATTTATTGAAAAATATTCTTTTAGTCATTCCAAATGCGCCCCCTTTCAAGCTACAAAATTACAC |                       |                       |                       |                       |                       |                       |                       |
|                                                     | (1)     | -----                                                                         |                       |                       |                       |                       |                       |                       |                       |
| Section 291                                         |         |                                                                               |                       |                       |                       |                       |                       |                       |                       |
| Autographa californica nucleopolyhedrovirus NC 0... | (22331) | <a href="#">22331</a>                                                         | <a href="#">22341</a> | <a href="#">22352</a> | <a href="#">22363</a> | <a href="#">22374</a> | <a href="#">22385</a> | <a href="#">22396</a> | <a href="#">22407</a> |
|                                                     | (22331) | CGTTTTGAAGCGGTTGAGCAACGGGTTTATCGACAAGTATGTGGACGTGTGCTCTATCAGCGAGTTGCAAAAGTTTA |                       |                       |                       |                       |                       |                       |                       |
|                                                     | (1)     | -----                                                                         |                       |                       |                       |                       |                       |                       |                       |
| Section 292                                         |         |                                                                               |                       |                       |                       |                       |                       |                       |                       |
| Autographa californica nucleopolyhedrovirus NC 0... | (22408) | <a href="#">22408</a>                                                         | <a href="#">22418</a> | <a href="#">22429</a> | <a href="#">22440</a> | <a href="#">22451</a> | <a href="#">22462</a> | <a href="#">22473</a> | <a href="#">22484</a> |
|                                                     | (22408) | ATTTTAAGATAGATCGGCTAACCAACTACATATCAAACATTTTCGAGTACGAGTTTGTAGTTTTAGAACACGATTTG |                       |                       |                       |                       |                       |                       |                       |
|                                                     | (1)     | -----                                                                         |                       |                       |                       |                       |                       |                       |                       |
| Section 293                                         |         |                                                                               |                       |                       |                       |                       |                       |                       |                       |
| Autographa californica nucleopolyhedrovirus NC 0... | (22485) | <a href="#">22485</a>                                                         | <a href="#">22495</a> | <a href="#">22506</a> | <a href="#">22517</a> | <a href="#">22528</a> | <a href="#">22539</a> | <a href="#">22550</a> | <a href="#">22561</a> |
|                                                     | (22485) | TCCACAGTGCACGTCATTAACGCCGAAACAAAAACCAAACCTGGGCCATATAAACGTGTGCTAAACCAAACGACGC  |                       |                       |                       |                       |                       |                       |                       |
|                                                     | (1)     | -----                                                                         |                       |                       |                       |                       |                       |                       |                       |
| Section 294                                         |         |                                                                               |                       |                       |                       |                       |                       |                       |                       |
| Autographa californica nucleopolyhedrovirus NC 0... | (22562) | <a href="#">22562</a>                                                         | <a href="#">22572</a> | <a href="#">22583</a> | <a href="#">22594</a> | <a href="#">22605</a> | <a href="#">22616</a> | <a href="#">22627</a> | <a href="#">22638</a> |
|                                                     | (22562) | AAACGTGCTCATTTTGACCGTAACTTTAACGAGCTAAAATGAACGAGGACACGCCCCCGTTTTATTTTATCAGCGTG |                       |                       |                       |                       |                       |                       |                       |
|                                                     | (1)     | -----                                                                         |                       |                       |                       |                       |                       |                       |                       |

## SARS-CoV-2 &amp; Autographa californica nucleopolyhedrovirus.apr

|                                                     |         |                                                                                 |                       |                       |                       |                       |                       |                       |
|-----------------------------------------------------|---------|---------------------------------------------------------------------------------|-----------------------|-----------------------|-----------------------|-----------------------|-----------------------|-----------------------|
|                                                     |         | Section 295                                                                     |                       |                       |                       |                       |                       |                       |
| Autographa californica nucleopolyhedrovirus NC 0... | (22639) | <a href="#">22639</a>                                                           | <a href="#">22649</a> | <a href="#">22660</a> | <a href="#">22671</a> | <a href="#">22682</a> | <a href="#">22693</a> | <a href="#">22704</a> |
|                                                     | (22639) | TGTGACAACCTTTCGCGACAACACCGCCGAACACGTATTCGACATGTTAATAGAAAGACATAGTTCGTTTGAAAATTA  |                       |                       |                       |                       |                       |                       |
|                                                     | (1)     | -----                                                                           |                       |                       |                       |                       |                       |                       |
|                                                     |         | Section 296                                                                     |                       |                       |                       |                       |                       |                       |
| Autographa californica nucleopolyhedrovirus NC 0... | (22716) | <a href="#">22716</a>                                                           | <a href="#">22726</a> | <a href="#">22737</a> | <a href="#">22748</a> | <a href="#">22759</a> | <a href="#">22770</a> | <a href="#">22781</a> |
|                                                     | (22716) | TCCCATTTGAAAACACGGCGTTTATTAAACAGCTTGATCGTTAACGGGTTTAAATACAATCAAGTTGACGATCACGTTG |                       |                       |                       |                       |                       |                       |
|                                                     | (1)     | -----                                                                           |                       |                       |                       |                       |                       |                       |
|                                                     |         | Section 297                                                                     |                       |                       |                       |                       |                       |                       |
| Autographa californica nucleopolyhedrovirus NC 0... | (22793) | <a href="#">22793</a>                                                           | <a href="#">22803</a> | <a href="#">22814</a> | <a href="#">22825</a> | <a href="#">22836</a> | <a href="#">22847</a> | <a href="#">22858</a> |
|                                                     | (22793) | TGTGCGAGTATTGCGAAGCAGAAATAAAAAATTGGTCCGAAGACGAGTGTATTGAATATGCACACGTAACCTTGTCG   |                       |                       |                       |                       |                       |                       |
|                                                     | (1)     | -----                                                                           |                       |                       |                       |                       |                       |                       |
|                                                     |         | Section 298                                                                     |                       |                       |                       |                       |                       |                       |
| Autographa californica nucleopolyhedrovirus NC 0... | (22870) | <a href="#">22870</a>                                                           | <a href="#">22880</a> | <a href="#">22891</a> | <a href="#">22902</a> | <a href="#">22913</a> | <a href="#">22924</a> | <a href="#">22935</a> |
|                                                     | (22870) | CCGTATTGCGCGTATGCTAACAAAGATCGCCGAGCGTGAATCGTTTGGCGACAACATTACCATCAACGCTGTACTAGT  |                       |                       |                       |                       |                       |                       |
|                                                     | (1)     | -----                                                                           |                       |                       |                       |                       |                       |                       |
|                                                     |         | Section 299                                                                     |                       |                       |                       |                       |                       |                       |
| Autographa californica nucleopolyhedrovirus NC 0... | (22947) | <a href="#">22947</a>                                                           | <a href="#">22957</a> | <a href="#">22968</a> | <a href="#">22979</a> | <a href="#">22990</a> | <a href="#">23001</a> | <a href="#">23012</a> |
|                                                     | (22947) | GAAAGAAGGCAAACCCAAGTGTGTGTACAGATGCATGTCCAATTTACAGTCGCGTATGGATACGTTTGTTAACTTTT   |                       |                       |                       |                       |                       |                       |
|                                                     | (1)     | -----                                                                           |                       |                       |                       |                       |                       |                       |
|                                                     |         | Section 300                                                                     |                       |                       |                       |                       |                       |                       |
| Autographa californica nucleopolyhedrovirus NC 0... | (23024) | <a href="#">23024</a>                                                           | <a href="#">23034</a> | <a href="#">23045</a> | <a href="#">23056</a> | <a href="#">23067</a> | <a href="#">23078</a> | <a href="#">23089</a> |
|                                                     | (23024) | GGCCTGCCGCATTGCGTGACATGATTACAAACATTGCGGAAGCGGGACTTTTTTACACGGGTCGCGGAGACGAAACT   |                       |                       |                       |                       |                       |                       |
|                                                     | (1)     | -----                                                                           |                       |                       |                       |                       |                       |                       |
|                                                     |         | Section 301                                                                     |                       |                       |                       |                       |                       |                       |
| Autographa californica nucleopolyhedrovirus NC 0... | (23101) | <a href="#">23101</a>                                                           | <a href="#">23111</a> | <a href="#">23122</a> | <a href="#">23133</a> | <a href="#">23144</a> | <a href="#">23155</a> | <a href="#">23166</a> |
|                                                     | (23101) | GTGTGTTTCTTTTGC GACTGTTGCGTACGTGATTGGCATACTAATGAAGACACCTGGCAGCGACACGCCGCCGAAAA  |                       |                       |                       |                       |                       |                       |
|                                                     | (1)     | -----                                                                           |                       |                       |                       |                       |                       |                       |

## SARS-CoV-2 &amp; Autographa californica nucleopolyhedrovirus.apr

|                                                     |         |                                                                                  |                       |                       |                       |                       |                       |                       |                       |
|-----------------------------------------------------|---------|----------------------------------------------------------------------------------|-----------------------|-----------------------|-----------------------|-----------------------|-----------------------|-----------------------|-----------------------|
|                                                     |         | Section 302                                                                      |                       |                       |                       |                       |                       |                       |                       |
| Autographa californica nucleopolyhedrovirus NC 0... | (23178) | <a href="#">23178</a>                                                            | <a href="#">23188</a> | <a href="#">23199</a> | <a href="#">23210</a> | <a href="#">23221</a> | <a href="#">23232</a> | <a href="#">23243</a> | <a href="#">23254</a> |
|                                                     | (23178) | CCCCGAATGTTATTTTGTATTGTCGGTGAAAGGTAAAGAATTTTGTCAAAACTCAATTACTGTCACTCACGTTGATA    |                       |                       |                       |                       |                       |                       |                       |
|                                                     | (1)     | -----                                                                            |                       |                       |                       |                       |                       |                       |                       |
|                                                     |         | Section 303                                                                      |                       |                       |                       |                       |                       |                       |                       |
| Autographa californica nucleopolyhedrovirus NC 0... | (23255) | <a href="#">23255</a>                                                            | <a href="#">23265</a> | <a href="#">23276</a> | <a href="#">23287</a> | <a href="#">23298</a> | <a href="#">23309</a> | <a href="#">23320</a> | <a href="#">23331</a> |
|                                                     | (23255) | AACGTGACGACGACAATTTAAACGAAAACGCCGACGACATTGAGGAAAAATATGAATGCAAAGTCTGTCTCGAACGC    |                       |                       |                       |                       |                       |                       |                       |
|                                                     | (1)     | -----                                                                            |                       |                       |                       |                       |                       |                       |                       |
|                                                     |         | Section 304                                                                      |                       |                       |                       |                       |                       |                       |                       |
| Autographa californica nucleopolyhedrovirus NC 0... | (23332) | <a href="#">23332</a>                                                            | <a href="#">23342</a> | <a href="#">23353</a> | <a href="#">23364</a> | <a href="#">23375</a> | <a href="#">23386</a> | <a href="#">23397</a> | <a href="#">23408</a> |
|                                                     | (23332) | CAACGCGACGCCGTGCTTATGCCGTGTCGGCATTTTTGCGTTTGC GTTCAGTGTTATTTTGGATTAGATCAAAAGTG   |                       |                       |                       |                       |                       |                       |                       |
|                                                     | (1)     | -----                                                                            |                       |                       |                       |                       |                       |                       |                       |
|                                                     |         | Section 305                                                                      |                       |                       |                       |                       |                       |                       |                       |
| Autographa californica nucleopolyhedrovirus NC 0... | (23409) | <a href="#">23409</a>                                                            | <a href="#">23419</a> | <a href="#">23430</a> | <a href="#">23441</a> | <a href="#">23452</a> | <a href="#">23463</a> | <a href="#">23474</a> | <a href="#">23485</a> |
|                                                     | (23409) | TCCGACGTGTCGTGTCAGGACGTCACCGATTTTATAAAAAATATTTGTGGTGTAATAAAATGGTGTTCAACGTGTACTAC |                       |                       |                       |                       |                       |                       |                       |
|                                                     | (1)     | -----                                                                            |                       |                       |                       |                       |                       |                       |                       |
|                                                     |         | Section 306                                                                      |                       |                       |                       |                       |                       |                       |                       |
| Autographa californica nucleopolyhedrovirus NC 0... | (23486) | <a href="#">23486</a>                                                            | <a href="#">23496</a> | <a href="#">23507</a> | <a href="#">23518</a> | <a href="#">23529</a> | <a href="#">23540</a> | <a href="#">23551</a> | <a href="#">23562</a> |
|                                                     | (23486) | AACGGCTATTATGTGGAAAAAAATTCTCCAAGGAGTTTTTAATTCATATTGCGCCTGATTGAAAAACAGCGTCGA      |                       |                       |                       |                       |                       |                       |                       |
|                                                     | (1)     | -----                                                                            |                       |                       |                       |                       |                       |                       |                       |
|                                                     |         | Section 307                                                                      |                       |                       |                       |                       |                       |                       |                       |
| Autographa californica nucleopolyhedrovirus NC 0... | (23563) | <a href="#">23563</a>                                                            | <a href="#">23573</a> | <a href="#">23584</a> | <a href="#">23595</a> | <a href="#">23606</a> | <a href="#">23617</a> | <a href="#">23628</a> | <a href="#">23639</a> |
|                                                     | (23563) | CTGGAACGGCAGCACGCGCAAACAGCTGCGCGTTCTAGACAAGCGCGCCTACAGGCAGGTGTTGCACTGCAACGGCA    |                       |                       |                       |                       |                       |                       |                       |
|                                                     | (1)     | -----                                                                            |                       |                       |                       |                       |                       |                       |                       |
|                                                     |         | Section 308                                                                      |                       |                       |                       |                       |                       |                       |                       |
| Autographa californica nucleopolyhedrovirus NC 0... | (23640) | <a href="#">23640</a>                                                            | <a href="#">23650</a> | <a href="#">23661</a> | <a href="#">23672</a> | <a href="#">23683</a> | <a href="#">23694</a> | <a href="#">23705</a> | <a href="#">23716</a> |
|                                                     | (23640) | GATACTACTGGCCCGATGGCACAAAGTTTGTCTCTCATCCGTACAACAAATCTATTCGCACGCACAGCGCAACAGTC    |                       |                       |                       |                       |                       |                       |                       |
|                                                     | (1)     | -----                                                                            |                       |                       |                       |                       |                       |                       |                       |

## SARS-CoV-2 &amp; Autographa californica nucleopolyhedrovirus.apr

|                                                     |         |                                                                               |                       |                       |                       |                       |                       |                       |                       |
|-----------------------------------------------------|---------|-------------------------------------------------------------------------------|-----------------------|-----------------------|-----------------------|-----------------------|-----------------------|-----------------------|-----------------------|
|                                                     |         | Section 309                                                                   |                       |                       |                       |                       |                       |                       |                       |
| Autographa californica nucleopolyhedrovirus NC 0... | (23717) | <a href="#">23717</a>                                                         | <a href="#">23727</a> | <a href="#">23738</a> | <a href="#">23749</a> | <a href="#">23760</a> | <a href="#">23771</a> | <a href="#">23782</a> | <a href="#">23793</a> |
|                                                     | (23717) | AAACGGACCGACAGCTCGCATCGATTAAAAAGCCACGTGGTCGACAAACGACCGCGCCGCTCTTTAGATTCTCCTCG |                       |                       |                       |                       |                       |                       |                       |
|                                                     | (1)     | -----                                                                         |                       |                       |                       |                       |                       |                       |                       |
|                                                     |         | Section 310                                                                   |                       |                       |                       |                       |                       |                       |                       |
| Autographa californica nucleopolyhedrovirus NC 0... | (23794) | <a href="#">23794</a>                                                         | <a href="#">23804</a> | <a href="#">23815</a> | <a href="#">23826</a> | <a href="#">23837</a> | <a href="#">23848</a> | <a href="#">23859</a> | <a href="#">23870</a> |
|                                                     | (23794) | CTTGGACGGATATGTTTTGGCATCGTCGCCATACCACACAGCGACTGGAATGAAGAACTAAAGCTGTACGCCAGA   |                       |                       |                       |                       |                       |                       |                       |
|                                                     | (1)     | -----                                                                         |                       |                       |                       |                       |                       |                       |                       |
|                                                     |         | Section 311                                                                   |                       |                       |                       |                       |                       |                       |                       |
| Autographa californica nucleopolyhedrovirus NC 0... | (23871) | <a href="#">23871</a>                                                         | <a href="#">23881</a> | <a href="#">23892</a> | <a href="#">23903</a> | <a href="#">23914</a> | <a href="#">23925</a> | <a href="#">23936</a> | <a href="#">23947</a> |
|                                                     | (23871) | GCCACGGCTACGACGACTACGACGACAATTTAGAAGATGGCGAAATCGACGAACGTGACTCTTTAAAAAGTTTAAAT |                       |                       |                       |                       |                       |                       |                       |
|                                                     | (1)     | -----                                                                         |                       |                       |                       |                       |                       |                       |                       |
|                                                     |         | Section 312                                                                   |                       |                       |                       |                       |                       |                       |                       |
| Autographa californica nucleopolyhedrovirus NC 0... | (23948) | <a href="#">23948</a>                                                         | <a href="#">23958</a> | <a href="#">23969</a> | <a href="#">23980</a> | <a href="#">23991</a> | <a href="#">24002</a> | <a href="#">24013</a> | <a href="#">24024</a> |
|                                                     | (23948) | AATCATCTAGACGACTTGAATGTATTAGAAAAACAATAAAACATGTATTAAAAATAATAATAAAACTATATTTT    |                       |                       |                       |                       |                       |                       |                       |
|                                                     | (1)     | -----                                                                         |                       |                       |                       |                       |                       |                       |                       |
|                                                     |         | Section 313                                                                   |                       |                       |                       |                       |                       |                       |                       |
| Autographa californica nucleopolyhedrovirus NC 0... | (24025) | <a href="#">24025</a>                                                         | <a href="#">24035</a> | <a href="#">24046</a> | <a href="#">24057</a> | <a href="#">24068</a> | <a href="#">24079</a> | <a href="#">24090</a> | <a href="#">24101</a> |
|                                                     | (24025) | GTAATATATAATGTATTTTATTTAAAAATTGTCTATTCCGTAGTTGAGAAAGTTTGTCTTGACTTCATAACTCTCT  |                       |                       |                       |                       |                       |                       |                       |
|                                                     | (1)     | -----                                                                         |                       |                       |                       |                       |                       |                       |                       |
|                                                     |         | Section 314                                                                   |                       |                       |                       |                       |                       |                       |                       |
| Autographa californica nucleopolyhedrovirus NC 0... | (24102) | <a href="#">24102</a>                                                         | <a href="#">24112</a> | <a href="#">24123</a> | <a href="#">24134</a> | <a href="#">24145</a> | <a href="#">24156</a> | <a href="#">24167</a> | <a href="#">24178</a> |
|                                                     | (24102) | TCTCCATATTCTGCAGCTCGTTTACGTTTTTTGTGACGCTTTTAATTTTCTCAAATGCTGGCTGTCAATAGTTATT  |                       |                       |                       |                       |                       |                       |                       |
|                                                     | (1)     | -----                                                                         |                       |                       |                       |                       |                       |                       |                       |
|                                                     |         | Section 315                                                                   |                       |                       |                       |                       |                       |                       |                       |
| Autographa californica nucleopolyhedrovirus NC 0... | (24179) | <a href="#">24179</a>                                                         | <a href="#">24189</a> | <a href="#">24200</a> | <a href="#">24211</a> | <a href="#">24222</a> | <a href="#">24233</a> | <a href="#">24244</a> | <a href="#">24255</a> |
|                                                     | (24179) | TTTTGCTTTTGTCTATTAATTTCTTCCAATTGAGATTTTAAATCTCGCTGAGATTGAGATGCGTTGTAATTCCTTGA |                       |                       |                       |                       |                       |                       |                       |
|                                                     | (1)     | -----                                                                         |                       |                       |                       |                       |                       |                       |                       |

## SARS-CoV-2 &amp; Autographa californica nucleopolyhedrovirus.apr

|                                                     |         |                                                                                |                       |                       |                       |                       |                       |                       |                       |
|-----------------------------------------------------|---------|--------------------------------------------------------------------------------|-----------------------|-----------------------|-----------------------|-----------------------|-----------------------|-----------------------|-----------------------|
| Section 316                                         |         |                                                                                |                       |                       |                       |                       |                       |                       |                       |
| Autographa californica nucleopolyhedrovirus NC 0... | (24256) | <a href="#">24256</a>                                                          | <a href="#">24266</a> | <a href="#">24277</a> | <a href="#">24288</a> | <a href="#">24299</a> | <a href="#">24310</a> | <a href="#">24321</a> | <a href="#">24332</a> |
|                                                     | (24256) | GAACATCTTGAGAAAACATACAGATGAGGTAAACAGCATCTTTTATCCAAATTAGGAGTTAATTATTATTTCATTTG  |                       |                       |                       |                       |                       |                       |                       |
|                                                     | (1)     | -----                                                                          |                       |                       |                       |                       |                       |                       |                       |
| Section 317                                         |         |                                                                                |                       |                       |                       |                       |                       |                       |                       |
| Autographa californica nucleopolyhedrovirus NC 0... | (24333) | <a href="#">24333</a>                                                          | <a href="#">24343</a> | <a href="#">24354</a> | <a href="#">24365</a> | <a href="#">24376</a> | <a href="#">24387</a> | <a href="#">24398</a> | <a href="#">24409</a> |
|                                                     | (24333) | TATCGCGACCATTTGCTCGTACACATCTTCCATAAAATGGTTATTTTTATTGCGATAAGTGTGGCATTGACATTTT   |                       |                       |                       |                       |                       |                       |                       |
|                                                     | (1)     | -----                                                                          |                       |                       |                       |                       |                       |                       |                       |
| Section 318                                         |         |                                                                                |                       |                       |                       |                       |                       |                       |                       |
| Autographa californica nucleopolyhedrovirus NC 0... | (24410) | <a href="#">24410</a>                                                          | <a href="#">24420</a> | <a href="#">24431</a> | <a href="#">24442</a> | <a href="#">24453</a> | <a href="#">24464</a> | <a href="#">24475</a> | <a href="#">24486</a> |
|                                                     | (24410) | GCAAATGTCGTAGGTTAAAGGGGCAAATGGGCTGCGTGCCGATAAAAGATTCCAGTTCAACAATCCCTCTTCGCCC   |                       |                       |                       |                       |                       |                       |                       |
|                                                     | (1)     | -----                                                                          |                       |                       |                       |                       |                       |                       |                       |
| Section 319                                         |         |                                                                                |                       |                       |                       |                       |                       |                       |                       |
| Autographa californica nucleopolyhedrovirus NC 0... | (24487) | <a href="#">24487</a>                                                          | <a href="#">24497</a> | <a href="#">24508</a> | <a href="#">24519</a> | <a href="#">24530</a> | <a href="#">24541</a> | <a href="#">24552</a> | <a href="#">24563</a> |
|                                                     | (24487) | CCGTTTAACTTGAAAATGGCGCTACACGTTTCTACGCTATCGTGTTCTGTGAGTGGCGCACGGTTCGACCAGTAT    |                       |                       |                       |                       |                       |                       |                       |
|                                                     | (1)     | -----                                                                          |                       |                       |                       |                       |                       |                       |                       |
| Section 320                                         |         |                                                                                |                       |                       |                       |                       |                       |                       |                       |
| Autographa californica nucleopolyhedrovirus NC 0... | (24564) | <a href="#">24564</a>                                                          | <a href="#">24574</a> | <a href="#">24585</a> | <a href="#">24596</a> | <a href="#">24607</a> | <a href="#">24618</a> | <a href="#">24629</a> | <a href="#">24640</a> |
|                                                     | (24564) | CATCTTGTGATATGCGGTTTTGACATTCATGTGCAACGGAATAACTTGCGGGTCATCGCATTCGTCGGAATTAAGCT  |                       |                       |                       |                       |                       |                       |                       |
|                                                     | (1)     | -----                                                                          |                       |                       |                       |                       |                       |                       |                       |
| Section 321                                         |         |                                                                                |                       |                       |                       |                       |                       |                       |                       |
| Autographa californica nucleopolyhedrovirus NC 0... | (24641) | <a href="#">24641</a>                                                          | <a href="#">24651</a> | <a href="#">24662</a> | <a href="#">24673</a> | <a href="#">24684</a> | <a href="#">24695</a> | <a href="#">24706</a> | <a href="#">24717</a> |
|                                                     | (24641) | TTAAATGGCGTCCGTATGCTTTCCAAAGTTTTTCGTCTGTCGAACCGCGGCACTGCTTGCAAGTCGACGCGGGGAAAC |                       |                       |                       |                       |                       |                       |                       |
|                                                     | (1)     | -----                                                                          |                       |                       |                       |                       |                       |                       |                       |
| Section 322                                         |         |                                                                                |                       |                       |                       |                       |                       |                       |                       |
| Autographa californica nucleopolyhedrovirus NC 0... | (24718) | <a href="#">24718</a>                                                          | <a href="#">24728</a> | <a href="#">24739</a> | <a href="#">24750</a> | <a href="#">24761</a> | <a href="#">24772</a> | <a href="#">24783</a> | <a href="#">24794</a> |
|                                                     | (24718) | GGCGCTCTGTACAAAACGCCTAAATTCAAAACTGATTGCATTGTTGCAGCTCTGTCCAATCGACGCGATTTTTGTA   |                       |                       |                       |                       |                       |                       |                       |
|                                                     | (1)     | -----                                                                          |                       |                       |                       |                       |                       |                       |                       |

## SARS-CoV-2 &amp; Autographa californica nucleopolyhedrovirus.apr

|                                                     |         |                                                                               |                       |                       |                       |                       |                       |                       |                       |
|-----------------------------------------------------|---------|-------------------------------------------------------------------------------|-----------------------|-----------------------|-----------------------|-----------------------|-----------------------|-----------------------|-----------------------|
| Section 323                                         |         |                                                                               |                       |                       |                       |                       |                       |                       |                       |
| Autographa californica nucleopolyhedrovirus NC 0... | (24795) | <a href="#">24795</a>                                                         | <a href="#">24805</a> | <a href="#">24816</a> | <a href="#">24827</a> | <a href="#">24838</a> | <a href="#">24849</a> | <a href="#">24860</a> | <a href="#">24871</a> |
|                                                     | (24795) | ATTTTGAAACAGCATCAGGTTGAACGCCGCGCTGGCGCGCACGTTTGTAATCACTGTGTAATTGATCAGCTTGTGCC |                       |                       |                       |                       |                       |                       |                       |
|                                                     | (1)     | -----                                                                         |                       |                       |                       |                       |                       |                       |                       |
| Section 324                                         |         |                                                                               |                       |                       |                       |                       |                       |                       |                       |
| Autographa californica nucleopolyhedrovirus NC 0... | (24872) | <a href="#">24872</a>                                                         | <a href="#">24882</a> | <a href="#">24893</a> | <a href="#">24904</a> | <a href="#">24915</a> | <a href="#">24926</a> | <a href="#">24937</a> | <a href="#">24948</a> |
|                                                     | (24872) | AATACTGGGCATTGAAATTTTCTTCAAACCTCATTCTAAACTCTGGATGCGCAAACATGTGTCTAATGTAGTACGCG |                       |                       |                       |                       |                       |                       |                       |
|                                                     | (1)     | -----                                                                         |                       |                       |                       |                       |                       |                       |                       |
| Section 325                                         |         |                                                                               |                       |                       |                       |                       |                       |                       |                       |
| Autographa californica nucleopolyhedrovirus NC 0... | (24949) | <a href="#">24949</a>                                                         | <a href="#">24959</a> | <a href="#">24970</a> | <a href="#">24981</a> | <a href="#">24992</a> | <a href="#">25003</a> | <a href="#">25014</a> | <a href="#">25025</a> |
|                                                     | (24949) | GGCGGGGCGTTGAACGCAGTCCATTTGTCAATACACTTCCAGTCTGAATGTAACGTGTTACCAAACCGGGATATTC  |                       |                       |                       |                       |                       |                       |                       |
|                                                     | (1)     | -----                                                                         |                       |                       |                       |                       |                       |                       |                       |
| Section 326                                         |         |                                                                               |                       |                       |                       |                       |                       |                       |                       |
| Autographa californica nucleopolyhedrovirus NC 0... | (25026) | <a href="#">25026</a>                                                         | <a href="#">25036</a> | <a href="#">25047</a> | <a href="#">25058</a> | <a href="#">25069</a> | <a href="#">25080</a> | <a href="#">25091</a> | <a href="#">25102</a> |
|                                                     | (25026) | GTCAAACACGAGCATGTGATCCGACCACGGTATGCTGTGGGCGATCAATTTTAGTTCTTGACGCGGCCTTCGCGTA  |                       |                       |                       |                       |                       |                       |                       |
|                                                     | (1)     | -----                                                                         |                       |                       |                       |                       |                       |                       |                       |
| Section 327                                         |         |                                                                               |                       |                       |                       |                       |                       |                       |                       |
| Autographa californica nucleopolyhedrovirus NC 0... | (25103) | <a href="#">25103</a>                                                         | <a href="#">25113</a> | <a href="#">25124</a> | <a href="#">25135</a> | <a href="#">25146</a> | <a href="#">25157</a> | <a href="#">25168</a> | <a href="#">25179</a> |
|                                                     | (25103) | AGCAATACAAAATGAGCGCGTCGCTGATCTTGACACAGTCTTGATGTACGCGGACAAATTAACGTTTTCCATACAG  |                       |                       |                       |                       |                       |                       |                       |
|                                                     | (1)     | -----                                                                         |                       |                       |                       |                       |                       |                       |                       |
| Section 328                                         |         |                                                                               |                       |                       |                       |                       |                       |                       |                       |
| Autographa californica nucleopolyhedrovirus NC 0... | (25180) | <a href="#">25180</a>                                                         | <a href="#">25190</a> | <a href="#">25201</a> | <a href="#">25212</a> | <a href="#">25223</a> | <a href="#">25234</a> | <a href="#">25245</a> | <a href="#">25256</a> |
|                                                     | (25180) | CTCACATTGTTTATTAGCGCCGTGTTCAAGTGTGTTGATTTGGACACATAATCGTAGTTGATGTACTGTTTAATGGG |                       |                       |                       |                       |                       |                       |                       |
|                                                     | (1)     | -----                                                                         |                       |                       |                       |                       |                       |                       |                       |
| Section 329                                         |         |                                                                               |                       |                       |                       |                       |                       |                       |                       |
| Autographa californica nucleopolyhedrovirus NC 0... | (25257) | <a href="#">25257</a>                                                         | <a href="#">25267</a> | <a href="#">25278</a> | <a href="#">25289</a> | <a href="#">25300</a> | <a href="#">25311</a> | <a href="#">25322</a> | <a href="#">25333</a> |
|                                                     | (25257) | TTCTTGAAACCATTCTTTTAGTAGTATGTGACTGGCCACTATGCGTTTCCAATTTAATTTGTGTGCGTATTTTGTCT |                       |                       |                       |                       |                       |                       |                       |
|                                                     | (1)     | -----                                                                         |                       |                       |                       |                       |                       |                       |                       |

## SARS-CoV-2 &amp; Autographa californica nucleopolyhedrovirus.apr

|                                                     |         |                                                                                |                       |                       |                       |                       |                       |                       |                       |
|-----------------------------------------------------|---------|--------------------------------------------------------------------------------|-----------------------|-----------------------|-----------------------|-----------------------|-----------------------|-----------------------|-----------------------|
|                                                     |         | Section 330                                                                    |                       |                       |                       |                       |                       |                       |                       |
| Autographa californica nucleopolyhedrovirus NC 0... | (25334) | <a href="#">25334</a>                                                          | <a href="#">25344</a> | <a href="#">25355</a> | <a href="#">25366</a> | <a href="#">25377</a> | <a href="#">25388</a> | <a href="#">25399</a> | <a href="#">25410</a> |
|                                                     | (25334) | GCACCGACAACGAGAGGTTATTGTAAATTTTGGATATTTCTTCCATGTCCAACAAGTCCCCAAACGCGAGTATAAAA  |                       |                       |                       |                       |                       |                       |                       |
|                                                     | (1)     | -----                                                                          |                       |                       |                       |                       |                       |                       |                       |
|                                                     |         | Section 331                                                                    |                       |                       |                       |                       |                       |                       |                       |
| Autographa californica nucleopolyhedrovirus NC 0... | (25411) | <a href="#">25411</a>                                                          | <a href="#">25421</a> | <a href="#">25432</a> | <a href="#">25443</a> | <a href="#">25454</a> | <a href="#">25465</a> | <a href="#">25476</a> | <a href="#">25487</a> |
|                                                     | (25411) | TCTTGCGTCAAAAATTTTGTCTCAGACACCAACGACCAGATCAAATGTGATTTAACCTGTTGGCGATTGTTATCGA   |                       |                       |                       |                       |                       |                       |                       |
|                                                     | (1)     | -----                                                                          |                       |                       |                       |                       |                       |                       |                       |
|                                                     |         | Section 332                                                                    |                       |                       |                       |                       |                       |                       |                       |
| Autographa californica nucleopolyhedrovirus NC 0... | (25488) | <a href="#">25488</a>                                                          | <a href="#">25498</a> | <a href="#">25509</a> | <a href="#">25520</a> | <a href="#">25531</a> | <a href="#">25542</a> | <a href="#">25553</a> | <a href="#">25564</a> |
|                                                     | (25488) | CAACGGCGAAATTGAAATAATTTTCCAATCCAACCTGTTGCGAAACACGTGAATAAAATCGACGCGTCCGTAACATT  |                       |                       |                       |                       |                       |                       |                       |
|                                                     | (1)     | -----                                                                          |                       |                       |                       |                       |                       |                       |                       |
|                                                     |         | Section 333                                                                    |                       |                       |                       |                       |                       |                       |                       |
| Autographa californica nucleopolyhedrovirus NC 0... | (25565) | <a href="#">25565</a>                                                          | <a href="#">25575</a> | <a href="#">25586</a> | <a href="#">25597</a> | <a href="#">25608</a> | <a href="#">25619</a> | <a href="#">25630</a> | <a href="#">25641</a> |
|                                                     | (25565) | CGCGCGATATGCGCTTCCAAAACGTGTCATCTTGCAAATTAAGCAAATAGACACGATTGTTGGGAGATTGACGGCC   |                       |                       |                       |                       |                       |                       |                       |
|                                                     | (1)     | -----                                                                          |                       |                       |                       |                       |                       |                       |                       |
|                                                     |         | Section 334                                                                    |                       |                       |                       |                       |                       |                       |                       |
| Autographa californica nucleopolyhedrovirus NC 0... | (25642) | <a href="#">25642</a>                                                          | <a href="#">25652</a> | <a href="#">25663</a> | <a href="#">25674</a> | <a href="#">25685</a> | <a href="#">25696</a> | <a href="#">25707</a> | <a href="#">25718</a> |
|                                                     | (25642) | AATTCAATTATTTTTATATATTCTTTTTGCTTTAAAGCGCGTTGTAGCACTTGGGTTGGAGCCATGTCGACTGAAGC  |                       |                       |                       |                       |                       |                       |                       |
|                                                     | (1)     | -----                                                                          |                       |                       |                       |                       |                       |                       |                       |
|                                                     |         | Section 335                                                                    |                       |                       |                       |                       |                       |                       |                       |
| Autographa californica nucleopolyhedrovirus NC 0... | (25719) | <a href="#">25719</a>                                                          | <a href="#">25729</a> | <a href="#">25740</a> | <a href="#">25751</a> | <a href="#">25762</a> | <a href="#">25773</a> | <a href="#">25784</a> | <a href="#">25795</a> |
|                                                     | (25719) | TCCACGCTGTTTGAAGCAAGGTGACCGTTTTGGTCGGCATGTTCAAACGTCGATTACATGTTTGCTTTGCATCAAAA  |                       |                       |                       |                       |                       |                       |                       |
|                                                     | (1)     | -----                                                                          |                       |                       |                       |                       |                       |                       |                       |
|                                                     |         | Section 336                                                                    |                       |                       |                       |                       |                       |                       |                       |
| Autographa californica nucleopolyhedrovirus NC 0... | (25796) | <a href="#">25796</a>                                                          | <a href="#">25806</a> | <a href="#">25817</a> | <a href="#">25828</a> | <a href="#">25839</a> | <a href="#">25850</a> | <a href="#">25861</a> | <a href="#">25872</a> |
|                                                     | (25796) | TGGCGTAATTAATTAAGAAACAACATGAAAGCCATCTGCATCATTAGCGGCGATGTTTCATGGAAAAATTTATTTTCA |                       |                       |                       |                       |                       |                       |                       |
|                                                     | (1)     | -----                                                                          |                       |                       |                       |                       |                       |                       |                       |



## SARS-CoV-2 &amp; Autographa californica nucleopolyhedrovirus.apr

|                                                     |         |                                                                                |                       |                       |                       |                       |                       |                       |                       |
|-----------------------------------------------------|---------|--------------------------------------------------------------------------------|-----------------------|-----------------------|-----------------------|-----------------------|-----------------------|-----------------------|-----------------------|
|                                                     |         | Section 337                                                                    |                       |                       |                       |                       |                       |                       |                       |
| Autographa californica nucleopolyhedrovirus NC 0... | (25873) | <a href="#">25873</a>                                                          | <a href="#">25883</a> | <a href="#">25894</a> | <a href="#">25905</a> | <a href="#">25916</a> | <a href="#">25927</a> | <a href="#">25938</a> | <a href="#">25949</a> |
|                                                     | (25873) | ACAAGAATCAGCGAATCAACCGCTTAAATTTAGCGGCTATTTGTTAAATTTGCCTCGAGGTTTGCACGGCTTTCACG  |                       |                       |                       |                       |                       |                       |                       |
|                                                     | (1)     | -----                                                                          |                       |                       |                       |                       |                       |                       |                       |
|                                                     |         | Section 338                                                                    |                       |                       |                       |                       |                       |                       |                       |
| Autographa californica nucleopolyhedrovirus NC 0... | (25950) | <a href="#">25950</a>                                                          | <a href="#">25960</a> | <a href="#">25971</a> | <a href="#">25982</a> | <a href="#">25993</a> | <a href="#">26004</a> | <a href="#">26015</a> | <a href="#">26026</a> |
|                                                     | (25950) | TGCACGAATATGGCGACACGAGCAACGGTTGCACGTCGGCCGGTGAGCACTTTAATCCCAATGAGGACCACGGC     |                       |                       |                       |                       |                       |                       |                       |
|                                                     | (1)     | -----                                                                          |                       |                       |                       |                       |                       |                       |                       |
|                                                     |         | Section 339                                                                    |                       |                       |                       |                       |                       |                       |                       |
| Autographa californica nucleopolyhedrovirus NC 0... | (26027) | <a href="#">26027</a>                                                          | <a href="#">26037</a> | <a href="#">26048</a> | <a href="#">26059</a> | <a href="#">26070</a> | <a href="#">26081</a> | <a href="#">26092</a> | <a href="#">26103</a> |
|                                                     | (26027) | GCTCCCGATGCTGAAATTAGGCATGTTGGCGACTTGGGCAACATAAAATCGGCTGGCTACAATTCACCTGACCGAAGT |                       |                       |                       |                       |                       |                       |                       |
|                                                     | (1)     | -----                                                                          |                       |                       |                       |                       |                       |                       |                       |
|                                                     |         | Section 340                                                                    |                       |                       |                       |                       |                       |                       |                       |
| Autographa californica nucleopolyhedrovirus NC 0... | (26104) | <a href="#">26104</a>                                                          | <a href="#">26114</a> | <a href="#">26125</a> | <a href="#">26136</a> | <a href="#">26147</a> | <a href="#">26158</a> | <a href="#">26169</a> | <a href="#">26180</a> |
|                                                     | (26104) | AAACATGATGGACAACGTTATGTCTCTATATGGCCCGCATAATATTATCGGAAGAAGTTTGGTCGTGCACACGGACA  |                       |                       |                       |                       |                       |                       |                       |
|                                                     | (1)     | -----                                                                          |                       |                       |                       |                       |                       |                       |                       |
|                                                     |         | Section 341                                                                    |                       |                       |                       |                       |                       |                       |                       |
| Autographa californica nucleopolyhedrovirus NC 0... | (26181) | <a href="#">26181</a>                                                          | <a href="#">26191</a> | <a href="#">26202</a> | <a href="#">26213</a> | <a href="#">26224</a> | <a href="#">26235</a> | <a href="#">26246</a> | <a href="#">26257</a> |
|                                                     | (26181) | AAGACGATTTGGGCCTTACCGATCATCCGTTGAGCAAAACAACCGGCAATTCTGGCGGCCGTTTGGGATGCGGAATA  |                       |                       |                       |                       |                       |                       |                       |
|                                                     | (1)     | -----                                                                          |                       |                       |                       |                       |                       |                       |                       |
|                                                     |         | Section 342                                                                    |                       |                       |                       |                       |                       |                       |                       |
| Autographa californica nucleopolyhedrovirus NC 0... | (26258) | <a href="#">26258</a>                                                          | <a href="#">26268</a> | <a href="#">26279</a> | <a href="#">26290</a> | <a href="#">26301</a> | <a href="#">26312</a> | <a href="#">26323</a> | <a href="#">26334</a> |
|                                                     | (26258) | ATTGCCATATGTAAATGATGTCATCGTTCTAACTCGCTTACGAGTAGAATTCTACGTGTAAACATAATCAAGAGA    |                       |                       |                       |                       |                       |                       |                       |
|                                                     | (1)     | -----                                                                          |                       |                       |                       |                       |                       |                       |                       |
|                                                     |         | Section 343                                                                    |                       |                       |                       |                       |                       |                       |                       |
| Autographa californica nucleopolyhedrovirus NC 0... | (26335) | <a href="#">26335</a>                                                          | <a href="#">26345</a> | <a href="#">26356</a> | <a href="#">26367</a> | <a href="#">26378</a> | <a href="#">26389</a> | <a href="#">26400</a> | <a href="#">26411</a> |
|                                                     | (26335) | TGATGTCATTTGTTTTTCAAACCTGAACTCAAGAAATGATGTCATTTGTTTTTCAAACCTGAACTGGCTTTACGAGT  |                       |                       |                       |                       |                       |                       |                       |
|                                                     | (1)     | -----                                                                          |                       |                       |                       |                       |                       |                       |                       |

## SARS-CoV-2 &amp; Autographa californica nucleopolyhedrovirus.apr

|                                                     |         |                                                                               |                       |                       |                       |                       |                       |                       |                       |
|-----------------------------------------------------|---------|-------------------------------------------------------------------------------|-----------------------|-----------------------|-----------------------|-----------------------|-----------------------|-----------------------|-----------------------|
|                                                     |         | Section 344                                                                   |                       |                       |                       |                       |                       |                       |                       |
| Autographa californica nucleopolyhedrovirus NC 0... | (26412) | <a href="#">26412</a>                                                         | <a href="#">26422</a> | <a href="#">26433</a> | <a href="#">26444</a> | <a href="#">26455</a> | <a href="#">26466</a> | <a href="#">26477</a> | <a href="#">26488</a> |
|                                                     | (26412) | AGAATTCTACTTGTAACGCATGATCAAGGGATGATGTCATTTGTTTTTCAAACCGAACTCGCTTTACGAGTAGAAT  |                       |                       |                       |                       |                       |                       |                       |
|                                                     | (1)     | -----                                                                         |                       |                       |                       |                       |                       |                       |                       |
|                                                     |         | Section 345                                                                   |                       |                       |                       |                       |                       |                       |                       |
| Autographa californica nucleopolyhedrovirus NC 0... | (26489) | <a href="#">26489</a>                                                         | <a href="#">26499</a> | <a href="#">26510</a> | <a href="#">26521</a> | <a href="#">26532</a> | <a href="#">26543</a> | <a href="#">26554</a> | <a href="#">26565</a> |
|                                                     | (26489) | TCTACTTGTAACATAATCGAAAGATGATGTCATTTGTTTTTAAATTGAAGTGGCTTTACGAGTAGAATTCTAC     |                       |                       |                       |                       |                       |                       |                       |
|                                                     | (1)     | -----                                                                         |                       |                       |                       |                       |                       |                       |                       |
|                                                     |         | Section 346                                                                   |                       |                       |                       |                       |                       |                       |                       |
| Autographa californica nucleopolyhedrovirus NC 0... | (26566) | <a href="#">26566</a>                                                         | <a href="#">26576</a> | <a href="#">26587</a> | <a href="#">26598</a> | <a href="#">26609</a> | <a href="#">26620</a> | <a href="#">26631</a> | <a href="#">26642</a> |
|                                                     | (26566) | TTGTAAACACAAATCGAGAGATGATGTCATATTTGCACACGGCTCTAATTAACTCGCTTTACGAGTAAATTCTA    |                       |                       |                       |                       |                       |                       |                       |
|                                                     | (1)     | -----                                                                         |                       |                       |                       |                       |                       |                       |                       |
|                                                     |         | Section 347                                                                   |                       |                       |                       |                       |                       |                       |                       |
| Autographa californica nucleopolyhedrovirus NC 0... | (26643) | <a href="#">26643</a>                                                         | <a href="#">26653</a> | <a href="#">26664</a> | <a href="#">26675</a> | <a href="#">26686</a> | <a href="#">26697</a> | <a href="#">26708</a> | <a href="#">26719</a> |
|                                                     | (26643) | CTTGTAACGCATGATCAAGGGATGATGTATTGGATGAGTCATTTGTTTTTCAAACCTAACTCGCTTTACGAGTAGA  |                       |                       |                       |                       |                       |                       |                       |
|                                                     | (1)     | -----                                                                         |                       |                       |                       |                       |                       |                       |                       |
|                                                     |         | Section 348                                                                   |                       |                       |                       |                       |                       |                       |                       |
| Autographa californica nucleopolyhedrovirus NC 0... | (26720) | <a href="#">26720</a>                                                         | <a href="#">26730</a> | <a href="#">26741</a> | <a href="#">26752</a> | <a href="#">26763</a> | <a href="#">26774</a> | <a href="#">26785</a> | <a href="#">26796</a> |
|                                                     | (26720) | ATTCTACTTGTAACGCACGCCCAAGGGATGATGTCATTTATTTGTGCAAAGCTGATGTCATCTTTTGCACACGATTA |                       |                       |                       |                       |                       |                       |                       |
|                                                     | (1)     | -----                                                                         |                       |                       |                       |                       |                       |                       |                       |
|                                                     |         | Section 349                                                                   |                       |                       |                       |                       |                       |                       |                       |
| Autographa californica nucleopolyhedrovirus NC 0... | (26797) | <a href="#">26797</a>                                                         | <a href="#">26807</a> | <a href="#">26818</a> | <a href="#">26829</a> | <a href="#">26840</a> | <a href="#">26851</a> | <a href="#">26862</a> | <a href="#">26873</a> |
|                                                     | (26797) | TAAACACAATCAAATAATGACTCATTTGTTTTTCAAACCTGAAGTGGCTTTACGAGTAGAATTCTACTTGTAACACA |                       |                       |                       |                       |                       |                       |                       |
|                                                     | (1)     | -----                                                                         |                       |                       |                       |                       |                       |                       |                       |
|                                                     |         | Section 350                                                                   |                       |                       |                       |                       |                       |                       |                       |
| Autographa californica nucleopolyhedrovirus NC 0... | (26874) | <a href="#">26874</a>                                                         | <a href="#">26884</a> | <a href="#">26895</a> | <a href="#">26906</a> | <a href="#">26917</a> | <a href="#">26928</a> | <a href="#">26939</a> | <a href="#">26950</a> |
|                                                     | (26874) | CAATCAAGCGATGATGTCATTTTAAAAATGATGTCATTTGTTTTTCAAACCTAACTCGCTTTACGAGTAGAATTCT  |                       |                       |                       |                       |                       |                       |                       |
|                                                     | (1)     | -----                                                                         |                       |                       |                       |                       |                       |                       |                       |

## SARS-CoV-2 &amp; Autographa californica nucleopolyhedrovirus.apr

|                                                     |         |                                                                                |                       |                       |                       |                       |                       |                       |                       |
|-----------------------------------------------------|---------|--------------------------------------------------------------------------------|-----------------------|-----------------------|-----------------------|-----------------------|-----------------------|-----------------------|-----------------------|
| Section 351                                         |         |                                                                                |                       |                       |                       |                       |                       |                       |                       |
| Autographa californica nucleopolyhedrovirus NC 0... | (26951) | <a href="#">26951</a>                                                          | <a href="#">26961</a> | <a href="#">26972</a> | <a href="#">26983</a> | <a href="#">26994</a> | <a href="#">27005</a> | <a href="#">27016</a> | <a href="#">27027</a> |
|                                                     | (26951) | ACGTGTAAAACACAATCAAGGGATGATGTCATTTACTAAAATAAAATAATTATTTAAATAAAAAATGTTTTTATTGTA |                       |                       |                       |                       |                       |                       |                       |
|                                                     | (1)     | -----                                                                          |                       |                       |                       |                       |                       |                       |                       |
| Section 352                                         |         |                                                                                |                       |                       |                       |                       |                       |                       |                       |
| Autographa californica nucleopolyhedrovirus NC 0... | (27028) | <a href="#">27028</a>                                                          | <a href="#">27038</a> | <a href="#">27049</a> | <a href="#">27060</a> | <a href="#">27071</a> | <a href="#">27082</a> | <a href="#">27093</a> | <a href="#">27104</a> |
|                                                     | (27028) | AAATACACATTGATTACACGTGACATTTACGATGGCGAACAATAATTTCACTTTTTATATTAGGACACGACGTGTAT  |                       |                       |                       |                       |                       |                       |                       |
|                                                     | (1)     | -----                                                                          |                       |                       |                       |                       |                       |                       |                       |
| Section 353                                         |         |                                                                                |                       |                       |                       |                       |                       |                       |                       |
| Autographa californica nucleopolyhedrovirus NC 0... | (27105) | <a href="#">27105</a>                                                          | <a href="#">27115</a> | <a href="#">27126</a> | <a href="#">27137</a> | <a href="#">27148</a> | <a href="#">27159</a> | <a href="#">27170</a> | <a href="#">27181</a> |
|                                                     | (27105) | ATAGGAAAGCTTAAGCGTTTCAATAAAGCCATGGCGTACACGCTAAGCTTGCCAGCTTGCGGCTCTTTGAAATCTG   |                       |                       |                       |                       |                       |                       |                       |
|                                                     | (1)     | -----                                                                          |                       |                       |                       |                       |                       |                       |                       |
| Section 354                                         |         |                                                                                |                       |                       |                       |                       |                       |                       |                       |
| Autographa californica nucleopolyhedrovirus NC 0... | (27182) | <a href="#">27182</a>                                                          | <a href="#">27192</a> | <a href="#">27203</a> | <a href="#">27214</a> | <a href="#">27225</a> | <a href="#">27236</a> | <a href="#">27247</a> | <a href="#">27258</a> |
|                                                     | (27182) | TAGTTTTTCGGGGAGTACCGTCGTTCTTCAGTGCCACATACGTCAACTTGCGATCGTACACTTTATAATACGTGTTGT |                       |                       |                       |                       |                       |                       |                       |
|                                                     | (1)     | -----                                                                          |                       |                       |                       |                       |                       |                       |                       |
| Section 355                                         |         |                                                                                |                       |                       |                       |                       |                       |                       |                       |
| Autographa californica nucleopolyhedrovirus NC 0... | (27259) | <a href="#">27259</a>                                                          | <a href="#">27269</a> | <a href="#">27280</a> | <a href="#">27291</a> | <a href="#">27302</a> | <a href="#">27313</a> | <a href="#">27324</a> | <a href="#">27335</a> |
|                                                     | (27259) | AGTTATTTTTTTCCAGAAATTCCCTCATAAAGCAATCCTTGGATAAAGTTTTTGATCCGTACAGTTGGCCACACCGG  |                       |                       |                       |                       |                       |                       |                       |
|                                                     | (1)     | -----                                                                          |                       |                       |                       |                       |                       |                       |                       |
| Section 356                                         |         |                                                                                |                       |                       |                       |                       |                       |                       |                       |
| Autographa californica nucleopolyhedrovirus NC 0... | (27336) | <a href="#">27336</a>                                                          | <a href="#">27346</a> | <a href="#">27357</a> | <a href="#">27368</a> | <a href="#">27379</a> | <a href="#">27390</a> | <a href="#">27401</a> | <a href="#">27412</a> |
|                                                     | (27336) | TCCATGCACAGGTACACACACGTGATGGCGTTTTGAATGACGATGCGATTTCTGTCAACGGCAACGCGCTTGAATAT  |                       |                       |                       |                       |                       |                       |                       |
|                                                     | (1)     | -----                                                                          |                       |                       |                       |                       |                       |                       |                       |
| Section 357                                         |         |                                                                                |                       |                       |                       |                       |                       |                       |                       |
| Autographa californica nucleopolyhedrovirus NC 0... | (27413) | <a href="#">27413</a>                                                          | <a href="#">27423</a> | <a href="#">27434</a> | <a href="#">27445</a> | <a href="#">27456</a> | <a href="#">27467</a> | <a href="#">27478</a> | <a href="#">27489</a> |
|                                                     | (27413) | GGTGTCGACGTTGTCCGATTCAATGGTTCCGTAAACAGCTCCGTCTGGATTTACTGCCAAAACTGCCGGTTAATAA   |                       |                       |                       |                       |                       |                       |                       |
|                                                     | (1)     | -----                                                                          |                       |                       |                       |                       |                       |                       |                       |

## SARS-CoV-2 &amp; Autographa californica nucleopolyhedrovirus.apr

|                                                     |         |                                                                                 |                       |                       |                       |                       |                       |                       |                       |
|-----------------------------------------------------|---------|---------------------------------------------------------------------------------|-----------------------|-----------------------|-----------------------|-----------------------|-----------------------|-----------------------|-----------------------|
|                                                     |         | Section 358                                                                     |                       |                       |                       |                       |                       |                       |                       |
| Autographa californica nucleopolyhedrovirus NC 0... | (27490) | <a href="#">27490</a>                                                           | <a href="#">27500</a> | <a href="#">27511</a> | <a href="#">27522</a> | <a href="#">27533</a> | <a href="#">27544</a> | <a href="#">27555</a> | <a href="#">27566</a> |
|                                                     | (27490) | ACAGCTGGCCGGAATAGACGTGCCCGTGATGTGTGTCAGCAGAGCTGAGCAGTCAGCCATAGAGGCTAGAGCTACA    |                       |                       |                       |                       |                       |                       |                       |
| SARS-CoV-2 NC_045512.2                              | (1)     | -----                                                                           |                       |                       |                       |                       |                       |                       |                       |
|                                                     |         | Section 359                                                                     |                       |                       |                       |                       |                       |                       |                       |
| Autographa californica nucleopolyhedrovirus NC 0... | (27567) | <a href="#">27567</a>                                                           | <a href="#">27577</a> | <a href="#">27588</a> | <a href="#">27599</a> | <a href="#">27610</a> | <a href="#">27621</a> | <a href="#">27632</a> | <a href="#">27643</a> |
|                                                     | (27567) | AGTGCCAGCAAGCGATACATGATGAACTTTAAGTCCCCACAGCAAAGTGGCGCTTTTATATAAAAAATTTGGGCCATT  |                       |                       |                       |                       |                       |                       |                       |
| SARS-CoV-2 NC_045512.2                              | (1)     | -----                                                                           |                       |                       |                       |                       |                       |                       |                       |
|                                                     |         | Section 360                                                                     |                       |                       |                       |                       |                       |                       |                       |
| Autographa californica nucleopolyhedrovirus NC 0... | (27644) | <a href="#">27644</a>                                                           | <a href="#">27654</a> | <a href="#">27665</a> | <a href="#">27676</a> | <a href="#">27687</a> | <a href="#">27698</a> | <a href="#">27709</a> | <a href="#">27720</a> |
|                                                     | (27644) | TTTGCCGATTAGATAATTTTTGAAGATTAGATAATATTGAGATTAGTTAATAATTTGTGTGATTAGATAACTTTTTTA  |                       |                       |                       |                       |                       |                       |                       |
| SARS-CoV-2 NC_045512.2                              | (1)     | -----                                                                           |                       |                       |                       |                       |                       |                       |                       |
|                                                     |         | Section 361                                                                     |                       |                       |                       |                       |                       |                       |                       |
| Autographa californica nucleopolyhedrovirus NC 0... | (27721) | <a href="#">27721</a>                                                           | <a href="#">27731</a> | <a href="#">27742</a> | <a href="#">27753</a> | <a href="#">27764</a> | <a href="#">27775</a> | <a href="#">27786</a> | <a href="#">27797</a> |
|                                                     | (27721) | GGGTATTGCGCATTATAAATCAAGGTCGAGTTGTATAAACTGCTCTGGCGTGTAAGTGCAGACTTAAGTTTTTTG     |                       |                       |                       |                       |                       |                       |                       |
| SARS-CoV-2 NC_045512.2                              | (1)     | -----                                                                           |                       |                       |                       |                       |                       |                       |                       |
|                                                     |         | Section 362                                                                     |                       |                       |                       |                       |                       |                       |                       |
| Autographa californica nucleopolyhedrovirus NC 0... | (27798) | <a href="#">27798</a>                                                           | <a href="#">27808</a> | <a href="#">27819</a> | <a href="#">27830</a> | <a href="#">27841</a> | <a href="#">27852</a> | <a href="#">27863</a> | <a href="#">27874</a> |
|                                                     | (27798) | CAAACACTCGGTCTGAATCGCTAAAAATCTTTCTGACCGGTGGTTAGATTAAATTCGGCCAGCCGCGTCGCCCACATAA |                       |                       |                       |                       |                       |                       |                       |
| SARS-CoV-2 NC_045512.2                              | (1)     | -----                                                                           |                       |                       |                       |                       |                       |                       |                       |
|                                                     |         | Section 363                                                                     |                       |                       |                       |                       |                       |                       |                       |
| Autographa californica nucleopolyhedrovirus NC 0... | (27875) | <a href="#">27875</a>                                                           | <a href="#">27885</a> | <a href="#">27896</a> | <a href="#">27907</a> | <a href="#">27918</a> | <a href="#">27929</a> | <a href="#">27940</a> | <a href="#">27951</a> |
|                                                     | (27875) | AAAGATTGTTTCCTTGTCAATATGCGTAAACTGTTGGCCATCTCGCGCCACATTCCCGTGTCGGGCTTTTCGATGCTC  |                       |                       |                       |                       |                       |                       |                       |
| SARS-CoV-2 NC_045512.2                              | (1)     | -----                                                                           |                       |                       |                       |                       |                       |                       |                       |
|                                                     |         | Section 364                                                                     |                       |                       |                       |                       |                       |                       |                       |
| Autographa californica nucleopolyhedrovirus NC 0... | (27952) | <a href="#">27952</a>                                                           | <a href="#">27962</a> | <a href="#">27973</a> | <a href="#">27984</a> | <a href="#">27995</a> | <a href="#">28006</a> | <a href="#">28017</a> | <a href="#">28028</a> |
|                                                     | (27952) | ATCCTTGTTGGGCGACACATAAACGATATGGGCACGCCAGTAGCTTTTTTAATATTCTCTAATTTATATAATAAAT    |                       |                       |                       |                       |                       |                       |                       |
| SARS-CoV-2 NC_045512.2                              | (1)     | -----                                                                           |                       |                       |                       |                       |                       |                       |                       |

## SARS-CoV-2 &amp; Autographa californica nucleopolyhedrovirus.apr

|                                                     |         |                                                                                |                       |                       |                       |                       |                       |                       |                       |
|-----------------------------------------------------|---------|--------------------------------------------------------------------------------|-----------------------|-----------------------|-----------------------|-----------------------|-----------------------|-----------------------|-----------------------|
|                                                     |         |                                                                                |                       |                       |                       |                       |                       |                       | Section 365           |
| Autographa californica nucleopolyhedrovirus NC 0... | (28029) | <a href="#">28029</a>                                                          | <a href="#">28039</a> | <a href="#">28050</a> | <a href="#">28061</a> | <a href="#">28072</a> | <a href="#">28083</a> | <a href="#">28094</a> | <a href="#">28105</a> |
|                                                     | (28029) | CGCTCGCTTTGATTTTGCCGGAACCTAAATGGGCTTGGTTCGTAAAAACAACATAAATCGTAGCCTAATTCGTACAAA |                       |                       |                       |                       |                       |                       |                       |
|                                                     | (1)     | -----                                                                          |                       |                       |                       |                       |                       |                       |                       |
|                                                     |         |                                                                                |                       |                       |                       |                       |                       |                       | Section 366           |
| Autographa californica nucleopolyhedrovirus NC 0... | (28106) | <a href="#">28106</a>                                                          | <a href="#">28116</a> | <a href="#">28127</a> | <a href="#">28138</a> | <a href="#">28149</a> | <a href="#">28160</a> | <a href="#">28171</a> | <a href="#">28182</a> |
|                                                     | (28106) | CGCTTTAGCTTGTGTGCGCACGGAAGGAGCTGCCAGTCGTCTGGGTTTTTTGGAAATTTGGACCGTGTCTTTGAGCT  |                       |                       |                       |                       |                       |                       |                       |
|                                                     | (1)     | -----                                                                          |                       |                       |                       |                       |                       |                       |                       |
|                                                     |         |                                                                                |                       |                       |                       |                       |                       |                       | Section 367           |
| Autographa californica nucleopolyhedrovirus NC 0... | (28183) | <a href="#">28183</a>                                                          | <a href="#">28193</a> | <a href="#">28204</a> | <a href="#">28215</a> | <a href="#">28226</a> | <a href="#">28237</a> | <a href="#">28248</a> | <a href="#">28259</a> |
|                                                     | (28183) | AATTAGCGTGCCGTCCAAATCAAAAGCCGCAATTTTGGTTCCTTTAGCGCCGTCATGAACCGCGTACGCATACAAAT  |                       |                       |                       |                       |                       |                       |                       |
|                                                     | (1)     | -----                                                                          |                       |                       |                       |                       |                       |                       |                       |
|                                                     |         |                                                                                |                       |                       |                       |                       |                       |                       | Section 368           |
| Autographa californica nucleopolyhedrovirus NC 0... | (28260) | <a href="#">28260</a>                                                          | <a href="#">28270</a> | <a href="#">28281</a> | <a href="#">28292</a> | <a href="#">28303</a> | <a href="#">28314</a> | <a href="#">28325</a> | <a href="#">28336</a> |
|                                                     | (28260) | CGGGCTGCTGTAACGTCCACATGGTGAATGCATCTTACTCAAAGTCCATCAATTCGTACGCGTTTGTGTCCAGGTCG  |                       |                       |                       |                       |                       |                       |                       |
|                                                     | (1)     | -----                                                                          |                       |                       |                       |                       |                       |                       |                       |
|                                                     |         |                                                                                |                       |                       |                       |                       |                       |                       | Section 369           |
| Autographa californica nucleopolyhedrovirus NC 0... | (28337) | <a href="#">28337</a>                                                          | <a href="#">28347</a> | <a href="#">28358</a> | <a href="#">28369</a> | <a href="#">28380</a> | <a href="#">28391</a> | <a href="#">28402</a> | <a href="#">28413</a> |
|                                                     | (28337) | GGCGTTGAAAAATTGTAGCTTGCCATTAGATCGGATAGCGATTCAAATTTTGTAAAGCGTTTGTAGCGCACGTTTGGC |                       |                       |                       |                       |                       |                       |                       |
|                                                     | (1)     | -----                                                                          |                       |                       |                       |                       |                       |                       |                       |
|                                                     |         |                                                                                |                       |                       |                       |                       |                       |                       | Section 370           |
| Autographa californica nucleopolyhedrovirus NC 0... | (28414) | <a href="#">28414</a>                                                          | <a href="#">28424</a> | <a href="#">28435</a> | <a href="#">28446</a> | <a href="#">28457</a> | <a href="#">28468</a> | <a href="#">28479</a> | <a href="#">28490</a> |
|                                                     | (28414) | ATCTTGTTTTAAATTACACGACGACAGACAGTAAAAATATTCCTCGATAAGCATGACTACACCCATATCACTGTTTA  |                       |                       |                       |                       |                       |                       |                       |
|                                                     | (1)     | -----                                                                          |                       |                       |                       |                       |                       |                       |                       |
|                                                     |         |                                                                                |                       |                       |                       |                       |                       |                       | Section 371           |
| Autographa californica nucleopolyhedrovirus NC 0... | (28491) | <a href="#">28491</a>                                                          | <a href="#">28501</a> | <a href="#">28512</a> | <a href="#">28523</a> | <a href="#">28534</a> | <a href="#">28545</a> | <a href="#">28556</a> | <a href="#">28567</a> |
|                                                     | (28491) | AGTGCTCGACGTAGTTGTTGCATGTTATGTCGCGTGTGCCGCGATACGCGTGATTTCGGTGAAAATCACACCACAAC  |                       |                       |                       |                       |                       |                       |                       |
|                                                     | (1)     | -----                                                                          |                       |                       |                       |                       |                       |                       |                       |

## SARS-CoV-2 &amp; Autographa californica nucleopolyhedrovirus.apr

|                                                     |         |                                                                               |                       |                       |                       |                       |                       |                       |                       |
|-----------------------------------------------------|---------|-------------------------------------------------------------------------------|-----------------------|-----------------------|-----------------------|-----------------------|-----------------------|-----------------------|-----------------------|
| Section 372                                         |         |                                                                               |                       |                       |                       |                       |                       |                       |                       |
| Autographa californica nucleopolyhedrovirus NC 0... | (28568) | <a href="#">28568</a>                                                         | <a href="#">28578</a> | <a href="#">28589</a> | <a href="#">28600</a> | <a href="#">28611</a> | <a href="#">28622</a> | <a href="#">28633</a> | <a href="#">28644</a> |
|                                                     | (28568) | CAGTCGGCGTGCGTGTAACAAAGTCGACAGCGAAACAATTTATCGTTTTCCAAAAAATTTAAATACTCGACAGTTTT |                       |                       |                       |                       |                       |                       |                       |
|                                                     | (1)     | -----                                                                         |                       |                       |                       |                       |                       |                       |                       |
| Section 373                                         |         |                                                                               |                       |                       |                       |                       |                       |                       |                       |
| Autographa californica nucleopolyhedrovirus NC 0... | (28645) | <a href="#">28645</a>                                                         | <a href="#">28655</a> | <a href="#">28666</a> | <a href="#">28677</a> | <a href="#">28688</a> | <a href="#">28699</a> | <a href="#">28710</a> | <a href="#">28721</a> |
|                                                     | (28645) | GCAGCTTAGATTCCGCGTTTGATTACCTTAAATCGTCGTCAGCCTCTATAATCTCGGGCAACAGCTTGCCTTGTT   |                       |                       |                       |                       |                       |                       |                       |
|                                                     | (1)     | -----                                                                         |                       |                       |                       |                       |                       |                       |                       |
| Section 374                                         |         |                                                                               |                       |                       |                       |                       |                       |                       |                       |
| Autographa californica nucleopolyhedrovirus NC 0... | (28722) | <a href="#">28722</a>                                                         | <a href="#">28732</a> | <a href="#">28743</a> | <a href="#">28754</a> | <a href="#">28765</a> | <a href="#">28776</a> | <a href="#">28787</a> | <a href="#">28798</a> |
|                                                     | (28722) | GCCCCATCGTATCGATCACCTCCCCCAAGTGGCCCGGTGTTATATTAAGTCGTTTAAATCATTATTGCTTCCTGC   |                       |                       |                       |                       |                       |                       |                       |
|                                                     | (1)     | -----                                                                         |                       |                       |                       |                       |                       |                       |                       |
| Section 375                                         |         |                                                                               |                       |                       |                       |                       |                       |                       |                       |
| Autographa californica nucleopolyhedrovirus NC 0... | (28799) | <a href="#">28799</a>                                                         | <a href="#">28809</a> | <a href="#">28820</a> | <a href="#">28831</a> | <a href="#">28842</a> | <a href="#">28853</a> | <a href="#">28864</a> | <a href="#">28875</a> |
|                                                     | (28799) | ACGTCGGCCTGGTAATTTTTGACCACGGGCGTGGAATCAATTGCCGTTGAAGGGAAATAATTCGTGGTGTGGGTAT  |                       |                       |                       |                       |                       |                       |                       |
|                                                     | (1)     | -----                                                                         |                       |                       |                       |                       |                       |                       |                       |
| Section 376                                         |         |                                                                               |                       |                       |                       |                       |                       |                       |                       |
| Autographa californica nucleopolyhedrovirus NC 0... | (28876) | <a href="#">28876</a>                                                         | <a href="#">28886</a> | <a href="#">28897</a> | <a href="#">28908</a> | <a href="#">28919</a> | <a href="#">28930</a> | <a href="#">28941</a> | <a href="#">28952</a> |
|                                                     | (28876) | CGGCCGCCTGTTGCACAATTCCACCAGCGGTGGAGGCAAGGGCGCATTACAGCAACCGTTGTCATTTATAAGTAAT  |                       |                       |                       |                       |                       |                       |                       |
|                                                     | (1)     | -----                                                                         |                       |                       |                       |                       |                       |                       |                       |
| Section 377                                         |         |                                                                               |                       |                       |                       |                       |                       |                       |                       |
| Autographa californica nucleopolyhedrovirus NC 0... | (28953) | <a href="#">28953</a>                                                         | <a href="#">28963</a> | <a href="#">28974</a> | <a href="#">28985</a> | <a href="#">28996</a> | <a href="#">29007</a> | <a href="#">29018</a> | <a href="#">29029</a> |
|                                                     | (28953) | AGTGTAATAATGCAAATATTCATCAAAACATTGACGGGCAAAACCATTAACGCCGAAACGGAACCCGCAGAGACGGT |                       |                       |                       |                       |                       |                       |                       |
|                                                     | (1)     | -----                                                                         |                       |                       |                       |                       |                       |                       |                       |
| Section 378                                         |         |                                                                               |                       |                       |                       |                       |                       |                       |                       |
| Autographa californica nucleopolyhedrovirus NC 0... | (29030) | <a href="#">29030</a>                                                         | <a href="#">29040</a> | <a href="#">29051</a> | <a href="#">29062</a> | <a href="#">29073</a> | <a href="#">29084</a> | <a href="#">29095</a> | <a href="#">29106</a> |
|                                                     | (29030) | GGCCGATCTTAAGCAAAAAATTGCCGATAAAGAAGGTGTGCCCGTAGATCAACAAAGACTTATCTTTGCGGGCAAAC |                       |                       |                       |                       |                       |                       |                       |
|                                                     | (1)     | -----                                                                         |                       |                       |                       |                       |                       |                       |                       |

## SARS-CoV-2 &amp; Autographa californica nucleopolyhedrovirus.apr

|                                                     |         |                                                                                |                       |                       |                       |                       |                       |                       |                       |
|-----------------------------------------------------|---------|--------------------------------------------------------------------------------|-----------------------|-----------------------|-----------------------|-----------------------|-----------------------|-----------------------|-----------------------|
| Section 379                                         |         |                                                                                |                       |                       |                       |                       |                       |                       |                       |
| Autographa californica nucleopolyhedrovirus NC 0... | (29107) | <a href="#">29107</a>                                                          | <a href="#">29117</a> | <a href="#">29128</a> | <a href="#">29139</a> | <a href="#">29150</a> | <a href="#">29161</a> | <a href="#">29172</a> | <a href="#">29183</a> |
|                                                     | (29107) | AACTGGAAGATTCCAAAACCTATGGCCGATTACAATATTCAGAAGGAATCTACTCTTCACATGGTGTTACGATTACGA |                       |                       |                       |                       |                       |                       |                       |
|                                                     | (1)     | -----                                                                          |                       |                       |                       |                       |                       |                       |                       |
| Section 380                                         |         |                                                                                |                       |                       |                       |                       |                       |                       |                       |
| Autographa californica nucleopolyhedrovirus NC 0... | (29184) | <a href="#">29184</a>                                                          | <a href="#">29194</a> | <a href="#">29205</a> | <a href="#">29216</a> | <a href="#">29227</a> | <a href="#">29238</a> | <a href="#">29249</a> | <a href="#">29260</a> |
|                                                     | (29184) | GGAGGGTATTAATAATAACAATAATAAAAAACCATTAAATATACATAAAAGTTTTTTATTTAATCTGACATATTTGTA |                       |                       |                       |                       |                       |                       |                       |
|                                                     | (1)     | -----                                                                          |                       |                       |                       |                       |                       |                       |                       |
| Section 381                                         |         |                                                                                |                       |                       |                       |                       |                       |                       |                       |
| Autographa californica nucleopolyhedrovirus NC 0... | (29261) | <a href="#">29261</a>                                                          | <a href="#">29271</a> | <a href="#">29282</a> | <a href="#">29293</a> | <a href="#">29304</a> | <a href="#">29315</a> | <a href="#">29326</a> | <a href="#">29337</a> |
|                                                     | (29261) | TCTTGTGTATTATCGCTAACCATTAAGTGCTGGAGCCACAGTGTTGCGGCGAGTCTTTATAGAAGATCGTTGTTT    |                       |                       |                       |                       |                       |                       |                       |
|                                                     | (1)     | -----                                                                          |                       |                       |                       |                       |                       |                       |                       |
| Section 382                                         |         |                                                                                |                       |                       |                       |                       |                       |                       |                       |
| Autographa californica nucleopolyhedrovirus NC 0... | (29338) | <a href="#">29338</a>                                                          | <a href="#">29348</a> | <a href="#">29359</a> | <a href="#">29370</a> | <a href="#">29381</a> | <a href="#">29392</a> | <a href="#">29403</a> | <a href="#">29414</a> |
|                                                     | (29338) | GGCTGGAAGTGAAGCTTTTCCTTTTCCTGCTGCCGCTAATGGGAGTGGGCACGTACTCTGTAGTAGACGGTGCAACGG |                       |                       |                       |                       |                       |                       |                       |
|                                                     | (1)     | -----                                                                          |                       |                       |                       |                       |                       |                       |                       |
| Section 383                                         |         |                                                                                |                       |                       |                       |                       |                       |                       |                       |
| Autographa californica nucleopolyhedrovirus NC 0... | (29415) | <a href="#">29415</a>                                                          | <a href="#">29425</a> | <a href="#">29436</a> | <a href="#">29447</a> | <a href="#">29458</a> | <a href="#">29469</a> | <a href="#">29480</a> | <a href="#">29491</a> |
|                                                     | (29415) | GCAACTTGAGCGCTACCGTCTTAAATTTGGCCATACTTTTAGTGATGAAATCGCGCGTTAACACTTCGTCGTAAATG  |                       |                       |                       |                       |                       |                       |                       |
|                                                     | (1)     | -----                                                                          |                       |                       |                       |                       |                       |                       |                       |
| Section 384                                         |         |                                                                                |                       |                       |                       |                       |                       |                       |                       |
| Autographa californica nucleopolyhedrovirus NC 0... | (29492) | <a href="#">29492</a>                                                          | <a href="#">29502</a> | <a href="#">29513</a> | <a href="#">29524</a> | <a href="#">29535</a> | <a href="#">29546</a> | <a href="#">29557</a> | <a href="#">29568</a> |
|                                                     | (29492) | TTACTTAGCAGAGGCGCAACATTGTGATTAAATGTCTCGTTTAAACAAGCTGTAAACTCCGAATAAAGCTTATCGCG  |                       |                       |                       |                       |                       |                       |                       |
|                                                     | (1)     | -----                                                                          |                       |                       |                       |                       |                       |                       |                       |
| Section 385                                         |         |                                                                                |                       |                       |                       |                       |                       |                       |                       |
| Autographa californica nucleopolyhedrovirus NC 0... | (29569) | <a href="#">29569</a>                                                          | <a href="#">29579</a> | <a href="#">29590</a> | <a href="#">29601</a> | <a href="#">29612</a> | <a href="#">29623</a> | <a href="#">29634</a> | <a href="#">29645</a> |
|                                                     | (29569) | CATTTGCGAGCTCTCCTTCAATTCTGCCAAATTTGCGTTGGTAAGCACACAGTCTGTCTTTTTTTGCTCGCTGGAA   |                       |                       |                       |                       |                       |                       |                       |
|                                                     | (1)     | -----                                                                          |                       |                       |                       |                       |                       |                       |                       |

## SARS-CoV-2 &amp; Autographa californica nucleopolyhedrovirus.apr

|                                                     |         |                                                                               |                       |                       |                       |                       |                       |                       |                       |
|-----------------------------------------------------|---------|-------------------------------------------------------------------------------|-----------------------|-----------------------|-----------------------|-----------------------|-----------------------|-----------------------|-----------------------|
|                                                     |         |                                                                               |                       |                       |                       |                       |                       |                       | Section 386           |
| Autographa californica nucleopolyhedrovirus NC 0... | (29646) | <a href="#">29646</a>                                                         | <a href="#">29656</a> | <a href="#">29667</a> | <a href="#">29678</a> | <a href="#">29689</a> | <a href="#">29700</a> | <a href="#">29711</a> | <a href="#">29722</a> |
|                                                     | (29646) | TTGCTGCGTTCTCGCTTGAAGACGACGATGTCGATCGGTCGGCCATTTTTTTGCCAGCTTTTCAGTGTGATCAAAA  |                       |                       |                       |                       |                       |                       |                       |
|                                                     | (1)     | -----                                                                         |                       |                       |                       |                       |                       |                       |                       |
|                                                     |         |                                                                               |                       |                       |                       |                       |                       |                       | Section 387           |
| Autographa californica nucleopolyhedrovirus NC 0... | (29723) | <a href="#">29723</a>                                                         | <a href="#">29733</a> | <a href="#">29744</a> | <a href="#">29755</a> | <a href="#">29766</a> | <a href="#">29777</a> | <a href="#">29788</a> | <a href="#">29799</a> |
|                                                     | (29723) | ATGAACACAAAATCTGCCAATTCGGGCTTGTTTTTCACCAAATCCCACATGGCCGGGCTACTAGGCCACTCGGGCTG |                       |                       |                       |                       |                       |                       |                       |
|                                                     | (1)     | -----                                                                         |                       |                       |                       |                       |                       |                       |                       |
|                                                     |         |                                                                               |                       |                       |                       |                       |                       |                       | Section 388           |
| Autographa californica nucleopolyhedrovirus NC 0... | (29800) | <a href="#">29800</a>                                                         | <a href="#">29810</a> | <a href="#">29821</a> | <a href="#">29832</a> | <a href="#">29843</a> | <a href="#">29854</a> | <a href="#">29865</a> | <a href="#">29876</a> |
|                                                     | (29800) | CTTGATCTTAGTGTACCAACTGTTAAACAAAATGTATTTATTGTTGTTAATCACTTTCTTCTTGCGTTTGGACATTT |                       |                       |                       |                       |                       |                       |                       |
|                                                     | (1)     | -----                                                                         |                       |                       |                       |                       |                       |                       |                       |
|                                                     |         |                                                                               |                       |                       |                       |                       |                       |                       | Section 389           |
| Autographa californica nucleopolyhedrovirus NC 0... | (29877) | <a href="#">29877</a>                                                         | <a href="#">29887</a> | <a href="#">29898</a> | <a href="#">29909</a> | <a href="#">29920</a> | <a href="#">29931</a> | <a href="#">29942</a> | <a href="#">29953</a> |
|                                                     | (29877) | TGCGTTCGTCTTGCATGACAGGCACCACGTTAAGGATATAGTTAATGTTCTTTCTTTCCAAGAAATTTACAATAACG |                       |                       |                       |                       |                       |                       |                       |
|                                                     | (1)     | -----                                                                         |                       |                       |                       |                       |                       |                       |                       |
|                                                     |         |                                                                               |                       |                       |                       |                       |                       |                       | Section 390           |
| Autographa californica nucleopolyhedrovirus NC 0... | (29954) | <a href="#">29954</a>                                                         | <a href="#">29964</a> | <a href="#">29975</a> | <a href="#">29986</a> | <a href="#">29997</a> | <a href="#">30008</a> | <a href="#">30019</a> | <a href="#">30030</a> |
|                                                     | (29954) | GCCAGCTGGTCCATGTTGGATTTGTTGTAAGAGCTCGATTCCAGTTTATTCAACAGCTTTTCATTTTTGCACACGGC |                       |                       |                       |                       |                       |                       |                       |
|                                                     | (1)     | -----                                                                         |                       |                       |                       |                       |                       |                       |                       |
|                                                     |         |                                                                               |                       |                       |                       |                       |                       |                       | Section 391           |
| Autographa californica nucleopolyhedrovirus NC 0... | (30031) | <a href="#">30031</a>                                                         | <a href="#">30041</a> | <a href="#">30052</a> | <a href="#">30063</a> | <a href="#">30074</a> | <a href="#">30085</a> | <a href="#">30096</a> | <a href="#">30107</a> |
|                                                     | (30031) | CGCAGTCTCCGGAGATTGTTGCTCCGGCACGTTTACCATGTTTGCTTCTTGTAACCTTTGAAACAACCCGTTTGTA  |                       |                       |                       |                       |                       |                       |                       |
|                                                     | (1)     | -----                                                                         |                       |                       |                       |                       |                       |                       |                       |
|                                                     |         |                                                                               |                       |                       |                       |                       |                       |                       | Section 392           |
| Autographa californica nucleopolyhedrovirus NC 0... | (30108) | <a href="#">30108</a>                                                         | <a href="#">30118</a> | <a href="#">30129</a> | <a href="#">30140</a> | <a href="#">30151</a> | <a href="#">30162</a> | <a href="#">30173</a> | <a href="#">30184</a> |
|                                                     | (30108) | TTCTTGATGATATATTTTTTTAATGCCCAACAACCTGGCAATTCGTTTGTGATGAAGACACACCTTACGCTTCGAAC |                       |                       |                       |                       |                       |                       |                       |
|                                                     | (1)     | -----                                                                         |                       |                       |                       |                       |                       |                       |                       |



## SARS-CoV-2 &amp; Autographa californica nucleopolyhedrovirus.apr

|                                                     |                        |                                                                                |       |       |       |       |       |       |             |
|-----------------------------------------------------|------------------------|--------------------------------------------------------------------------------|-------|-------|-------|-------|-------|-------|-------------|
|                                                     |                        |                                                                                |       |       |       |       |       |       | Section 393 |
| Autographa californica nucleopolyhedrovirus NC 0... | (30185)                | 30185                                                                          | 30195 | 30206 | 30217 | 30228 | 30239 | 30250 | 30261       |
|                                                     | (30185)                | ATTTGTCGGTGATTACTGTGAAATGGCCTAAATTAGCTCTTATATATTCTTTTATACGCTCAAACGACACGATGTCC  |       |       |       |       |       |       |             |
|                                                     | SARS-CoV-2 NC_045512.2 | (1)                                                                            | ----- |       |       |       |       |       |             |
|                                                     |                        |                                                                                |       |       |       |       |       |       | Section 394 |
| Autographa californica nucleopolyhedrovirus NC 0... | (30262)                | 30262                                                                          | 30272 | 30283 | 30294 | 30305 | 30316 | 30327 | 30338       |
|                                                     | (30262)                | AACATGTGCGCGCAGACGTTTTCTGTGTTTCATCGTGTGCTTGAGCGTGTTGATGGCTTCCCTGAACAGCGCTTGAT  |       |       |       |       |       |       |             |
|                                                     | SARS-CoV-2 NC_045512.2 | (1)                                                                            | ----- |       |       |       |       |       |             |
|                                                     |                        |                                                                                |       |       |       |       |       |       | Section 395 |
| Autographa californica nucleopolyhedrovirus NC 0... | (30339)                | 30339                                                                          | 30349 | 30360 | 30371 | 30382 | 30393 | 30404 | 30415       |
|                                                     | (30339)                | TTCGCTGCGAGTCAAGCAGTCCGAATCACACCCGCCTAAGTGCGTGCAATTTTTGGGGGGCATCGTTGTCTATCTTT  |       |       |       |       |       |       |             |
|                                                     | SARS-CoV-2 NC_045512.2 | (1)                                                                            | ----- |       |       |       |       |       |             |
|                                                     |                        |                                                                                |       |       |       |       |       |       | Section 396 |
| Autographa californica nucleopolyhedrovirus NC 0... | (30416)                | 30416                                                                          | 30426 | 30437 | 30448 | 30459 | 30470 | 30481 | 30492       |
|                                                     | (30416)                | TTCAGAGTGGCGTAGAAAAAGTCCTGCAATTGCCTATTATCAAAACGCGCCTTGACGCTGCGCACAAAATCAAAAA   |       |       |       |       |       |       |             |
|                                                     | SARS-CoV-2 NC_045512.2 | (1)                                                                            | ----- |       |       |       |       |       |             |
|                                                     |                        |                                                                                |       |       |       |       |       |       | Section 397 |
| Autographa californica nucleopolyhedrovirus NC 0... | (30493)                | 30493                                                                          | 30503 | 30514 | 30525 | 30536 | 30547 | 30558 | 30569       |
|                                                     | (30493)                | TTCAATGTAATTGCTGTAATCGTACGTGATCAGTTGTTTGTCGTTTCATATAATTAAAGTATTTGTTGAGCGGCACGA |       |       |       |       |       |       |             |
|                                                     | SARS-CoV-2 NC_045512.2 | (1)                                                                            | ----- |       |       |       |       |       |             |
|                                                     |                        |                                                                                |       |       |       |       |       |       | Section 398 |
| Autographa californica nucleopolyhedrovirus NC 0... | (30570)                | 30570                                                                          | 30580 | 30591 | 30602 | 30613 | 30624 | 30635 | 30646       |
|                                                     | (30570)                | TGGCCAGGCTGCGCGCTATTTTCGCAATTGAAGCGTCGCGGTTTTAACATTATACGGTAGTCATTGCCAAACGTGCCC |       |       |       |       |       |       |             |
|                                                     | SARS-CoV-2 NC_045512.2 | (1)                                                                            | ----- |       |       |       |       |       |             |
|                                                     |                        |                                                                                |       |       |       |       |       |       | Section 399 |
| Autographa californica nucleopolyhedrovirus NC 0... | (30647)                | 30647                                                                          | 30657 | 30668 | 30679 | 30690 | 30701 | 30712 | 30723       |
|                                                     | (30647)                | GGCAACAACCTTCACGGTGACGTGTTGGGTTTGGCGTTCACGTTAATCAAGTTGCCGCGCACGACGCCTACGTATAT  |       |       |       |       |       |       |             |
|                                                     | SARS-CoV-2 NC_045512.2 | (1)                                                                            | ----- |       |       |       |       |       |             |

## SARS-CoV-2 &amp; Autographa californica nucleopolyhedrovirus.apr

|                                                     |         |                                                                                 |                       |                       |                       |                       |                       |                       |                       |
|-----------------------------------------------------|---------|---------------------------------------------------------------------------------|-----------------------|-----------------------|-----------------------|-----------------------|-----------------------|-----------------------|-----------------------|
| Section 400                                         |         |                                                                                 |                       |                       |                       |                       |                       |                       |                       |
| Autographa californica nucleopolyhedrovirus NC 0... | (30724) | <a href="#">30724</a>                                                           | <a href="#">30734</a> | <a href="#">30745</a> | <a href="#">30756</a> | <a href="#">30767</a> | <a href="#">30778</a> | <a href="#">30789</a> | <a href="#">30800</a> |
|                                                     | (30724) | CAAATACTTGTAGGTGACGCCGTCATCTTTCCATTGTAACGTAAATGGCAACTTGTAGATGAACGCGCTGTCAAAAA   |                       |                       |                       |                       |                       |                       |                       |
|                                                     | (1)     | -----                                                                           |                       |                       |                       |                       |                       |                       |                       |
| Section 401                                         |         |                                                                                 |                       |                       |                       |                       |                       |                       |                       |
| Autographa californica nucleopolyhedrovirus NC 0... | (30801) | <a href="#">30801</a>                                                           | <a href="#">30811</a> | <a href="#">30822</a> | <a href="#">30833</a> | <a href="#">30844</a> | <a href="#">30855</a> | <a href="#">30866</a> | <a href="#">30877</a> |
|                                                     | (30801) | ACCGGCCAGTTTCTTCCACAAACTCGCGCACGGCTGTCTCGTAAACTTTTGCCTCGCAACAATCGCGATGACCTCGT   |                       |                       |                       |                       |                       |                       |                       |
|                                                     | (1)     | -----                                                                           |                       |                       |                       |                       |                       |                       |                       |
| Section 402                                         |         |                                                                                 |                       |                       |                       |                       |                       |                       |                       |
| Autographa californica nucleopolyhedrovirus NC 0... | (30878) | <a href="#">30878</a>                                                           | <a href="#">30888</a> | <a href="#">30899</a> | <a href="#">30910</a> | <a href="#">30921</a> | <a href="#">30932</a> | <a href="#">30943</a> | <a href="#">30954</a> |
|                                                     | (30878) | GGTATGGAAATTTTTTCTAAAAAGTGTCGTTTCATGTCTGGCGGCGGGCGCGTTTCGCGCTCCGGTACGCGCGACGGGC |                       |                       |                       |                       |                       |                       |                       |
|                                                     | (1)     | -----                                                                           |                       |                       |                       |                       |                       |                       |                       |
| Section 403                                         |         |                                                                                 |                       |                       |                       |                       |                       |                       |                       |
| Autographa californica nucleopolyhedrovirus NC 0... | (30955) | <a href="#">30955</a>                                                           | <a href="#">30965</a> | <a href="#">30976</a> | <a href="#">30987</a> | <a href="#">30998</a> | <a href="#">31009</a> | <a href="#">31020</a> | <a href="#">31031</a> |
|                                                     | (30955) | ACACAGCAGGACAGCCTTGTCCGGCTCGATTATCATAAACAATCCTGCAGCGTTTCGCATTTTACATATTTGACACT   |                       |                       |                       |                       |                       |                       |                       |
|                                                     | (1)     | -----                                                                           |                       |                       |                       |                       |                       |                       |                       |
| Section 404                                         |         |                                                                                 |                       |                       |                       |                       |                       |                       |                       |
| Autographa californica nucleopolyhedrovirus NC 0... | (31032) | <a href="#">31032</a>                                                           | <a href="#">31042</a> | <a href="#">31053</a> | <a href="#">31064</a> | <a href="#">31075</a> | <a href="#">31086</a> | <a href="#">31097</a> | <a href="#">31108</a> |
|                                                     | (31032) | TAAAAAATTGCGCACACGAGCACCATCGTTTGATACCTAATTGCAACTATTTACAATTTATCAGTTTACGTTGAACC   |                       |                       |                       |                       |                       |                       |                       |
|                                                     | (1)     | -----                                                                           |                       |                       |                       |                       |                       |                       |                       |
| Section 405                                         |         |                                                                                 |                       |                       |                       |                       |                       |                       |                       |
| Autographa californica nucleopolyhedrovirus NC 0... | (31109) | <a href="#">31109</a>                                                           | <a href="#">31119</a> | <a href="#">31130</a> | <a href="#">31141</a> | <a href="#">31152</a> | <a href="#">31163</a> | <a href="#">31174</a> | <a href="#">31185</a> |
|                                                     | (31109) | CGTTTTAATTTTTTAGATCCGTCCTTGTTTCAGTTGCAAGTTGACTAAATGACAAAATTTTTCGGTTCTGCAAAACCG  |                       |                       |                       |                       |                       |                       |                       |
|                                                     | (1)     | -----                                                                           |                       |                       |                       |                       |                       |                       |                       |
| Section 406                                         |         |                                                                                 |                       |                       |                       |                       |                       |                       |                       |
| Autographa californica nucleopolyhedrovirus NC 0... | (31186) | <a href="#">31186</a>                                                           | <a href="#">31196</a> | <a href="#">31207</a> | <a href="#">31218</a> | <a href="#">31229</a> | <a href="#">31240</a> | <a href="#">31251</a> | <a href="#">31262</a> |
|                                                     | (31186) | CCCTTGTCGTGTTCCACCCGTTGTATTTGAAAAAACTTTTTTTCACGCGGCGACAACCTGCTTGATAATATTGCCCAA  |                       |                       |                       |                       |                       |                       |                       |
|                                                     | (1)     | -----                                                                           |                       |                       |                       |                       |                       |                       |                       |

## SARS-CoV-2 &amp; Autographa californica nucleopolyhedrovirus.apr

|                                                     |         |                                                                                |       |       |       |       |       |             |
|-----------------------------------------------------|---------|--------------------------------------------------------------------------------|-------|-------|-------|-------|-------|-------------|
|                                                     |         | Section 407                                                                    |       |       |       |       |       |             |
| Autographa californica nucleopolyhedrovirus NC 0... | (31263) | 31263                                                                          | 31273 | 31284 | 31295 | 31306 | 31317 | 31328 31339 |
|                                                     | (31263) | TGTAACATGCAAAATTTTGTACTCTCGTCAAAACAGCGGTTGGCGTTCCATTCCATAATTTTTTTATTATTTATC    |       |       |       |       |       |             |
|                                                     | (1)     | -----                                                                          |       |       |       |       |       |             |
|                                                     |         | Section 408                                                                    |       |       |       |       |       |             |
| Autographa californica nucleopolyhedrovirus NC 0... | (31340) | 31340                                                                          | 31350 | 31361 | 31372 | 31383 | 31394 | 31405 31416 |
|                                                     | (31340) | AACGATGGCCATTGTAAATTGTCGTCATTTATACGCATCATATGATTTAACAAAAGCTTTTCGTATAGCGGAAC TTC |       |       |       |       |       |             |
|                                                     | (1)     | -----                                                                          |       |       |       |       |       |             |
|                                                     |         | Section 409                                                                    |       |       |       |       |       |             |
| Autographa californica nucleopolyhedrovirus NC 0... | (31417) | 31417                                                                          | 31427 | 31438 | 31449 | 31460 | 31471 | 31482 31493 |
|                                                     | (31417) | AATTCCCTTGGAACATTTTTCAAACGATAATTTAATTTGTTTCTCGGTTGGCAGCATTTTCATGCTTGATTAACAATC |       |       |       |       |       |             |
|                                                     | (1)     | -----                                                                          |       |       |       |       |       |             |
|                                                     |         | Section 410                                                                    |       |       |       |       |       |             |
| Autographa californica nucleopolyhedrovirus NC 0... | (31494) | 31494                                                                          | 31504 | 31515 | 31526 | 31537 | 31548 | 31559 31570 |
|                                                     | (31494) | GCCTGACTTTTATAGCCACGTTTATGTCTTTGCACAGCAAATGTGGGTTGTCGACAATGTAATAGTGCAAAGCATTT  |       |       |       |       |       |             |
|                                                     | (1)     | -----                                                                          |       |       |       |       |       |             |
|                                                     |         | Section 411                                                                    |       |       |       |       |       |             |
| Autographa californica nucleopolyhedrovirus NC 0... | (31571) | 31571                                                                          | 31581 | 31592 | 31603 | 31614 | 31625 | 31636 31647 |
|                                                     | (31571) | GTTACGGCAAATGCGTAGTTTGATTTGACGACGCCCTTTTCTTGACGGGCATTGCGGCTTTTAAAATTACTTGCAA   |       |       |       |       |       |             |
|                                                     | (1)     | -----                                                                          |       |       |       |       |       |             |
|                                                     |         | Section 412                                                                    |       |       |       |       |       |             |
| Autographa californica nucleopolyhedrovirus NC 0... | (31648) | 31648                                                                          | 31658 | 31669 | 31680 | 31691 | 31702 | 31713 31724 |
|                                                     | (31648) | GCATTGTACGAATACCTCTTTGTGTTTAAACAATAATATGGACAAACATCGGCGAAACAATTTGTAATAATTATGAA  |       |       |       |       |       |             |
|                                                     | (1)     | -----                                                                          |       |       |       |       |       |             |
|                                                     |         | Section 413                                                                    |       |       |       |       |       |             |
| Autographa californica nucleopolyhedrovirus NC 0... | (31725) | 31725                                                                          | 31735 | 31746 | 31757 | 31768 | 31779 | 31790 31801 |
|                                                     | (31725) | ATCCCAAATTGCAGGTTTTAACTTCTTTGTTACTTGTTTTATAATAAATAAAATTTGCTGACCCATGTCTGCGCCC   |       |       |       |       |       |             |
|                                                     | (1)     | -----                                                                          |       |       |       |       |       |             |

## SARS-CoV-2 &amp; Autographa californica nucleopolyhedrovirus.apr

|                                                     |         |                                                                                |       |       |       |       |       |             |
|-----------------------------------------------------|---------|--------------------------------------------------------------------------------|-------|-------|-------|-------|-------|-------------|
|                                                     |         | Section 414                                                                    |       |       |       |       |       |             |
| Autographa californica nucleopolyhedrovirus NC 0... | (31802) | 31802                                                                          | 31812 | 31823 | 31834 | 31845 | 31856 | 31867 31878 |
|                                                     | (31802) | ACAACCTTTAATTAACCATTGTGCGCATATTGATTGTCTCGTTGTTCCCAACCGGAAAATTGATTGATCTCGAGCCA  |       |       |       |       |       |             |
|                                                     | (1)     | -----                                                                          |       |       |       |       |       |             |
|                                                     |         | Section 415                                                                    |       |       |       |       |       |             |
| Autographa californica nucleopolyhedrovirus NC 0... | (31879) | 31879                                                                          | 31889 | 31900 | 31911 | 31922 | 31933 | 31944 31955 |
|                                                     | (31879) | CCGGCATTGGTCGTTTGATACCGTCGTTAACGCCGACGCTCCTGCCTGTTTGATTACGGGTTCTAAAAGACGAAACA  |       |       |       |       |       |             |
|                                                     | (1)     | -----                                                                          |       |       |       |       |       |             |
|                                                     |         | Section 416                                                                    |       |       |       |       |       |             |
| Autographa californica nucleopolyhedrovirus NC 0... | (31956) | 31956                                                                          | 31966 | 31977 | 31988 | 31999 | 32010 | 32021 32032 |
|                                                     | (31956) | GCAGCGTAAATTTGTTTTTGCCTCGGTAGTATTTTGGCAGGCAATAATCAAAAAATCCGTAAGCAATTCTCTGCAT   |       |       |       |       |       |             |
|                                                     | (1)     | -----                                                                          |       |       |       |       |       |             |
|                                                     |         | Section 417                                                                    |       |       |       |       |       |             |
| Autographa californica nucleopolyhedrovirus NC 0... | (32033) | 32033                                                                          | 32043 | 32054 | 32065 | 32076 | 32087 | 32098 32109 |
|                                                     | (32033) | CTATTAATATTTCGTTGCGTACGAATCGAGTTTTTCAAAAATTACTTTGTTTGTATGAAAATAACGTTTGGGCTTCTC |       |       |       |       |       |             |
|                                                     | (1)     | -----                                                                          |       |       |       |       |       |             |
|                                                     |         | Section 418                                                                    |       |       |       |       |       |             |
| Autographa californica nucleopolyhedrovirus NC 0... | (32110) | 32110                                                                          | 32120 | 32131 | 32142 | 32153 | 32164 | 32175 32186 |
|                                                     | (32110) | ACAATAATAATCTTCGTTGTAGAACAGAAACGGTTTGCAGAAATTGGCACGTTTGTCCATGATTGGCTCAGTGTAAC  |       |       |       |       |       |             |
|                                                     | (1)     | -----                                                                          |       |       |       |       |       |             |
|                                                     |         | Section 419                                                                    |       |       |       |       |       |             |
| Autographa californica nucleopolyhedrovirus NC 0... | (32187) | 32187                                                                          | 32197 | 32208 | 32219 | 32230 | 32241 | 32252 32263 |
|                                                     | (32187) | GATTGATTCAAATCAAATTGACAACACGTTTGCCGTAATGTGCACCGGTTGCGACACGTTTGCCGCGTATGTAATC   |       |       |       |       |       |             |
|                                                     | (1)     | -----                                                                          |       |       |       |       |       |             |
|                                                     |         | Section 420                                                                    |       |       |       |       |       |             |
| Autographa californica nucleopolyhedrovirus NC 0... | (32264) | 32264                                                                          | 32274 | 32285 | 32296 | 32307 | 32318 | 32329 32340 |
|                                                     | (32264) | CATGTTTATTTTCGCTGTCGCAATTGATTACACGATTGTGTTGGGCGGCGCGTTTTATTGAATTTAGGCGACGCGTCG |       |       |       |       |       |             |
|                                                     | (1)     | -----                                                                          |       |       |       |       |       |             |

## SARS-CoV-2 &amp; Autographa californica nucleopolyhedrovirus.apr

|                                                     |         |                                                                                |                       |                       |                       |                       |                       |                       |                       |
|-----------------------------------------------------|---------|--------------------------------------------------------------------------------|-----------------------|-----------------------|-----------------------|-----------------------|-----------------------|-----------------------|-----------------------|
| Section 421                                         |         |                                                                                |                       |                       |                       |                       |                       |                       |                       |
| Autographa californica nucleopolyhedrovirus NC 0... | (32341) | <a href="#">32341</a>                                                          | <a href="#">32351</a> | <a href="#">32362</a> | <a href="#">32373</a> | <a href="#">32384</a> | <a href="#">32395</a> | <a href="#">32406</a> | <a href="#">32417</a> |
|                                                     | (32341) | ACAAC TCCAAAGGATTGTAAAGCGCAGATTTTCCAGAGTAAACGAGTTTAAAGTGGCCACCGTTGAACCATTCAGA  |                       |                       |                       |                       |                       |                       |                       |
|                                                     | (1)     | -----                                                                          |                       |                       |                       |                       |                       |                       |                       |
| Section 422                                         |         |                                                                                |                       |                       |                       |                       |                       |                       |                       |
| Autographa californica nucleopolyhedrovirus NC 0... | (32418) | <a href="#">32418</a>                                                          | <a href="#">32428</a> | <a href="#">32439</a> | <a href="#">32450</a> | <a href="#">32461</a> | <a href="#">32472</a> | <a href="#">32483</a> | <a href="#">32494</a> |
|                                                     | (32418) | GCCACGATTGTGTACAGCAAAAAGAATATTTCTTTGTCGACGTTTTCAAACGCAAACCTGTTTTTTAGGCAATAGTA  |                       |                       |                       |                       |                       |                       |                       |
|                                                     | (1)     | -----                                                                          |                       |                       |                       |                       |                       |                       |                       |
| Section 423                                         |         |                                                                                |                       |                       |                       |                       |                       |                       |                       |
| Autographa californica nucleopolyhedrovirus NC 0... | (32495) | <a href="#">32495</a>                                                          | <a href="#">32505</a> | <a href="#">32516</a> | <a href="#">32527</a> | <a href="#">32538</a> | <a href="#">32549</a> | <a href="#">32560</a> | <a href="#">32571</a> |
|                                                     | (32495) | GTAAAATTTTAACGAATTGTATAAAATAAAACATAAAATTGCCATTTTTAAAGTAAAATTCTACATCCGTGACGAACA |                       |                       |                       |                       |                       |                       |                       |
|                                                     | (1)     | -----                                                                          |                       |                       |                       |                       |                       |                       |                       |
| Section 424                                         |         |                                                                                |                       |                       |                       |                       |                       |                       |                       |
| Autographa californica nucleopolyhedrovirus NC 0... | (32572) | <a href="#">32572</a>                                                          | <a href="#">32582</a> | <a href="#">32593</a> | <a href="#">32604</a> | <a href="#">32615</a> | <a href="#">32626</a> | <a href="#">32637</a> | <a href="#">32648</a> |
|                                                     | (32572) | AAAGGTTTACTATTTTGTCTCCAACAAGTGTGCCAATTTTCTTAAGTACACCATTTGAATTTTTGTCGTCGTCCTATC |                       |                       |                       |                       |                       |                       |                       |
|                                                     | (1)     | -----                                                                          |                       |                       |                       |                       |                       |                       |                       |
| Section 425                                         |         |                                                                                |                       |                       |                       |                       |                       |                       |                       |
| Autographa californica nucleopolyhedrovirus NC 0... | (32649) | <a href="#">32649</a>                                                          | <a href="#">32659</a> | <a href="#">32670</a> | <a href="#">32681</a> | <a href="#">32692</a> | <a href="#">32703</a> | <a href="#">32714</a> | <a href="#">32725</a> |
|                                                     | (32649) | TCGATCAACAACACGTACGGCGTTTTGGAATTTAAATTTATTTCTAAATTTTCTGTTGCAACGATTCCACAGCGTC   |                       |                       |                       |                       |                       |                       |                       |
|                                                     | (1)     | -----                                                                          |                       |                       |                       |                       |                       |                       |                       |
| Section 426                                         |         |                                                                                |                       |                       |                       |                       |                       |                       |                       |
| Autographa californica nucleopolyhedrovirus NC 0... | (32726) | <a href="#">32726</a>                                                          | <a href="#">32736</a> | <a href="#">32747</a> | <a href="#">32758</a> | <a href="#">32769</a> | <a href="#">32780</a> | <a href="#">32791</a> | <a href="#">32802</a> |
|                                                     | (32726) | CGACCAATATGACGCTGCCACCTCTAGACAGATGTATTTCTTGAAAACACGTGTCGTTTGATAACCTCGCTGATGG   |                       |                       |                       |                       |                       |                       |                       |
|                                                     | (1)     | -----                                                                          |                       |                       |                       |                       |                       |                       |                       |
| Section 427                                         |         |                                                                                |                       |                       |                       |                       |                       |                       |                       |
| Autographa californica nucleopolyhedrovirus NC 0... | (32803) | <a href="#">32803</a>                                                          | <a href="#">32813</a> | <a href="#">32824</a> | <a href="#">32835</a> | <a href="#">32846</a> | <a href="#">32857</a> | <a href="#">32868</a> | <a href="#">32879</a> |
|                                                     | (32803) | ACGTGATCGATTGTAAATACTTTTCAAACGTCGCGTCTTCCCAACCACGCACCGAAACGGGCGCTGTCGTGTCGGGC  |                       |                       |                       |                       |                       |                       |                       |
|                                                     | (1)     | -----                                                                          |                       |                       |                       |                       |                       |                       |                       |

## SARS-CoV-2 &amp; Autographa californica nucleopolyhedrovirus.apr

|                                                     |         |                                                                                  |                       |                       |                       |                       |                       |                       |                       |
|-----------------------------------------------------|---------|----------------------------------------------------------------------------------|-----------------------|-----------------------|-----------------------|-----------------------|-----------------------|-----------------------|-----------------------|
| Section 428                                         |         |                                                                                  |                       |                       |                       |                       |                       |                       |                       |
| Autographa californica nucleopolyhedrovirus NC 0... | (32880) | <a href="#">32880</a>                                                            | <a href="#">32890</a> | <a href="#">32901</a> | <a href="#">32912</a> | <a href="#">32923</a> | <a href="#">32934</a> | <a href="#">32945</a> | <a href="#">32956</a> |
|                                                     | (32880) | TGATGTTTGAAATCCAAACCACCTCTGAATTAACCTTGGTTGTGATTTCGTATGCTCAACTGTTGACCCAACGTGTAGTG |                       |                       |                       |                       |                       |                       |                       |
| SARS-CoV-2 NC_045512.2                              | (1)     | -----                                                                            |                       |                       |                       |                       |                       |                       |                       |
| Section 429                                         |         |                                                                                  |                       |                       |                       |                       |                       |                       |                       |
| Autographa californica nucleopolyhedrovirus NC 0... | (32957) | <a href="#">32957</a>                                                            | <a href="#">32967</a> | <a href="#">32978</a> | <a href="#">32989</a> | <a href="#">33000</a> | <a href="#">33011</a> | <a href="#">33022</a> | <a href="#">33033</a> |
|                                                     | (32957) | ATCTTCGTAGGCGCGCTCCCACATCACGTTACACACAAATTTGACGAGATCATCAACGTCTTTCTGTTGCAAAATTC    |                       |                       |                       |                       |                       |                       |                       |
| SARS-CoV-2 NC_045512.2                              | (1)     | -----                                                                            |                       |                       |                       |                       |                       |                       |                       |
| Section 430                                         |         |                                                                                  |                       |                       |                       |                       |                       |                       |                       |
| Autographa californica nucleopolyhedrovirus NC 0... | (33034) | <a href="#">33034</a>                                                            | <a href="#">33044</a> | <a href="#">33055</a> | <a href="#">33066</a> | <a href="#">33077</a> | <a href="#">33088</a> | <a href="#">33099</a> | <a href="#">33110</a> |
|                                                     | (33034) | GCCGCAAACGCGCCACATCGCCCTTGTAACACCGATCTCGGCACACAAGCTGTAGCATTTTTAAATCGTGATCGCTC    |                       |                       |                       |                       |                       |                       |                       |
| SARS-CoV-2 NC_045512.2                              | (1)     | -----                                                                            |                       |                       |                       |                       |                       |                       |                       |
| Section 431                                         |         |                                                                                  |                       |                       |                       |                       |                       |                       |                       |
| Autographa californica nucleopolyhedrovirus NC 0... | (33111) | <a href="#">33111</a>                                                            | <a href="#">33121</a> | <a href="#">33132</a> | <a href="#">33143</a> | <a href="#">33154</a> | <a href="#">33165</a> | <a href="#">33176</a> | <a href="#">33187</a> |
|                                                     | (33111) | AAGCTATTAATTCTGGTTAGATTTATATAGTCGTCAATATCCTCGGGCGTGGTTTGCGTCATGTCTGTAAACGTGC     |                       |                       |                       |                       |                       |                       |                       |
| SARS-CoV-2 NC_045512.2                              | (1)     | -----                                                                            |                       |                       |                       |                       |                       |                       |                       |
| Section 432                                         |         |                                                                                  |                       |                       |                       |                       |                       |                       |                       |
| Autographa californica nucleopolyhedrovirus NC 0... | (33188) | <a href="#">33188</a>                                                            | <a href="#">33198</a> | <a href="#">33209</a> | <a href="#">33220</a> | <a href="#">33231</a> | <a href="#">33242</a> | <a href="#">33253</a> | <a href="#">33264</a> |
|                                                     | (33188) | AAAATCAAACATTTTTATGTTGTAGTCGAATCTAACAAATCCATCGGCGTTCACTTGCACCTTCGCGCTTTACAAAAC   |                       |                       |                       |                       |                       |                       |                       |
| SARS-CoV-2 NC_045512.2                              | (1)     | -----                                                                            |                       |                       |                       |                       |                       |                       |                       |
| Section 433                                         |         |                                                                                  |                       |                       |                       |                       |                       |                       |                       |
| Autographa californica nucleopolyhedrovirus NC 0... | (33265) | <a href="#">33265</a>                                                            | <a href="#">33275</a> | <a href="#">33286</a> | <a href="#">33297</a> | <a href="#">33308</a> | <a href="#">33319</a> | <a href="#">33330</a> | <a href="#">33341</a> |
|                                                     | (33265) | GAGGTAGCGTGTAATCGAACCCGTTTAAATAGATTGCGTACAAAACCAGCACTTCATCTTCCAGTTTGACGCTTGC     |                       |                       |                       |                       |                       |                       |                       |
| SARS-CoV-2 NC_045512.2                              | (1)     | -----                                                                            |                       |                       |                       |                       |                       |                       |                       |
| Section 434                                         |         |                                                                                  |                       |                       |                       |                       |                       |                       |                       |
| Autographa californica nucleopolyhedrovirus NC 0... | (33342) | <a href="#">33342</a>                                                            | <a href="#">33352</a> | <a href="#">33363</a> | <a href="#">33374</a> | <a href="#">33385</a> | <a href="#">33396</a> | <a href="#">33407</a> | <a href="#">33418</a> |
|                                                     | (33342) | GGCAAAAATTGTGTGGTGTGCTCCAACCGGGTGACAAACATGACTATGGAAAATAACGCGGAATTCAACAGACGACT    |                       |                       |                       |                       |                       |                       |                       |
| SARS-CoV-2 NC_045512.2                              | (1)     | -----                                                                            |                       |                       |                       |                       |                       |                       |                       |

## SARS-CoV-2 &amp; Autographa californica nucleopolyhedrovirus.apr

|                                                     |         |                                                                                |       |       |       |       |       |       |       |
|-----------------------------------------------------|---------|--------------------------------------------------------------------------------|-------|-------|-------|-------|-------|-------|-------|
|                                                     |         | Section 435                                                                    |       |       |       |       |       |       |       |
| Autographa californica nucleopolyhedrovirus NC 0... | (33419) | 33419                                                                          | 33429 | 33440 | 33451 | 33462 | 33473 | 33484 | 33495 |
|                                                     | (33419) | AGAGTACGTGGGCACGATCGCCACAATGATGAAACGAACATTGAACGTTTTACGACAGCAGGGCTATTGCACGCAAC  |       |       |       |       |       |       |       |
| SARS-CoV-2 NC_045512.2                              | (1)     | -----                                                                          |       |       |       |       |       |       |       |
|                                                     |         | Section 436                                                                    |       |       |       |       |       |       |       |
| Autographa californica nucleopolyhedrovirus NC 0... | (33496) | 33496                                                                          | 33506 | 33517 | 33528 | 33539 | 33550 | 33561 | 33572 |
|                                                     | (33496) | AGGATGCGGATTCTTTGTGCGTGTCTAGACGACACGGCGGCCTGGTTATGCGGCCGTTTGCCGACCTGCAATTTTGTA |       |       |       |       |       |       |       |
| SARS-CoV-2 NC_045512.2                              | (1)     | -----                                                                          |       |       |       |       |       |       |       |
|                                                     |         | Section 437                                                                    |       |       |       |       |       |       |       |
| Autographa californica nucleopolyhedrovirus NC 0... | (33573) | 33573                                                                          | 33583 | 33594 | 33605 | 33616 | 33627 | 33638 | 33649 |
|                                                     | (33573) | TCGTTCCGCGTGCACATCGACCAGTTTGAGCATCCAAATCCGGCGTTGGAATATTTTAAATTTGAAGAAAGTCTGGC  |       |       |       |       |       |       |       |
| SARS-CoV-2 NC_045512.2                              | (1)     | -----                                                                          |       |       |       |       |       |       |       |
|                                                     |         | Section 438                                                                    |       |       |       |       |       |       |       |
| Autographa californica nucleopolyhedrovirus NC 0... | (33650) | 33650                                                                          | 33660 | 33671 | 33682 | 33693 | 33704 | 33715 | 33726 |
|                                                     | (33650) | GCAACGCCAACACGTGGGCCCGCGTTACACGTACATGAATTACACGCTTTTTTAAAAACGTCGTGGCCCTCAAATTGG |       |       |       |       |       |       |       |
| SARS-CoV-2 NC_045512.2                              | (1)     | -----                                                                          |       |       |       |       |       |       |       |
|                                                     |         | Section 439                                                                    |       |       |       |       |       |       |       |
| Autographa californica nucleopolyhedrovirus NC 0... | (33727) | 33727                                                                          | 33737 | 33748 | 33759 | 33770 | 33781 | 33792 | 33803 |
|                                                     | (33727) | TCGTGTACACGCGCACGCTACAAGCTAACATGTACGCGGACGGGTTGCCGTATTTTGTGCAAAATTTTTCAGAAACA  |       |       |       |       |       |       |       |
| SARS-CoV-2 NC_045512.2                              | (1)     | -----                                                                          |       |       |       |       |       |       |       |
|                                                     |         | Section 440                                                                    |       |       |       |       |       |       |       |
| Autographa californica nucleopolyhedrovirus NC 0... | (33804) | 33804                                                                          | 33814 | 33825 | 33836 | 33847 | 33858 | 33869 | 33880 |
|                                                     | (33804) | AGCTACAAACATGTTCTGTGTATGTTAGAAAACCTTGGTGCGATACAAGTAGCGACATTATCAGTTTACGAACAAAT  |       |       |       |       |       |       |       |
| SARS-CoV-2 NC_045512.2                              | (1)     | -----                                                                          |       |       |       |       |       |       |       |
|                                                     |         | Section 441                                                                    |       |       |       |       |       |       |       |
| Autographa californica nucleopolyhedrovirus NC 0... | (33881) | 33881                                                                          | 33891 | 33902 | 33913 | 33924 | 33935 | 33946 | 33957 |
|                                                     | (33881) | TATTGAAGATACAATAAATGAACTCGTCGTCAATCACGTTGATTAGATAATGTCCGTGTTAAATGTGATATCTTAGA  |       |       |       |       |       |       |       |
| SARS-CoV-2 NC_045512.2                              | (1)     | -----                                                                          |       |       |       |       |       |       |       |

## SARS-CoV-2 &amp; Autographa californica nucleopolyhedrovirus.apr

|                                                                                |         |                                                                                 |       |       |       |       |       |       |       |
|--------------------------------------------------------------------------------|---------|---------------------------------------------------------------------------------|-------|-------|-------|-------|-------|-------|-------|
| Section 442                                                                    |         |                                                                                 |       |       |       |       |       |       |       |
| Autographa californica nucleopolyhedrovirus NC 045512.2 SARS-CoV-2 NC_045512.2 | (33958) | 33958                                                                           | 33968 | 33979 | 33990 | 34001 | 34012 | 34023 | 34034 |
|                                                                                | (33958) | TTACGAGCGCGCAATAACCATAGTTTAAATCGAAGAGAATAGCCGTCGCCACAATGGATAATTACAAATTGCAATTGC  |       |       |       |       |       |       |       |
|                                                                                | (1)     | -----                                                                           |       |       |       |       |       |       |       |
| Section 443                                                                    |         |                                                                                 |       |       |       |       |       |       |       |
| Autographa californica nucleopolyhedrovirus NC 045512.2 SARS-CoV-2 NC_045512.2 | (34035) | 34035                                                                           | 34045 | 34056 | 34067 | 34078 | 34089 | 34100 | 34111 |
|                                                                                | (34035) | AAGAATTTTTTGACCAAGCGCCCGACAACGACGATCCCAACTTTGAACATCAAACGCCCAATCTATTGGCGCATCAG   |       |       |       |       |       |       |       |
|                                                                                | (1)     | -----                                                                           |       |       |       |       |       |       |       |
| Section 444                                                                    |         |                                                                                 |       |       |       |       |       |       |       |
| Autographa californica nucleopolyhedrovirus NC 045512.2 SARS-CoV-2 NC_045512.2 | (34112) | 34112                                                                           | 34122 | 34133 | 34144 | 34155 | 34166 | 34177 | 34188 |
|                                                                                | (34112) | AAAAAAGGCATACAGTGGATGATTAACAGAGAAAAAACGGCCGGCCCAACGGCGGCGTGCTTGCCGACGACATGGG    |       |       |       |       |       |       |       |
|                                                                                | (1)     | -----                                                                           |       |       |       |       |       |       |       |
| Section 445                                                                    |         |                                                                                 |       |       |       |       |       |       |       |
| Autographa californica nucleopolyhedrovirus NC 045512.2 SARS-CoV-2 NC_045512.2 | (34189) | 34189                                                                           | 34199 | 34210 | 34221 | 34232 | 34243 | 34254 | 34265 |
|                                                                                | (34189) | ACTCGGCAAAACGCTCTCTGTGCTAATGTTAATCGCAAAAAACAACCTCTCTACAATTGAAAACCTCTAATAGTGTGTC |       |       |       |       |       |       |       |
|                                                                                | (1)     | -----                                                                           |       |       |       |       |       |       |       |
| Section 446                                                                    |         |                                                                                 |       |       |       |       |       |       |       |
| Autographa californica nucleopolyhedrovirus NC 045512.2 SARS-CoV-2 NC_045512.2 | (34266) | 34266                                                                           | 34276 | 34287 | 34298 | 34309 | 34320 | 34331 | 34342 |
|                                                                                | (34266) | CTTTGTCTTTAATCAATCATTGGGTAAACCGAAAAACAAGAAGCATGATTTAAATTTTAACATTTTAAAGTATTACAAA |       |       |       |       |       |       |       |
|                                                                                | (1)     | -----                                                                           |       |       |       |       |       |       |       |
| Section 447                                                                    |         |                                                                                 |       |       |       |       |       |       |       |
| Autographa californica nucleopolyhedrovirus NC 045512.2 SARS-CoV-2 NC_045512.2 | (34343) | 34343                                                                           | 34353 | 34364 | 34375 | 34386 | 34397 | 34408 | 34419 |
|                                                                                | (34343) | TCTTTGGATGCCGACACGGTTGAGCATTACCACATTGTGGTGACCACGTACGACGTTTTATTGGCACATTTCAAATT   |       |       |       |       |       |       |       |
|                                                                                | (1)     | -----                                                                           |       |       |       |       |       |       |       |
| Section 448                                                                    |         |                                                                                 |       |       |       |       |       |       |       |
| Autographa californica nucleopolyhedrovirus NC 045512.2 SARS-CoV-2 NC_045512.2 | (34420) | 34420                                                                           | 34430 | 34441 | 34452 | 34463 | 34474 | 34485 | 34496 |
|                                                                                | (34420) | GATCAAAACAAAATAAACAGTCAAGTCTGTTTTCAACCCGCTGGCATCGAGTTGTTCTAGATGAAGCGCATATTATCA  |       |       |       |       |       |       |       |
|                                                                                | (1)     | -----                                                                           |       |       |       |       |       |       |       |



## SARS-CoV-2 &amp; Autographa californica nucleopolyhedrovirus.apr

|                                                     |         |                                                                                |       |       |       |       |       |       |       |
|-----------------------------------------------------|---------|--------------------------------------------------------------------------------|-------|-------|-------|-------|-------|-------|-------|
|                                                     |         | Section 449                                                                    |       |       |       |       |       |       |       |
| Autographa californica nucleopolyhedrovirus NC 0... | (34497) | 34497                                                                          | 34507 | 34518 | 34529 | 34540 | 34551 | 34562 | 34573 |
|                                                     | (34497) | AAAAC TGCAAGACGGGCGTGCACAACGCCGCGTGCGCTTTGACCGCAACAAACCGATGGTGCATTACCGGCACACCG |       |       |       |       |       |       |       |
|                                                     | (1)     | -----                                                                          |       |       |       |       |       |       |       |
|                                                     |         | Section 450                                                                    |       |       |       |       |       |       |       |
| Autographa californica nucleopolyhedrovirus NC 0... | (34574) | 34574                                                                          | 34584 | 34595 | 34606 | 34617 | 34628 | 34639 | 34650 |
|                                                     | (34574) | ATCCACAACAAGCATTGGGACATGTACTCGATGATTAATTTTTTGAATGTCGTCCTTTTAACAATCCAAGAGTGTG   |       |       |       |       |       |       |       |
|                                                     | (1)     | -----                                                                          |       |       |       |       |       |       |       |
|                                                     |         | Section 451                                                                    |       |       |       |       |       |       |       |
| Autographa californica nucleopolyhedrovirus NC 0... | (34651) | 34651                                                                          | 34661 | 34672 | 34683 | 34694 | 34705 | 34716 | 34727 |
|                                                     | (34651) | GAAAATGTTAAATAAAAACAACGACTCTACAAATCGCATAAAAAGTATTATTAAAAAAATTGTTTTAAACGCGACA   |       |       |       |       |       |       |       |
|                                                     | (1)     | -----                                                                          |       |       |       |       |       |       |       |
|                                                     |         | Section 452                                                                    |       |       |       |       |       |       |       |
| Autographa californica nucleopolyhedrovirus NC 0... | (34728) | 34728                                                                          | 34738 | 34749 | 34760 | 34771 | 34782 | 34793 | 34804 |
|                                                     | (34728) | AATCTGAAATTTCTTCTAACATTCTTAAACACACGGTTGAGTATGTACATGTTAATTTTAATGAAGAAGAAAAACG   |       |       |       |       |       |       |       |
|                                                     | (1)     | -----                                                                          |       |       |       |       |       |       |       |
|                                                     |         | Section 453                                                                    |       |       |       |       |       |       |       |
| Autographa californica nucleopolyhedrovirus NC 0... | (34805) | 34805                                                                          | 34815 | 34826 | 34837 | 34848 | 34859 | 34870 | 34881 |
|                                                     | (34805) | TTGTACGATAAATTAAAGTGTGAATCGGAAGAGGCGTATGTGAAGGCTGTGGCAGCGCGTGAAAACGAAAACGCACT  |       |       |       |       |       |       |       |
|                                                     | (1)     | -----                                                                          |       |       |       |       |       |       |       |
|                                                     |         | Section 454                                                                    |       |       |       |       |       |       |       |
| Autographa californica nucleopolyhedrovirus NC 0... | (34882) | 34882                                                                          | 34892 | 34903 | 34914 | 34925 | 34936 | 34947 | 34958 |
|                                                     | (34882) | AAGCCGATTGCAGCAAATGCAGCACGTGTTATGGCTAATACTGAAATTGAGGCAAATCTGCTGCCACCCGTATTTGG  |       |       |       |       |       |       |       |
|                                                     | (1)     | -----                                                                          |       |       |       |       |       |       |       |
|                                                     |         | Section 455                                                                    |       |       |       |       |       |       |       |
| Autographa californica nucleopolyhedrovirus NC 0... | (34959) | 34959                                                                          | 34969 | 34980 | 34991 | 35002 | 35013 | 35024 | 35035 |
|                                                     | (34959) | CCATGCACGGTAAAAATATTTTGGAAACAAACGACTGTTTTAAATGGATTATATGAGCAGCAAGTGCAAACGAGTG   |       |       |       |       |       |       |       |
|                                                     | (1)     | -----                                                                          |       |       |       |       |       |       |       |

## SARS-CoV-2 &amp; Autographa californica nucleopolyhedrovirus.apr

|                                                     |         |                                                                                 |       |       |       |       |       |       |       |
|-----------------------------------------------------|---------|---------------------------------------------------------------------------------|-------|-------|-------|-------|-------|-------|-------|
|                                                     |         | Section 456                                                                     |       |       |       |       |       |       |       |
| Autographa californica nucleopolyhedrovirus NC 0... | (35036) | 35036                                                                           | 35046 | 35057 | 35068 | 35079 | 35090 | 35101 | 35112 |
|                                                     | (35036) | CTCGACTTGGTAGACGACATTTTGAACACAAGCAACGACAAGATAATATTGGTTTCGCAATGGGTGGAATATTTAAA   |       |       |       |       |       |       |       |
|                                                     | (1)     | -----                                                                           |       |       |       |       |       |       |       |
|                                                     |         | Section 457                                                                     |       |       |       |       |       |       |       |
| Autographa californica nucleopolyhedrovirus NC 0... | (35113) | 35113                                                                           | 35123 | 35134 | 35145 | 35156 | 35167 | 35178 | 35189 |
|                                                     | (35113) | AATATTTGAAAACTTTTTTAAACAAAAAACATTGCTACGTTAATGTACACGGGCCAATTAAGTGAAGACAGGA       |       |       |       |       |       |       |       |
|                                                     | (1)     | -----                                                                           |       |       |       |       |       |       |       |
|                                                     |         | Section 458                                                                     |       |       |       |       |       |       |       |
| Autographa californica nucleopolyhedrovirus NC 0... | (35190) | 35190                                                                           | 35200 | 35211 | 35222 | 35233 | 35244 | 35255 | 35266 |
|                                                     | (35190) | TTTTGGCCGAGACGACATTCAATGATGCTGCCAATACTCAACATCGAATTTTGCTGCTTTCCATTAAAGTGC GGCGGC |       |       |       |       |       |       |       |
|                                                     | (1)     | -----                                                                           |       |       |       |       |       |       |       |
|                                                     |         | Section 459                                                                     |       |       |       |       |       |       |       |
| Autographa californica nucleopolyhedrovirus NC 0... | (35267) | 35267                                                                           | 35277 | 35288 | 35299 | 35310 | 35321 | 35332 | 35343 |
|                                                     | (35267) | GTCGGGTTAAACTTAATAGGCGGAAACCACATTGTAATGTTGGAGCCTCATTGGAACCCGCAAAATTGAATTGCAGGC  |       |       |       |       |       |       |       |
|                                                     | (1)     | -----                                                                           |       |       |       |       |       |       |       |
|                                                     |         | Section 460                                                                     |       |       |       |       |       |       |       |
| Autographa californica nucleopolyhedrovirus NC 0... | (35344) | 35344                                                                           | 35354 | 35365 | 35376 | 35387 | 35398 | 35409 | 35420 |
|                                                     | (35344) | GCAAGACCGAATCAGTCGTATGGGACAAACAAAAACACGTACGTGTACAAGATGCTAAATGTGGAAGACAACAGCA    |       |       |       |       |       |       |       |
|                                                     | (1)     | -----                                                                           |       |       |       |       |       |       |       |
|                                                     |         | Section 461                                                                     |       |       |       |       |       |       |       |
| Autographa californica nucleopolyhedrovirus NC 0... | (35421) | 35421                                                                           | 35431 | 35442 | 35453 | 35464 | 35475 | 35486 | 35497 |
|                                                     | (35421) | TCGAAAAATACATTAAACAACGCCAAGACAAAAAGATTGCGTTTGTCAACACGGTCTTTGAAGAGACTCTGCTCAAT   |       |       |       |       |       |       |       |
|                                                     | (1)     | -----                                                                           |       |       |       |       |       |       |       |
|                                                     |         | Section 462                                                                     |       |       |       |       |       |       |       |
| Autographa californica nucleopolyhedrovirus NC 0... | (35498) | 35498                                                                           | 35508 | 35519 | 35530 | 35541 | 35552 | 35563 | 35574 |
|                                                     | (35498) | TACGAAGACATTAAAAAATTTTCAACTTGTAGCTGGTAAGTCGTCATGAACACCCGATATGCTACTTGCTATGTTT    |       |       |       |       |       |       |       |
|                                                     | (1)     | -----                                                                           |       |       |       |       |       |       |       |

## SARS-CoV-2 &amp; Autographa californica nucleopolyhedrovirus.apr

|                                                     |         |                                                                                |       |       |       |       |       |       |       |
|-----------------------------------------------------|---------|--------------------------------------------------------------------------------|-------|-------|-------|-------|-------|-------|-------|
|                                                     |         | Section 463                                                                    |       |       |       |       |       |       |       |
| Autographa californica nucleopolyhedrovirus NC 0... | (35575) | 35575                                                                          | 35585 | 35596 | 35607 | 35618 | 35629 | 35640 | 35651 |
|                                                     | (35575) | GCGACGAGTTGGTGTACTTGTTTAAGAAAACGTTTAGTAACATGTCCCCTTCGGCCGCTGCGTTTTACCAACGGCGC  |       |       |       |       |       |       |       |
| SARS-CoV-2 NC_045512.2                              | (1)     | -----                                                                          |       |       |       |       |       |       |       |
|                                                     |         | Section 464                                                                    |       |       |       |       |       |       |       |
| Autographa californica nucleopolyhedrovirus NC 0... | (35652) | 35652                                                                          | 35662 | 35673 | 35684 | 35695 | 35706 | 35717 | 35728 |
|                                                     | (35652) | ATGGCCATTGTTAAAAACGGTATCGTGCTGTGCCACGTTGTTTCGTGCGGAACATAAAATTGGCAACGGCGTTTCGAT |       |       |       |       |       |       |       |
| SARS-CoV-2 NC_045512.2                              | (1)     | -----                                                                          |       |       |       |       |       |       |       |
|                                                     |         | Section 465                                                                    |       |       |       |       |       |       |       |
| Autographa californica nucleopolyhedrovirus NC 0... | (35729) | 35729                                                                          | 35739 | 35750 | 35761 | 35772 | 35783 | 35794 | 35805 |
|                                                     | (35729) | TCCAATTTACCCCCACCGCGCTCAACAACATGCACGACGGTCGCGTTAAGACGCAAGCGCTTCGAGTTTTGGCCCCG  |       |       |       |       |       |       |       |
| SARS-CoV-2 NC_045512.2                              | (1)     | -----                                                                          |       |       |       |       |       |       |       |
|                                                     |         | Section 466                                                                    |       |       |       |       |       |       |       |
| Autographa californica nucleopolyhedrovirus NC 0... | (35806) | 35806                                                                          | 35816 | 35827 | 35838 | 35849 | 35860 | 35871 | 35882 |
|                                                     | (35806) | TCGCTACCTCCGCTGTACGACTCGACCGTCGATCGACACGGCTGCAAGGTGTTACGGTGCGGCGCTACAACAGACG   |       |       |       |       |       |       |       |
| SARS-CoV-2 NC_045512.2                              | (1)     | -----                                                                          |       |       |       |       |       |       |       |
|                                                     |         | Section 467                                                                    |       |       |       |       |       |       |       |
| Autographa californica nucleopolyhedrovirus NC 0... | (35883) | 35883                                                                          | 35893 | 35904 | 35915 | 35926 | 35937 | 35948 | 35959 |
|                                                     | (35883) | CGTAATCGACTTTGCGGGCATTGCAACAAAACGCTGGAAATCATTAACCGGATAGAACTTGCCGCTCAACACAG     |       |       |       |       |       |       |       |
| SARS-CoV-2 NC_045512.2                              | (1)     | -----                                                                          |       |       |       |       |       |       |       |
|                                                     |         | Section 468                                                                    |       |       |       |       |       |       |       |
| Autographa californica nucleopolyhedrovirus NC 0... | (35960) | 35960                                                                          | 35970 | 35981 | 35992 | 36003 | 36014 | 36025 | 36036 |
|                                                     | (35960) | AATGCAATGTGAAAGTTGTCGACAGTGCATGCATGCGTTGCAGAAAAAGTTTCGCAGTTTACCCCGCCGTTACCTAT  |       |       |       |       |       |       |       |
| SARS-CoV-2 NC_045512.2                              | (1)     | -----                                                                          |       |       |       |       |       |       |       |
|                                                     |         | Section 469                                                                    |       |       |       |       |       |       |       |
| Autographa californica nucleopolyhedrovirus NC 0... | (36037) | 36037                                                                          | 36047 | 36058 | 36069 | 36080 | 36091 | 36102 | 36113 |
|                                                     | (36037) | CTGCATTGCGGACATTGCTGTCTGTGCACCGACTGCGACGAAACGGTAAACGTGGACAACACGTGTCCTAAATGTAA  |       |       |       |       |       |       |       |
| SARS-CoV-2 NC_045512.2                              | (1)     | -----                                                                          |       |       |       |       |       |       |       |

## SARS-CoV-2 &amp; Autographa californica nucleopolyhedrovirus.apr

|                                                     |         |                                                                                 |       |       |       |       |       |       |       |
|-----------------------------------------------------|---------|---------------------------------------------------------------------------------|-------|-------|-------|-------|-------|-------|-------|
|                                                     |         | Section 470                                                                     |       |       |       |       |       |       |       |
| Autographa californica nucleopolyhedrovirus NC 0... | (36114) | 36114                                                                           | 36124 | 36135 | 36146 | 36157 | 36168 | 36179 | 36190 |
|                                                     | (36114) | AAGCGGCATTAGATATAAATTAAAAATACAAAACCTTTGTAACATGTTGCCCTACGAAATGGTGATTGCCGTGTTGGTT |       |       |       |       |       |       |       |
|                                                     | (1)     | -----                                                                           |       |       |       |       |       |       |       |
|                                                     |         | Section 471                                                                     |       |       |       |       |       |       |       |
| Autographa californica nucleopolyhedrovirus NC 0... | (36191) | 36191                                                                           | 36201 | 36212 | 36223 | 36234 | 36245 | 36256 | 36267 |
|                                                     | (36191) | TACTTGTCGCCGGCGCAGATTCTAAATTTAAACCTTCCTTTTGCATACCAAAAAAGTGCTGTTTGCCAGCAACTC     |       |       |       |       |       |       |       |
|                                                     | (1)     | -----                                                                           |       |       |       |       |       |       |       |
|                                                     |         | Section 472                                                                     |       |       |       |       |       |       |       |
| Autographa californica nucleopolyhedrovirus NC 0... | (36268) | 36268                                                                           | 36278 | 36289 | 36300 | 36311 | 36322 | 36333 | 36344 |
|                                                     | (36268) | TGCAAAAGTTAACGAACGCATCAGGCGGCGAGCGCGTGACGACAACGACGACGACCCCTATTTTTACTACAAACAGT   |       |       |       |       |       |       |       |
|                                                     | (1)     | -----                                                                           |       |       |       |       |       |       |       |
|                                                     |         | Section 473                                                                     |       |       |       |       |       |       |       |
| Autographa californica nucleopolyhedrovirus NC 0... | (36345) | 36345                                                                           | 36355 | 36366 | 36377 | 36388 | 36399 | 36410 | 36421 |
|                                                     | (36345) | TCATAAAGATTAATTTTTTAACTAAAAAAATAATAAATGTTTATAATAAACTGAAAAGTGATTAGAGCGACGTTT     |       |       |       |       |       |       |       |
|                                                     | (1)     | -----                                                                           |       |       |       |       |       |       |       |
|                                                     |         | Section 474                                                                     |       |       |       |       |       |       |       |
| Autographa californica nucleopolyhedrovirus NC 0... | (36422) | 36422                                                                           | 36432 | 36443 | 36454 | 36465 | 36476 | 36487 | 36498 |
|                                                     | (36422) | GATGGTCGGTATGTGGTTACACGCGACGTTTTAATGTGCTTTGTAAACAAGAGTTATATGAAGCAATTGCTGCGCGA   |       |       |       |       |       |       |       |
|                                                     | (1)     | -----                                                                           |       |       |       |       |       |       |       |
|                                                     |         | Section 475                                                                     |       |       |       |       |       |       |       |
| Autographa californica nucleopolyhedrovirus NC 0... | (36499) | 36499                                                                           | 36509 | 36520 | 36531 | 36542 | 36553 | 36564 | 36575 |
|                                                     | (36499) | GGTTGACACTCGCATTACACTACAGCAACTTGTTAAATGTATAGTCCAGAATTTGGTTTTTATGTAAATAGCAAAA    |       |       |       |       |       |       |       |
|                                                     | (1)     | -----                                                                           |       |       |       |       |       |       |       |
|                                                     |         | Section 476                                                                     |       |       |       |       |       |       |       |
| Autographa californica nucleopolyhedrovirus NC 0... | (36576) | 36576                                                                           | 36586 | 36597 | 36608 | 36619 | 36630 | 36641 | 36652 |
|                                                     | (36576) | TTATGTTTGTGTTAACTGAATCGGTGTTGGCGTCTATTTGTTTAAACACTCGTTTCGGCAAATGCGAGTGGTTGGAC   |       |       |       |       |       |       |       |
|                                                     | (1)     | -----                                                                           |       |       |       |       |       |       |       |

## SARS-CoV-2 &amp; Autographa californica nucleopolyhedrovirus.apr

|                                                                                |         |                                                                                |       |       |       |       |       |       |       |
|--------------------------------------------------------------------------------|---------|--------------------------------------------------------------------------------|-------|-------|-------|-------|-------|-------|-------|
| Section 477                                                                    |         |                                                                                |       |       |       |       |       |       |       |
| Autographa californica nucleopolyhedrovirus NC 045512.2 SARS-CoV-2 NC_045512.2 | (36653) | 36653                                                                          | 36663 | 36674 | 36685 | 36696 | 36707 | 36718 | 36729 |
|                                                                                | (36653) | AAAAATATAAAACTGTGTGTTTACAATTAAGAAAAATTTGTATTAATAATAAGCAACATTTCGACATGTCTATCGTA  |       |       |       |       |       |       |       |
|                                                                                | (1)     | -----                                                                          |       |       |       |       |       |       |       |
| Section 478                                                                    |         |                                                                                |       |       |       |       |       |       |       |
| Autographa californica nucleopolyhedrovirus NC 045512.2 SARS-CoV-2 NC_045512.2 | (36730) | 36730                                                                          | 36740 | 36751 | 36762 | 36773 | 36784 | 36795 | 36806 |
|                                                                                | (36730) | TTGATTATTGTCATAGTTGTAATATTTTAAATATGTTTTTTGTACCTATCAAATAGCAATAATAAAAATGATGCCAA  |       |       |       |       |       |       |       |
|                                                                                | (1)     | -----                                                                          |       |       |       |       |       |       |       |
| Section 479                                                                    |         |                                                                                |       |       |       |       |       |       |       |
| Autographa californica nucleopolyhedrovirus NC 045512.2 SARS-CoV-2 NC_045512.2 | (36807) | 36807                                                                          | 36817 | 36828 | 36839 | 36850 | 36861 | 36872 | 36883 |
|                                                                                | (36807) | TAAAAACAATGCTTTTATTGATCTCAATCCCTTGCCGCTCAATGCTACAACCGCTACTACTACCACTGCCGTTGCTA  |       |       |       |       |       |       |       |
|                                                                                | (1)     | -----                                                                          |       |       |       |       |       |       |       |
| Section 480                                                                    |         |                                                                                |       |       |       |       |       |       |       |
| Autographa californica nucleopolyhedrovirus NC 045512.2 SARS-CoV-2 NC_045512.2 | (36884) | 36884                                                                          | 36894 | 36905 | 36916 | 36927 | 36938 | 36949 | 36960 |
|                                                                                | (36884) | CCACCACTACCAACAACAACAACAGCATAGTGGCCTTTCGGCAAAACAACATTCAAGAACTACAAAACCTTTGAACGA |       |       |       |       |       |       |       |
|                                                                                | (1)     | -----                                                                          |       |       |       |       |       |       |       |
| Section 481                                                                    |         |                                                                                |       |       |       |       |       |       |       |
| Autographa californica nucleopolyhedrovirus NC 045512.2 SARS-CoV-2 NC_045512.2 | (36961) | 36961                                                                          | 36971 | 36982 | 36993 | 37004 | 37015 | 37026 | 37037 |
|                                                                                | (36961) | TGGTTCAAAAATAATCTCTCATATTCGTTTAGCCAAAAAGCTGAAAAGGTGGTAAATCCCAATAGAAATTGGAACGA  |       |       |       |       |       |       |       |
|                                                                                | (1)     | -----                                                                          |       |       |       |       |       |       |       |
| Section 482                                                                    |         |                                                                                |       |       |       |       |       |       |       |
| Autographa californica nucleopolyhedrovirus NC 045512.2 SARS-CoV-2 NC_045512.2 | (37038) | 37038                                                                          | 37048 | 37059 | 37070 | 37081 | 37092 | 37103 | 37114 |
|                                                                                | (37038) | CAACACGGTATTTGACAATTTGAGTCCGTGGACAAGCGTTCGGACTTTGGTACCGTGTGCCACACGCTCATAGGGT   |       |       |       |       |       |       |       |
|                                                                                | (1)     | -----                                                                          |       |       |       |       |       |       |       |
| Section 483                                                                    |         |                                                                                |       |       |       |       |       |       |       |
| Autographa californica nucleopolyhedrovirus NC 045512.2 SARS-CoV-2 NC_045512.2 | (37115) | 37115                                                                          | 37125 | 37136 | 37147 | 37158 | 37169 | 37180 | 37191 |
|                                                                                | (37115) | ATTGCGTACGCTACAACAACACCAGCGACACGTTATACCAGAACCCCTGAATTGGCTTACAATCTCATTAACGGGCTG |       |       |       |       |       |       |       |
|                                                                                | (1)     | -----                                                                          |       |       |       |       |       |       |       |

## SARS-CoV-2 &amp; Autographa californica nucleopolyhedrovirus.apr

|                                                     |         |                                                                                |       |       |       |       |       |       |       |
|-----------------------------------------------------|---------|--------------------------------------------------------------------------------|-------|-------|-------|-------|-------|-------|-------|
|                                                     |         | Section 484                                                                    |       |       |       |       |       |       |       |
| Autographa californica nucleopolyhedrovirus NC 0... | (37192) | 37192                                                                          | 37202 | 37213 | 37224 | 37235 | 37246 | 37257 | 37268 |
|                                                     | (37192) | CGCATCATTTCAGCAAAC TGCCGATCCGCGCCGCACCAACAAGCGCCCTGGGGCCCGGTCGCCGATTGGTACCA    |       |       |       |       |       |       |       |
|                                                     | (1)     | -----                                                                          |       |       |       |       |       |       |       |
|                                                     |         | Section 485                                                                    |       |       |       |       |       |       |       |
| Autographa californica nucleopolyhedrovirus NC 0... | (37269) | 37269                                                                          | 37279 | 37290 | 37301 | 37312 | 37323 | 37334 | 37345 |
|                                                     | (37269) | TTTCACAATCACAATGCCGAGGTGTTTATGAACATTACCATTGTGCTAAACGAAACGCAGCATTACGACGAAGCTG   |       |       |       |       |       |       |       |
|                                                     | (1)     | -----                                                                          |       |       |       |       |       |       |       |
|                                                     |         | Section 486                                                                    |       |       |       |       |       |       |       |
| Autographa californica nucleopolyhedrovirus NC 0... | (37346) | 37346                                                                          | 37356 | 37367 | 37378 | 37389 | 37400 | 37411 | 37422 |
|                                                     | (37346) | CGTCCCTCACGCGTTACTGGCTCGGCTTGATCTGCCACGGCCGTCAACTCGATGGGCTGGCACCGGACGGCAGGC    |       |       |       |       |       |       |       |
|                                                     | (1)     | -----                                                                          |       |       |       |       |       |       |       |
|                                                     |         | Section 487                                                                    |       |       |       |       |       |       |       |
| Autographa californica nucleopolyhedrovirus NC 0... | (37423) | 37423                                                                          | 37433 | 37444 | 37455 | 37466 | 37477 | 37488 | 37499 |
|                                                     | (37423) | AACTCAATGCGCATGGGTGTGCCCTACACGTACAGTCAAATCTTGCGCGGATATTCATTGGCGCAAATTAGGCAAGA  |       |       |       |       |       |       |       |
|                                                     | (1)     | -----                                                                          |       |       |       |       |       |       |       |
|                                                     |         | Section 488                                                                    |       |       |       |       |       |       |       |
| Autographa californica nucleopolyhedrovirus NC 0... | (37500) | 37500                                                                          | 37510 | 37521 | 37532 | 37543 | 37554 | 37565 | 37576 |
|                                                     | (37500) | GCAGGGAATACAAGAAATCCTAAACACGATCGCGTTTCCGTACGTGACTCAAGGCAACGGCTTGCACGTCGATTCTGA |       |       |       |       |       |       |       |
|                                                     | (1)     | -----                                                                          |       |       |       |       |       |       |       |
|                                                     |         | Section 489                                                                    |       |       |       |       |       |       |       |
| Autographa californica nucleopolyhedrovirus NC 0... | (37577) | 37577                                                                          | 37587 | 37598 | 37609 | 37620 | 37631 | 37642 | 37653 |
|                                                     | (37577) | TATACATCGATCACATTGACGTGCGCGCTTACGGCTATTTGATAAATTCATACTTTACGTTTGCCTATTACACGTAC  |       |       |       |       |       |       |       |
|                                                     | (1)     | -----                                                                          |       |       |       |       |       |       |       |
|                                                     |         | Section 490                                                                    |       |       |       |       |       |       |       |
| Autographa californica nucleopolyhedrovirus NC 0... | (37654) | 37654                                                                          | 37664 | 37675 | 37686 | 37697 | 37708 | 37719 | 37730 |
|                                                     | (37654) | TATTTTGGAGACGAGGTAATCAACACGGTGGGTTTGACGAGAGCCATCGAAAACGTGGGCAGTCCCGAGGGAGTTGT  |       |       |       |       |       |       |       |
|                                                     | (1)     | -----                                                                          |       |       |       |       |       |       |       |

## SARS-CoV-2 &amp; Autographa californica nucleopolyhedrovirus.apr

|                                                     |         |                                                                                |       |       |       |       |       |             |
|-----------------------------------------------------|---------|--------------------------------------------------------------------------------|-------|-------|-------|-------|-------|-------------|
|                                                     |         | Section 491                                                                    |       |       |       |       |       |             |
| Autographa californica nucleopolyhedrovirus NC 0... | (37731) | 37731                                                                          | 37741 | 37752 | 37763 | 37774 | 37785 | 37796 37807 |
|                                                     | (37731) | GGTGCCAGGCGTCATGTCTCGAAACGGCACGTTGTACTCTAACGTGATAGGCAACTTTATTACGTATCCGTTGGCCG  |       |       |       |       |       |             |
| SARS-CoV-2 NC_045512.2                              | (1)     | -----                                                                          |       |       |       |       |       |             |
|                                                     |         | Section 492                                                                    |       |       |       |       |       |             |
| Autographa californica nucleopolyhedrovirus NC 0... | (37808) | 37808                                                                          | 37818 | 37829 | 37840 | 37851 | 37862 | 37873 37884 |
|                                                     | (37808) | TCCATTTCGGCCGATTACTCCAAAGTGTGACCAACTTTCAAAAACATATTACGGTTCGGTTGTGGGCGTAACGAAT   |       |       |       |       |       |             |
| SARS-CoV-2 NC_045512.2                              | (1)     | -----                                                                          |       |       |       |       |       |             |
|                                                     |         | Section 493                                                                    |       |       |       |       |       |             |
| Autographa californica nucleopolyhedrovirus NC 0... | (37885) | 37885                                                                          | 37895 | 37906 | 37917 | 37928 | 37939 | 37950 37961 |
|                                                     | (37885) | AGGTTGGCTTACTACGAATCCGATCCACAAACAACATTCAAGCGCCCCTGTGGACCATGGCGCGGCATTGGAAT     |       |       |       |       |       |             |
| SARS-CoV-2 NC_045512.2                              | (1)     | -----                                                                          |       |       |       |       |       |             |
|                                                     |         | Section 494                                                                    |       |       |       |       |       |             |
| Autographa californica nucleopolyhedrovirus NC 0... | (37962) | 37962                                                                          | 37972 | 37983 | 37994 | 38005 | 38016 | 38027 38038 |
|                                                     | (37962) | TCGGCGCGGCAGAAATTATCAACTATAATGCCAACACGGTGTCGTTTGAGTCGGGTATTATTTTGCAAAGTTTGAACG |       |       |       |       |       |             |
| SARS-CoV-2 NC_045512.2                              | (1)     | -----                                                                          |       |       |       |       |       |             |
|                                                     |         | Section 495                                                                    |       |       |       |       |       |             |
| Autographa californica nucleopolyhedrovirus NC 0... | (38039) | 38039                                                                          | 38049 | 38060 | 38071 | 38082 | 38093 | 38104 38115 |
|                                                     | (38039) | GAATCATGCGCATCCCGTCGGGCACCACGTCCACGCAGTCGTTTCAGACCGACCATTGGCCAAACGGCTATAGCCAAA |       |       |       |       |       |             |
| SARS-CoV-2 NC_045512.2                              | (1)     | -----                                                                          |       |       |       |       |       |             |
|                                                     |         | Section 496                                                                    |       |       |       |       |       |             |
| Autographa californica nucleopolyhedrovirus NC 0... | (38116) | 38116                                                                          | 38126 | 38137 | 38148 | 38159 | 38170 | 38181 38192 |
|                                                     | (38116) | ACCGACACGGCCGGCGCCATTTTGGTGTACGCCAAGTTTGCGGAAATGAACAATTTGCAATTTAAATCGTGCACGTT  |       |       |       |       |       |             |
| SARS-CoV-2 NC_045512.2                              | (1)     | -----                                                                          |       |       |       |       |       |             |
|                                                     |         | Section 497                                                                    |       |       |       |       |       |             |
| Autographa californica nucleopolyhedrovirus NC 0... | (38193) | 38193                                                                          | 38203 | 38214 | 38225 | 38236 | 38247 | 38258 38269 |
|                                                     | (38193) | GTTCTACGATCACGGCATGTTCCAGCTATATTACAACATTGGCGTGGAACCAAACTCGCTCAACAACACAAACGGGC  |       |       |       |       |       |             |
| SARS-CoV-2 NC_045512.2                              | (1)     | -----                                                                          |       |       |       |       |       |             |

## SARS-CoV-2 &amp; Autographa californica nucleopolyhedrovirus.apr

|                                                                                   |         |                                                                                |       |       |       |       |       |       |             |
|-----------------------------------------------------------------------------------|---------|--------------------------------------------------------------------------------|-------|-------|-------|-------|-------|-------|-------------|
|                                                                                   |         |                                                                                |       |       |       |       |       |       | Section 498 |
| Autographa californica nucleopolyhedrovirus NC 045512.2<br>SARS-CoV-2 NC_045512.2 | (38270) | 38270                                                                          | 38280 | 38291 | 38302 | 38313 | 38324 | 38335 | 38346       |
|                                                                                   | (38270) | GGGTGATTGTGCTAAGCAGAGACACGTCGGTCAACACCAACGATTTGTCATTTGAAGCGCAAAGAATTAACAACAAC  |       |       |       |       |       |       |             |
|                                                                                   | (1)     | -----                                                                          |       |       |       |       |       |       |             |
|                                                                                   |         |                                                                                |       |       |       |       |       |       | Section 499 |
| Autographa californica nucleopolyhedrovirus NC 045512.2<br>SARS-CoV-2 NC_045512.2 | (38347) | 38347                                                                          | 38357 | 38368 | 38379 | 38390 | 38401 | 38412 | 38423       |
|                                                                                   | (38347) | AACTCGTCGGAAGGCACCACGTTCAACGGTGTGGTCTGTCATCGCGTTCCTATCACAAACATCAACGTGCCTTCTCT  |       |       |       |       |       |       |             |
|                                                                                   | (1)     | -----                                                                          |       |       |       |       |       |       |             |
|                                                                                   |         |                                                                                |       |       |       |       |       |       | Section 500 |
| Autographa californica nucleopolyhedrovirus NC 045512.2<br>SARS-CoV-2 NC_045512.2 | (38424) | 38424                                                                          | 38434 | 38445 | 38456 | 38467 | 38478 | 38489 | 38500       |
|                                                                                   | (38424) | GACCGTTTCAAGTCCCAATTCTAGCGTCGAAC TAGTCGAGCAGATAATTAGTTTTCAAACAATGTACACGGCCACGG |       |       |       |       |       |       |             |
|                                                                                   | (1)     | -----                                                                          |       |       |       |       |       |       |             |
|                                                                                   |         |                                                                                |       |       |       |       |       |       | Section 501 |
| Autographa californica nucleopolyhedrovirus NC 045512.2<br>SARS-CoV-2 NC_045512.2 | (38501) | 38501                                                                          | 38511 | 38522 | 38533 | 38544 | 38555 | 38566 | 38577       |
|                                                                                   | (38501) | CTTCGGCCTGTTACAAATTAAACGTCGAAGGTCATTCGGATTCCCTGAGAGCTTTTAGAGTTAATTCGACGAAAAC   |       |       |       |       |       |       |             |
|                                                                                   | (1)     | -----                                                                          |       |       |       |       |       |       |             |
|                                                                                   |         |                                                                                |       |       |       |       |       |       | Section 502 |
| Autographa californica nucleopolyhedrovirus NC 045512.2<br>SARS-CoV-2 NC_045512.2 | (38578) | 38578                                                                          | 38588 | 38599 | 38610 | 38621 | 38632 | 38643 | 38654       |
|                                                                                   | (38578) | ATTTATGTAAACGTGGGCAACGGCGTTAAAGCCCTGTTTAATTATCCCTGGGTAATGGTCAAAGAAAATAACAAAGT  |       |       |       |       |       |       |             |
|                                                                                   | (1)     | -----                                                                          |       |       |       |       |       |       |             |
|                                                                                   |         |                                                                                |       |       |       |       |       |       | Section 503 |
| Autographa californica nucleopolyhedrovirus NC 045512.2<br>SARS-CoV-2 NC_045512.2 | (38655) | 38655                                                                          | 38665 | 38676 | 38687 | 38698 | 38709 | 38720 | 38731       |
|                                                                                   | (38655) | GTCTTTTCATGTCGGCTAACGAAGACACTACTATACCATTTAGCGTTATAATGAATTCCTTCACCTCTATCGGCGAAC |       |       |       |       |       |       |             |
|                                                                                   | (1)     | -----                                                                          |       |       |       |       |       |       |             |
|                                                                                   |         |                                                                                |       |       |       |       |       |       | Section 504 |
| Autographa californica nucleopolyhedrovirus NC 045512.2<br>SARS-CoV-2 NC_045512.2 | (38732) | 38732                                                                          | 38742 | 38753 | 38764 | 38775 | 38786 | 38797 | 38808       |
|                                                                                   | (38732) | CAGCTTTGCAATACTCTCCATCAAATTGCTTTGTGTATGGAAACGGTTTCAAATTGAACAACAGCACGTTTGATTTA  |       |       |       |       |       |       |             |
|                                                                                   | (1)     | -----                                                                          |       |       |       |       |       |       |             |



## SARS-CoV-2 &amp; Autographa californica nucleopolyhedrovirus.apr

|                                                                                |         |                                                                                |       |       |       |       |       |       |       |
|--------------------------------------------------------------------------------|---------|--------------------------------------------------------------------------------|-------|-------|-------|-------|-------|-------|-------|
| Section 505                                                                    |         |                                                                                |       |       |       |       |       |       |       |
| Autographa californica nucleopolyhedrovirus NC 045512.2 SARS-CoV-2 NC_045512.2 | (38809) | 38809                                                                          | 38819 | 38830 | 38841 | 38852 | 38863 | 38874 | 38885 |
|                                                                                | (38809) | CAATTTATTTTTGAAATTGTGTAATTATTTAGGGAGAATGTGATATTCAAAGACTGACTGTTAACACAAAAGAC     |       |       |       |       |       |       |       |
|                                                                                | (1)     | -----                                                                          |       |       |       |       |       |       |       |
| Section 506                                                                    |         |                                                                                |       |       |       |       |       |       |       |
| Autographa californica nucleopolyhedrovirus NC 045512.2 SARS-CoV-2 NC_045512.2 | (38886) | 38886                                                                          | 38896 | 38907 | 38918 | 38929 | 38940 | 38951 | 38962 |
|                                                                                | (38886) | TGATATTGTTGTTGTTACAAAATAGATAATAAAACAAAAATAAATTAAATATTATTTATTTATTAACTGTTTAAAT   |       |       |       |       |       |       |       |
|                                                                                | (1)     | -----                                                                          |       |       |       |       |       |       |       |
| Section 507                                                                    |         |                                                                                |       |       |       |       |       |       |       |
| Autographa californica nucleopolyhedrovirus NC 045512.2 SARS-CoV-2 NC_045512.2 | (38963) | 38963                                                                          | 38973 | 38984 | 38995 | 39006 | 39017 | 39028 | 39039 |
|                                                                                | (38963) | TTTAATGCTAACGCGTACAAATCACGCTGTTCCGACGTGGACATGGAATTGCGCAGAAAAGTCTTGATAGTGTTCGAT |       |       |       |       |       |       |       |
|                                                                                | (1)     | -----                                                                          |       |       |       |       |       |       |       |
| Section 508                                                                    |         |                                                                                |       |       |       |       |       |       |       |
| Autographa californica nucleopolyhedrovirus NC 045512.2 SARS-CoV-2 NC_045512.2 | (39040) | 39040                                                                          | 39050 | 39061 | 39072 | 39083 | 39094 | 39105 | 39116 |
|                                                                                | (39040) | TTCTTCGCCGTCATCCACTTCCATATATTTGATTTCTTCTCGATTTGCATTTCCAAGTTTGCGTATTCTTGCAAAT   |       |       |       |       |       |       |       |
|                                                                                | (1)     | -----                                                                          |       |       |       |       |       |       |       |
| Section 509                                                                    |         |                                                                                |       |       |       |       |       |       |       |
| Autographa californica nucleopolyhedrovirus NC 045512.2 SARS-CoV-2 NC_045512.2 | (39117) | 39117                                                                          | 39127 | 39138 | 39149 | 39160 | 39171 | 39182 | 39193 |
|                                                                                | (39117) | AATAATCTAGTCGTTGGGCGACCTCGCCAATTTTAAATAATACATTATCCGACACCAAATGCCAGCGAGTGACTGTG  |       |       |       |       |       |       |       |
|                                                                                | (1)     | -----                                                                          |       |       |       |       |       |       |       |
| Section 510                                                                    |         |                                                                                |       |       |       |       |       |       |       |
| Autographa californica nucleopolyhedrovirus NC 045512.2 SARS-CoV-2 NC_045512.2 | (39194) | 39194                                                                          | 39204 | 39215 | 39226 | 39237 | 39248 | 39259 | 39270 |
|                                                                                | (39194) | CGCTCCATCATCCTGGCACTTTTTAATGTGAATATTTAAAGGTTGTTGCATATATATCGTTAAACGTTTATGTTTAC  |       |       |       |       |       |       |       |
|                                                                                | (1)     | -----                                                                          |       |       |       |       |       |       |       |
| Section 511                                                                    |         |                                                                                |       |       |       |       |       |       |       |
| Autographa californica nucleopolyhedrovirus NC 045512.2 SARS-CoV-2 NC_045512.2 | (39271) | 39271                                                                          | 39281 | 39292 | 39303 | 39314 | 39325 | 39336 | 39347 |
|                                                                                | (39271) | TTTCACGTTAGCTCGTTTCATTGATGTAAACATTTAGTTTTATAACAGCGTCGGTAATTTTATTTTTTAAAGTAAAC  |       |       |       |       |       |       |       |
|                                                                                | (1)     | -----                                                                          |       |       |       |       |       |       |       |

## SARS-CoV-2 &amp; Autographa californica nucleopolyhedrovirus.apr

|                                                     |         |                                                                                |       |       |       |       |       |       |             |
|-----------------------------------------------------|---------|--------------------------------------------------------------------------------|-------|-------|-------|-------|-------|-------|-------------|
|                                                     |         |                                                                                |       |       |       |       |       |       | Section 512 |
| Autographa californica nucleopolyhedrovirus NC 0... | (39348) | 39348                                                                          | 39358 | 39369 | 39380 | 39391 | 39402 | 39413 | 39424       |
|                                                     | (39348) | AGACCAAAATCAAAGGTGTCTTCGACAGGTACGATTATTTTCCCATTGACACTGTTTTTCGTGCACAGATATAATTTT |       |       |       |       |       |       |             |
|                                                     | (1)     | -----                                                                          |       |       |       |       |       |       |             |
|                                                     |         |                                                                                |       |       |       |       |       |       | Section 513 |
| Autographa californica nucleopolyhedrovirus NC 0... | (39425) | 39425                                                                          | 39435 | 39446 | 39457 | 39468 | 39479 | 39490 | 39501       |
|                                                     | (39425) | ATCACCGTTTATTATTTTGGCCAAACACACGTACTCGTTTCTTCTCAAGCCAACATTTCTAAACAATTCACTTTTC   |       |       |       |       |       |       |             |
|                                                     | (1)     | -----                                                                          |       |       |       |       |       |       |             |
|                                                     |         |                                                                                |       |       |       |       |       |       | Section 514 |
| Autographa californica nucleopolyhedrovirus NC 0... | (39502) | 39502                                                                          | 39512 | 39523 | 39534 | 39545 | 39556 | 39567 | 39578       |
|                                                     | (39502) | TATTATCGTGTACGCAATTAAAAGTAAACGAAGCGCTACAATTGTCGTATTCTATTACAATTCTGCGGCATTTATAA  |       |       |       |       |       |       |             |
|                                                     | (1)     | -----                                                                          |       |       |       |       |       |       |             |
|                                                     |         |                                                                                |       |       |       |       |       |       | Section 515 |
| Autographa californica nucleopolyhedrovirus NC 0... | (39579) | 39579                                                                          | 39589 | 39600 | 39611 | 39622 | 39633 | 39644 | 39655       |
|                                                     | (39579) | AATTTATTAATGTTGACGCAAATTCCATGCAGCGCATCCATTTTCGTACTGCAAATGCGGCGCAATTAAAAAATTTCC |       |       |       |       |       |       |             |
|                                                     | (1)     | -----                                                                          |       |       |       |       |       |       |             |
|                                                     |         |                                                                                |       |       |       |       |       |       | Section 516 |
| Autographa californica nucleopolyhedrovirus NC 0... | (39656) | 39656                                                                          | 39666 | 39677 | 39688 | 39699 | 39710 | 39721 | 39732       |
|                                                     | (39656) | TCGTCGTTGTTAACAATCTTGGGCGCTAAAAAGCACGCCAACACGCCCACGTCTTTAATGCAATATTCCAATTTGAA  |       |       |       |       |       |       |             |
|                                                     | (1)     | -----                                                                          |       |       |       |       |       |       |             |
|                                                     |         |                                                                                |       |       |       |       |       |       | Section 517 |
| Autographa californica nucleopolyhedrovirus NC 0... | (39733) | 39733                                                                          | 39743 | 39754 | 39765 | 39776 | 39787 | 39798 | 39809       |
|                                                     | (39733) | CGGCAGTTTCCTCGGACATGTATATTGTACGGTGGGCGCCAAAGGAGCGGCTTTAGCAAAATGACACAAGTAATCGC  |       |       |       |       |       |       |             |
|                                                     | (1)     | -----                                                                          |       |       |       |       |       |       |             |
|                                                     |         |                                                                                |       |       |       |       |       |       | Section 518 |
| Autographa californica nucleopolyhedrovirus NC 0... | (39810) | 39810                                                                          | 39820 | 39831 | 39842 | 39853 | 39864 | 39875 | 39886       |
|                                                     | (39810) | CCGCAAAAGTGTGCGTTACGGTTTGCTTTGCTTTGAGAACGGAAAAGTTTTTCGTTGTCCGCGCTCATCTGCACGTCC |       |       |       |       |       |       |             |
|                                                     | (1)     | -----                                                                          |       |       |       |       |       |       |             |

## SARS-CoV-2 &amp; Autographa californica nucleopolyhedrovirus.apr

|                                                     |         |                                                                                 |       |       |       |       |       |       |       |
|-----------------------------------------------------|---------|---------------------------------------------------------------------------------|-------|-------|-------|-------|-------|-------|-------|
|                                                     |         | Section 519                                                                     |       |       |       |       |       |       |       |
| Autographa californica nucleopolyhedrovirus NC 0... | (39887) | 39887                                                                           | 39897 | 39908 | 39919 | 39930 | 39941 | 39952 | 39963 |
|                                                     | (39887) | GCCGAGCCAATGTCGCCATTTGCTCTAAACTGCAGACCCTTCTTGGAACACGACACAATAATATCGTGGTCGAATTG   |       |       |       |       |       |       |       |
|                                                     | (1)     | -----                                                                           |       |       |       |       |       |       |       |
|                                                     |         | Section 520                                                                     |       |       |       |       |       |       |       |
| Autographa californica nucleopolyhedrovirus NC 0... | (39964) | 39964                                                                           | 39974 | 39985 | 39996 | 40007 | 40018 | 40029 | 40040 |
|                                                     | (39964) | CGTCATGTCTTTGCACACCTGCGCAAACCTCGACGCTCGACATGTGGACGACGCAATCGTAATCGCTATCCGGAATTC  |       |       |       |       |       |       |       |
|                                                     | (1)     | -----                                                                           |       |       |       |       |       |       |       |
|                                                     |         | Section 521                                                                     |       |       |       |       |       |       |       |
| Autographa californica nucleopolyhedrovirus NC 0... | (40041) | 40041                                                                           | 40051 | 40062 | 40073 | 40084 | 40095 | 40106 | 40117 |
|                                                     | (40041) | CCAAATGTTCCACGTCGATGCACATCAACTTGAGCGTGTCGTCAGATTCTATTGTCGTTGTTGAACACGAACGCC     |       |       |       |       |       |       |       |
|                                                     | (1)     | -----                                                                           |       |       |       |       |       |       |       |
|                                                     |         | Section 522                                                                     |       |       |       |       |       |       |       |
| Autographa californica nucleopolyhedrovirus NC 0... | (40118) | 40118                                                                           | 40128 | 40139 | 40150 | 40161 | 40172 | 40183 | 40194 |
|                                                     | (40118) | ATCACATCGCCCTGATCTTCCGCTTTCATCAGTACAGAGCTGCGCTCGTTAACGCATTTGACAATTTTACTTAACT    |       |       |       |       |       |       |       |
|                                                     | (1)     | -----                                                                           |       |       |       |       |       |       |       |
|                                                     |         | Section 523                                                                     |       |       |       |       |       |       |       |
| Autographa californica nucleopolyhedrovirus NC 0... | (40195) | 40195                                                                           | 40205 | 40216 | 40227 | 40238 | 40249 | 40260 | 40271 |
|                                                     | (40195) | GTTTATGGACACGTTGAGCGGCACGTTGCGGTCACATCTATATTTTTTGAAACCCCTCGGCGTGTAAGTTGCAACGACA |       |       |       |       |       |       |       |
|                                                     | (1)     | -----                                                                           |       |       |       |       |       |       |       |
|                                                     |         | Section 524                                                                     |       |       |       |       |       |       |       |
| Autographa californica nucleopolyhedrovirus NC 0... | (40272) | 40272                                                                           | 40282 | 40293 | 40304 | 40315 | 40326 | 40337 | 40348 |
|                                                     | (40272) | CGAGCGCGACATGCGAGGTGTCATAACCTGCATGCTTACGCCTCGATTATCACAATCAAAGTAGCGTGCGGCAGC     |       |       |       |       |       |       |       |
|                                                     | (1)     | -----                                                                           |       |       |       |       |       |       |       |
|                                                     |         | Section 525                                                                     |       |       |       |       |       |       |       |
| Autographa californica nucleopolyhedrovirus NC 0... | (40349) | 40349                                                                           | 40359 | 40370 | 40381 | 40392 | 40403 | 40414 | 40425 |
|                                                     | (40349) | AGATCCTTAAAAGTTTCCACCAGCCTCTTCAAAACTGCGCCGGTTTTAAATTCGCTTCGAACATTTTTCAGCAGTGA   |       |       |       |       |       |       |       |
|                                                     | (1)     | -----                                                                           |       |       |       |       |       |       |       |

## SARS-CoV-2 &amp; Autographa californica nucleopolyhedrovirus.apr

|                                                     |         |                                                                                |                       |                       |                       |                       |                       |                       |                       |
|-----------------------------------------------------|---------|--------------------------------------------------------------------------------|-----------------------|-----------------------|-----------------------|-----------------------|-----------------------|-----------------------|-----------------------|
|                                                     |         | Section 526                                                                    |                       |                       |                       |                       |                       |                       |                       |
| Autographa californica nucleopolyhedrovirus NC 0... | (40426) | <a href="#">40426</a>                                                          | <a href="#">40436</a> | <a href="#">40447</a> | <a href="#">40458</a> | <a href="#">40469</a> | <a href="#">40480</a> | <a href="#">40491</a> | <a href="#">40502</a> |
|                                                     | (40426) | TTCTAATTGCAGCTGCTCTTTGATACAAC TAATTTTACGACGACGATGCGAGCTTTTATTCAACCGAGCGTGCATGT |                       |                       |                       |                       |                       |                       |                       |
|                                                     | (1)     | -----                                                                          |                       |                       |                       |                       |                       |                       |                       |
|                                                     |         | Section 527                                                                    |                       |                       |                       |                       |                       |                       |                       |
| Autographa californica nucleopolyhedrovirus NC 0... | (40503) | <a href="#">40503</a>                                                          | <a href="#">40513</a> | <a href="#">40524</a> | <a href="#">40535</a> | <a href="#">40546</a> | <a href="#">40557</a> | <a href="#">40568</a> | <a href="#">40579</a> |
|                                                     | (40503) | TTGCAATCGTGCAAGCGTTATCAATTTTTCATTATCGTATTGTTGCACATCAACAGGCTGGACACCACGTTGAACTC  |                       |                       |                       |                       |                       |                       |                       |
|                                                     | (1)     | -----                                                                          |                       |                       |                       |                       |                       |                       |                       |
|                                                     |         | Section 528                                                                    |                       |                       |                       |                       |                       |                       |                       |
| Autographa californica nucleopolyhedrovirus NC 0... | (40580) | <a href="#">40580</a>                                                          | <a href="#">40590</a> | <a href="#">40601</a> | <a href="#">40612</a> | <a href="#">40623</a> | <a href="#">40634</a> | <a href="#">40645</a> | <a href="#">40656</a> |
|                                                     | (40580) | GCCGCAGTTTTGCGGCAAGTTGGACCCGCCGCGCATCCAATGCAAAC TTTCCGACATTCTGTTGCCTACGAACGATT |                       |                       |                       |                       |                       |                       |                       |
|                                                     | (1)     | -----                                                                          |                       |                       |                       |                       |                       |                       |                       |
|                                                     |         | Section 529                                                                    |                       |                       |                       |                       |                       |                       |                       |
| Autographa californica nucleopolyhedrovirus NC 0... | (40657) | <a href="#">40657</a>                                                          | <a href="#">40667</a> | <a href="#">40678</a> | <a href="#">40689</a> | <a href="#">40700</a> | <a href="#">40711</a> | <a href="#">40722</a> | <a href="#">40733</a> |
|                                                     | (40657) | GATTCTTTGTCCATTGATCGAAGCGAGTGCCTTCGACTTTTTTCGTGTCCAGTGTGGCTTGTTTTAATAAATTCTTTG |                       |                       |                       |                       |                       |                       |                       |
|                                                     | (1)     | -----                                                                          |                       |                       |                       |                       |                       |                       |                       |
|                                                     |         | Section 530                                                                    |                       |                       |                       |                       |                       |                       |                       |
| Autographa californica nucleopolyhedrovirus NC 0... | (40734) | <a href="#">40734</a>                                                          | <a href="#">40744</a> | <a href="#">40755</a> | <a href="#">40766</a> | <a href="#">40777</a> | <a href="#">40788</a> | <a href="#">40799</a> | <a href="#">40810</a> |
|                                                     | (40734) | AAAATATTGTCTGGGTGTATTATTAAATAGCATGTATGGTATGTTGAAGATGGGATAACGCTTGCGGTGCGGGTCGTC |                       |                       |                       |                       |                       |                       |                       |
|                                                     | (1)     | -----                                                                          |                       |                       |                       |                       |                       |                       |                       |
|                                                     |         | Section 531                                                                    |                       |                       |                       |                       |                       |                       |                       |
| Autographa californica nucleopolyhedrovirus NC 0... | (40811) | <a href="#">40811</a>                                                          | <a href="#">40821</a> | <a href="#">40832</a> | <a href="#">40843</a> | <a href="#">40854</a> | <a href="#">40865</a> | <a href="#">40876</a> | <a href="#">40887</a> |
|                                                     | (40811) | ATGATTTCCACCGCGCACCACATATTTGCGCTCAATTTTATCAAAATTGGACTGGCGAGACAAAAACGAGACGGGCG  |                       |                       |                       |                       |                       |                       |                       |
|                                                     | (1)     | -----                                                                          |                       |                       |                       |                       |                       |                       |                       |
|                                                     |         | Section 532                                                                    |                       |                       |                       |                       |                       |                       |                       |
| Autographa californica nucleopolyhedrovirus NC 0... | (40888) | <a href="#">40888</a>                                                          | <a href="#">40898</a> | <a href="#">40909</a> | <a href="#">40920</a> | <a href="#">40931</a> | <a href="#">40942</a> | <a href="#">40953</a> | <a href="#">40964</a> |
|                                                     | (40888) | ACAGGCATATTTGGGCGTGCGTACCATCTTCGGCCATCCACTCGGTCAGGTCTTCGCTGCGGTTAAACACACCTTTC  |                       |                       |                       |                       |                       |                       |                       |
|                                                     | (1)     | -----                                                                          |                       |                       |                       |                       |                       |                       |                       |

## SARS-CoV-2 &amp; Autographa californica nucleopolyhedrovirus.apr

|                                                     |         |                                                                                |       |       |       |       |       |             |
|-----------------------------------------------------|---------|--------------------------------------------------------------------------------|-------|-------|-------|-------|-------|-------------|
|                                                     |         | Section 533                                                                    |       |       |       |       |       |             |
| Autographa californica nucleopolyhedrovirus NC 0... | (40965) | 40965                                                                          | 40975 | 40986 | 40997 | 41008 | 41019 | 41030 41041 |
|                                                     | (40965) | TGACCGTGAATGCCACATATTTTTATTCTTCCAAATCGTTGGTGGACGTGACTATGACTATTTTAAGCATAACGTT   |       |       |       |       |       |             |
|                                                     | (1)     | -----                                                                          |       |       |       |       |       |             |
|                                                     |         | Section 534                                                                    |       |       |       |       |       |             |
| Autographa californica nucleopolyhedrovirus NC 0... | (41042) | 41042                                                                          | 41052 | 41063 | 41074 | 41085 | 41096 | 41107 41118 |
|                                                     | (41042) | GTCGCCGTTAACCACCATGCTGGCGTCGAGTTTTCAATTTTTTGATTTTAAATTTGTCTAAAGTAAACGTACACTT   |       |       |       |       |       |             |
|                                                     | (1)     | -----                                                                          |       |       |       |       |       |             |
|                                                     |         | Section 535                                                                    |       |       |       |       |       |             |
| Autographa californica nucleopolyhedrovirus NC 0... | (41119) | 41119                                                                          | 41129 | 41140 | 41151 | 41162 | 41173 | 41184 41195 |
|                                                     | (41119) | TGTAACGTTAAAATTGCCGTTGGTGCACGTTTCAATTTTGTACCGTCGGCCGTCGTACACCCAATTAATCTTTGCG   |       |       |       |       |       |             |
|                                                     | (1)     | -----                                                                          |       |       |       |       |       |             |
|                                                     |         | Section 536                                                                    |       |       |       |       |       |             |
| Autographa californica nucleopolyhedrovirus NC 0... | (41196) | 41196                                                                          | 41206 | 41217 | 41228 | 41239 | 41250 | 41261 41272 |
|                                                     | (41196) | TTGCTCACCAACACACCGGCCATGTACAGCACAAGTCCGTCGTCTAGCGCAACGTAATTTTTGTCGCTACTATTTCGT |       |       |       |       |       |             |
|                                                     | (1)     | -----                                                                          |       |       |       |       |       |             |
|                                                     |         | Section 537                                                                    |       |       |       |       |       |             |
| Autographa californica nucleopolyhedrovirus NC 0... | (41273) | 41273                                                                          | 41283 | 41294 | 41305 | 41316 | 41327 | 41338 41349 |
|                                                     | (41273) | AAACTTTACTAAACACGACTGCTTGGGGCCGACCACAAGCTTGCCCTTCAATTTGTTCACTTTGTTGTTGTATAAAC  |       |       |       |       |       |             |
|                                                     | (1)     | -----                                                                          |       |       |       |       |       |             |
|                                                     |         | Section 538                                                                    |       |       |       |       |       |             |
| Autographa californica nucleopolyhedrovirus NC 0... | (41350) | 41350                                                                          | 41360 | 41371 | 41382 | 41393 | 41404 | 41415 41426 |
|                                                     | (41350) | AAATGGGCAGCGCAATGTGCGGAATGTACGGATCTTCGGCGGTCATGAGTTTATTGTCTCGCACCAACGTCCACAAT  |       |       |       |       |       |             |
|                                                     | (1)     | -----                                                                          |       |       |       |       |       |             |
|                                                     |         | Section 539                                                                    |       |       |       |       |       |             |
| Autographa californica nucleopolyhedrovirus NC 0... | (41427) | 41427                                                                          | 41437 | 41448 | 41459 | 41470 | 41481 | 41492 41503 |
|                                                     | (41427) | TTAAACATTTTATTGTTGAGCAAAATGGACTTGTTTACCGCCACAGAGTAGCCATTTGGTAAACCCGATACGCAATT  |       |       |       |       |       |             |
|                                                     | (1)     | -----                                                                          |       |       |       |       |       |             |

## SARS-CoV-2 &amp; Autographa californica nucleopolyhedrovirus.apr

|                                                     |         |                                                                                |       |       |       |       |       |             |
|-----------------------------------------------------|---------|--------------------------------------------------------------------------------|-------|-------|-------|-------|-------|-------------|
|                                                     |         | Section 540                                                                    |       |       |       |       |       |             |
| Autographa californica nucleopolyhedrovirus NC 0... | (41504) | 41504                                                                          | 41514 | 41525 | 41536 | 41547 | 41558 | 41569 41580 |
|                                                     | (41504) | TTCCTCTTTGTACTCAAACACGGGCATGGCATTCTTTAGATTGGTTAGGGACACAATCAATTTGGGTACGGGCGTGG  |       |       |       |       |       |             |
|                                                     | (1)     | -----                                                                          |       |       |       |       |       |             |
|                                                     |         | Section 541                                                                    |       |       |       |       |       |             |
| Autographa californica nucleopolyhedrovirus NC 0... | (41581) | 41581                                                                          | 41591 | 41602 | 41613 | 41624 | 41635 | 41646 41657 |
|                                                     | (41581) | TATGAAATAAATGTATAAAATTACGATAATAATACTGCTCCAACCTTGGACATGAGCGATTTGACGTCATCGTTTTCT |       |       |       |       |       |             |
|                                                     | (1)     | -----                                                                          |       |       |       |       |       |             |
|                                                     |         | Section 542                                                                    |       |       |       |       |       |             |
| Autographa californica nucleopolyhedrovirus NC 0... | (41658) | 41658                                                                          | 41668 | 41679 | 41690 | 41701 | 41712 | 41723 41734 |
|                                                     | (41658) | ACGATCGTACACTGAATAATGGGATTATAGTATATAGAATGTTTATAGTGGTATTCGTAGGGTGTCAACAATACGTT  |       |       |       |       |       |             |
|                                                     | (1)     | -----                                                                          |       |       |       |       |       |             |
|                                                     |         | Section 543                                                                    |       |       |       |       |       |             |
| Autographa californica nucleopolyhedrovirus NC 0... | (41735) | 41735                                                                          | 41745 | 41756 | 41767 | 41778 | 41789 | 41800 41811 |
|                                                     | (41735) | AATGTCGGCTTCGTTGTTACCCGCAACTTTTTTTTGATGCATATCATTCCTTCGTGATGATTAACGTAAAGTATTC   |       |       |       |       |       |             |
|                                                     | (1)     | -----                                                                          |       |       |       |       |       |             |
|                                                     |         | Section 544                                                                    |       |       |       |       |       |             |
| Autographa californica nucleopolyhedrovirus NC 0... | (41812) | 41812                                                                          | 41822 | 41833 | 41844 | 41855 | 41866 | 41877 41888 |
|                                                     | (41812) | TGTCTGTAATCTTCAATTCGATGGGCGCCATGTTTCTTTTCATAGTGTACACGATAAACGACGTGTTTGATTTTAA   |       |       |       |       |       |             |
|                                                     | (1)     | -----                                                                          |       |       |       |       |       |             |
|                                                     |         | Section 545                                                                    |       |       |       |       |       |             |
| Autographa californica nucleopolyhedrovirus NC 0... | (41889) | 41889                                                                          | 41899 | 41910 | 41921 | 41932 | 41943 | 41954 41965 |
|                                                     | (41889) | CATTTTAAATTTGTGGGTCTATCATTAACGCGATCAGCAACGAGTCGTCTTGAACGTCGTTGAGGTCGTCCACGAA   |       |       |       |       |       |             |
|                                                     | (1)     | -----                                                                          |       |       |       |       |       |             |
|                                                     |         | Section 546                                                                    |       |       |       |       |       |             |
| Autographa californica nucleopolyhedrovirus NC 0... | (41966) | 41966                                                                          | 41976 | 41987 | 41998 | 42009 | 42020 | 42031 42042 |
|                                                     | (41966) | CGCGACCAGATTGTGTTTTAGCAAATATTGAAATTTTTGCGCAACCATTTTCGTAGTCCACGTTGGGCAAACATGCGT |       |       |       |       |       |             |
|                                                     | (1)     | -----                                                                          |       |       |       |       |       |             |

|                                                     |         |                                                                                |                       |                       |                       |                       |                       |                       |                       |
|-----------------------------------------------------|---------|--------------------------------------------------------------------------------|-----------------------|-----------------------|-----------------------|-----------------------|-----------------------|-----------------------|-----------------------|
|                                                     |         | Section 547                                                                    |                       |                       |                       |                       |                       |                       |                       |
| Autographa californica nucleopolyhedrovirus NC 0... | (42043) | <a href="#">42043</a>                                                          | <a href="#">42053</a> | <a href="#">42064</a> | <a href="#">42075</a> | <a href="#">42086</a> | <a href="#">42097</a> | <a href="#">42108</a> | <a href="#">42119</a> |
|                                                     | (42043) | TGCGGGCAAAGGAAAAACTTTTTGCCCGCCACGGTCATTTGCGCCGTGAAAAAACTGCCAATAAATTTACAAAATCC  |                       |                       |                       |                       |                       |                       |                       |
|                                                     | (1)     | -----                                                                          |                       |                       |                       |                       |                       |                       |                       |
|                                                     |         | Section 548                                                                    |                       |                       |                       |                       |                       |                       |                       |
| Autographa californica nucleopolyhedrovirus NC 0... | (42120) | <a href="#">42120</a>                                                          | <a href="#">42130</a> | <a href="#">42141</a> | <a href="#">42152</a> | <a href="#">42163</a> | <a href="#">42174</a> | <a href="#">42185</a> | <a href="#">42196</a> |
|                                                     | (42120) | TTTTTTTGCTTCAACATTTTCTGGCGCATGCTGTCGTTGGTGATTTCGCGCCACCTCGTTGCCGACGCGATATTTTAA |                       |                       |                       |                       |                       |                       |                       |
|                                                     | (1)     | -----                                                                          |                       |                       |                       |                       |                       |                       |                       |
|                                                     |         | Section 549                                                                    |                       |                       |                       |                       |                       |                       |                       |
| Autographa californica nucleopolyhedrovirus NC 0... | (42197) | <a href="#">42197</a>                                                          | <a href="#">42207</a> | <a href="#">42218</a> | <a href="#">42229</a> | <a href="#">42240</a> | <a href="#">42251</a> | <a href="#">42262</a> | <a href="#">42273</a> |
|                                                     | (42197) | CACGGGCAACGAAATTTCAATATTGTTATTGCTGCTGTTGTCCTGTTGATTGGGAAAGACTTTGCGTTGCTTGCTAA  |                       |                       |                       |                       |                       |                       |                       |
|                                                     | (1)     | -----                                                                          |                       |                       |                       |                       |                       |                       |                       |
|                                                     |         | Section 550                                                                    |                       |                       |                       |                       |                       |                       |                       |
| Autographa californica nucleopolyhedrovirus NC 0... | (42274) | <a href="#">42274</a>                                                          | <a href="#">42284</a> | <a href="#">42295</a> | <a href="#">42306</a> | <a href="#">42317</a> | <a href="#">42328</a> | <a href="#">42339</a> | <a href="#">42350</a> |
|                                                     | (42274) | AAGTTTTTCGATACGCAATATATGAGACGCCGTTGACTATACAATCGACAATCTTTTTCGACTCTTTGTTGTACAAG  |                       |                       |                       |                       |                       |                       |                       |
|                                                     | (1)     | -----                                                                          |                       |                       |                       |                       |                       |                       |                       |
|                                                     |         | Section 551                                                                    |                       |                       |                       |                       |                       |                       |                       |
| Autographa californica nucleopolyhedrovirus NC 0... | (42351) | <a href="#">42351</a>                                                          | <a href="#">42361</a> | <a href="#">42372</a> | <a href="#">42383</a> | <a href="#">42394</a> | <a href="#">42405</a> | <a href="#">42416</a> | <a href="#">42427</a> |
|                                                     | (42351) | ACGCTTTGAATTTTACGACGCTTGTTGCCACCGTGACGCGTCGTCGTCGGCCGTCTTGTCGAGAACTCGTTGATA    |                       |                       |                       |                       |                       |                       |                       |
|                                                     | (1)     | -----                                                                          |                       |                       |                       |                       |                       |                       |                       |
|                                                     |         | Section 552                                                                    |                       |                       |                       |                       |                       |                       |                       |
| Autographa californica nucleopolyhedrovirus NC 0... | (42428) | <a href="#">42428</a>                                                          | <a href="#">42438</a> | <a href="#">42449</a> | <a href="#">42460</a> | <a href="#">42471</a> | <a href="#">42482</a> | <a href="#">42493</a> | <a href="#">42504</a> |
|                                                     | (42428) | GTTTTGCAAAATTGTCGAAGTTAATAACAGTTCTATCAAATAGGCGTGCTTGATACAATTTTGTGGCCAAACTGT    |                       |                       |                       |                       |                       |                       |                       |
|                                                     | (1)     | -----                                                                          |                       |                       |                       |                       |                       |                       |                       |
|                                                     |         | Section 553                                                                    |                       |                       |                       |                       |                       |                       |                       |
| Autographa californica nucleopolyhedrovirus NC 0... | (42505) | <a href="#">42505</a>                                                          | <a href="#">42515</a> | <a href="#">42526</a> | <a href="#">42537</a> | <a href="#">42548</a> | <a href="#">42559</a> | <a href="#">42570</a> | <a href="#">42581</a> |
|                                                     | (42505) | CTATAGAATAGTTTATGTCGTGATTCAATAATTTTTATGTGTTCCACGAGTTGTTGCTTGTGAAGCGTGTTGTAT    |                       |                       |                       |                       |                       |                       |                       |
|                                                     | (1)     | -----                                                                          |                       |                       |                       |                       |                       |                       |                       |

## SARS-CoV-2 &amp; Autographa californica nucleopolyhedrovirus.apr

|                                                     |         |                                                                                |                       |                       |                       |                       |                       |                       |                       |
|-----------------------------------------------------|---------|--------------------------------------------------------------------------------|-----------------------|-----------------------|-----------------------|-----------------------|-----------------------|-----------------------|-----------------------|
|                                                     |         | Section 554                                                                    |                       |                       |                       |                       |                       |                       |                       |
| Autographa californica nucleopolyhedrovirus NC 0... | (42582) | <a href="#">42582</a>                                                          | <a href="#">42592</a> | <a href="#">42603</a> | <a href="#">42614</a> | <a href="#">42625</a> | <a href="#">42636</a> | <a href="#">42647</a> | <a href="#">42658</a> |
|                                                     | (42582) | TCGAAGAGAAAATCGAGCGGTTTCCATTGCGCTGTTGGCCAGATATGTTTCCAGCACAGAATTTAAATCTTCCGT    |                       |                       |                       |                       |                       |                       |                       |
|                                                     | (1)     | -----                                                                          |                       |                       |                       |                       |                       |                       |                       |
|                                                     |         | Section 555                                                                    |                       |                       |                       |                       |                       |                       |                       |
| Autographa californica nucleopolyhedrovirus NC 0... | (42659) | <a href="#">42659</a>                                                          | <a href="#">42669</a> | <a href="#">42680</a> | <a href="#">42691</a> | <a href="#">42702</a> | <a href="#">42713</a> | <a href="#">42724</a> | <a href="#">42735</a> |
|                                                     | (42659) | CACTACGTAATCGCTAGCGTACACGTCTCGAGCAAACAGGACGTCGTCTTGTGTTGTCGTAACTAGTTGGATTGCGC  |                       |                       |                       |                       |                       |                       |                       |
|                                                     | (1)     | -----                                                                          |                       |                       |                       |                       |                       |                       |                       |
|                                                     |         | Section 556                                                                    |                       |                       |                       |                       |                       |                       |                       |
| Autographa californica nucleopolyhedrovirus NC 0... | (42736) | <a href="#">42736</a>                                                          | <a href="#">42746</a> | <a href="#">42757</a> | <a href="#">42768</a> | <a href="#">42779</a> | <a href="#">42790</a> | <a href="#">42801</a> | <a href="#">42812</a> |
|                                                     | (42736) | GATTGATGTGCTTCTCTTGATCCACGTTGCCGTACAAAACATGCGTTTGCAATGTTTGGCGTATAGCTTGTCGTAG   |                       |                       |                       |                       |                       |                       |                       |
|                                                     | (1)     | -----                                                                          |                       |                       |                       |                       |                       |                       |                       |
|                                                     |         | Section 557                                                                    |                       |                       |                       |                       |                       |                       |                       |
| Autographa californica nucleopolyhedrovirus NC 0... | (42813) | <a href="#">42813</a>                                                          | <a href="#">42823</a> | <a href="#">42834</a> | <a href="#">42845</a> | <a href="#">42856</a> | <a href="#">42867</a> | <a href="#">42878</a> | <a href="#">42889</a> |
|                                                     | (42813) | AAATTGTGCACCAAACGTTGTTGTTTCATCATTATGTTGGGAAACTCAAAAATCTGCCGTCCAGCATAAAAGTTCC   |                       |                       |                       |                       |                       |                       |                       |
|                                                     | (1)     | -----                                                                          |                       |                       |                       |                       |                       |                       |                       |
|                                                     |         | Section 558                                                                    |                       |                       |                       |                       |                       |                       |                       |
| Autographa californica nucleopolyhedrovirus NC 0... | (42890) | <a href="#">42890</a>                                                          | <a href="#">42900</a> | <a href="#">42911</a> | <a href="#">42922</a> | <a href="#">42933</a> | <a href="#">42944</a> | <a href="#">42955</a> | <a href="#">42966</a> |
|                                                     | (42890) | GTTAATATTGTTGTTTGCCTCGACATCGTCCGTTTCTCTAAATTGCTTGTCTAAGCGCGTGCCGAATATAACGGGCA  |                       |                       |                       |                       |                       |                       |                       |
|                                                     | (1)     | -----                                                                          |                       |                       |                       |                       |                       |                       |                       |
|                                                     |         | Section 559                                                                    |                       |                       |                       |                       |                       |                       |                       |
| Autographa californica nucleopolyhedrovirus NC 0... | (42967) | <a href="#">42967</a>                                                          | <a href="#">42977</a> | <a href="#">42988</a> | <a href="#">42999</a> | <a href="#">43010</a> | <a href="#">43021</a> | <a href="#">43032</a> | <a href="#">43043</a> |
|                                                     | (42967) | CACATTTATGCATTACGCAACTGAGCTGTTCAATTAAGAGCGCAACACAAATAAGACTTGCGTTCTTGAATAGCGCAA |                       |                       |                       |                       |                       |                       |                       |
|                                                     | (1)     | -----                                                                          |                       |                       |                       |                       |                       |                       |                       |
|                                                     |         | Section 560                                                                    |                       |                       |                       |                       |                       |                       |                       |
| Autographa californica nucleopolyhedrovirus NC 0... | (43044) | <a href="#">43044</a>                                                          | <a href="#">43054</a> | <a href="#">43065</a> | <a href="#">43076</a> | <a href="#">43087</a> | <a href="#">43098</a> | <a href="#">43109</a> | <a href="#">43120</a> |
|                                                     | (43044) | AAAAGCATACGTTTCATTGCTGTTTGTAGCGCAATCAAAAGTATATTTTAATTTGATTTATTTTCAATTCTATCGTA  |                       |                       |                       |                       |                       |                       |                       |
|                                                     | (1)     | -----                                                                          |                       |                       |                       |                       |                       |                       |                       |



## SARS-CoV-2 &amp; Autographa californica nucleopolyhedrovirus.apr

|                                                                                |         |                                                                                |       |       |       |       |       |       |       |
|--------------------------------------------------------------------------------|---------|--------------------------------------------------------------------------------|-------|-------|-------|-------|-------|-------|-------|
| Section 561                                                                    |         |                                                                                |       |       |       |       |       |       |       |
| Autographa californica nucleopolyhedrovirus NC 045512.2 SARS-CoV-2 NC_045512.2 | (43121) | 43121                                                                          | 43131 | 43142 | 43153 | 43164 | 43175 | 43186 | 43197 |
|                                                                                | (43121) | CAACTCGTTGAAATCTTGAACCACGTCCGTCATCGTGAAGCGATTACTGCGCACTAATTATGTCTAAACGTGTTTCGT |       |       |       |       |       |       |       |
|                                                                                | (1)     | -----                                                                          |       |       |       |       |       |       |       |
| Section 562                                                                    |         |                                                                                |       |       |       |       |       |       |       |
| Autographa californica nucleopolyhedrovirus NC 045512.2 SARS-CoV-2 NC_045512.2 | (43198) | 43198                                                                          | 43208 | 43219 | 43230 | 43241 | 43252 | 43263 | 43274 |
|                                                                                | (43198) | GAACGGTCGGTTGTTTCGGATGAAACGGCCAAACGCATTTCGACAAAACGAACACTGTCATGCCAAAAATGAATCTTT |       |       |       |       |       |       |       |
|                                                                                | (1)     | -----                                                                          |       |       |       |       |       |       |       |
| Section 563                                                                    |         |                                                                                |       |       |       |       |       |       |       |
| Autographa californica nucleopolyhedrovirus NC 045512.2 SARS-CoV-2 NC_045512.2 | (43275) | 43275                                                                          | 43285 | 43296 | 43307 | 43318 | 43329 | 43340 | 43351 |
|                                                                                | (43275) | TTTGGGGTTTTGCAACTTGGAAGAAATTGATTATTATCAATGTTTAAAAATGCAATACGTTCCGGACCAAAGTTTG   |       |       |       |       |       |       |       |
|                                                                                | (1)     | -----                                                                          |       |       |       |       |       |       |       |
| Section 564                                                                    |         |                                                                                |       |       |       |       |       |       |       |
| Autographa californica nucleopolyhedrovirus NC 045512.2 SARS-CoV-2 NC_045512.2 | (43352) | 43352                                                                          | 43362 | 43373 | 43384 | 43395 | 43406 | 43417 | 43428 |
|                                                                                | (43352) | ACAACGATTTTATTTTAAACAGTGACAGAAATGGCCAACGTGGTGACGAAACAAGTTAGACCGTATAACAGTATCGAC |       |       |       |       |       |       |       |
|                                                                                | (1)     | -----                                                                          |       |       |       |       |       |       |       |
| Section 565                                                                    |         |                                                                                |       |       |       |       |       |       |       |
| Autographa californica nucleopolyhedrovirus NC 045512.2 SARS-CoV-2 NC_045512.2 | (43429) | 43429                                                                          | 43439 | 43450 | 43461 | 43472 | 43483 | 43494 | 43505 |
|                                                                                | (43429) | GAAAAGCACCATTACAACACGGTGCGTAACGTGTTGATTTTAATAAAAAATGCGCGTTTAGTGCTTAGTAATAGTGT  |       |       |       |       |       |       |       |
|                                                                                | (1)     | -----                                                                          |       |       |       |       |       |       |       |
| Section 566                                                                    |         |                                                                                |       |       |       |       |       |       |       |
| Autographa californica nucleopolyhedrovirus NC 045512.2 SARS-CoV-2 NC_045512.2 | (43506) | 43506                                                                          | 43516 | 43527 | 43538 | 43549 | 43560 | 43571 | 43582 |
|                                                                                | (43506) | CAAAAAGCAATACTATGACGATGTGTTAAATGAAAAAAATACAGACTTGGAATCGTACGATCCATTGATTACGG     |       |       |       |       |       |       |       |
|                                                                                | (1)     | -----                                                                          |       |       |       |       |       |       |       |
| Section 567                                                                    |         |                                                                                |       |       |       |       |       |       |       |
| Autographa californica nucleopolyhedrovirus NC 045512.2 SARS-CoV-2 NC_045512.2 | (43583) | 43583                                                                          | 43593 | 43604 | 43615 | 43626 | 43637 | 43648 | 43659 |
|                                                                                | (43583) | TCTTTTTACAAATTGGCGAATCTGTAAATGAAGAAATACAAAACTCAGAAAAGCTTTGGTCAATATTTTTACTAAT   |       |       |       |       |       |       |       |
|                                                                                | (1)     | -----                                                                          |       |       |       |       |       |       |       |

## SARS-CoV-2 &amp; Autographa californica nucleopolyhedrovirus.apr

|                                                         |         |                                                                                 |       |       |       |       |       |       |       |
|---------------------------------------------------------|---------|---------------------------------------------------------------------------------|-------|-------|-------|-------|-------|-------|-------|
| Section 568                                             |         |                                                                                 |       |       |       |       |       |       |       |
| Autographa californica nucleopolyhedrovirus NC 045512.2 | (43660) | 43660                                                                           | 43670 | 43681 | 43692 | 43703 | 43714 | 43725 | 43736 |
|                                                         | (43660) | AAACCCGACAAGTCGGATATAAACAAACCCAGATGTAGTTTCGTATCAATTTATTTTTGGCAGAGTACAAAAATTGTA  |       |       |       |       |       |       |       |
|                                                         | (1)     | -----                                                                           |       |       |       |       |       |       |       |
| Section 569                                             |         |                                                                                 |       |       |       |       |       |       |       |
| Autographa californica nucleopolyhedrovirus NC 045512.2 | (43737) | 43737                                                                           | 43747 | 43758 | 43769 | 43780 | 43791 | 43802 | 43813 |
|                                                         | (43737) | TAACAGGGCAATTAAACAAAAAACTAAAACTATAATTGTAAAACGTCCTACAACATGAACAGAATTCAAATAGATT    |       |       |       |       |       |       |       |
|                                                         | (1)     | -----                                                                           |       |       |       |       |       |       |       |
| Section 570                                             |         |                                                                                 |       |       |       |       |       |       |       |
| Autographa californica nucleopolyhedrovirus NC 045512.2 | (43814) | 43814                                                                           | 43824 | 43835 | 43846 | 43857 | 43868 | 43879 | 43890 |
|                                                         | (43814) | GGAAAACCTCTTCCGAAGACGAACAAAAAATGACTAGACAAGAAATTGCCGAAAAAATTGTAAAGCCTTGTTTTGAG   |       |       |       |       |       |       |       |
|                                                         | (1)     | -----                                                                           |       |       |       |       |       |       |       |
| Section 571                                             |         |                                                                                 |       |       |       |       |       |       |       |
| Autographa californica nucleopolyhedrovirus NC 045512.2 | (43891) | 43891                                                                           | 43901 | 43912 | 43923 | 43934 | 43945 | 43956 | 43967 |
|                                                         | (43891) | CAATTTGGCACTATATTACACATATACGTATGTCCTTTAAACACAACCGAATTATTGTCGAGTATGCAAACCTCAGA   |       |       |       |       |       |       |       |
|                                                         | (1)     | -----                                                                           |       |       |       |       |       |       |       |
| Section 572                                             |         |                                                                                 |       |       |       |       |       |       |       |
| Autographa californica nucleopolyhedrovirus NC 045512.2 | (43968) | 43968                                                                           | 43978 | 43989 | 44000 | 44011 | 44022 | 44033 | 44044 |
|                                                         | (43968) | GTCGGTACAAAAAGCCATGACTGTAAATGACGACACTCGATTTACAGTTACAGAGTTTTCCGTGGTTCAGTACTACA   |       |       |       |       |       |       |       |
|                                                         | (1)     | -----                                                                           |       |       |       |       |       |       |       |
| Section 573                                             |         |                                                                                 |       |       |       |       |       |       |       |
| Autographa californica nucleopolyhedrovirus NC 045512.2 | (44045) | 44045                                                                           | 44055 | 44066 | 44077 | 44088 | 44099 | 44110 | 44121 |
|                                                         | (44045) | ACGTGGCCAAAACAGAAATGGTGAACCAGCGAATTGACATAATAAGCAAGGACATTGAGGATTTAAGAAACGCTTTA   |       |       |       |       |       |       |       |
|                                                         | (1)     | -----                                                                           |       |       |       |       |       |       |       |
| Section 574                                             |         |                                                                                 |       |       |       |       |       |       |       |
| Autographa californica nucleopolyhedrovirus NC 045512.2 | (44122) | 44122                                                                           | 44132 | 44143 | 44154 | 44165 | 44176 | 44187 | 44198 |
|                                                         | (44122) | AAATCTTACACATAAATTAAAAATATCGAACAAAGGAAAAAAACAATTGTAACAAAAATAATTTACATTAATAATTTAC |       |       |       |       |       |       |       |
|                                                         | (1)     | -----                                                                           |       |       |       |       |       |       |       |

## SARS-CoV-2 &amp; Autographa californica nucleopolyhedrovirus.apr

|                                                     |         |                                                                                |       |       |       |       |       |       |       |
|-----------------------------------------------------|---------|--------------------------------------------------------------------------------|-------|-------|-------|-------|-------|-------|-------|
|                                                     |         | Section 575                                                                    |       |       |       |       |       |       |       |
| Autographa californica nucleopolyhedrovirus NC 0... | (44199) | 44199                                                                          | 44209 | 44220 | 44231 | 44242 | 44253 | 44264 | 44275 |
|                                                     | (44199) | AAGTTTTTTTCTAGTGTGCTACTTTTTTACAATGCGTCTGTTGTCCGTCGAGCATTGCAAACATATTGTGGACGGCG  |       |       |       |       |       |       |       |
| SARS-CoV-2 NC_045512.2                              | (1)     | -----                                                                          |       |       |       |       |       |       |       |
|                                                     |         | Section 576                                                                    |       |       |       |       |       |       |       |
| Autographa californica nucleopolyhedrovirus NC 0... | (44276) | 44276                                                                          | 44286 | 44297 | 44308 | 44319 | 44330 | 44341 | 44352 |
|                                                     | (44276) | CAAAATAGCAAACAAAAGGCACGTCCGCGCTCTCCCACGCTATTCTAAAACGATGAATCCATATTAATTTTTTCATTG |       |       |       |       |       |       |       |
| SARS-CoV-2 NC_045512.2                              | (1)     | -----                                                                          |       |       |       |       |       |       |       |
|                                                     |         | Section 577                                                                    |       |       |       |       |       |       |       |
| Autographa californica nucleopolyhedrovirus NC 0... | (44353) | 44353                                                                          | 44363 | 44374 | 44385 | 44396 | 44407 | 44418 | 44429 |
|                                                     | (44353) | TCGCCAAACGTCGCTCCGCTGCCTCCTTCCAATAACAAATACTCAGAAACACAAACATGTACAATTGCTGTCGCGGC  |       |       |       |       |       |       |       |
| SARS-CoV-2 NC_045512.2                              | (1)     | -----                                                                          |       |       |       |       |       |       |       |
|                                                     |         | Section 578                                                                    |       |       |       |       |       |       |       |
| Autographa californica nucleopolyhedrovirus NC 0... | (44430) | 44430                                                                          | 44440 | 44451 | 44462 | 44473 | 44484 | 44495 | 44506 |
|                                                     | (44430) | GTTAATTGTCGCTGTTTTTCCAAATAGTCTATTATGGGAAACAAACACTTGTCAACACAAATACTCGTTAATTGT    |       |       |       |       |       |       |       |
| SARS-CoV-2 NC_045512.2                              | (1)     | -----                                                                          |       |       |       |       |       |       |       |
|                                                     |         | Section 579                                                                    |       |       |       |       |       |       |       |
| Autographa californica nucleopolyhedrovirus NC 0... | (44507) | 44507                                                                          | 44517 | 44528 | 44539 | 44550 | 44561 | 44572 | 44583 |
|                                                     | (44507) | CACAACCGACAAGCACATTTGGCAAAATGCGTCGCAATTTTGTACGGACGAGATTCTATGCGAAGTTCGTTGTCCA   |       |       |       |       |       |       |       |
| SARS-CoV-2 NC_045512.2                              | (1)     | -----                                                                          |       |       |       |       |       |       |       |
|                                                     |         | Section 580                                                                    |       |       |       |       |       |       |       |
| Autographa californica nucleopolyhedrovirus NC 0... | (44584) | 44584                                                                          | 44594 | 44605 | 44616 | 44627 | 44638 | 44649 | 44660 |
|                                                     | (44584) | TGACGTCTTGGGTCCACTTTTTCAACAAGACACTTTTATATTTGTGATTTGTACAACCTTTGGTACGTGTTAGAGTGT |       |       |       |       |       |       |       |
| SARS-CoV-2 NC_045512.2                              | (1)     | -----                                                                          |       |       |       |       |       |       |       |
|                                                     |         | Section 581                                                                    |       |       |       |       |       |       |       |
| Autographa californica nucleopolyhedrovirus NC 0... | (44661) | 44661                                                                          | 44671 | 44682 | 44693 | 44704 | 44715 | 44726 | 44737 |
|                                                     | (44661) | TTTTGATAAGCTTTGATAAGTTTAAACTGTTGGAGTAAGGCCACGTCATTATGTTCTGCACCTTTTGTTTAAAGA    |       |       |       |       |       |       |       |
| SARS-CoV-2 NC_045512.2                              | (1)     | -----                                                                          |       |       |       |       |       |       |       |

## SARS-CoV-2 &amp; Autographa californica nucleopolyhedrovirus.apr

|                                                     |         |                                                                                 |       |       |       |       |       |       |       |
|-----------------------------------------------------|---------|---------------------------------------------------------------------------------|-------|-------|-------|-------|-------|-------|-------|
|                                                     |         | Section 582                                                                     |       |       |       |       |       |       |       |
| Autographa californica nucleopolyhedrovirus NC 0... | (44738) | 44738                                                                           | 44748 | 44759 | 44770 | 44781 | 44792 | 44803 | 44814 |
|                                                     | (44738) | CAGAAATTACTATATGTTCAAAC TATT TAAAGATTATTGGCCAACGTGCACGACAGAATGCCAGATATGTCTTGAGA |       |       |       |       |       |       |       |
|                                                     | (1)     | -----                                                                           |       |       |       |       |       |       |       |
|                                                     |         | Section 583                                                                     |       |       |       |       |       |       |       |
| Autographa californica nucleopolyhedrovirus NC 0... | (44815) | 44815                                                                           | 44825 | 44836 | 44847 | 44858 | 44869 | 44880 | 44891 |
|                                                     | (44815) | AAATTGACGATAACGGGGGCATAGTGGCAATGCCGACACTGGCATGTTAAACTTGGAAAAGATGTTTCACGAACAA    |       |       |       |       |       |       |       |
|                                                     | (1)     | -----                                                                           |       |       |       |       |       |       |       |
|                                                     |         | Section 584                                                                     |       |       |       |       |       |       |       |
| Autographa californica nucleopolyhedrovirus NC 0... | (44892) | 44892                                                                           | 44902 | 44913 | 44924 | 44935 | 44946 | 44957 | 44968 |
|                                                     | (44892) | TGTATT CAGCGTTGGCGTCGCGAACATACTCGAGATCCCTTTAATCGTGTTATAAAATATTATTTTAACTTTCCCCC  |       |       |       |       |       |       |       |
|                                                     | (1)     | -----                                                                           |       |       |       |       |       |       |       |
|                                                     |         | Section 585                                                                     |       |       |       |       |       |       |       |
| Autographa californica nucleopolyhedrovirus NC 0... | (44969) | 44969                                                                           | 44979 | 44990 | 45001 | 45012 | 45023 | 45034 | 45045 |
|                                                     | (44969) | AAAAACACTAGAGGAGTGCAACGTGATGCTTCGAGAACTAAAGGGTCTATAGGCGATCACGAAATTGATCGCGTTT    |       |       |       |       |       |       |       |
|                                                     | (1)     | -----                                                                           |       |       |       |       |       |       |       |
|                                                     |         | Section 586                                                                     |       |       |       |       |       |       |       |
| Autographa californica nucleopolyhedrovirus NC 0... | (45046) | 45046                                                                           | 45056 | 45067 | 45078 | 45089 | 45100 | 45111 | 45122 |
|                                                     | (45046) | ACAAACGCGTTTATCAACGCGTTACACAGGAAGACGCCCTGGACATTGAACTCGATTTTAGGCATTTTTTTAAATG    |       |       |       |       |       |       |       |
|                                                     | (1)     | -----                                                                           |       |       |       |       |       |       |       |
|                                                     |         | Section 587                                                                     |       |       |       |       |       |       |       |
| Autographa californica nucleopolyhedrovirus NC 0... | (45123) | 45123                                                                           | 45133 | 45144 | 45155 | 45166 | 45177 | 45188 | 45199 |
|                                                     | (45123) | CAATCATGACGAACGTATGGTTCGCGACGGACGTCAACCTGATCAATTGTGTACTGAAAGATAATTTATTTTGTATA   |       |       |       |       |       |       |       |
|                                                     | (1)     | -----                                                                           |       |       |       |       |       |       |       |
|                                                     |         | Section 588                                                                     |       |       |       |       |       |       |       |
| Autographa californica nucleopolyhedrovirus NC 0... | (45200) | 45200                                                                           | 45210 | 45221 | 45232 | 45243 | 45254 | 45265 | 45276 |
|                                                     | (45200) | GATAATAATTACATTATTTTAAATGTGTTTCGACCAAGAAACCGATCAAGTTAGACCTCTGTGCCTCGGTGAAATTAA  |       |       |       |       |       |       |       |
|                                                     | (1)     | -----                                                                           |       |       |       |       |       |       |       |

## SARS-CoV-2 &amp; Autographa californica nucleopolyhedrovirus.apr

|                                                     |         |                                                                                |       |       |       |       |       |       |       |
|-----------------------------------------------------|---------|--------------------------------------------------------------------------------|-------|-------|-------|-------|-------|-------|-------|
|                                                     |         | Section 589                                                                    |       |       |       |       |       |       |       |
| Autographa californica nucleopolyhedrovirus NC 0... | (45277) | 45277                                                                          | 45287 | 45298 | 45309 | 45320 | 45331 | 45342 | 45353 |
|                                                     | (45277) | CGCCCTTCAAACCGATGCGGCCGCCAAGCCGATGCAATGCTGGATACATCCTCGACGAGCGAATTGCAAAGTAACG   |       |       |       |       |       |       |       |
|                                                     | (1)     | -----                                                                          |       |       |       |       |       |       |       |
|                                                     |         | Section 590                                                                    |       |       |       |       |       |       |       |
| Autographa californica nucleopolyhedrovirus NC 0... | (45354) | 45354                                                                          | 45364 | 45375 | 45386 | 45397 | 45408 | 45419 | 45430 |
|                                                     | (45354) | CGTCCACGTAACAATTATTCAGATCCCGATAACGAAAACGACATGTTGCACATGACCGTGTTAAACAGCGTGTTTTT  |       |       |       |       |       |       |       |
|                                                     | (1)     | -----                                                                          |       |       |       |       |       |       |       |
|                                                     |         | Section 591                                                                    |       |       |       |       |       |       |       |
| Autographa californica nucleopolyhedrovirus NC 0... | (45431) | 45431                                                                          | 45441 | 45452 | 45463 | 45474 | 45485 | 45496 | 45507 |
|                                                     | (45431) | GAACGAGCACGCGAAATTGTATTATCGGCACCTTGTTGCGCAACGATCAAGCCGAGGCGAGAAAAACAATTCTCAACG |       |       |       |       |       |       |       |
|                                                     | (1)     | -----                                                                          |       |       |       |       |       |       |       |
|                                                     |         | Section 592                                                                    |       |       |       |       |       |       |       |
| Autographa californica nucleopolyhedrovirus NC 0... | (45508) | 45508                                                                          | 45518 | 45529 | 45540 | 45551 | 45562 | 45573 | 45584 |
|                                                     | (45508) | CCGACAGCGTGACGAGTGCATGTTAATTAGACCAATTCGTACGGAACATTTTAGAAGCGTCGACGAGGCTGGCGAA   |       |       |       |       |       |       |       |
|                                                     | (1)     | -----                                                                          |       |       |       |       |       |       |       |
|                                                     |         | Section 593                                                                    |       |       |       |       |       |       |       |
| Autographa californica nucleopolyhedrovirus NC 0... | (45585) | 45585                                                                          | 45595 | 45606 | 45617 | 45628 | 45639 | 45650 | 45661 |
|                                                     | (45585) | CACAACATGAGCGTTTTAAAGATCATCATCGATGCGGTCATCAAGTACATTGGCAAACCTGGCCGACGACGAGTACAT |       |       |       |       |       |       |       |
|                                                     | (1)     | -----                                                                          |       |       |       |       |       |       |       |
|                                                     |         | Section 594                                                                    |       |       |       |       |       |       |       |
| Autographa californica nucleopolyhedrovirus NC 0... | (45662) | 45662                                                                          | 45672 | 45683 | 45694 | 45705 | 45716 | 45727 | 45738 |
|                                                     | (45662) | TTTGATAGCGGACCGCATGTATGTCGATTTAATCTATTCCGAATTTAGGGCCATTATTTTGCCTCAAAGCGCGTACA  |       |       |       |       |       |       |       |
|                                                     | (1)     | -----                                                                          |       |       |       |       |       |       |       |
|                                                     |         | Section 595                                                                    |       |       |       |       |       |       |       |
| Autographa californica nucleopolyhedrovirus NC 0... | (45739) | 45739                                                                          | 45749 | 45760 | 45771 | 45782 | 45793 | 45804 | 45815 |
|                                                     | (45739) | TTATCAAAGGAGATTACGCAGAAAGCGATAGTGAAAGCGGGCAAAGTGTCGACGTTTGTAATGAACTCGAATATCCT  |       |       |       |       |       |       |       |
|                                                     | (1)     | -----                                                                          |       |       |       |       |       |       |       |

## SARS-CoV-2 &amp; Autographa californica nucleopolyhedrovirus.apr

|                                                     |         |                                                                                |       |       |       |       |       |       |       |
|-----------------------------------------------------|---------|--------------------------------------------------------------------------------|-------|-------|-------|-------|-------|-------|-------|
|                                                     |         | Section 596                                                                    |       |       |       |       |       |       |       |
| Autographa californica nucleopolyhedrovirus NC 0... | (45816) | 45816                                                                          | 45826 | 45837 | 45848 | 45859 | 45870 | 45881 | 45892 |
|                                                     | (45816) | TGGAAATTAATTACGGCGAACAATTGTATTGTTTCTACGGACGAGTCACGTCAGTCGCAATACATTTATCGCACTTT  |       |       |       |       |       |       |       |
|                                                     | (1)     | -----                                                                          |       |       |       |       |       |       |       |
|                                                     |         | Section 597                                                                    |       |       |       |       |       |       |       |
| Autographa californica nucleopolyhedrovirus NC 0... | (45893) | 45893                                                                          | 45903 | 45914 | 45925 | 45936 | 45947 | 45958 | 45969 |
|                                                     | (45893) | TCTTTTGTACAATACAGTCTTGACCGCAATTCTTAAACAAAACAATCCATTTCGACGTAATTGCCGAAAATACTTCTA |       |       |       |       |       |       |       |
|                                                     | (1)     | -----                                                                          |       |       |       |       |       |       |       |
|                                                     |         | Section 598                                                                    |       |       |       |       |       |       |       |
| Autographa californica nucleopolyhedrovirus NC 0... | (45970) | 45970                                                                          | 45980 | 45991 | 46002 | 46013 | 46024 | 46035 | 46046 |
|                                                     | (45970) | TTTCAATTATAGTCAGGAATTTGGGCAGCTGTCCAAACAATAAAGATCGGGTAAAGTGCTGCGATCTTAATTACGGC  |       |       |       |       |       |       |       |
|                                                     | (1)     | -----                                                                          |       |       |       |       |       |       |       |
|                                                     |         | Section 599                                                                    |       |       |       |       |       |       |       |
| Autographa californica nucleopolyhedrovirus NC 0... | (46047) | 46047                                                                          | 46057 | 46068 | 46079 | 46090 | 46101 | 46112 | 46123 |
|                                                     | (46047) | GGCGTCCCGCCGGGACATGTCATGTGCCCGCCGCGTGAGATCACCAAAAAATTTTTTCATTACGCAAAGTGGGTTTCG |       |       |       |       |       |       |       |
|                                                     | (1)     | -----                                                                          |       |       |       |       |       |       |       |
|                                                     |         | Section 600                                                                    |       |       |       |       |       |       |       |
| Autographa californica nucleopolyhedrovirus NC 0... | (46124) | 46124                                                                          | 46134 | 46145 | 46156 | 46167 | 46178 | 46189 | 46200 |
|                                                     | (46124) | AAATCCCAACAAGTACAAACGATACAGCGAGTTAATCGCGCGCCAATCAGAAACCGGCGGCGGATCTGCGAGTTTAC  |       |       |       |       |       |       |       |
|                                                     | (1)     | -----                                                                          |       |       |       |       |       |       |       |
|                                                     |         | Section 601                                                                    |       |       |       |       |       |       |       |
| Autographa californica nucleopolyhedrovirus NC 0... | (46201) | 46201                                                                          | 46211 | 46222 | 46233 | 46244 | 46255 | 46266 | 46277 |
|                                                     | (46201) | GCGAAAACGTAAACAACCAGCTACACGCTCGAGATGTGTCTCAATTACATTTATTGGATTGGGAAAACCTTTATGGGT |       |       |       |       |       |       |       |
|                                                     | (1)     | -----                                                                          |       |       |       |       |       |       |       |
|                                                     |         | Section 602                                                                    |       |       |       |       |       |       |       |
| Autographa californica nucleopolyhedrovirus NC 0... | (46278) | 46278                                                                          | 46288 | 46299 | 46310 | 46321 | 46332 | 46343 | 46354 |
|                                                     | (46278) | GAATTCAGCAGTTATTTTGGTCTGCACGCACACAACGTGTAGCATCGCCAGTATTTAACAGCTGACCTATTTGTTAA  |       |       |       |       |       |       |       |
|                                                     | (1)     | -----                                                                          |       |       |       |       |       |       |       |

## SARS-CoV-2 &amp; Autographa californica nucleopolyhedrovirus.apr

|                                                     |         |                                                                                  |       |       |       |       |       |       |       |
|-----------------------------------------------------|---------|----------------------------------------------------------------------------------|-------|-------|-------|-------|-------|-------|-------|
|                                                     |         | Section 603                                                                      |       |       |       |       |       |       |       |
| Autographa californica nucleopolyhedrovirus NC 0... | (46355) | 46355                                                                            | 46365 | 46376 | 46387 | 46398 | 46409 | 46420 | 46431 |
|                                                     | (46355) | ACAAGCATTCTTATCTCAATAATTGGTCCGACGTGGTGACAATTGTATCCACAATCATGAAAAAAGTAGCGCTTGGA    |       |       |       |       |       |       |       |
| SARS-CoV-2 NC_045512.2                              | (1)     | -----                                                                            |       |       |       |       |       |       |       |
|                                                     |         | Section 604                                                                      |       |       |       |       |       |       |       |
| Autographa californica nucleopolyhedrovirus NC 0... | (46432) | 46432                                                                            | 46442 | 46453 | 46464 | 46475 | 46486 | 46497 | 46508 |
|                                                     | (46432) | AAAATTATCGAAAACACAGTAGAAAGCAAATATAAAAGCAACAGTGTGTCGTCGTCATTGTCAACGGGCGCCAGTGC    |       |       |       |       |       |       |       |
| SARS-CoV-2 NC_045512.2                              | (1)     | -----                                                                            |       |       |       |       |       |       |       |
|                                                     |         | Section 605                                                                      |       |       |       |       |       |       |       |
| Autographa californica nucleopolyhedrovirus NC 0... | (46509) | 46509                                                                            | 46519 | 46530 | 46541 | 46552 | 46563 | 46574 | 46585 |
|                                                     | (46509) | AAAATTGAGTTTAAAGCGAATATTACAAAACCTTTTGAAGCAAATAAAGTGGGCCAGCACACTACGTACGACGTGGTTCG |       |       |       |       |       |       |       |
| SARS-CoV-2 NC_045512.2                              | (1)     | -----                                                                            |       |       |       |       |       |       |       |
|                                                     |         | Section 606                                                                      |       |       |       |       |       |       |       |
| Autographa californica nucleopolyhedrovirus NC 0... | (46586) | 46586                                                                            | 46596 | 46607 | 46618 | 46629 | 46640 | 46651 | 46662 |
|                                                     | (46586) | GCAAGCGAGATTACACGAAATTTGACAAATTGGTGAAAAAATATTGACATGCTGCGATCAATCATGCGACGTTTCAA    |       |       |       |       |       |       |       |
| SARS-CoV-2 NC_045512.2                              | (1)     | -----                                                                            |       |       |       |       |       |       |       |
|                                                     |         | Section 607                                                                      |       |       |       |       |       |       |       |
| Autographa californica nucleopolyhedrovirus NC 0... | (46663) | 46663                                                                            | 46673 | 46684 | 46695 | 46706 | 46717 | 46728 | 46739 |
|                                                     | (46663) | GAGTACAAACAATCTCAGCAAAAAACCTCCGATTATTATGTAGTGTTATGTCCAAAGTGTTATTTTGTGACGTCGG     |       |       |       |       |       |       |       |
| SARS-CoV-2 NC_045512.2                              | (1)     | -----                                                                            |       |       |       |       |       |       |       |
|                                                     |         | Section 608                                                                      |       |       |       |       |       |       |       |
| Autographa californica nucleopolyhedrovirus NC 0... | (46740) | 46740                                                                            | 46750 | 46761 | 46772 | 46783 | 46794 | 46805 | 46816 |
|                                                     | (46740) | CCGAAGTGAGCGTGGCTGAATACATAGAAATGCATAAAAAATTTTAACACGAAATTCGCCGATCGGTGCCCTAACGAT   |       |       |       |       |       |       |       |
| SARS-CoV-2 NC_045512.2                              | (1)     | -----                                                                            |       |       |       |       |       |       |       |
|                                                     |         | Section 609                                                                      |       |       |       |       |       |       |       |
| Autographa californica nucleopolyhedrovirus NC 0... | (46817) | 46817                                                                            | 46827 | 46838 | 46849 | 46860 | 46871 | 46882 | 46893 |
|                                                     | (46817) | TTTATTGTGACCAACTCTAAAAGTTGGAATAATCATGAAAATTGTTCTGCCCTATTTTACCCTCTGTGTTAATAAAG    |       |       |       |       |       |       |       |
| SARS-CoV-2 NC_045512.2                              | (1)     | -----                                                                            |       |       |       |       |       |       |       |

## SARS-CoV-2 &amp; Autographa californica nucleopolyhedrovirus.apr

|                                                                                |         |                                                                                |       |       |       |       |       |       |       |
|--------------------------------------------------------------------------------|---------|--------------------------------------------------------------------------------|-------|-------|-------|-------|-------|-------|-------|
| Section 610                                                                    |         |                                                                                |       |       |       |       |       |       |       |
| Autographa californica nucleopolyhedrovirus NC 045512.2 SARS-CoV-2 NC_045512.2 | (46894) | 46894                                                                          | 46904 | 46915 | 46926 | 46937 | 46948 | 46959 | 46970 |
|                                                                                | (46894) | TTTGTGTGTTTGTATTTTGTGGTTTATTTATTTACGCTAGATATTGGGTTTAAGGTTCTTAGAAATAGAGTTGTATT  |       |       |       |       |       |       |       |
|                                                                                | (1)     | -----                                                                          |       |       |       |       |       |       |       |
| Section 611                                                                    |         |                                                                                |       |       |       |       |       |       |       |
| Autographa californica nucleopolyhedrovirus NC 045512.2 SARS-CoV-2 NC_045512.2 | (46971) | 46971                                                                          | 46981 | 46992 | 47003 | 47014 | 47025 | 47036 | 47047 |
|                                                                                | (46971) | TTCCCTACCAAAGGGATTTGAGCTTCATATAAATACAATATTCGCTCGACAAGCGGTTTATTTCACTCGGAGGTAT   |       |       |       |       |       |       |       |
|                                                                                | (1)     | -----                                                                          |       |       |       |       |       |       |       |
| Section 612                                                                    |         |                                                                                |       |       |       |       |       |       |       |
| Autographa californica nucleopolyhedrovirus NC 045512.2 SARS-CoV-2 NC_045512.2 | (47048) | 47048                                                                          | 47058 | 47069 | 47080 | 47091 | 47102 | 47113 | 47124 |
|                                                                                | (47048) | TATATCAGGCAGTCGAACGTGCGCGATGAAACATCCCGTTTACGCTAGATATTTGGAGTTTGATGATGTAGTGTTAG  |       |       |       |       |       |       |       |
|                                                                                | (1)     | -----                                                                          |       |       |       |       |       |       |       |
| Section 613                                                                    |         |                                                                                |       |       |       |       |       |       |       |
| Autographa californica nucleopolyhedrovirus NC 045512.2 SARS-CoV-2 NC_045512.2 | (47125) | 47125                                                                          | 47135 | 47146 | 47157 | 47168 | 47179 | 47190 | 47201 |
|                                                                                | (47125) | ATTTGACTAGTTTAATATTTTGTAGAGTTTGATAACGCTCAAAATGAAGAGTACATTATTTTATGAATGTAAAAAG   |       |       |       |       |       |       |       |
|                                                                                | (1)     | -----                                                                          |       |       |       |       |       |       |       |
| Section 614                                                                    |         |                                                                                |       |       |       |       |       |       |       |
| Autographa californica nucleopolyhedrovirus NC 045512.2 SARS-CoV-2 NC_045512.2 | (47202) | 47202                                                                          | 47212 | 47223 | 47234 | 47245 | 47256 | 47267 | 47278 |
|                                                                                | (47202) | GCGTTTTACAAAACTTTCACATTACTTGTGATCTGTCGCTTGAAACGCTGACCGTGTTGGTGTACGAAAAAGCTCG   |       |       |       |       |       |       |       |
|                                                                                | (1)     | -----                                                                          |       |       |       |       |       |       |       |
| Section 615                                                                    |         |                                                                                |       |       |       |       |       |       |       |
| Autographa californica nucleopolyhedrovirus NC 045512.2 SARS-CoV-2 NC_045512.2 | (47279) | 47279                                                                          | 47289 | 47300 | 47311 | 47322 | 47333 | 47344 | 47355 |
|                                                                                | (47279) | CCTAATTGTGAAACAAATGGAGTTTGAGCAGCCGCCAAACTTTGTTAATTTTATCAGTTTCAACGCGACCGACAACG  |       |       |       |       |       |       |       |
|                                                                                | (1)     | -----                                                                          |       |       |       |       |       |       |       |
| Section 616                                                                    |         |                                                                                |       |       |       |       |       |       |       |
| Autographa californica nucleopolyhedrovirus NC 045512.2 SARS-CoV-2 NC_045512.2 | (47356) | 47356                                                                          | 47366 | 47377 | 47388 | 47399 | 47410 | 47421 | 47432 |
|                                                                                | (47356) | ACAACCTCCATGATAATAGACTTGTGTTCCGACGCGCGCATAATCGTGGCCAAGAAGCTGACGCCCGACGAAACGTAT |       |       |       |       |       |       |       |
|                                                                                | (1)     | -----                                                                          |       |       |       |       |       |       |       |



## SARS-CoV-2 &amp; Autographa californica nucleopolyhedrovirus.apr

|                                                     |         |                                                                                |       |       |       |       |       |       |       |
|-----------------------------------------------------|---------|--------------------------------------------------------------------------------|-------|-------|-------|-------|-------|-------|-------|
|                                                     |         | Section 617                                                                    |       |       |       |       |       |       |       |
| Autographa californica nucleopolyhedrovirus NC 0... | (47433) | 47433                                                                          | 47443 | 47454 | 47465 | 47476 | 47487 | 47498 | 47509 |
|                                                     | (47433) | CATCAGCGCGTGTCCGGATTTTGGATTTTCAAAAACGTAACCTGCATACCTCGGCCCCCAATCGAGTCGGACCCAAA  |       |       |       |       |       |       |       |
|                                                     | (1)     | -----                                                                          |       |       |       |       |       |       |       |
|                                                     |         | Section 618                                                                    |       |       |       |       |       |       |       |
| Autographa californica nucleopolyhedrovirus NC 0... | (47510) | 47510                                                                          | 47520 | 47531 | 47542 | 47553 | 47564 | 47575 | 47586 |
|                                                     | (47510) | AGTGCGAGACGCCTTGGATCGTGAAC TAGAAATAAACTATACAAGTAGAAAAAATTAATTTATTAATAGTTGTAA   |       |       |       |       |       |       |       |
|                                                     | (1)     | -----                                                                          |       |       |       |       |       |       |       |
|                                                     |         | Section 619                                                                    |       |       |       |       |       |       |       |
| Autographa californica nucleopolyhedrovirus NC 0... | (47587) | 47587                                                                          | 47597 | 47608 | 47619 | 47630 | 47641 | 47652 | 47663 |
|                                                     | (47587) | TAATTATCTTCGTCCTCATCTTCGCTGGTGT CATAATGCGGTGGTGTGTTTGTGTTTTGTTTTAATCGTTTGCGCGT |       |       |       |       |       |       |       |
|                                                     | (1)     | -----                                                                          |       |       |       |       |       |       |       |
|                                                     |         | Section 620                                                                    |       |       |       |       |       |       |       |
| Autographa californica nucleopolyhedrovirus NC 0... | (47664) | 47664                                                                          | 47674 | 47685 | 47696 | 47707 | 47718 | 47729 | 47740 |
|                                                     | (47664) | CGACACCACTTCGCCGATAGGAAATTTTTGGATTTGCAATTAAATGCCCTCTTAGCGACGCGCCGTTTACGACTAC   |       |       |       |       |       |       |       |
|                                                     | (1)     | -----                                                                          |       |       |       |       |       |       |       |
|                                                     |         | Section 621                                                                    |       |       |       |       |       |       |       |
| Autographa californica nucleopolyhedrovirus NC 0... | (47741) | 47741                                                                          | 47751 | 47762 | 47773 | 47784 | 47795 | 47806 | 47817 |
|                                                     | (47741) | TAAACATGTTGACGCGCTCGTCGTCTTCAGTGT CATAATCCGTGCTAGTGTTCGTTGTTATTTTCTATGAGACGA   |       |       |       |       |       |       |       |
|                                                     | (1)     | -----                                                                          |       |       |       |       |       |       |       |
|                                                     |         | Section 622                                                                    |       |       |       |       |       |       |       |
| Autographa californica nucleopolyhedrovirus NC 0... | (47818) | 47818                                                                          | 47828 | 47839 | 47850 | 47861 | 47872 | 47883 | 47894 |
|                                                     | (47818) | TCGTTTGATTTAGTTTTTCGTAGAATTGTCCGCGTTATCGTCGCTTCGTCGATGTCGTCCCTAACTATCTCGTAGGC  |       |       |       |       |       |       |       |
|                                                     | (1)     | -----                                                                          |       |       |       |       |       |       |       |
|                                                     |         | Section 623                                                                    |       |       |       |       |       |       |       |
| Autographa californica nucleopolyhedrovirus NC 0... | (47895) | 47895                                                                          | 47905 | 47916 | 47927 | 47938 | 47949 | 47960 | 47971 |
|                                                     | (47895) | GGCTTTGCGCGGAATCCAAGATTTTGCAATGTATCTATTTTAACGTACTTTTCTTCGAGCGCTTTTCTAGCTTTATG  |       |       |       |       |       |       |       |
|                                                     | (1)     | -----                                                                          |       |       |       |       |       |       |       |

## SARS-CoV-2 &amp; Autographa californica nucleopolyhedrovirus.apr

|                                                     |         |                                                                                |       |       |       |       |       |       |       |
|-----------------------------------------------------|---------|--------------------------------------------------------------------------------|-------|-------|-------|-------|-------|-------|-------|
|                                                     |         | Section 624                                                                    |       |       |       |       |       |       |       |
| Autographa californica nucleopolyhedrovirus NC 0... | (47972) | 47972                                                                          | 47982 | 47993 | 48004 | 48015 | 48026 | 48037 | 48048 |
|                                                     | (47972) | CATAGCAATGCTCTTCGTCGCCGCCGTTCAATTTATGATACTTTGTAAACGTCTCGACGAATAACTTTTTGGCGCGAG |       |       |       |       |       |       |       |
|                                                     | (1)     | -----                                                                          |       |       |       |       |       |       |       |
|                                                     |         | Section 625                                                                    |       |       |       |       |       |       |       |
| Autographa californica nucleopolyhedrovirus NC 0... | (48049) | 48049                                                                          | 48059 | 48070 | 48081 | 48092 | 48103 | 48114 | 48125 |
|                                                     | (48049) | GAGGCATTTTTTCATTGTATAACATATCGGGAATTTGATACATTGTAATTAGAATTAAGCAAGTTCGTCTTCGGTTG  |       |       |       |       |       |       |       |
|                                                     | (1)     | -----                                                                          |       |       |       |       |       |       |       |
|                                                     |         | Section 626                                                                    |       |       |       |       |       |       |       |
| Autographa californica nucleopolyhedrovirus NC 0... | (48126) | 48126                                                                          | 48136 | 48147 | 48158 | 48169 | 48180 | 48191 | 48202 |
|                                                     | (48126) | TACTGTATTTCGGTTTCTGTATCTGTAGTGGAATCCTCTGTACTAGTAGTAGTGTCGCTATTGTTGGCGTCAGGCCTT |       |       |       |       |       |       |       |
|                                                     | (1)     | -----                                                                          |       |       |       |       |       |       |       |
|                                                     |         | Section 627                                                                    |       |       |       |       |       |       |       |
| Autographa californica nucleopolyhedrovirus NC 0... | (48203) | 48203                                                                          | 48213 | 48224 | 48235 | 48246 | 48257 | 48268 | 48279 |
|                                                     | (48203) | GGCTGCCATTTACCGTCTATCAACATGTATTTTTTCCTAACAGCACAAACATGCTAGCTTGGTAGCTATCTGTGTCGA |       |       |       |       |       |       |       |
|                                                     | (1)     | -----                                                                          |       |       |       |       |       |       |       |
|                                                     |         | Section 628                                                                    |       |       |       |       |       |       |       |
| Autographa californica nucleopolyhedrovirus NC 0... | (48280) | 48280                                                                          | 48290 | 48301 | 48312 | 48323 | 48334 | 48345 | 48356 |
|                                                     | (48280) | CTTATATTTTTGTAAACTACGATCGTAGAATTTTTCAAATATCCTCTTACCGTTATAGGGAAGGTTTTGATAATATT  |       |       |       |       |       |       |       |
|                                                     | (1)     | -----                                                                          |       |       |       |       |       |       |       |
|                                                     |         | Section 629                                                                    |       |       |       |       |       |       |       |
| Autographa californica nucleopolyhedrovirus NC 0... | (48357) | 48357                                                                          | 48367 | 48378 | 48389 | 48400 | 48411 | 48422 | 48433 |
|                                                     | (48357) | TAGGCAACATATCAATAAAAGACAATATAAAAACTTTGTGTTGTGTTTTATTTATCACATAAAATGGACGTCTGGC   |       |       |       |       |       |       |       |
|                                                     | (1)     | -----                                                                          |       |       |       |       |       |       |       |
|                                                     |         | Section 630                                                                    |       |       |       |       |       |       |       |
| Autographa californica nucleopolyhedrovirus NC 0... | (48434) | 48434                                                                          | 48444 | 48455 | 48466 | 48477 | 48488 | 48499 | 48510 |
|                                                     | (48434) | AAGAATCACACCAATATTAGTGTTTTTTTTCTTACATTACGAGATTCAACTTGATACTAAAATTAATTATTAATTA   |       |       |       |       |       |       |       |
|                                                     | (1)     | -----                                                                          |       |       |       |       |       |       |       |

## SARS-CoV-2 &amp; Autographa californica nucleopolyhedrovirus.apr

|                                                     |         |                                                                                 |       |       |       |       |       |       |       |
|-----------------------------------------------------|---------|---------------------------------------------------------------------------------|-------|-------|-------|-------|-------|-------|-------|
|                                                     |         | Section 631                                                                     |       |       |       |       |       |       |       |
| Autographa californica nucleopolyhedrovirus NC 0... | (48511) | 48511                                                                           | 48521 | 48532 | 48543 | 48554 | 48565 | 48576 | 48587 |
|                                                     | (48511) | AATTAAATTAAATTTTGAAGCATTTTTTCGCTATCGTTTTCAGACTCAAAATTATCGACGCTATCGCTATGAAAAGC   |       |       |       |       |       |       |       |
|                                                     | (1)     | -----                                                                           |       |       |       |       |       |       |       |
|                                                     |         | Section 632                                                                     |       |       |       |       |       |       |       |
| Autographa californica nucleopolyhedrovirus NC 0... | (48588) | 48588                                                                           | 48598 | 48609 | 48620 | 48631 | 48642 | 48653 | 48664 |
|                                                     | (48588) | GTAATATTTGTTGGCTTTGAGATATTCTATATTTTGCTCATTTTTTAACAATAAACACGCGACTCTTTTCGTCGCGTC  |       |       |       |       |       |       |       |
|                                                     | (1)     | -----                                                                           |       |       |       |       |       |       |       |
|                                                     |         | Section 633                                                                     |       |       |       |       |       |       |       |
| Autographa californica nucleopolyhedrovirus NC 0... | (48665) | 48665                                                                           | 48675 | 48686 | 48697 | 48708 | 48719 | 48730 | 48741 |
|                                                     | (48665) | TCACCATAACACCGTTTTTACAAATGGAAATGTATTTGTAAACGGCAACAGAGCGTCGCGAGTTTTTTTAAGTAAC    |       |       |       |       |       |       |       |
|                                                     | (1)     | -----                                                                           |       |       |       |       |       |       |       |
|                                                     |         | Section 634                                                                     |       |       |       |       |       |       |       |
| Autographa californica nucleopolyhedrovirus NC 0... | (48742) | 48742                                                                           | 48752 | 48763 | 48774 | 48785 | 48796 | 48807 | 48818 |
|                                                     | (48742) | AGCTTTTGCTCCGCTGTGGCGGCCACAAATATTTTTACGGGCCCGTCGTAATTAATGTTTAAATTAATTAATTTTAAAG |       |       |       |       |       |       |       |
|                                                     | (1)     | -----                                                                           |       |       |       |       |       |       |       |
|                                                     |         | Section 635                                                                     |       |       |       |       |       |       |       |
| Autographa californica nucleopolyhedrovirus NC 0... | (48819) | 48819                                                                           | 48829 | 48840 | 48851 | 48862 | 48873 | 48884 | 48895 |
|                                                     | (48819) | TCGACGCTCGCGCGACTTGGTTTGCCATTCTTTAGCGCGCGTCGCGTCACACAGCTTGGCCACAATGTGGTTTTTGT   |       |       |       |       |       |       |       |
|                                                     | (1)     | -----                                                                           |       |       |       |       |       |       |       |
|                                                     |         | Section 636                                                                     |       |       |       |       |       |       |       |
| Autographa californica nucleopolyhedrovirus NC 0... | (48896) | 48896                                                                           | 48906 | 48917 | 48928 | 48939 | 48950 | 48961 | 48972 |
|                                                     | (48896) | CAAACGAAGATTCTATGACGTGTTTAAAGTTTAGGTCGAGTAAAGCGCAAATCTTTTTTAAATAATAGTTTCTAATT   |       |       |       |       |       |       |       |
|                                                     | (1)     | -----                                                                           |       |       |       |       |       |       |       |
|                                                     |         | Section 637                                                                     |       |       |       |       |       |       |       |
| Autographa californica nucleopolyhedrovirus NC 0... | (48973) | 48973                                                                           | 48983 | 48994 | 49005 | 49016 | 49027 | 49038 | 49049 |
|                                                     | (48973) | TTTTTATTATTACGCCTGCTGTCGTGAATACCGTATATCTCAACGCTGTCTGTGAGATTGTCGTATTCTAGCCTTTT   |       |       |       |       |       |       |       |
|                                                     | (1)     | -----                                                                           |       |       |       |       |       |       |       |

## SARS-CoV-2 &amp; Autographa californica nucleopolyhedrovirus.apr

|                                                     |                        |                                                                                   |       |       |       |       |       |       |       |
|-----------------------------------------------------|------------------------|-----------------------------------------------------------------------------------|-------|-------|-------|-------|-------|-------|-------|
| Section 638                                         |                        |                                                                                   |       |       |       |       |       |       |       |
| Autographa californica nucleopolyhedrovirus NC 0... | (49050)                | 49050                                                                             | 49060 | 49071 | 49082 | 49093 | 49104 | 49115 | 49126 |
|                                                     | (49050)                | TAGTTTTTCGCTCATCGACTTGATATTGTCCGACACATTTTCGTCGATTTGCGTTTTGATCAACGACTTGAGCAGAG     |       |       |       |       |       |       |       |
|                                                     | SARS-CoV-2 NC_045512.2 | (1)                                                                               | ----- |       |       |       |       |       |       |
| Section 639                                         |                        |                                                                                   |       |       |       |       |       |       |       |
| Autographa californica nucleopolyhedrovirus NC 0... | (49127)                | 49127                                                                             | 49137 | 49148 | 49159 | 49170 | 49181 | 49192 | 49203 |
|                                                     | (49127)                | ACACGTTAATCAACTGTTCAAATTGATCCATATTAACCTATATCAACCCGATGCGTATATGGTGCGTAAAATATATTT    |       |       |       |       |       |       |       |
|                                                     | SARS-CoV-2 NC_045512.2 | (1)                                                                               | ----- |       |       |       |       |       |       |
| Section 640                                         |                        |                                                                                   |       |       |       |       |       |       |       |
| Autographa californica nucleopolyhedrovirus NC 0... | (49204)                | 49204                                                                             | 49214 | 49225 | 49236 | 49247 | 49258 | 49269 | 49280 |
|                                                     | (49204)                | TTTAACCCTCTTATACTTTGCACTCTGCGTTAATACGCGTTCGTGTACAGACGTAATCATGTTTTCTTTTTTGGATA     |       |       |       |       |       |       |       |
|                                                     | SARS-CoV-2 NC_045512.2 | (1)                                                                               | ----- |       |       |       |       |       |       |
| Section 641                                         |                        |                                                                                   |       |       |       |       |       |       |       |
| Autographa californica nucleopolyhedrovirus NC 0... | (49281)                | 49281                                                                             | 49291 | 49302 | 49313 | 49324 | 49335 | 49346 | 49357 |
|                                                     | (49281)                | AAACTCCTACTGAGTTTGACCTCATATTAGACCCTCACAAAGTTGCAAAACGTGGCATTTTTTACCAATGAAGAATTT    |       |       |       |       |       |       |       |
|                                                     | SARS-CoV-2 NC_045512.2 | (1)                                                                               | ----- |       |       |       |       |       |       |
| Section 642                                         |                        |                                                                                   |       |       |       |       |       |       |       |
| Autographa californica nucleopolyhedrovirus NC 0... | (49358)                | 49358                                                                             | 49368 | 49379 | 49390 | 49401 | 49412 | 49423 | 49434 |
|                                                     | (49358)                | AAAGTTATTTTAAAAAATTTTCATCACAGATTTAAAGAAGAACCACAAAAATTAAATTATTTCAACAGTTTAAATCGACCA |       |       |       |       |       |       |       |
|                                                     | SARS-CoV-2 NC_045512.2 | (1)                                                                               | ----- |       |       |       |       |       |       |
| Section 643                                         |                        |                                                                                   |       |       |       |       |       |       |       |
| Autographa californica nucleopolyhedrovirus NC 0... | (49435)                | 49435                                                                             | 49445 | 49456 | 49467 | 49478 | 49489 | 49500 | 49511 |
|                                                     | (49435)                | ATTAATCAACGTGTACACAGACGCGTCGGTGAAAAACACGCAGCCCGACGTGTTGGCTAAAATTATCAAATCAACTT     |       |       |       |       |       |       |       |
|                                                     | SARS-CoV-2 NC_045512.2 | (1)                                                                               | ----- |       |       |       |       |       |       |
| Section 644                                         |                        |                                                                                   |       |       |       |       |       |       |       |
| Autographa californica nucleopolyhedrovirus NC 0... | (49512)                | 49512                                                                             | 49522 | 49533 | 49544 | 49555 | 49566 | 49577 | 49588 |
|                                                     | (49512)                | GTGTTATAGTCACAGATTTGCCGTCCAACGTGTTTCTCAAAAAGTTGAAGACCAACAAGTTTACAGACACTATTAAT     |       |       |       |       |       |       |       |
|                                                     | SARS-CoV-2 NC_045512.2 | (1)                                                                               | ----- |       |       |       |       |       |       |

## SARS-CoV-2 &amp; Autographa californica nucleopolyhedrovirus.apr

|                                                     |         |                                                                                  |       |       |       |       |       |       |       |
|-----------------------------------------------------|---------|----------------------------------------------------------------------------------|-------|-------|-------|-------|-------|-------|-------|
|                                                     |         | Section 645                                                                      |       |       |       |       |       |       |       |
| Autographa californica nucleopolyhedrovirus NC 0... | (49589) | 49589                                                                            | 49599 | 49610 | 49621 | 49632 | 49643 | 49654 | 49665 |
|                                                     | (49589) | TATTTAATTTTGCCCCACTTTATTTTGTGGGATCACAATTTTGTATATTTTAAACAAAGCTTCAATTCTAAACA       |       |       |       |       |       |       |       |
|                                                     | (1)     | -----                                                                            |       |       |       |       |       |       |       |
|                                                     |         | Section 646                                                                      |       |       |       |       |       |       |       |
| Autographa californica nucleopolyhedrovirus NC 0... | (49666) | 49666                                                                            | 49676 | 49687 | 49698 | 49709 | 49720 | 49731 | 49742 |
|                                                     | (49666) | TGAAAACGATCTGGTTGACATTTTCGGGCGCTCTGCAGAAAATCAAACCTTACACACGGTGTTCATCAAAGATCAGTTGC |       |       |       |       |       |       |       |
|                                                     | (1)     | -----                                                                            |       |       |       |       |       |       |       |
|                                                     |         | Section 647                                                                      |       |       |       |       |       |       |       |
| Autographa californica nucleopolyhedrovirus NC 0... | (49743) | 49743                                                                            | 49753 | 49764 | 49775 | 49786 | 49797 | 49808 | 49819 |
|                                                     | (49743) | AGAGCAAAAACGGGTACGCGGTCCAATACTTGTACGCGACGTTTCTCAACACGGCCTCGTTCTACGCCAACGTGCAA    |       |       |       |       |       |       |       |
|                                                     | (1)     | -----                                                                            |       |       |       |       |       |       |       |
|                                                     |         | Section 648                                                                      |       |       |       |       |       |       |       |
| Autographa californica nucleopolyhedrovirus NC 0... | (49820) | 49820                                                                            | 49830 | 49841 | 49852 | 49863 | 49874 | 49885 | 49896 |
|                                                     | (49820) | TGTTTAAATGGTGTCAACGAAATTATGCCGCCGCGGAGCAGCGTAAAGCGCTATTATGGACGTGATGTGGACAACGT    |       |       |       |       |       |       |       |
|                                                     | (1)     | -----                                                                            |       |       |       |       |       |       |       |
|                                                     |         | Section 649                                                                      |       |       |       |       |       |       |       |
| Autographa californica nucleopolyhedrovirus NC 0... | (49897) | 49897                                                                            | 49907 | 49918 | 49929 | 49940 | 49951 | 49962 | 49973 |
|                                                     | (49897) | GCGTGCATGGACCACGCGTCATCCCAACATTAGCCAGCTGAGTACGCAAGTCTCGGACGTCCACATTAACGAGTCAT    |       |       |       |       |       |       |       |
|                                                     | (1)     | -----                                                                            |       |       |       |       |       |       |       |
|                                                     |         | Section 650                                                                      |       |       |       |       |       |       |       |
| Autographa californica nucleopolyhedrovirus NC 0... | (49974) | 49974                                                                            | 49984 | 49995 | 50006 | 50017 | 50028 | 50039 | 50050 |
|                                                     | (49974) | CTACCGACTGGAATGTAAAAGTGGGTCTGGGAATATTTCCCGGCGCTAACACAGACTGCGACGGTGACAAAAAATT     |       |       |       |       |       |       |       |
|                                                     | (1)     | -----                                                                            |       |       |       |       |       |       |       |
|                                                     |         | Section 651                                                                      |       |       |       |       |       |       |       |
| Autographa californica nucleopolyhedrovirus NC 0... | (50051) | 50051                                                                            | 50061 | 50072 | 50083 | 50094 | 50105 | 50116 | 50127 |
|                                                     | (50051) | ATTACATTTTACCCAAACCTAATTCCTAATCGACTCGGAATGCCTTTTGTACGGCGACCCTCGGTTTAATTTTCAT     |       |       |       |       |       |       |       |
|                                                     | (1)     | -----                                                                            |       |       |       |       |       |       |       |

## SARS-CoV-2 &amp; Autographa californica nucleopolyhedrovirus.apr

|                                                     |         |                                                                                |       |       |       |       |       |       |       |
|-----------------------------------------------------|---------|--------------------------------------------------------------------------------|-------|-------|-------|-------|-------|-------|-------|
|                                                     |         | Section 652                                                                    |       |       |       |       |       |       |       |
| Autographa californica nucleopolyhedrovirus NC 0... | (50128) | 50128                                                                          | 50138 | 50149 | 50160 | 50171 | 50182 | 50193 | 50204 |
|                                                     | (50128) | TTGCTTTGACAAAAACCGTTTGTGCGTTTGTGTCACAACAAATTTATTATTTGTACAAAAATATTGACGCAATGGAGG |       |       |       |       |       |       |       |
| SARS-CoV-2 NC_045512.2                              | (1)     | -----                                                                          |       |       |       |       |       |       |       |
|                                                     |         | Section 653                                                                    |       |       |       |       |       |       |       |
| Autographa californica nucleopolyhedrovirus NC 0... | (50205) | 50205                                                                          | 50215 | 50226 | 50237 | 50248 | 50259 | 50270 | 50281 |
|                                                     | (50205) | CGTTGTTTAAATCTACACCATTGGTTTACGCGCTGTGGCAAAACATAAACATGAGCAGTTTGCACAGAGGCTAGAG   |       |       |       |       |       |       |       |
| SARS-CoV-2 NC_045512.2                              | (1)     | -----                                                                          |       |       |       |       |       |       |       |
|                                                     |         | Section 654                                                                    |       |       |       |       |       |       |       |
| Autographa californica nucleopolyhedrovirus NC 0... | (50282) | 50282                                                                          | 50292 | 50303 | 50314 | 50325 | 50336 | 50347 | 50358 |
|                                                     | (50282) | ATGTTGTTGCGTGATTTTTGCTTAATTGCCAGTTCAAACGCTAGTTATTTACTTTTTAAACAGCTTACACAGCTCAT  |       |       |       |       |       |       |       |
| SARS-CoV-2 NC_045512.2                              | (1)     | -----                                                                          |       |       |       |       |       |       |       |
|                                                     |         | Section 655                                                                    |       |       |       |       |       |       |       |
| Autographa californica nucleopolyhedrovirus NC 0... | (50359) | 50359                                                                          | 50369 | 50380 | 50391 | 50402 | 50413 | 50424 | 50435 |
|                                                     | (50359) | AGCTAACGAAGAAATGGTGTGCGGAGATGAAGAAATATTCAATTTAGGCGGCCAATTTGTAGACATGATTAAAGCG   |       |       |       |       |       |       |       |
| SARS-CoV-2 NC_045512.2                              | (1)     | -----                                                                          |       |       |       |       |       |       |       |
|                                                     |         | Section 656                                                                    |       |       |       |       |       |       |       |
| Autographa californica nucleopolyhedrovirus NC 0... | (50436) | 50436                                                                          | 50446 | 50457 | 50468 | 50479 | 50490 | 50501 | 50512 |
|                                                     | (50436) | GTGCTAAAGGCAGTCAAAATCTGATTAAAAGCACGCAACAATACCGACAGACTTTAAATACAGATATTGAAACTGTG  |       |       |       |       |       |       |       |
| SARS-CoV-2 NC_045512.2                              | (1)     | -----                                                                          |       |       |       |       |       |       |       |
|                                                     |         | Section 657                                                                    |       |       |       |       |       |       |       |
| Autographa californica nucleopolyhedrovirus NC 0... | (50513) | 50513                                                                          | 50523 | 50534 | 50545 | 50556 | 50567 | 50578 | 50589 |
|                                                     | (50513) | TCTTCACGAGCCACCACCAGTTTAAATAGTTACATATCTTCTCACAAATAAGGTAAAAGTGTGTGGCGCCGACATATA |       |       |       |       |       |       |       |
| SARS-CoV-2 NC_045512.2                              | (1)     | -----                                                                          |       |       |       |       |       |       |       |
|                                                     |         | Section 658                                                                    |       |       |       |       |       |       |       |
| Autographa californica nucleopolyhedrovirus NC 0... | (50590) | 50590                                                                          | 50600 | 50611 | 50622 | 50633 | 50644 | 50655 | 50666 |
|                                                     | (50590) | TCATAACACGGTTGTGTTACAGAGCGTGTTTATTAATAAATAACTATGTTTGTACAAAAACGACGAACGTACAATCA  |       |       |       |       |       |       |       |
| SARS-CoV-2 NC_045512.2                              | (1)     | -----                                                                          |       |       |       |       |       |       |       |

|                                                     |         |                                                                                |                       |                       |                       |                       |                       |                       |                       |
|-----------------------------------------------------|---------|--------------------------------------------------------------------------------|-----------------------|-----------------------|-----------------------|-----------------------|-----------------------|-----------------------|-----------------------|
|                                                     |         |                                                                                |                       |                       |                       |                       |                       |                       | Section 659           |
| Autographa californica nucleopolyhedrovirus NC 0... | (50667) | <a href="#">50667</a>                                                          | <a href="#">50677</a> | <a href="#">50688</a> | <a href="#">50699</a> | <a href="#">50710</a> | <a href="#">50721</a> | <a href="#">50732</a> | <a href="#">50743</a> |
|                                                     | (50667) | TGAATATTTGCGCTTTGCCCTCTGAGTTTCTGTTTCCAGAACATTTGCTCGACATGTTTCATTGAATGATAATATAAA |                       |                       |                       |                       |                       |                       |                       |
|                                                     | (1)     | -----                                                                          |                       |                       |                       |                       |                       |                       |                       |
|                                                     |         |                                                                                |                       |                       |                       |                       |                       |                       | Section 660           |
| Autographa californica nucleopolyhedrovirus NC 0... | (50744) | <a href="#">50744</a>                                                          | <a href="#">50754</a> | <a href="#">50765</a> | <a href="#">50776</a> | <a href="#">50787</a> | <a href="#">50798</a> | <a href="#">50809</a> | <a href="#">50820</a> |
|                                                     | (50744) | TAGAGCGCATTTGATTGCATGCAATCAGTGTTTTATTAATTTTAGAGCAACATGTACGATAAATTTATGATCTATCT  |                       |                       |                       |                       |                       |                       |                       |
|                                                     | (1)     | -----                                                                          |                       |                       |                       |                       |                       |                       |                       |
|                                                     |         |                                                                                |                       |                       |                       |                       |                       |                       | Section 661           |
| Autographa californica nucleopolyhedrovirus NC 0... | (50821) | <a href="#">50821</a>                                                          | <a href="#">50831</a> | <a href="#">50842</a> | <a href="#">50853</a> | <a href="#">50864</a> | <a href="#">50875</a> | <a href="#">50886</a> | <a href="#">50897</a> |
|                                                     | (50821) | TCACTTGAATGGGCTGCACGGAGAAGCAAAATACTACAAATATTTAATGTCTCAAATGGATTTTGAAAATCAAGTAG  |                       |                       |                       |                       |                       |                       |                       |
|                                                     | (1)     | -----                                                                          |                       |                       |                       |                       |                       |                       |                       |
|                                                     |         |                                                                                |                       |                       |                       |                       |                       |                       | Section 662           |
| Autographa californica nucleopolyhedrovirus NC 0... | (50898) | <a href="#">50898</a>                                                          | <a href="#">50908</a> | <a href="#">50919</a> | <a href="#">50930</a> | <a href="#">50941</a> | <a href="#">50952</a> | <a href="#">50963</a> | <a href="#">50974</a> |
|                                                     | (50898) | CCGATGAAATCAAGCGGTTTTGTGAAACTCGTCTGAAACCGGCAATCAGTTGCAACACTTTAACTGCGGAAAGTCTC  |                       |                       |                       |                       |                       |                       |                       |
|                                                     | (1)     | -----                                                                          |                       |                       |                       |                       |                       |                       |                       |
|                                                     |         |                                                                                |                       |                       |                       |                       |                       |                       | Section 663           |
| Autographa californica nucleopolyhedrovirus NC 0... | (50975) | <a href="#">50975</a>                                                          | <a href="#">50985</a> | <a href="#">50996</a> | <a href="#">51007</a> | <a href="#">51018</a> | <a href="#">51029</a> | <a href="#">51040</a> | <a href="#">51051</a> |
|                                                     | (50975) | AATACGCTCGTAGACAGCGTAGTCTGCAAAAATGGACTGTTAAATCCTTACGCCAAAGAAGTACAGTTTGCTTTGCA  |                       |                       |                       |                       |                       |                       |                       |
|                                                     | (1)     | -----                                                                          |                       |                       |                       |                       |                       |                       |                       |
|                                                     |         |                                                                                |                       |                       |                       |                       |                       |                       | Section 664           |
| Autographa californica nucleopolyhedrovirus NC 0... | (51052) | <a href="#">51052</a>                                                          | <a href="#">51062</a> | <a href="#">51073</a> | <a href="#">51084</a> | <a href="#">51095</a> | <a href="#">51106</a> | <a href="#">51117</a> | <a href="#">51128</a> |
|                                                     | (51052) | ATATCTTTTTGACGATGACGAAATATCCAAACGAGATCAAGATGGCTTTAACTATTTTTATTACATAATTATGACA   |                       |                       |                       |                       |                       |                       |                       |
|                                                     | (1)     | -----                                                                          |                       |                       |                       |                       |                       |                       |                       |
|                                                     |         |                                                                                |                       |                       |                       |                       |                       |                       | Section 665           |
| Autographa californica nucleopolyhedrovirus NC 0... | (51129) | <a href="#">51129</a>                                                          | <a href="#">51139</a> | <a href="#">51150</a> | <a href="#">51161</a> | <a href="#">51172</a> | <a href="#">51183</a> | <a href="#">51194</a> | <a href="#">51205</a> |
|                                                     | (51129) | GGTGTGAAAATATGGAAGAATATTTTTTAATTAACAATTTTAGCATAGCAGACTACGAATTTGAAGACATGTTTGAA  |                       |                       |                       |                       |                       |                       |                       |
|                                                     | (1)     | -----                                                                          |                       |                       |                       |                       |                       |                       |                       |

## SARS-CoV-2 &amp; Autographa californica nucleopolyhedrovirus.apr

|                                                     |         |                                                                                |       |       |       |       |       |       |       |
|-----------------------------------------------------|---------|--------------------------------------------------------------------------------|-------|-------|-------|-------|-------|-------|-------|
|                                                     |         | Section 666                                                                    |       |       |       |       |       |       |       |
| Autographa californica nucleopolyhedrovirus NC 0... | (51206) | 51206                                                                          | 51216 | 51227 | 51238 | 51249 | 51260 | 51271 | 51282 |
|                                                     | (51206) | ATTGTTTCGTATTGATTGTAGAGATCTGTTATTACTTCTTGCTAAATATAATATGTAATTAAAATTTTGTGTTTAA   |       |       |       |       |       |       |       |
|                                                     | (1)     | -----                                                                          |       |       |       |       |       |       |       |
|                                                     |         | Section 667                                                                    |       |       |       |       |       |       |       |
| Autographa californica nucleopolyhedrovirus NC 0... | (51283) | 51283                                                                          | 51293 | 51304 | 51315 | 51326 | 51337 | 51348 | 51359 |
|                                                     | (51283) | TTAAAATCCTGGATTAAAAAATGACGAATAATTTGATTTGCGTGCACGCCAACAAAGATTCTTCGTCATTATGATCAA |       |       |       |       |       |       |       |
|                                                     | (1)     | -----                                                                          |       |       |       |       |       |       |       |
|                                                     |         | Section 668                                                                    |       |       |       |       |       |       |       |
| Autographa californica nucleopolyhedrovirus NC 0... | (51360) | 51360                                                                          | 51370 | 51381 | 51392 | 51403 | 51414 | 51425 | 51436 |
|                                                     | (51360) | TGCGTGCATCAAGTTTATGCTTTTGTAATTGGCTTCTGACCACTTTAGCCATTTGAGCGTATCTGCATTTCGTCGTCT |       |       |       |       |       |       |       |
|                                                     | (1)     | -----                                                                          |       |       |       |       |       |       |       |
|                                                     |         | Section 669                                                                    |       |       |       |       |       |       |       |
| Autographa californica nucleopolyhedrovirus NC 0... | (51437) | 51437                                                                          | 51447 | 51458 | 51469 | 51480 | 51491 | 51502 | 51513 |
|                                                     | (51437) | AGAGTTTCAAACACCAGATCGGCGCAATTATAAAATCCTTCACCCACGGGATCTATGCGCTGCCAACGCACATACAT  |       |       |       |       |       |       |       |
|                                                     | (1)     | -----                                                                          |       |       |       |       |       |       |       |
|                                                     |         | Section 670                                                                    |       |       |       |       |       |       |       |
| Autographa californica nucleopolyhedrovirus NC 0... | (51514) | 51514                                                                          | 51524 | 51535 | 51546 | 51557 | 51568 | 51579 | 51590 |
|                                                     | (51514) | TACAAATTGATTTGACCTGTACGGTATTACTACGGGTATAGAATAGACTAGACTGTTGTACATAATGAATCGCCCG   |       |       |       |       |       |       |       |
|                                                     | (1)     | -----                                                                          |       |       |       |       |       |       |       |
|                                                     |         | Section 671                                                                    |       |       |       |       |       |       |       |
| Autographa californica nucleopolyhedrovirus NC 0... | (51591) | 51591                                                                          | 51601 | 51612 | 51623 | 51634 | 51645 | 51656 | 51667 |
|                                                     | (51591) | GATTTGGAATTAAATTTGAATCGTTACCACCTATGTATTCTAATTCGTTCCAAGTTATTGGATTGCGACGATCCAG   |       |       |       |       |       |       |       |
|                                                     | (1)     | -----                                                                          |       |       |       |       |       |       |       |
|                                                     |         | Section 672                                                                    |       |       |       |       |       |       |       |
| Autographa californica nucleopolyhedrovirus NC 0... | (51668) | 51668                                                                          | 51678 | 51689 | 51700 | 51711 | 51722 | 51733 | 51744 |
|                                                     | (51668) | TTTGATTTAGTAATAAACACCTTCAAAATAACTGGGCTCGTGTATGGCTGTTGGACAAAAATGAACATTCATCTGATA |       |       |       |       |       |       |       |
|                                                     | (1)     | -----                                                                          |       |       |       |       |       |       |       |



## SARS-CoV-2 &amp; Autographa californica nucleopolyhedrovirus.apr

|                                                     |         |                                                                                 |       |       |       |       |       |       |       |
|-----------------------------------------------------|---------|---------------------------------------------------------------------------------|-------|-------|-------|-------|-------|-------|-------|
|                                                     |         | Section 673                                                                     |       |       |       |       |       |       |       |
| Autographa californica nucleopolyhedrovirus NC 0... | (51745) | 51745                                                                           | 51755 | 51766 | 51777 | 51788 | 51799 | 51810 | 51821 |
|                                                     | (51745) | AACC GGTTGATAGCGATTTAAATATAGCGTATTTGGCCTCCAGTTGTTAAAAGGTTTCGTCCATTCCGCTTTTATCAC |       |       |       |       |       |       |       |
|                                                     | (1)     | -----                                                                           |       |       |       |       |       |       |       |
|                                                     |         | Section 674                                                                     |       |       |       |       |       |       |       |
| Autographa californica nucleopolyhedrovirus NC 0... | (51822) | 51822                                                                           | 51832 | 51843 | 51854 | 51865 | 51876 | 51887 | 51898 |
|                                                     | (51822) | CAAACACAGAATTGCGATCGTTTGAACCGGCACCGCAAAGTGTGTGCGGCACAACCCTTTGTTTGATTAGGTCAAAA   |       |       |       |       |       |       |       |
|                                                     | (1)     | -----                                                                           |       |       |       |       |       |       |       |
|                                                     |         | Section 675                                                                     |       |       |       |       |       |       |       |
| Autographa californica nucleopolyhedrovirus NC 0... | (51899) | 51899                                                                           | 51909 | 51920 | 51931 | 51942 | 51953 | 51964 | 51975 |
|                                                     | (51899) | TCGTCATAATTAGGACCGGCCACAGCCGCGTATTCCATATACTGTTGAAACATGTATTGCGCTGTGGAAGCGGCCGC   |       |       |       |       |       |       |       |
|                                                     | (1)     | -----                                                                           |       |       |       |       |       |       |       |
|                                                     |         | Section 676                                                                     |       |       |       |       |       |       |       |
| Autographa californica nucleopolyhedrovirus NC 0... | (51976) | 51976                                                                           | 51986 | 51997 | 52008 | 52019 | 52030 | 52041 | 52052 |
|                                                     | (51976) | CCCGGATTCTAAATCGAGAGCTCGATATTTATAATAGACTGATTTGTAAGCATTGCGGCACGCGGCGTCGGGAATGT   |       |       |       |       |       |       |       |
|                                                     | (1)     | -----                                                                           |       |       |       |       |       |       |       |
|                                                     |         | Section 677                                                                     |       |       |       |       |       |       |       |
| Autographa californica nucleopolyhedrovirus NC 0... | (52053) | 52053                                                                           | 52063 | 52074 | 52085 | 52096 | 52107 | 52118 | 52129 |
|                                                     | (52053) | TATCGCCATTGTCGGGCCAATAAAAGTTTCCATCTTTAAACATTTATATTGACGGGCCGTCGGCACGGACAAATAG    |       |       |       |       |       |       |       |
|                                                     | (1)     | -----                                                                           |       |       |       |       |       |       |       |
|                                                     |         | Section 678                                                                     |       |       |       |       |       |       |       |
| Autographa californica nucleopolyhedrovirus NC 0... | (52130) | 52130                                                                           | 52140 | 52151 | 52162 | 52173 | 52184 | 52195 | 52206 |
|                                                     | (52130) | CCGTGAGAGCGCACTGCCGGCGCGTGAATCGCAGCAAACAATGCAATTAATAATGCAATCATTATGATTATACTTAT   |       |       |       |       |       |       |       |
|                                                     | (1)     | -----                                                                           |       |       |       |       |       |       |       |
|                                                     |         | Section 679                                                                     |       |       |       |       |       |       |       |
| Autographa californica nucleopolyhedrovirus NC 0... | (52207) | 52207                                                                           | 52217 | 52228 | 52239 | 52250 | 52261 | 52272 | 52283 |
|                                                     | (52207) | AGAACACTAATCGGAATAATAACCGCTGTCGTAATCTTGGTCAAAAACGTTATGTTGAAACATAATAACACCTTACA   |       |       |       |       |       |       |       |
|                                                     | (1)     | -----                                                                           |       |       |       |       |       |       |       |

SARS-CoV-2 & Autographa californica nucleopolyhedrovirus.apr

|                                                                                |         |                                                                                  |                       |                       |                       |                       |                       |                       |                       |             |
|--------------------------------------------------------------------------------|---------|----------------------------------------------------------------------------------|-----------------------|-----------------------|-----------------------|-----------------------|-----------------------|-----------------------|-----------------------|-------------|
| Autographa californica nucleopolyhedrovirus NC 045512.2 SARS-CoV-2 NC_045512.2 | (52284) | <a href="#">52284</a>                                                            | <a href="#">52294</a> | <a href="#">52305</a> | <a href="#">52316</a> | <a href="#">52327</a> | <a href="#">52338</a> | <a href="#">52349</a> | <a href="#">52360</a> | Section 680 |
|                                                                                | (52284) | GTAACATACAATAAAACAACATAGTATCGTATATAATTATAAACTTTATTTTTTCATTTTATACAAACAAAATTTAT    |                       |                       |                       |                       |                       |                       |                       |             |
|                                                                                | (1)     | -----                                                                            |                       |                       |                       |                       |                       |                       |                       |             |
| Autographa californica nucleopolyhedrovirus NC 045512.2 SARS-CoV-2 NC_045512.2 | (52361) | <a href="#">52361</a>                                                            | <a href="#">52371</a> | <a href="#">52382</a> | <a href="#">52393</a> | <a href="#">52404</a> | <a href="#">52415</a> | <a href="#">52426</a> | <a href="#">52437</a> | Section 681 |
|                                                                                | (52361) | ACGTATTGTTAGCACATTGAGTGTCAATTTTCGCTGTCTGAACTATCACAATCATCGTCATCATCATCATCATATTGTCA |                       |                       |                       |                       |                       |                       |                       |             |
|                                                                                | (1)     | -----                                                                            |                       |                       |                       |                       |                       |                       |                       |             |
| Autographa californica nucleopolyhedrovirus NC 045512.2 SARS-CoV-2 NC_045512.2 | (52438) | <a href="#">52438</a>                                                            | <a href="#">52448</a> | <a href="#">52459</a> | <a href="#">52470</a> | <a href="#">52481</a> | <a href="#">52492</a> | <a href="#">52503</a> | <a href="#">52514</a> | Section 682 |
|                                                                                | (52438) | TCGTCGTCGTCACGTTTGCGTTTGACACTGCATTTTTTTTGGTTAATTTTCACTAACACTGGTTCTTTTCGATCGTA    |                       |                       |                       |                       |                       |                       |                       |             |
|                                                                                | (1)     | -----                                                                            |                       |                       |                       |                       |                       |                       |                       |             |
| Autographa californica nucleopolyhedrovirus NC 045512.2 SARS-CoV-2 NC_045512.2 | (52515) | <a href="#">52515</a>                                                            | <a href="#">52525</a> | <a href="#">52536</a> | <a href="#">52547</a> | <a href="#">52558</a> | <a href="#">52569</a> | <a href="#">52580</a> | <a href="#">52591</a> | Section 683 |
|                                                                                | (52515) | CAATTGATTCTGCATGTACTTTTGCATGATCGCGTAAACACTTTGCAATTTTATCCTTTTGTTCGTCGCCAAATA      |                       |                       |                       |                       |                       |                       |                       |             |
|                                                                                | (1)     | -----                                                                            |                       |                       |                       |                       |                       |                       |                       |             |
| Autographa californica nucleopolyhedrovirus NC 045512.2 SARS-CoV-2 NC_045512.2 | (52592) | <a href="#">52592</a>                                                            | <a href="#">52602</a> | <a href="#">52613</a> | <a href="#">52624</a> | <a href="#">52635</a> | <a href="#">52646</a> | <a href="#">52657</a> | <a href="#">52668</a> | Section 684 |
|                                                                                | (52592) | TTTCCAGCAACTCGTTCATAAATGTGCACAAAATGCCATGTGTTTTATCCAGCTGATTGCGATTTTCACTGGATCG     |                       |                       |                       |                       |                       |                       |                       |             |
|                                                                                | (1)     | -----                                                                            |                       |                       |                       |                       |                       |                       |                       |             |
| Autographa californica nucleopolyhedrovirus NC 045512.2 SARS-CoV-2 NC_045512.2 | (52669) | <a href="#">52669</a>                                                            | <a href="#">52679</a> | <a href="#">52690</a> | <a href="#">52701</a> | <a href="#">52712</a> | <a href="#">52723</a> | <a href="#">52734</a> | <a href="#">52745</a> | Section 685 |
|                                                                                | (52669) | AACAAACGCAAGGGGTACGCTTTTTCTGTTACCTTGCCTTCGATGTCTATCAAAAGGTACGGGATACGATCTCCGTT    |                       |                       |                       |                       |                       |                       |                       |             |
|                                                                                | (1)     | -----                                                                            |                       |                       |                       |                       |                       |                       |                       |             |
| Autographa californica nucleopolyhedrovirus NC 045512.2 SARS-CoV-2 NC_045512.2 | (52746) | <a href="#">52746</a>                                                            | <a href="#">52756</a> | <a href="#">52767</a> | <a href="#">52778</a> | <a href="#">52789</a> | <a href="#">52800</a> | <a href="#">52811</a> | <a href="#">52822</a> | Section 686 |
|                                                                                | (52746) | GCCGGGCACAAAATCCGTGCCTTTGTTAACCAAAATTTCTCTACAATGCCTAGCCACCGTAATCACGCGTCTTTTGG    |                       |                       |                       |                       |                       |                       |                       |             |
|                                                                                | (1)     | -----                                                                            |                       |                       |                       |                       |                       |                       |                       |             |

## SARS-CoV-2 &amp; Autographa californica nucleopolyhedrovirus.apr

|                                                     |         |                                                                                |       |       |       |       |       |       |       |
|-----------------------------------------------------|---------|--------------------------------------------------------------------------------|-------|-------|-------|-------|-------|-------|-------|
|                                                     |         | Section 687                                                                    |       |       |       |       |       |       |       |
| Autographa californica nucleopolyhedrovirus NC 0... | (52823) | 52823                                                                          | 52833 | 52844 | 52855 | 52866 | 52877 | 52888 | 52899 |
|                                                     | (52823) | GTGACGGACCCTCATTATCGTCAGTTGATTGCGTTTTTTGCCCGGGTTATCGTTATAGGTCATACTAAAGCTGTAG   |       |       |       |       |       |       |       |
|                                                     | (1)     | -----                                                                          |       |       |       |       |       |       |       |
|                                                     |         | Section 688                                                                    |       |       |       |       |       |       |       |
| Autographa californica nucleopolyhedrovirus NC 0... | (52900) | 52900                                                                          | 52910 | 52921 | 52932 | 52943 | 52954 | 52965 | 52976 |
|                                                     | (52900) | TCGGTCAACGATTTTGATTTGGCAAACATCATCATAGTATTCATAAAAACTAGTCTGTAAACTTTGCAAACATTTGTC |       |       |       |       |       |       |       |
|                                                     | (1)     | -----                                                                          |       |       |       |       |       |       |       |
|                                                     |         | Section 689                                                                    |       |       |       |       |       |       |       |
| Autographa californica nucleopolyhedrovirus NC 0... | (52977) | 52977                                                                          | 52987 | 52998 | 53009 | 53020 | 53031 | 53042 | 53053 |
|                                                     | (52977) | CATGTCCAAATGACGCAATATTTGTTCCACTGCCGTCCTAAACGCGATTCTCATAAAAACGGGCATATCCTTTTTTAA |       |       |       |       |       |       |       |
|                                                     | (1)     | -----                                                                          |       |       |       |       |       |       |       |
|                                                     |         | Section 690                                                                    |       |       |       |       |       |       |       |
| Autographa californica nucleopolyhedrovirus NC 0... | (53054) | 53054                                                                          | 53064 | 53075 | 53086 | 53097 | 53108 | 53119 | 53130 |
|                                                     | (53054) | CTAACCAACCCTTGTATACGATTTTATTCTCACTGTTGAGATAGCAATATTTTTCTTTTTTAATAGTATTAAACT    |       |       |       |       |       |       |       |
|                                                     | (1)     | -----                                                                          |       |       |       |       |       |       |       |
|                                                     |         | Section 691                                                                    |       |       |       |       |       |       |       |
| Autographa californica nucleopolyhedrovirus NC 0... | (53131) | 53131                                                                          | 53141 | 53152 | 53163 | 53174 | 53185 | 53196 | 53207 |
|                                                     | (53131) | TTCATTAAATTTTCAAATGCCATTTTGTAAACCGTCCGTGAATGAGTTATTAACGCGTGTCTCAACATGTGTGCATAT |       |       |       |       |       |       |       |
|                                                     | (1)     | -----                                                                          |       |       |       |       |       |       |       |
|                                                     |         | Section 692                                                                    |       |       |       |       |       |       |       |
| Autographa californica nucleopolyhedrovirus NC 0... | (53208) | 53208                                                                          | 53218 | 53229 | 53240 | 53251 | 53262 | 53273 | 53284 |
|                                                     | (53208) | TTGTTTTAATGTGTGCGGTTTCGTTGGATATTTGTTATAGTTAAATGTGGGCAAAACAAATGTAGAATCTGTGTCGC  |       |       |       |       |       |       |       |
|                                                     | (1)     | -----                                                                          |       |       |       |       |       |       |       |
|                                                     |         | Section 693                                                                    |       |       |       |       |       |       |       |
| Autographa californica nucleopolyhedrovirus NC 0... | (53285) | 53285                                                                          | 53295 | 53306 | 53317 | 53328 | 53339 | 53350 | 53361 |
|                                                     | (53285) | CGTACACAACTTTAAAGTGATGCTGCCAGATTGAATTTTTCTAAAACTCAGGGTCGTTGCTCAAACCTTCAATC     |       |       |       |       |       |       |       |
|                                                     | (1)     | -----                                                                          |       |       |       |       |       |       |       |

## SARS-CoV-2 &amp; Autographa californica nucleopolyhedrovirus.apr

|                                                     |         |                                                                                |       |       |       |       |       |             |
|-----------------------------------------------------|---------|--------------------------------------------------------------------------------|-------|-------|-------|-------|-------|-------------|
|                                                     |         | Section 694                                                                    |       |       |       |       |       |             |
| Autographa californica nucleopolyhedrovirus NC 0... | (53362) | 53362                                                                          | 53372 | 53383 | 53394 | 53405 | 53416 | 53427 53438 |
|                                                     | (53362) | AGAGAAATGGCCAGCCGCAACTGATTGCGACCAACTCTAGTGATGTAGTTTGCAAGCACTTTGTAAAAAATGCCATA  |       |       |       |       |       |             |
|                                                     | (1)     | -----                                                                          |       |       |       |       |       |             |
|                                                     |         | Section 695                                                                    |       |       |       |       |       |             |
| Autographa californica nucleopolyhedrovirus NC 0... | (53439) | 53439                                                                          | 53449 | 53460 | 53471 | 53482 | 53493 | 53504 53515 |
|                                                     | (53439) | ATAACCGTATATGCTATTGGCGGTGCGCTTCACGGAATTTTGTGTTTTGATCGTACAGATCGTACAAGAATGCCGATT |       |       |       |       |       |             |
|                                                     | (1)     | -----                                                                          |       |       |       |       |       |             |
|                                                     |         | Section 696                                                                    |       |       |       |       |       |             |
| Autographa californica nucleopolyhedrovirus NC 0... | (53516) | 53516                                                                          | 53526 | 53537 | 53548 | 53559 | 53570 | 53581 53592 |
|                                                     | (53516) | CGCTTTGATTGTCGCGATTCTTTTTAAATTTGCACCTTCGCTTAACAATTTAATAGCAATTTAACAACCTATTGCA   |       |       |       |       |       |             |
|                                                     | (1)     | -----                                                                          |       |       |       |       |       |             |
|                                                     |         | Section 697                                                                    |       |       |       |       |       |             |
| Autographa californica nucleopolyhedrovirus NC 0... | (53593) | 53593                                                                          | 53603 | 53614 | 53625 | 53636 | 53647 | 53658 53669 |
|                                                     | (53593) | CGCGAATTGTGGTTCAAATACACGTTGCCGTCTTCGCATAAAATTAAATTGGACAAACAAGCACAAATGGCTATCAT  |       |       |       |       |       |             |
|                                                     | (1)     | -----                                                                          |       |       |       |       |       |             |
|                                                     |         | Section 698                                                                    |       |       |       |       |       |             |
| Autographa californica nucleopolyhedrovirus NC 0... | (53670) | 53670                                                                          | 53680 | 53691 | 53702 | 53713 | 53724 | 53735 53746 |
|                                                     | (53670) | TATAGTCAAGTACAAAGAATTAAAAATCGAGAGAAAACGCGTTCTTGTAATGCCTGCACGAGGTTTTAACACTTTGC  |       |       |       |       |       |             |
|                                                     | (1)     | -----                                                                          |       |       |       |       |       |             |
|                                                     |         | Section 699                                                                    |       |       |       |       |       |             |
| Autographa californica nucleopolyhedrovirus NC 0... | (53747) | 53747                                                                          | 53757 | 53768 | 53779 | 53790 | 53801 | 53812 53823 |
|                                                     | (53747) | CGCCTTTGTACTTGACCGTTTGATTGGCGGGTCCCAAATTGATGGCATCTTTAGGTATGTTTTTTAGAGGTATCAAT  |       |       |       |       |       |             |
|                                                     | (1)     | -----                                                                          |       |       |       |       |       |             |
|                                                     |         | Section 700                                                                    |       |       |       |       |       |             |
| Autographa californica nucleopolyhedrovirus NC 0... | (53824) | 53824                                                                          | 53834 | 53845 | 53856 | 53867 | 53878 | 53889 53900 |
|                                                     | (53824) | TTTCCTTTGAGATTAGAAATACCCGCTGCGGCTTTGTCGGCTTTGAATTGGCCCCGATATTATTGACAGATCGTTTTT |       |       |       |       |       |             |
|                                                     | (1)     | -----                                                                          |       |       |       |       |       |             |

## SARS-CoV-2 &amp; Autographa californica nucleopolyhedrovirus.apr

|                                                     |         |                                                                               |       |       |       |       |       |       |       |
|-----------------------------------------------------|---------|-------------------------------------------------------------------------------|-------|-------|-------|-------|-------|-------|-------|
|                                                     |         | Section 701                                                                   |       |       |       |       |       |       |       |
| Autographa californica nucleopolyhedrovirus NC 0... | (53901) | 53901                                                                         | 53911 | 53922 | 53933 | 53944 | 53955 | 53966 | 53977 |
|                                                     | (53901) | GTTAAAAAATACGGGTCAGGCTCCTCTTTGCCGGTGCTCTCGTTAATGCGCGTGTTTGTGATGGCTGCGTAAAAGC  |       |       |       |       |       |       |       |
| SARS-CoV-2 NC_045512.2                              | (1)     | -----                                                                         |       |       |       |       |       |       |       |
|                                                     |         | Section 702                                                                   |       |       |       |       |       |       |       |
| Autographa californica nucleopolyhedrovirus NC 0... | (53978) | 53978                                                                         | 53988 | 53999 | 54010 | 54021 | 54032 | 54043 | 54054 |
|                                                     | (53978) | ACGCCACGCTAATCAAATGCGAAATATTACATATCACGTCGTCTGTACACAAACGATGCAATATACATTGCGAATAT |       |       |       |       |       |       |       |
| SARS-CoV-2 NC_045512.2                              | (1)     | -----                                                                         |       |       |       |       |       |       |       |
|                                                     |         | Section 703                                                                   |       |       |       |       |       |       |       |
| Autographa californica nucleopolyhedrovirus NC 0... | (54055) | 54055                                                                         | 54065 | 54076 | 54087 | 54098 | 54109 | 54120 | 54131 |
|                                                     | (54055) | ACAGAATCGGCCATTTTCAATTTGACAAACAATTTTATCGGCAACATGCAATCCTGCACGTTGTACTTGGCAATCAC |       |       |       |       |       |       |       |
| SARS-CoV-2 NC_045512.2                              | (1)     | -----                                                                         |       |       |       |       |       |       |       |
|                                                     |         | Section 704                                                                   |       |       |       |       |       |       |       |
| Autographa californica nucleopolyhedrovirus NC 0... | (54132) | 54132                                                                         | 54142 | 54153 | 54164 | 54175 | 54186 | 54197 | 54208 |
|                                                     | (54132) | GTCCAGCCGTCGAGTGTTGTACATCTTGACCATTTCCGGTCCAAGGCAAATCGATTTTGTTCACCCAAATAGTAAC  |       |       |       |       |       |       |       |
| SARS-CoV-2 NC_045512.2                              | (1)     | -----                                                                         |       |       |       |       |       |       |       |
|                                                     |         | Section 705                                                                   |       |       |       |       |       |       |       |
| Autographa californica nucleopolyhedrovirus NC 0... | (54209) | 54209                                                                         | 54219 | 54230 | 54241 | 54252 | 54263 | 54274 | 54285 |
|                                                     | (54209) | TACTGATTGTGTTCAATTGAAAGTTTTCAACTTTATGCTGATTAGAATCGCTGCTGAAAAATTTATACAAATCAATG |       |       |       |       |       |       |       |
| SARS-CoV-2 NC_045512.2                              | (1)     | -----                                                                         |       |       |       |       |       |       |       |
|                                                     |         | Section 706                                                                   |       |       |       |       |       |       |       |
| Autographa californica nucleopolyhedrovirus NC 0... | (54286) | 54286                                                                         | 54296 | 54307 | 54318 | 54329 | 54340 | 54351 | 54362 |
|                                                     | (54286) | TGAATGTAATAGTTAAAATAATACGTGTCCACTTTGTTGCCCACTTGTTTATAAACAGCTTTGTCGTCGGCGCCGC  |       |       |       |       |       |       |       |
| SARS-CoV-2 NC_045512.2                              | (1)     | -----                                                                         |       |       |       |       |       |       |       |
|                                                     |         | Section 707                                                                   |       |       |       |       |       |       |       |
| Autographa californica nucleopolyhedrovirus NC 0... | (54363) | 54363                                                                         | 54373 | 54384 | 54395 | 54406 | 54417 | 54428 | 54439 |
|                                                     | (54363) | AGCCGGCAAATCGTAACGCTTTAATAGCATTTTGGTTTTATTCAATCGTCCAAGTATATAGGGCAGATCAAATACGT |       |       |       |       |       |       |       |
| SARS-CoV-2 NC_045512.2                              | (1)     | -----                                                                         |       |       |       |       |       |       |       |

## SARS-CoV-2 &amp; Autographa californica nucleopolyhedrovirus.apr

|                                                     |         |                                                                                |       |       |       |       |       |       |             |
|-----------------------------------------------------|---------|--------------------------------------------------------------------------------|-------|-------|-------|-------|-------|-------|-------------|
|                                                     |         |                                                                                |       |       |       |       |       |       | Section 708 |
| Autographa californica nucleopolyhedrovirus NC 0... | (54440) | 54440                                                                          | 54450 | 54461 | 54472 | 54483 | 54494 | 54505 | 54516       |
|                                                     | (54440) | CTCCGTTAAAATCCAAAATCACATCGGGATTTGTAATTTTATCATGTCAAAAAACGCTGTAATCATGTCGATTTC    |       |       |       |       |       |       |             |
|                                                     | (1)     | -----                                                                          |       |       |       |       |       |       |             |
|                                                     |         |                                                                                |       |       |       |       |       |       | Section 709 |
| Autographa californica nucleopolyhedrovirus NC 0... | (54517) | 54517                                                                          | 54527 | 54538 | 54549 | 54560 | 54571 | 54582 | 54593       |
|                                                     | (54517) | TTTTGAAACATGACCACATACGTGTCATCGTCATAGGTCTCTGGAATCTGGGTCGGCAGCTTGTGATACATAAAACA  |       |       |       |       |       |       |             |
|                                                     | (1)     | -----                                                                          |       |       |       |       |       |       |             |
|                                                     |         |                                                                                |       |       |       |       |       |       | Section 710 |
| Autographa californica nucleopolyhedrovirus NC 0... | (54594) | 54594                                                                          | 54604 | 54615 | 54626 | 54637 | 54648 | 54659 | 54670       |
|                                                     | (54594) | AAATTTTGCATACTCGTCGTTTTTGTACACCACAAATCCTATAGACATTATGCAATCAACCGATGCTTTTCGACATGT |       |       |       |       |       |       |             |
|                                                     | (1)     | -----                                                                          |       |       |       |       |       |       |             |
|                                                     |         |                                                                                |       |       |       |       |       |       | Section 711 |
| Autographa californica nucleopolyhedrovirus NC 0... | (54671) | 54671                                                                          | 54681 | 54692 | 54703 | 54714 | 54725 | 54736 | 54747       |
|                                                     | (54671) | TGTGGCCGTCCGAATGAGTCTCAATGTCATAGCACGACAAAACGGGCATGATGCCGCTGGTTAAAGTCATTTTCATCG |       |       |       |       |       |       |             |
|                                                     | (1)     | -----                                                                          |       |       |       |       |       |       |             |
|                                                     |         |                                                                                |       |       |       |       |       |       | Section 712 |
| Autographa californica nucleopolyhedrovirus NC 0... | (54748) | 54748                                                                          | 54758 | 54769 | 54780 | 54791 | 54802 | 54813 | 54824       |
|                                                     | (54748) | ACCAACTCAAAGTCTTCATTAAAAATGTTGCAAATTAAACATGCGCGTCGTCGATCCACCGACATAGTTATTTTGGCA |       |       |       |       |       |       |             |
|                                                     | (1)     | -----                                                                          |       |       |       |       |       |       |             |
|                                                     |         |                                                                                |       |       |       |       |       |       | Section 713 |
| Autographa californica nucleopolyhedrovirus NC 0... | (54825) | 54825                                                                          | 54835 | 54846 | 54857 | 54868 | 54879 | 54890 | 54901       |
|                                                     | (54825) | GCGTTGTGTTTTCTTGAATCGCATATAGGCGCCTTCCACAAACGGCGTTTGCATGTGTACGCGATTAAACGTTGTGAA |       |       |       |       |       |       |             |
|                                                     | (1)     | -----                                                                          |       |       |       |       |       |       |             |
|                                                     |         |                                                                                |       |       |       |       |       |       | Section 714 |
| Autographa californica nucleopolyhedrovirus NC 0... | (54902) | 54902                                                                          | 54912 | 54923 | 54934 | 54945 | 54956 | 54967 | 54978       |
|                                                     | (54902) | GAAACTTGTCCAAACACGCCGCGTTGTCCGATGGCGCTGCTTTGTTTCTTTCGTATTTAATCACGTTTATCTTGTTTC |       |       |       |       |       |       |             |
|                                                     | (1)     | -----                                                                          |       |       |       |       |       |       |             |

## SARS-CoV-2 &amp; Autographa californica nucleopolyhedrovirus.apr

|                                                     |         |                                                                               |       |       |       |       |       |       |       |
|-----------------------------------------------------|---------|-------------------------------------------------------------------------------|-------|-------|-------|-------|-------|-------|-------|
|                                                     |         | Section 715                                                                   |       |       |       |       |       |       |       |
| Autographa californica nucleopolyhedrovirus NC 0... | (54979) | 54979                                                                         | 54989 | 55000 | 55011 | 55022 | 55033 | 55044 | 55055 |
|                                                     | (54979) | AAATAATTTCTTCCACGCCCGGCGCCACAAACGTGGTGTAGCTGATGCACTTGTTGCGGCAAGACGGAAATATGTG  |       |       |       |       |       |       |       |
|                                                     | (1)     | -----                                                                         |       |       |       |       |       |       |       |
|                                                     |         | Section 716                                                                   |       |       |       |       |       |       |       |
| Autographa californica nucleopolyhedrovirus NC 0... | (55056) | 55056                                                                         | 55066 | 55077 | 55088 | 55099 | 55110 | 55121 | 55132 |
|                                                     | (55056) | CTTGTCGTAGCATTGTTTGTAAAGAATACAAATTTAGTTTTACTTTAAAGTAAACTGCAGCACTCGTTCTTTGATAT |       |       |       |       |       |       |       |
|                                                     | (1)     | -----                                                                         |       |       |       |       |       |       |       |
|                                                     |         | Section 717                                                                   |       |       |       |       |       |       |       |
| Autographa californica nucleopolyhedrovirus NC 0... | (55133) | 55133                                                                         | 55143 | 55154 | 55165 | 55176 | 55187 | 55198 | 55209 |
|                                                     | (55133) | TTGTATTACAAAATGCAAACAAGCAACCTTGTTTTTCATCGTAATGCAAACGAATGATACGAAACGTATCGGCTGAA |       |       |       |       |       |       |       |
|                                                     | (1)     | -----                                                                         |       |       |       |       |       |       |       |
|                                                     |         | Section 718                                                                   |       |       |       |       |       |       |       |
| Autographa californica nucleopolyhedrovirus NC 0... | (55210) | 55210                                                                         | 55220 | 55231 | 55242 | 55253 | 55264 | 55275 | 55286 |
|                                                     | (55210) | GTAATATTGAATTCTCCTGGTTTTGCATATTCTGCAAAGCGCGTTTTGAGTTCATTGTAAGGATATATTTTCATTTT |       |       |       |       |       |       |       |
|                                                     | (1)     | -----                                                                         |       |       |       |       |       |       |       |
|                                                     |         | Section 719                                                                   |       |       |       |       |       |       |       |
| Autographa californica nucleopolyhedrovirus NC 0... | (55287) | 55287                                                                         | 55297 | 55308 | 55319 | 55330 | 55341 | 55352 | 55363 |
|                                                     | (55287) | TAAATATGCAGCGATGGCCCAAATATGGAGGCACAGACGTCAACACGCGCACTGTACACGATTTGTTAAACACCATA |       |       |       |       |       |       |       |
|                                                     | (1)     | -----                                                                         |       |       |       |       |       |       |       |
|                                                     |         | Section 720                                                                   |       |       |       |       |       |       |       |
| Autographa californica nucleopolyhedrovirus NC 0... | (55364) | 55364                                                                         | 55374 | 55385 | 55396 | 55407 | 55418 | 55429 | 55440 |
|                                                     | (55364) | AACACCATGAGTGCTCGAATCAAACTCTGGAGCGGTATGAGCACGCTTTGCGAGAGATTACAAAGTCGTTGTAAT   |       |       |       |       |       |       |       |
|                                                     | (1)     | -----                                                                         |       |       |       |       |       |       |       |
|                                                     |         | Section 721                                                                   |       |       |       |       |       |       |       |
| Autographa californica nucleopolyhedrovirus NC 0... | (55441) | 55441                                                                         | 55451 | 55462 | 55473 | 55484 | 55495 | 55506 | 55517 |
|                                                     | (55441) | TTTGAAACCGTCCGCGAACACACATAGCTTTGAACCCGACGCTCTGCCGGCGTTGATTATGCAATTTTTATCGGATT |       |       |       |       |       |       |       |
|                                                     | (1)     | -----                                                                         |       |       |       |       |       |       |       |

## SARS-CoV-2 &amp; Autographa californica nucleopolyhedrovirus.apr

|                                                     |         |                                                                                |       |       |       |       |       |       |       |
|-----------------------------------------------------|---------|--------------------------------------------------------------------------------|-------|-------|-------|-------|-------|-------|-------|
|                                                     |         | Section 722                                                                    |       |       |       |       |       |       |       |
| Autographa californica nucleopolyhedrovirus NC 0... | (55518) | 55518                                                                          | 55528 | 55539 | 55550 | 55561 | 55572 | 55583 | 55594 |
|                                                     | (55518) | TCGCCGGCCGAGATATCAACACGTTGACGCACAACATCAACTACAAGTACGATTACAATTATCCGCCGGCGCCCGTG  |       |       |       |       |       |       |       |
| SARS-CoV-2 NC_045512.2                              | (1)     | -----                                                                          |       |       |       |       |       |       |       |
|                                                     |         | Section 723                                                                    |       |       |       |       |       |       |       |
| Autographa californica nucleopolyhedrovirus NC 0... | (55595) | 55595                                                                          | 55605 | 55616 | 55627 | 55638 | 55649 | 55660 | 55671 |
|                                                     | (55595) | CCCGCGATGCAACCACCGCCACCGCCTCTCAACCCCCGCGCCACCTCAACCACCGTATTACAACAATTATCCGTA    |       |       |       |       |       |       |       |
| SARS-CoV-2 NC_045512.2                              | (1)     | -----                                                                          |       |       |       |       |       |       |       |
|                                                     |         | Section 724                                                                    |       |       |       |       |       |       |       |
| Autographa californica nucleopolyhedrovirus NC 0... | (55672) | 55672                                                                          | 55682 | 55693 | 55704 | 55715 | 55726 | 55737 | 55748 |
|                                                     | (55672) | TTATCCGCCGTATCCGTTTTTCGACACCGCCGCCAACACAGCCGCCAGAATCGAACGTCGCGGGCGTCGGCGGCTCGC |       |       |       |       |       |       |       |
| SARS-CoV-2 NC_045512.2                              | (1)     | -----                                                                          |       |       |       |       |       |       |       |
|                                                     |         | Section 725                                                                    |       |       |       |       |       |       |       |
| Autographa californica nucleopolyhedrovirus NC 0... | (55749) | 55749                                                                          | 55759 | 55770 | 55781 | 55792 | 55803 | 55814 | 55825 |
|                                                     | (55749) | AAAGTTTGAATCAAATCACGTTGACTAACGAGGAGGAGTCTGAACTGGCGGCTTTATTTAAAAACATGCAAACGAAC  |       |       |       |       |       |       |       |
| SARS-CoV-2 NC_045512.2                              | (1)     | -----                                                                          |       |       |       |       |       |       |       |
|                                                     |         | Section 726                                                                    |       |       |       |       |       |       |       |
| Autographa californica nucleopolyhedrovirus NC 0... | (55826) | 55826                                                                          | 55836 | 55847 | 55858 | 55869 | 55880 | 55891 | 55902 |
|                                                     | (55826) | ATGACTTGGGAAC TTGTTCAAAATTTGTTGAAGTGTTAATCAGGATCGTACGCGTGCACGTAGTAAACAACGTGAC  |       |       |       |       |       |       |       |
| SARS-CoV-2 NC_045512.2                              | (1)     | -----                                                                          |       |       |       |       |       |       |       |
|                                                     |         | Section 727                                                                    |       |       |       |       |       |       |       |
| Autographa californica nucleopolyhedrovirus NC 0... | (55903) | 55903                                                                          | 55913 | 55924 | 55935 | 55946 | 55957 | 55968 | 55979 |
|                                                     | (55903) | CATGATTAACGTTATATCGTCTATAACTCCGTTTGAACATTAATTGATTACAATTTTACAGAATTTATTAGATGCG   |       |       |       |       |       |       |       |
| SARS-CoV-2 NC_045512.2                              | (1)     | -----                                                                          |       |       |       |       |       |       |       |
|                                                     |         | Section 728                                                                    |       |       |       |       |       |       |       |
| Autographa californica nucleopolyhedrovirus NC 0... | (55980) | 55980                                                                          | 55990 | 56001 | 56012 | 56023 | 56034 | 56045 | 56056 |
|                                                     | (55980) | TATACCAAAAAACAAACATACGTTTTTGCAATAGATCAGTATCTGTGCACTAACATAGTTACGTTTATAGATTTTTTT |       |       |       |       |       |       |       |
| SARS-CoV-2 NC_045512.2                              | (1)     | -----                                                                          |       |       |       |       |       |       |       |



## SARS-CoV-2 &amp; Autographa californica nucleopolyhedrovirus.apr

|                                                     |         |                                                                                |       |       |       |       |       |       |       |
|-----------------------------------------------------|---------|--------------------------------------------------------------------------------|-------|-------|-------|-------|-------|-------|-------|
|                                                     |         | Section 729                                                                    |       |       |       |       |       |       |       |
| Autographa californica nucleopolyhedrovirus NC 0... | (56057) | 56057                                                                          | 56067 | 56078 | 56089 | 56100 | 56111 | 56122 | 56133 |
|                                                     | (56057) | ACTAGAGTCTTTTATTTGGTGATGCGAACAAATTTTCAGTTCACCACTTTTGACCAATTGACCCAATACTCTAACGA  |       |       |       |       |       |       |       |
| SARS-CoV-2 NC_045512.2                              | (1)     | -----                                                                          |       |       |       |       |       |       |       |
|                                                     |         | Section 730                                                                    |       |       |       |       |       |       |       |
| Autographa californica nucleopolyhedrovirus NC 0... | (56134) | 56134                                                                          | 56144 | 56155 | 56166 | 56177 | 56188 | 56199 | 56210 |
|                                                     | (56134) | ACTTTACACAAGAATTCAAACGAGCATACTTCAAAGCGCGGCTCCTCTTTCTCCTCCGACCGTGGAACGGTCAACA   |       |       |       |       |       |       |       |
| SARS-CoV-2 NC_045512.2                              | (1)     | -----                                                                          |       |       |       |       |       |       |       |
|                                                     |         | Section 731                                                                    |       |       |       |       |       |       |       |
| Autographa californica nucleopolyhedrovirus NC 0... | (56211) | 56211                                                                          | 56221 | 56232 | 56243 | 56254 | 56265 | 56276 | 56287 |
|                                                     | (56211) | GCGATATCGTCATTTCAAATTTGCAAGAACAATTAAAAAGAGAACGCGCTTTGATGCAACAAATCAGCGAGCAACAT  |       |       |       |       |       |       |       |
| SARS-CoV-2 NC_045512.2                              | (1)     | -----                                                                          |       |       |       |       |       |       |       |
|                                                     |         | Section 732                                                                    |       |       |       |       |       |       |       |
| Autographa californica nucleopolyhedrovirus NC 0... | (56288) | 56288                                                                          | 56298 | 56309 | 56320 | 56331 | 56342 | 56353 | 56364 |
|                                                     | (56288) | AGAATTGCAAACGAAAGAGTGGAACCTCTGCAATCGCAATACGACGAGTTGGATTTAAAGTATAAAGAGATATTTGA  |       |       |       |       |       |       |       |
| SARS-CoV-2 NC_045512.2                              | (1)     | -----                                                                          |       |       |       |       |       |       |       |
|                                                     |         | Section 733                                                                    |       |       |       |       |       |       |       |
| Autographa californica nucleopolyhedrovirus NC 0... | (56365) | 56365                                                                          | 56375 | 56386 | 56397 | 56408 | 56419 | 56430 | 56441 |
|                                                     | (56365) | AGACAAAAGTGAATTTCGCACAACAAAAAAGTGAAAACGTGCGAAAAATTAAACAATTAGAGAGATCCAACAAAGAAC |       |       |       |       |       |       |       |
| SARS-CoV-2 NC_045512.2                              | (1)     | -----                                                                          |       |       |       |       |       |       |       |
|                                                     |         | Section 734                                                                    |       |       |       |       |       |       |       |
| Autographa californica nucleopolyhedrovirus NC 0... | (56442) | 56442                                                                          | 56452 | 56463 | 56474 | 56485 | 56496 | 56507 | 56518 |
|                                                     | (56442) | TCAACGACACCGTACAGAAATTGAGAGATGAAAATGCCGAAAGATTGTCTGAAATACAATTGCAAAAAGGCGATTTG  |       |       |       |       |       |       |       |
| SARS-CoV-2 NC_045512.2                              | (1)     | -----                                                                          |       |       |       |       |       |       |       |
|                                                     |         | Section 735                                                                    |       |       |       |       |       |       |       |
| Autographa californica nucleopolyhedrovirus NC 0... | (56519) | 56519                                                                          | 56529 | 56540 | 56551 | 56562 | 56573 | 56584 | 56595 |
|                                                     | (56519) | GACGAATATAAAAAACATGAATCGCCAGTTGAACGAGGACATTTATAAACTCAAAGAAGAATAGAATCGACATTTGA  |       |       |       |       |       |       |       |
| SARS-CoV-2 NC_045512.2                              | (1)     | -----                                                                          |       |       |       |       |       |       |       |

## SARS-CoV-2 &amp; Autographa californica nucleopolyhedrovirus.apr

|                                                     |         |                                                                                |       |       |       |       |       |       |
|-----------------------------------------------------|---------|--------------------------------------------------------------------------------|-------|-------|-------|-------|-------|-------|
|                                                     |         | Section 736                                                                    |       |       |       |       |       |       |
| Autographa californica nucleopolyhedrovirus NC 0... | (56596) | 56596                                                                          | 56606 | 56617 | 56628 | 56639 | 56650 | 56661 |
|                                                     | (56596) | TAAAGATTACGTCGAAACCTTGAACGATAAAATTGAATCGTTGGAAAAGCAATTGGATGATAAACAAAATTTAAACC  |       |       |       |       |       |       |
|                                                     | (1)     | -----                                                                          |       |       |       |       |       |       |
|                                                     |         | Section 737                                                                    |       |       |       |       |       |       |
| Autographa californica nucleopolyhedrovirus NC 0... | (56673) | 56673                                                                          | 56683 | 56694 | 56705 | 56716 | 56727 | 56738 |
|                                                     | (56673) | GGGAAC TAAGAAGCAGCATTTC AAAAATAGACGAACTACACAGAGGTACAACTTGACGCCAAAGATATTATGGAA  |       |       |       |       |       |       |
|                                                     | (1)     | -----                                                                          |       |       |       |       |       |       |
|                                                     |         | Section 738                                                                    |       |       |       |       |       |       |
| Autographa californica nucleopolyhedrovirus NC 0... | (56750) | 56750                                                                          | 56760 | 56771 | 56782 | 56793 | 56804 | 56815 |
|                                                     | (56750) | CTCAAACAGTCGGTATCGATTAAAGATCAAGAAATTGCCATGAAAAACGCTCAATATTTAGATTGAGTGCTATATA   |       |       |       |       |       |       |
|                                                     | (1)     | -----                                                                          |       |       |       |       |       |       |
|                                                     |         | Section 739                                                                    |       |       |       |       |       |       |
| Autographa californica nucleopolyhedrovirus NC 0... | (56827) | 56827                                                                          | 56837 | 56848 | 56859 | 56870 | 56881 | 56892 |
|                                                     | (56827) | TCAACAACTGTAAATGAATTAAGTCAACTAAAAATGAATTGTCTCAAGTCGCGACAACCAATCAAAGTTTATTTG    |       |       |       |       |       |       |
|                                                     | (1)     | -----                                                                          |       |       |       |       |       |       |
|                                                     |         | Section 740                                                                    |       |       |       |       |       |       |
| Autographa californica nucleopolyhedrovirus NC 0... | (56904) | 56904                                                                          | 56914 | 56925 | 56936 | 56947 | 56958 | 56969 |
|                                                     | (56904) | CAGAAAATGAAGAATCTAAAGTGCTTTTAGAAGGCACGTTGGCGTTTATAGATAGCTTTTATCAAATAATTATGCAG  |       |       |       |       |       |       |
|                                                     | (1)     | -----                                                                          |       |       |       |       |       |       |
|                                                     |         | Section 741                                                                    |       |       |       |       |       |       |
| Autographa californica nucleopolyhedrovirus NC 0... | (56981) | 56981                                                                          | 56991 | 57002 | 57013 | 57024 | 57035 | 57046 |
|                                                     | (56981) | ATTGAAAAACCTGATTACGTGCCGATTTCTAAACCACAGCTTACAGCACAAAGAAAGTATATATCAAACGGATTATAT |       |       |       |       |       |       |
|                                                     | (1)     | -----                                                                          |       |       |       |       |       |       |
|                                                     |         | Section 742                                                                    |       |       |       |       |       |       |
| Autographa californica nucleopolyhedrovirus NC 0... | (57058) | 57058                                                                          | 57068 | 57079 | 57090 | 57101 | 57112 | 57123 |
|                                                     | (57058) | CAAAGATTGGTTGCAAAAATTGAGGTCTAAACTGTCAAACGCCGACGTTGCCAATTTGCAATCAGTTTCCGAATTGA  |       |       |       |       |       |       |
|                                                     | (1)     | -----                                                                          |       |       |       |       |       |       |

## SARS-CoV-2 &amp; Autographa californica nucleopolyhedrovirus.apr

|                                                     |         |                                                                               |       |       |       |       |       |       |       |
|-----------------------------------------------------|---------|-------------------------------------------------------------------------------|-------|-------|-------|-------|-------|-------|-------|
|                                                     |         | Section 743                                                                   |       |       |       |       |       |       |       |
| Autographa californica nucleopolyhedrovirus NC 0... | (57135) | 57135                                                                         | 57145 | 57156 | 57167 | 57178 | 57189 | 57200 | 57211 |
|                                                     | (57135) | GTGATTTAAAAAGTCAAATAATTTCTATTGTACCACGAAATATTGTAAATCGAATTTTAAAAGAAAATTATAAAGTA |       |       |       |       |       |       |       |
|                                                     | (1)     | -----                                                                         |       |       |       |       |       |       |       |
|                                                     |         | Section 744                                                                   |       |       |       |       |       |       |       |
| Autographa californica nucleopolyhedrovirus NC 0... | (57212) | 57212                                                                         | 57222 | 57233 | 57244 | 57255 | 57266 | 57277 | 57288 |
|                                                     | (57212) | AAAGTAGAAAATGTCAATGCAGAATTACTGGAAAGTGTGCTGTCACAAGTGCTGTAAGCGCTTTAGTACAGCAATA  |       |       |       |       |       |       |       |
|                                                     | (1)     | -----                                                                         |       |       |       |       |       |       |       |
|                                                     |         | Section 745                                                                   |       |       |       |       |       |       |       |
| Autographa californica nucleopolyhedrovirus NC 0... | (57289) | 57289                                                                         | 57299 | 57310 | 57321 | 57332 | 57343 | 57354 | 57365 |
|                                                     | (57289) | TGAACGATCAGAAAAGCAAAACGTTAAACTTAGACAAGAATTCGAAATAAAATTAAACGATTTACAAAGATTATTGG |       |       |       |       |       |       |       |
|                                                     | (1)     | -----                                                                         |       |       |       |       |       |       |       |
|                                                     |         | Section 746                                                                   |       |       |       |       |       |       |       |
| Autographa californica nucleopolyhedrovirus NC 0... | (57366) | 57366                                                                         | 57376 | 57387 | 57398 | 57409 | 57420 | 57431 | 57442 |
|                                                     | (57366) | AGCAAAATCAGACTGATTTTGAGTCAATATCAGAGTTTATCTCACGAGATCCGGCTTTCAACAGAAATTTAAATGAC |       |       |       |       |       |       |       |
|                                                     | (1)     | -----                                                                         |       |       |       |       |       |       |       |
|                                                     |         | Section 747                                                                   |       |       |       |       |       |       |       |
| Autographa californica nucleopolyhedrovirus NC 0... | (57443) | 57443                                                                         | 57453 | 57464 | 57475 | 57486 | 57497 | 57508 | 57519 |
|                                                     | (57443) | GAGCGATTCCAAAACCTTGAGGCAACAATACGACGAAATGTCTAGTAAATATTCAGCCTTGGAACGACTAAAATTAA |       |       |       |       |       |       |       |
|                                                     | (1)     | -----                                                                         |       |       |       |       |       |       |       |
|                                                     |         | Section 748                                                                   |       |       |       |       |       |       |       |
| Autographa californica nucleopolyhedrovirus NC 0... | (57520) | 57520                                                                         | 57530 | 57541 | 57552 | 57563 | 57574 | 57585 | 57596 |
|                                                     | (57520) | AGAGATGGAGTCTATTGCAGATCAGGCTGTCAAATCTGAAATGAGTAAATTAACACACAACCTAGATGAATTAACT  |       |       |       |       |       |       |       |
|                                                     | (1)     | -----                                                                         |       |       |       |       |       |       |       |
|                                                     |         | Section 749                                                                   |       |       |       |       |       |       |       |
| Autographa californica nucleopolyhedrovirus NC 0... | (57597) | 57597                                                                         | 57607 | 57618 | 57629 | 57640 | 57651 | 57662 | 57673 |
|                                                     | (57597) | CTTTATTTGTTAAATATAATCGTAAAGCTCAAGACATATTTGAGTGGAAAACCTAGCATGCTTAAAGGTACGAAACG |       |       |       |       |       |       |       |
|                                                     | (1)     | -----                                                                         |       |       |       |       |       |       |       |

## SARS-CoV-2 &amp; Autographa californica nucleopolyhedrovirus.apr

|                                                     |         |                                                                                |       |       |       |       |       |       |       |
|-----------------------------------------------------|---------|--------------------------------------------------------------------------------|-------|-------|-------|-------|-------|-------|-------|
|                                                     |         | Section 750                                                                    |       |       |       |       |       |       |       |
| Autographa californica nucleopolyhedrovirus NC 0... | (57674) | 57674                                                                          | 57684 | 57695 | 57706 | 57717 | 57728 | 57739 | 57750 |
|                                                     | (57674) | TTGGCGCGAACAACAGCGGCCAGCGTTCAACCAAACGTCGAATAGAATTACAAAAATTTATATTCATTTTCATCTTC  |       |       |       |       |       |       |       |
|                                                     | (1)     | -----                                                                          |       |       |       |       |       |       |       |
|                                                     |         | Section 751                                                                    |       |       |       |       |       |       |       |
| Autographa californica nucleopolyhedrovirus NC 0... | (57751) | 57751                                                                          | 57761 | 57772 | 57783 | 57794 | 57805 | 57816 | 57827 |
|                                                     | (57751) | GTCATACTTCAACAGTCCCAACACGTTTCATGTTGTGATTCTCGCCGTTCTCGACAGTTACGTAAATAGTTACTTTGA |       |       |       |       |       |       |       |
|                                                     | (1)     | -----                                                                          |       |       |       |       |       |       |       |
|                                                     |         | Section 752                                                                    |       |       |       |       |       |       |       |
| Autographa californica nucleopolyhedrovirus NC 0... | (57828) | 57828                                                                          | 57838 | 57849 | 57860 | 57871 | 57882 | 57893 | 57904 |
|                                                     | (57828) | TTAAATTATCTTCCAGCAGCATTGAGATTTGATTGAAATCCGCACATAGCTTTTGTAGCGAATCCGCTTCGGTTTTT  |       |       |       |       |       |       |       |
|                                                     | (1)     | -----                                                                          |       |       |       |       |       |       |       |
|                                                     |         | Section 753                                                                    |       |       |       |       |       |       |       |
| Autographa californica nucleopolyhedrovirus NC 0... | (57905) | 57905                                                                          | 57915 | 57926 | 57937 | 57948 | 57959 | 57970 | 57981 |
|                                                     | (57905) | TTATTTGTGTTGACGTAGAAAACAGATTTGTTCCATTTGCCCAAGTCGGAAGAGGTAGAACAGTCATCCGAATCGGC  |       |       |       |       |       |       |       |
|                                                     | (1)     | -----                                                                          |       |       |       |       |       |       |       |
|                                                     |         | Section 754                                                                    |       |       |       |       |       |       |       |
| Autographa californica nucleopolyhedrovirus NC 0... | (57982) | 57982                                                                          | 57992 | 58003 | 58014 | 58025 | 58036 | 58047 | 58058 |
|                                                     | (57982) | AATGTTCAACTCGTCGCTTTTAACTGCACAATAAACTTGTTATCGCCCATGTCATTTTCTTCCAATTTCGCTTTT    |       |       |       |       |       |       |       |
|                                                     | (1)     | -----                                                                          |       |       |       |       |       |       |       |
|                                                     |         | Section 755                                                                    |       |       |       |       |       |       |       |
| Autographa californica nucleopolyhedrovirus NC 0... | (58059) | 58059                                                                          | 58069 | 58080 | 58091 | 58102 | 58113 | 58124 | 58135 |
|                                                     | (58059) | ACACATTTACATTGTACGAAGCAACGTGTTTGTTCGATCGACTAATGTTGATCTTTGCGTTTGTGCAATTTTGCAA   |       |       |       |       |       |       |       |
|                                                     | (1)     | -----                                                                          |       |       |       |       |       |       |       |
|                                                     |         | Section 756                                                                    |       |       |       |       |       |       |       |
| Autographa californica nucleopolyhedrovirus NC 0... | (58136) | 58136                                                                          | 58146 | 58157 | 58168 | 58179 | 58190 | 58201 | 58212 |
|                                                     | (58136) | TTTGAATATGCTTCGCTTTCTTTAGCCTCGCACAATTCGATGCGCGTAGAGTTGACCACGTTCCAATTCATGTACAC  |       |       |       |       |       |       |       |
|                                                     | (1)     | -----                                                                          |       |       |       |       |       |       |       |

## SARS-CoV-2 &amp; Autographa californica nucleopolyhedrovirus.apr

|                                                     |         |                                                                               |       |       |       |       |       |       |       |
|-----------------------------------------------------|---------|-------------------------------------------------------------------------------|-------|-------|-------|-------|-------|-------|-------|
|                                                     |         | Section 757                                                                   |       |       |       |       |       |       |       |
| Autographa californica nucleopolyhedrovirus NC 0... | (58213) | 58213                                                                         | 58223 | 58234 | 58245 | 58256 | 58267 | 58278 | 58289 |
|                                                     | (58213) | GTTTGATCCATTAAAAATTTGTTGACACTTTATACTGTAAATGGTAAAGATTGGTTTTTCATTGTCTTTTAAATATT |       |       |       |       |       |       |       |
|                                                     | (1)     | -----                                                                         |       |       |       |       |       |       |       |
|                                                     |         | Section 758                                                                   |       |       |       |       |       |       |       |
| Autographa californica nucleopolyhedrovirus NC 0... | (58290) | 58290                                                                         | 58300 | 58311 | 58322 | 58333 | 58344 | 58355 | 58366 |
|                                                     | (58290) | TAAACACCTCATTGATGTCGTCAGACCCCTTTATATTGTTCTTGAATAGATTTATTAGTGTTCGCATTGACAGAA   |       |       |       |       |       |       |       |
|                                                     | (1)     | -----                                                                         |       |       |       |       |       |       |       |
|                                                     |         | Section 759                                                                   |       |       |       |       |       |       |       |
| Autographa californica nucleopolyhedrovirus NC 0... | (58367) | 58367                                                                         | 58377 | 58388 | 58399 | 58410 | 58421 | 58432 | 58443 |
|                                                     | (58367) | CATTCCACTTGAACCACGTCGGGATCGTCGTTGAGATTTTTGTACACAACCTCAAAAACAACTTTGTACAAACCGCT |       |       |       |       |       |       |       |
|                                                     | (1)     | -----                                                                         |       |       |       |       |       |       |       |
|                                                     |         | Section 760                                                                   |       |       |       |       |       |       |       |
| Autographa californica nucleopolyhedrovirus NC 0... | (58444) | 58444                                                                         | 58454 | 58465 | 58476 | 58487 | 58498 | 58509 | 58520 |
|                                                     | (58444) | GTTGATTTTCTTGTAGATAAATTTGTACTTTACAATAATATTGACGCCATCTTCATTTTCAAATGTTTGTAGTCA   |       |       |       |       |       |       |       |
|                                                     | (1)     | -----                                                                         |       |       |       |       |       |       |       |
|                                                     |         | Section 761                                                                   |       |       |       |       |       |       |       |
| Autographa californica nucleopolyhedrovirus NC 0... | (58521) | 58521                                                                         | 58531 | 58542 | 58553 | 58564 | 58575 | 58586 | 58597 |
|                                                     | (58521) | AATAGTCGCTCATGGGGTTGCAGTTTCAATTTCCATTTACATTCTTTGTATTGCTTGATCTGAATCATTGACTA    |       |       |       |       |       |       |       |
|                                                     | (1)     | -----                                                                         |       |       |       |       |       |       |       |
|                                                     |         | Section 762                                                                   |       |       |       |       |       |       |       |
| Autographa californica nucleopolyhedrovirus NC 0... | (58598) | 58598                                                                         | 58608 | 58619 | 58630 | 58641 | 58652 | 58663 | 58674 |
|                                                     | (58598) | AACTTTGTTTTACATAATTTAACTAATGTCATAGCACTTGCCTTCTTCATGTCTTTGAAAGATTGCGAATCGCC    |       |       |       |       |       |       |       |
|                                                     | (1)     | -----                                                                         |       |       |       |       |       |       |       |
|                                                     |         | Section 763                                                                   |       |       |       |       |       |       |       |
| Autographa californica nucleopolyhedrovirus NC 0... | (58675) | 58675                                                                         | 58685 | 58696 | 58707 | 58718 | 58729 | 58740 | 58751 |
|                                                     | (58675) | GTAGTATTCTTGAATTTTGTGTCGGACATTATTCGAAAAGTGTAATGGTATTATTATCGATACTCAACGTCATTT   |       |       |       |       |       |       |       |
|                                                     | (1)     | -----                                                                         |       |       |       |       |       |       |       |

## SARS-CoV-2 &amp; Autographa californica nucleopolyhedrovirus.apr

|                                                     |         |                                                                                 |       |       |       |       |       |       |       |
|-----------------------------------------------------|---------|---------------------------------------------------------------------------------|-------|-------|-------|-------|-------|-------|-------|
|                                                     |         | Section 764                                                                     |       |       |       |       |       |       |       |
| Autographa californica nucleopolyhedrovirus NC 0... | (58752) | 58752                                                                           | 58762 | 58773 | 58784 | 58795 | 58806 | 58817 | 58828 |
|                                                     | (58752) | TGCTCATCAATTTACCACCTAATCCTTTTGTAAATTTTCTCTAATCTTCTTGGGGCTACTGGCCATAGCCATGCGTTTT |       |       |       |       |       |       |       |
|                                                     | (1)     | -----                                                                           |       |       |       |       |       |       |       |
|                                                     |         | Section 765                                                                     |       |       |       |       |       |       |       |
| Autographa californica nucleopolyhedrovirus NC 0... | (58829) | 58829                                                                           | 58839 | 58850 | 58861 | 58872 | 58883 | 58894 | 58905 |
|                                                     | (58829) | ATAAGCGGCTCACCCTACTTTCTCCAGACAAAGATCTTTTGGTCGCCATATTGCTGTTGTCGATATGTGGGAATCT    |       |       |       |       |       |       |       |
|                                                     | (1)     | -----                                                                           |       |       |       |       |       |       |       |
|                                                     |         | Section 766                                                                     |       |       |       |       |       |       |       |
| Autographa californica nucleopolyhedrovirus NC 0... | (58906) | 58906                                                                           | 58916 | 58927 | 58938 | 58949 | 58960 | 58971 | 58982 |
|                                                     | (58906) | ATCCGATGGCAAATACTGAATGGCGACGAAATCGAAGTGTCGCCAGAGCACCGTTTCGTTAGCGTGGAGGGAGTTGAT  |       |       |       |       |       |       |       |
|                                                     | (1)     | -----                                                                           |       |       |       |       |       |       |       |
|                                                     |         | Section 767                                                                     |       |       |       |       |       |       |       |
| Autographa californica nucleopolyhedrovirus NC 0... | (58983) | 58983                                                                           | 58993 | 59004 | 59015 | 59026 | 59037 | 59048 | 59059 |
|                                                     | (58983) | TATAAACGTGGCCAGCAACACGCCGCTCGACAACACGTTTCAAGACAATGTTTCAAAAAGCCGATTTTGAAAATTTTCG |       |       |       |       |       |       |       |
|                                                     | (1)     | -----                                                                           |       |       |       |       |       |       |       |
|                                                     |         | Section 768                                                                     |       |       |       |       |       |       |       |
| Autographa californica nucleopolyhedrovirus NC 0... | (59060) | 59060                                                                           | 59070 | 59081 | 59092 | 59103 | 59114 | 59125 | 59136 |
|                                                     | (59060) | ACTACAACACGCCGATTGTGTACAATTTAAAAACAAAACTTTAACAATGTACAACGAGAGAATAAGAGCGGCTCTG    |       |       |       |       |       |       |       |
|                                                     | (1)     | -----                                                                           |       |       |       |       |       |       |       |
|                                                     |         | Section 769                                                                     |       |       |       |       |       |       |       |
| Autographa californica nucleopolyhedrovirus NC 0... | (59137) | 59137                                                                           | 59147 | 59158 | 59169 | 59180 | 59191 | 59202 | 59213 |
|                                                     | (59137) | AACAGACCCGTCCGATTTAACGATCAACGGTCAATGTTAATATTGCGTACGTATTTTTGTTCTTTATTTGTATAGT    |       |       |       |       |       |       |       |
|                                                     | (1)     | -----                                                                           |       |       |       |       |       |       |       |
|                                                     |         | Section 770                                                                     |       |       |       |       |       |       |       |
| Autographa californica nucleopolyhedrovirus NC 0... | (59214) | 59214                                                                           | 59224 | 59235 | 59246 | 59257 | 59268 | 59279 | 59290 |
|                                                     | (59214) | TTTGCTGAGCGTGTGGCCGCTTTTTTCGACACAAACATTGCGACCGACACGAAGAGTAAAAATGTTGCAGCAAAAA    |       |       |       |       |       |       |       |
|                                                     | (1)     | -----                                                                           |       |       |       |       |       |       |       |

## SARS-CoV-2 &amp; Autographa californica nucleopolyhedrovirus.apr

|                                                     |         |                                                                                |       |       |       |       |       |       |       |
|-----------------------------------------------------|---------|--------------------------------------------------------------------------------|-------|-------|-------|-------|-------|-------|-------|
|                                                     |         | Section 771                                                                    |       |       |       |       |       |       |       |
| Autographa californica nucleopolyhedrovirus NC 0... | (59291) | 59291                                                                          | 59301 | 59312 | 59323 | 59334 | 59345 | 59356 | 59367 |
|                                                     | (59291) | TTAAATAAACTCAAAGATGGTTTGAACACGTTTCAGCAGCAAGTCGGTGGTTTGCGCTCGCTCAAAATTATTTGACAA |       |       |       |       |       |       |       |
| SARS-CoV-2 NC_045512.2                              | (1)     | -----                                                                          |       |       |       |       |       |       |       |
|                                                     |         | Section 772                                                                    |       |       |       |       |       |       |       |
| Autographa californica nucleopolyhedrovirus NC 0... | (59368) | 59368                                                                          | 59378 | 59389 | 59400 | 59411 | 59422 | 59433 | 59444 |
|                                                     | (59368) | ACGCCCAACGCGCAGACCTAGATGTTGGCGAAAACATATCAGAGATCGACAAAAAGTTTCACGTTTGCCGACACGTTG |       |       |       |       |       |       |       |
| SARS-CoV-2 NC_045512.2                              | (1)     | -----                                                                          |       |       |       |       |       |       |       |
|                                                     |         | Section 773                                                                    |       |       |       |       |       |       |       |
| Autographa californica nucleopolyhedrovirus NC 0... | (59445) | 59445                                                                          | 59455 | 59466 | 59477 | 59488 | 59499 | 59510 | 59521 |
|                                                     | (59445) | ACACGTTTTTTGGATTTGTGCGGCGGACCGGGCGAGTTTGCCAACTATACCATGTCGTTGAACCCGCTTTGCAAAGCG |       |       |       |       |       |       |       |
| SARS-CoV-2 NC_045512.2                              | (1)     | -----                                                                          |       |       |       |       |       |       |       |
|                                                     |         | Section 774                                                                    |       |       |       |       |       |       |       |
| Autographa californica nucleopolyhedrovirus NC 0... | (59522) | 59522                                                                          | 59532 | 59543 | 59554 | 59565 | 59576 | 59587 | 59598 |
|                                                     | (59522) | TATGGCGTCACGTTGACAAACAACTCGGTGTGCGTGACAAACCGACAGTGCGCAAACGCAAAAATTTACAACCAT    |       |       |       |       |       |       |       |
| SARS-CoV-2 NC_045512.2                              | (1)     | -----                                                                          |       |       |       |       |       |       |       |
|                                                     |         | Section 775                                                                    |       |       |       |       |       |       |       |
| Autographa californica nucleopolyhedrovirus NC 0... | (59599) | 59599                                                                          | 59609 | 59620 | 59631 | 59642 | 59653 | 59664 | 59675 |
|                                                     | (59599) | TACGGGGCCCCGACAAGTCAGGCGACGTGTTTGATAAAAATGTTGTATTTGAGATTAGCATCAAGTGTGGCAACGCGT |       |       |       |       |       |       |       |
| SARS-CoV-2 NC_045512.2                              | (1)     | -----                                                                          |       |       |       |       |       |       |       |
|                                                     |         | Section 776                                                                    |       |       |       |       |       |       |       |
| Autographa californica nucleopolyhedrovirus NC 0... | (59676) | 59676                                                                          | 59686 | 59697 | 59708 | 59719 | 59730 | 59741 | 59752 |
|                                                     | (59676) | GCGATCTGGTGTGGCAGATGGCTCGGTTGACGTTAATGGACGCGAAAACGAACAAGAACGTCTCAACTTTGATTTG   |       |       |       |       |       |       |       |
| SARS-CoV-2 NC_045512.2                              | (1)     | -----                                                                          |       |       |       |       |       |       |       |
|                                                     |         | Section 777                                                                    |       |       |       |       |       |       |       |
| Autographa californica nucleopolyhedrovirus NC 0... | (59753) | 59753                                                                          | 59763 | 59774 | 59785 | 59796 | 59807 | 59818 | 59829 |
|                                                     | (59753) | ATCATGTGCGAGACGCAGCTAATTTTAATTTGCCTGCGTCCCGGCGGCAATTGCGTTTTAAAGTTTTTCGACGCGTT  |       |       |       |       |       |       |       |
| SARS-CoV-2 NC_045512.2                              | (1)     | -----                                                                          |       |       |       |       |       |       |       |

## SARS-CoV-2 &amp; Autographa californica nucleopolyhedrovirus.apr

|                                                     |         |                                                                                 |       |       |       |       |       |       |       |
|-----------------------------------------------------|---------|---------------------------------------------------------------------------------|-------|-------|-------|-------|-------|-------|-------|
|                                                     |         | Section 778                                                                     |       |       |       |       |       |       |       |
| Autographa californica nucleopolyhedrovirus NC 0... | (59830) | 59830                                                                           | 59840 | 59851 | 59862 | 59873 | 59884 | 59895 | 59906 |
|                                                     | (59830) | TGAACACGAAACGATCCAAATGCTAAACAAGTTTGTTAACCATTTCGAAAAATGGGTTTTATACAAACCGCCTTCTT   |       |       |       |       |       |       |       |
| SARS-CoV-2 NC_045512.2                              | (1)     | -----                                                                           |       |       |       |       |       |       |       |
|                                                     |         | Section 779                                                                     |       |       |       |       |       |       |       |
| Autographa californica nucleopolyhedrovirus NC 0... | (59907) | 59907                                                                           | 59917 | 59928 | 59939 | 59950 | 59961 | 59972 | 59983 |
|                                                     | (59907) | CTCGGCCTGCCAATTCGGAACGCTATTTAATTTGTTTCAATAAATTAGTTAGACCGTATTGTAACAATTATGTCAAC   |       |       |       |       |       |       |       |
| SARS-CoV-2 NC_045512.2                              | (1)     | -----                                                                           |       |       |       |       |       |       |       |
|                                                     |         | Section 780                                                                     |       |       |       |       |       |       |       |
| Autographa californica nucleopolyhedrovirus NC 0... | (59984) | 59984                                                                           | 59994 | 60005 | 60016 | 60027 | 60038 | 60049 | 60060 |
|                                                     | (59984) | GAGTTGGAAAAACAGTTTGAAAAATATTATCGCATACAATTAAAAAACTTAAACAAGTTGATAAACTTGTTGAAAAAT  |       |       |       |       |       |       |       |
| SARS-CoV-2 NC_045512.2                              | (1)     | -----                                                                           |       |       |       |       |       |       |       |
|                                                     |         | Section 781                                                                     |       |       |       |       |       |       |       |
| Autographa californica nucleopolyhedrovirus NC 0... | (60061) | 60061                                                                           | 60071 | 60082 | 60093 | 60104 | 60115 | 60126 | 60137 |
|                                                     | (60061) | ATAACGTGTGTATAAAAAGCCAGCGGCTTCAAATCAGGCATCATTTCAACATGGATTTCGCTAGCCAATTTGTGCTTGA |       |       |       |       |       |       |       |
| SARS-CoV-2 NC_045512.2                              | (1)     | -----                                                                           |       |       |       |       |       |       |       |
|                                                     |         | Section 782                                                                     |       |       |       |       |       |       |       |
| Autographa californica nucleopolyhedrovirus NC 0... | (60138) | 60138                                                                           | 60148 | 60159 | 60170 | 60181 | 60192 | 60203 | 60214 |
|                                                     | (60138) | AAACCCTGCCTTACAAGTTTGAGCCGCCTAAGTTTTTACGAACAAAATATTGCGACGCATGTCGCTACAGATTTTTA   |       |       |       |       |       |       |       |
| SARS-CoV-2 NC_045512.2                              | (1)     | -----                                                                           |       |       |       |       |       |       |       |
|                                                     |         | Section 783                                                                     |       |       |       |       |       |       |       |
| Autographa californica nucleopolyhedrovirus NC 0... | (60215) | 60215                                                                           | 60225 | 60236 | 60247 | 60258 | 60269 | 60280 | 60291 |
|                                                     | (60215) | CCAAAATTTTCTGATGAAAAATTTTGTGGACAATGCATATGCAACATATGCAACAATCCAAAAAATATAGATTGTCC   |       |       |       |       |       |       |       |
| SARS-CoV-2 NC_045512.2                              | (1)     | -----                                                                           |       |       |       |       |       |       |       |
|                                                     |         | Section 784                                                                     |       |       |       |       |       |       |       |
| Autographa californica nucleopolyhedrovirus NC 0... | (60292) | 60292                                                                           | 60302 | 60313 | 60324 | 60335 | 60346 | 60357 | 60368 |
|                                                     | (60292) | ATCATCATATATATCGAAAAATTAAACCGAAGAAAGAAAAACAAAGAAATATATATTACCAGCAACAAGTTTAATAAAA |       |       |       |       |       |       |       |
| SARS-CoV-2 NC_045512.2                              | (1)     | -----                                                                           |       |       |       |       |       |       |       |



## SARS-CoV-2 &amp; Autographa californica nucleopolyhedrovirus.apr

|                                                     |         |                                                                                |       |       |       |       |       |       |       |
|-----------------------------------------------------|---------|--------------------------------------------------------------------------------|-------|-------|-------|-------|-------|-------|-------|
| Section 785                                         |         |                                                                                |       |       |       |       |       |       |       |
| Autographa californica nucleopolyhedrovirus NC 0... | (60369) | 60369                                                                          | 60379 | 60390 | 60401 | 60412 | 60423 | 60434 | 60445 |
|                                                     | (60369) | CGTGCAAAAACGAATGTAATCAACAATCAAACCGGAGATGTTTAATTTCTATTTTACAAATGAAAGTTGTAAAGAG   |       |       |       |       |       |       |       |
|                                                     | (1)     | -----                                                                          |       |       |       |       |       |       |       |
| Section 786                                         |         |                                                                                |       |       |       |       |       |       |       |
| Autographa californica nucleopolyhedrovirus NC 0... | (60446) | 60446                                                                          | 60456 | 60467 | 60478 | 60489 | 60500 | 60511 | 60522 |
|                                                     | (60446) | CTCAATTGTTGTTGGTTTAATAAAAACTGTTACATGTGTTTGGAATATAAAAAAGAATTTATACAATGTAAATTTGTA |       |       |       |       |       |       |       |
|                                                     | (1)     | -----                                                                          |       |       |       |       |       |       |       |
| Section 787                                         |         |                                                                                |       |       |       |       |       |       |       |
| Autographa californica nucleopolyhedrovirus NC 0... | (60523) | 60523                                                                          | 60533 | 60544 | 60555 | 60566 | 60577 | 60588 | 60599 |
|                                                     | (60523) | TACGATTGATGGTCATTGTCCTTCGTTTAAAGCCGTTTGTTTTTCATGTATAAAAAAGAATCAAACGTGCCAAGTTT  |       |       |       |       |       |       |       |
|                                                     | (1)     | -----                                                                          |       |       |       |       |       |       |       |
| Section 788                                         |         |                                                                                |       |       |       |       |       |       |       |
| Autographa californica nucleopolyhedrovirus NC 0... | (60600) | 60600                                                                          | 60610 | 60621 | 60632 | 60643 | 60654 | 60665 | 60676 |
|                                                     | (60600) | GCAATCAACCTTTATTGAAAATGTACAAAGAGAAGCAAGAAGAGCGTTTGAAGATGCAGTCGCTGTACGCAACGTTG  |       |       |       |       |       |       |       |
|                                                     | (1)     | -----                                                                          |       |       |       |       |       |       |       |
| Section 789                                         |         |                                                                                |       |       |       |       |       |       |       |
| Autographa californica nucleopolyhedrovirus NC 0... | (60677) | 60677                                                                          | 60687 | 60698 | 60709 | 60720 | 60731 | 60742 | 60753 |
|                                                     | (60677) | GCCGATGTAGATTTAAAAATATTAGACATTTACGATGTCGACAATTATTCTAGAAAAATGATATTGTGTGCTCAATG  |       |       |       |       |       |       |       |
|                                                     | (1)     | -----                                                                          |       |       |       |       |       |       |       |
| Section 790                                         |         |                                                                                |       |       |       |       |       |       |       |
| Autographa californica nucleopolyhedrovirus NC 0... | (60754) | 60754                                                                          | 60764 | 60775 | 60786 | 60797 | 60808 | 60819 | 60830 |
|                                                     | (60754) | TCATATATTTGCACGCTGTTTTTGTACCAATACCATGCAATGTTTTTGTCCTCGACAGGGTTATAAGTGTGAATGTA  |       |       |       |       |       |       |       |
|                                                     | (1)     | -----                                                                          |       |       |       |       |       |       |       |
| Section 791                                         |         |                                                                                |       |       |       |       |       |       |       |
| Autographa californica nucleopolyhedrovirus NC 0... | (60831) | 60831                                                                          | 60841 | 60852 | 60863 | 60874 | 60885 | 60896 | 60907 |
|                                                     | (60831) | TATGCCGACGATCTAAATATTTTAAAAATAATGTATTGTGTGTTAAAGTAAAGCGGCTTGTTTTAATAAAATGAAA   |       |       |       |       |       |       |       |
|                                                     | (1)     | -----                                                                          |       |       |       |       |       |       |       |

## SARS-CoV-2 &amp; Autographa californica nucleopolyhedrovirus.apr

|                                                     |         |                                                                               |       |       |       |       |       |       |       |
|-----------------------------------------------------|---------|-------------------------------------------------------------------------------|-------|-------|-------|-------|-------|-------|-------|
|                                                     |         | Section 792                                                                   |       |       |       |       |       |       |       |
| Autographa californica nucleopolyhedrovirus NC 0... | (60908) | 60908                                                                         | 60918 | 60929 | 60940 | 60951 | 60962 | 60973 | 60984 |
|                                                     | (60908) | ATAAAACGTGTTCCAAAATGGAAGCATAGTGTAGATTATACTTTCAAAAGTATATACAAGTTAATAAATGTTTAATT |       |       |       |       |       |       |       |
|                                                     | (1)     | -----                                                                         |       |       |       |       |       |       |       |
|                                                     |         | Section 793                                                                   |       |       |       |       |       |       |       |
| Autographa californica nucleopolyhedrovirus NC 0... | (60985) | 60985                                                                         | 60995 | 61006 | 61017 | 61028 | 61039 | 61050 | 61061 |
|                                                     | (60985) | TTAAGGATATTGTTATGGAATAAACTATAAAATGAATTTGATGCAATTTAATTTTTTGATACTTTCCACAGACGGTA |       |       |       |       |       |       |       |
|                                                     | (1)     | -----                                                                         |       |       |       |       |       |       |       |
|                                                     |         | Section 794                                                                   |       |       |       |       |       |       |       |
| Autographa californica nucleopolyhedrovirus NC 0... | (61062) | 61062                                                                         | 61072 | 61083 | 61094 | 61105 | 61116 | 61127 | 61138 |
|                                                     | (61062) | GATTCAGAACGATGGCAAACATGTCGCTAGACAATGAGTACAACTTGAATTGGCCAAAACGGGGCTGTTTTCTCAC  |       |       |       |       |       |       |       |
|                                                     | (1)     | -----                                                                         |       |       |       |       |       |       |       |
|                                                     |         | Section 795                                                                   |       |       |       |       |       |       |       |
| Autographa californica nucleopolyhedrovirus NC 0... | (61139) | 61139                                                                         | 61149 | 61160 | 61171 | 61182 | 61193 | 61204 | 61215 |
|                                                     | (61139) | AATAACCTGATTAAATGTATAGGCTGTCGCACGATTTTGGACAAGATTAACGCCAAGCAAATTAACGACACACGTA  |       |       |       |       |       |       |       |
|                                                     | (1)     | -----                                                                         |       |       |       |       |       |       |       |
|                                                     |         | Section 796                                                                   |       |       |       |       |       |       |       |
| Autographa californica nucleopolyhedrovirus NC 0... | (61216) | 61216                                                                         | 61226 | 61237 | 61248 | 61259 | 61270 | 61281 | 61292 |
|                                                     | (61216) | TTCGAATTATTGCATATCGTCAACCAACGCGTTGATGTTCAATGAATCGATGAGAAAAAATCATTTACGAGTTT    |       |       |       |       |       |       |       |
|                                                     | (1)     | -----                                                                         |       |       |       |       |       |       |       |
|                                                     |         | Section 797                                                                   |       |       |       |       |       |       |       |
| Autographa californica nucleopolyhedrovirus NC 0... | (61293) | 61293                                                                         | 61303 | 61314 | 61325 | 61336 | 61347 | 61358 | 61369 |
|                                                     | (61293) | AAAGCTCTCGGCGTCAGTTTGCATCACAAATCCGTGGTCGTTGACATGTTGGCTCGTCGCGCTTCTATTATTTTGGC |       |       |       |       |       |       |       |
|                                                     | (1)     | -----                                                                         |       |       |       |       |       |       |       |
|                                                     |         | Section 798                                                                   |       |       |       |       |       |       |       |
| Autographa californica nucleopolyhedrovirus NC 0... | (61370) | 61370                                                                         | 61380 | 61391 | 61402 | 61413 | 61424 | 61435 | 61446 |
|                                                     | (61370) | AAAGCCGGCCATTTGCGTTGTTCCGGATGCCATATAGTTTTTAAATATAAAAGCGTAGACGACGCCCAACGCCGGCA |       |       |       |       |       |       |       |
|                                                     | (1)     | -----                                                                         |       |       |       |       |       |       |       |

## SARS-CoV-2 &amp; Autographa californica nucleopolyhedrovirus.apr

|                                                     |         |                                                                                |       |       |       |       |       |       |       |
|-----------------------------------------------------|---------|--------------------------------------------------------------------------------|-------|-------|-------|-------|-------|-------|-------|
|                                                     |         | Section 799                                                                    |       |       |       |       |       |       |       |
| Autographa californica nucleopolyhedrovirus NC 0... | (61447) | 61447                                                                          | 61457 | 61468 | 61479 | 61490 | 61501 | 61512 | 61523 |
|                                                     | (61447) | CAAACAAAATTGCAAGTTTCTCAACGCAATAGAAGACTATTCCGTCAATGAACAATTTGGCAAACCTCGATGTTGCGG |       |       |       |       |       |       |       |
|                                                     | (1)     | -----                                                                          |       |       |       |       |       |       |       |
|                                                     |         | Section 800                                                                    |       |       |       |       |       |       |       |
| Autographa californica nucleopolyhedrovirus NC 0... | (61524) | 61524                                                                          | 61534 | 61545 | 61556 | 61567 | 61578 | 61589 | 61600 |
|                                                     | (61524) | AAAAAGAAATACTGGCTGCCGATTTGATTCTCCGCGGCTAAGCGTTAAACCTTCGGCGCCGCCCGCCGAACCGCTA   |       |       |       |       |       |       |       |
|                                                     | (1)     | -----                                                                          |       |       |       |       |       |       |       |
|                                                     |         | Section 801                                                                    |       |       |       |       |       |       |       |
| Autographa californica nucleopolyhedrovirus NC 0... | (61601) | 61601                                                                          | 61611 | 61622 | 61633 | 61644 | 61655 | 61666 | 61677 |
|                                                     | (61601) | ACTCAACAGGTCTCCGAATGCAAAGTTTGTGTTTGATAGAGAAAAATCGGTGTGTTTCATGCCGTGCCGTACCTGGC  |       |       |       |       |       |       |       |
|                                                     | (1)     | -----                                                                          |       |       |       |       |       |       |       |
|                                                     |         | Section 802                                                                    |       |       |       |       |       |       |       |
| Autographa californica nucleopolyhedrovirus NC 0... | (61678) | 61678                                                                          | 61688 | 61699 | 61710 | 61721 | 61732 | 61743 | 61754 |
|                                                     | (61678) | TGTGTGCACGGAATGTTTCGCGTCGGTGCAAGCGTTGTTGTGTGTGCAACGCAAAAATTATGCAGCGCATCGAAACAT |       |       |       |       |       |       |       |
|                                                     | (1)     | -----                                                                          |       |       |       |       |       |       |       |
|                                                     |         | Section 803                                                                    |       |       |       |       |       |       |       |
| Autographa californica nucleopolyhedrovirus NC 0... | (61755) | 61755                                                                          | 61765 | 61776 | 61787 | 61798 | 61809 | 61820 | 61831 |
|                                                     | (61755) | TACCTCAGTAAACATTGCAAACGACTACGACATTCTTTAAAAATAAGCTATATATAAATATTGCATTGTATGACAAA  |       |       |       |       |       |       |       |
|                                                     | (1)     | -----                                                                          |       |       |       |       |       |       |       |
|                                                     |         | Section 804                                                                    |       |       |       |       |       |       |       |
| Autographa californica nucleopolyhedrovirus NC 0... | (61832) | 61832                                                                          | 61842 | 61853 | 61864 | 61875 | 61886 | 61897 | 61908 |
|                                                     | (61832) | AAAATTATTAACTTACTGCAAAGTAAACTTGTAAGGCTTTTCAAAAAAATTTGCGAGTTTATTTTGTGCTGCG      |       |       |       |       |       |       |       |
|                                                     | (1)     | -----                                                                          |       |       |       |       |       |       |       |
|                                                     |         | Section 805                                                                    |       |       |       |       |       |       |       |
| Autographa californica nucleopolyhedrovirus NC 0... | (61909) | 61909                                                                          | 61919 | 61930 | 61941 | 61952 | 61963 | 61974 | 61985 |
|                                                     | (61909) | TCGTGTCGCATCTAAGCGACGAAGACGACAGCGACGGTGATCGCTATTATCAGTATAATAACAATTGTAATTTTATA  |       |       |       |       |       |       |       |
|                                                     | (1)     | -----                                                                          |       |       |       |       |       |       |       |

## SARS-CoV-2 &amp; Autographa californica nucleopolyhedrovirus.apr

|                                                     |         |                                                                                 |       |       |       |       |       |       |       |
|-----------------------------------------------------|---------|---------------------------------------------------------------------------------|-------|-------|-------|-------|-------|-------|-------|
|                                                     |         | Section 806                                                                     |       |       |       |       |       |       |       |
| Autographa californica nucleopolyhedrovirus NC 0... | (61986) | 61986                                                                           | 61996 | 62007 | 62018 | 62029 | 62040 | 62051 | 62062 |
|                                                     | (61986) | TACATAAAATATTGTAAAATAAAAGACATATTATTGTACATAATGTTTTATTGTAATTAAATTAATACACCAATTTAA  |       |       |       |       |       |       |       |
|                                                     | (1)     | -----                                                                           |       |       |       |       |       |       |       |
|                                                     |         | Section 807                                                                     |       |       |       |       |       |       |       |
| Autographa californica nucleopolyhedrovirus NC 0... | (62063) | 62063                                                                           | 62073 | 62084 | 62095 | 62106 | 62117 | 62128 | 62139 |
|                                                     | (62063) | ACACATGTTGATGTTGTTGTGAATAATTTTAAATTTTACTTTTTTCGTCAAACACTATGGCGTTGCTTTCGATTA     |       |       |       |       |       |       |       |
|                                                     | (1)     | -----                                                                           |       |       |       |       |       |       |       |
|                                                     |         | Section 808                                                                     |       |       |       |       |       |       |       |
| Autographa californica nucleopolyhedrovirus NC 0... | (62140) | 62140                                                                           | 62150 | 62161 | 62172 | 62183 | 62194 | 62205 | 62216 |
|                                                     | (62140) | GTTTTTTCGTTAGCATTTTCATCTAAAAAATCAAACGTGTTGCCCGGCGCGTTTAGGGATTCTATGGTGTAGTCGGGC  |       |       |       |       |       |       |       |
|                                                     | (1)     | -----                                                                           |       |       |       |       |       |       |       |
|                                                     |         | Section 809                                                                     |       |       |       |       |       |       |       |
| Autographa californica nucleopolyhedrovirus NC 0... | (62217) | 62217                                                                           | 62227 | 62238 | 62249 | 62260 | 62271 | 62282 | 62293 |
|                                                     | (62217) | GTGTCGCTGTTTAGATATTGGTCCACTTCGCGCATTATGTCCAAGACGTTGTTCTGCAAATGAATGAGCTTTGTCAC   |       |       |       |       |       |       |       |
|                                                     | (1)     | -----                                                                           |       |       |       |       |       |       |       |
|                                                     |         | Section 810                                                                     |       |       |       |       |       |       |       |
| Autographa californica nucleopolyhedrovirus NC 0... | (62294) | 62294                                                                           | 62304 | 62315 | 62326 | 62337 | 62348 | 62359 | 62370 |
|                                                     | (62294) | CACGTCCACGGACGTGTTTCATGTTTCTTTTTGAAAACATAAATTGCAACAATTGTACGTGTCCACTATACAATTTCGG |       |       |       |       |       |       |       |
|                                                     | (1)     | -----                                                                           |       |       |       |       |       |       |       |
|                                                     |         | Section 811                                                                     |       |       |       |       |       |       |       |
| Autographa californica nucleopolyhedrovirus NC 0... | (62371) | 62371                                                                           | 62381 | 62392 | 62403 | 62414 | 62425 | 62436 | 62447 |
|                                                     | (62371) | CTTAATATACTCGTCGGCGCAATCGTATTTGCAATCCAATTCGTGTTCAACAAATTGGTGATGATATCTTTGAACG    |       |       |       |       |       |       |       |
|                                                     | (1)     | -----                                                                           |       |       |       |       |       |       |       |
|                                                     |         | Section 812                                                                     |       |       |       |       |       |       |       |
| Autographa californica nucleopolyhedrovirus NC 0... | (62448) | 62448                                                                           | 62458 | 62469 | 62480 | 62491 | 62502 | 62513 | 62524 |
|                                                     | (62448) | TGCACGTTTTCAATTTGTCCTTATCGGCCAACGCAAGTTTCAATTCGCTCTGTAAAGTTTCTAAAATTTTGTCTTTA   |       |       |       |       |       |       |       |
|                                                     | (1)     | -----                                                                           |       |       |       |       |       |       |       |

## SARS-CoV-2 &amp; Autographa californica nucleopolyhedrovirus.apr

|                                                                                   |         |                                                                                 |       |       |       |       |       |       |
|-----------------------------------------------------------------------------------|---------|---------------------------------------------------------------------------------|-------|-------|-------|-------|-------|-------|
| Section 813                                                                       |         |                                                                                 |       |       |       |       |       |       |
| Autographa californica nucleopolyhedrovirus NC 045512.2<br>SARS-CoV-2 NC_045512.2 | (62525) | 62525                                                                           | 62535 | 62546 | 62557 | 62568 | 62579 | 62590 |
|                                                                                   | (62525) | TTGTTGTCAAATTCGTGCGTGTTGCGTTCCAACCACAATTTGAACGGCTCGTCGACAAAAATGCTGCGCAACACCTC   |       |       |       |       |       |       |
|                                                                                   | (1)     | -----                                                                           |       |       |       |       |       |       |
| Section 814                                                                       |         |                                                                                 |       |       |       |       |       |       |
| Autographa californica nucleopolyhedrovirus NC 045512.2<br>SARS-CoV-2 NC_045512.2 | (62602) | 62602                                                                           | 62612 | 62623 | 62634 | 62645 | 62656 | 62667 |
|                                                                                   | (62602) | GTACAACGTCTGCCTAACGTGTACACTTGCTCGTATTCTTTTCATGCTGACCTCTTTGCTAACGTACATTACTAAAA   |       |       |       |       |       |       |
|                                                                                   | (1)     | -----                                                                           |       |       |       |       |       |       |
| Section 815                                                                       |         |                                                                                 |       |       |       |       |       |       |
| Autographa californica nucleopolyhedrovirus NC 045512.2<br>SARS-CoV-2 NC_045512.2 | (62679) | 62679                                                                           | 62689 | 62700 | 62711 | 62722 | 62733 | 62744 |
|                                                                                   | (62679) | AATCTACAAGTATTTTCAAACATTTGTAATAGGCGACGTATTTTGATTTAAGTTTTAAACCGTCCACCGTGTATTTCG  |       |       |       |       |       |       |
|                                                                                   | (1)     | -----                                                                           |       |       |       |       |       |       |
| Section 816                                                                       |         |                                                                                 |       |       |       |       |       |       |
| Autographa californica nucleopolyhedrovirus NC 045512.2<br>SARS-CoV-2 NC_045512.2 | (62756) | 62756                                                                           | 62766 | 62777 | 62788 | 62799 | 62810 | 62821 |
|                                                                                   | (62756) | TCCACGTTTCGCATCGACCACTTTTCGATTATTATCGCCGCTTGTTGCCGGCGCGTCGGCCTGTTTCGGTTTTAACTAT |       |       |       |       |       |       |
|                                                                                   | (1)     | -----                                                                           |       |       |       |       |       |       |
| Section 817                                                                       |         |                                                                                 |       |       |       |       |       |       |
| Autographa californica nucleopolyhedrovirus NC 045512.2<br>SARS-CoV-2 NC_045512.2 | (62833) | 62833                                                                           | 62843 | 62854 | 62865 | 62876 | 62887 | 62898 |
|                                                                                   | (62833) | ATCCGGTTCAATATTTAAAGTTTCAAAAGATTTAATGGCATTCATAAAATCATCTTTTGTCTTTGGCGTGGTCAATG   |       |       |       |       |       |       |
|                                                                                   | (1)     | -----                                                                           |       |       |       |       |       |       |
| Section 818                                                                       |         |                                                                                 |       |       |       |       |       |       |
| Autographa californica nucleopolyhedrovirus NC 045512.2<br>SARS-CoV-2 NC_045512.2 | (62910) | 62910                                                                           | 62920 | 62931 | 62942 | 62953 | 62964 | 62975 |
|                                                                                   | (62910) | GTAAATCTATCGAGGAGTTGTCGTCCGTGTGCTCTTCGGGCACGCTGTTTCAGACGTAACGTAATCTTTTGGGATCG   |       |       |       |       |       |       |
|                                                                                   | (1)     | -----                                                                           |       |       |       |       |       |       |
| Section 819                                                                       |         |                                                                                 |       |       |       |       |       |       |
| Autographa californica nucleopolyhedrovirus NC 045512.2<br>SARS-CoV-2 NC_045512.2 | (62987) | 62987                                                                           | 62997 | 63008 | 63019 | 63030 | 63041 | 63052 |
|                                                                                   | (62987) | TCTTCATCGGGTATCAAATCGGCTTTAATTTTATTAGAATTGAGCAACGACATGGTGGTCGCTTGTAATTTAATAA    |       |       |       |       |       |       |
|                                                                                   | (1)     | -----                                                                           |       |       |       |       |       |       |

|                                                     |         |                                                                                 |       |       |       |       |       |       |       |
|-----------------------------------------------------|---------|---------------------------------------------------------------------------------|-------|-------|-------|-------|-------|-------|-------|
|                                                     |         | Section 820                                                                     |       |       |       |       |       |       |       |
| Autographa californica nucleopolyhedrovirus NC 0... | (63064) | 63064                                                                           | 63074 | 63085 | 63096 | 63107 | 63118 | 63129 | 63140 |
|                                                     | (63064) | ATTAATTAAAGACTGAAATTGTATATTGCACAAATTTATTTTCATTTTATTGATCTTACTATTAATACGCTGGCAG    |       |       |       |       |       |       |       |
|                                                     | (1)     | -----                                                                           |       |       |       |       |       |       |       |
|                                                     |         | Section 821                                                                     |       |       |       |       |       |       |       |
| Autographa californica nucleopolyhedrovirus NC 0... | (63141) | 63141                                                                           | 63151 | 63162 | 63173 | 63184 | 63195 | 63206 | 63217 |
|                                                     | (63141) | TTGGTATGCTTCATCCATTTTTGTGACTAGAAAATTTGCTAAAAAACTGAGCTCGTCCTGTGTTAAACGTTGTCGT    |       |       |       |       |       |       |       |
|                                                     | (1)     | -----                                                                           |       |       |       |       |       |       |       |
|                                                     |         | Section 822                                                                     |       |       |       |       |       |       |       |
| Autographa californica nucleopolyhedrovirus NC 0... | (63218) | 63218                                                                           | 63228 | 63239 | 63250 | 63261 | 63272 | 63283 | 63294 |
|                                                     | (63218) | CCACGAATCTATGCAATGTAAATGTTACACTGACATTGTTTAAACAATGCATGTATTAAAAATCAACCTGTCGCCTA   |       |       |       |       |       |       |       |
|                                                     | (1)     | -----                                                                           |       |       |       |       |       |       |       |
|                                                     |         | Section 823                                                                     |       |       |       |       |       |       |       |
| Autographa californica nucleopolyhedrovirus NC 0... | (63295) | 63295                                                                           | 63305 | 63316 | 63327 | 63338 | 63349 | 63360 | 63371 |
|                                                     | (63295) | CTGAGTTTATTAGAAAGAGTCGACCGTTTCTACTAGTTTGTAGATTTTGTTATTTTCAATTTTCATTGTTTAAAAACAT |       |       |       |       |       |       |       |
|                                                     | (1)     | -----                                                                           |       |       |       |       |       |       |       |
|                                                     |         | Section 824                                                                     |       |       |       |       |       |       |       |
| Autographa californica nucleopolyhedrovirus NC 0... | (63372) | 63372                                                                           | 63382 | 63393 | 63404 | 63415 | 63426 | 63437 | 63448 |
|                                                     | (63372) | GTTAACTACTCGTTTGAGTTTAAGCGAAAAATCCTTGTCGGATAGACTTGTTTCGCACAGCCAATTGCTAAGAGTGG   |       |       |       |       |       |       |       |
|                                                     | (1)     | -----                                                                           |       |       |       |       |       |       |       |
|                                                     |         | Section 825                                                                     |       |       |       |       |       |       |       |
| Autographa californica nucleopolyhedrovirus NC 0... | (63449) | 63449                                                                           | 63459 | 63470 | 63481 | 63492 | 63503 | 63514 | 63525 |
|                                                     | (63449) | TTTTGACCACGGACACCTTGGTGGTGAACGTCGTCGATTTGACCAGTTCGGTGAAAAAGTTTTTCATTAAATTGGAC   |       |       |       |       |       |       |       |
|                                                     | (1)     | -----                                                                           |       |       |       |       |       |       |       |
|                                                     |         | Section 826                                                                     |       |       |       |       |       |       |       |
| Autographa californica nucleopolyhedrovirus NC 0... | (63526) | 63526                                                                           | 63536 | 63547 | 63558 | 63569 | 63580 | 63591 | 63602 |
|                                                     | (63526) | ATTTTAACAAACACTTATCAATCTATTGAGCTGGTATTTTTGTTTAGAATCGCATCAAGCGCTTGCTCGATCTCCAA   |       |       |       |       |       |       |       |
|                                                     | (1)     | -----                                                                           |       |       |       |       |       |       |       |

## SARS-CoV-2 &amp; Autographa californica nucleopolyhedrovirus.apr

|                                                                                |         |                                                                               |       |       |       |       |       |       |             |
|--------------------------------------------------------------------------------|---------|-------------------------------------------------------------------------------|-------|-------|-------|-------|-------|-------|-------------|
|                                                                                |         |                                                                               |       |       |       |       |       |       | Section 827 |
| Autographa californica nucleopolyhedrovirus NC 045512.2 SARS-CoV-2 NC_045512.2 | (63603) | 63603                                                                         | 63613 | 63624 | 63635 | 63646 | 63657 | 63668 | 63679       |
|                                                                                | (63603) | TTTTTTTCGGACGCTCTTAGCTTTATGACTCGGTATGTCTTCTACGGTAGACTCGGTGTTCTTACTTATAATGGCCG |       |       |       |       |       |       |             |
|                                                                                | (1)     | -----                                                                         |       |       |       |       |       |       |             |
|                                                                                |         |                                                                               |       |       |       |       |       |       | Section 828 |
| Autographa californica nucleopolyhedrovirus NC 045512.2 SARS-CoV-2 NC_045512.2 | (63680) | 63680                                                                         | 63690 | 63701 | 63712 | 63723 | 63734 | 63745 | 63756       |
|                                                                                | (63680) | GGCTGACGATAATAAACACGAGAAACAATATGAGCAGATACAAAAAGATGCTGTTTTCTTTTTGTGCATACACTAGG |       |       |       |       |       |       |             |
|                                                                                | (1)     | -----                                                                         |       |       |       |       |       |       |             |
|                                                                                |         |                                                                               |       |       |       |       |       |       | Section 829 |
| Autographa californica nucleopolyhedrovirus NC 045512.2 SARS-CoV-2 NC_045512.2 | (63757) | 63757                                                                         | 63767 | 63778 | 63789 | 63800 | 63811 | 63822 | 63833       |
|                                                                                | (63757) | CTAAATATGGCCAGTGCGCCCAACAACAATAAATTCATTTTTATTCCCTTACTCTATTTCGTTGCGATAGTACAA   |       |       |       |       |       |       |             |
|                                                                                | (1)     | -----                                                                         |       |       |       |       |       |       |             |
|                                                                                |         |                                                                               |       |       |       |       |       |       | Section 830 |
| Autographa californica nucleopolyhedrovirus NC 045512.2 SARS-CoV-2 NC_045512.2 | (63834) | 63834                                                                         | 63844 | 63855 | 63866 | 63877 | 63888 | 63899 | 63910       |
|                                                                                | (63834) | CAACGATTCTCCCGACGAACCGGACGAATTGCGATTATGCTGCGCGTCGTCGTCGTCGTTGTTGTTCTCCTCTTCGC |       |       |       |       |       |       |             |
|                                                                                | (1)     | -----                                                                         |       |       |       |       |       |       |             |
|                                                                                |         |                                                                               |       |       |       |       |       |       | Section 831 |
| Autographa californica nucleopolyhedrovirus NC 045512.2 SARS-CoV-2 NC_045512.2 | (63911) | 63911                                                                         | 63921 | 63932 | 63943 | 63954 | 63965 | 63976 | 63987       |
|                                                                                | (63911) | TGCTCGTTTCGTCTAAACCTATATTGTATTGTTCAAGTAATGTTTGGTGCTTGCGGAGGATTCGTGGTTTCATTAAT |       |       |       |       |       |       |             |
|                                                                                | (1)     | -----                                                                         |       |       |       |       |       |       |             |
|                                                                                |         |                                                                               |       |       |       |       |       |       | Section 832 |
| Autographa californica nucleopolyhedrovirus NC 045512.2 SARS-CoV-2 NC_045512.2 | (63988) | 63988                                                                         | 63998 | 64009 | 64020 | 64031 | 64042 | 64053 | 64064       |
|                                                                                | (63988) | TTGGCCACTTTTTGTAAAGGCACGCCGCTATTGTATAGGTTACTGCTCAAATAATGTCTTATCATGTTGCTGCGCGG |       |       |       |       |       |       |             |
|                                                                                | (1)     | -----                                                                         |       |       |       |       |       |       |             |
|                                                                                |         |                                                                               |       |       |       |       |       |       | Section 833 |
| Autographa californica nucleopolyhedrovirus NC 045512.2 SARS-CoV-2 NC_045512.2 | (64065) | 64065                                                                         | 64075 | 64086 | 64097 | 64108 | 64119 | 64130 | 64141       |
|                                                                                | (64065) | CCGTTCCATCTCGACGCCCGACTCTTCAAGGAGTCGCCTGAAATCTTTGAAGGGCGTCGAGGTGTTTTAGATATTT  |       |       |       |       |       |       |             |
|                                                                                | (1)     | -----                                                                         |       |       |       |       |       |       |             |

## SARS-CoV-2 &amp; Autographa californica nucleopolyhedrovirus.apr

|                                                     |         |                                                                               |       |       |       |       |       |       |       |
|-----------------------------------------------------|---------|-------------------------------------------------------------------------------|-------|-------|-------|-------|-------|-------|-------|
|                                                     |         | Section 834                                                                   |       |       |       |       |       |       |       |
| Autographa californica nucleopolyhedrovirus NC 0... | (64142) | 64142                                                                         | 64152 | 64163 | 64174 | 64185 | 64196 | 64207 | 64218 |
|                                                     | (64142) | GCAAAATGGTCGGGTTTCGTGAATAAATCTCGCGTGCCAATTCCAACGGTTTCATTTTGATGTTGTTGAGTGTGTTA |       |       |       |       |       |       |       |
|                                                     | (1)     | -----                                                                         |       |       |       |       |       |       |       |
|                                                     |         | Section 835                                                                   |       |       |       |       |       |       |       |
| Autographa californica nucleopolyhedrovirus NC 0... | (64219) | 64219                                                                         | 64229 | 64240 | 64251 | 64262 | 64273 | 64284 | 64295 |
|                                                     | (64219) | TTACGACTGCGTTTTTCGCTTTAAATTAATCGTGTGCTGTGCAGTTTTCTCTTTTAATTAGCACGTTGAGATCGTC  |       |       |       |       |       |       |       |
|                                                     | (1)     | -----                                                                         |       |       |       |       |       |       |       |
|                                                     |         | Section 836                                                                   |       |       |       |       |       |       |       |
| Autographa californica nucleopolyhedrovirus NC 0... | (64296) | 64296                                                                         | 64306 | 64317 | 64328 | 64339 | 64350 | 64361 | 64372 |
|                                                     | (64296) | CACGCTGAGTTGGCGCGCTTCGTTGATTTCGCATACCCGTCCTAACATGATGCAAAACACTATCGCGCCCCTAATTA |       |       |       |       |       |       |       |
|                                                     | (1)     | -----                                                                         |       |       |       |       |       |       |       |
|                                                     |         | Section 837                                                                   |       |       |       |       |       |       |       |
| Autographa californica nucleopolyhedrovirus NC 0... | (64373) | 64373                                                                         | 64383 | 64394 | 64405 | 64416 | 64427 | 64438 | 64449 |
|                                                     | (64373) | GACCGCGGTCGTGAACATAATCGCTGTTGAGCATTTTAATTTTATCATTAATAAAATTTAATATGGTATCTATTACG |       |       |       |       |       |       |       |
|                                                     | (1)     | -----                                                                         |       |       |       |       |       |       |       |
|                                                     |         | Section 838                                                                   |       |       |       |       |       |       |       |
| Autographa californica nucleopolyhedrovirus NC 0... | (64450) | 64450                                                                         | 64460 | 64471 | 64482 | 64493 | 64504 | 64515 | 64526 |
|                                                     | (64450) | TTTTTAAGCATTAAATTCCTTTTCCCTGATATTTTGAGCTCCTTGTCGCGCGGCAGCATAACCATGCGGGG       |       |       |       |       |       |       |       |
|                                                     | (1)     | -----                                                                         |       |       |       |       |       |       |       |
|                                                     |         | Section 839                                                                   |       |       |       |       |       |       |       |
| Autographa californica nucleopolyhedrovirus NC 0... | (64527) | 64527                                                                         | 64537 | 64548 | 64559 | 64570 | 64581 | 64592 | 64603 |
|                                                     | (64527) | AATTTTGTATTTCGGGCAAGTTCATCATGTTGGTGTAAGTTTATAGTCAACTGTAGTGTTCCTTTGGTGACCGAGC  |       |       |       |       |       |       |       |
|                                                     | (1)     | -----                                                                         |       |       |       |       |       |       |       |
|                                                     |         | Section 840                                                                   |       |       |       |       |       |       |       |
| Autographa californica nucleopolyhedrovirus NC 0... | (64604) | 64604                                                                         | 64614 | 64625 | 64636 | 64647 | 64658 | 64669 | 64680 |
|                                                     | (64604) | GAAGTTCGAGCATGCGCCTGCACAGTTCTTGGGGATCAATGAGAAGTGTGTTTTCTATCGAGTCAAACCTCTTG    |       |       |       |       |       |       |       |
|                                                     | (1)     | -----                                                                         |       |       |       |       |       |       |       |



## SARS-CoV-2 &amp; Autographa californica nucleopolyhedrovirus.apr

|                                                     |         |                                                                                |       |       |       |       |       |       |       |
|-----------------------------------------------------|---------|--------------------------------------------------------------------------------|-------|-------|-------|-------|-------|-------|-------|
|                                                     |         | Section 841                                                                    |       |       |       |       |       |       |       |
| Autographa californica nucleopolyhedrovirus NC 0... | (64681) | 64681                                                                          | 64691 | 64702 | 64713 | 64724 | 64735 | 64746 | 64757 |
|                                                     | (64681) | TCCAACGAGTACGACATGTCTTCCAGGTGAACATCGTCTACCGAGCAGTACACAATTTTAATGAATCGAGACTTGTA  |       |       |       |       |       |       |       |
|                                                     | (1)     | -----                                                                          |       |       |       |       |       |       |       |
|                                                     |         | Section 842                                                                    |       |       |       |       |       |       |       |
| Autographa californica nucleopolyhedrovirus NC 0... | (64758) | 64758                                                                          | 64768 | 64779 | 64790 | 64801 | 64812 | 64823 | 64834 |
|                                                     | (64758) | ACTTTTTAAAGTGGTGGGCGCAAACGGTTTGGGGAACATGTACTTGCTCCACAGACTGTTGTTTTTCACCTCGTCGG  |       |       |       |       |       |       |       |
|                                                     | (1)     | -----                                                                          |       |       |       |       |       |       |       |
|                                                     |         | Section 843                                                                    |       |       |       |       |       |       |       |
| Autographa californica nucleopolyhedrovirus NC 0... | (64835) | 64835                                                                          | 64845 | 64856 | 64867 | 64878 | 64889 | 64900 | 64911 |
|                                                     | (64835) | GCGTGCAATCGTTGCCGATCGGTGGCCAAATCGAACACGGACTCGAACCAGGAGCGGATTGAATTTTTATTTTCCAA  |       |       |       |       |       |       |       |
|                                                     | (1)     | -----                                                                          |       |       |       |       |       |       |       |
|                                                     |         | Section 844                                                                    |       |       |       |       |       |       |       |
| Autographa californica nucleopolyhedrovirus NC 0... | (64912) | 64912                                                                          | 64922 | 64933 | 64944 | 64955 | 64966 | 64977 | 64988 |
|                                                     | (64912) | GAATTAAATTTGTTTTCGTTGCGAACATTAAACCGTTCATTGTGGTTAATCAAATTTATTAAAAACAAAAGGAGAA   |       |       |       |       |       |       |       |
|                                                     | (1)     | -----                                                                          |       |       |       |       |       |       |       |
|                                                     |         | Section 845                                                                    |       |       |       |       |       |       |       |
| Autographa californica nucleopolyhedrovirus NC 0... | (64989) | 64989                                                                          | 64999 | 65010 | 65021 | 65032 | 65043 | 65054 | 65065 |
|                                                     | (64989) | TCGGTGTCAATACTATCCGAATATTGTTGTTGTTCTCTTAATATTACGAAATAATATATTACATACAGCAGTAAGAA  |       |       |       |       |       |       |       |
|                                                     | (1)     | -----                                                                          |       |       |       |       |       |       |       |
|                                                     |         | Section 846                                                                    |       |       |       |       |       |       |       |
| Autographa californica nucleopolyhedrovirus NC 0... | (65066) | 65066                                                                          | 65076 | 65087 | 65098 | 65109 | 65120 | 65131 | 65142 |
|                                                     | (65066) | TAAAGCTATAAAAGCGACTACACTAATTAAAAATTATAATTCCCGCCGACACGTTGCTCGTCGTGTTGTCATAGCCCA |       |       |       |       |       |       |       |
|                                                     | (1)     | -----                                                                          |       |       |       |       |       |       |       |
|                                                     |         | Section 847                                                                    |       |       |       |       |       |       |       |
| Autographa californica nucleopolyhedrovirus NC 0... | (65143) | 65143                                                                          | 65153 | 65164 | 65175 | 65186 | 65197 | 65208 | 65219 |
|                                                     | (65143) | CCATGTCGTTTATTGGCATTGTTGTGAACGGGCTCGCTAAATTGTTGCGGTTGCTGGCAGTATCGTCGTTGAGCGCC  |       |       |       |       |       |       |       |
|                                                     | (1)     | -----                                                                          |       |       |       |       |       |       |       |

## SARS-CoV-2 &amp; Autographa californica nucleopolyhedrovirus.apr

|                                                     |                        |                                                                                 |       |       |       |       |       |       |       |
|-----------------------------------------------------|------------------------|---------------------------------------------------------------------------------|-------|-------|-------|-------|-------|-------|-------|
| Section 848                                         |                        |                                                                                 |       |       |       |       |       |       |       |
| Autographa californica nucleopolyhedrovirus NC 0... | (65220)                | 65220                                                                           | 65230 | 65241 | 65252 | 65263 | 65274 | 65285 | 65296 |
|                                                     | (65220)                | AATTTCAACGGGATGTATTCCACCTTTTCGTGGTTGCCCAACCGATAGTAGGGCACGTCCAAATTCATGTTTACAAC   |       |       |       |       |       |       |       |
|                                                     | SARS-CoV-2 NC_045512.2 | (1)                                                                             | ----- |       |       |       |       |       |       |
| Section 849                                         |                        |                                                                                 |       |       |       |       |       |       |       |
| Autographa californica nucleopolyhedrovirus NC 0... | (65297)                | 65297                                                                           | 65307 | 65318 | 65329 | 65340 | 65351 | 65362 | 65373 |
|                                                     | (65297)                | TTATTTGCTAACAGGAATTTATGCAACAAAAGTGGTTTGGCTTTGATGAGACGCAATTTGAAATACTTGCTGCATTT   |       |       |       |       |       |       |       |
|                                                     | SARS-CoV-2 NC_045512.2 | (1)                                                                             | ----- |       |       |       |       |       |       |
| Section 850                                         |                        |                                                                                 |       |       |       |       |       |       |       |
| Autographa californica nucleopolyhedrovirus NC 0... | (65374)                | 65374                                                                           | 65384 | 65395 | 65406 | 65417 | 65428 | 65439 | 65450 |
|                                                     | (65374)                | ACGCTTAAGATTGTATTCCATGCGGGCGGCGGTGTTGTAGTCGTACGCGCTCGCGCTGTGATACACGAGCCGTAAAT   |       |       |       |       |       |       |       |
|                                                     | SARS-CoV-2 NC_045512.2 | (1)                                                                             | ----- |       |       |       |       |       |       |
| Section 851                                         |                        |                                                                                 |       |       |       |       |       |       |       |
| Autographa californica nucleopolyhedrovirus NC 0... | (65451)                | 65451                                                                           | 65461 | 65472 | 65483 | 65494 | 65505 | 65516 | 65527 |
|                                                     | (65451)                | TGGTTGCGTTGCGCAAACACTTGCGGCCTTGTGTTGTTGCAATGCTGTTTTATGCGTCTGTTAAGATTGCTCGTGATG  |       |       |       |       |       |       |       |
|                                                     | SARS-CoV-2 NC_045512.2 | (1)                                                                             | ----- |       |       |       |       |       |       |
| Section 852                                         |                        |                                                                                 |       |       |       |       |       |       |       |
| Autographa californica nucleopolyhedrovirus NC 0... | (65528)                | 65528                                                                           | 65538 | 65549 | 65560 | 65571 | 65582 | 65593 | 65604 |
|                                                     | (65528)                | CCCGTGTAACAATTTTCATTGTCTTGCCGCAGAAATGTACACGCACCACACCTTGTTGGTGTACAGAGTCGTCGCCAT  |       |       |       |       |       |       |       |
|                                                     | SARS-CoV-2 NC_045512.2 | (1)                                                                             | ----- |       |       |       |       |       |       |
| Section 853                                         |                        |                                                                                 |       |       |       |       |       |       |       |
| Autographa californica nucleopolyhedrovirus NC 0... | (65605)                | 65605                                                                           | 65615 | 65626 | 65637 | 65648 | 65659 | 65670 | 65681 |
|                                                     | (65605)                | GATTATGCAGTGCGCCCTTTTCGTGTTTCGGCCGAGTGGCGTTAGGCGCAGCCGCGGCAATAATCGCGTTGGCGTCCTT |       |       |       |       |       |       |       |
|                                                     | SARS-CoV-2 NC_045512.2 | (1)                                                                             | ----- |       |       |       |       |       |       |
| Section 854                                         |                        |                                                                                 |       |       |       |       |       |       |       |
| Autographa californica nucleopolyhedrovirus NC 0... | (65682)                | 65682                                                                           | 65692 | 65703 | 65714 | 65725 | 65736 | 65747 | 65758 |
|                                                     | (65682)                | GTTGTAATTTATTTGTTGAAAAATAAAACGTCTTAGAGTTTCGTTTTGGAACGCCAATTCGGTCAAGCTCTCCTGGC   |       |       |       |       |       |       |       |
|                                                     | SARS-CoV-2 NC_045512.2 | (1)                                                                             | ----- |       |       |       |       |       |       |

## SARS-CoV-2 &amp; Autographa californica nucleopolyhedrovirus.apr

|                                                     |         |                                                                                |                       |                       |                       |                       |                       |                       |                       |
|-----------------------------------------------------|---------|--------------------------------------------------------------------------------|-----------------------|-----------------------|-----------------------|-----------------------|-----------------------|-----------------------|-----------------------|
|                                                     |         | Section 855                                                                    |                       |                       |                       |                       |                       |                       |                       |
| Autographa californica nucleopolyhedrovirus NC 0... | (65759) | <a href="#">65759</a>                                                          | <a href="#">65769</a> | <a href="#">65780</a> | <a href="#">65791</a> | <a href="#">65802</a> | <a href="#">65813</a> | <a href="#">65824</a> | <a href="#">65835</a> |
|                                                     | (65759) | AAGCGCTTTTGGTCAAATGAGCGGCCGGCGAATTGACCGCGTTGGCGGCCGACGTTAAGAAGGTGGCGTTCTGGAAC  |                       |                       |                       |                       |                       |                       |                       |
| SARS-CoV-2 NC_045512.2                              | (1)     | -----                                                                          |                       |                       |                       |                       |                       |                       |                       |
|                                                     |         | Section 856                                                                    |                       |                       |                       |                       |                       |                       |                       |
| Autographa californica nucleopolyhedrovirus NC 0... | (65836) | <a href="#">65836</a>                                                          | <a href="#">65846</a> | <a href="#">65857</a> | <a href="#">65868</a> | <a href="#">65879</a> | <a href="#">65890</a> | <a href="#">65901</a> | <a href="#">65912</a> |
|                                                     | (65836) | ATGCTGGGCTGCTTGCCGGCTCGCGTCGCCAGCTCGGCCATGTAATTGAATATGTTGGCAGACGCAGATAGCGGCGC  |                       |                       |                       |                       |                       |                       |                       |
| SARS-CoV-2 NC_045512.2                              | (1)     | -----                                                                          |                       |                       |                       |                       |                       |                       |                       |
|                                                     |         | Section 857                                                                    |                       |                       |                       |                       |                       |                       |                       |
| Autographa californica nucleopolyhedrovirus NC 0... | (65913) | <a href="#">65913</a>                                                          | <a href="#">65923</a> | <a href="#">65934</a> | <a href="#">65945</a> | <a href="#">65956</a> | <a href="#">65967</a> | <a href="#">65978</a> | <a href="#">65989</a> |
|                                                     | (65913) | CAAAAACGCAACGTTCTCTTTTAAACTCATGACTCGCGCCCTGTTTTTTTCGTTTCAGCACGTAGTGGTAGTAATCGC |                       |                       |                       |                       |                       |                       |                       |
| SARS-CoV-2 NC_045512.2                              | (1)     | -----                                                                          |                       |                       |                       |                       |                       |                       |                       |
|                                                     |         | Section 858                                                                    |                       |                       |                       |                       |                       |                       |                       |
| Autographa californica nucleopolyhedrovirus NC 0... | (65990) | <a href="#">65990</a>                                                          | <a href="#">66000</a> | <a href="#">66011</a> | <a href="#">66022</a> | <a href="#">66033</a> | <a href="#">66044</a> | <a href="#">66055</a> | <a href="#">66066</a> |
|                                                     | (65990) | CGCCGCCGGCAAACAGATCGTCAATCACGGCGTTGATCAGATCGTTGATCATGTTGATGTGCGGAAAGCGACGCGAC  |                       |                       |                       |                       |                       |                       |                       |
| SARS-CoV-2 NC_045512.2                              | (1)     | -----                                                                          |                       |                       |                       |                       |                       |                       |                       |
|                                                     |         | Section 859                                                                    |                       |                       |                       |                       |                       |                       |                       |
| Autographa californica nucleopolyhedrovirus NC 0... | (66067) | <a href="#">66067</a>                                                          | <a href="#">66077</a> | <a href="#">66088</a> | <a href="#">66099</a> | <a href="#">66110</a> | <a href="#">66121</a> | <a href="#">66132</a> | <a href="#">66143</a> |
|                                                     | (66067) | TCGACTGCGCTCTGTATGTTTGGCGGCAGAGTGGCGTGCTTGAGCAACAGAGTCATGTAATTGTTGGCCAGCTGCTG  |                       |                       |                       |                       |                       |                       |                       |
| SARS-CoV-2 NC_045512.2                              | (1)     | -----                                                                          |                       |                       |                       |                       |                       |                       |                       |
|                                                     |         | Section 860                                                                    |                       |                       |                       |                       |                       |                       |                       |
| Autographa californica nucleopolyhedrovirus NC 0... | (66144) | <a href="#">66144</a>                                                          | <a href="#">66154</a> | <a href="#">66165</a> | <a href="#">66176</a> | <a href="#">66187</a> | <a href="#">66198</a> | <a href="#">66209</a> | <a href="#">66220</a> |
|                                                     | (66144) | ATTGAAAGGTAACGGAATGGGAATGTTGCACGTCACCGCTTCCGCCACCATGTACTGGACGGCCAGACTGAGTTGTT  |                       |                       |                       |                       |                       |                       |                       |
| SARS-CoV-2 NC_045512.2                              | (1)     | -----                                                                          |                       |                       |                       |                       |                       |                       |                       |
|                                                     |         | Section 861                                                                    |                       |                       |                       |                       |                       |                       |                       |
| Autographa californica nucleopolyhedrovirus NC 0... | (66221) | <a href="#">66221</a>                                                          | <a href="#">66231</a> | <a href="#">66242</a> | <a href="#">66253</a> | <a href="#">66264</a> | <a href="#">66275</a> | <a href="#">66286</a> | <a href="#">66297</a> |
|                                                     | (66221) | TGGCGGCCTCGGCCAAAGCGTCTTTGCCCAACATATCAGCGCCACCGTTGTAAACTTTTGCGCGTACGCCGGCAGC   |                       |                       |                       |                       |                       |                       |                       |
| SARS-CoV-2 NC_045512.2                              | (1)     | -----                                                                          |                       |                       |                       |                       |                       |                       |                       |

## SARS-CoV-2 &amp; Autographa californica nucleopolyhedrovirus.apr

|                                                     |         |                                                                               |       |       |       |       |       |       |       |
|-----------------------------------------------------|---------|-------------------------------------------------------------------------------|-------|-------|-------|-------|-------|-------|-------|
|                                                     |         | Section 862                                                                   |       |       |       |       |       |       |       |
| Autographa californica nucleopolyhedrovirus NC 0... | (66298) | 66298                                                                         | 66308 | 66319 | 66330 | 66341 | 66352 | 66363 | 66374 |
|                                                     | (66298) | GAATTTAGCACAAACGATGGCTGAAATATATTTGAATCGCTCGACAGGGACTCGGCCGCGTTGCTCTGTCCCAACTC |       |       |       |       |       |       |       |
| SARS-CoV-2 NC_045512.2                              | (1)     | -----                                                                         |       |       |       |       |       |       |       |
|                                                     |         | Section 863                                                                   |       |       |       |       |       |       |       |
| Autographa californica nucleopolyhedrovirus NC 0... | (66375) | 66375                                                                         | 66385 | 66396 | 66407 | 66418 | 66429 | 66440 | 66451 |
|                                                     | (66375) | TTTTTGCAACCGAATCAGGTGGCGTATCATGGTTTCCTCCGATTCAAACCGCTTTACCACGTTTACGCTGATTGGGT |       |       |       |       |       |       |       |
| SARS-CoV-2 NC_045512.2                              | (1)     | -----                                                                         |       |       |       |       |       |       |       |
|                                                     |         | Section 864                                                                   |       |       |       |       |       |       |       |
| Autographa californica nucleopolyhedrovirus NC 0... | (66452) | 66452                                                                         | 66462 | 66473 | 66484 | 66495 | 66506 | 66517 | 66528 |
|                                                     | (66452) | TCGTGTCGATGCACATGTCACGAATAGTGTATATAAAGAATCATGAGAGGACTAAGTTCTGACATGTCATTGCAC   |       |       |       |       |       |       |       |
| SARS-CoV-2 NC_045512.2                              | (1)     | -----                                                                         |       |       |       |       |       |       |       |
|                                                     |         | Section 865                                                                   |       |       |       |       |       |       |       |
| Autographa californica nucleopolyhedrovirus NC 0... | (66529) | 66529                                                                         | 66539 | 66550 | 66561 | 66572 | 66583 | 66594 | 66605 |
|                                                     | (66529) | CTGTAATATCTAATAATCTTTGAACAAAATCCACACATTTGTTGTACCAAATAGATTCACCGGCGTCGAGCGTCGG  |       |       |       |       |       |       |       |
| SARS-CoV-2 NC_045512.2                              | (1)     | -----                                                                         |       |       |       |       |       |       |       |
|                                                     |         | Section 866                                                                   |       |       |       |       |       |       |       |
| Autographa californica nucleopolyhedrovirus NC 0... | (66606) | 66606                                                                         | 66616 | 66627 | 66638 | 66649 | 66660 | 66671 | 66682 |
|                                                     | (66606) | TTCTTTGCTCTTGTGTACGGTGCAATCGCTACCGAGTTTGTGCTGTTGCTGCGGCTCGTGTAATCCATCCTGTTGT  |       |       |       |       |       |       |       |
| SARS-CoV-2 NC_045512.2                              | (1)     | -----                                                                         |       |       |       |       |       |       |       |
|                                                     |         | Section 867                                                                   |       |       |       |       |       |       |       |
| Autographa californica nucleopolyhedrovirus NC 0... | (66683) | 66683                                                                         | 66693 | 66704 | 66715 | 66726 | 66737 | 66748 | 66759 |
|                                                     | (66683) | CGCGCGTGGCGACGGTCGTAGGCACCGTCGCCGGCGGCACGTACCGGGCGCGTTGTAAGTTTGCGCGCTGGTGAAT  |       |       |       |       |       |       |       |
| SARS-CoV-2 NC_045512.2                              | (1)     | -----                                                                         |       |       |       |       |       |       |       |
|                                                     |         | Section 868                                                                   |       |       |       |       |       |       |       |
| Autographa californica nucleopolyhedrovirus NC 0... | (66760) | 66760                                                                         | 66770 | 66781 | 66792 | 66803 | 66814 | 66825 | 66836 |
|                                                     | (66760) | ATGGCCGTTGCCGATTAGAGGGATACCTCAGCGGCGGAGGGGTGTTGTAATAAAAATTGCCACGTTTCATCTGTCAT |       |       |       |       |       |       |       |
| SARS-CoV-2 NC_045512.2                              | (1)     | -----                                                                         |       |       |       |       |       |       |       |

## SARS-CoV-2 &amp; Autographa californica nucleopolyhedrovirus.apr

|                                                     |         |                                                                                |       |       |       |       |       |       |       |
|-----------------------------------------------------|---------|--------------------------------------------------------------------------------|-------|-------|-------|-------|-------|-------|-------|
|                                                     |         | Section 869                                                                    |       |       |       |       |       |       |       |
| Autographa californica nucleopolyhedrovirus NC 0... | (66837) | 66837                                                                          | 66847 | 66858 | 66869 | 66880 | 66891 | 66902 | 66913 |
|                                                     | (66837) | ACTTTTATTTGTACTCTTATGATTACAAACTCAATATACGGATTACTTATAATATAGTTGTTGTGACAAAAAAGC    |       |       |       |       |       |       |       |
|                                                     | (1)     | -----                                                                          |       |       |       |       |       |       |       |
|                                                     |         | Section 870                                                                    |       |       |       |       |       |       |       |
| Autographa californica nucleopolyhedrovirus NC 0... | (66914) | 66914                                                                          | 66924 | 66935 | 66946 | 66957 | 66968 | 66979 | 66990 |
|                                                     | (66914) | GATAATAAAATTAACAAATTATCAACAAGTTAATCATGGAAAATTTTCAACGTTGAATAACAACAACAAATGGC     |       |       |       |       |       |       |       |
|                                                     | (1)     | -----                                                                          |       |       |       |       |       |       |       |
|                                                     |         | Section 871                                                                    |       |       |       |       |       |       |       |
| Autographa californica nucleopolyhedrovirus NC 0... | (66991) | 66991                                                                          | 67001 | 67012 | 67023 | 67034 | 67045 | 67056 | 67067 |
|                                                     | (66991) | GCAGGTCAACAGCACCGTTTGAAAACGTACGCGCCGACACAAAATGCTTTCGCAATTTCTAAAAGCCACATTAAACG  |       |       |       |       |       |       |       |
|                                                     | (1)     | -----                                                                          |       |       |       |       |       |       |       |
|                                                     |         | Section 872                                                                    |       |       |       |       |       |       |       |
| Autographa californica nucleopolyhedrovirus NC 0... | (67068) | 67068                                                                          | 67078 | 67089 | 67100 | 67111 | 67122 | 67133 | 67144 |
|                                                     | (67068) | AATTTTCACCTTTGATATAATCACGCAGTTCTTTTTTACAACATTCGTCGCACAAAATTAACACCTTTATAATGAGG  |       |       |       |       |       |       |       |
|                                                     | (1)     | -----                                                                          |       |       |       |       |       |       |       |
|                                                     |         | Section 873                                                                    |       |       |       |       |       |       |       |
| Autographa californica nucleopolyhedrovirus NC 0... | (67145) | 67145                                                                          | 67155 | 67166 | 67177 | 67188 | 67199 | 67210 | 67221 |
|                                                     | (67145) | CCGTCGGTGTGTATCGTTTGAAATGTCCGCGGTTGACTGCCTGGATGAAATTCAAACGAGTACCCAGTGGACACGTG  |       |       |       |       |       |       |       |
|                                                     | (1)     | -----                                                                          |       |       |       |       |       |       |       |
|                                                     |         | Section 874                                                                    |       |       |       |       |       |       |       |
| Autographa californica nucleopolyhedrovirus NC 0... | (67222) | 67222                                                                          | 67232 | 67243 | 67254 | 67265 | 67276 | 67287 | 67298 |
|                                                     | (67222) | TATCTGTGCAAAATAATGGGCTAATATCGAGGCGCCGTTTTTTTAAACCTTTACTTTTGATATTTTAATAACATTAA  |       |       |       |       |       |       |       |
|                                                     | (1)     | -----                                                                          |       |       |       |       |       |       |       |
|                                                     |         | Section 875                                                                    |       |       |       |       |       |       |       |
| Autographa californica nucleopolyhedrovirus NC 0... | (67299) | 67299                                                                          | 67309 | 67320 | 67331 | 67342 | 67353 | 67364 | 67375 |
|                                                     | (67299) | TGTTGTTATTTGCGTAATCAGAGTTTTTATTGTGGTGATCATCGTACAAATAATGAAGCAACAGTTCACATATCGTAT |       |       |       |       |       |       |       |
|                                                     | (1)     | -----                                                                          |       |       |       |       |       |       |       |

## SARS-CoV-2 &amp; Autographa californica nucleopolyhedrovirus.apr

|                                                     |         |                                                                                |       |       |       |       |       |       |       |
|-----------------------------------------------------|---------|--------------------------------------------------------------------------------|-------|-------|-------|-------|-------|-------|-------|
|                                                     |         | Section 876                                                                    |       |       |       |       |       |       |       |
| Autographa californica nucleopolyhedrovirus NC 0... | (67376) | 67376                                                                          | 67386 | 67397 | 67408 | 67419 | 67430 | 67441 | 67452 |
|                                                     | (67376) | TTAATCTTGTTTAGCGTTGTCAAGTTTTGTTTCTTAGGCGTTGGAGCGTCTCCGTCGTCGATATTTTCTTCGAAAT   |       |       |       |       |       |       |       |
|                                                     | (1)     | -----                                                                          |       |       |       |       |       |       |       |
|                                                     |         | Section 877                                                                    |       |       |       |       |       |       |       |
| Autographa californica nucleopolyhedrovirus NC 0... | (67453) | 67453                                                                          | 67463 | 67474 | 67485 | 67496 | 67507 | 67518 | 67529 |
|                                                     | (67453) | CGAGTCCAACAACGTCGGCGTTTCCTTCTTGCTCATCGATAGCGGCGGGAGGCGGCCTCTCCGTCGTCGTCATTC    |       |       |       |       |       |       |       |
|                                                     | (1)     | -----                                                                          |       |       |       |       |       |       |       |
|                                                     |         | Section 878                                                                    |       |       |       |       |       |       |       |
| Autographa californica nucleopolyhedrovirus NC 0... | (67530) | 67530                                                                          | 67540 | 67551 | 67562 | 67573 | 67584 | 67595 | 67606 |
|                                                     | (67530) | GCGGTTTCTACAGTGCGTTTGGGCGACGACGTGTGTACAGCAGCGTCCGTCTTACTATTATCGGACCGCCAAATTTT  |       |       |       |       |       |       |       |
|                                                     | (1)     | -----                                                                          |       |       |       |       |       |       |       |
|                                                     |         | Section 879                                                                    |       |       |       |       |       |       |       |
| Autographa californica nucleopolyhedrovirus NC 0... | (67607) | 67607                                                                          | 67617 | 67628 | 67639 | 67650 | 67661 | 67672 | 67683 |
|                                                     | (67607) | TGTTTGAAATAACATTTGGCCCTTGTTCAACTTTATTTGGCGCAGTTAAACATTATTGCATTAAGATCATATTCGC   |       |       |       |       |       |       |       |
|                                                     | (1)     | -----                                                                          |       |       |       |       |       |       |       |
|                                                     |         | Section 880                                                                    |       |       |       |       |       |       |       |
| Autographa californica nucleopolyhedrovirus NC 0... | (67684) | 67684                                                                          | 67694 | 67705 | 67716 | 67727 | 67738 | 67749 | 67760 |
|                                                     | (67684) | CGTTTTGCACCAAATTGCACAAAACACCATAGTTGCCGACGACACTGTAGAATAGGCGTTTTTGTACAACAATCTG   |       |       |       |       |       |       |       |
|                                                     | (1)     | -----                                                                          |       |       |       |       |       |       |       |
|                                                     |         | Section 881                                                                    |       |       |       |       |       |       |       |
| Autographa californica nucleopolyhedrovirus NC 0... | (67761) | 67761                                                                          | 67771 | 67782 | 67793 | 67804 | 67815 | 67826 | 67837 |
|                                                     | (67761) | AGTTGCGGCGAGCTAGCCACCTTGATAATATGGGCGCCAACGCCCGTTTTTTTAAGTAATATTGCTCTTCAATTAT   |       |       |       |       |       |       |       |
|                                                     | (1)     | -----                                                                          |       |       |       |       |       |       |       |
|                                                     |         | Section 882                                                                    |       |       |       |       |       |       |       |
| Autographa californica nucleopolyhedrovirus NC 0... | (67838) | 67838                                                                          | 67848 | 67859 | 67870 | 67881 | 67892 | 67903 | 67914 |
|                                                     | (67838) | AAAATCTAGTACGTTTTTCATCTTCACTGTTGATTTGGGCGTTCACGATGATGTCTGGCGTAATGTTGCTCATGCTTG |       |       |       |       |       |       |       |
|                                                     | (1)     | -----                                                                          |       |       |       |       |       |       |       |

## SARS-CoV-2 &amp; Autographa californica nucleopolyhedrovirus.apr

|                                                     |         |                                                                                |       |       |       |       |       |       |       |
|-----------------------------------------------------|---------|--------------------------------------------------------------------------------|-------|-------|-------|-------|-------|-------|-------|
|                                                     |         | Section 883                                                                    |       |       |       |       |       |       |       |
| Autographa californica nucleopolyhedrovirus NC 0... | (67915) | 67915                                                                          | 67925 | 67936 | 67947 | 67958 | 67969 | 67980 | 67991 |
|                                                     | (67915) | CCATTTTCTTATAATAGCGTTTACTTTAATGTATTTGGCAATTTATTTTGAATTTGACGAAACGACTTTCACCAAG   |       |       |       |       |       |       |       |
|                                                     | (1)     | -----                                                                          |       |       |       |       |       |       |       |
|                                                     |         | Section 884                                                                    |       |       |       |       |       |       |       |
| Autographa californica nucleopolyhedrovirus NC 0... | (67992) | 67992                                                                          | 68002 | 68013 | 68024 | 68035 | 68046 | 68057 | 68068 |
|                                                     | (67992) | CGGCTCCAAGTGATGACTGAATATGTGAAGCGCACCAACGCAGACGAACCCACACCCGACGTAATAGGCTACGTGTC  |       |       |       |       |       |       |       |
|                                                     | (1)     | -----                                                                          |       |       |       |       |       |       |       |
|                                                     |         | Section 885                                                                    |       |       |       |       |       |       |       |
| Autographa californica nucleopolyhedrovirus NC 0... | (68069) | 68069                                                                          | 68079 | 68090 | 68101 | 68112 | 68123 | 68134 | 68145 |
|                                                     | (68069) | GGATATTATGCAAAACACTTATATTGTAACTGGTTCAACACCGTCGACCTTTCCACCTATCACGAAAGCGTGCATG   |       |       |       |       |       |       |       |
|                                                     | (1)     | -----                                                                          |       |       |       |       |       |       |       |
|                                                     |         | Section 886                                                                    |       |       |       |       |       |       |       |
| Autographa californica nucleopolyhedrovirus NC 0... | (68146) | 68146                                                                          | 68156 | 68167 | 68178 | 68189 | 68200 | 68211 | 68222 |
|                                                     | (68146) | ATGACCGGATTGAAATTTTTGATTTCTTAAATCAAAAATTTCAACCTGTTGATCGAATCGTACGATCGCGTTAGA    |       |       |       |       |       |       |       |
|                                                     | (1)     | -----                                                                          |       |       |       |       |       |       |       |
|                                                     |         | Section 887                                                                    |       |       |       |       |       |       |       |
| Autographa californica nucleopolyhedrovirus NC 0... | (68223) | 68223                                                                          | 68233 | 68244 | 68255 | 68266 | 68277 | 68288 | 68299 |
|                                                     | (68223) | GCAAATGATGAAAATCCCAACGAGTTTATTTTGTAGCGGCGACAAGGCCGACGTGACCATGAAATGCCCCGCATATTT |       |       |       |       |       |       |       |
|                                                     | (1)     | -----                                                                          |       |       |       |       |       |       |       |
|                                                     |         | Section 888                                                                    |       |       |       |       |       |       |       |
| Autographa californica nucleopolyhedrovirus NC 0... | (68300) | 68300                                                                          | 68310 | 68321 | 68332 | 68343 | 68354 | 68365 | 68376 |
|                                                     | (68300) | TAACTTTGATTACGCACAACATAAAATGTGTTCCCGTGCCGCCGTGCGACAACAAGTCTGCCGGTCTTTATCCCATGG |       |       |       |       |       |       |       |
|                                                     | (1)     | -----                                                                          |       |       |       |       |       |       |       |
|                                                     |         | Section 889                                                                    |       |       |       |       |       |       |       |
| Autographa californica nucleopolyhedrovirus NC 0... | (68377) | 68377                                                                          | 68387 | 68398 | 68409 | 68420 | 68431 | 68442 | 68453 |
|                                                     | (68377) | ACGAGCGTTTGCTGGACACGTTGGTGTGAACCAACACTTGGACAAAGATTATTCTACCAACGCGCACTTGTATCAT   |       |       |       |       |       |       |       |
|                                                     | (1)     | -----                                                                          |       |       |       |       |       |       |       |

## SARS-CoV-2 &amp; Autographa californica nucleopolyhedrovirus.apr

|                                                     |         |                                                                                |       |       |       |       |       |       |
|-----------------------------------------------------|---------|--------------------------------------------------------------------------------|-------|-------|-------|-------|-------|-------|
|                                                     |         | Section 890                                                                    |       |       |       |       |       |       |
| Autographa californica nucleopolyhedrovirus NC 0... | (68454) | 68454                                                                          | 68464 | 68475 | 68486 | 68497 | 68508 | 68519 |
|                                                     | (68454) | CCCACGTTCTATCTTAGGTGTTTTGCAAACGGAGCGCACGCAGTCGAAGAATGTCCAGATAATTACACGTTTGACGC  |       |       |       |       |       |       |
|                                                     | (1)     | -----                                                                          |       |       |       |       |       |       |
|                                                     |         | Section 891                                                                    |       |       |       |       |       |       |
| Autographa californica nucleopolyhedrovirus NC 0... | (68531) | 68531                                                                          | 68541 | 68552 | 68563 | 68574 | 68585 | 68596 |
|                                                     | (68531) | GGAAACCGGCCAGTGTAAGTTAACGAATTGTGTGAAAACAGGCCAGACGGCTATATACTATCATACTTTCCCTCCA   |       |       |       |       |       |       |
|                                                     | (1)     | -----                                                                          |       |       |       |       |       |       |
|                                                     |         | Section 892                                                                    |       |       |       |       |       |       |
| Autographa californica nucleopolyhedrovirus NC 0... | (68608) | 68608                                                                          | 68618 | 68629 | 68640 | 68651 | 68662 | 68673 |
|                                                     | (68608) | ATTTGCTCGTCAACCAGTTTATGCAGTGCGTAAATGGGCGCCACGTGGTGGGCGAATGCCCCGCGAATAAAATATTT  |       |       |       |       |       |       |
|                                                     | (1)     | -----                                                                          |       |       |       |       |       |       |
|                                                     |         | Section 893                                                                    |       |       |       |       |       |       |
| Autographa californica nucleopolyhedrovirus NC 0... | (68685) | 68685                                                                          | 68695 | 68706 | 68717 | 68728 | 68739 | 68750 |
|                                                     | (68685) | GATCGCAACTTAATGTCGTGCGTGGAAGCGCATCCGTGCGCGTTTAACGGCGCCGGACACACGTACATAACGGCCGA  |       |       |       |       |       |       |
|                                                     | (1)     | -----                                                                          |       |       |       |       |       |       |
|                                                     |         | Section 894                                                                    |       |       |       |       |       |       |
| Autographa californica nucleopolyhedrovirus NC 0... | (68762) | 68762                                                                          | 68772 | 68783 | 68794 | 68805 | 68816 | 68827 |
|                                                     | (68762) | TATCGGCGACACGCAATATTTCAAATGTTTGAATAATAACGAGTCACAACGTGATAACGTGCATCAACCGGATCAGAA |       |       |       |       |       |       |
|                                                     | (1)     | -----                                                                          |       |       |       |       |       |       |
|                                                     |         | Section 895                                                                    |       |       |       |       |       |       |
| Autographa californica nucleopolyhedrovirus NC 0... | (68839) | 68839                                                                          | 68849 | 68860 | 68871 | 68882 | 68893 | 68904 |
|                                                     | (68839) | ACTCTGACAACCAGTACGAGTGTTCCGGCGACTCCAGATGCATAGATTTACCCAACGGTACGGGCCAACATGTATTC  |       |       |       |       |       |       |
|                                                     | (1)     | -----                                                                          |       |       |       |       |       |       |
|                                                     |         | Section 896                                                                    |       |       |       |       |       |       |
| Autographa californica nucleopolyhedrovirus NC 0... | (68916) | 68916                                                                          | 68926 | 68937 | 68948 | 68959 | 68970 | 68981 |
|                                                     | (68916) | AAACACGTTGACGACGATATTTTCGTACAACAGTGGCCAATTGGTGTGCGATAATTTTGAAGTTATTTCCGACATCGA |       |       |       |       |       |       |
|                                                     | (1)     | -----                                                                          |       |       |       |       |       |       |



## SARS-CoV-2 &amp; Autographa californica nucleopolyhedrovirus.apr

|                                                     |         |                                                                                |       |       |       |       |       |             |
|-----------------------------------------------------|---------|--------------------------------------------------------------------------------|-------|-------|-------|-------|-------|-------------|
|                                                     |         | Section 897                                                                    |       |       |       |       |       |             |
| Autographa californica nucleopolyhedrovirus NC 0... | (68993) | 68993                                                                          | 69003 | 69014 | 69025 | 69036 | 69047 | 69058 69069 |
|                                                     | (68993) | ATGTGATCAATCAAACGTGTTTGAAAACGCGTTGTTTATGGACAAATTTAGATTAAACATGCAATTCCCAACTGAGG  |       |       |       |       |       |             |
|                                                     | (1)     | -----                                                                          |       |       |       |       |       |             |
|                                                     |         | Section 898                                                                    |       |       |       |       |       |             |
| Autographa californica nucleopolyhedrovirus NC 0... | (69070) | 69070                                                                          | 69080 | 69091 | 69102 | 69113 | 69124 | 69135 69146 |
|                                                     | (69070) | TGTTTGACGGCACCAGCGTGCGTGCCAGCCACCGCGGACAATGTCAACTTTTTACGTTCCACGTTTGCCATTGAAAAT |       |       |       |       |       |             |
|                                                     | (1)     | -----                                                                          |       |       |       |       |       |             |
|                                                     |         | Section 899                                                                    |       |       |       |       |       |             |
| Autographa californica nucleopolyhedrovirus NC 0... | (69147) | 69147                                                                          | 69157 | 69168 | 69179 | 69190 | 69201 | 69212 69223 |
|                                                     | (69147) | ATTCCAAACCATTATGGCATCGACATGCAAACCTCCATGTTGGGCACGACCGAAATGGTTAAACAGTTGGTTTCCAA  |       |       |       |       |       |             |
|                                                     | (1)     | -----                                                                          |       |       |       |       |       |             |
|                                                     |         | Section 900                                                                    |       |       |       |       |       |             |
| Autographa californica nucleopolyhedrovirus NC 0... | (69224) | 69224                                                                          | 69234 | 69245 | 69256 | 69267 | 69278 | 69289 69300 |
|                                                     | (69224) | AGATTTGTCGTTAAACAACGACGCCATCTTTGCTCAATGGCTTTTGTATGCGAGAGACAAAGACGCCATCGGGCTTA  |       |       |       |       |       |             |
|                                                     | (1)     | -----                                                                          |       |       |       |       |       |             |
|                                                     |         | Section 901                                                                    |       |       |       |       |       |             |
| Autographa californica nucleopolyhedrovirus NC 0... | (69301) | 69301                                                                          | 69311 | 69322 | 69333 | 69344 | 69355 | 69366 69377 |
|                                                     | (69301) | ACCCGTTCCACGGCGAGCCTATCGACTGTTTTGGAGACAACCTGTACGATGTGTTTGACGCTAGACGCGCAAACATT  |       |       |       |       |       |             |
|                                                     | (1)     | -----                                                                          |       |       |       |       |       |             |
|                                                     |         | Section 902                                                                    |       |       |       |       |       |             |
| Autographa californica nucleopolyhedrovirus NC 0... | (69378) | 69378                                                                          | 69388 | 69399 | 69410 | 69421 | 69432 | 69443 69454 |
|                                                     | (69378) | TGTAACGATTTCGGGAACGAGCGTTTTAAAAACGCTCAATTTTGGCGATGGCGAGTTTTTAAACGTATTGAGCAGCAC |       |       |       |       |       |             |
|                                                     | (1)     | -----                                                                          |       |       |       |       |       |             |
|                                                     |         | Section 903                                                                    |       |       |       |       |       |             |
| Autographa californica nucleopolyhedrovirus NC 0... | (69455) | 69455                                                                          | 69465 | 69476 | 69487 | 69498 | 69509 | 69520 69531 |
|                                                     | (69455) | GCTGACCGGAAAAGATGAGGATTATCGCCAATTTTGTGCTATATCCTACGAAAACGGCCAAAAAATCGTAGAAAACG  |       |       |       |       |       |             |
|                                                     | (1)     | -----                                                                          |       |       |       |       |       |             |

## SARS-CoV-2 &amp; Autographa californica nucleopolyhedrovirus.apr

|                                                     |         |                                                                                |       |       |       |       |       |             |
|-----------------------------------------------------|---------|--------------------------------------------------------------------------------|-------|-------|-------|-------|-------|-------------|
|                                                     |         | Section 904                                                                    |       |       |       |       |       |             |
| Autographa californica nucleopolyhedrovirus NC 0... | (69532) | 69532                                                                          | 69542 | 69553 | 69564 | 69575 | 69586 | 69597 69608 |
|                                                     | (69532) | AACATTTTCAGCGACGTATATTGACAAATATACTACAGTCGGACGTTTGTGCCGACCTATATACTACACTTTACCAA  |       |       |       |       |       |             |
|                                                     | (1)     | -----                                                                          |       |       |       |       |       |             |
|                                                     |         | Section 905                                                                    |       |       |       |       |       |             |
| Autographa californica nucleopolyhedrovirus NC 0... | (69609) | 69609                                                                          | 69619 | 69630 | 69641 | 69652 | 69663 | 69674 69685 |
|                                                     | (69609) | AAATATACTACACTAAACTCTAAATATACTACAACCTCCACTTCAATATAACCACACTCTCGTAAACGGCCCCAAAA  |       |       |       |       |       |             |
|                                                     | (1)     | -----                                                                          |       |       |       |       |       |             |
|                                                     |         | Section 906                                                                    |       |       |       |       |       |             |
| Autographa californica nucleopolyhedrovirus NC 0... | (69686) | 69686                                                                          | 69696 | 69707 | 69718 | 69729 | 69740 | 69751 69762 |
|                                                     | (69686) | TATCGAAATATATGGGGCAAATACACGTTTAAAAAACGCTACGATTCCAAAAACGCTGCAACTATTCCGCCCGTGT   |       |       |       |       |       |             |
|                                                     | (1)     | -----                                                                          |       |       |       |       |       |             |
|                                                     |         | Section 907                                                                    |       |       |       |       |       |             |
| Autographa californica nucleopolyhedrovirus NC 0... | (69763) | 69763                                                                          | 69773 | 69784 | 69795 | 69806 | 69817 | 69828 69839 |
|                                                     | (69763) | TTAATCCCTTTGAAAACAGCCAAATAACAGGCAAAACGATTCTATTCTACCCCTGTTTAACCCTTTTCAAACGACC   |       |       |       |       |       |             |
|                                                     | (1)     | -----                                                                          |       |       |       |       |       |             |
|                                                     |         | Section 908                                                                    |       |       |       |       |       |             |
| Autographa californica nucleopolyhedrovirus NC 0... | (69840) | 69840                                                                          | 69850 | 69861 | 69872 | 69883 | 69894 | 69905 69916 |
|                                                     | (69840) | GACGCCGTATGGTACAGCGAACCAGGTGGCGACGACGACCATTTGGGTAGTGGCGCCGCCAACCGCACCACTCCACC  |       |       |       |       |       |             |
|                                                     | (1)     | -----                                                                          |       |       |       |       |       |             |
|                                                     |         | Section 909                                                                    |       |       |       |       |       |             |
| Autographa californica nucleopolyhedrovirus NC 0... | (69917) | 69917                                                                          | 69927 | 69938 | 69949 | 69960 | 69971 | 69982 69993 |
|                                                     | (69917) | GCCCCAGCCAGAACCAGAGCCAGAACCCGAGCCAGAACCCGAGCCAGAGTTACCGTCACCGCTAATATTAGACAACA  |       |       |       |       |       |             |
|                                                     | (1)     | -----                                                                          |       |       |       |       |       |             |
|                                                     |         | Section 910                                                                    |       |       |       |       |       |             |
| Autographa californica nucleopolyhedrovirus NC 0... | (69994) | 69994                                                                          | 70004 | 70015 | 70026 | 70037 | 70048 | 70059 70070 |
|                                                     | (69994) | AAGATTTATTTTATTCATGCCACTACTCGGTTCCGTTTTTCAAGCTAACCAAGTTGTCATGCGGAAAATGACGTCATT |       |       |       |       |       |             |
|                                                     | (1)     | -----                                                                          |       |       |       |       |       |             |

## SARS-CoV-2 &amp; Autographa californica nucleopolyhedrovirus.apr

|                                                     |         |                                                                               |       |       |       |       |       |       |       |
|-----------------------------------------------------|---------|-------------------------------------------------------------------------------|-------|-------|-------|-------|-------|-------|-------|
|                                                     |         | Section 911                                                                   |       |       |       |       |       |       |       |
| Autographa californica nucleopolyhedrovirus NC 0... | (70071) | 70071                                                                         | 70081 | 70092 | 70103 | 70114 | 70125 | 70136 | 70147 |
|                                                     | (70071) | ATTGATGCTTTAAACGAGTTACGCAACAACGTTAAAGTGGACGCTGATTGCGAATTGGCCAAAGACCTATCGCACGT |       |       |       |       |       |       |       |
| SARS-CoV-2 NC_045512.2                              | (1)     | -----                                                                         |       |       |       |       |       |       |       |
|                                                     |         | Section 912                                                                   |       |       |       |       |       |       |       |
| Autographa californica nucleopolyhedrovirus NC 0... | (70148) | 70148                                                                         | 70158 | 70169 | 70180 | 70191 | 70202 | 70213 | 70224 |
|                                                     | (70148) | TTTGAACGCGTACGCTTATGTGGGCAATGGGATTGGTTGTAGATCCGCGTACGACGGAGATGCGATAGTGGTAAAA  |       |       |       |       |       |       |       |
| SARS-CoV-2 NC_045512.2                              | (1)     | -----                                                                         |       |       |       |       |       |       |       |
|                                                     |         | Section 913                                                                   |       |       |       |       |       |       |       |
| Autographa californica nucleopolyhedrovirus NC 0... | (70225) | 70225                                                                         | 70235 | 70246 | 70257 | 70268 | 70279 | 70290 | 70301 |
|                                                     | (70225) | AAGAAGCCGTGCCTAGTCACGTGTACGCCAACCTGAACACGCAATCCAACGACGGCGTCAAATACAACCGTTGGTTG |       |       |       |       |       |       |       |
| SARS-CoV-2 NC_045512.2                              | (1)     | -----                                                                         |       |       |       |       |       |       |       |
|                                                     |         | Section 914                                                                   |       |       |       |       |       |       |       |
| Autographa californica nucleopolyhedrovirus NC 0... | (70302) | 70302                                                                         | 70312 | 70323 | 70334 | 70345 | 70356 | 70367 | 70378 |
|                                                     | (70302) | CACGTCAAAAACGGCCAATACATGGCGTGTCCGAAGAATTGTACGATAACAACGAATTTAAATGTAACATAGAATC  |       |       |       |       |       |       |       |
| SARS-CoV-2 NC_045512.2                              | (1)     | -----                                                                         |       |       |       |       |       |       |       |
|                                                     |         | Section 915                                                                   |       |       |       |       |       |       |       |
| Autographa californica nucleopolyhedrovirus NC 0... | (70379) | 70379                                                                         | 70389 | 70400 | 70411 | 70422 | 70433 | 70444 | 70455 |
|                                                     | (70379) | GGATAAATTATACTATTTGGATAATTTACAAGAAGATTCCATTGTATAAACATTTTATGTCGAAAACAAATGACATC |       |       |       |       |       |       |       |
| SARS-CoV-2 NC_045512.2                              | (1)     | -----                                                                         |       |       |       |       |       |       |       |
|                                                     |         | Section 916                                                                   |       |       |       |       |       |       |       |
| Autographa californica nucleopolyhedrovirus NC 0... | (70456) | 70456                                                                         | 70466 | 70477 | 70488 | 70499 | 70510 | 70521 | 70532 |
|                                                     | (70456) | ATTCCGGATCATGATTTACGCGTAGAATTCTACTTGTAAGCAAGTTAAATAAGCCGTGTGCAAAAATGACATCAG   |       |       |       |       |       |       |       |
| SARS-CoV-2 NC_045512.2                              | (1)     | -----                                                                         |       |       |       |       |       |       |       |
|                                                     |         | Section 917                                                                   |       |       |       |       |       |       |       |
| Autographa californica nucleopolyhedrovirus NC 0... | (70533) | 70533                                                                         | 70543 | 70554 | 70565 | 70576 | 70587 | 70598 | 70609 |
|                                                     | (70533) | ACAAATGACATCATCTACCTATCATGATCATGTTAATAATCATGTTTTAAATGACATCAGCTTATGACTAATAATT  |       |       |       |       |       |       |       |
| SARS-CoV-2 NC_045512.2                              | (1)     | -----                                                                         |       |       |       |       |       |       |       |

## SARS-CoV-2 &amp; Autographa californica nucleopolyhedrovirus.apr

|                                                     |         |                                                                                |       |       |       |       |       |             |
|-----------------------------------------------------|---------|--------------------------------------------------------------------------------|-------|-------|-------|-------|-------|-------------|
|                                                     |         | Section 918                                                                    |       |       |       |       |       |             |
| Autographa californica nucleopolyhedrovirus NC 0... | (70610) | 70610                                                                          | 70620 | 70631 | 70642 | 70653 | 70664 | 70675 70686 |
|                                                     | (70610) | GATCGTGCGTTACAAGTAGAATTCTACTCGTAAAGCGAGTTTAGTTTTGAAAAACAAATGAGTCATCATTAACATG   |       |       |       |       |       |             |
|                                                     | (1)     | -----                                                                          |       |       |       |       |       |             |
|                                                     |         | Section 919                                                                    |       |       |       |       |       |             |
| Autographa californica nucleopolyhedrovirus NC 0... | (70687) | 70687                                                                          | 70697 | 70708 | 70719 | 70730 | 70741 | 70752 70763 |
|                                                     | (70687) | TTAATAATCGTGTATAAAGGATGACATCATCCACTAATCGTGCGTTACAAGTAGAATTCTACTCGTAAAGCGAGTTCT |       |       |       |       |       |             |
|                                                     | (1)     | -----                                                                          |       |       |       |       |       |             |
|                                                     |         | Section 920                                                                    |       |       |       |       |       |             |
| Autographa californica nucleopolyhedrovirus NC 0... | (70764) | 70764                                                                          | 70774 | 70785 | 70796 | 70807 | 70818 | 70829 70840 |
|                                                     | (70764) | GGTTTTGAAAAACAAATGACATCATTTCTTGATTGTGTTTTACACGTAGAATTCTACTCGTAAAGTATGTTTCAGTTT |       |       |       |       |       |             |
|                                                     | (1)     | -----                                                                          |       |       |       |       |       |             |
|                                                     |         | Section 921                                                                    |       |       |       |       |       |             |
| Autographa californica nucleopolyhedrovirus NC 0... | (70841) | 70841                                                                          | 70851 | 70862 | 70873 | 70884 | 70895 | 70906 70917 |
|                                                     | (70841) | AAAAAACAAATGACATCATTTTACAGATGACATCATTTCTTGATTATGTTTTACAAGTAGAATTCTACTCGTAAAGC  |       |       |       |       |       |             |
|                                                     | (1)     | -----                                                                          |       |       |       |       |       |             |
|                                                     |         | Section 922                                                                    |       |       |       |       |       |             |
| Autographa californica nucleopolyhedrovirus NC 0... | (70918) | 70918                                                                          | 70928 | 70939 | 70950 | 70961 | 70972 | 70983 70994 |
|                                                     | (70918) | AAGTTTAGTTTTTAAAAAACAAATGACATCATCTCTTGATTATGTTTTACAAGTAGAATTCTACTCGTAAAGCGAGTT |       |       |       |       |       |             |
|                                                     | (1)     | -----                                                                          |       |       |       |       |       |             |
|                                                     |         | Section 923                                                                    |       |       |       |       |       |             |
| Autographa californica nucleopolyhedrovirus NC 0... | (70995) | 70995                                                                          | 71005 | 71016 | 71027 | 71038 | 71049 | 71060 71071 |
|                                                     | (70995) | TAGTTTTGAAAAACAAATGACATCATCTCTTGATTATGTTTTACAAGTAGAATTCTACTCGTAAAGCGAGTTTAGTT  |       |       |       |       |       |             |
|                                                     | (1)     | -----                                                                          |       |       |       |       |       |             |
|                                                     |         | Section 924                                                                    |       |       |       |       |       |             |
| Autographa californica nucleopolyhedrovirus NC 0... | (71072) | 71072                                                                          | 71082 | 71093 | 71104 | 71115 | 71126 | 71137 71148 |
|                                                     | (71072) | TTCAAAAACAAATGACATCATCCCTTGATCATGCGTTACAAGTAGAATTCTACTCGTAAAGCGAGTTGAATTTTGAT  |       |       |       |       |       |             |
|                                                     | (1)     | -----                                                                          |       |       |       |       |       |             |

## SARS-CoV-2 &amp; Autographa californica nucleopolyhedrovirus.apr

|                                                     |         |                                                                                 |       |       |       |       |       |       |       |
|-----------------------------------------------------|---------|---------------------------------------------------------------------------------|-------|-------|-------|-------|-------|-------|-------|
|                                                     |         | Section 925                                                                     |       |       |       |       |       |       |       |
| Autographa californica nucleopolyhedrovirus NC 0... | (71149) | 71149                                                                           | 71159 | 71170 | 71181 | 71192 | 71203 | 71214 | 71225 |
|                                                     | (71149) | TACAAATATTTTGTATGATAGCAAGTATAAATAACCGCACAAAGTTAAATTTTTCATTTACTTGTCAACCATGT      |       |       |       |       |       |       |       |
|                                                     | (1)     | -----                                                                           |       |       |       |       |       |       |       |
|                                                     |         | Section 926                                                                     |       |       |       |       |       |       |       |
| Autographa californica nucleopolyhedrovirus NC 0... | (71226) | 71226                                                                           | 71236 | 71247 | 71258 | 71269 | 71280 | 71291 | 71302 |
|                                                     | (71226) | TTCGAATATACCCTAATAACACAACACTGTGCCCGGTTGTTTAGTGGGTGACATTATTCAAGTTCGTTATAAAGATGTA |       |       |       |       |       |       |       |
|                                                     | (1)     | -----                                                                           |       |       |       |       |       |       |       |
|                                                     |         | Section 927                                                                     |       |       |       |       |       |       |       |
| Autographa californica nucleopolyhedrovirus NC 0... | (71303) | 71303                                                                           | 71313 | 71324 | 71335 | 71346 | 71357 | 71368 | 71379 |
|                                                     | (71303) | TCACATATTCGCTTTTGTGTCAGATTATTTATCTTTGATGCCTAACGTTGCGATTGTAAACGAATATGGACCTAACAA  |       |       |       |       |       |       |       |
|                                                     | (1)     | -----                                                                           |       |       |       |       |       |       |       |
|                                                     |         | Section 928                                                                     |       |       |       |       |       |       |       |
| Autographa californica nucleopolyhedrovirus NC 0... | (71380) | 71380                                                                           | 71390 | 71401 | 71412 | 71423 | 71434 | 71445 | 71456 |
|                                                     | (71380) | CCAGTTAGTAATAAAACGCAAAAACAAATCGCTGAAAAGCTTGCAAGATTTGTGTCTGGACAAAATAGCCGTTTCGC   |       |       |       |       |       |       |       |
|                                                     | (1)     | -----                                                                           |       |       |       |       |       |       |       |
|                                                     |         | Section 929                                                                     |       |       |       |       |       |       |       |
| Autographa californica nucleopolyhedrovirus NC 0... | (71457) | 71457                                                                           | 71467 | 71478 | 71489 | 71500 | 71511 | 71522 | 71533 |
|                                                     | (71457) | TCAAGAAACCTTTTCGTCAGTTAAATCGTTAAATGCTGTTTGTGTTGATGCGAGACATTATATTTTCGCTGGGTTTA   |       |       |       |       |       |       |       |
|                                                     | (1)     | -----                                                                           |       |       |       |       |       |       |       |
|                                                     |         | Section 930                                                                     |       |       |       |       |       |       |       |
| Autographa californica nucleopolyhedrovirus NC 0... | (71534) | 71534                                                                           | 71544 | 71555 | 71566 | 71577 | 71588 | 71599 | 71610 |
|                                                     | (71534) | CCAATTATTTTAAATCCGGCTTTGCTACAAAGAAAAGTGCCGCAGCGCAGCGTGGGATATTTTCATGAATTCAAAATT  |       |       |       |       |       |       |       |
|                                                     | (1)     | -----                                                                           |       |       |       |       |       |       |       |
|                                                     |         | Section 931                                                                     |       |       |       |       |       |       |       |
| Autographa californica nucleopolyhedrovirus NC 0... | (71611) | 71611                                                                           | 71621 | 71632 | 71643 | 71654 | 71665 | 71676 | 71687 |
|                                                     | (71611) | GGAAAGGTTTGCCAATTGTGATCGGGGTCATGTCGTTGAAGAGAAACAATTGCAGAGTAATTTGTATATAGATTATT   |       |       |       |       |       |       |       |
|                                                     | (1)     | -----                                                                           |       |       |       |       |       |       |       |

|                                                     |         |                                                                                |       |       |       |       |       |       |       |
|-----------------------------------------------------|---------|--------------------------------------------------------------------------------|-------|-------|-------|-------|-------|-------|-------|
|                                                     |         | Section 932                                                                    |       |       |       |       |       |       |       |
| Autographa californica nucleopolyhedrovirus NC 0... | (71688) | 71688                                                                          | 71698 | 71709 | 71720 | 71731 | 71742 | 71753 | 71764 |
|                                                     | (71688) | TTTGTATGATTTGTGGTTTAAATGTTTTTAAATAAAAAGAATAACAATTTACACATTGTTTTATTACATGGATAATG  |       |       |       |       |       |       |       |
|                                                     | (1)     | -----                                                                          |       |       |       |       |       |       |       |
|                                                     |         | Section 933                                                                    |       |       |       |       |       |       |       |
| Autographa californica nucleopolyhedrovirus NC 0... | (71765) | 71765                                                                          | 71775 | 71786 | 71797 | 71808 | 71819 | 71830 | 71841 |
|                                                     | (71765) | TTGTTTGTGTTGACATTAAAGGTTATCATGGTGCAATGATTAATAATAAAACAATATTATGACATTATTTTCCTGTTA |       |       |       |       |       |       |       |
|                                                     | (1)     | -----                                                                          |       |       |       |       |       |       |       |
|                                                     |         | Section 934                                                                    |       |       |       |       |       |       |       |
| Autographa californica nucleopolyhedrovirus NC 0... | (71842) | 71842                                                                          | 71852 | 71863 | 71874 | 71885 | 71896 | 71907 | 71918 |
|                                                     | (71842) | TTTTACAATATAAAATCACACCAATTGTGCAAAGTTTTATTATTTGTTTGTGCGACGGTCGAGGGGTCAGCGGCGTGT |       |       |       |       |       |       |       |
|                                                     | (1)     | -----                                                                          |       |       |       |       |       |       |       |
|                                                     |         | Section 935                                                                    |       |       |       |       |       |       |       |
| Autographa californica nucleopolyhedrovirus NC 0... | (71919) | 71919                                                                          | 71929 | 71940 | 71951 | 71962 | 71973 | 71984 | 71995 |
|                                                     | (71919) | GCAACAATAAAAAACATGAAGCTGTTAACAATTTTGATTTTATTTTATTCATTTTTTATGAATTTGCAAGCGCTACC  |       |       |       |       |       |       |       |
|                                                     | (1)     | -----                                                                          |       |       |       |       |       |       |       |
|                                                     |         | Section 936                                                                    |       |       |       |       |       |       |       |
| Autographa californica nucleopolyhedrovirus NC 0... | (71996) | 71996                                                                          | 72006 | 72017 | 72028 | 72039 | 72050 | 72061 | 72072 |
|                                                     | (71996) | AGATTACCATCAAGCAAATAGGTGTGTGTTGCTGGGAACCTCGCATTGGATGGAACGATGACAATAGCCAAGATCCCA |       |       |       |       |       |       |       |
|                                                     | (1)     | -----                                                                          |       |       |       |       |       |       |       |
|                                                     |         | Section 937                                                                    |       |       |       |       |       |       |       |
| Autographa californica nucleopolyhedrovirus NC 0... | (72073) | 72073                                                                          | 72083 | 72094 | 72105 | 72116 | 72127 | 72138 | 72149 |
|                                                     | (72073) | ACGTATATTGGAAATGGTGTAAATAAAAGTGAATATATTTTTATAAAATTTTTATTTAAATTTCCAAGTAATCC     |       |       |       |       |       |       |       |
|                                                     | (1)     | -----                                                                          |       |       |       |       |       |       |       |
|                                                     |         | Section 938                                                                    |       |       |       |       |       |       |       |
| Autographa californica nucleopolyhedrovirus NC 0... | (72150) | 72150                                                                          | 72160 | 72171 | 72182 | 72193 | 72204 | 72215 | 72226 |
|                                                     | (72150) | CTGCAAACATTAAACACTGTAGGTATTTTTAAATCTTGCCACATGCGAACAACGCACGGCCTGTCGTCGAACACCGC  |       |       |       |       |       |       |       |
|                                                     | (1)     | -----                                                                          |       |       |       |       |       |       |       |

|                                                     |         |                                                                                 |       |       |       |       |       |       |       |
|-----------------------------------------------------|---------|---------------------------------------------------------------------------------|-------|-------|-------|-------|-------|-------|-------|
|                                                     |         | Section 939                                                                     |       |       |       |       |       |       |       |
| Autographa californica nucleopolyhedrovirus NC 0... | (72227) | 72227                                                                           | 72237 | 72248 | 72259 | 72270 | 72281 | 72292 | 72303 |
|                                                     | (72227) | TATTACATTATATTTTCCTCTGATATAGTTGTAAACAATTTTAATTTTAATAAATAATCTTTACAAGTATCGTCTG    |       |       |       |       |       |       |       |
|                                                     | (1)     | -----                                                                           |       |       |       |       |       |       |       |
|                                                     |         | Section 940                                                                     |       |       |       |       |       |       |       |
| Autographa californica nucleopolyhedrovirus NC 0... | (72304) | 72304                                                                           | 72314 | 72325 | 72336 | 72347 | 72358 | 72369 | 72380 |
|                                                     | (72304) | AAGGCCTCATAAACAAATTTATATGATTTAATATCAAAATACTTTTCAATCCAGTTTCGAGTGGGCTGTTTCACAAATT |       |       |       |       |       |       |       |
|                                                     | (1)     | -----                                                                           |       |       |       |       |       |       |       |
|                                                     |         | Section 941                                                                     |       |       |       |       |       |       |       |
| Autographa californica nucleopolyhedrovirus NC 0... | (72381) | 72381                                                                           | 72391 | 72402 | 72413 | 72424 | 72435 | 72446 | 72457 |
|                                                     | (72381) | ACGCTTCTCCCGCTCATAAACACGATAATTGCGTCGTGGCAATTTGCCAAATACTTAACGCAAGTAATAACGTCTAA   |       |       |       |       |       |       |       |
|                                                     | (1)     | -----                                                                           |       |       |       |       |       |       |       |
|                                                     |         | Section 942                                                                     |       |       |       |       |       |       |       |
| Autographa californica nucleopolyhedrovirus NC 0... | (72458) | 72458                                                                           | 72468 | 72479 | 72490 | 72501 | 72512 | 72523 | 72534 |
|                                                     | (72458) | GCGGGCTTCATCTTGAGCAACTCTATTATCAAAATCATAAACGATCTATTTGTGGGCAAAGCTACTGTACCGTCTA    |       |       |       |       |       |       |       |
|                                                     | (1)     | -----                                                                           |       |       |       |       |       |       |       |
|                                                     |         | Section 943                                                                     |       |       |       |       |       |       |       |
| Autographa californica nucleopolyhedrovirus NC 0... | (72535) | 72535                                                                           | 72545 | 72556 | 72567 | 72578 | 72589 | 72600 | 72611 |
|                                                     | (72535) | AATCACATAATACAGCGCGGGGAAATTTGTCGCCGACAGGAACGTAATATTCGAAATTATTTACCTTTAGAACTTT    |       |       |       |       |       |       |       |
|                                                     | (1)     | -----                                                                           |       |       |       |       |       |       |       |
|                                                     |         | Section 944                                                                     |       |       |       |       |       |       |       |
| Autographa californica nucleopolyhedrovirus NC 0... | (72612) | 72612                                                                           | 72622 | 72633 | 72644 | 72655 | 72666 | 72677 | 72688 |
|                                                     | (72612) | TTATATTGCTTTTTAATAGTTTCTGGATTTAATGGAAATTTATCAGAGCGTTTATAATTGCGTTCAAGAGCCGTTTC   |       |       |       |       |       |       |       |
|                                                     | (1)     | -----                                                                           |       |       |       |       |       |       |       |
|                                                     |         | Section 945                                                                     |       |       |       |       |       |       |       |
| Autographa californica nucleopolyhedrovirus NC 0... | (72689) | 72689                                                                           | 72699 | 72710 | 72721 | 72732 | 72743 | 72754 | 72765 |
|                                                     | (72689) | CAAAGAAACGTCCATCAAACGCGTTAAAAAATGGTAATTATGCGTTGCGGCCATTTTTTGCCACATGTCCACCGATT   |       |       |       |       |       |       |       |
|                                                     | (1)     | -----                                                                           |       |       |       |       |       |       |       |

## SARS-CoV-2 &amp; Autographa californica nucleopolyhedrovirus.apr

|                                                     |         |                                                                                |       |       |       |       |       |       |       |
|-----------------------------------------------------|---------|--------------------------------------------------------------------------------|-------|-------|-------|-------|-------|-------|-------|
| Section 946                                         |         |                                                                                |       |       |       |       |       |       |       |
| Autographa californica nucleopolyhedrovirus NC 0... | (72766) | 72766                                                                          | 72776 | 72787 | 72798 | 72809 | 72820 | 72831 | 72842 |
|                                                     | (72766) | GAGTGTTCAAATTAGTGTGCTGACAACCACGTTGGCACCACATTTTGCGGCTTTTAAAACTGTTCAATGCACATT    |       |       |       |       |       |       |       |
|                                                     | (1)     | -----                                                                          |       |       |       |       |       |       |       |
| Section 947                                         |         |                                                                                |       |       |       |       |       |       |       |
| Autographa californica nucleopolyhedrovirus NC 0... | (72843) | 72843                                                                          | 72853 | 72864 | 72875 | 72886 | 72897 | 72908 | 72919 |
|                                                     | (72843) | TTGGTAATTTGTTCTTCTTTAGTTTGTCTACATTTCCGCGATTGGTTATAGAAAGCGTTCAGTTTTGTATAATCGCC  |       |       |       |       |       |       |       |
|                                                     | (1)     | -----                                                                          |       |       |       |       |       |       |       |
| Section 948                                         |         |                                                                                |       |       |       |       |       |       |       |
| Autographa californica nucleopolyhedrovirus NC 0... | (72920) | 72920                                                                          | 72930 | 72941 | 72952 | 72963 | 72974 | 72985 | 72996 |
|                                                     | (72920) | GTTTAAAAACAACCTTAACGCGCACGTCGTCTCTGTTGATTTCTGTATAGCCTTTTAACTTTTGGCATACTGCTTT   |       |       |       |       |       |       |       |
|                                                     | (1)     | -----                                                                          |       |       |       |       |       |       |       |
| Section 949                                         |         |                                                                                |       |       |       |       |       |       |       |
| Autographa californica nucleopolyhedrovirus NC 0... | (72997) | 72997                                                                          | 73007 | 73018 | 73029 | 73040 | 73051 | 73062 | 73073 |
|                                                     | (72997) | TGCCCCGAACCCGAAATGCCTATCAACACCAACAATTGTTTTGAAGAAGGCAATTTAATTGTTGGAGCAAGTTTATTA |       |       |       |       |       |       |       |
|                                                     | (1)     | -----                                                                          |       |       |       |       |       |       |       |
| Section 950                                         |         |                                                                                |       |       |       |       |       |       |       |
| Autographa californica nucleopolyhedrovirus NC 0... | (73074) | 73074                                                                          | 73084 | 73095 | 73106 | 73117 | 73128 | 73139 | 73150 |
|                                                     | (73074) | TTTAATGCCTGCTTAGTCGATACAAATTTTATAATATTTTTGATCATTTTAATTTTTTCAGGCTCGGTTAATTTTAA  |       |       |       |       |       |       |       |
|                                                     | (1)     | -----                                                                          |       |       |       |       |       |       |       |
| Section 951                                         |         |                                                                                |       |       |       |       |       |       |       |
| Autographa californica nucleopolyhedrovirus NC 0... | (73151) | 73151                                                                          | 73161 | 73172 | 73183 | 73194 | 73205 | 73216 | 73227 |
|                                                     | (73151) | AAATTCGCTCTCCACATCGATCGTTTGTGCTTTACGACATCTGTACGCTAAACATTTCCACGGCAAAGTTTGACCA   |       |       |       |       |       |       |       |
|                                                     | (1)     | -----                                                                          |       |       |       |       |       |       |       |
| Section 952                                         |         |                                                                                |       |       |       |       |       |       |       |
| Autographa californica nucleopolyhedrovirus NC 0... | (73228) | 73228                                                                          | 73238 | 73249 | 73260 | 73271 | 73282 | 73293 | 73304 |
|                                                     | (73228) | GTTTCGTTGAAACGCTGTTGATTCAAAGTCAAACCCGACACCATAATATTTATTGTAGACTCGTTGGTGAACGTGTTT |       |       |       |       |       |       |       |
|                                                     | (1)     | -----                                                                          |       |       |       |       |       |       |       |



SARS-CoV-2 & Autographa californica nucleopolyhedrovirus.apr

|                                                     |         |                                                                                   |       |       |       |       |       |             |
|-----------------------------------------------------|---------|-----------------------------------------------------------------------------------|-------|-------|-------|-------|-------|-------------|
|                                                     |         | Section 953                                                                       |       |       |       |       |       |             |
| Autographa californica nucleopolyhedrovirus NC 0... | (73305) | 73305                                                                             | 73315 | 73326 | 73337 | 73348 | 73359 | 73370 73381 |
|                                                     | (73305) | CTAGCATCAACGTACGGTTTAAATGACACTTTTAAATGCGGGAAAAGAGCTAGAAAGTCATCGTGTTTCGCCATTTAT    |       |       |       |       |       |             |
| SARS-CoV-2 NC_045512.2                              | (1)     | -----                                                                             |       |       |       |       |       |             |
|                                                     |         | Section 954                                                                       |       |       |       |       |       |             |
| Autographa californica nucleopolyhedrovirus NC 0... | (73382) | 73382                                                                             | 73392 | 73403 | 73414 | 73425 | 73436 | 73447 73458 |
|                                                     | (73382) | AACAAAGCTGCGCCAATTTAGTAGGATTTTCAGCACGGCTCTGATTTTTGTGCATGTTCAAATACACGTCGCTTTTAA    |       |       |       |       |       |             |
| SARS-CoV-2 NC_045512.2                              | (1)     | -----                                                                             |       |       |       |       |       |             |
|                                                     |         | Section 955                                                                       |       |       |       |       |       |             |
| Autographa californica nucleopolyhedrovirus NC 0... | (73459) | 73459                                                                             | 73469 | 73480 | 73491 | 73502 | 73513 | 73524 73535 |
|                                                     | (73459) | TCTTGCATAGTGGCGCGTGTGTTTATCTAATACTCTTCCAAATTTTCAACGGGGC-CGC GTGTTC                |       |       |       |       |       |             |
| SARS-CoV-2 NC_045512.2                              | (1)     | -----ATTAAAGGTTTATACC TTCCAGGTAAACAAACCAAG-----TTTCGATCTCTGTAGATCTGTTC TC         |       |       |       |       |       |             |
|                                                     |         | Section 956                                                                       |       |       |       |       |       |             |
| Autographa californica nucleopolyhedrovirus NC 0... | (73536) | 73536                                                                             | 73546 | 73557 | 73568 | 73579 | 73590 | 73601 73612 |
|                                                     | (73535) | GACACATTCTTGCACAGACGTAAACTCTGTAACATTGGGGTATTTCGCAACACGGCAAATTGGAA CAGTAAAAATAAT   |       |       |       |       |       |             |
| SARS-CoV-2 NC_045512.2                              | (67)    | TAAACGAACTTT---AAATCTGTGTGCTGTCACTCGGCTGCATGCTTAGTGCACT---CACG CAGTATAATTAAT      |       |       |       |       |       |             |
|                                                     |         | Section 957                                                                       |       |       |       |       |       |             |
| Autographa californica nucleopolyhedrovirus NC 0... | (73613) | 73613                                                                             | 73623 | 73634 | 73645 | 73656 | 73667 | 73678 73689 |
|                                                     | (73612) | CGCCCGTTTCGTGTCTGCTTGCAAATACCAACCGTTGGCTGTTCTCGTAAACGGTTACAAATCTGTGTGT            |       |       |       |       |       |             |
| SARS-CoV-2 NC_045512.2                              | (138)   | AACTAA TTACTGTCTGTTGACAGGACACG--AGTA ACTCGTCTAT----CTTC TGCAGGCTGC-TTACGGTTTCGTCC |       |       |       |       |       |             |
|                                                     |         | Section 958                                                                       |       |       |       |       |       |             |
| Autographa californica nucleopolyhedrovirus NC 0... | (73690) | 73690                                                                             | 73700 | 73711 | 73722 | 73733 | 73744 | 73755 73766 |
|                                                     | (73689) | TTGCTTGTTAACTCAAACATGTGAGTGGACGGCAGTCTAAATATTTCGTTACACAACGCTTGA AATTGATTGTGGGC    |       |       |       |       |       |             |
| SARS-CoV-2 NC_045512.2                              | (208)   | GTG-T-TGCAGC---CGATCATC-AGCACATCTAGG-----TTTC-GTCCGGGT---GTGACCGAAAGGTAAAGATGG    |       |       |       |       |       |             |
|                                                     |         | Section 959                                                                       |       |       |       |       |       |             |
| Autographa californica nucleopolyhedrovirus NC 0... | (73767) | 73767                                                                             | 73777 | 73788 | 73799 | 73810 | 73821 | 73832 73843 |
|                                                     | (73766) | CTCGTCAAGTTGAAGAGCTTGCAAAAC TAAACGTTTAAACGTCAAGTCTGACACGCAAAAGTTTCTGCAAAAGCAC     |       |       |       |       |       |             |
| SARS-CoV-2 NC_045512.2                              | (270)   | AG-AGCCT--TG TCCC-TGGTTTC AACG-AG-AAAACACACGTCCAACTCAGTTTGCCTGT TTTACAGGTTTCGCGAC |       |       |       |       |       |             |

SARS-CoV-2 & Autographa californica nucleopolyhedrovirus.apr

|                                                     |         |             |          |       |              |           |          |          |             |
|-----------------------------------------------------|---------|-------------|----------|-------|--------------|-----------|----------|----------|-------------|
|                                                     |         | Section 960 |          |       |              |           |          |          |             |
| Autographa californica nucleopolyhedrovirus NC 0... | (73844) | 73844       | 73854    | 73865 | 73876        | 73887     | 73898    | 73909    | 73920       |
|                                                     | (73843) | TTCCTCG     | GGTGC    | TGGCA | TGCCATT      | CGCCGT    | TGTA     | CTTG     | TAGATT      |
|                                                     | (341)   | GTGCTCG     | T-ACG    | TGGCA | TGGCA        | CTCCGT    | -GAGGAG  | GTCTT    | ATCAGAGGC   |
|                                                     |         | Section 961 |          |       |              |           |          |          |             |
| Autographa californica nucleopolyhedrovirus NC 0... | (73921) | 73921       | 73931    | 73942 | 73953        | 73964     | 73975    | 73986    | 73997       |
|                                                     | (73920) | TAAAAATTC   | TCC      | TTCG  | ATTG         | GAA       | CA       | GTTT     | GTGAT       |
|                                                     | (414)   | CTTGTGGCT   | TAG      | TAGA  | AGTT         | GAAA      | AGGC     | GT       | TTTCCTCAACT |
|                                                     |         | Section 962 |          |       |              |           |          |          |             |
| Autographa californica nucleopolyhedrovirus NC 0... | (73998) | 73998       | 74008    | 74019 | 74030        | 74041     | 74052    | 74063    | 74074       |
|                                                     | (73997) | AAAGAA      | ACGA     | TCGAA | AGAACG       | CGACACAA  | CGGCG    | TAC      | GTGCG       |
|                                                     | (486)   | ---CGG      | ATG      | TCGAA | CTGCAC       | CTCATGGT  | CATGT    | TATG     | TTGAGCTGGT  |
|                                                     |         | Section 963 |          |       |              |           |          |          |             |
| Autographa californica nucleopolyhedrovirus NC 0... | (74075) | 74075       | 74085    | 74096 | 74107        | 74118     | 74129    | 74140    | 74151       |
|                                                     | (74074) | CAGGAT      | TGAT     | TCTC  | GATCGCG      | TTCAAACGA | TT       | CGTAA    | TAA         |
|                                                     | (557)   | GGTCG       | TAG      | TGGT  | GAGACAC      | TTGGTGTCC | TT       | GTCCC    | TATG        |
|                                                     |         | Section 964 |          |       |              |           |          |          |             |
| Autographa californica nucleopolyhedrovirus NC 0... | (74152) | 74152       | 74162    | 74173 | 74184        | 74195     | 74206    | 74217    | 74228       |
|                                                     | (74151) | ACT         | TTAA     | ACTT  | GTGC         | AAAGATT   | TT       | TCACTCCG | CGT         |
|                                                     | (615)   | C--         | TTA      | CCGCA | -AGGTTCTTC-- | TT        | CGTAAGAA | CGT      | AAATA       |
|                                                     |         | Section 965 |          |       |              |           |          |          |             |
| Autographa californica nucleopolyhedrovirus NC 0... | (74229) | 74229       | 74239    | 74250 | 74261        | 74272     | 74283    | 74294    | 74305       |
|                                                     | (74228) | ATA         | ATGC     | CATAC | CAAT         | TGCTAACT  | GTCT     | ATTA     | TAT         |
|                                                     | (682)   | TCT         | AA-A--GT | CAT   | TTGACTTAG    | CGC       | -ACG     | AGCT     | TGGCACTGAT  |
|                                                     |         | Section 966 |          |       |              |           |          |          |             |
| Autographa californica nucleopolyhedrovirus NC 0... | (74306) | 74306       | 74316    | 74327 | 74338        | 74349     | 74360    | 74371    | 74382       |
|                                                     | (74305) | ATAT        | ATA      | AAC   | GCAA         | TGT       | AAC      | AGTTTT   | TGCTAGT     |
|                                                     | (755)   | AAAC        | ATAG     | CA    | GTGG         | TGT       | TAC      | ---CCG   | TGA         |

SARS-CoV-2 & Autographa californica nucleopolyhedrovirus.apr

|                                                     |         |             |             |              |           |             |          |                   |                                                    |
|-----------------------------------------------------|---------|-------------|-------------|--------------|-----------|-------------|----------|-------------------|----------------------------------------------------|
|                                                     |         | Section 967 |             |              |           |             |          |                   |                                                    |
| Autographa californica nucleopolyhedrovirus NC 0... | (74383) | 74383       | 74393       | 74404        | 74415     | 74426       | 74437    | 74448             | 74459                                              |
|                                                     | (74378) | ATAA        | TAATAAAAT   | GATAT        | TATGA     | AAT         | GCT      | TTGGGCTTGCAACC    | TCAAAGTAAATTGAAAATTATTGCACATAAAATA                 |
|                                                     | (829)   | CAACT       | T--CTGTG    | G-CCC        | TG---     | ATG         | GCT      | ACCCT---          | CTGAGTGCATTAAAGACCTTCTAGCACGTGCTGGTAAAG            |
|                                                     |         | Section 968 |             |              |           |             |          |                   |                                                    |
| Autographa californica nucleopolyhedrovirus NC 0... | (74460) | 74460       | 74470       | 74481        | 74492     | 74503       | 74514    | 74525             | 74536                                              |
|                                                     | (74455) | CTAG        | AAAAAT      | GTG          | ACGCGT    | TAC         | ACGCGT   | TTCAAGGGCGTAAAGGC | GATCAAGAATGAACTAAAAACATACAA                        |
|                                                     | (897)   | CTTC        | ATGC        | ACTTTGT      | CCGA      | AC          | AAC      | TGGAC             | TTTATTTGACACTA--AGAGGGGTGTATACTGCTGCCTGTAAACATGAGC |
|                                                     |         | Section 969 |             |              |           |             |          |                   |                                                    |
| Autographa californica nucleopolyhedrovirus NC 0... | (74537) | 74537       | 74547       | 74558        | 74569     | 74580       | 74591    | 74602             | 74613                                              |
|                                                     | (74532) | TCTT        | ACGTTGCAACA | AT           | ACAACGA   | GCGCTC      | AA       | TCAGTG            | GCTTTAAACGATAGCCGATGGCGCGACACAAATAATT              |
|                                                     | (972)   | ATGA        | AAT         | TGCTTGGT     | AC        | AC          | GGAAC    | GTCTGAA           | AGAG--GTATGAATTGCAAGACCTTT----TGAAATTAAATTG        |
|                                                     |         | Section 970 |             |              |           |             |          |                   |                                                    |
| Autographa californica nucleopolyhedrovirus NC 0... | (74614) | 74614       | 74624       | 74635        | 74646     | 74657       | 74668    | 74679             | 74690                                              |
|                                                     | (74609) | GGC         | ATCACGAT    | TATTGA       | AGAAGGTG  | TG          | AAAAAT   | AAACAAG           | AGACATATATATAGAGTTAATTTTAATTCTAAACC                |
|                                                     | (1043)  | GCA         | AGAAAT      | TTGAC        | ACCTTC-AA | TG          | GG--GAA  | TGTCCA            | AAATTTGTAT-----TTCCC                               |
|                                                     |         | Section 971 |             |              |           |             |          |                   |                                                    |
| Autographa californica nucleopolyhedrovirus NC 0... | (74691) | 74691       | 74701       | 74712        | 74723     | 74734       | 74745    | 74756             | 74767                                              |
|                                                     | (74686) | GAAAT       | TGAAGAAT    | ATTAT        | TAC       | ATTAAAGT    | A        | GAA               | TGTTATGTAAACAGTTAATTAATCTACATTATTGTAAACATTG        |
|                                                     | (1111)  | GACTA       | TTCA        | ACCA         | AGGG      | TTGA        | AAG----  | AAA               | AGCTTGATGGCTTTATGGGTAGAATTTC-GAT---CTGTCTATCC      |
|                                                     |         | Section 972 |             |              |           |             |          |                   |                                                    |
| Autographa californica nucleopolyhedrovirus NC 0... | (74768) | 74768       | 74778       | 74789        | 74800     | 74811       | 74822    | 74833             | 74844                                              |
|                                                     | (74763) | TGGT        | AATAGTGG    | CGTTG        | GTTATAC   | ATTTA       | TATGATTG | TAAATGT           | TGTGTACTCGTTTGTAAATAAATTTTGTGTTT                   |
|                                                     | (1180)  | AGT         | TGCGT-CAC   | CAAAT        | GAATGCA   | ACCA        | ATGTGCCT | TTCAACT           | -----CTCATGAAGTGTGATCAT-TGTGGT                     |
|                                                     |         | Section 973 |             |              |           |             |          |                   |                                                    |
| Autographa californica nucleopolyhedrovirus NC 0... | (74845) | 74845       | 74855       | 74866        | 74877     | 74888       | 74899    | 74910             | 74921                                              |
|                                                     | (74840) | ATC         | AA          | TTCAATATTTTT | ATTT      | GATAAAACCTT | ATTTT    | CGCTA             | CTCAATTTGGCGTTTTTA                                 |
|                                                     | (1247)  | G--         | AA          | ACTTCATGGCAG | ACGG      | C-----      | G        | ATTTT             | GTTAAAGCCACTT-----GC                               |

SARS-CoV-2 & Autographa californica nucleopolyhedrovirus.apr

|                                                       |         |             |       |               |            |          |          |           |          |          |        |         |            |             |          |          |          |         |      |          |        |       |        |    |      |        |        |
|-------------------------------------------------------|---------|-------------|-------|---------------|------------|----------|----------|-----------|----------|----------|--------|---------|------------|-------------|----------|----------|----------|---------|------|----------|--------|-------|--------|----|------|--------|--------|
|                                                       |         | Section 974 |       |               |            |          |          |           |          |          |        |         |            |             |          |          |          |         |      |          |        |       |        |    |      |        |        |
| Autographa californica nucleopolydnavirus NC 045512.2 | (74922) | 74922       | 74932 | 74943         | 74954      | 74965    | 74976    | 74987     | 74998    |          |        |         |            |             |          |          |          |         |      |          |        |       |        |    |      |        |        |
|                                                       | (74917) | ATCGT       | CATTG | AGC           | GATTT      | TAG      | CGC      | CTT       | TT       | CAGT     | TGTAAT | TTCGTTT | CAGTTGCAAT | TCTTTAA     | AAG      | ATTTA    | TGCATG   | T       |      |          |        |       |        |    |      |        |        |
|                                                       | (1306)  | GAAT        | TGACT | AAA           | GAGG       | TGC      | CAC      | TAC       | TT       | GT       | GTTACT | TA----  | CCCCAAATGC | TGTTGTT     | AAA      | ATTTA    | -----    | T       |      |          |        |       |        |    |      |        |        |
|                                                       |         | Section 975 |       |               |            |          |          |           |          |          |        |         |            |             |          |          |          |         |      |          |        |       |        |    |      |        |        |
| Autographa californica nucleopolydnavirus NC 045512.2 | (74999) | 74999       | 75009 | 75020         | 75031      | 75042    | 75053    | 75064     | 75075    |          |        |         |            |             |          |          |          |         |      |          |        |       |        |    |      |        |        |
|                                                       | (74994) | TG          | TTGT  | AGTCGC        | TTTAATT    | TGTCTAA  | CTTTTC   | TTGC      | ATAGAA   | ACGCTTGT | TTGTT  | GT      | AATTTG     | TCTAAATCT   | A        | AT       |          |         |      |          |        |       |        |    |      |        |        |
|                                                       | (1373)  | --          | T     | GT            | CCAGCAT    | TG-----  | T        | CACAATT   | C        | AGAAG    | TAGG   | ACCTG   | AGCATAGTC  | TTGCC       | GA       | ATACCA   | T-----   | A       | TG   |          |        |       |        |    |      |        |        |
|                                                       |         | Section 976 |       |               |            |          |          |           |          |          |        |         |            |             |          |          |          |         |      |          |        |       |        |    |      |        |        |
| Autographa californica nucleopolydnavirus NC 045512.2 | (75076) | 75076       | 75086 | 75097         | 75108      | 75119    | 75130    | 75141     | 75152    |          |        |         |            |             |          |          |          |         |      |          |        |       |        |    |      |        |        |
|                                                       | (75071) | TG          | TTG   | TTAATGTTGAGC  | TG         | CGT      | TTGTTTCG | GCAATGTCT | ACCTG    | TAGTTTTT | TTAGT  | ATCGCT  | TGTG       | CTTCAGAC    | A        | G        |          |         |      |          |        |       |        |    |      |        |        |
|                                                       | (1434)  | AA          | TCT   | GGCTTGAAAACCA | TTCT       | T        | CGTAAG-  | G         | GTGGTCGC | ACTAT    | T----  | GCC     | TTT        | GG          | AGGCTG   | TGTGT    | TCTCTTAT | G       |      |          |        |       |        |    |      |        |        |
|                                                       |         | Section 977 |       |               |            |          |          |           |          |          |        |         |            |             |          |          |          |         |      |          |        |       |        |    |      |        |        |
| Autographa californica nucleopolydnavirus NC 045512.2 | (75153) | 75153       | 75163 | 75174         | 75185      | 75196    | 75207    | 75218     | 75229    |          |        |         |            |             |          |          |          |         |      |          |        |       |        |    |      |        |        |
|                                                       | (75148) | CATAG       | TG    | T             | CGT        | CGGC     | ATT      | TGCGT     | TG       | TTG      | T      | CTT     | CTG        | CGT         | ---C--   | GTCC     | AACAGAC  | TTTTTTT | CA   | AACA     | A      | CACAC | TG     | GC |      |        |        |
|                                                       | (1506)  | TTGGT       | TG    | C             | CA         | T        | AACA     | AGT       | T        | GTGCC    | T      | ATTG    | GG         | TT          | C        | CA       | CGT      | GCTAGC  | GCTA | ACATAGG  | TTG    | T     | AA     | C  | ATAC | AGGTGT | TG     |
|                                                       |         | Section 978 |       |               |            |          |          |           |          |          |        |         |            |             |          |          |          |         |      |          |        |       |        |    |      |        |        |
| Autographa californica nucleopolydnavirus NC 045512.2 | (75230) | 75230       | 75240 | 75251         | 75262      | 75273    | 75284    | 75295     | 75306    |          |        |         |            |             |          |          |          |         |      |          |        |       |        |    |      |        |        |
|                                                       | (75220) | CA          | AAG   | AGG           | CCG        | CATCAAAA | TTA      | GC        | GTTT     | ATT      | TTAT   | TTCC    | AT         | TGTG        | CGA      | CACTCGAC | GCGCTG   | CA      | TTTA | ATCA     | CATCCA |       |        |    |      |        |        |
|                                                       | (1583)  | GG          | A     | GA            | AGG        | TT       | C        | GAAGGTC   | TTA      | AT       | GACA   | ACC     | TT         | C           | TT       | GAA      | A        | TACT    | CC   | AA       | AAAG-- | A     | GAAAGT | CA | AC-- | ATCA   | ATATTG |
|                                                       |         | Section 979 |       |               |            |          |          |           |          |          |        |         |            |             |          |          |          |         |      |          |        |       |        |    |      |        |        |
| Autographa californica nucleopolydnavirus NC 045512.2 | (75307) | 75307       | 75317 | 75328         | 75339      | 75350    | 75361    | 75372     | 75383    |          |        |         |            |             |          |          |          |         |      |          |        |       |        |    |      |        |        |
|                                                       | (75297) | CAAC-       | GTT   | CCGTTTACGC    | TG         | TAA      | AC       | GT        | T        | GAAATG   | CAAAC  | TTT     | CAA        | CCTACACAAGG | GACATGGT | AC       | TTTT     | TTT     | T    | CG       |        |       |        |    |      |        |        |
|                                                       | (1656)  | TTGGT       | G     | ACT           | TTTAACTTAA | TG       | A        | GA        | -        | GAT      | ---CGC | CA      | T          | TTT         | TGG      | C        | ATCTTTT  | -       | TCT  | GCTTCC-- | AC     | AAG   | T      | GC | TTT  |        |        |
|                                                       |         | Section 980 |       |               |            |          |          |           |          |          |        |         |            |             |          |          |          |         |      |          |        |       |        |    |      |        |        |
| Autographa californica nucleopolydnavirus NC 045512.2 | (75384) | 75384       | 75394 | 75405         | 75416      | 75427    | 75438    | 75449     | 75460    |          |        |         |            |             |          |          |          |         |      |          |        |       |        |    |      |        |        |
|                                                       | (75373) | T           | TT    | TCT           | AA         | TCT      | TG       | CGT       | A        | TACACA   | T      | T       | G          | A           | C        | A        | T        | T       | G    | A        | T      | T     | G      | A  | T    | T      | G      |
|                                                       | (1726)  | T           | GT    | T             | G          | GA       | AA       | CTG       | T        | G        | AA     | AGG     | T--        | T           | T        | G        | A        | T       | T    | AA       | A      | G     | -      | C  | A    | T      | T      |

SARS-CoV-2 & Autographa californica nucleopolyhedrovirus.apr

|                                                     |         |                                |              |         |            |             |         |           |             |          |         |          |           |          |       |      |         |        |         |         |      |       |      |    |    |   |   |   |   |   |
|-----------------------------------------------------|---------|--------------------------------|--------------|---------|------------|-------------|---------|-----------|-------------|----------|---------|----------|-----------|----------|-------|------|---------|--------|---------|---------|------|-------|------|----|----|---|---|---|---|---|
|                                                     |         | Section 981                    |              |         |            |             |         |           |             |          |         |          |           |          |       |      |         |        |         |         |      |       |      |    |    |   |   |   |   |   |
| Autographa californica nucleopolyhedrovirus NC 0... | (75461) | 75461                          | 75471        | 75482   | 75493      | 75504       | 75515   | 75526     | 75537       |          |         |          |           |          |       |      |         |        |         |         |      |       |      |    |    |   |   |   |   |   |
|                                                     | (75450) | ATCTGTCTATTGGTT---GCAGAAA--TAA | TTTTTAATTTC  | TGCAACC | GAAA       | AACAATGTT   | G       | CAT       | TGCAAT      | T        |         |          |           |          |       |      |         |        |         |         |      |       |      |    |    |   |   |   |   |   |
|                                                     | (1794)  | AAGTTACAAAGGAAAAGCTAA          | AAAA         | GGTGCC  | TGGAAT     | ATTGG       | TGAACA- | GAAA      | TCAAT       | ACTGA    | G       | TCC      | TCTTTAT   | TGC      |       |      |         |        |         |         |      |       |      |    |    |   |   |   |   |   |
|                                                     |         | Section 982                    |              |         |            |             |         |           |             |          |         |          |           |          |       |      |         |        |         |         |      |       |      |    |    |   |   |   |   |   |
| Autographa californica nucleopolyhedrovirus NC 0... | (75538) | 75538                          | 75548        | 75559   | 75570      | 75581       | 75592   | 75603     | 75614       |          |         |          |           |          |       |      |         |        |         |         |      |       |      |    |    |   |   |   |   |   |
|                                                     | (75521) | ACAAACTCTCATTTTTTAGACG         | GCTATTCCTCCA | CCTGC   | TTCGCC     | TGCAACA     | CCAG    | GCGCAGGA  | CCTGCC      | ACTG     | G       | CCC      | G         |          |       |      |         |        |         |         |      |       |      |    |    |   |   |   |   |   |
|                                                     | (1870)  | ATTTGCATCAGAGGCTGCTC           | G            | TGT     | TGTACGAT   | CAATT       | TTC     | CCGCACT-  | CTT         | GA--A    | ACTG    | C        | TCAA-     | A        | ATT   | C    | TGT     | G      |         |         |      |       |      |    |    |   |   |   |   |   |
|                                                     |         | Section 983                    |              |         |            |             |         |           |             |          |         |          |           |          |       |      |         |        |         |         |      |       |      |    |    |   |   |   |   |   |
| Autographa californica nucleopolyhedrovirus NC 0... | (75615) | 75615                          | 75625        | 75636   | 75647      | 75658       | 75669   | 75680     | 75691       |          |         |          |           |          |       |      |         |        |         |         |      |       |      |    |    |   |   |   |   |   |
|                                                     | (75598) | CGCCAGAGTAGC                   | GTTAG        | GATT    | TGCTCTTGGA | TAAAGTCGT   | TGCGCA  | AAAAGTTG  | TTTCTGAATT  | GATTAT   | TTG     |          |           |          |       |      |         |        |         |         |      |       |      |    |    |   |   |   |   |   |
|                                                     | (1943)  | CGTGTTTTA--C-A                 | G            | AAG     | CCGC       | TATAACAATAC | TAGAT   | TGGAA     | TTTCAC      | A        | GT----  | A        | TTCA--    | CTGA     | G     | A    | C       | TCA    | TTG     |         |      |       |      |    |    |   |   |   |   |   |
|                                                     |         | Section 984                    |              |         |            |             |         |           |             |          |         |          |           |          |       |      |         |        |         |         |      |       |      |    |    |   |   |   |   |   |
| Autographa californica nucleopolyhedrovirus NC 0... | (75692) | 75692                          | 75702        | 75713   | 75724      | 75735       | 75746   | 75757     | 75768       |          |         |          |           |          |       |      |         |        |         |         |      |       |      |    |    |   |   |   |   |   |
|                                                     | (75675) | GTA                            | TCC          | CAAA    | ACAG       | CGGA        | ACGT    | TACG      | T           | GGG      | TAT     | TCTTCGT  | TAT       | CCGCTA   | AGC   | GTT  | CT      | GTCCAG | C       | T       | CAC  | G     | T    | G  | T  | G | T | G | C | G |
|                                                     | (2010)  | A--                            | TGG          | TATG    | ATGTT      | CAC-        | ATC     | T         | GAT         | TT       | GGC     | TACT     | TAACAATCT | AGTTGT   | AAT   | G    | GC      | CT     | ACATTA  | C       | AGGT | G     | T    | G  | T  | G | T | G | T | G |
|                                                     |         | Section 985                    |              |         |            |             |         |           |             |          |         |          |           |          |       |      |         |        |         |         |      |       |      |    |    |   |   |   |   |   |
| Autographa californica nucleopolyhedrovirus NC 0... | (75769) | 75769                          | 75779        | 75790   | 75801      | 75812       | 75823   | 75834     | 75845       |          |         |          |           |          |       |      |         |        |         |         |      |       |      |    |    |   |   |   |   |   |
|                                                     | (75752) | CTTCAAA                        | ATTTC        | AAAA    | CGTTT      | CTAATTTGC   | AAACGA  | TTGG      | TTGACTTCTCA | TAAATGTC | ACTG    | CTTCTTAT | CGGGTT    | G        |       |      |         |        |         |         |      |       |      |    |    |   |   |   |   |   |
|                                                     | (2084)  | CAGTTG                         | ACTTC        | G-CA    | ---G       | TGGCTAACTA  | ACAT    | -CTT      | GG-CA-----  | CTG      | TTTATGA | AAAA     | C-----    | TCAAACCC | G     |      |         |        |         |         |      |       |      |    |    |   |   |   |   |   |
|                                                     |         | Section 986                    |              |         |            |             |         |           |             |          |         |          |           |          |       |      |         |        |         |         |      |       |      |    |    |   |   |   |   |   |
| Autographa californica nucleopolyhedrovirus NC 0... | (75846) | 75846                          | 75856        | 75867   | 75878      | 75889       | 75900   | 75911     | 75922       |          |         |          |           |          |       |      |         |        |         |         |      |       |      |    |    |   |   |   |   |   |
|                                                     | (75829) | TACA                           | AACTCG       | GGGCC   | GTC        | G           | GGC     | ACAGACGCG | ACCAG       | ACCC     | GTTC    | GTCAA    | TTAT      | A        | C     | ACG  | TGGC    | G      | CAAT    | TT      | C    | T     | AAA  | CC | T  |   |   |   |   |   |
|                                                     | (2145)  | TCCTTGATT                      | GGCTTG       | AAG     | ---        | AGA         | AGTTT-  | AAGGA     | AGGT        | GTAGAG   | TTTC    | TTAG     | AG        | ACG      | GTTG  | GG   | AAAT    | TT     | G       | T       | T    | AA    | A    | T  |    |   |   |   |   |   |
|                                                     |         | Section 987                    |              |         |            |             |         |           |             |          |         |          |           |          |       |      |         |        |         |         |      |       |      |    |    |   |   |   |   |   |
| Autographa californica nucleopolyhedrovirus NC 0... | (75923) | 75923                          | 75933        | 75944   | 75955      | 75966       | 75977   | 75988     | 75999       |          |         |          |           |          |       |      |         |        |         |         |      |       |      |    |    |   |   |   |   |   |
|                                                     | (75906) | CAAT                           | TC           | CT      | CC         | GTGT        | CGAT    | T         | TGC         | AAGTA    | C       | TCG      | GG        | CGCTA    | CTGCG | CGT  | C       | GAAT   | CAAA    | TTTTGCA | AA   | AAATC | ---- | CA | CT | G |   |   |   |   |
|                                                     | (2218)  | TATC                           | TCAA         | CC      | TGTG       | CTTG        | TGAA    | ATTGT     | C           | GGT      | GG      | ACAAAT   | T-GT      | CAC      | CTGTG | CAAA | GGAAATT | AA     | GGAGAGT | GTT     | CAG  |       |      |    |    |   |   |   |   |   |

SARS-CoV-2 & Autographa californica nucleopolyhedrovirus.apr

|                                                     |         |                      |                      |                |               |           |              |              |          |             |                           |      |           |       |      |         |       |         |      |          |      |         |       |       |      |         |     |    |     |   |   |   |   |     |   |
|-----------------------------------------------------|---------|----------------------|----------------------|----------------|---------------|-----------|--------------|--------------|----------|-------------|---------------------------|------|-----------|-------|------|---------|-------|---------|------|----------|------|---------|-------|-------|------|---------|-----|----|-----|---|---|---|---|-----|---|
|                                                     |         |                      |                      |                |               |           |              |              |          | Section 988 |                           |      |           |       |      |         |       |         |      |          |      |         |       |       |      |         |     |    |     |   |   |   |   |     |   |
| Autographa californica nucleopolyhedrovirus NC 0... | (76000) | 76000                | 76010                | 76021          | 76032         | 76043     | 76054        | 76065        | 76076    |             |                           |      |           |       |      |         |       |         |      |          |      |         |       |       |      |         |     |    |     |   |   |   |   |     |   |
|                                                     | (75979) | TAATTGTTAAATAATTGA   | TCGCCAGCACCGCCT      | CGAAGCGCTCGGGC | GTTGGTCA      | CGTCAAA   | GAAACGCAATTC | GT           | C        |             |                           |      |           |       |      |         |       |         |      |          |      |         |       |       |      |         |     |    |     |   |   |   |   |     |   |
| SARS-CoV-2 NC_045512.2                              | (2294)  | ACATTCT--TTTAAGCTTGT | TAAATAAATTTTTTGG     | CTTTG-TGTG--CT | GACTCTAT      | CATTATT   | G            | GTGGAGCTAAAC | TT       |             |                           |      |           |       |      |         |       |         |      |          |      |         |       |       |      |         |     |    |     |   |   |   |   |     |   |
|                                                     |         |                      |                      |                |               |           |              |              |          | Section 989 |                           |      |           |       |      |         |       |         |      |          |      |         |       |       |      |         |     |    |     |   |   |   |   |     |   |
| Autographa californica nucleopolyhedrovirus NC 0... | (76077) | 76077                | 76087                | 76098          | 76109         | 76120     | 76131        | 76142        | 76153    |             |                           |      |           |       |      |         |       |         |      |          |      |         |       |       |      |         |     |    |     |   |   |   |   |     |   |
|                                                     | (76056) | TCGCGACACCCGCGAACA   | AAACGTGTT            | CGGGTTGTGGTG   | TCCAGAATGCTTT | TTTGTAGTT | GCGTAAACGC   | T            | GTGTA    |             |                           |      |           |       |      |         |       |         |      |          |      |         |       |       |      |         |     |    |     |   |   |   |   |     |   |
| SARS-CoV-2 NC_045512.2                              | (2366)  | AAAGCCT----TGA       | ATTTAGGTG            | AACATTTG       | T             | CACG      | CAC          | TC           | AAAGGGAT | T           | TACAGAAAGTGT-GTTAAATC---- |      |           |       |      |         |       |         |      |          |      |         |       |       |      |         |     |    |     |   |   |   |   |     |   |
|                                                     |         |                      |                      |                |               |           |              |              |          | Section 990 |                           |      |           |       |      |         |       |         |      |          |      |         |       |       |      |         |     |    |     |   |   |   |   |     |   |
| Autographa californica nucleopolyhedrovirus NC 0... | (76154) | 76154                | 76164                | 76175          | 76186         | 76197     | 76208        | 76219        | 76230    |             |                           |      |           |       |      |         |       |         |      |          |      |         |       |       |      |         |     |    |     |   |   |   |   |     |   |
|                                                     | (76133) | TAA                  | CGCGTTGCGT           | GTTGCTTGTG     | AA            | CTTCGGTAT | ATTTTAGATT   | GT           | CGCAT    | A           | TAGTGTTAAC                | T    | GCGTTTTTC | GT    | TG   |         |       |         |      |          |      |         |       |       |      |         |     |    |     |   |   |   |   |     |   |
| SARS-CoV-2 NC_045512.2                              | (2434)  | ---                  | CAGAGAAGAAA-CT-GGCCT | ACTCAT         | G             | CTCTAA    | AAGCCCCAAA-- | AGA          | A        | ATTATCTTCT  | T                         | AGA  | ---       | GG    | GAGA |         |       |         |      |          |      |         |       |       |      |         |     |    |     |   |   |   |   |     |   |
|                                                     |         |                      |                      |                |               |           |              |              |          | Section 991 |                           |      |           |       |      |         |       |         |      |          |      |         |       |       |      |         |     |    |     |   |   |   |   |     |   |
| Autographa californica nucleopolyhedrovirus NC 0... | (76231) | 76231                | 76241                | 76252          | 76263         | 76274     | 76285        | 76296        | 76307    |             |                           |      |           |       |      |         |       |         |      |          |      |         |       |       |      |         |     |    |     |   |   |   |   |     |   |
|                                                     | (76210) | TTATATAT             | CA                   | AAT            | GAA           | AGA       | TTA          | G            | CTG      | TTCGGC      | TTG                       | CAT  | CAT       | ACTG  | TTTA | GATT    | AA    | AC      | GC   | T        | TT   | ----    | GGTA  | ATT   | G    |         |     |    |     |   |   |   |   |     |   |
| SARS-CoV-2 NC_045512.2                              | (2500)  | AACAC                | TT                   | C              | CA            | GAA       | GTG          | TTA          | CA       | G           | AGGAAG                    | TTG  | TCT       | TGAA  | AACT | GGT     | GATT  | TACA    | AC   | CAT      | TAGA | ACAACCT | ACTA  |       |      |         |     |    |     |   |   |   |   |     |   |
|                                                     |         |                      |                      |                |               |           |              |              |          | Section 992 |                           |      |           |       |      |         |       |         |      |          |      |         |       |       |      |         |     |    |     |   |   |   |   |     |   |
| Autographa californica nucleopolyhedrovirus NC 0... | (76308) | 76308                | 76318                | 76329          | 76340         | 76351     | 76362        | 76373        | 76384    |             |                           |      |           |       |      |         |       |         |      |          |      |         |       |       |      |         |     |    |     |   |   |   |   |     |   |
|                                                     | (76282) | GT                   | TGC                  | GCT            | TGGAA         | TTAA      | AAT          | TC           | GCTTG    | AT          | CT                        | TTTC | TT        | -TATT | TC   | CAACTAA | ATGCC | TAGC    | GAT  | TCG      | TC   | AT      | TTTGA |       |      |         |     |    |     |   |   |   |   |     |   |
| SARS-CoV-2 NC_045512.2                              | (2577)  | GT                   | GAA                  | GCT            | GTTG          | A         | AGCTCCA      | TT           | G        | TTG         | TA                        | C    | CT        | TTT   | TT   | GATT    | AA    | GGGCTTA | ---- | TGTT     | GC   | TCG     | AAAT  | CAAAG |      |         |     |    |     |   |   |   |   |     |   |
|                                                     |         |                      |                      |                |               |           |              |              |          | Section 993 |                           |      |           |       |      |         |       |         |      |          |      |         |       |       |      |         |     |    |     |   |   |   |   |     |   |
| Autographa californica nucleopolyhedrovirus NC 0... | (76385) | 76385                | 76395                | 76406          | 76417         | 76428     | 76439        | 76450        | 76461    |             |                           |      |           |       |      |         |       |         |      |          |      |         |       |       |      |         |     |    |     |   |   |   |   |     |   |
|                                                     | (76358) | ATTG                 | ATTGTC               | GT             | CT            | TCGT      | C            | GAAAA        | TG       | GG          | C                         | AAAA | CCATT     | TTGA  | -CA  | TTTT    | AAAA  | CG      | TTTT | ATGAGGTG | TT   | GT      | TGC   | A     |      |         |     |    |     |   |   |   |   |     |   |
| SARS-CoV-2 NC_045512.2                              | (2649)  | ACAC                 | A                    | GAAAA          | GT            | AC        | T            | GTG          | CC       | T           | --                        | TG   | CA        | C     | TAA  | TATGAT  | GGT   | A       | CA   | AACA     | AT   | AC      | CT    | T     | CACA | -CTCAAA | GGC | GG | TGC | - |   |   |   |     |   |
|                                                     |         |                      |                      |                |               |           |              |              |          | Section 994 |                           |      |           |       |      |         |       |         |      |          |      |         |       |       |      |         |     |    |     |   |   |   |   |     |   |
| Autographa californica nucleopolyhedrovirus NC 0... | (76462) | 76462                | 76472                | 76483          | 76494         | 76505     | 76516        | 76527        | 76538    |             |                           |      |           |       |      |         |       |         |      |          |      |         |       |       |      |         |     |    |     |   |   |   |   |     |   |
|                                                     | (76434) | AAT                  | AA                   | ACC            | A             | TCCAT     | CG           | T            | CAT      | G           | A                         | C    | G         | CGT   | C    | GG      | C     | G       | A    | C        | A    | C       | G     | G     | C    | G       | A   | C  | A   | C | G | A |   |     |   |
| SARS-CoV-2 NC_045512.2                              | (2722)  | ACC                  | AA                   | CAA            | A             | GGTTA     | CT           | TTT          | GT       | G           | A                         | T    | G         | A     | C    | A       | C     | -T      | G    | T        | G    | A       | T     | A     | G    | A       | G   | A  | T   | A | C | A | T | --- | T |

SARS-CoV-2 & Autographa californica nucleopolyhedrovirus.apr

|                                                     |         |              |                |             |                   |                |              |                   |                          |
|-----------------------------------------------------|---------|--------------|----------------|-------------|-------------------|----------------|--------------|-------------------|--------------------------|
|                                                     |         | Section 995  |                |             |                   |                |              |                   |                          |
| Autographa californica nucleopolyhedrovirus NC 0... | (76539) | 76539        | 76549          | 76560       | 76571             | 76582          | 76593        | 76604             | 76615                    |
|                                                     | (76511) | TGGACGC      | GAAAATGCAGCGAT | TAACTCTCAT  | TTGTCCGCGCGCCAT   | ACCACGCGG      | CACCTAGCG    | CATATTTGTTGCCG    |                          |
|                                                     | (2794)  | TGAAC        | TTGATGA        | AAGGATTGAT  | TAAAGTACCT        | AATGAGAA       | --TGCTCTG    | CTATACAGTTGAA     | CTCGGTACAGAAGT           |
|                                                     |         | Section 996  |                |             |                   |                |              |                   |                          |
| Autographa californica nucleopolyhedrovirus NC 0... | (76616) | 76616        | 76626          | 76637       | 76648             | 76659          | 76670        | 76681             | 76692                    |
|                                                     | (76588) | TTATAAA      | TATGGA         | CTACGGCGATT | TTTGTGTGAT        | TGAGAAAGAA     | TCTCTT       | ATTCAAT           | AAATTTTAGCCAAGATTTGT     |
|                                                     | (2869)  | AAATGAG      | TTCTG          | -CTG---     | GTGTGTGCAGAT      | CTGTGCAT       | AAAACTT      | TGCAACCA          | AGTATCTGA-ATTACT----     |
|                                                     |         | Section 997  |                |             |                   |                |              |                   |                          |
| Autographa californica nucleopolyhedrovirus NC 0... | (76693) | 76693        | 76703          | 76714       | 76725             | 76736          | 76747        | 76758             | 76769                    |
|                                                     | (76665) | TATAAA       | TTTTAA         | TTCTTAT     | TATTGTTCTAATTAT   | TGCTGGCACAACAA | TATTTCGAT    | TTGTACGACGAAAACGG |                          |
|                                                     | (2937)  | CACCA        | -CTGGGC        | ATTGAT      | TAGATGAGTGG-AGTAT | TGCTACATACTACT | TATT--TGA    | TGAG-----         | TCTGGTG                  |
|                                                     |         | Section 998  |                |             |                   |                |              |                   |                          |
| Autographa californica nucleopolyhedrovirus NC 0... | (76770) | 76770        | 76780          | 76791       | 76802             | 76813          | 76824        | 76835             | 76846                    |
|                                                     | (76742) | CTTTCGC      | ACTCGTAT       | TACCTAT     | TCAAGAGCGCTT      | GCAATAAC       | ATAATATCAAG  | CGGTGAA           | AAAGACTAAT               |
|                                                     | (3003)  | AGTTTAA      | ATTGGCT        | TCA--CAT    | TATGTATTGTT       | CTTTCTAC       | CC-TCCAGAT   | GAGGATGA          | AGAGAGAGGTGATTGTGA       |
|                                                     |         | Section 999  |                |             |                   |                |              |                   |                          |
| Autographa californica nucleopolyhedrovirus NC 0... | (76847) | 76847        | 76857          | 76868       | 76879             | 76890          | 76901        | 76912             | 76923                    |
|                                                     | (76819) | AAAAA        | TTTGTTTAT      | TGTG        | CCTAAGATAC        | CAACGC         | GTGGTGG      | CGTGGTGTGA        | GAGAAAGCAAAGAAATCAA      |
|                                                     | (3077)  | GAA          | GA---GAGT      | T-TGAGCC    | ATCACTCA          | ATATGAGTAT     | GTGTACTG     | AAGATGATTACC      | AAGGTA--AC--TTTG         |
|                                                     |         | Section 1000 |                |             |                   |                |              |                   |                          |
| Autographa californica nucleopolyhedrovirus NC 0... | (76924) | 76924        | 76934          | 76945       | 76956             | 76967          | 76978        | 76989             | 77000                    |
|                                                     | (76896) | CCTTACAAGA   | CTCTTTTCG      | CACAACT     | TGAGTAAAA         | TAA            | TAAAGTGT     | ACGTTTACC         | AAACACGAT                |
|                                                     | (3146)  | GAA          | TTTGGTGC       | CA-----     | CTTCTGC           | TG-----        | CTCTCA       | CCCTG-AA---GA     | AGAGCAAGAGAA             |
|                                                     |         | Section 1001 |                |             |                   |                |              |                   |                          |
| Autographa californica nucleopolyhedrovirus NC 0... | (77001) | 77001        | 77011          | 77022       | 77033             | 77044          | 77055        | 77066             | 77077                    |
|                                                     | (76973) | ATT          | TGAACA         | TGTATATTTT  | TCGAAAAGTGACA     | TTGATCTATTTGAT | TCCACGATGGCG | ACACAGATA         | TCCAACTGC                |
|                                                     | (3208)  | TGA          | TGATAG         | TCAA        | -CAAAC            | TGTTGGTCAACAA  | --GACG       | GAG---TG--AGGA    | CAATCAGACAA--CTACTATTCAA |

SARS-CoV-2 & Autographa californica nucleopolyhedrovirus.apr

|                                                     |         |              |       |        |        |         |        |       |        |
|-----------------------------------------------------|---------|--------------|-------|--------|--------|---------|--------|-------|--------|
|                                                     |         | Section 1002 |       |        |        |         |        |       |        |
| Autographa californica nucleopolyhedrovirus NC 0... | (77078) | 77078        | 77088 | 77099  | 77110  | 77121   | 77132  | 77143 | 77154  |
|                                                     | (77050) | TGAC         | TTTG  | TGGA   | AAAT   | TGGG    | GACGCT | GCAAA | ACTCG  |
|                                                     | (3275)  | ACAA         | TTGT  | --GA   | GGTCA  | ACCTCAA | TAGA   | -GATG | GAACCT |
|                                                     |         | Section 1003 |       |        |        |         |        |       |        |
| Autographa californica nucleopolyhedrovirus NC 0... | (77155) | 77155        | 77165 | 77176  | 77187  | 77198   | 77209  | 77220 | 77231  |
|                                                     | (77177) | ATAC         | GCTC  | GAA    | ATTT   | TGAC    | GACGAC | GCGC  | CCGAC  |
|                                                     | (3346)  | TTT          | AGTGG | TTAT   | TAA    | ACTT    | ACTGA  | ----- | CAATG  |
|                                                     |         | Section 1004 |       |        |        |         |        |       |        |
| Autographa californica nucleopolyhedrovirus NC 0... | (77232) | 77232        | 77242 | 77253  | 77264  | 77275   | 77286  | 77297 | 77308  |
|                                                     | (77204) | CAT          | GGAA  | GCGTT  | AACCG  | ACGC    | GCAAA  | ACAT  | TACCG  |
|                                                     | (3416)  | AAG          | TAA   | A---AC | CAAC   | AG-T    | GTTG   | TAT   | ATGC   |
|                                                     |         | Section 1005 |       |        |        |         |        |       |        |
| Autographa californica nucleopolyhedrovirus NC 0... | (77309) | 77309        | 77319 | 77330  | 77341  | 77352   | 77363  | 77374 | 77385  |
|                                                     | (77281) | GAA          | AA    | TTTGA  | ACGG   | GAAC    | AA     | AAAT  | AGTGT  |
|                                                     | (3487)  | CTT          | AA    | A---T  | AGG    | CTAC    | TAA    | CAAT  | G---C  |
|                                                     |         | Section 1006 |       |        |        |         |        |       |        |
| Autographa californica nucleopolyhedrovirus NC 0... | (77386) | 77386        | 77396 | 77407  | 77418  | 77429   | 77440  | 77451 | 77462  |
|                                                     | (77358) | AAAT         | TGGAC | GGTAT  | GCG    | GGCA    | GAG    | GTCT  | GTTTAT |
|                                                     | (3553)  | ACT          | TAA   | AGT    | GGG    | TGTAG   | T--T   | GTGT  | TTTAA  |
|                                                     |         | Section 1007 |       |        |        |         |        |       |        |
| Autographa californica nucleopolyhedrovirus NC 0... | (77463) | 77463        | 77473 | 77484  | 77495  | 77506   | 77517  | 77528 | 77539  |
|                                                     | (77435) | C            | AA    | AA     | CCAA   | ATGG    | CCAA   | TCTGT | TGCGCT |
|                                                     | (3626)  | A            | ATG   | TAA    | ACAA   | GGTG    | AA     | GACA  | TTCA   |
|                                                     |         | Section 1008 |       |        |        |         |        |       |        |
| Autographa californica nucleopolyhedrovirus NC 0... | (77540) | 77540        | 77550 | 77561  | 77572  | 77583   | 77594  | 77605 | 77616  |
|                                                     | (77512) | TT           | TAC   | ATTAC  | AGATT  | TGCT    | GCA    | AGT   | GTTT   |
|                                                     | (3697)  | AC           | T     | TGC    | ACCATT | ATTAT   | CAG    | CTGT  | ATTTT  |



SARS-CoV-2 & Autographa californica nucleopolyhedrovirus.apr

|                                                     |         |                 |                |                    |              |              |               |           |            |
|-----------------------------------------------------|---------|-----------------|----------------|--------------------|--------------|--------------|---------------|-----------|------------|
|                                                     |         | Section 1009    |                |                    |              |              |               |           |            |
| Autographa californica nucleopolyhedrovirus NC 0... | (77617) | 77617           | 77627          | 77638              | 77649        | 77660        | 77671         | 77682     | 77693      |
|                                                     | (77589) | TCATAC          | GCTATAGATC     | CGGTGACGCCATCGAATG | TATAAACTAC   | ATGAACAA     | CAACGT        | GCAAGCG   | TACAGTTGAC |
|                                                     | (3769)  | TGTTTC          | GCACAAATGT     | CTACTTAGCTGTCTTT   | GA           | TAAAA        | TCTCTATG      | ACAA      | ACTTGTTC   |
|                                                     |         | Section 1010    |                |                    |              |              |               |           |            |
| Autographa californica nucleopolyhedrovirus NC 0... | (77694) | 77694           | 77704          | 77715              | 77726        | 77737        | 77748         | 77759     | 77770      |
|                                                     | (77666) | CGACACTTGCCCCGC | AA----         | TTGAA              | TTGCGGTTTCA  | GCAATTTT     | TTTGAT--      | CCACCGC   | TACAGC     |
|                                                     | (3841)  | -AATGAAGAGTGAAA | AGCAAG         | TTGAA              | CA--AAAGATC  | GCTGAGATT    | CCTAAAGAGGAAG | TTAAGC    | --CATTTA   |
|                                                     |         | Section 1011    |                |                    |              |              |               |           |            |
| Autographa californica nucleopolyhedrovirus NC 0... | (77771) | 77771           | 77781          | 77792              | 77803        | 77814        | 77825         | 77836     | 77847      |
|                                                     | (77737) | TGACCG          | GTGTC          | CGTGGAC            | GGGT         | ATGTCGTGCTCG | ACCCG         | AGTTGAGAT | ACGTC      |
|                                                     | (3913)  | TGA             | AA             | GT                 | AAA          | C-CTTCA      | GT            | TGA       | ACAGAGAAA  |
|                                                     |         | Section 1012    |                |                    |              |              |               |           |            |
| Autographa californica nucleopolyhedrovirus NC 0... | (77848) | 77848           | 77858          | 77869              | 77880        | 77891        | 77902         | 77913     | 77924      |
|                                                     | (77814) | GAGTT           | AGAGT          | ATGACG             | CCGTGA       | ATAAGT       | CGTTTAA       | CA-CAC    | TC         |
|                                                     | (3980)  | GTT--           | ACA--          | AC--AA             | CTC          | TGA          | AGAA          | AACTTGT   | TACTTT     |
|                                                     |         | Section 1013    |                |                    |              |              |               |           |            |
| Autographa californica nucleopolyhedrovirus NC 0... | (77925) | 77925           | 77935          | 77946              | 77957        | 77968        | 77979         | 77990     | 78001      |
|                                                     | (77890) | ACTTGCCGGAG     | TTACTGCACGAAAA | CATT               | TACGAA       | TGTGT        | ATCACGGACA    | CGACA     | ATAAA      |
|                                                     | (4050)  | A-T             | -----CT        | CA                 | TCCAGATTCTG  | CCAC         | TCTTGT        | TAGTGA    | CATTGA     |
|                                                     |         | Section 1014    |                |                    |              |              |               |           |            |
| Autographa californica nucleopolyhedrovirus NC 0... | (78002) | 78002           | 78012          | 78023              | 78034        | 78045        | 78056         | 78067     | 78078      |
|                                                     | (77967) | CGC             | GAC            | CGA                | ATCGTGCCAAAT | TAAAG        | CACGT         | TAAAG     | CGGAT      |
|                                                     | (4109)  | GAT             | GCT            | CCA                | T-ATATAGTGGG | TGAT         | GTGT          | TC        | AAAG       |
|                                                     |         | Section 1015    |                |                    |              |              |               |           |            |
| Autographa californica nucleopolyhedrovirus NC 0... | (78079) | 78079           | 78089          | 78100              | 78111        | 78122        | 78133         | 78144     | 78155      |
|                                                     | (78044) | ATCGTTA         | AC             | AAAC               | GAATAC       | GCATTGTTGTG  | ACAGCT        | GAG       | GAT        |
|                                                     | (4173)  | C-----          | TAA            | AAAG               | GC           | TGGT         | GCACTACTGA    | AA        | TGCT       |

SARS-CoV-2 & Autographa californica nucleopolyhedrovirus.apr

|                                                     |         |              |                    |              |                |            |             |              |                      |
|-----------------------------------------------------|---------|--------------|--------------------|--------------|----------------|------------|-------------|--------------|----------------------|
|                                                     |         | Section 1016 |                    |              |                |            |             |              |                      |
| Autographa californica nucleopolyhedrovirus NC 0... | (78156) | 78156        | 78166              | 78177        | 78188          | 78199      | 78210       | 78221        | 78232                |
|                                                     | (78121) | TCCCGTTAC    | AATTCCACGGCACAGCGT | ATGTT        | GCTCGAGT       | TCTATCAG   | TTGCACACAAC | GCCTAAGAA    | AAATTTATT            |
|                                                     | (4242)  | TAACTACTT    | ACCCGGGTCAGGGTTTAA | ATG          | GTACACTGT      | AGAGGAGG   | -CAAAGACAGT | GCTTAAA      | -AGTGTAAA            |
|                                                     |         | Section 1017 |                    |              |                |            |             |              |                      |
| Autographa californica nucleopolyhedrovirus NC 0... | (78233) | 78233        | 78243              | 78254        | 78265          | 78276      | 78287       | 78298        | 78309                |
|                                                     | (78198) | AATGCTTCATT  | TGTAATC            | TATATTAGAAGG | ATAAT          | ACATAGGT   | TCGCCCAAGG  | ACTGGGAG     | AAGGCGGCGGCGAAGG     |
|                                                     | (4317)  | GTGCCT-----  | TTTACAT            | TCTACCA-TCT  | ATATCTCT       | -AATGAG    | AAGCAAGAA   | TTCTTGA      | ACT-----             |
|                                                     |         | Section 1018 |                    |              |                |            |             |              |                      |
| Autographa californica nucleopolyhedrovirus NC 0... | (78310) | 78310        | 78320              | 78331        | 78342          | 78353      | 78364       | 78375        | 78386                |
|                                                     | (78275) | TGTAGGT      | TGTAGGAGGAAT       | AGGAGAAGGC   | GCGGCGAAG      | GTGAGGT    | GTTGGAGG    | AGGAAT       | AGGAGAAAG            |
|                                                     | (4376)  | -GTTTC       | TGGAATTTGCG        | AGAAATGCTT   | GACATGCAG      | AAGAAACACG | CAAAATTAAT  | GCCTGTCT     | GTGTGAA---A          |
|                                                     |         | Section 1019 |                    |              |                |            |             |              |                      |
| Autographa californica nucleopolyhedrovirus NC 0... | (78387) | 78387        | 78397              | 78408        | 78419          | 78430      | 78441       | 78452        | 78463                |
|                                                     | (78352) | GTTAGGTG     | TAGGAGGA           | ATAGGAGAAG   | GTGAGGT        | GTTAGGT    | GTTAGGT     | GTTAGG       | AGGTGT               |
|                                                     | (4449)  | CTAAAGCCA    | TAGTTT-TC          | ACTATAC-AG   | CGTAATA        | TATAGGTA   | TTAAATACAAG | AGGGTGT      | TGG-----TTG          |
|                                                     |         | Section 1020 |                    |              |                |            |             |              |                      |
| Autographa californica nucleopolyhedrovirus NC 0... | (78464) | 78464        | 78474              | 78485        | 78496          | 78507      | 78518       | 78529        | 78540                |
|                                                     | (78429) | GGTGTAGGT    | TGTGAGGTATAG       | GTGTT        | GGAGGAGGT      | GTAGCGA    | AGGTGGA     | GAAGGT       | GTTAGGAGT            |
|                                                     | (4515)  | AT-----      | TGGTGCT-----       | AGATTT       | TACTTTTACACCAG | --TAA      | AAACAAC     | TGTAGCGTCACT | TATCAACACACTT        |
|                                                     |         | Section 1021 |                    |              |                |            |             |              |                      |
| Autographa californica nucleopolyhedrovirus NC 0... | (78541) | 78541        | 78551              | 78562        | 78573          | 78584      | 78595       | 78606        | 78617                |
|                                                     | (78506) | AGGTAA       | CGGTACA            | ATTGGTGGAGAT | GTTAGGTGGT     | GTTAGGT    | CAATTCTG    | AAATGTCG     | TCTA                 |
|                                                     | (4580)  | AACGAT       | CTAAATGA           | AACT-----    | C-----         | TTGTTACA   | ATGCCACTT   | -GGCTAT      | GTATA--ACACATGGCTTAA |
|                                                     |         | Section 1022 |                    |              |                |            |             |              |                      |
| Autographa californica nucleopolyhedrovirus NC 0... | (78618) | 78618        | 78628              | 78639        | 78650          | 78661      | 78672       | 78683        | 78694                |
|                                                     | (78583) | ATATTTTTTA   | AAGTTAA            | TAAAATTATTA  | TAAAT          | TAATTA     | TATTA       | TTATTA       | ATATCACAA            |
|                                                     | (4638)  | ATTTGGAAG    | AAGCTGC            | TC-----      | GGTATAT        | TAGATCTC   | TCAAAGT     | GCCAGCTAC    | AGTTCTTGTTTCTTCACTGA |

SARS-CoV-2 & Autographa californica nucleopolyhedrovirus.apr

|                                                     |         |                                                                                 |              |       |       |       |       |       |       |  |
|-----------------------------------------------------|---------|---------------------------------------------------------------------------------|--------------|-------|-------|-------|-------|-------|-------|--|
|                                                     |         |                                                                                 | Section 1023 |       |       |       |       |       |       |  |
| Autographa californica nucleopolyhedrovirus NC 0... | (78695) | 78695                                                                           | 78705        | 78716 | 78727 | 78738 | 78749 | 78760 | 78771 |  |
|                                                     | (78660) | ATGTTGCTTAAATATAAAATTAACAAAGATGTTGTATATTGCAAATTTAAACAATTTTTTGTATTCTCCCCATG      |              |       |       |       |       |       |       |  |
|                                                     | (4708)  | TGCTGTGTAC----AGC--GTAATAATGGTTATCTTACTTCT-CTTC--TAAAA--CACCAGAAAGAACATTTTAT    |              |       |       |       |       |       |       |  |
|                                                     |         |                                                                                 | Section 1024 |       |       |       |       |       |       |  |
| Autographa californica nucleopolyhedrovirus NC 0... | (78772) | 78772                                                                           | 78782        | 78793 | 78804 | 78815 | 78826 | 78837 | 78848 |  |
|                                                     | (78737) | TCATGCGTTCGTAAATGAGCGGGCGGTTTCTATTCTTTGTATCCACTGTAAATCGTTAATGTGGTTGTGAAAAGTC    |              |       |       |       |       |       |       |  |
|                                                     | (4771)  | TGAAACCATCTCAC-----TTGCTGGTTCCATAAAGATTGGTCT-ATTCTGGACAATCTACA----CAACTA-       |              |       |       |       |       |       |       |  |
|                                                     |         |                                                                                 | Section 1025 |       |       |       |       |       |       |  |
| Autographa californica nucleopolyhedrovirus NC 0... | (78849) | 78849                                                                           | 78859        | 78870 | 78881 | 78892 | 78903 | 78914 | 78925 |  |
|                                                     | (78814) | -ATACTGACGTAGGCATTAAATTTTTCATGAGCATATTATTTGACACAAGTGCACATCTGCGCTGCCGTTTTCTT     |              |       |       |       |       |       |       |  |
|                                                     | (4835)  | GGTATAGA---ATTTCTTAAGAGAGGTGATAAAGTGTATATTACACTAG----TAATCCTACCAATTCCACCTAG     |              |       |       |       |       |       |       |  |
|                                                     |         |                                                                                 | Section 1026 |       |       |       |       |       |       |  |
| Autographa californica nucleopolyhedrovirus NC 0... | (78926) | 78926                                                                           | 78936        | 78947 | 78958 | 78969 | 78980 | 78991 | 79002 |  |
|                                                     | (78890) | GCTGGTACGAATCGACAAACGTAAATGTCGTGCGGTATTCTTTCTTTGTCAAGTGCAATTTCTATTAAGCTCAATGTGG |              |       |       |       |       |       |       |  |
|                                                     | (4905)  | ATGTGTAGAGTTATCACCTTTGACAATCTTAAAGACACTTCTTTCTTTGAGAGAAGTGAGGACTATTA-AGGTGTTTA- |              |       |       |       |       |       |       |  |
|                                                     |         |                                                                                 | Section 1027 |       |       |       |       |       |       |  |
| Autographa californica nucleopolyhedrovirus NC 0... | (79003) | 79003                                                                           | 79013        | 79024 | 79035 | 79046 | 79057 | 79068 | 79079 |  |
|                                                     | (78967) | TAAATGATGAACCTTTGACGTTTCATATAATGATCGCGGCACATGGCGCACGTGTAGTATGAAAAATACGTTGTAAAA  |              |       |       |       |       |       |       |  |
|                                                     | (4980)  | CAACAGTAGACA-----ACATTAACTTCCAC--ACGCAAGTTGTGGACATGTCAATG---ACATAT---GGACAA-C   |              |       |       |       |       |       |       |  |
|                                                     |         |                                                                                 | Section 1028 |       |       |       |       |       |       |  |
| Autographa californica nucleopolyhedrovirus NC 0... | (79080) | 79080                                                                           | 79090        | 79101 | 79112 | 79123 | 79134 | 79145 | 79156 |  |
|                                                     | (79044) | TAGCACCTTCATTGTTTCAACTGCTGCAATGACAAAACTATACTGCTTTTGTCTCGCGTATACACCATATCGTCGA    |              |       |       |       |       |       |       |  |
|                                                     | (5043)  | AGTTTGGTCAACTTATTGTGA---TGAGCTGATGTTACTAAAATAAAACCCTCA-----T-----AATTCA         |              |       |       |       |       |       |       |  |
|                                                     |         |                                                                                 | Section 1029 |       |       |       |       |       |       |  |
| Autographa californica nucleopolyhedrovirus NC 0... | (79157) | 79157                                                                           | 79167        | 79178 | 79189 | 79200 | 79211 | 79222 | 79233 |  |
|                                                     | (79121) | TGATGAGACTGAGAAAGTGCATGTGTCCCATATGGTAGTAAACGTGTAAATAAACTCTTGAGCTGGCACGAACGC     |              |       |       |       |       |       |       |  |
|                                                     | (5102)  | CA-TGAAG-GTAAAAATTATTTATGTTTACCTAAT---GATGACACTCTACGT-----GTTGAGGCTTTT---GAG    |              |       |       |       |       |       |       |  |

SARS-CoV-2 & Autographa californica nucleopolyhedrovirus.apr

|                                                     |         |              |            |           |             |          |           |               |           |                    |                  |            |           |             |             |      |        |         |        |          |      |        |      |      |      |      |       |   |       |    |     |
|-----------------------------------------------------|---------|--------------|------------|-----------|-------------|----------|-----------|---------------|-----------|--------------------|------------------|------------|-----------|-------------|-------------|------|--------|---------|--------|----------|------|--------|------|------|------|------|-------|---|-------|----|-----|
|                                                     |         | Section 1030 |            |           |             |          |           |               |           |                    |                  |            |           |             |             |      |        |         |        |          |      |        |      |      |      |      |       |   |       |    |     |
| Autographa californica nucleopolyhedrovirus NC 0... | (79234) | 79234        | 79244      | 79255     | 79266       | 79277    | 79288     | 79299         | 79310     |                    |                  |            |           |             |             |      |        |         |        |          |      |        |      |      |      |      |       |   |       |    |     |
|                                                     | (79198) | AAAT         | TTGAGTT    | CTGTG     | GT          | TTTGTCCA | TAAAT     | TCTATGCGAAACT | GT        | TGCAAGTC           | CATGT            | TCGGGGG    | ATG       | CGTT        | AAT         | GGC  |        |         |        |          |      |        |      |      |      |      |       |   |       |    |     |
|                                                     | (5165)  | TACT         | ACCACA     | CAACT     | GAT         | CCTAGTT  | TTC--     | TGG-----GTA   | GGT       | ACAT               | GTC              | AGCA       | T         | TAAATC      | ACA         | CTAA | AAAG   | TG      |        |          |      |        |      |      |      |      |       |   |       |    |     |
|                                                     |         | Section 1031 |            |           |             |          |           |               |           |                    |                  |            |           |             |             |      |        |         |        |          |      |        |      |      |      |      |       |   |       |    |     |
| Autographa californica nucleopolyhedrovirus NC 0... | (79311) | 79311        | 79321      | 79332     | 79343       | 79354    | 79365     | 79376         | 79387     |                    |                  |            |           |             |             |      |        |         |        |          |      |        |      |      |      |      |       |   |       |    |     |
|                                                     | (79275) | CCAT         | TCGAT      | CAACT     | CT          | TGCACC   | TCGT      | ACTT          | TTGAATGTC | TTTG               | TATTT            | CATCAAAC   | ACGC      | AAAA        | TGGT        | TAT  | TAAGT  | AAG     |        |          |      |        |      |      |      |      |       |   |       |    |     |
|                                                     | (5233)  | GAAAT        | TAC-C      | CA        | CAAGT       | T        | AAATGG    | TTTA          | ACTT      | -----CTAT          | TAAA             | TGGGCAGA   | ----      | T           | ACAA        | ACTG | T      | TAT     | CT     | TTGCC    | ACT  |        |      |      |      |      |       |   |       |    |     |
|                                                     |         | Section 1032 |            |           |             |          |           |               |           |                    |                  |            |           |             |             |      |        |         |        |          |      |        |      |      |      |      |       |   |       |    |     |
| Autographa californica nucleopolyhedrovirus NC 0... | (79388) | 79388        | 79398      | 79409     | 79420       | 79431    | 79442     | 79453         | 79464     |                    |                  |            |           |             |             |      |        |         |        |          |      |        |      |      |      |      |       |   |       |    |     |
|                                                     | (79352) | TTGC         | TTGCGAAGAC | AACAG     | TTTGGTG     | AGGT     | GC        | GTC           | GATTT     | TAGAGGCTCGCAAAGGTC | TATGAGACGAAACGAA | TAC        |           |             |             |      |        |         |        |          |      |        |      |      |      |      |       |   |       |    |     |
|                                                     | (5300)  | GCAT         | TGTT-----  | AACA      | C           | TCCAACA  | A         | ATA           | GAGT      | GAGT               | -----TTAA        | TCCACCTGC  | -----T    | C           | TAC         |      |        |         |        |          |      |        |      |      |      |      |       |   |       |    |     |
|                                                     |         | Section 1033 |            |           |             |          |           |               |           |                    |                  |            |           |             |             |      |        |         |        |          |      |        |      |      |      |      |       |   |       |    |     |
| Autographa californica nucleopolyhedrovirus NC 0... | (79465) | 79465        | 79475      | 79486     | 79497       | 79508    | 79519     | 79530         | 79541     |                    |                  |            |           |             |             |      |        |         |        |          |      |        |      |      |      |      |       |   |       |    |     |
|                                                     | (79429) | AA           | CA         | GATAGCTGT | CTT         | TG       | TAAC      | GAG           | AAAAAGC   | GGC                | GTCAGC           | GGTAT      | TC        | ATGGCGACTAG | C           | AA   | A      | ACGAT   | CT     | TGCTGTA  |      |        |      |      |      |      |       |   |       |    |     |
|                                                     | (5352)  | AAG          | GA         | -TG-----  | CTT         | AT       | TA        | CA            | GAGC      | AA                 | GGGCT            | GGT        | G         | AAGCT       | GC--        | T    | A      | CTTTT   | TGTGCA | CTTA     | T    | CT     | TAG  | CCTA | CT   |      |       |   |       |    |     |
|                                                     |         | Section 1034 |            |           |             |          |           |               |           |                    |                  |            |           |             |             |      |        |         |        |          |      |        |      |      |      |      |       |   |       |    |     |
| Autographa californica nucleopolyhedrovirus NC 0... | (79542) | 79542        | 79552      | 79563     | 79574       | 79585    | 79596     | 79607         | 79618     |                    |                  |            |           |             |             |      |        |         |        |          |      |        |      |      |      |      |       |   |       |    |     |
|                                                     | (79506) | CT           | TG         | TGTC      | AGGCGCC     | G        | GCCACAGC  | GTC           | GT        | TGTACGTTAGCG       | CAGAC            | ACGG       | AC        | GCCGACGAG   | C           | CTAT | TATTT  | ATTT    | TC     | G        |      |        |      |      |      |      |       |   |       |    |     |
|                                                     | (5418)  | G            | TAA        | T         | AAG         | A        | CAGTAG    | G             | TGA       | -GTTA              | G                | G          | T         | GAT         | -GTTAGAGAAA | CA   | ATG    | AGTT    | AC     | TTGT     | --TT | CA     | ACAT | T    | GCCA | ATTT | AG    |   |       |    |     |
|                                                     |         | Section 1035 |            |           |             |          |           |               |           |                    |                  |            |           |             |             |      |        |         |        |          |      |        |      |      |      |      |       |   |       |    |     |
| Autographa californica nucleopolyhedrovirus NC 0... | (79619) | 79619        | 79629      | 79640     | 79651       | 79662    | 79673     | 79684         | 79695     |                    |                  |            |           |             |             |      |        |         |        |          |      |        |      |      |      |      |       |   |       |    |     |
|                                                     | (79583) | AAAA         | TATT       | A         | CAGAATGTCTT | A        | CGGACGACC | AA            | T         | GC                 | GACAA            | GT         | TT        | ACT         | TAT         | TTTG | CTGA   | ACTCA   | A      | ACAGGAGC | AAG  | C      |      |      |      |      |       |   |       |    |     |
|                                                     | (5490)  | ATT          | C          | T         | TGC         | AA-----  | AAG       | A             | GTC       | ---TTG             | AA               | C          | G         | T           | G           | T    | G      | T       | GT     | TAA      | AA   | C      | T    | TG   | TGA  | CAAC | AGCAG | A | ----- | CA | ACC |
|                                                     |         | Section 1036 |            |           |             |          |           |               |           |                    |                  |            |           |             |             |      |        |         |        |          |      |        |      |      |      |      |       |   |       |    |     |
| Autographa californica nucleopolyhedrovirus NC 0... | (79696) | 79696        | 79706      | 79717     | 79728       | 79739    | 79750     | 79761         | 79772     |                    |                  |            |           |             |             |      |        |         |        |          |      |        |      |      |      |      |       |   |       |    |     |
|                                                     | (79660) | T            | T          | ATTTATG   | AAAA        | AAGTA    | T         | ACAAAC        | A         | C                  | T                | TGGTGCTTAA | AA        | AC          | GAGGG       | T    | GCTTTT | AA      | CAAA   | CACACG   | TATT | TGT    | T    | CG   | A    |      |       |   |       |    |     |
|                                                     | (5551)  | T            | A          | AGGGTGT   | A           | AA       | GCTGT     | T-----        | A         | -                  | T                | G          | TACATGGGC | A           | C           | AC   | TTTCT  | TATGAAC | AA     | ---      | TTT  | AAGAAA | -GGT | G    | TTC  | A    |       |   |       |    |     |

SARS-CoV-2 & Autographa californica nucleopolyhedrovirus.apr

|                                                     |         |              |                                |                 |         |            |             |         |                |
|-----------------------------------------------------|---------|--------------|--------------------------------|-----------------|---------|------------|-------------|---------|----------------|
|                                                     |         | Section 1037 |                                |                 |         |            |             |         |                |
| Autographa californica nucleopolyhedrovirus NC 0... | (79773) | 79773        | 79783                          | 79794           | 79805   | 79816      | 79827       | 79838   | 79849          |
|                                                     | (79737) | TGC          | AATGA                          | TTATGTATAAGACAT | ATGTGCA | TTGGTCA    | ACGAGTC     | TGG     | GTTC           |
|                                                     | (5617)  | GAT          | ACC-T                          | TGTACGTG--TGGTA | ACAAGCT | TACAAAAT   | A           | TCTAG-T | AGACA          |
|                                                     |         | Section 1038 |                                |                 |         |            |             |         |                |
| Autographa californica nucleopolyhedrovirus NC 0... | (79850) | 79850        | 79860                          | 79871           | 79882   | 79893      | 79904       | 79915   | 79926          |
|                                                     | (79814) | AAC          | AGTTTA                         | TCACGGC         | CAT     | TTT        | TG          | AAAT    | TTTTACGCT      |
|                                                     | (5689)  | AG           | CA                             | CCACC           | TGC---  | T          | CAG         | TAT     | GAACT          |
|                                                     |         | Section 1039 |                                |                 |         |            |             |         |                |
| Autographa californica nucleopolyhedrovirus NC 0... | (79927) | 79927        | 79937                          | 79948           | 79959   | 79970      | 79981       | 79992   | 80003          |
|                                                     | (79891) | AAC          | GAT                            | AAAT            | TTT     | AGT        | TGTACTTTT   | GAAACA  | TTTGCACA       |
|                                                     | (5744)  | T            | ACAC                           | TGGT--          | AAAT    | TACCAG---- | TGTGGT      | CACT-AT | AAACA          |
|                                                     |         | Section 1040 |                                |                 |         |            |             |         |                |
| Autographa californica nucleopolyhedrovirus NC 0... | (80004) | 80004        | 80014                          | 80025           | 80036   | 80047      | 80058       | 80069   | 80080          |
|                                                     | (79968) | ATC          | ATGT                           | TGGGGAAT        | CGTGT   | TAC        | TTA         | TCGT    | TTTGCTCATACTGT |
|                                                     | (5814)  | G            | TGC                            | TTT             | ACTT--  | A          | CAAAG       | T       | CCTC           |
|                                                     |         | Section 1041 |                                |                 |         |            |             |         |                |
| Autographa californica nucleopolyhedrovirus NC 0... | (80081) | 80081        | 80091                          | 80102           | 80113   | 80124      | 80135       | 80146   | 80157          |
|                                                     | (80045) | TT           | CCTTA                          | ACCG            | AGT     | CGTCGCC    | CAGTTTAGGGC | A       | GAGCA          |
|                                                     | (5887)  | AA           | CAACC                          | ATAA            | AAC     | CAGT-TAC   | T-----      | TAT     | AA-ATT         |
|                                                     |         | Section 1042 |                                |                 |         |            |             |         |                |
| Autographa californica nucleopolyhedrovirus NC 0... | (80158) | 80158        | 80168                          | 80179           | 80190   | 80201      | 80212       | 80223   | 80234          |
|                                                     | (80122) | TAA          | AGCTGAATAACGGCCGGGTGGCCAACTTGC | CA              | TCGC    | ACA        | C           | GGCGAT  | AA             |
|                                                     | (5922)  | GTG          | TTG-----                       | TTTGT---        | A-----  | CAG        | AA          | ATTG    | AC             |
|                                                     |         | Section 1043 |                                |                 |         |            |             |         |                |
| Autographa californica nucleopolyhedrovirus NC 0... | (80235) | 80235        | 80245                          | 80256           | 80267   | 80278      | 80289       | 80300   | 80311          |
|                                                     | (80199) | GAA          | AAAC                           | CGCTA           | TCT     | AT         | AGA         | CG      | ACAT           |
|                                                     | (5972)  | GAC          | AA                             | TTCTTAT         | TTCA    | AGA        | GCA         | ACCA    | AT             |

SARS-CoV-2 & Autographa californica nucleopolyhedrovirus.apr

|                                                     |         |              |             |              |               |                 |                  |            |                     |                |          |         |          |           |       |
|-----------------------------------------------------|---------|--------------|-------------|--------------|---------------|-----------------|------------------|------------|---------------------|----------------|----------|---------|----------|-----------|-------|
|                                                     |         | Section 1044 |             |              |               |                 |                  |            |                     |                |          |         |          |           |       |
| Autographa californica nucleopolyhedrovirus NC 0... | (80312) | 80312        | 80322       | 80333        | 80344         | 80355           | 80366            | 80377      | 80388               |                |          |         |          |           |       |
|                                                     | (80276) | CGTATACGAC   | TATGGAATCA  | AATCACCAAA   | CGCGGC        | CAGCACA         | TCTAGTAATG       | TAACCATG   | ACGCGCGCGCGCCGCAAA  |                |          |         |          |           |       |
|                                                     | (6045)  | ATTTTAAGTT   | TGT--ATGTG  | ATAATATCAA   | ATTTGC        | TGATGATTTA      | AACCAAGT         | TAAC--TG   | GTTATAAGGA-----AA   |                |          |         |          |           |       |
|                                                     |         | Section 1045 |             |              |               |                 |                  |            |                     |                |          |         |          |           |       |
| Autographa californica nucleopolyhedrovirus NC 0... | (80389) | 80389        | 80399       | 80410        | 80421         | 80432           | 80443            | 80454      | 80465               |                |          |         |          |           |       |
|                                                     | (80353) | ACTTTGATATC  | AAGGAA      | TTCAAGTCCATG | TTTATCGT      | TATTCAAGGGT     | GTGACGCCCACTAAAA | ACTGTAGAGG | ACAAT               |                |          |         |          |           |       |
|                                                     | (6113)  | CTGCTTCAAG   | AGAGC-TT    | TAAGTTACAT   | TTTTCCT       | GACTTAAATG      | GTGATGTGG-TGGCT  | ATTGATTATA | ACAC                |                |          |         |          |           |       |
|                                                     |         | Section 1046 |             |              |               |                 |                  |            |                     |                |          |         |          |           |       |
| Autographa californica nucleopolyhedrovirus NC 0... | (80466) | 80466        | 80476       | 80487        | 80498         | 80509           | 80520            | 80531      | 80542               |                |          |         |          |           |       |
|                                                     | (80430) | GGCATGTTGCG  | ATTGGAAGT   | CGACAACATG   | ATTGTGTGTTT   | TGATCGACCCC     | AAACCGGCGCCGCT   | GTCCGAAC   | GAGAA               |                |          |         |          |           |       |
|                                                     | (6188)  | T-AC-----    | ACA         | CCT--CTTT    | AAGAAAGGAGC   | TAAATT--GTTA    | CATAAAC          | C---TATTG  | TTTGGCATGTTAA       |                |          |         |          |           |       |
|                                                     |         | Section 1047 |             |              |               |                 |                  |            |                     |                |          |         |          |           |       |
| Autographa californica nucleopolyhedrovirus NC 0... | (80543) | 80543        | 80553       | 80564        | 80575         | 80586           | 80597            | 80608      | 80619               |                |          |         |          |           |       |
|                                                     | (80507) | GGTGCGCGAATT | GCGCAAATCT  | AAATTGCAC    | TTTGGTGTACACA | AGAAACGCGGCAGCT | CAGCAAGTTTTAT    | TTGGAAA    |                     |                |          |         |          |           |       |
|                                                     | (6250)  | CAAT--GC--   | AACTAA--T-- | AAAGCCACGT   | -----ATAA     | ACCAAA          | T--AC-CT         | GGTG-----  | -----TATAC-G        |                |          |         |          |           |       |
|                                                     |         | Section 1048 |             |              |               |                 |                  |            |                     |                |          |         |          |           |       |
| Autographa californica nucleopolyhedrovirus NC 0... | (80620) | 80620        | 80630       | 80641        | 80652         | 80663           | 80674            | 80685      | 80696               |                |          |         |          |           |       |
|                                                     | (80584) | ATAACCTTT    | ACCGT       | CATTAA       | TCTGAACA      | AAACCGCCTATCT   | CAAAAACTATA      | AAATCAT    | TACAGAAATGAATTAATAA |                |          |         |          |           |       |
|                                                     | (6298)  | TGTCTTT      | GGAGCA-CA   | AAAC         | CAGT-TG       | AA-----         | ACATCAAA         | TTT        | CGTTGA---TGTACT     | GAA-----GTC--- |          |         |          |           |       |
|                                                     |         | Section 1049 |             |              |               |                 |                  |            |                     |                |          |         |          |           |       |
| Autographa californica nucleopolyhedrovirus NC 0... | (80697) | 80697        | 80707       | 80718        | 80729         | 80740           | 80751            | 80762      | 80773               |                |          |         |          |           |       |
|                                                     | (80661) | AACAAA       | AAGTCT      | TATTTATAT    | ATATATTATT    | TATTAA          | CATACAAA         | ATTTGGTA   | CAC                 | TAGTGTTC       | AAATCG   | TTTCTGT |          |           |       |
|                                                     | (6355)  | AGAGGA       | CGCGC       | AGGGAAT      | GGAATA        | ATCTTT          | GCC              | TGCGAAG--  | ATCT                | AAA            | ACCAGTCT | CTGAA   | GAGTAG   | TGGAAA--A |       |
|                                                     |         | Section 1050 |             |              |               |                 |                  |            |                     |                |          |         |          |           |       |
| Autographa californica nucleopolyhedrovirus NC 0... | (80774) | 80774        | 80784       | 80795        | 80806         | 80817           | 80828            | 80839      | 80850               |                |          |         |          |           |       |
|                                                     | (80738) | TCAACG       | CCA         | TTGT         | CATGTT        | ATAAAACACATTT   | G                | TAGT       | TTTAT               | TGTAA          | TTATTTTT | AAATTT  | ATATTTTT | AA-TT     | TGCTG |
|                                                     | (6427)  | -TCCTA       | CCA---      | TACAG        | AAAG          | ACGTTCTT--      | GAGTGT           | TAATGTG    | AAACTACCGA          | AGT            | TGTAG    | GAGAC   | ATTAT    | ACT       |       |

SARS-CoV-2 & Autographa californica nucleopolyhedrovirus.apr

|                                                     |         |                                                                               |                     |                                              |            |                |              |       |       |  |
|-----------------------------------------------------|---------|-------------------------------------------------------------------------------|---------------------|----------------------------------------------|------------|----------------|--------------|-------|-------|--|
|                                                     |         |                                                                               | Section 1051        |                                              |            |                |              |       |       |  |
| Autographa californica nucleopolyhedrovirus NC 0... | (80851) | 80851                                                                         | 80861               | 80872                                        | 80883      | 80894          | 80905        | 80916 | 80927 |  |
|                                                     | (80814) | TAAATAAACCTTGTTTCATTAAATACAAAAGACTTTGAACCTACTGCGTTTATATTCTTTTTAT              | AATTGTA             | CTGAACAA                                     |            |                |              |       |       |  |
|                                                     | (6497)  | AAAC-CAGCAAAATAA----                                                          | AGTTTAAAAT          | TACAGAGAGGTGG-----                           | CCACACAGAT | CTAATGG        | CTGCTTA      |       |       |  |
|                                                     |         |                                                                               | Section 1052        |                                              |            |                |              |       |       |  |
| Autographa californica nucleopolyhedrovirus NC 0... | (80928) | 80928                                                                         | 80938               | 80949                                        | 80960      | 80971          | 80982        | 80993 | 81004 |  |
|                                                     | (80891) | ACGAGGGGTGCAAAAAGTTTTTGAAATGCTGCACGGCAATACCTATCATCTCCTCCATTTTGTCTCTCTCTATT    | GTA                 |                                              |            |                |              |       |       |  |
|                                                     | (6563)  | GTAGACAAATTCCTAGTCTTACTA-----                                                 | TT-----             | AA                                           | GAA        |                |              |       |       |  |
|                                                     |         |                                                                               | Section 1053        |                                              |            |                |              |       |       |  |
| Autographa californica nucleopolyhedrovirus NC 0... | (81005) | 81005                                                                         | 81015               | 81026                                        | 81037      | 81048          | 81059        | 81070 | 81081 |  |
|                                                     | (80968) | ATAGTGGCACTGCGCACCGTTTTAATGTTTAGAATGTAAATGAGCGCATACAGCGGACTATTGTTGGTGCTCAAGCA |                     |                                              |            |                |              |       |       |  |
|                                                     | (6592)  | ACCTAAT-----                                                                  | GAATATCTAG          | -----                                        | A-----     | GTAT           |              |       |       |  |
|                                                     |         |                                                                               | Section 1054        |                                              |            |                |              |       |       |  |
| Autographa californica nucleopolyhedrovirus NC 0... | (81082) | 81082                                                                         | 81092               | 81103                                        | 81114      | 81125          | 81136        | 81147 | 81158 |  |
|                                                     | (81045) | CATTAGGTTGTGCTTATGCATAGGGTCGTTGCTCAGCAGCGTTTGTATATACTACAAAGCCCGTTTGGGGTCGCGTC |                     |                                              |            |                |              |       |       |  |
|                                                     | (6615)  | TAGGTT-----                                                                   | TGAAAC-----         | CTTGCTACTCATGGTTAGCTGCTGTTAATAGTGTCCCTTG---- |            |                |              |       |       |  |
|                                                     |         |                                                                               | Section 1055        |                                              |            |                |              |       |       |  |
| Autographa californica nucleopolyhedrovirus NC 0... | (81159) | 81159                                                                         | 81169               | 81180                                        | 81191      | 81202          | 81213        | 81224 | 81235 |  |
|                                                     | (81122) | TGTACATTAGTACGTGCGACAAACAAACGCACCGCGTCAAGCGACTCGTAATACATGCTTTC                | TATC                | GGAAA                                        |            |                |              |       |       |  |
|                                                     | (6670)  | --GGATAC-----                                                                 | TATAGC--            | TAATTATGCTAAGCCT-----                        | TTCTTAA    | C              |              |       |       |  |
|                                                     |         |                                                                               | Section 1056        |                                              |            |                |              |       |       |  |
| Autographa californica nucleopolyhedrovirus NC 0... | (81236) | 81236                                                                         | 81246               | 81257                                        | 81268      | 81279          | 81290        | 81301 | 81312 |  |
|                                                     | (81198) | CTGTTTGGACTTGATGTGTTCTGTACACGGAGCCGGCAAACTTGACGCTGTCTACAACTTATGGTTCTGTAAACAA  |                     |                                              |            |                |              |       |       |  |
|                                                     | (6707)  | AAAGTTGTTA-----                                                               | GTACAA--            | CTACTAA--                                    | CATAG----- | TTACACGGT----- | GTTTAAACCGTG |       |       |  |
|                                                     |         |                                                                               | Section 1057        |                                              |            |                |              |       |       |  |
| Autographa californica nucleopolyhedrovirus NC 0... | (81313) | 81313                                                                         | 81323               | 81334                                        | 81345      | 81356          | 81367        | 81378 | 81389 |  |
|                                                     | (81275) | TCAAAAATCTGTCTGTACACCGTGTTCATTAATCGTCCACGTACAGCGGCTTGTTGTAAACAA               | TTAACATT            | TGTAG                                        |            |                |              |       |       |  |
|                                                     | (6756)  | TTT-GTACTAATTATATG-----                                                       | CTTATTCCTTACTTTA--- | TTGCTACAA                                    | TTGT       | -GTACTTT-----  | TACTAG       |       |       |  |

SARS-CoV-2 & Autographa californica nucleopolyhedrovirus.apr

|                                                     |         |                                                                                     |       |       |       |       |       |       |       |
|-----------------------------------------------------|---------|-------------------------------------------------------------------------------------|-------|-------|-------|-------|-------|-------|-------|
|                                                     |         | Section 1058                                                                        |       |       |       |       |       |       |       |
| Autographa californica nucleopolvhedrovirus NC 0... | (81390) | 81390                                                                               | 81400 | 81411 | 81422 | 81433 | 81444 | 81455 | 81466 |
|                                                     | (81352) | TTGCTTCATACTTTAGCAGCCCTTGGTATTTTCTGCTCTTGGATTCGCTCTTGCTCGAATCGGCATGCTTCTTAAAT       |       |       |       |       |       |       |       |
|                                                     | (6817)  | AAGTACA-----AATTCTAGAA--TTAAGCATCTATGCCGACTACTATAGCAAAAGAACTACTGTAAAG-AGTGTCT       |       |       |       |       |       |       |       |
|                                                     |         | Section 1059                                                                        |       |       |       |       |       |       |       |
| Autographa californica nucleopolvhedrovirus NC 0... | (81467) | 81467                                                                               | 81477 | 81488 | 81499 | 81510 | 81521 | 81532 | 81543 |
|                                                     | (81429) | GTACGACTCGCTGCATTCTTTTCAACTCGTTGATAGTGTACAACATGCGAGTTGAGTTTGCTTCACCTTCCTTGTTCGCTTCG |       |       |       |       |       |       |       |
|                                                     | (6884)  | GGTA--AATTTTGTCTAG---AGGCTTCATTT-----AATTATTTGAAGTC-ACCTAATTTTCTTAAACTG-ATTAA       |       |       |       |       |       |       |       |
|                                                     |         | Section 1060                                                                        |       |       |       |       |       |       |       |
| Autographa californica nucleopolvhedrovirus NC 0... | (81544) | 81544                                                                               | 81554 | 81565 | 81576 | 81587 | 81598 | 81609 | 81620 |
|                                                     | (81506) | TTTCCTTGTGGACTCTCCGCTGTGGTTGTCAATCGTCAACATTTGTGCATCAACACCAATAATGTCACACAGCTCAAAA     |       |       |       |       |       |       |       |
|                                                     | (6948)  | ATATTATTAATTGGTTTCTAATTAAGTGTTGCGCT-AGGTTCTTTA-ATCTACCTCAAACCTGCTGCTTTAGGT--GT      |       |       |       |       |       |       |       |
|                                                     |         | Section 1061                                                                        |       |       |       |       |       |       |       |
| Autographa californica nucleopolvhedrovirus NC 0... | (81621) | 81621                                                                               | 81631 | 81642 | 81653 | 81664 | 81675 | 81686 | 81697 |
|                                                     | (81583) | AACGACGACTTGCCCGAACCCTGGTTCGCCGGGCATGTAAATAGCTCTTCTTTCCGTAAATCTACGGGAATGGCCAAACT    |       |       |       |       |       |       |       |
|                                                     | (7021)  | TTTAATGTCTAATTTTAGG--CATGC-----CTTCTTACTGT--ACTGGTTACAGAGAAAGGCTATTTGAACCTCTACTA    |       |       |       |       |       |       |       |
|                                                     |         | Section 1062                                                                        |       |       |       |       |       |       |       |
| Autographa californica nucleopolvhedrovirus NC 0... | (81698) | 81698                                                                               | 81708 | 81719 | 81730 | 81741 | 81752 | 81763 | 81774 |
|                                                     | (81660) | AGCGGCGAATATGCACTCAACATAATCGCTTCGCGTGATTTAAATTTGGTGAAGCGTTTAAAGTACAAATAGCCTTCGA     |       |       |       |       |       |       |       |
|                                                     | (7089)  | ATGTCACTATTGCAACCTACTGTACTGTGTTCTATACCTTGTAGTGTTTGTCTTAGTGGTTTAGATTCTTTAGACACC      |       |       |       |       |       |       |       |
|                                                     |         | Section 1063                                                                        |       |       |       |       |       |       |       |
| Autographa californica nucleopolvhedrovirus NC 0... | (81775) | 81775                                                                               | 81785 | 81796 | 81807 | 81818 | 81829 | 81840 | 81851 |
|                                                     | (81737) | CAATCTTCTTCAAAATATGTACGAGTACTCCTTCAAGTCCACTTTGGACATGATGATGCGCATGTAGAATCGAGTC        |       |       |       |       |       |       |       |
|                                                     | (7166)  | TATCCTTCTTAGAAACTA-TACAAATTA-----CAATTT---CATC-TTTT-AAATGGGATTAAATCG--CTTT          |       |       |       |       |       |       |       |
|                                                     |         | Section 1064                                                                        |       |       |       |       |       |       |       |
| Autographa californica nucleopolvhedrovirus NC 0... | (81852) | 81852                                                                               | 81862 | 81873 | 81884 | 81895 | 81906 | 81917 | 81928 |
|                                                     | (81814) | AGCCAAGTGGCAAAATCGTCCGTGCTGCGCGCCAAATATGATTTTGTCCCAACACACA-TTGTACTTCTTCAGATCA       |       |       |       |       |       |       |       |
|                                                     | (7229)  | GGCTTAGTTGCAGAGTGGTTTTTGGCATATATTCTTTTCACTAGGTTTTTCTATGTACTTGGATTGGCTGCA----A       |       |       |       |       |       |       |       |



## SARS-CoV-2 &amp; Autographa californica nucleopolyhedrovirus.apr

|                                                     |         |                       |            |              |             |             |             |            |            |           |           |
|-----------------------------------------------------|---------|-----------------------|------------|--------------|-------------|-------------|-------------|------------|------------|-----------|-----------|
|                                                     |         | Section 1065          |            |              |             |             |             |            |            |           |           |
| Autographa californica nucleopolyhedrovirus NC 0... | (81929) | 81929                 | 81939      | 81950        | 81961       | 81972       | 81983       | 81994      | 82005      |           |           |
|                                                     | (81890) | TTAACGCGTTCGGCGTGGTGC | GTGTAA     | AAATTTG      | AAATGTTATCC | GATTCTTCAA  | ACTGAAC     | ATCGGGTT   | CACGT      | GCAT      |           |
|                                                     | (7302)  | TTCATGCAATTGTTTTCAGC  | TATTTG     | C--AGT       | ACATTTAT    | TAGT--      | AATTCTTG    | GCTTATGT   | GGTT--     | AATAA--   |           |
|                                                     |         | Section 1066          |            |              |             |             |             |            |            |           |           |
| Autographa californica nucleopolyhedrovirus NC 0... | (82006) | 82006                 | 82016      | 82027        | 82038       | 82049       | 82060       | 82071      | 82082      |           |           |
|                                                     | (81967) | ACATCATCGCGCAA        | TTTCGGTTAA | AAACAAAC     | GTTTATCATTA | AACTGTGCCAT | CAACATGT    | CGACATATTC | GATTTT     |           |           |
|                                                     | (7371)  | -----T                | TAATC      | TTGTAC       | AAATG       | CCCCGATTT   | CAGCT       | ATGGT      | TAGAA      | TGTA      | CAT----   |
|                                                     |         | Section 1067          |            |              |             |             |             |            |            |           |           |
| Autographa californica nucleopolyhedrovirus NC 0... | (82083) | 82083                 | 82093      | 82104        | 82115       | 82126       | 82137       | 82148      | 82159      |           |           |
|                                                     | (82044) | GTGAATTGTT            | CGATACAAG  | TACTGA       | ATAATTTT    | GTTGTGTTCT  | TTTGGA      | AAAAAA     | CTCTCCG    | TGTTGG    | TTAACA    |
|                                                     | (7421)  | -----                 | TTCT       | TG           | CAT-----    | C--AT       | TTTTATTAT   | GATGGAA    | -AAGTTA    | TGTGCA    | TGTTGT    |
|                                                     |         | Section 1068          |            |              |             |             |             |            |            |           |           |
| Autographa californica nucleopolyhedrovirus NC 0... | (82160) | 82160                 | 82170      | 82181        | 82192       | 82203       | 82214       | 82225      | 82236      |           |           |
|                                                     | (82121) | CGCTPGT               | TCGTGCGAA  | TCAACGT      | GGTCGACACG  | TACG        | TTTTGTTAGT  | AAAAATT    | AGCATC     | AAATC     | AATT      |
|                                                     | (7472)  | GGTTGTT               | AATTCATCA  | AA-CTT       | GTATGATGTGT | -TAC        | AAACGTAATAG | AGCAACA    | AGAGTC     | GAAATGT   | ACAACTAT  |
|                                                     |         | Section 1069          |            |              |             |             |             |            |            |           |           |
| Autographa californica nucleopolyhedrovirus NC 0... | (82237) | 82237                 | 82247      | 82258        | 82269       | 82280       | 82291       | 82302      | 82313      |           |           |
|                                                     | (82198) | TC                    | TGCATCGTT  | ACCGAA       | CATGTC      | -CGCCAT     | CAAGC       | AGACTTTT   | AGCGCTTT   | TCTATT    | GATCTTTA  |
|                                                     | (7547)  | AA                    | TGGTGTTAG  | AAGGTC       | CTTTTATGT   | CTATG---    | CTAA        | TGGAGGTAA  | AGGCTTT    | TGCAAA    | C----TACA |
|                                                     |         | Section 1070          |            |              |             |             |             |            |            |           |           |
| Autographa californica nucleopolyhedrovirus NC 0... | (82314) | 82314                 | 82324      | 82335        | 82346       | 82357       | 82368       | 82379      | 82390      |           |           |
|                                                     | (82274) | ATT                   | TGCATTTT   | TGTCGAGATCC  | CGATAC      | CGTTGACCGA  | CACGGTT     | TGCA       | ACAT       | TGTC      | GGAAC     |
|                                                     | (7617)  | ATT                   | GTGTAA     | TTGTGATACATT | CTGTG       | CTGGTAGTAC  | ATTTAT      | TAGTGA     | ATGAAGTTGC | GAGAG     | ACTTGT    |
|                                                     |         | Section 1071          |            |              |             |             |             |            |            |           |           |
| Autographa californica nucleopolyhedrovirus NC 0... | (82391) | 82391                 | 82401      | 82412        | 82423       | 82434       | 82445       | 82456      | 82467      |           |           |
|                                                     | (82351) | CTGT                  | TCTTGT     | TTACGT       | ACAGAG      | CGAGCT      | TAATCAGAT   | TTTCAT     | CGTCC      | AAAT      | TCCACAA   |
|                                                     | (7692)  | AGTT                  | -----      | TAA          | AAGACCA     | ATAAAT      | CT-----     | ACTGA--    | CAGTCT     | TTCT----- | TACAT     |

SARS-CoV-2 & Autographa californica nucleopolyhedrovirus.apr

|                                                     |         |              |                  |                |            |                |                 |                  |                         |             |          |           |      |       |       |      |  |
|-----------------------------------------------------|---------|--------------|------------------|----------------|------------|----------------|-----------------|------------------|-------------------------|-------------|----------|-----------|------|-------|-------|------|--|
|                                                     |         | Section 1072 |                  |                |            |                |                 |                  |                         |             |          |           |      |       |       |      |  |
| Autographa californica nucleopolyhedrovirus NC 0... | (82468) | 82468        | 82478            | 82489          | 82500      | 82511          | 82522           | 82533            | 82544                   |             |          |           |      |       |       |      |  |
|                                                     | (82428) | TAA          | GCGA             | CTCGCATATCGGCT | TGGCATGTGT | TGCAAT         | TGCCC           | ATGTAGT          | TAACTATGGCCG            | TGTTAGTTT   | TAGCA    |           |      |       |       |      |  |
|                                                     | (7747)  | TACAGT       | GAGAATGGT        | -----          | TCCATCC-A  | TCTTTACT       | TTTG-ATAAAGCT   | TGGTC            | AAAAGAC                 | TT--A--     | TGAAGA   |           |      |       |       |      |  |
|                                                     |         | Section 1073 |                  |                |            |                |                 |                  |                         |             |          |           |      |       |       |      |  |
| Autographa californica nucleopolyhedrovirus NC 0... | (82545) | 82545        | 82555            | 82566          | 82577      | 82588          | 82599           | 82610            | 82621                   |             |          |           |      |       |       |      |  |
|                                                     | (82505) | TT           | TTTAC            | CATCTCGGCACAT  | TTTGG      | CAGATGT        | GATAAGTTCTATAAA | TGCTGAGCTCGTC    | GGCGCTAGTA              | GATAGCATG   |          |           |      |       |       |      |  |
|                                                     | (7811)  | CA           | TTCTCTCTCTCATTTT | GGTTA-AC--     | TTAGA      | CAA-CCTGAGAGCT | TAAATAACACTAAA  | GGTT             | CAT--T                  | GCCTATTAA   |          |           |      |       |       |      |  |
|                                                     |         | Section 1074 |                  |                |            |                |                 |                  |                         |             |          |           |      |       |       |      |  |
| Autographa californica nucleopolyhedrovirus NC 0... | (82622) | 82622        | 82632            | 82643          | 82654      | 82665          | 82676           | 82687            | 82698                   |             |          |           |      |       |       |      |  |
|                                                     | (82582) | TAA          | TAAACGCGT        | CCTCGGGCAAAT   | ACTTTTCGTC | GGTGGGCTTCT    | TGAATGTCTGCG    | GCAACGT          | TGGTGCCCA               | ACAA        |          |           |      |       |       |      |  |
|                                                     | (7882)  | TGT          | TATAGTTTT        | TGATGGTA----   | ATCAAAATGT | GAA            | GAATCATCTG      | CAAAATCAGC       | GTCTGT                  | TTAC--TAC   | AGT-     |           |      |       |       |      |  |
|                                                     |         | Section 1075 |                  |                |            |                |                 |                  |                         |             |          |           |      |       |       |      |  |
| Autographa californica nucleopolyhedrovirus NC 0... | (82699) | 82699        | 82709            | 82720          | 82731      | 82742          | 82753           | 82764            | 82775                   |             |          |           |      |       |       |      |  |
|                                                     | (82659) | AAATG        | GACAGCT          | CGAATGAAAGCT   | TGT        | TGGTGAACACGT   | TGTACACACC      | GTGCGT           | TGTCAAGTAC              | AAGTATT     | TCCAAT   |           |      |       |       |      |  |
|                                                     | (7952)  | ---          | CAGC-TTAT        | TGTGTCAACCTAT  | TACTG      | -----TTACTAG   | ATCA---GGCAT    | TAGT--GTCTGT     | ATGTGGT                 | TGATAG      |          |           |      |       |       |      |  |
|                                                     |         | Section 1076 |                  |                |            |                |                 |                  |                         |             |          |           |      |       |       |      |  |
| Autographa californica nucleopolyhedrovirus NC 0... | (82776) | 82776        | 82786            | 82797          | 82808      | 82819          | 82830           | 82841            | 82852                   |             |          |           |      |       |       |      |  |
|                                                     | (82736) | TG           | TTAAATTT         | TATGTTG        | CTCAA      | CTGTAAACAAT    | TGCTTTGGT       | CAA              | TTTGAATAGGTCATCCTCTTTCT | TTTACAATT   |          |           |      |       |       |      |  |
|                                                     | (8014)  | TGCGG        | AAAGTT---        | GCAGT          | TAAAT      | TGTTGATGCT     | TACGTTAAATACG   | TTT-T----        | CATCAA-----             | CTTTTA---   |          |           |      |       |       |      |  |
|                                                     |         | Section 1077 |                  |                |            |                |                 |                  |                         |             |          |           |      |       |       |      |  |
| Autographa californica nucleopolyhedrovirus NC 0... | (82853) | 82853        | 82863            | 82874          | 82885      | 82896          | 82907           | 82918            | 82929                   |             |          |           |      |       |       |      |  |
|                                                     | (82813) | TGA          | TAAATGT          | TTGCCGTTG      | AAAA       | CAAA           | TTGACTCC        | GGTCACTACGTTTTTC | CAATTTTCTA              | AA          | GAAATCC  | TTTACACAC |      |       |       |      |  |
|                                                     | (8073)  | ACG          | TACCAAT          | T---G          | AAAA       | AACTCA         | AAA             | CACTAGTTGCA--    | ACTGCAGAAG              | CTGAAC      | TGCAAG   | AATGTGTC  | TTAG |       |       |      |  |
|                                                     |         | Section 1078 |                  |                |            |                |                 |                  |                         |             |          |           |      |       |       |      |  |
| Autographa californica nucleopolyhedrovirus NC 0... | (82930) | 82930        | 82940            | 82951          | 82962      | 82973          | 82984           | 82995            | 83006                   |             |          |           |      |       |       |      |  |
|                                                     | (82890) | AATG         | T                | CAGGCGG        | CAAGT      | TT             | AGCGCCATCACAT   | TC               | TCGTACGTG               | TACGCCCACA  | ATTCAT   | TCGT      | GATC | CAAAA | TT    | TCGT |  |
|                                                     | (8145)  | ACAA         | TGTCTTAT         | CT-AC          | TTT        | TTATTT         | CAGCAGC         | TCGGCA           | AGGGT                   | TTGTTGATTCA | GATGTA-- | GAAAC     | T    | AAA   | GATGT |      |  |

SARS-CoV-2 & Autographa californica nucleopolyhedrovirus.apr

|                                                     |         |              |       |          |       |        |            |        |          |      |         |       |         |           |      |     |       |      |     |     |     |      |     |    |    |    |    |    |    |    |    |    |    |    |    |    |   |   |   |
|-----------------------------------------------------|---------|--------------|-------|----------|-------|--------|------------|--------|----------|------|---------|-------|---------|-----------|------|-----|-------|------|-----|-----|-----|------|-----|----|----|----|----|----|----|----|----|----|----|----|----|----|---|---|---|
|                                                     |         | Section 1079 |       |          |       |        |            |        |          |      |         |       |         |           |      |     |       |      |     |     |     |      |     |    |    |    |    |    |    |    |    |    |    |    |    |    |   |   |   |
| Autographa californica nucleopolyhedrovirus NC 0... | (83007) | 83007        | 83017 | 83028    | 83039 | 83050  | 83061      | 83072  | 83083    |      |         |       |         |           |      |     |       |      |     |     |     |      |     |    |    |    |    |    |    |    |    |    |    |    |    |    |   |   |   |
|                                                     | (82967) | T            | TTT   | AGCCGAC  | TGAGT | CAAA   | TATATCATGT | AGTGT  | ATGCC    | AAAA | TAA     | TAGCC | CAAC    | GATACGCAC | AAT  | TTT | TGGTA | TC   | G   |     |     |      |     |    |    |    |    |    |    |    |    |    |    |    |    |    |   |   |   |
|                                                     | (8219)  | G            | TT    | GAATGTCT | TAAAT | -T-G   | TACATCAA   | TCTGAC | ATAGA    | AG-- | TT      | ACTGG | CGATAGT | TGTAATA   | AC   | TAT | TATGC | TC   | A   |     |     |      |     |    |    |    |    |    |    |    |    |    |    |    |    |    |   |   |   |
|                                                     |         | Section 1080 |       |          |       |        |            |        |          |      |         |       |         |           |      |     |       |      |     |     |     |      |     |    |    |    |    |    |    |    |    |    |    |    |    |    |   |   |   |
| Autographa californica nucleopolyhedrovirus NC 0... | (83084) | 83084        | 83094 | 83105    | 83116 | 83127  | 83138      | 83149  | 83160    |      |         |       |         |           |      |     |       |      |     |     |     |      |     |    |    |    |    |    |    |    |    |    |    |    |    |    |   |   |   |
|                                                     | (83044) | T            | CA    | AAGT     | CAAA  | CCAATG | ATTGCAGGC  | C      | TATTAA   | AC   | ACTA    | TTT   | TCTCTT  | GT        | TTT  | TGT | TAAG  | GCT  | CAC | ATC | GCT | T    | CAA |    |    |    |    |    |    |    |    |    |    |    |    |    |   |   |   |
|                                                     | (8292)  | C            | T     | A        | TAA   | CAAA   | GTTGAA     | A      | ACATGACA | C    | -CCCGTG | AC    | ---     | C         | TT   | G   | GTG   | CTT  | GT  | T   | GAC | T    | G   | T  | A  | G  | T  | G  | C  | G  | C  | T  | C  | A  | T  | A  | A |   |   |
|                                                     |         | Section 1081 |       |          |       |        |            |        |          |      |         |       |         |           |      |     |       |      |     |     |     |      |     |    |    |    |    |    |    |    |    |    |    |    |    |    |   |   |   |
| Autographa californica nucleopolyhedrovirus NC 0... | (83161) | 83161        | 83171 | 83182    | 83193 | 83204  | 83215      | 83226  | 83237    |      |         |       |         |           |      |     |       |      |     |     |     |      |     |    |    |    |    |    |    |    |    |    |    |    |    |    |   |   |   |
|                                                     | (83121) | A            | G     | CTT      | CA    | TTCA   | AAAGCTTCT  | T      | TGTCG    | CA   | GGCAAA  | T     | A       | T         | GATT | CA  | CA    | AAAG | T   | T   | CC  | AAAA | CA  | G  | TT | T  | G  | A  | T  | G  | C  | G  | G  | T  | T  |    |   |   |   |
|                                                     | (8365)  | T            | G     | C        | -G    | CA     | GGT        | A      | G        | CA   | AAAAAG  | T     | C       | A         | CA   | CA  | CA    | CA   | CA  | CA  | CA  | CA   | CA  | CA | CA | CA | CA | CA | CA | CA | CA | CA | CA | CA | CA | CA |   |   |   |
|                                                     |         | Section 1082 |       |          |       |        |            |        |          |      |         |       |         |           |      |     |       |      |     |     |     |      |     |    |    |    |    |    |    |    |    |    |    |    |    |    |   |   |   |
| Autographa californica nucleopolyhedrovirus NC 0... | (83238) | 83238        | 83248 | 83259    | 83270 | 83281  | 83292      | 83303  | 83314    |      |         |       |         |           |      |     |       |      |     |     |     |      |     |    |    |    |    |    |    |    |    |    |    |    |    |    |   |   |   |
|                                                     | (83198) | C            | T     | C        | T     | G      | T          | A      | C        | G    | A       | AAAT  | TTT     | -T        | C    | G   | T     | T    | C   | T   | T   | G    | G   | T  | C  | A  | A  | T  | A  | T  | T  | T  | T  | A  | A  | T  | T |   |   |
|                                                     | (8438)  | -            | C     | T        | A     | C      | G          | A      | AA       | A    | CA      | AAAT  | AC      | G         | T    | A   | G     | T    | G   | C   | T   | A    | A   | A  | GA | AA | T  | A  | A  | A  | A  | A  | A  | A  | A  | A  | A |   |   |
|                                                     |         | Section 1083 |       |          |       |        |            |        |          |      |         |       |         |           |      |     |       |      |     |     |     |      |     |    |    |    |    |    |    |    |    |    |    |    |    |    |   |   |   |
| Autographa californica nucleopolyhedrovirus NC 0... | (83315) | 83315        | 83325 | 83336    | 83347 | 83358  | 83369      | 83380  | 83391    |      |         |       |         |           |      |     |       |      |     |     |     |      |     |    |    |    |    |    |    |    |    |    |    |    |    |    |   |   |   |
|                                                     | (83274) | G            | C     | T        | T     | T      | T          | T      | T        | C    | A       | A     | G       | T         | A    | T   | T     | G    | T   | A   | G   | A    | A   | G  | T  | T  | G  | G  | G  | T  | C  | G  | C  | A  | A  | A  | A |   |   |
|                                                     | (8503)  | -            | -     | -        | -     | -      | -          | -      | -        | T    | A       | -     | -       | -         | -    | -   | -     | -    | -   | -   | -   | -    | -   | -  | -  | -  | -  | -  | -  | -  | -  | -  | -  | -  | -  | -  |   |   |   |
|                                                     |         | Section 1084 |       |          |       |        |            |        |          |      |         |       |         |           |      |     |       |      |     |     |     |      |     |    |    |    |    |    |    |    |    |    |    |    |    |    |   |   |   |
| Autographa californica nucleopolyhedrovirus NC 0... | (83392) | 83392        | 83402 | 83413    | 83424 | 83435  | 83446      | 83457  | 83468    |      |         |       |         |           |      |     |       |      |     |     |     |      |     |    |    |    |    |    |    |    |    |    |    |    |    |    |   |   |   |
|                                                     | (83351) | C            | G     | T        | G     | A      | A          | A      | T        | T    | G       | C     | T       | T         | G    | A   | T     | T    | G   | C   | T   | T    | G   | A  | T  | T  | G  | C  | T  | G  | C  | G  | A  | T  | A  | T  | G | G | G |
|                                                     | (8555)  | -            | -     | -        | -     | -      | -          | -      | -        | A    | -       | -     | -       | -         | -    | -   | -     | -    | -   | -   | -   | -    | -   | -  | -  | -  | -  | -  | -  | -  | -  | -  | -  | -  | -  | -  | - |   |   |
|                                                     |         | Section 1085 |       |          |       |        |            |        |          |      |         |       |         |           |      |     |       |      |     |     |     |      |     |    |    |    |    |    |    |    |    |    |    |    |    |    |   |   |   |
| Autographa californica nucleopolyhedrovirus NC 0... | (83469) | 83469        | 83479 | 83490    | 83501 | 83512  | 83523      | 83534  | 83545    |      |         |       |         |           |      |     |       |      |     |     |     |      |     |    |    |    |    |    |    |    |    |    |    |    |    |    |   |   |   |
|                                                     | (83428) | A            | C     | G        | A     | T      | G          | C      | G        | C    | G       | G     | T       | T         | C    | T   | G     | G    | A   | A   | C   | G    | C   | G  | T  | G  | T  | C  | G  | C  | A  | C  | A  | C  | T  | C  | T | C |   |
|                                                     | (8618)  | G            | C     | T        | A     | T      | T          | T      | C        | T    | A       | T     | T       | T         | A    | A   | C     | A    | C   | A   | C   | A    | C   | A  | C  | A  | C  | A  | C  | A  | C  | A  | C  | A  | C  | A  | C | A |   |

## SARS-CoV-2 &amp; Autographa californica nucleopolyhedrovirus.apr

|                                                     |         |              |            |          |         |          |              |          |           |
|-----------------------------------------------------|---------|--------------|------------|----------|---------|----------|--------------|----------|-----------|
|                                                     |         | Section 1086 |            |          |         |          |              |          |           |
| Autographa californica nucleopolyhedrovirus NC 0... | (83546) | 83546        | 83556      | 83567    | 83578   | 83589    | 83600        | 83611    | 83622     |
|                                                     | (83505) | GAGGCTTT     | TGAGGT     | TGACGT   | TGACGAT | TATGCTTG | TACTTGGGCACC | GTAATGCA | TTCTTCAA  |
|                                                     | (8690)  | TACAAGGC     | TATTGAT    | TGTTGG   | TGTCAC  | TCTGACAT | TATGCACT     | TGTTTAA  | CA---AA   |
|                                                     |         | Section 1087 |            |          |         |          |              |          |           |
| Autographa californica nucleopolyhedrovirus NC 0... | (83623) | 83623        | 83633      | 83644    | 83655   | 83666    | 83677        | 83688    | 83699     |
|                                                     | (83582) | TAAATGTA     | ATTGAAA    | AAATTTT  | TATCCG  | AATTGA   | CCAGCT       | CGCCATTA | ACTTTG    |
|                                                     | (8762)  | GATTTTGA     | CAC---A    | TGGTTT   | AGCCAG  | -----    | CGTGGT       | GGTAGTTA | --TACTAA  |
|                                                     |         | Section 1088 |            |          |         |          |              |          |           |
| Autographa californica nucleopolyhedrovirus NC 0... | (83700) | 83700        | 83710      | 83721    | 83732   | 83743    | 83754        | 83765    | 83776     |
|                                                     | (83659) | ATTTTGTAG    | TATAAACAA  | GTCTTCGT | GAGAA   | TGGTCA   | AACTTGGT     | TTTTTCC  | ATTTACAA  |
|                                                     | (8822)  | TT-----      | GA--TT     | GCT--G   | CA----  | TGATAA   | CAAG---A     | GAAGT    | GGGTTT    |
|                                                     |         | Section 1089 |            |          |         |          |              |          |           |
| Autographa californica nucleopolyhedrovirus NC 0... | (83777) | 83777        | 83787      | 83798    | 83809   | 83820    | 83831        | 83842    | 83853     |
|                                                     | (83736) | GTGATTCG     | TGCGCAGG   | CTGAGCTC | GACGT   | TGAGAAA  | CATTTAGGGT   | CAACAA   | CAAAATCC  |
|                                                     | (8877)  | GCACGATA     | TACGCACA   | ACTAATG  | --GT    | GACTTTTT | TGCATTT      | CTAGAG   | TTTTTAA   |
|                                                     |         | Section 1090 |            |          |         |          |              |          |           |
| Autographa californica nucleopolyhedrovirus NC 0... | (83854) | 83854        | 83864      | 83875    | 83886   | 83897    | 83908        | 83919    | 83930     |
|                                                     | (83813) | TTTGTGTG     | TGTATGATT  | GGTATCGT | GGGTT   | CGATGACA | ATTCCAA      | ATTTTAT  | ATTTTAAA  |
|                                                     | (8949)  | ---TCTGT     | TACACACCAT | CAAACT   | TATAG-A | GTACAC   | --TGACT---   | TGCAAC   | ATCAGCTT  |
|                                                     |         | Section 1091 |            |          |         |          |              |          |           |
| Autographa californica nucleopolyhedrovirus NC 0... | (83931) | 83931        | 83941      | 83952    | 83963   | 83974    | 83985        | 83996    | 84007     |
|                                                     | (83890) | AAAGAGAA     | AGCTTGC    | TTTGGGCC | AGTTGGG | CAATAA   | TAGTAATC     | GCCCGT   | TGCA      |
|                                                     | (9012)  | C--TGCTG     | AATGTACA   | AAATTT   | TAAAGA  | TGCTTCT  | GTAAAGC      | --C--AG  | -----     |
|                                                     |         | Section 1092 |            |          |         |          |              |          |           |
| Autographa californica nucleopolyhedrovirus NC 0... | (84008) | 84008        | 84018      | 84029    | 84040   | 84051    | 84062        | 84073    | 84084     |
|                                                     | (83967) | AGGGTCGGT    | GCTCTT     | GAA      | AAAATCT | TCAAAAT  | TAAAT        | TACTTT   | TGATGAT   |
|                                                     | (9073)  | -CAATGT      | ACTA---    | GAA      | GGTTCTG | TGCTTAT  | GAAAG        | -----    | TTACGCCCT |

SARS-CoV-2 & Autographa californica nucleopolyhedrovirus.apr

|                                                     |         |              |              |             |            |             |                         |             |            |         |             |        |         |        |               |        |       |           |          |           |           |      |      |          |         |
|-----------------------------------------------------|---------|--------------|--------------|-------------|------------|-------------|-------------------------|-------------|------------|---------|-------------|--------|---------|--------|---------------|--------|-------|-----------|----------|-----------|-----------|------|------|----------|---------|
|                                                     |         | Section 1093 |              |             |            |             |                         |             |            |         |             |        |         |        |               |        |       |           |          |           |           |      |      |          |         |
| Autographa californica nucleopolyhedrovirus NC 0... | (84085) | 84085        | 84095        | 84106       | 84117      | 84128       | 84139                   | 84150       | 84161      |         |             |        |         |        |               |        |       |           |          |           |           |      |      |          |         |
|                                                     | (84044) | GTTT         | TACAAAAATGC  | AAAAAT      | CGTTACTTTC | CAACACCCAGT | CGTGCCGTCTAATGTTTGAGCTG | CGTGTTTCTCT | T          |         |             |        |         |        |               |        |       |           |          |           |           |      |      |          |         |
|                                                     | (9136)  | G            | GATGGCT----- | CTATTAT     | T-----     | CAATTTCC    | TAA                     | C-----AC    | CTACC----T | T       |             |        |         |        |               |        |       |           |          |           |           |      |      |          |         |
|                                                     |         | Section 1094 |              |             |            |             |                         |             |            |         |             |        |         |        |               |        |       |           |          |           |           |      |      |          |         |
| Autographa californica nucleopolyhedrovirus NC 0... | (84162) | 84162        | 84172        | 84183       | 84194      | 84205       | 84216                   | 84227       | 84238      |         |             |        |         |        |               |        |       |           |          |           |           |      |      |          |         |
|                                                     | (84171) | G            | CAGGTT--CTTC | G           | TGTGTC     | TTTCGC      | AAGAT                   | TGCGCC      | CATGTCGT   | GTTTCGC | G           | CAC    | GG      | AC     | CG            | TTAAAG | TTG   | TTTCTAATT |          |           |           |      |      |          |         |
|                                                     | (9173)  | GA           | AGGTTCTG     | TTAG        | AGTGG      | T           | AACA                    | ACTT        | TGATT      | CT----- | GAGT        | ACT    | G       | TAG    | GG            | CAC    | GG    | CACTT     | G        | TG        | AAAGATCAG |      |      |          |         |
|                                                     |         | Section 1095 |              |             |            |             |                         |             |            |         |             |        |         |        |               |        |       |           |          |           |           |      |      |          |         |
| Autographa californica nucleopolyhedrovirus NC 0... | (84239) | 84239        | 84249        | 84260       | 84271      | 84282       | 84293                   | 84304       | 84315      |         |             |        |         |        |               |        |       |           |          |           |           |      |      |          |         |
|                                                     | (84196) | GT           | G            | TTTAA       | GA         | ACTGT       | TGAAAGT                 | TGTT        | GAC        | GTA     | CTCAAAC     | AAT    | CTAC    | GTGTTT | CCTG          | TT     | CGCGT | GTT       | TCT      | AATGATTAA | A         |      |      |          |         |
|                                                     | (9243)  | AA           | G            | C           | TGGT       | G           | TTTGTG                  | TATCTAC     | TA--       | G       | TG          | GTA    | GATGGGT | ACT    | TAAC          | A----  | ATGA  | TT        | ATTACAGA | TCT       | TTACCAGGA | A    |      |          |         |
|                                                     |         | Section 1096 |              |             |            |             |                         |             |            |         |             |        |         |        |               |        |       |           |          |           |           |      |      |          |         |
| Autographa californica nucleopolyhedrovirus NC 0... | (84316) | 84316        | 84326        | 84337       | 84348      | 84359       | 84370                   | 84381       | 84392      |         |             |        |         |        |               |        |       |           |          |           |           |      |      |          |         |
|                                                     | (84273) | ATGA         | TTT          | GCATCT      | TG         | CAG         | GT                      | TGT         | TAA        | AT      | CTCGTACGTTT | TG     | CTT     | GAG    | G             | CAG    | TTT   | TTCAA     | AAAA     | AA        | AT        | TG   | TAA  | AT       | GT      |
|                                                     | (9314)  | ---          | G            | TTT         | ---        | TC          | TG                      | --          | TG         | TGT     | AG          | AT     | -----   | GCT    | G             | TAA    | TTT   | ACTT      | ACT      | AA        | AT        | AT   | GT   | TTA      | ----    |
|                                                     |         | Section 1097 |              |             |            |             |                         |             |            |         |             |        |         |        |               |        |       |           |          |           |           |      |      |          |         |
| Autographa californica nucleopolyhedrovirus NC 0... | (84393) | 84393        | 84403        | 84414       | 84425      | 84436       | 84447                   | 84458       | 84469      |         |             |        |         |        |               |        |       |           |          |           |           |      |      |          |         |
|                                                     | (84350) | TGTCAAT      | CATG         | T           | TGGCT      | AT          | C                       | G           | T          | GTT     | T           | G      | TACT    | T      | TTCGTGTTAATT  | TAT    | TTA   | AATAAT    | TTC      | GAT       | CA        | AAAA | TC   | ACCATCCA | A       |
|                                                     | (9360)  | --           | CACCA        | CTAA        | T---       | TC          | A                       | C           | CTA        | --      | T           | --     | GG      | TGC    | -----         | TTT    | GG    | ACA       | TAT      | CAG       | --        | CA   | ---- | TC       | -TATAGT |
|                                                     |         | Section 1098 |              |             |            |             |                         |             |            |         |             |        |         |        |               |        |       |           |          |           |           |      |      |          |         |
| Autographa californica nucleopolyhedrovirus NC 0... | (84470) | 84470        | 84480        | 84491       | 84502      | 84513       | 84524                   | 84535       | 84546      |         |             |        |         |        |               |        |       |           |          |           |           |      |      |          |         |
|                                                     | (84427) | TTCTTACA     | TAGA         | ATAG        | A          | A           | CGCTAA                  | TA          | CA         | AG      | ATT         | CAACAA | CAC     | ATT    | GTTGTTTGGCGCG | TAT    | G     | TACA      | GAT      | TTAC      | GA        |      |      |          |         |
|                                                     | (9410)  | GCTGGTGG     | T---         | ATT         | G          | T           | AGCTA                   | TCG         | TAGTA      | -       | ACAT        | GCCTTG | CTACT   | -----  | ATT           | TT     | TAT   | GAG       | GT       | --        | TAGA      | GA   |      |          |         |
|                                                     |         | Section 1099 |              |             |            |             |                         |             |            |         |             |        |         |        |               |        |       |           |          |           |           |      |      |          |         |
| Autographa californica nucleopolyhedrovirus NC 0... | (84547) | 84547        | 84557        | 84568       | 84579      | 84590       | 84601                   | 84612       | 84623      |         |             |        |         |        |               |        |       |           |          |           |           |      |      |          |         |
|                                                     | (84504) | TTTAAGCAC    | G            | CCCGCCCGCAC | G          | GAACGA      | TTG                     | TT          | TAT        | TAT     | TG          | C      | CCCGGAA | AAT    | G             | TGGTG  | TT    | G         | TAT      | TAT       | TTTAACA   | AAA  |      |          |         |
|                                                     | (9470)  | AGAGCTTTT    | G            | TGAATACAGT  | CATGTAG    | TTG         | CC                      | T           | T          | AAT     | A-          | CTTT   | ----    | ACT    | AT            | TC     | -C    | TT        | AT       | GT        | CACTGT    | ACT  |      |          |         |

SARS-CoV-2 & Autographa californica nucleopolyhedrovirus.apr

|                                                     |         |                                                                                    |       |       |       |       |       |       |       |
|-----------------------------------------------------|---------|------------------------------------------------------------------------------------|-------|-------|-------|-------|-------|-------|-------|
|                                                     |         | Section 1100                                                                       |       |       |       |       |       |       |       |
| Autographa californica nucleopolyhedrovirus NC 0... | (84624) | 84624                                                                              | 84634 | 84645 | 84656 | 84667 | 84678 | 84689 | 84700 |
|                                                     | (84581) | CGCTCTATTATTACTTGGACTCGGCGAACGTGTTTTGTCCCAACGAGTTTACGCTGACCACGTTTCACGCAATCCACT     |       |       |       |       |       |       |       |
|                                                     | (9541)  | ----CTGTTTAACACC--AGTT--TACTCATCTTTACCTGGTGTTTATTCTGTATAT-----T                    |       |       |       |       |       |       |       |
|                                                     |         | Section 1101                                                                       |       |       |       |       |       |       |       |
| Autographa californica nucleopolyhedrovirus NC 0... | (84701) | 84701                                                                              | 84711 | 84722 | 84733 | 84744 | 84755 | 84766 | 84777 |
|                                                     | (84658) | ATTAAACGATCAACGAGACGGGAATATATGCCACCGCATGCACGCCGTGAGCAGCTTGACCGCTAATTGACATT         |       |       |       |       |       |       |       |
|                                                     | (9591)  | ACTTGTACT-----TG--ACATT--TT-ATCTTAC-----TATGATGTTTCTTTTTTAGCACATATTCAGTGGAT        |       |       |       |       |       |       |       |
|                                                     |         | Section 1102                                                                       |       |       |       |       |       |       |       |
| Autographa californica nucleopolyhedrovirus NC 0... | (84778) | 84778                                                                              | 84788 | 84799 | 84810 | 84821 | 84832 | 84843 | 84854 |
|                                                     | (84735) | TGCAACATTAAAAAATAACGTGC----CCGATCACACGCTCGTTCTCGATGTGGTCGACCAACAGATTTCAGTTTTCA     |       |       |       |       |       |       |       |
|                                                     | (9652)  | GGTTATGTTTCAACCTTTTAGTACCTTTCTGGATAACAATTGCT--TATATCATTTGTATTT-----CCA----CAA      |       |       |       |       |       |       |       |
|                                                     |         | Section 1103                                                                       |       |       |       |       |       |       |       |
| Autographa californica nucleopolyhedrovirus NC 0... | (84855) | 84855                                                                              | 84865 | 84876 | 84887 | 84898 | 84909 | 84920 | 84931 |
|                                                     | (84808) | ATACTCGACATTATCAATTAATTTGATTTACAAATGGCTACGTGGATTGTTGGCCGAATAACGCGTTATATAGACGCT     |       |       |       |       |       |       |       |
|                                                     | (9718)  | GC-ATTTCTATTGGTT--C-TTTAGTAATTACCTAAAG--AGACGTGTAGTCTTTAATGGTGTTTCCTTTAGTACT       |       |       |       |       |       |       |       |
|                                                     |         | Section 1104                                                                       |       |       |       |       |       |       |       |
| Autographa californica nucleopolyhedrovirus NC 0... | (84932) | 84932                                                                              | 84942 | 84953 | 84964 | 84975 | 84986 | 84997 | 85008 |
|                                                     | (84885) | GTACGTTTATCGTAGTAATCATTTTAAATACATTGTGATTGAACTAAACATACATCTGCAATGGGTGAACAGTCACTA     |       |       |       |       |       |       |       |
|                                                     | (9788)  | TTTGAAGAAGCTGCGCTGTGCACCTTTTGTGT-TAAATAAAGAAATGTATCTAAGT-TGCGTAGTGATGTGCTATTA      |       |       |       |       |       |       |       |
|                                                     |         | Section 1105                                                                       |       |       |       |       |       |       |       |
| Autographa californica nucleopolyhedrovirus NC 0... | (85009) | 85009                                                                              | 85019 | 85030 | 85041 | 85052 | 85063 | 85074 | 85085 |
|                                                     | (84962) | AAATTTTGCATGGAACACGGCGATAAAGAAGACAGCGACAATGAATAGAGTTTATATTTTTATTTAATAAATATTG       |       |       |       |       |       |       |       |
|                                                     | (9863)  | CCCTCTTAGCA--ATATAATAGATACCTTAGCTCTTTATAATAAGTACAAGTATTTTAGTGG-AGCAATGGAACAAC      |       |       |       |       |       |       |       |
|                                                     |         | Section 1106                                                                       |       |       |       |       |       |       |       |
| Autographa californica nucleopolyhedrovirus NC 0... | (85086) | 85086                                                                              | 85096 | 85107 | 85118 | 85129 | 85140 | 85151 | 85162 |
|                                                     | (85039) | TTTCGTATATCCATAATGTTTGTGTATTATTTCATGTGTGATAATGTTCCCAATCTTGACACGGGGGTGGGGCATCGTTTGA |       |       |       |       |       |       |       |
|                                                     | (9937)  | TAGCTACAGAGA--AGCTGCTGTGTT-TTCATCTCTGCAAGGCTCTCAATGACTTCAGTAACTCAGGTTCTGAT-GT      |       |       |       |       |       |       |       |

## SARS-CoV-2 &amp; Autographa californica nucleopolyhedrovirus.apr

|                                                     |                                |                                                                                                                                                |              |       |       |       |       |       |       |  |  |  |
|-----------------------------------------------------|--------------------------------|------------------------------------------------------------------------------------------------------------------------------------------------|--------------|-------|-------|-------|-------|-------|-------|--|--|--|
|                                                     |                                |                                                                                                                                                | Section 1107 |       |       |       |       |       |       |  |  |  |
| Autographa californica nucleopolyhedrovirus NC 0... | (85163)                        | 85163                                                                                                                                          | 85173        | 85184 | 85195 | 85206 | 85217 | 85228 | 85239 |  |  |  |
|                                                     | (85116)                        | CTTTGACGTAGAAATCGTACGGTAGTTATTAGTTGGCAGATCGTCGACAAGTGTGAT-CGACTTGAAAAAGTTTAC                                                                   |              |       |       |       |       |       |       |  |  |  |
|                                                     | SARS-CoV-2 NC_045512.2 (10009) | TC TT T AC - - - - C A A C C A C C - A C A A C C T C T A T C A C C T C A G C T G T - T T T G C A G A G T G T T T T A G A - A A A T G C A T T - |              |       |       |       |       |       |       |  |  |  |
|                                                     |                                |                                                                                                                                                | Section 1108 |       |       |       |       |       |       |  |  |  |
| Autographa californica nucleopolyhedrovirus NC 0... | (85240)                        | 85240                                                                                                                                          | 85250        | 85261 | 85272 | 85283 | 85294 | 85305 | 85316 |  |  |  |
|                                                     | (85192)                        | ATTTTTATCGCTCAAAATATTTAAATTACATTTTGGCGATTTGGGTATATTGTTGTGGATTCGATGATTGTGAATGT                                                                  |              |       |       |       |       |       |       |  |  |  |
|                                                     | SARS-CoV-2 NC_045512.2 (10078) | --CCCATCTGGTAAAGTTGAGGGTTGTATGG-TACAAGTAACCTGT--GG----TACAAC TAC A C - - - - T A A C G G T                                                     |              |       |       |       |       |       |       |  |  |  |
|                                                     |                                |                                                                                                                                                | Section 1109 |       |       |       |       |       |       |  |  |  |
| Autographa californica nucleopolyhedrovirus NC 0... | (85317)                        | 85317                                                                                                                                          | 85327        | 85338 | 85349 | 85360 | 85371 | 85382 | 85393 |  |  |  |
|                                                     | (85269)                        | CAAAAACAAATTTATTTTCAATGAAACGCTTTTTTAAATGTAAATCTACAATAGCGTTGTGTGAATTTTGAACTAAA                                                                  |              |       |       |       |       |       |       |  |  |  |
|                                                     | SARS-CoV-2 NC_045512.2 (10142) | CTTTGGCTTGATGACGTAGTTTACTGTCAAGA--CATGTGATCTGCACCTCT--GAAGACATGC-TTAAACCCTAAAT                                                                 |              |       |       |       |       |       |       |  |  |  |
|                                                     |                                |                                                                                                                                                | Section 1110 |       |       |       |       |       |       |  |  |  |
| Autographa californica nucleopolyhedrovirus NC 0... | (85394)                        | 85394                                                                                                                                          | 85404        | 85415 | 85426 | 85437 | 85448 | 85459 | 85470 |  |  |  |
|                                                     | (85346)                        | TCAGAGCGTTCTTCTTGAAAGGTGGAACTTCGCTGATAATGATATCAAAATAGCCTTCCAAATTCGACGTCCTCGCAT                                                                 |              |       |       |       |       |       |       |  |  |  |
|                                                     | SARS-CoV-2 NC_045512.2 (10214) | TATGAAG-----ATTTACTCATTCGTAAGTCTAATCATAATTTCTTGGTACAGGCTGGTAATGTTTCAC TCAGGGTT                                                                 |              |       |       |       |       |       |       |  |  |  |
|                                                     |                                |                                                                                                                                                | Section 1111 |       |       |       |       |       |       |  |  |  |
| Autographa californica nucleopolyhedrovirus NC 0... | (85471)                        | 85471                                                                                                                                          | 85481        | 85492 | 85503 | 85514 | 85525 | 85536 | 85547 |  |  |  |
|                                                     | (85423)                        | CGAGTGTGCTACATGATCTCTACTGCCATACGACACAAAGACTAAACGCACCATCTCGTGCAACTCTGCAAGC                                                                      |              |       |       |       |       |       |       |  |  |  |
|                                                     | SARS-CoV-2 NC_045512.2 (10286) | -----ATTGGACATCTCTATGC AAAAT TGTGTACTTAAAGCTTAAGGTTGATACAGCAATCCTAAGACA--TA                                                                    |              |       |       |       |       |       |       |  |  |  |
|                                                     |                                |                                                                                                                                                | Section 1112 |       |       |       |       |       |       |  |  |  |
| Autographa californica nucleopolyhedrovirus NC 0... | (85548)                        | 85548                                                                                                                                          | 85558        | 85569 | 85580 | 85591 | 85602 | 85613 | 85624 |  |  |  |
|                                                     | (85500)                        | TGTCATACACAAACGGATCTCGAATCTCAACTTGCTCCCTTCGTTATGAGAGTGTGTCCAAATCAAAACACGACC                                                                    |              |       |       |       |       |       |       |  |  |  |
|                                                     | SARS-CoV-2 NC_045512.2 (10353) | AGTATAAGTTTGTTTCGATTCACACCAGGACAGACTTTTTCAGTG-----TTAGCTTGTGTAC-AAATGGTTTCAC-CATC                                                              |              |       |       |       |       |       |       |  |  |  |
|                                                     |                                |                                                                                                                                                | Section 1113 |       |       |       |       |       |       |  |  |  |
| Autographa californica nucleopolyhedrovirus NC 0... | (85625)                        | 85625                                                                                                                                          | 85635        | 85646 | 85657 | 85668 | 85679 | 85690 | 85701 |  |  |  |
|                                                     | (85577)                        | ACGTGCGGAATCCACGTCAAAGATTCGCTTTTGAGAGAGACCACTTTGTAGTGTGGCAATAGAAACCATTTCTTT                                                                    |              |       |       |       |       |       |       |  |  |  |
|                                                     | SARS-CoV-2 NC_045512.2 (10423) | TG GTG TTT A C - - - C A A T G T G - - - - C T A T G A G - - - - G C C C A A T T T C A C T A T T A A G G G T C A T T C - - - - - - - - - - C - |              |       |       |       |       |       |       |  |  |  |

SARS-CoV-2 & Autographa californica nucleopolyhedrovirus.apr

|                                                     |         |                 |             |               |          |        |        |         |         |
|-----------------------------------------------------|---------|-----------------|-------------|---------------|----------|--------|--------|---------|---------|
|                                                     |         | Section 1114    |             |               |          |        |        |         |         |
| Autographa californica nucleopolyhedrovirus NC 0... | (85702) | 85702           | 85712       | 85723         | 85734    | 85745  | 85756  | 85767   | 85778   |
|                                                     | (85654) | AAGAAACGAATACAT | TG          | GC            | GTTT     | TGTTGC | T      | AAGCACG | CA      |
|                                                     | (10476) | ----TTAATGGTTCA | TG          | TG            | G        | TAG    | TGTTGC | T       | TTTA--A |
|                                                     |         | Section 1115    |             |               |          |        |        |         |         |
| Autographa californica nucleopolyhedrovirus NC 0... | (85779) | 85779           | 85789       | 85800         | 85811    | 85822  | 85833  | 85844   | 85855   |
|                                                     | (85731) | TAT             | TG          | TGCCT         | GAT      | T      | CG     | CGCA    | TG      |
|                                                     | (10543) | CCA             | T           | A--TG         | GA       | T      | TAC    | CAAC    | TG      |
|                                                     |         | Section 1116    |             |               |          |        |        |         |         |
| Autographa californica nucleopolyhedrovirus NC 0... | (85856) | 85856           | 85866       | 85877         | 85888    | 85899  | 85910  | 85921   | 85932   |
|                                                     | (85808) | ATCTTG          | CACAGCTGCGG | GT            | C        | GTTGC  | AA     | ATTGA   | AT      |
|                                                     | (10603) | ----AC          | CTTTTG      | ---TT         | GA       | CAGGCA | AA     | CAGC--  | ACA     |
|                                                     |         | Section 1117    |             |               |          |        |        |         |         |
| Autographa californica nucleopolyhedrovirus NC 0... | (85933) | 85933           | 85943       | 85954         | 85965    | 85976  | 85987  | 85998   | 86009   |
|                                                     | (85885) | T               | TTG         | AGGTCGGCG     | T        | A      | CT     | CGCT    | T       |
|                                                     | (10671) | C               | TTG         | GTTGTACGC     | T        | G      | CT     | GTTA    | T       |
|                                                     |         | Section 1118    |             |               |          |        |        |         |         |
| Autographa californica nucleopolyhedrovirus NC 0... | (86010) | 86010           | 86020       | 86031         | 86042    | 86053  | 86064  | 86075   | 86086   |
|                                                     | (85962) | T               | G           | CTTTGA        | A        | G      | C      | G       | A       |
|                                                     | (10742) | T               | TT          | --A--         | A        | C      | TT     | G       | T       |
|                                                     |         | Section 1119    |             |               |          |        |        |         |         |
| Autographa californica nucleopolyhedrovirus NC 0... | (86087) | 86087           | 86097       | 86108         | 86119    | 86130  | 86141  | 86152   | 86163   |
|                                                     | (86039) | TAAACAAAA       | CTA         | CTCTAACTAATAG | ATT      | T      | C      | T       | T       |
|                                                     | (10808) | CCTCTTTCTG      | C           | T             | CAA      | -----  | ACTGGA | ATT     | G       |
|                                                     |         | Section 1120    |             |               |          |        |        |         |         |
| Autographa californica nucleopolyhedrovirus NC 0... | (86164) | 86164           | 86174       | 86185         | 86196    | 86207  | 86218  | 86229   | 86240   |
|                                                     | (86116) | TTTTCGTC        | T           | A             | CCGGCCAT | C      | T      | G       | T       |
|                                                     | (10871) | CAAAATGG        | T           | A             | TGAATGGA | C      | G      | T       | AC      |



SARS-CoV-2 & Autographa californica nucleopolyhedrovirus.apr

|                                                     |         |                          |                   |                 |                  |              |                  |              |                   |
|-----------------------------------------------------|---------|--------------------------|-------------------|-----------------|------------------|--------------|------------------|--------------|-------------------|
|                                                     |         | Section 1121             |                   |                 |                  |              |                  |              |                   |
| Autographa californica nucleopolyhedrovirus NC 0... | (86241) | 86241                    | 86251             | 86262           | 86273            | 86284        | 86295            | 86306        | 86317             |
|                                                     | (86192) | AACAAATTGATGTCAGACAGAATA | TTTGGCAAAGCTGT    | CAACAACAAT      | AAACGATTTC       | AACTGTACAC   | TGAG             |              |                   |
|                                                     | (10943) | --GTTAGACATGCTCAGGT      | GTTAC             | TTT-----CCAAAGT | GCAGTGA          | AAAGAA       | CA----ATCAAGG    | GTACAC       | ACCA              |
|                                                     |         | Section 1122             |                   |                 |                  |              |                  |              |                   |
| Autographa californica nucleopolyhedrovirus NC 0... | (86318) | 86318                    | 86328             | 86339           | 86350            | 86361        | 86372            | 86383        | 86394             |
|                                                     | (86269) | CTGTACGAGTTTATCGAACGGAC  | GGAAGGCGTCGATTGCT | GTTGTCCGTGCCAG  | CTATTGC          | CAAGAGTCTAC  | TCAA             |              |                   |
|                                                     | (11008) | CTGGTTGTTACFCACAAATTTTGA | CTTCACTTTAGT      | -TTAGTCCAGA     | -GTACTCAAT       | -GGTCTTTGT   | TCTTTT           | TTT          |                   |
|                                                     |         | Section 1123             |                   |                 |                  |              |                  |              |                   |
| Autographa californica nucleopolyhedrovirus NC 0... | (86395) | 86395                    | 86405             | 86416           | 86427            | 86438        | 86449            | 86460        | 86471             |
|                                                     | (86346) | CACCAA                   | AAATTACGTGGAA     | AACTTAAAT       | TGCAACTGTTTGACAT | TAAGCGCG     | CCAAATTTAAAAAGGA | ACC          | TTTTG             |
|                                                     | (11082) | TGTATG                   | AAATGCTTTTT       | ACCTTTGCT       | ATGG-GTATTATTGCT | TA           | TGCTGCTTTTGCAA   | -----TGATG   | TTTGT             |
|                                                     |         | Section 1124             |                   |                 |                  |              |                  |              |                   |
| Autographa californica nucleopolyhedrovirus NC 0... | (86472) | 86472                    | 86482             | 86493           | 86504            | 86515        | 86526            | 86537        | 86548             |
|                                                     | (86423) | ACAACATTCTTTACAA         | AGTATTCCTTAAAT    | TTACAAAAGT      | TTGTTGT          | TGAAAAAA     | AGGAAAAC         | ATACCA       | AGCACTGGG         |
|                                                     | (11152) | CA----AACATAAGC          | ATGCATTTCTCTG     | TTTGTTTTTGT     | TTACCTTCTCTTGCC  | ACTGTAGCTT   | ATTTTT           | AATATG       | GTC               |
|                                                     |         | Section 1125             |                   |                 |                  |              |                  |              |                   |
| Autographa californica nucleopolyhedrovirus NC 0... | (86549) | 86549                    | 86559             | 86570           | 86581            | 86592        | 86603            | 86614        | 86625             |
|                                                     | (86500) | TGTACACGC                | AAAAAGAAAATCAA    | ACAGGCA         | ATATTGAAT        | GATAAGGTTATT | TATT             | TACAAAACAGTA | ATAAAAA           |
|                                                     | (11225) | TA--TATGC                | CTGCTAGTTGGGTGA   | TGCGTATTATGA    | CATGGTTGGATA     | TG---GTTGA   | TAC----          | T----AGTTTGT |                   |
|                                                     |         | Section 1126             |                   |                 |                  |              |                  |              |                   |
| Autographa californica nucleopolyhedrovirus NC 0... | (86626) | 86626                    | 86636             | 86647           | 86658            | 86669        | 86680            | 86691        | 86702             |
|                                                     | (86577) | TAAAC                    | TATTTGAGCTT       | AGCGGCTT        | AGTTTAAAAATCT    | TGCAGACAT    | GATT             | TGTAACAGTC   | GAAAGC            |
|                                                     | (11289) | CTGGT                    | TTTAA             | GCTAAA          | AGACTGTG         | -----TATG    | TATGCAT          | CAGCTGTA     | -----GTG--TTACTAA |
|                                                     |         | Section 1127             |                   |                 |                  |              |                  |              |                   |
| Autographa californica nucleopolyhedrovirus NC 0... | (86703) | 86703                    | 86713             | 86724           | 86735            | 86746        | 86757            | 86768        | 86779             |
|                                                     | (86654) | CAGGC                    | GACGA             | AAATCGCT        | TCGTTTCAT        | TCGCTACT     | GTCGGCTGTGT      | GGAATGT      | CTGGT             |
|                                                     | (11349) | TGACAG                   | GCAAG             | AACTGTG         | TATGATGA         | TGG-TGCTAG-- | GAGAGT-GTGGACA   | CTAT         | -----G---AATGTC   |

SARS-CoV-2 & Autographa californica nucleopolyhedrovirus.apr

|                                                     |         |              |                    |                 |               |                  |                    |             |                                         |
|-----------------------------------------------------|---------|--------------|--------------------|-----------------|---------------|------------------|--------------------|-------------|-----------------------------------------|
|                                                     |         | Section 1128 |                    |                 |               |                  |                    |             |                                         |
| Autographa californica nucleopolyhedrovirus NC 0... | (86780) | 86780        | 86790              | 86801           | 86812         | 86823            | 86834              | 86845       | 86856                                   |
|                                                     | (86731) | TA           | ACTTCGGCGACCTGTCGA | TGAACG          | CTCCTGGATCTCT | GTATGTGCGGGGTCTA | CCCGGG             | CGGC        | GTCTGTAACC                              |
| SARS-CoV-2 NC_045512.2                              | (11411) | AC           | ACTCGTTTATAA-AGTT- | TATTATGGT       | ----          | AATGCTTTAG-----  | ATCAAG             | CCATTT      | CCATGTGGGCTCTT                          |
|                                                     |         | Section 1129 |                    |                 |               |                  |                    |             |                                         |
| Autographa californica nucleopolyhedrovirus NC 0... | (86857) | 86857        | 86867              | 86878           | 86889         | 86900            | 86911              | 86922       | 86933                                   |
|                                                     | (86808) | CG           | AGCTTCTGC          | GCCTGCGTGT      | TCGAAC        | CATATGTG         | GTACCGGT           | TGAAGAAC    | GGCGACGGCGAC                            |
| SARS-CoV-2 NC_045512.2                              | (11474) | AT           | AA--TCTCT          | GTT-AC          | TCTTA         | AACTA            | CTCAGGTG           | TAG-----    | TAC-AACGTGTCATGTTTTTGCCAGAGGTATTGT      |
|                                                     |         | Section 1130 |                    |                 |               |                  |                    |             |                                         |
| Autographa californica nucleopolyhedrovirus NC 0... | (86934) | 86934        | 86944              | 86955           | 86966         | 86977            | 86988              | 86999       | 87010                                   |
|                                                     | (86885) | AA           | TTGTGTAATTTA       | TGTAGCTGTAATTTT | TACCTTATTA    | ATAATTTT         | TTACGCTTTGCATTGACG | ACTGAA      | CTCCCA                                  |
| SARS-CoV-2 NC_045512.2                              | (11542) | TT           | TTAT-G----         | TGTGTG          | GAGTATTGCC    | TA               | TTTCTTCATA         | -ACT        | TGGTAATACACTTCAG-TGTATAATGCTAGTT        |
|                                                     |         | Section 1131 |                    |                 |               |                  |                    |             |                                         |
| Autographa californica nucleopolyhedrovirus NC 0... | (87011) | 87011        | 87021              | 87032           | 87043         | 87054            | 87065              | 87076       | 87087                                   |
|                                                     | (86962) | AA           | TATATATGT          | TTAACTCGTC      | TTGGT         | CGTTGAA          | TTTTTG             | TTGCTGTGTTT | CCCTAATATTTTCCAT                        |
| SARS-CoV-2 NC_045512.2                              | (11612) | T            | ATTGTTT            | TAAGGCTAT       | TTTGT         | AC               | TTGTTA             | -CTTTG      | GCCTCTTTTGTTTACTCAACCG--CTACTTTAGACTGAC |
|                                                     |         | Section 1132 |                    |                 |               |                  |                    |             |                                         |
| Autographa californica nucleopolyhedrovirus NC 0... | (87088) | 87088        | 87098              | 87109           | 87120         | 87131            | 87142              | 87153       | 87164                                   |
|                                                     | (87039) | T            | TATTGTAATCC        | TCAATGTT        | TGAAC         | TGCAAT           | TTGGACAC           | GGCATAG     | TTTCCATAGTCGTGTAA                       |
| SARS-CoV-2 NC_045512.2                              | (11686) | T            | ---CTT             | -GGTG           | T--T          | ATGATTAC         | TAGTTT             | CTACACAG    | GAGTTT                                  |
|                                                     |         | Section 1133 |                    |                 |               |                  |                    |             |                                         |
| Autographa californica nucleopolyhedrovirus NC 0... | (87165) | 87165        | 87175              | 87186           | 87197         | 87208            | 87219              | 87230       | 87241                                   |
|                                                     | (87116) | TG           | CATTGT             | AATACATCC       | GACTGAG       | CGGGTAC          | GGATCT             | TATGTG      | TTTGA                                   |
| SARS-CoV-2 NC_045512.2                              | (11756) | --           | CCCAAG             | AATAGCATAG      | G---ATG       | --CC             | TTCAAAC-           | TCAACAT     | TTAAATTGTTGGGTGTTGGTGGCAAACTTTGTATC     |
|                                                     |         | Section 1134 |                    |                 |               |                  |                    |             |                                         |
| Autographa californica nucleopolyhedrovirus NC 0... | (87242) | 87242        | 87252              | 87263           | 87274         | 87285            | 87296              | 87307       | 87318                                   |
|                                                     | (87193) | AAA          | ACGGAATT           | TCGGTACCG       | CTGTTGATGTA   | TGTT             | CGGCTGCA           | ACATTGTATC  | TTTCGCCGCGCTC                           |
| SARS-CoV-2 NC_045512.2                              | (11825) | AAA          | GTAGCCAC           | T-GTACAGT       | CTAAAA-----   | TGTCAG           | -ATGTAAAGTGCACAT   | CAGTAG      | TCCTTACTCTCAGTTTTCG                     |

## SARS-CoV-2 &amp; Autographa californica nucleopolyhedrovirus.apr

|                                                     |         |              |          |               |        |              |            |         |          |           |            |          |                   |         |            |             |     |              |              |        |        |      |      |      |     |     |     |     |   |       |   |   |     |    |      |        |   |   |     |     |    |   |     |   |   |   |   |   |   |   |   |   |     |   |   |   |   |   |   |   |   |   |
|-----------------------------------------------------|---------|--------------|----------|---------------|--------|--------------|------------|---------|----------|-----------|------------|----------|-------------------|---------|------------|-------------|-----|--------------|--------------|--------|--------|------|------|------|-----|-----|-----|-----|---|-------|---|---|-----|----|------|--------|---|---|-----|-----|----|---|-----|---|---|---|---|---|---|---|---|---|-----|---|---|---|---|---|---|---|---|---|
|                                                     |         | Section 1135 |          |               |        |              |            |         |          |           |            |          |                   |         |            |             |     |              |              |        |        |      |      |      |     |     |     |     |   |       |   |   |     |    |      |        |   |   |     |     |    |   |     |   |   |   |   |   |   |   |   |   |     |   |   |   |   |   |   |   |   |   |
| Autographa californica nucleopolyhedrovirus NC 0... | (87319) | 87319        | 87329    | 87340         | 87351  | 87362        | 87373      | 87384   | 87395    |           |            |          |                   |         |            |             |     |              |              |        |        |      |      |      |     |     |     |     |   |       |   |   |     |    |      |        |   |   |     |     |    |   |     |   |   |   |   |   |   |   |   |   |     |   |   |   |   |   |   |   |   |   |
|                                                     | (87270) | AA           | TTCTTCA  | AGAGT         | GG     | TGCGT        | T          | TG      | TC       | GCGC      | T          | GTAAA    | GC                | CACGTTT | TGT        | AA          | C   | AGCACTATTTTC | GC           | CATA   | TCTC   | ATA  | AT   |      |     |     |     |     |   |       |   |   |     |    |      |        |   |   |     |     |    |   |     |   |   |   |   |   |   |   |   |   |     |   |   |   |   |   |   |   |   |   |
|                                                     | (11895) | AA           | CA-ACTC  | AGAGT         | AG     | AATCA        | T          | CA      | TC       | TAAA      | T          | TGTGG    | GC                | TCA--   | A          | TGT         | GT  | C            | CAGTTACACAAT | G      | ACAT   | TCTC | T    | AGC  |     |     |     |     |   |       |   |   |     |    |      |        |   |   |     |     |    |   |     |   |   |   |   |   |   |   |   |   |     |   |   |   |   |   |   |   |   |   |
|                                                     |         | Section 1136 |          |               |        |              |            |         |          |           |            |          |                   |         |            |             |     |              |              |        |        |      |      |      |     |     |     |     |   |       |   |   |     |    |      |        |   |   |     |     |    |   |     |   |   |   |   |   |   |   |   |   |     |   |   |   |   |   |   |   |   |   |
| Autographa californica nucleopolyhedrovirus NC 0... | (87396) | 87396        | 87406    | 87417         | 87428  | 87439        | 87450      | 87461   | 87472    |           |            |          |                   |         |            |             |     |              |              |        |        |      |      |      |     |     |     |     |   |       |   |   |     |    |      |        |   |   |     |     |    |   |     |   |   |   |   |   |   |   |   |   |     |   |   |   |   |   |   |   |   |   |
|                                                     | (87347) | CGG          | ACTGTTGA | A             | ACAGCG | TG           | C          | AAA     | C        | GACGACCGC | A          | T        | AATA              | T       | CGACGGT    | CG          | T   | CAAGTCGA     | T            | TG     | TGGT   | CG   | AAG  | GC   | CAT | T   |     |     |   |       |   |   |     |    |      |        |   |   |     |     |    |   |     |   |   |   |   |   |   |   |   |   |     |   |   |   |   |   |   |   |   |   |
|                                                     | (11968) | T            | -----    | AAAG          | A      | TACTAC       | TG         | A       | AG-      | C         | CTT-TGAAA  | AA       | A                 | TGGT    | T          | TCACTA      | C   | T            | T            | CTGTTT | T      | G    | C    | T    | TTC | C   | -   | AT  | G | CAGGG | T |   |     |    |      |        |   |   |     |     |    |   |     |   |   |   |   |   |   |   |   |   |     |   |   |   |   |   |   |   |   |   |
|                                                     |         | Section 1137 |          |               |        |              |            |         |          |           |            |          |                   |         |            |             |     |              |              |        |        |      |      |      |     |     |     |     |   |       |   |   |     |    |      |        |   |   |     |     |    |   |     |   |   |   |   |   |   |   |   |   |     |   |   |   |   |   |   |   |   |   |
| Autographa californica nucleopolyhedrovirus NC 0... | (87473) | 87473        | 87483    | 87494         | 87505  | 87516        | 87527      | 87538   | 87549    |           |            |          |                   |         |            |             |     |              |              |        |        |      |      |      |     |     |     |     |   |       |   |   |     |    |      |        |   |   |     |     |    |   |     |   |   |   |   |   |   |   |   |   |     |   |   |   |   |   |   |   |   |   |
|                                                     | (87424) | C            | CAAC     | AGA           | G      | AT           | CGCACGGCGT | C       | CAACA    | G         | CGTGTCGGTT | TG       | AACCTGCGTC        | ATTTGC  | GGT        | C           | TG  | C            | ACGTGT       | AG     | TCGT   | T    | CA   |      |     |     |     |     |   |       |   |   |     |    |      |        |   |   |     |     |    |   |     |   |   |   |   |   |   |   |   |   |     |   |   |   |   |   |   |   |   |   |
|                                                     | (12035) | G            | CTGT     | AGA           | C      | AT           | AAA---     | CAAG    | C        | TTTGT     | G          | AAGAA--- | A                 | TG      | CTGGA----- | CAACA       | GGG | C            | AA           | C      | CTTACA | AG   | CTAT | T    | --  |     |     |     |   |       |   |   |     |    |      |        |   |   |     |     |    |   |     |   |   |   |   |   |   |   |   |   |     |   |   |   |   |   |   |   |   |   |
|                                                     |         | Section 1138 |          |               |        |              |            |         |          |           |            |          |                   |         |            |             |     |              |              |        |        |      |      |      |     |     |     |     |   |       |   |   |     |    |      |        |   |   |     |     |    |   |     |   |   |   |   |   |   |   |   |   |     |   |   |   |   |   |   |   |   |   |
| Autographa californica nucleopolyhedrovirus NC 0... | (87550) | 87550        | 87560    | 87571         | 87582  | 87593        | 87604      | 87615   | 87626    |           |            |          |                   |         |            |             |     |              |              |        |        |      |      |      |     |     |     |     |   |       |   |   |     |    |      |        |   |   |     |     |    |   |     |   |   |   |   |   |   |   |   |   |     |   |   |   |   |   |   |   |   |   |
|                                                     | (87501) | A            | ACGT     | TGGTTTCGAGCAG | T      | TTGAACAA     | C          | GAATG   | AT       | A         | CTTT       | T        | CCGATCGCAGCAAAAAT | AT      | CA         | T           | GG  | T            | C            | ATGA   | C      | AC   | G    | T    | C   |     |     |     |   |       |   |   |     |    |      |        |   |   |     |     |    |   |     |   |   |   |   |   |   |   |   |   |     |   |   |   |   |   |   |   |   |   |
|                                                     | (12097) | A            | G        | C             | T      | CA-GAGTTTAGT | T          | CCCTT-- | C        | ATCAT     | AT         | G        | AGCT              | T       | T----      | TGCTACTGCTC | A   | AG           | A            | G      | C      | T    | T    | ATGA | G   | CAG | G   | C   | T |       |   |   |     |    |      |        |   |   |     |     |    |   |     |   |   |   |   |   |   |   |   |   |     |   |   |   |   |   |   |   |   |   |
|                                                     |         | Section 1139 |          |               |        |              |            |         |          |           |            |          |                   |         |            |             |     |              |              |        |        |      |      |      |     |     |     |     |   |       |   |   |     |    |      |        |   |   |     |     |    |   |     |   |   |   |   |   |   |   |   |   |     |   |   |   |   |   |   |   |   |   |
| Autographa californica nucleopolyhedrovirus NC 0... | (87627) | 87627        | 87637    | 87648         | 87659  | 87670        | 87681      | 87692   | 87703    |           |            |          |                   |         |            |             |     |              |              |        |        |      |      |      |     |     |     |     |   |       |   |   |     |    |      |        |   |   |     |     |    |   |     |   |   |   |   |   |   |   |   |   |     |   |   |   |   |   |   |   |   |   |
|                                                     | (87578) | G            | CTG      | AT            | TTT    | T            | G          | TAT     | T        | CTG       | T          | AGAACT   | G                 | T       | G          | CT          | G   | TT           | C            | AA     | CGAA   | T    | AGT  | G    | AT  | G   | G   | ATT | T | CTGT  | T | A | T   | C  |      |        |   |   |     |     |    |   |     |   |   |   |   |   |   |   |   |   |     |   |   |   |   |   |   |   |   |   |
|                                                     | (12167) | G            | T        | G             | C      | T            | A          | A       | T        | --GG      | T          | G        | -A                | T       | T          | CTGAAG      | T   | T            | G            | T      | C      | T    | T    | A    | A   | A   | AGT | T   | G | A     | A | G | A   | G  | ---- | T      | C | T | T   | --- | T  | G | --- | A | T | G | T | G | G | C | T | A | --- |   |   |   |   |   |   |   |   |   |
|                                                     |         | Section 1140 |          |               |        |              |            |         |          |           |            |          |                   |         |            |             |     |              |              |        |        |      |      |      |     |     |     |     |   |       |   |   |     |    |      |        |   |   |     |     |    |   |     |   |   |   |   |   |   |   |   |   |     |   |   |   |   |   |   |   |   |   |
| Autographa californica nucleopolyhedrovirus NC 0... | (87704) | 87704        | 87714    | 87725         | 87736  | 87747        | 87758      | 87769   | 87780    |           |            |          |                   |         |            |             |     |              |              |        |        |      |      |      |     |     |     |     |   |       |   |   |     |    |      |        |   |   |     |     |    |   |     |   |   |   |   |   |   |   |   |   |     |   |   |   |   |   |   |   |   |   |
|                                                     | (87655) | G            | G        | C             | G      | C            | A          | T       | G        | T         | T          | G        | C                 | G       | A          | A           | G   | G            | C            | T      | G      | C    | T    | G    | C   | G   | C   | T   | G | C     | G | C | A   | A  | A    | A      | T | T | A   | T   | T  | A | C   | G | G | A |   |   |   |   |   |   |     |   |   |   |   |   |   |   |   |   |
|                                                     | (12228) | -----        | AATCTG   | A             | A      | T            | T          | G       | ACCGT--- | GAT       | G          | C        | A                 | G       | C          | C           | A   | T            | G            | C      | A      | A    | C    | G    | T   | A   | A   | G   | T | T     | G | G | A   | -- | AA   | GATGGC | T | - | GAT | C   | AA | G | C   | T |   |   |   |   |   |   |   |   |     |   |   |   |   |   |   |   |   |   |
|                                                     |         | Section 1141 |          |               |        |              |            |         |          |           |            |          |                   |         |            |             |     |              |              |        |        |      |      |      |     |     |     |     |   |       |   |   |     |    |      |        |   |   |     |     |    |   |     |   |   |   |   |   |   |   |   |   |     |   |   |   |   |   |   |   |   |   |
| Autographa californica nucleopolyhedrovirus NC 0... | (87781) | 87781        | 87791    | 87802         | 87813  | 87824        | 87835      | 87846   | 87857    |           |            |          |                   |         |            |             |     |              |              |        |        |      |      |      |     |     |     |     |   |       |   |   |     |    |      |        |   |   |     |     |    |   |     |   |   |   |   |   |   |   |   |   |     |   |   |   |   |   |   |   |   |   |
|                                                     | (87732) | C            | G        | C             | G      | G            | C          | G       | T        | A         | G          | G        | C                 | T       | G          | C           | G   | C            | G            | A      | C      | G    | T    | C    | C   | G   | C   | G   | C | G     | T | A | C   | T  | G    | A      | G | A | C   | G   | C  | T | A   | T | G | G | C | A | G | C |   |   |     |   |   |   |   |   |   |   |   |   |
|                                                     | (12290) | A            | T        | G             | A      | C            | C          | A       | A        | T         | G          | T        | A                 | T       | A          | A           | A   | C            | A            | G      | G      | C    | T    | A    | G   | A   | T   | A   | A | G     | A | G | --- | G  | C    | A      | A | A | G   | T   | T  | A | C   | T | A | G | T | G | C | T | A | T | G   | C | A | G | A | C | A | A | T | G |

## SARS-CoV-2 &amp; Autographa californica nucleopolyhedrovirus.apr

|                                                     |         |                                                                                |       |       |       |       |       |       |       |
|-----------------------------------------------------|---------|--------------------------------------------------------------------------------|-------|-------|-------|-------|-------|-------|-------|
|                                                     |         | Section 1142                                                                   |       |       |       |       |       |       |       |
| Autographa californica nucleopolyhedrovirus NC 0... | (87858) | 87858                                                                          | 87868 | 87879 | 87890 | 87901 | 87912 | 87923 | 87934 |
|                                                     | (87809) | GTTGTTATTTAAAAATTGTGTTTTTCGATTTCGAGCCACGTGCATCATATAAAATTATCAACACGTCGTGTTCAACT  |       |       |       |       |       |       |       |
|                                                     | (12363) | TTTTCATCTATGCTTAG---AAAGTTGGATTAAATGATGCACTCACACA---CATTATCAACATGCAAGAGATGGTTG |       |       |       |       |       |       |       |
|                                                     |         | Section 1143                                                                   |       |       |       |       |       |       |       |
| Autographa californica nucleopolyhedrovirus NC 0... | (87935) | 87935                                                                          | 87945 | 87956 | 87967 | 87978 | 87989 | 88000 | 88011 |
|                                                     | (87886) | GCACGCTTTGATGTTTCGTGCGAGAGCAAGGAATAGCTGGGGCCATATCGCCAATTGCATAGGCTCGTCTATTTTT   |       |       |       |       |       |       |       |
|                                                     | (12433) | TGTTCCCTTTGAACATAATACCTCTTAA-CAACAGCAGCCAACTAATGGTT-----GTATACACAGACTATA-ACAC  |       |       |       |       |       |       |       |
|                                                     |         | Section 1144                                                                   |       |       |       |       |       |       |       |
| Autographa californica nucleopolyhedrovirus NC 0... | (88012) | 88012                                                                          | 88022 | 88033 | 88044 | 88055 | 88066 | 88077 | 88088 |
|                                                     | (87963) | AACCGCAATTGTGTTTATTTCCTAATACACGCGATAGCGCTCATCGTGACCGACGACGCACTTACTCTGTAACTA    |       |       |       |       |       |       |       |
|                                                     | (12502) | ATATAAATAACGTGTGATGGTACAACATTTACTTATGCAACAGCAT--TGTGGGAATCACAACAGTTGTAGATGC    |       |       |       |       |       |       |       |
|                                                     |         | Section 1145                                                                   |       |       |       |       |       |       |       |
| Autographa californica nucleopolyhedrovirus NC 0... | (88089) | 88089                                                                          | 88099 | 88110 | 88121 | 88132 | 88143 | 88154 | 88165 |
|                                                     | (88040) | TCACCTTGGATCGTGTGTCGTAAACGCTTCCCAAAGTCTAACACGTGTGACCGTTCGATTCTATTCAACTTAATT    |       |       |       |       |       |       |       |
|                                                     | (12577) | AGATAGTAAATGTGTTCAACTTAGTGAAATT--AGTATGGAC-AATTCACCTAAATTAGC--ATGGCCTCTTATTG   |       |       |       |       |       |       |       |
|                                                     |         | Section 1146                                                                   |       |       |       |       |       |       |       |
| Autographa californica nucleopolyhedrovirus NC 0... | (88166) | 88166                                                                          | 88176 | 88187 | 88198 | 88209 | 88220 | 88231 | 88242 |
|                                                     | (88117) | GTTGGACGCGTTGGCTTGCAATCGGTTCCAAAGACTGGCGCTCCGACAGATTGAGTAGACAAAATTTTTAACTTTC   |       |       |       |       |       |       |       |
|                                                     | (12648) | -TAACAAGCTTTAAGGGCATTCTGTCAAAATTACAGAAATAATGAGCTTAGT-CCTGTTGCATTACGACAGATGT    |       |       |       |       |       |       |       |
|                                                     |         | Section 1147                                                                   |       |       |       |       |       |       |       |
| Autographa californica nucleopolyhedrovirus NC 0... | (88243) | 88243                                                                          | 88253 | 88264 | 88275 | 88286 | 88297 | 88308 | 88319 |
|                                                     | (88194) | CGTCTTATTGGGCGTAATGTGTTGATTAAACAACGACGCAACCGTTTGAAGGCCGAGTGTGATGGTTTGCAACA     |       |       |       |       |       |       |       |
|                                                     | (12723) | CTTGTTGCTGCCGTACTACACAAAGCTTGTGACATGATGACA-----ATGCGTTAGCTTACTACA-----ACACAAC  |       |       |       |       |       |       |       |
|                                                     |         | Section 1148                                                                   |       |       |       |       |       |       |       |
| Autographa californica nucleopolyhedrovirus NC 0... | (88320) | 88320                                                                          | 88330 | 88341 | 88352 | 88363 | 88374 | 88385 | 88396 |
|                                                     | (88271) | TGTCGACGGCCCAATTGCGT-TTGCAGCAAGGTCCTTGCTGGCGGCCTGTTGCGGCGGTCTCTTCGTGCTTGCGA    |       |       |       |       |       |       |       |
|                                                     | (12790) | AAAGGAGGTAGGTTGTACTTGCACTGTTATCCGATTTACAGGA-----TTTGAAATGGGCTA-GATTCCCT        |       |       |       |       |       |       |       |

SARS-CoV-2 & Autographa californica nucleopolyhedrovirus.apr

|                                                     |         |                                                                                   |       |       |       |       |       |       |       |
|-----------------------------------------------------|---------|-----------------------------------------------------------------------------------|-------|-------|-------|-------|-------|-------|-------|
|                                                     |         | Section 1149                                                                      |       |       |       |       |       |       |       |
| Autographa californica nucleopolyhedrovirus NC 0... | (88397) | 88397                                                                             | 88407 | 88418 | 88429 | 88440 | 88451 | 88462 | 88473 |
|                                                     | (88347) | CATGTTGTCGTCAGTGTCATATTCGGTATCATTATTGGAAGCAATCATGGTTGAGTTCGATTAAGCAGAGATATTCG     |       |       |       |       |       |       |       |
|                                                     | (12857) | AAGAGTGATGGAACGTGT--ACTATCTATACAGAA---CTGGAACCACTTGTAGGTTTGTTACAGACACACCTTAAA     |       |       |       |       |       |       |       |
|                                                     |         | Section 1150                                                                      |       |       |       |       |       |       |       |
| Autographa californica nucleopolyhedrovirus NC 0... | (88474) | 88474                                                                             | 88484 | 88495 | 88506 | 88517 | 88528 | 88539 | 88550 |
|                                                     | (88474) | TTGTCCCAATTGCTACTTGGTAATGATGTGCCTTATAAATGTTTCGGGCACAAATCATTTCTGTCATTAGCAACGTTTACA |       |       |       |       |       |       |       |
|                                                     | (12929) | GG-TCCCTA-AAAGTGAAGTATTTATACTTTATTATA-----AAGGA----TTAAACAACC-----TAAATAGAGGT     |       |       |       |       |       |       |       |
|                                                     |         | Section 1151                                                                      |       |       |       |       |       |       |       |
| Autographa californica nucleopolyhedrovirus NC 0... | (88551) | 88551                                                                             | 88561 | 88572 | 88583 | 88594 | 88605 | 88616 | 88627 |
|                                                     | (88501) | AATATCTATTTTGATCAATTTCAATTTATGAATTAAACAGATTAAATGTTTTCGTCGAGTACTTGCTCATGATGAAAC    |       |       |       |       |       |       |       |
|                                                     | (12986) | ATGGTACTTGGTAGTTTAGCTGCCACAGTACGTCTACAAAGCTGG--TAATGCAAACAGAAAGTGCCTGCCAATTCAA--  |       |       |       |       |       |       |       |
|                                                     |         | Section 1152                                                                      |       |       |       |       |       |       |       |
| Autographa californica nucleopolyhedrovirus NC 0... | (88628) | 88628                                                                             | 88638 | 88649 | 88660 | 88671 | 88682 | 88693 | 88704 |
|                                                     | (88578) | GACAAACGTGTGCGGAGTTCCAACTCCGCTACCGGATACGCTTTGTTGGGCAAACTCTCTAATAATAGTGTCACAAATA   |       |       |       |       |       |       |       |
|                                                     | (13059) | -----CTGTATTATCTTTCGTGTGCTTTTGTGTAGATGCTGCTAAAGCTTACAAGATATATCTAGCTAGTGGGGAC      |       |       |       |       |       |       |       |
|                                                     |         | Section 1153                                                                      |       |       |       |       |       |       |       |
| Autographa californica nucleopolyhedrovirus NC 0... | (88705) | 88705                                                                             | 88715 | 88726 | 88737 | 88748 | 88759 | 88770 | 88781 |
|                                                     | (88655) | AAGCGCATCAATACGGTGG-ACGCTATTTTGTGTAAACCTTTTTCATTTTAGTATTGCGGCCCAATTTCTATCATGAAGT  |       |       |       |       |       |       |       |
|                                                     | (13131) | AACCAATCACTAATTGTGTTAAGATGTTGTGTACACACACTGGTA-CTGGTCAGGCAAT-AACAGTTACACCCGGAAG    |       |       |       |       |       |       |       |
|                                                     |         | Section 1154                                                                      |       |       |       |       |       |       |       |
| Autographa californica nucleopolyhedrovirus NC 0... | (88782) | 88782                                                                             | 88792 | 88803 | 88814 | 88825 | 88836 | 88847 | 88858 |
|                                                     | (88731) | TTTTTAACGGTAGCAACAGCCTGTCCTCGTTAGCAACAAGTGGAAGCAGCCGTGTCATTGCGCGCTCAAAATACTCAAAC  |       |       |       |       |       |       |       |
|                                                     | (13206) | CCAATATGG--ATC-AAGAATCC-TTGTGTGGTGCAATCAGTGTTGTCTGTACTGTCGTTGTCAC-ATAGATCATCAAA   |       |       |       |       |       |       |       |
|                                                     |         | Section 1155                                                                      |       |       |       |       |       |       |       |
| Autographa californica nucleopolyhedrovirus NC 0... | (88859) | 88859                                                                             | 88869 | 88880 | 88891 | 88902 | 88913 | 88924 | 88935 |
|                                                     | (88808) | ACCGGCTCGTGATCTTCTGTGCGCAATCCGACGGTTGCTTTTTTTGCATTCTTTGACAAATGGCAGCGACATGTTCGCG   |       |       |       |       |       |       |       |
|                                                     | (13278) | ATCGCTAAA---GGATTTTGTGACTTAAAAAGG---TAAGTATGTACAAATACCTA-----CAACTTGTGCTA         |       |       |       |       |       |       |       |

SARS-CoV-2 & Autographa californica nucleopolyhedrovirus.apr

|                                                     |                        |                    |              |                |         |          |             |         |               |          |             |         |         |      |       |        |      |          |       |        |        |      |    |       |    |     |      |    |    |     |    |    |    |   |
|-----------------------------------------------------|------------------------|--------------------|--------------|----------------|---------|----------|-------------|---------|---------------|----------|-------------|---------|---------|------|-------|--------|------|----------|-------|--------|--------|------|----|-------|----|-----|------|----|----|-----|----|----|----|---|
|                                                     |                        | Section 1156       |              |                |         |          |             |         |               |          |             |         |         |      |       |        |      |          |       |        |        |      |    |       |    |     |      |    |    |     |    |    |    |   |
| Autographa californica nucleopolyhedrovirus NC 0... | (88936)                | 88936              | 88946        | 88957          | 88968   | 88979    | 88990       | 89001   | 89012         |          |             |         |         |      |       |        |      |          |       |        |        |      |    |       |    |     |      |    |    |     |    |    |    |   |
|                                                     | (88885)                | TTCGTGTACAAAGAA    | TAC          | GCTTTGT        | TCGCAA  | -ATCAAGT | TATAGAAAAAT | TGCACA  | AAATAT----    | CTGCGTAA | TCAA        |         |         |      |       |        |      |          |       |        |        |      |    |       |    |     |      |    |    |     |    |    |    |   |
|                                                     | SARS-CoV-2 NC_045512.2 | (13338)            | ATGACCC      | TGTGGGTTT      | TAC     | ----     | ACTTAA      | AAACA-C | AGTCTGTACCGTC | TGCGGT   | ATGTGGAAAGG | TTATGGC | TGT     | A    |       |        |      |          |       |        |        |      |    |       |    |     |      |    |    |     |    |    |    |   |
|                                                     |                        | Section 1157       |              |                |         |          |             |         |               |          |             |         |         |      |       |        |      |          |       |        |        |      |    |       |    |     |      |    |    |     |    |    |    |   |
| Autographa californica nucleopolyhedrovirus NC 0... | (89013)                | 89013              | 89023        | 89034          | 89045   | 89056    | 89067       | 89078   | 89089         |          |             |         |         |      |       |        |      |          |       |        |        |      |    |       |    |     |      |    |    |     |    |    |    |   |
|                                                     | (88957)                | GTGTGTTTCGTTAATAAT | GTCAC        | TTTCGT         | TTTTTGT | AATCG    | GGTTCGA     | AGCAAC  | CAGTTAC       | AA       | CATCAGAG    | GC      | ATGCCG  | A    |       |        |      |          |       |        |        |      |    |       |    |     |      |    |    |     |    |    |    |   |
|                                                     | SARS-CoV-2 NC_045512.2 | (13410)            | GTGTG        | TG-ATCAACTCCGC | GAA     | C        | CAT         | TGCTT   | CAGTCA        | AGCTG    | --ATG       | CA      | CAAT    | C    | GT    | TTT    | AA   | ACGGGTTT | GC    | GGTGTA | A      |      |    |       |    |     |      |    |    |     |    |    |    |   |
|                                                     |                        | Section 1158       |              |                |         |          |             |         |               |          |             |         |         |      |       |        |      |          |       |        |        |      |    |       |    |     |      |    |    |     |    |    |    |   |
| Autographa californica nucleopolyhedrovirus NC 0... | (89090)                | 89090              | 89100        | 89111          | 89122   | 89133    | 89144       | 89155   | 89166         |          |             |         |         |      |       |        |      |          |       |        |        |      |    |       |    |     |      |    |    |     |    |    |    |   |
|                                                     | (89034)                | ACATGGGTCTTAA      | AA           | AATGT          | CCAA    | CATTTT   | TGCAAG      | CCCGCT  | TCGAG         | GGTG     | CTCAGCGAGG  | ACG     | C       | CAAG | GTA   | TTTG   |      |          |       |        |        |      |    |       |    |     |      |    |    |     |    |    |    |   |
|                                                     | SARS-CoV-2 NC_045512.2 | (13484)            | GTGCAG       | CCCGTCTT       | ACACC   | GTG      | CGGCA       | CAGGCA  | CT-AG         | T---     | ACTGAT      | GTCG    | -----   | T    | ATA   | CAGG   | GCT  | TTTG     |       |        |        |      |    |       |    |     |      |    |    |     |    |    |    |   |
|                                                     |                        | Section 1159       |              |                |         |          |             |         |               |          |             |         |         |      |       |        |      |          |       |        |        |      |    |       |    |     |      |    |    |     |    |    |    |   |
| Autographa californica nucleopolyhedrovirus NC 0... | (89167)                | 89167              | 89177        | 89188          | 89199   | 89210    | 89221       | 89232   | 89243         |          |             |         |         |      |       |        |      |          |       |        |        |      |    |       |    |     |      |    |    |     |    |    |    |   |
|                                                     | (89111)                | CATTTGCACTCA       | AA           | CA             | TTTGA   | ATTTT    | GTTTGC      | GGGC    | TTGC          | ACGACT   | GACAC       | ATGAT   | CGCATCC | AC   | GT    | CG     | CGG  |          |       |        |        |      |    |       |    |     |      |    |    |     |    |    |    |   |
|                                                     | SARS-CoV-2 NC_045512.2 | (13547)            | ACATCTACAATG | ATA            | AA      | -GT      | AGCT        | -----   | GGTTT         | TTGCTAA  | ATT         | CC      | T       | AAA  | AA    | C-T--- | A    | -ATT     | GTTT  | GTC    | GGCTTC |      |    |       |    |     |      |    |    |     |    |    |    |   |
|                                                     |                        | Section 1160       |              |                |         |          |             |         |               |          |             |         |         |      |       |        |      |          |       |        |        |      |    |       |    |     |      |    |    |     |    |    |    |   |
| Autographa californica nucleopolyhedrovirus NC 0... | (89244)                | 89244              | 89254        | 89265          | 89276   | 89287    | 89298       | 89309   | 89320         |          |             |         |         |      |       |        |      |          |       |        |        |      |    |       |    |     |      |    |    |     |    |    |    |   |
|                                                     | (89188)                | CGTCGGA            | ATTG         | TAA            | TATTTT  | TGCAAGT  | ATTGCA      | TAA     | TGGTC         | CT       | TAAAA       | TGGG    | GT      | ACCT | GTTT  | GAT    | AA   | ACTCG    | TC    | GCG    | CA     |      |    |       |    |     |      |    |    |     |    |    |    |   |
|                                                     | SARS-CoV-2 NC_045512.2 | (13609)            | CAAGAA       | AAGG           | ACGA    | AG-----  | ATGAC       | AA      | TTTA          | AATTGAT  | TCT         | TACTT   | TG      | AGT  | T-AAG | GAGAC  | AC   | ACTT     | -TC   | TCT    | TAAC   | T    |    |       |    |     |      |    |    |     |    |    |    |   |
|                                                     |                        | Section 1161       |              |                |         |          |             |         |               |          |             |         |         |      |       |        |      |          |       |        |        |      |    |       |    |     |      |    |    |     |    |    |    |   |
| Autographa californica nucleopolyhedrovirus NC 0... | (89321)                | 89321              | 89331        | 89342          | 89353   | 89364    | 89375       | 89386   | 89397         |          |             |         |         |      |       |        |      |          |       |        |        |      |    |       |    |     |      |    |    |     |    |    |    |   |
|                                                     | (89265)                | AAAA               | TATC         | GAA            | AAAA    | TGT      | TTT         | T       | TACAT         | TT       | GTG         | TAT     | G       | TTG  | TCTGT | GTTG   | -    | TTGGCT   | TG    | ATT    | CT     | AAAA | CT | ACTCT | TT | AT  |      |    |    |     |    |    |    |   |
|                                                     | SARS-CoV-2 NC_045512.2 | (13679)            | ACC          | A              | CAT     | GAA      | G           | AAA     | CAA           | TTT      | A           | TAA     | AT      | TT   | ACT   | TAAG   | -GAT | TG       | TCCAG | -C     | TG     | TTG  | C  | TAA   | CA | TG  | ACTT | CT | TT | TAA | G  | TT | A  |   |
|                                                     |                        | Section 1162       |              |                |         |          |             |         |               |          |             |         |         |      |       |        |      |          |       |        |        |      |    |       |    |     |      |    |    |     |    |    |    |   |
| Autographa californica nucleopolyhedrovirus NC 0... | (89398)                | 89398              | 89408        | 89419          | 89430   | 89441    | 89452       | 89463   | 89474         |          |             |         |         |      |       |        |      |          |       |        |        |      |    |       |    |     |      |    |    |     |    |    |    |   |
|                                                     | (89341)                | GGA                | AA           | CA             | ATACAT  | TTGTTA   | AA          | ATTC    | TGTG          | AAA      | -AA         | AGTA    | AGAC    | CTTT | ACTG  | TC     | CACG | AT       | CA    | AG     | CTT    | TGG  | TT | GA    | AA | TAT |      |    |    |     |    |    |    |   |
|                                                     | SARS-CoV-2 NC_045512.2 | (13754)            | GA           | AT             | AG      | A        | C-----      | GGT     | GAC           | ATG      | -G          | TACC    | A       | CAT  | A     | TAT    | C    | AGT      | -CA   | AC     | GT     | C    | T  | A     | AT | -AC | A    | CA | A  | TGG | CA | GA | CC | T |

SARS-CoV-2 & Autographa californica nucleopolyhedrovirus.apr

|                                                     |         |              |       |       |       |       |       |       |       |
|-----------------------------------------------------|---------|--------------|-------|-------|-------|-------|-------|-------|-------|
|                                                     |         | Section 1163 |       |       |       |       |       |       |       |
| Autographa californica nucleopolyhedrovirus NC 0... | (89475) | 89475        | 89485 | 89496 | 89507 | 89518 | 89529 | 89540 | 89551 |
|                                                     | (89417) | T            | T     | T     | G     | A     | A     | A     | A     |
| SARS-CoV-2 NC_045512.2                              | (13823) | T            | T     | T     | G     | A     | A     | A     | A     |
|                                                     |         | T            | T     | T     | G     | A     | A     | A     | A     |
|                                                     |         | Section 1164 |       |       |       |       |       |       |       |
| Autographa californica nucleopolyhedrovirus NC 0... | (89552) | 89552        | 89562 | 89573 | 89584 | 89595 | 89606 | 89617 | 89628 |
|                                                     | (89490) | G            | G     | T     | C     | G     | T     | A     | A     |
| SARS-CoV-2 NC_045512.2                              | (13899) | T            | G     | A     | T     | T     | G     | A     | T     |
|                                                     |         | T            | G     | A     | T     | T     | G     | A     | T     |
|                                                     |         | Section 1165 |       |       |       |       |       |       |       |
| Autographa californica nucleopolyhedrovirus NC 0... | (89629) | 89629        | 89639 | 89650 | 89661 | 89672 | 89683 | 89694 | 89705 |
|                                                     | (89567) | A            | A     | C     | G     | A     | T     | T     | C     |
| SARS-CoV-2 NC_045512.2                              | (13957) | -            | C     | G     | C     | G     | T     | A     | T     |
|                                                     |         | -            | C     | G     | C     | G     | T     | A     | T     |
|                                                     |         | Section 1166 |       |       |       |       |       |       |       |
| Autographa californica nucleopolyhedrovirus NC 0... | (89706) | 89706        | 89716 | 89727 | 89738 | 89749 | 89760 | 89771 | 89782 |
|                                                     | (89644) | T            | G     | T     | T     | G     | A     | T     | T     |
| SARS-CoV-2 NC_045512.2                              | (14023) | G            | C     | C     | A     | T     | G     | C     | T     |
|                                                     |         | G            | C     | C     | A     | T     | G     | C     | T     |
|                                                     |         | Section 1167 |       |       |       |       |       |       |       |
| Autographa californica nucleopolyhedrovirus NC 0... | (89783) | 89783        | 89793 | 89804 | 89815 | 89826 | 89837 | 89848 | 89859 |
|                                                     | (89718) | -            | C     | G     | C     | C     | G     | A     | T     |
| SARS-CoV-2 NC_045512.2                              | (14096) | T            | C     | G     | G     | T     | A     | T     | T     |
|                                                     |         | T            | C     | G     | G     | T     | A     | T     | T     |
|                                                     |         | Section 1168 |       |       |       |       |       |       |       |
| Autographa californica nucleopolyhedrovirus NC 0... | (89860) | 89860        | 89870 | 89881 | 89892 | 89903 | 89914 | 89925 | 89936 |
|                                                     | (89794) | C            | A     | A     | C     | G     | T     | T     | G     |
| SARS-CoV-2 NC_045512.2                              | (14171) | T            | A     | T     | T     | A     | T     | T     | T     |
|                                                     |         | T            | A     | T     | T     | A     | T     | T     | T     |
|                                                     |         | Section 1169 |       |       |       |       |       |       |       |
| Autographa californica nucleopolyhedrovirus NC 0... | (89937) | 89937        | 89947 | 89958 | 89969 | 89980 | 89991 | 90002 | 90013 |
|                                                     | (89871) | A            | G     | A     | C     | G     | A     | C     | C     |
| SARS-CoV-2 NC_045512.2                              | (14240) | A            | G     | A     | C     | G     | A     | C     | C     |
|                                                     |         | A            | G     | A     | C     | G     | A     | C     | C     |

SARS-CoV-2 & Autographa californica nucleopolyhedrovirus.apr

|                                                     |         |              |           |         |            |             |            |          |           |
|-----------------------------------------------------|---------|--------------|-----------|---------|------------|-------------|------------|----------|-----------|
|                                                     |         | Section 1170 |           |         |            |             |            |          |           |
| Autographa californica nucleopolyhedrovirus NC 0... | (90014) | 90014        | 90024     | 90035   | 90046      | 90057       | 90068      | 90079    | 90090     |
|                                                     | (89948) | CAGAACATTG   | AGGGTT    | ACGATA  | GTTTAT     | TAAAT       | TAAGGCGGA  | AGAGTGT  | TATGTTAA  |
| SARS-CoV-2 NC_045512.2                              | (14314) | CAGACATACC   | ACCC-AA   | ATTGTG  | GTTA       | CTGTT       | GGATGAC    | AGATG    | CACTTCT   |
|                                                     |         |              |           |         |            |             |            |          |           |
|                                                     |         | Section 1171 |           |         |            |             |            |          |           |
| Autographa californica nucleopolyhedrovirus NC 0... | (90091) | 90091        | 90101     | 90112   | 90123      | 90134       | 90145      | 90156    | 90167     |
|                                                     | (90025) | GAGCAT       | TAA       | AAAAA   | TCATGGA    | CGACA       | --CGGAA    | CGTT     | CGAAA     |
| SARS-CoV-2 NC_045512.2                              | (14388) | ATTCTC       | TACA      | -GTGT   | TCCCAC     | CTACA       | AGTTT      | TGGACCA  | CTAGT     |
|                                                     |         |              |           |         |            |             |            |          |           |
|                                                     |         | Section 1172 |           |         |            |             |            |          |           |
| Autographa californica nucleopolyhedrovirus NC 0... | (90168) | 90168        | 90178     | 90189   | 90200      | 90211       | 90222      | 90233    | 90244     |
|                                                     | (90100) | AAC          | TGCC      | --GCAA  | ACGCTCT    | TCTGGAGAGGC | GAGCGC     | AGACGTCC | CGACGAT   |
| SARS-CoV-2 NC_045512.2                              | (14458) | --TT         | TGTAGTTTC | AACTGGA | TACCACTTCA | -GAGAGC     | TAGGTGTT   | GTACATA  | ATCAG     |
|                                                     |         |              |           |         |            |             |            |          |           |
|                                                     |         | Section 1173 |           |         |            |             |            |          |           |
| Autographa californica nucleopolyhedrovirus NC 0... | (90245) | 90245        | 90255     | 90266   | 90277      | 90288       | 90299      | 90310    | 90321     |
|                                                     | (90175) | TAT          | TCCCACGGC | ATT     | TAGCGA     | TCCGC       | TCCAGGCCCC | AGC      | GCGC      |
| SARS-CoV-2 NC_045512.2                              | (14529) | CTC          | TAGACT    | --T     | AGT        | -TTTA       | AGGAAT     | TA--CT   | TGTGTAT   |
|                                                     |         |              |           |         |            |             |            |          |           |
|                                                     |         | Section 1174 |           |         |            |             |            |          |           |
| Autographa californica nucleopolyhedrovirus NC 0... | (90322) | 90322        | 90332     | 90343   | 90354      | 90365       | 90376      | 90387    | 90398     |
|                                                     | (90252) | CGT          | ACAT      | TGGAAAC | CGCCCGA    | --CGT       | ACCGC      | CGAACA   | TTACACC   |
| SARS-CoV-2 NC_045512.2                              | (14594) | GTA          | ATC       | TATT--A | CTAGAT     | AAA         | CGC        | ACTAC    | GTGCTT    |
|                                                     |         |              |           |         |            |             |            |          |           |
|                                                     |         | Section 1175 |           |         |            |             |            |          |           |
| Autographa californica nucleopolyhedrovirus NC 0... | (90399) | 90399        | 90409     | 90420   | 90431      | 90442       | 90453      | 90464    | 90475     |
|                                                     | (90327) | CGA          | CGAGTAC   | AA      | TTCCCTGGT  | CAAGACGG    | TTCTTT     | TGCGT    | TTAATC    |
| SARS-CoV-2 NC_045512.2                              | (14669) | TCA          | AACCCGGT  | AA      | -----      | TTT         | TAA        | CAAGAC   | TTCTAT    |
|                                                     |         |              |           |         |            |             |            |          |           |
|                                                     |         | Section 1176 |           |         |            |             |            |          |           |
| Autographa californica nucleopolyhedrovirus NC 0... | (90476) | 90476        | 90486     | 90497   | 90508      | 90519       | 90530      | 90541    | 90552     |
|                                                     | (90404) | TTGC         | ACATAACA  | ACTATTG | ATC        | AA          | TTGAAAA    | GT       | TAGAGATTA |
| SARS-CoV-2 NC_045512.2                              | (14725) | TTTAA        | -----     | GGA     | AGG        | AG          | TTCTGTT    | GAAT     | -----     |
|                                                     |         |              |           |         |            |             |            |          |           |



SARS-CoV-2 & Autographa californica nucleopolyhedrovirus.apr

|                                                     |         |                              |                            |                             |                         |                     |                 |          |       |
|-----------------------------------------------------|---------|------------------------------|----------------------------|-----------------------------|-------------------------|---------------------|-----------------|----------|-------|
|                                                     |         | Section 1177                 |                            |                             |                         |                     |                 |          |       |
| Autographa californica nucleopolyhedrovirus NC 0... | (90553) | 90553                        | 90563                      | 90574                       | 90585                   | 90596               | 90607           | 90618    | 90629 |
|                                                     | (90481) | AATATTTTAAACCA               | GGAAGATTGTGTGATAC          | TGAAAAATTGTCAAATTTAGCGTCAAA | GT                      | TTTCAACGTT          | CGTT            |          |       |
|                                                     | (14779) | AATGCTGCTATCAGC              | GATTA---TGACTACTA          | TCGTTATAATCTACCA            | ACAA-----TGTGTGATATCAGA | CAAC                |                 |          |       |
|                                                     |         | Section 1178                 |                            |                             |                         |                     |                 |          |       |
| Autographa californica nucleopolyhedrovirus NC 0... | (90630) | 90630                        | 90640                      | 90651                       | 90662                   | 90673               | 90684           | 90695    | 90706 |
|                                                     | (90558) | GCGTGGCCGACACGTTAG           | AGGTAA                     | TGTTGGAAG--CGCTTCGCAATAAT   | -ATTGAGTTGGTGCAGC       | CTGA                | AAGCGAT         |          |       |
|                                                     | (14846) | TACTATTTGTAGTT--GA           | AGTTGTGATTAAGTACTTTGAT     | TGTTACGATG-GTG              | GCTGTATTATATGCTAA       | ----CCA             |                 |          |       |
|                                                     |         | Section 1179                 |                            |                             |                         |                     |                 |          |       |
| Autographa californica nucleopolyhedrovirus NC 0... | (90707) | 90707                        | 90717                      | 90728                       | 90739                   | 90750               | 90761           | 90772    | 90783 |
|                                                     | (90632) | GCCGTACGGCGAATAGTCATAAAAAATG | ACGCAAGAAATTAAAGATT        | CGAGCACGCCGCTGTACAA         | CATTGCCATGTA            |                     |                 |          |       |
|                                                     | (14916) | AGTCA-T--CGTCA               | CAACCT-----AGACAAATCA      | G-----CTGGT-TTTC            | CATTTAATAAATGGG         | GTAAG--G            |                 |          |       |
|                                                     |         | Section 1180                 |                            |                             |                         |                     |                 |          |       |
| Autographa californica nucleopolyhedrovirus NC 0... | (90784) | 90784                        | 90794                      | 90805                       | 90816                   | 90827               | 90838           | 90849    | 90860 |
|                                                     | (90709) | CAAAAGCGATTATGACGCCAT        | AAAAA-CAAAAACATTAA         | ACCTTGTTGCACTTGTA           | CAACGACAGGC             | TGCCAATC            |                 |          |       |
|                                                     | (14975) | CTA--GACTTTATTATGATTC        | AAATGAGTTATGAGG-----       | ATCAAGATGCA-----            | CTTTTCGCATATACAAAC      |                     |                 |          |       |
|                                                     |         | Section 1181                 |                            |                             |                         |                     |                 |          |       |
| Autographa californica nucleopolyhedrovirus NC 0... | (90861) | 90861                        | 90871                      | 90882                       | 90893                   | 90904               | 90915           | 90926    | 90937 |
|                                                     | (90785) | AATTTCTTGGACACGTC            | CGCAACCA                   | GTCCAGTTCGCA                | AACTTCCGGCAAG           | AGATCTGCGGAAGAC     | GACTTGTTGC      |          |       |
|                                                     | (15038) | GTAA                         | TGT-----CATCCTACTATA-----  | ACTCAAA                     | TGAATC---TTAAGTATG      | CGCATTAGTGCAAGAATAG |                 |          |       |
|                                                     |         | Section 1182                 |                            |                             |                         |                     |                 |          |       |
| Autographa californica nucleopolyhedrovirus NC 0... | (90938) | 90938                        | 90948                      | 90959                       | 90970                   | 90981               | 90992           | 91003    | 91014 |
|                                                     | (90861) | CGACTCGCAGCAGCAAAC           | GTGCCAATAGAC               | CCGA                        | AATTAATGTAATATCGT       | CAG                 | AAGACGAGCAGGAAG | ATGATGAC |       |
|                                                     | (15099) | AGCTCGCACCGTAGCT-G           | GTGTCTC-TATCTGTAGTACT      | ATGACCAATAGACAG             | TTTCAT-----CA           | AAAAA-TT            |                 |          |       |
|                                                     |         | Section 1183                 |                            |                             |                         |                     |                 |          |       |
| Autographa californica nucleopolyhedrovirus NC 0... | (91015) | 91015                        | 91025                      | 91036                       | 91047                   | 91058               | 91069           | 91080    | 91091 |
|                                                     | (90938) | GTTGAAGATGTCGACTAC           | GAAAAAGAAAGTAA             | CGCAGAAATTAGAA              | GACGAAGATT              | TCTCAAA             | TTAAAAGCATT     |          |       |
|                                                     | (15165) | ATT-----GAAATCAATA           | GCCGCC-ACT--AGAG-GAGCTAC-- | TGTA-----GTAA               | TGGAAC                  | AAGCAAA             | TTCTAT          |          |       |

## SARS-CoV-2 &amp; Autographa californica nucleopolyhedrovirus.apr

|                                                     |         |                                                                                                               |       |       |       |       |       |       |       |
|-----------------------------------------------------|---------|---------------------------------------------------------------------------------------------------------------|-------|-------|-------|-------|-------|-------|-------|
|                                                     |         | Section 1184                                                                                                  |       |       |       |       |       |       |       |
| Autographa californica nucleopolyhedrovirus NC 0... | (91092) | 91092                                                                                                         | 91102 | 91113 | 91124 | 91135 | 91146 | 91157 | 91168 |
|                                                     | (91015) | A GAAT TTA GC -A AGG A CA TT GTC AAC GAAAAGCTTCAAAA AA TAT TGT GT C AC C GACGGTATGA AAC GG CTGTAC             |       |       |       |       |       |       |       |
|                                                     | (15226) | G GTGG TT GGC AC A AC ATG TT AAA AAC TGTT - - - - - T A T A GT GA TGT AG AA AAC CCTC -ACCTT A TG GG T - - - - |       |       |       |       |       |       |       |
|                                                     |         | Section 1185                                                                                                  |       |       |       |       |       |       |       |
| Autographa californica nucleopolyhedrovirus NC 0... | (91169) | 91169                                                                                                         | 91179 | 91190 | 91201 | 91212 | 91223 | 91234 | 91245 |
|                                                     | (91091) | GAATACT G C AACTG C AA AAAT TCTT TAGAG A CT TTA CCGAGCGCC GCT AACT AT GGCA GCT T GCT C AAAAGGC T AAA          |       |       |       |       |       |       |       |
|                                                     | (15289) | - - - - - TG GG ATTAT C CT AAAT GTGA TAGAG C AT GCG CTAACAT - - GCT TAGA AT TATG GC CT - CA C TTGTTCT T GCT   |       |       |       |       |       |       |       |
|                                                     |         | Section 1186                                                                                                  |       |       |       |       |       |       |       |
| Autographa californica nucleopolyhedrovirus NC 0... | (91246) | 91246                                                                                                         | 91256 | 91267 | 91278 | 91289 | 91300 | 91311 | 91322 |
|                                                     | (91168) | C CTGT ACA AT C TCGA TCA TAT C GAA A TGAA TG TAAATTTTTA C GAG T TGCT - - G TTT C C ATTGACACTGTACA AT GA       |       |       |       |       |       |       |       |
|                                                     | (15358) | C GCAA ACA TAC AACG TGT TGT - - - - A - - GCT TGTC - - - ACAC CGTT TCTA TAGA TTAG CTAATGAGTGTGCTC A AGT       |       |       |       |       |       |       |       |
|                                                     |         | Section 1187                                                                                                  |       |       |       |       |       |       |       |
| Autographa californica nucleopolyhedrovirus NC 0... | (91323) | 91323                                                                                                         | 91333 | 91344 | 91355 | 91366 | 91377 | 91388 | 91399 |
|                                                     | (91243) | CAATGAT TAA C AGT GA CAAAACGCTTTCTCA TCAA TTGGTAAAT TACAT ATTT TTTGG CC AGTAACTATTTT TCAAACT                  |       |       |       |       |       |       |       |
|                                                     | (15426) | ATTGAG TGA AATGT CA TGTGTGGCG - - - GT TCACTATATGT TAAACC AGG TGGAA CC TCATCAGGAGATGCC ACAA                   |       |       |       |       |       |       |       |
|                                                     |         | Section 1188                                                                                                  |       |       |       |       |       |       |       |
| Autographa californica nucleopolyhedrovirus NC 0... | (91400) | 91400                                                                                                         | 91410 | 91421 | 91432 | 91443 | 91454 | 91465 | 91476 |
|                                                     | (91320) | GC GCT AAAAA CT TCAAC TAT AT TGC GCGAA AACT TTTTAA CGT GTT TGG C CCGTTT AAACAAATCGA CTTT TATGG TCATG          |       |       |       |       |       |       |       |
|                                                     | (15500) | CT GCT TAT - G CT AAT AG TGT TT - TAACA ATT TGTCAA GCTG - - TCACG - - GCC AA TGTT - AATG CAC TTTTATCTAC       |       |       |       |       |       |       |       |
|                                                     |         | Section 1189                                                                                                  |       |       |       |       |       |       |       |
| Autographa californica nucleopolyhedrovirus NC 0... | (91477) | 91477                                                                                                         | 91487 | 91498 | 91509 | 91520 | 91531 | 91542 | 91553 |
|                                                     | (91397) | - TT TGT TTA TAAAA TTT AA CTT TTTAT TGC GA CATGCGT AATTTTGC CAAAT TAATC GACGAG CTGGTGCCCAACAAAC               |       |       |       |       |       |       |       |
|                                                     | (15570) | TGA TGG TAA C AAAA TTGC GAT AAG TAT GT CCGCAATTTACAACA CAGACTTTTAT GAGTGT CTCTATAGA AA TAGAG                  |       |       |       |       |       |       |       |
|                                                     |         | Section 1190                                                                                                  |       |       |       |       |       |       |       |
| Autographa californica nucleopolyhedrovirus NC 0... | (91554) | 91554                                                                                                         | 91564 | 91575 | 91586 | 91597 | 91608 | 91619 | 91630 |
|                                                     | (91473) | AGCCCA ACA TGAGAA TT CAC AGC GT GTT GGT - - - CAT GCGGGAT AAAATTGT TAACT AGCT TTTAG TAATTTACA                 |       |       |       |       |       |       |       |
|                                                     | (15647) | ATGTTG ACA CAGACT TT GTGA ATG AGTTT TACGCAT ATTTG CGTAAAC ATTTC TCAATGATGAT ACTCTCTGACGAT                     |       |       |       |       |       |       |       |

SARS-CoV-2 & Autographa californica nucleopolyhedrovirus.apr

|                                                     |                        |                                                                                    |                                                                                   |       |       |       |       |       |       |
|-----------------------------------------------------|------------------------|------------------------------------------------------------------------------------|-----------------------------------------------------------------------------------|-------|-------|-------|-------|-------|-------|
|                                                     |                        | Section 1191                                                                       |                                                                                   |       |       |       |       |       |       |
| Autographa californica nucleopolyhedrovirus NC 0... | (91631)                | 91631                                                                              | 91641                                                                             | 91652 | 91663 | 91674 | 91685 | 91696 | 91707 |
|                                                     | (91546)                | ATTTCAAACCTTTTCAAAGAAAGACAAAGTCGGCAACACAAACATTTGCAAAGACTAAATAATTGTTGATGAA--C--     |                                                                                   |       |       |       |       |       |       |
|                                                     | SARS-CoV-2 NC_045512.2 | (15724)                                                                            | GCTGTTGTGTGTTTTCAAATAGCACTTATGCATCTCAAAGGTCTAGTGGCTAGCAATAAGAA--CTTTAAGTCAGTTCTT  |       |       |       |       |       |       |
|                                                     |                        | Section 1192                                                                       |                                                                                   |       |       |       |       |       |       |
| Autographa californica nucleopolyhedrovirus NC 0... | (91708)                | 91708                                                                              | 91718                                                                             | 91729 | 91740 | 91751 | 91762 | 91773 | 91784 |
|                                                     | (91619)                | GCAAACCTACAAATGTTATATAAATAAAAAATTATAAAATATTTTAAATTTTATTATTTATATTTCAGTACATTTCACATAT |                                                                                   |       |       |       |       |       |       |
|                                                     | SARS-CoV-2 NC_045512.2 | (15799)                                                                            | TATTAA-TCAAACAATGTTTATATGTCGTGAAGCA-AA--ATGTTGGACTGAGACTGACCT--TACTAAAGGACCTCA    |       |       |       |       |       |       |
|                                                     |                        | Section 1193                                                                       |                                                                                   |       |       |       |       |       |       |
| Autographa californica nucleopolyhedrovirus NC 0... | (91785)                | 91785                                                                              | 91795                                                                             | 91806 | 91817 | 91828 | 91839 | 91850 | 91861 |
|                                                     | (91696)                | TAACATATTGTTTATACAAATTCCTTATAATCATTATGATTTAAATTGAATGTTGTCATAACAAATTAAACATTT        |                                                                                   |       |       |       |       |       |       |
|                                                     | SARS-CoV-2 NC_045512.2 | (15870)                                                                            | TGAATTTTGCCTCAACATACAAATGCTAGTTAAACAGGGTGATGATT-ATGTGTACCTT--CCTTACCCAGATCCAT     |       |       |       |       |       |       |
|                                                     |                        | Section 1194                                                                       |                                                                                   |       |       |       |       |       |       |
| Autographa californica nucleopolyhedrovirus NC 0... | (91862)                | 91862                                                                              | 91872                                                                             | 91883 | 91894 | 91905 | 91916 | 91927 | 91938 |
|                                                     | (91772)                | ATTAAACAAATACTTTTTCGTG-----TAATTTTTCAC-TTTGCACATGTTATAACAAAAAATTAATAATTTTTCATC     |                                                                                   |       |       |       |       |       |       |
|                                                     | SARS-CoV-2 NC_045512.2 | (15944)                                                                            | CAAGAAATCCATAGGGGCCGCTGTTTTGTAGATATGATATCGTAAAAACAGATGGTACACTTATGATTGAAACG-GTTTCG |       |       |       |       |       |       |
|                                                     |                        | Section 1195                                                                       |                                                                                   |       |       |       |       |       |       |
| Autographa californica nucleopolyhedrovirus NC 0... | (91939)                | 91939                                                                              | 91949                                                                             | 91960 | 91971 | 91982 | 91993 | 92004 | 92015 |
|                                                     | (91842)                | ATGTCGTGATTGTTCTATGGCGTCAAGTTGCTTTTAAATGTAATCGCAAGTTAAACACTCAAAGGACCTTTTCTAT       |                                                                                   |       |       |       |       |       |       |
|                                                     | SARS-CoV-2 NC_045512.2 | (16019)                                                                            | TGTCTTTAGCTATAGATGCTTACCACCTA-----CTAAAC-----A-TCTAATCAGGAGTATGCTGATGTC           |       |       |       |       |       |       |
|                                                     |                        | Section 1196                                                                       |                                                                                   |       |       |       |       |       |       |
| Autographa californica nucleopolyhedrovirus NC 0... | (92016)                | 92016                                                                              | 92026                                                                             | 92037 | 92048 | 92059 | 92070 | 92081 | 92092 |
|                                                     | (91919)                | TT-TTAATTGTTT--AAATCTTTTATAAATCAGACTTCAGTTTGTAAATTAGATTCCACATCGA--ATAATAAATCC      |                                                                                   |       |       |       |       |       |       |
|                                                     | SARS-CoV-2 NC_045512.2 | (16082)                                                                            | TTCAATTTGTACTTACAATACAATAAGAAGCTACATGATGAGTTAAACAGGACACATGTTAGAC--ATGTATTTCTGTTA  |       |       |       |       |       |       |
|                                                     |                        | Section 1197                                                                       |                                                                                   |       |       |       |       |       |       |
| Autographa californica nucleopolyhedrovirus NC 0... | (92093)                | 92093                                                                              | 92103                                                                             | 92114 | 92125 | 92136 | 92147 | 92158 | 92169 |
|                                                     | (91991)                | TTCCAGCGGGCTTTGGGAA--ACATTAAAGACTTGAAATTTAACCTTTCTACAAAAATCGTTGTACAAATA--TTTG      |                                                                                   |       |       |       |       |       |       |
|                                                     | SARS-CoV-2 NC_045512.2 | (16157)                                                                            | TGCTTACTAAT-----GATAACACTTCAGG-----TATTGGGAACCTGAGTTT                             |       |       |       |       |       |       |

## SARS-CoV-2 &amp; Autographa californica nucleopolyhedrovirus.apr

|                                                     |         |              |            |           |               |            |       |        |          |
|-----------------------------------------------------|---------|--------------|------------|-----------|---------------|------------|-------|--------|----------|
|                                                     |         | Section 1198 |            |           |               |            |       |        |          |
| Autographa californica nucleopolyhedrovirus NC 0... | (92170) | 92170        | 92180      | 92191     | 92202         | 92213      | 92224 | 92235  | 92246    |
|                                                     | (92064) | TGA          | CA         | CGGAA     | TAG           | TATTAAACCC | CA    | CGT    | TAGTCAAC |
|                                                     | (16203) | TGA          | GG         | CTATG     | TACACACCGCATA | CA         | GTC   | TACAGG | CTGT     |
|                                                     |         | Section 1199 |            |           |               |            |       |        |          |
| Autographa californica nucleopolyhedrovirus NC 0... | (92247) | 92247        | 92257      | 92268     | 92279         | 92290      | 92301 | 92312  | 92323    |
|                                                     | (92141) | T            | AAT        | TGAATT    | TC            | GTAAAGC    | GT    | AGTAT  | TTCAAAC  |
|                                                     | (16278) | A            | AGAT       | -----G    | GGT           | GCTT       | GC    | ATACG  | TAG---   |
|                                                     |         | Section 1200 |            |           |               |            |       |        |          |
| Autographa californica nucleopolyhedrovirus NC 0... | (92324) | 92324        | 92334      | 92345     | 92356         | 92367      | 92378 | 92389  | 92400    |
|                                                     | (92218) | TTGCG        | TCGTCTTTC  | CA        | ACCC          | ATT        | AAATT | CG     | CTAGACAA |
|                                                     | (16339) | ----         | A          | TATCAACAT | CA            | C---       | ATA   | AAATT  | AGTCT    |
|                                                     |         | Section 1201 |            |           |               |            |       |        |          |
| Autographa californica nucleopolyhedrovirus NC 0... | (92401) | 92401        | 92411      | 92422     | 92433         | 92444      | 92455 | 92466  | 92477    |
|                                                     | (92295) | C            | AGTTTCTAAA | TCT       | TT            | TC         | GAA   | TGC    | GG--     |
|                                                     | (16389) | TG           | CTCCAGGTTG | TGA       | TG            | TC         | AC    | AGAT   | GTGACTCA |
|                                                     |         | Section 1202 |            |           |               |            |       |        |          |
| Autographa californica nucleopolyhedrovirus NC 0... | (92478) | 92478        | 92488      | 92499     | 92510         | 92521      | 92532 | 92543  | 92554    |
|                                                     | (92370) | T            | ACGT       | AATTTTAT  | TTT           | G          | TTG   | CAAA   | TGA---   |
|                                                     | (16461) | TA           | --A        | ACCACCA   | TT            | AG         | TTT   | CC     | ATT--    |
|                                                     |         | Section 1203 |            |           |               |            |       |        |          |
| Autographa californica nucleopolyhedrovirus NC 0... | (92555) | 92555        | 92565      | 92576     | 92587         | 92598      | 92609 | 92620  | 92631    |
|                                                     | (92444) | G            | TCGGC      | CA        | ACGTACC       | TTTT       | T     | AC     | CTTGA    |
|                                                     | (16532) | GT           | --AG       | CG        | ATAA-TG       | TT         | AC    | TG     | AC-TT    |
|                                                     |         | Section 1204 |            |           |               |            |       |        |          |
| Autographa californica nucleopolyhedrovirus NC 0... | (92632) | 92632        | 92642      | 92653     | 92664         | 92675      | 92686 | 92697  | 92708    |
|                                                     | (92521) | C            | TT         | CG        | GGC           | ATT        | AC    | GG     | GTCCGC   |
|                                                     | (16598) | T            | TT         | TAG       | CT            | AAC        | AC    | CTG    | -TACT    |

SARS-CoV-2 & Autographa californica nucleopolyhedrovirus.apr

|                                                     |         |              |                    |         |                 |                   |                 |                     |                   |
|-----------------------------------------------------|---------|--------------|--------------------|---------|-----------------|-------------------|-----------------|---------------------|-------------------|
|                                                     |         | Section 1205 |                    |         |                 |                   |                 |                     |                   |
| Autographa californica nucleopolyhedrovirus NC 0... | (92709) | 92709        | 92719              | 92730   | 92741           | 92752             | 92763           | 92774               | 92785             |
|                                                     | (92598) | TCTGGCA      | ACGTGGTGC          | AGTCGT  | CCTGCAATTGTTGCT | TCAT              | GTTGAAA         | ATAT                | CGGTC             |
|                                                     | (16667) | CATTTAA      | ACGTGCTTT          | ATGGTAT | T-----GCTAC     | GTACG             | TACG--TG        | AAGT                | GTCTGTC           |
|                                                     |         | Section 1206 |                    |         |                 |                   |                 |                     |                   |
| Autographa californica nucleopolyhedrovirus NC 0... | (92786) | 92786        | 92796              | 92807   | 92818           | 92829             | 92840           | 92851               | 92862             |
|                                                     | (92675) | GCCGCGTT     | GCA                | TGAGTTT | ACGTAC          | AGTTTAA           | AGTT            | TGACATTCTTTAC       | AAATA             |
|                                                     | (16730) | TTTCATGG     | GAGTT              | GGTAA   | ACCTAGAC        | -----CA           | CCACTTA         | ACCGA-----AA        | TATGTC            |
|                                                     |         | Section 1207 |                    |         |                 |                   |                 |                     |                   |
| Autographa californica nucleopolyhedrovirus NC 0... | (92863) | 92863        | 92873              | 92884   | 92895           | 92906             | 92917           | 92928               | 92939             |
|                                                     | (92752) | TGTATCCTC    | CATTA              | TTTTT   | TGTTTTA         | AATCCAATACATT     | TAAAT           | TCGTTCACTACCAG      | TTGATT            |
|                                                     | (16797) | AACTAAAAA    | CAGTA              | AAGT    | TACAAAT         | AGGA--GA--G--TACA | ---CCT-----TTGA | AAAAGG              | TGAC-TAT          |
|                                                     |         | Section 1208 |                    |         |                 |                   |                 |                     |                   |
| Autographa californica nucleopolyhedrovirus NC 0... | (92940) | 92940        | 92950              | 92961   | 92972           | 92983             | 92994           | 93005               | 93016             |
|                                                     | (92729) | ATTTT        | TTATC              | TCAT    | CGCCACGTTGAA    | CAACA             | ATGTTT          | AAAAAT              | TTTGT             |
|                                                     | (16856) | ATGCT        | TGT                | TGTTTA  | CGAGGT---       | ACA-A             | CAAACT          | TACAAA              | TAAAT             |
|                                                     |         | Section 1209 |                    |         |                 |                   |                 |                     |                   |
| Autographa californica nucleopolyhedrovirus NC 0... | (93017) | 93017        | 93027              | 93038   | 93049           | 93060             | 93071           | 93082               | 93093             |
|                                                     | (92906) | ATATT        | CAACGTACACGTAATTGA | CATGAGC | TGCA            | ACAATC            | CTTTGGC         | ATTGTT              | CAAAA             |
|                                                     | (16927) | ACAGTAA      | TGC-----           | CA      | TTA--AG         | TGCA              | C-----CT        | ACACTA              | -GTGC             |
|                                                     |         | Section 1210 |                    |         |                 |                   |                 |                     |                   |
| Autographa californica nucleopolyhedrovirus NC 0... | (93094) | 93094        | 93104              | 93115   | 93126           | 93137             | 93148           | 93159               | 93170             |
|                                                     | (92983) | TATAAATAATTT | TCA                | CATCG   | ACAC            | CGTCA             | TCAA            | CTTGGTTACAAAC       | TCGT              |
|                                                     | (16983) | T-----       | AC                 | TGGC-T  | TAT             | ACC               | CAACAC          | TCAA                | TATCTCA--G--ATG-- |
|                                                     |         | Section 1211 |                    |         |                 |                   |                 |                     |                   |
| Autographa californica nucleopolyhedrovirus NC 0... | (93171) | 93171        | 93181              | 93192   | 93203           | 93214             | 93225           | 93236               | 93247             |
|                                                     | (93060) | TGTCTTTAAATC | TTTAC              | GT      | TACTGA          | ACAT              | CTTAA           | TTCTGGGAGATTTTCCAGT | CAAAA             |
|                                                     | (17041) | TATCAA-----  | AAGGTT             | GGT     | TATGCA          | --AA              | GTAT            | TCTAC               | ACTCC--AGGGACCAC  |

SARS-CoV-2 & Autographa californica nucleopolyhedrovirus.apr

|                                                     |                                |                                                                                                                                                             |       |       |       |       |       |       |       |  |
|-----------------------------------------------------|--------------------------------|-------------------------------------------------------------------------------------------------------------------------------------------------------------|-------|-------|-------|-------|-------|-------|-------|--|
|                                                     |                                | Section 1212                                                                                                                                                |       |       |       |       |       |       |       |  |
| Autographa californica nucleopolyhedrovirus NC 0... | (93248)                        | 93248                                                                                                                                                       | 93258 | 93269 | 93280 | 93291 | 93302 | 93313 | 93324 |  |
|                                                     | (93137)                        | G TACAAG TCAA C G T A T T T G A C A T C G - - - T T G C C C G A T T C A T C T T T T G C A T - - - G T C G A T T T T T C A A A A - - - G C T C T             |       |       |       |       |       |       |       |  |
|                                                     | SARS-CoV-2 NC_045512.2 (17107) | T T T G C T A T T G G C C T A G C T C T C T A C T A C C C T T C T G C T C G - C A T A G T G T A T A C A G C T T G C T C T C A T T G C C G C T G T T G A T G |       |       |       |       |       |       |       |  |
|                                                     |                                | Section 1213                                                                                                                                                |       |       |       |       |       |       |       |  |
| Autographa californica nucleopolyhedrovirus NC 0... | (93325)                        | 93325                                                                                                                                                       | 93335 | 93346 | 93357 | 93368 | 93379 | 93390 | 93401 |  |
|                                                     | (93204)                        | T T A T T G T C G A T A A A T T T T T C A A A G G T C T C T C G A T C A C A T T T A G T G T A A A A T A T G G T A G T C A G T G T C G C T G C T T T C G A C |       |       |       |       |       |       |       |  |
|                                                     | SARS-CoV-2 NC_045512.2 (17183) | C A C T A T G T G A G A A G G C A T T - A A A A T A T - - T T G C C T A T A G A T A A A T G T A G T A G A A T T A T A C C T G C A C G T G C T C G T G T A   |       |       |       |       |       |       |       |  |
|                                                     |                                | Section 1214                                                                                                                                                |       |       |       |       |       |       |       |  |
| Autographa californica nucleopolyhedrovirus NC 0... | (93402)                        | 93402                                                                                                                                                       | 93412 | 93423 | 93434 | 93445 | 93456 | 93467 | 93478 |  |
|                                                     | (93281)                        | C G C G T A T C C C T T G G C A T G G C T G C C C G T A T C A A T G C A A A T G T A C A C C A T G T T A G A A T G T G C T G C T T A C T G T G C C T G T A   |       |       |       |       |       |       |       |  |
|                                                     | SARS-CoV-2 NC_045512.2 (17257) | G A G T G T T T T G A T A A A T T C A A A G T G A A T T C A A C A T T A G - - A - A C A G T A T - - - G T C T T T T G T A C T G T A A - A T G C A T T G C   |       |       |       |       |       |       |       |  |
|                                                     |                                | Section 1215                                                                                                                                                |       |       |       |       |       |       |       |  |
| Autographa californica nucleopolyhedrovirus NC 0... | (93479)                        | 93479                                                                                                                                                       | 93489 | 93500 | 93511 | 93522 | 93533 | 93544 | 93555 |  |
|                                                     | (93358)                        | T C A A G C C T T A T A T A C C T C A A A A T A T T T C A C A T T T T T G C A T C A T C G T A A A A T A T A C A T G C A T A T A A T T G T G T A C A A A A   |       |       |       |       |       |       |       |  |
|                                                     | SARS-CoV-2 NC_045512.2 (17327) | C T G A G A C - - - G A C A G C A - - - G A T A T A G T T G T C T - T T G A T G A A - - - - - A T T C A A A T G C C A C A A A A T T A T G A T - - T T G     |       |       |       |       |       |       |       |  |
|                                                     |                                | Section 1216                                                                                                                                                |       |       |       |       |       |       |       |  |
| Autographa californica nucleopolyhedrovirus NC 0... | (93556)                        | 93556                                                                                                                                                       | 93566 | 93577 | 93588 | 93599 | 93610 | 93621 | 93632 |  |
|                                                     | (93435)                        | T A T G A C T C A T T A A T C G A T C G T G C G T T A C A A G T A G A A T T C T A C T G G T A A A G C A A G T T C G G T T G T G A G C C G T G T G C A A A   |       |       |       |       |       |       |       |  |
|                                                     | SARS-CoV-2 NC_045512.2 (17389) | A G T G T T G T C A A T G C C A G A T T A C G T G C T A A G C A C T A T G T G T A C A - T T G G C G A C - - C C T G C T C A A T T A C C T G C A C C A C G   |       |       |       |       |       |       |       |  |
|                                                     |                                | Section 1217                                                                                                                                                |       |       |       |       |       |       |       |  |
| Autographa californica nucleopolyhedrovirus NC 0... | (93633)                        | 93633                                                                                                                                                       | 93643 | 93654 | 93665 | 93676 | 93687 | 93698 | 93709 |  |
|                                                     | (93512)                        | A C A T G A C A T C A T A A C T A A T C A T G T T T A T A A T C A T G T G C A A A A T A T G A C A T C A T C C G A C G A T T G T G T T T T A C A A G T A G   |       |       |       |       |       |       |       |  |
|                                                     | SARS-CoV-2 NC_045512.2 (17463) | C - - - - A C A T T G C - - T A A C T A A G G C A C A C T A G A A C C A G A A T A T T T C A - A T T C - A G T G T G T A G - - A C T T A - - - - - T G       |       |       |       |       |       |       |       |  |
|                                                     |                                | Section 1218                                                                                                                                                |       |       |       |       |       |       |       |  |
| Autographa californica nucleopolyhedrovirus NC 0... | (93710)                        | 93710                                                                                                                                                       | 93720 | 93731 | 93742 | 93753 | 93764 | 93775 | 93786 |  |
|                                                     | (93589)                        | A A T T C T A C T C G T A A A G C G A G T T T A A A A A T T T T G T G A C G T C A A T G A A A C A A C G T G T A A T A T T T T T T A C A A T A T T T A A G   |       |       |       |       |       |       |       |  |
|                                                     | SARS-CoV-2 NC_045512.2 (17524) | - - - A A A A C T A T A G G T C C A G A C A T G T T C C T C G G A A C T T G T C G G C G T T G T - - C T G C T G A A A T T G T T G A C A C T G T G A - -     |       |       |       |       |       |       |       |  |

SARS-CoV-2 & Autographa californica nucleopolyhedrovirus.apr

|                                                     |         |                        |              |            |         |                    |                       |               |                        |
|-----------------------------------------------------|---------|------------------------|--------------|------------|---------|--------------------|-----------------------|---------------|------------------------|
|                                                     |         | Section 1219           |              |            |         |                    |                       |               |                        |
| Autographa californica nucleopolyhedrovirus NC 0... | (93787) | 93787                  | 93797        | 93808      | 93819   | 93830              | 93841                 | 93852         | 93863                  |
|                                                     | (93666) | TGAAACA                | TTATGACTTCCA | ATAAT--TTG | TGGA    | TGTGGATACGTTTG     | CAAGA                 | CAATTGATTA    | CAGATAAATGTAGT         |
| SARS-CoV-2 NC_045512.2                              | (17594) | -GTGC--T               | ----TTGGTTT  | ATGATAA    | TAA     | GCTTAAGCACATAAAG-A | CAAAT                 | CAGCTCAATG    | CTTTAAATGTTTT          |
|                                                     |         | Section 1220           |              |            |         |                    |                       |               |                        |
| Autographa californica nucleopolyhedrovirus NC 0... | (93864) | 93864                  | 93874        | 93885      | 93896   | 93907              | 93918                 | 93929         | 93940                  |
|                                                     | (93741) | GCTCTA-ATCAA           | AGTGCGGAT    | CTGTTGC    | CGG     | AAACATT            | TTAGAGATTGTAG         | AGA-----      | AGGCCAGAGACAAG         |
| SARS-CoV-2 NC_045512.2                              | (17663) | ATAAGGGTGT-T           | ATCA         | CGCAT      | GATGTT  | CATCTGCA           | ATTAAACAGGCCA---CAA   | TAGGCGTGGTAAG | AGATTTCCT              |
|                                                     |         | Section 1221           |              |            |         |                    |                       |               |                        |
| Autographa californica nucleopolyhedrovirus NC 0... | (93941) | 93941                  | 93951        | 93962      | 93973   | 93984              | 93995                 | 94006         | 94017                  |
|                                                     | (93809) | TATTTTGAGGGCCAACTCAAAA | AAACTAT      | TGAATAC    | ATTAAA  | AAATATTTT          | TACGAAAAA             | ATA           | TATGGACGATTTCGA        |
| SARS-CoV-2 NC_045512.2                              | (17736) | TA-----CACGT-----      | AAACC-       | TGCT       | TGGA    | AGAAA              | GCTGTC                | TTTATTTCA     | ACCTTATAATTCACAGAATGCT |
|                                                     |         | Section 1222           |              |            |         |                    |                       |               |                        |
| Autographa californica nucleopolyhedrovirus NC 0... | (94018) | 94018                  | 94028        | 94039      | 94050   | 94061              | 94072                 | 94083         | 94094                  |
|                                                     | (93886) | TAGATTAT               | AAAGATTTT    | AACA       | GACGCAT | CGTATTGATAGT       | TTTTAAATTCGCTTTAAACA  | AGAGCA        | CAATACTTTC             |
| SARS-CoV-2 NC_045512.2                              | (17797) | GTAGCCTC               | AAAGATTTT    | ----       | GGGACTA | CCAACTCAAACT       | GTTGATTTCATCACAGGGCTC | AGAATATG      | ACTAT-GTC              |
|                                                     |         | Section 1223           |              |            |         |                    |                       |               |                        |
| Autographa californica nucleopolyhedrovirus NC 0... | (94095) | 94095                  | 94105        | 94116      | 94127   | 94138              | 94149                 | 94160         | 94171                  |
|                                                     | (93963) | ATCGT                  | TACAAAG      | AGATCA     | TCGA    | GTG                | GCATTAAAC             | GTTTAAAC      | AAATTAACCCCGATT        |
| SARS-CoV-2 NC_045512.2                              | (17869) | ATAT                   | TCACTCA      | AACCAC     | TGA     | ACA                | GCTCACTCTT            | GTAATGTA      | AAAC-----GATTTAAT      |
|                                                     |         | Section 1224           |              |            |         |                    |                       |               |                        |
| Autographa californica nucleopolyhedrovirus NC 0... | (94172) | 94172                  | 94182        | 94193      | 94204   | 94215              | 94226                 | 94237         | 94248                  |
|                                                     | (94040) | TGCTTC                 | AGCA         | TTACAA     | TGAAT   | GTTT               | GAA                   | AAATCTAGA     | CAATCCAGTCA            |
| SARS-CoV-2 NC_045512.2                              | (17936) | -----G                 | AGCA         | AAAGT      | AGCAT   | TTT                | GCA                   | T-----A       | TGTCGTAGATAGAGACCTTT   |
|                                                     |         | Section 1225           |              |            |         |                    |                       |               |                        |
| Autographa californica nucleopolyhedrovirus NC 0... | (94249) | 94249                  | 94259        | 94270      | 94281   | 94292              | 94303                 | 94314         | 94325                  |
|                                                     | (94117) | TTG                    | CTAC         | AAAA       | TATTTA  | TCGA               | AGCGTTTGAATA          | CAGT          | TACACCA                |
| SARS-CoV-2 NC_045512.2                              | (18001) | AGT                    | CTTGA        | -AAT       | TCCACG  | T--AGG             | ---AATGTGG            | CAACTTT       | ACAGGTGA               |

SARS-CoV-2 & Autographa californica nucleopolyhedrovirus.apr

|                                                     |                                |                                                                                |       |       |       |       |       |       |       |
|-----------------------------------------------------|--------------------------------|--------------------------------------------------------------------------------|-------|-------|-------|-------|-------|-------|-------|
|                                                     |                                | Section 1226                                                                   |       |       |       |       |       |       |       |
| Autographa californica nucleopolyhedrovirus NC 0... | (94326)                        | 94326                                                                          | 94336 | 94347 | 94358 | 94369 | 94380 | 94391 | 94402 |
|                                                     | (94193)                        | -TGAATTTGATTTTATTAACCGGCATTGAAACCTTTGCCAGATGCAAGACCGCCATCGCTTTTGGCCAACGTGATG   |       |       |       |       |       |       |       |
|                                                     | SARS-CoV-2 NC_045512.2 (18069) | TGTAGT--AAGGTAATCACTGGTT-----ACATCCTACACAGGC-----AC-----CTACAACCTC---AG        |       |       |       |       |       |       |       |
|                                                     |                                | Section 1227                                                                   |       |       |       |       |       |       |       |
| Autographa californica nucleopolyhedrovirus NC 0... | (94403)                        | 94403                                                                          | 94413 | 94424 | 94435 | 94446 | 94457 | 94468 | 94479 |
|                                                     | (94769)                        | AACGAACGTAAAAAATAACAAACACCAACTCAACGGCAAAATGTTTGCCTACCAGCACCACTGGCAC-AAATTGC    |       |       |       |       |       |       |       |
|                                                     | SARS-CoV-2 NC_045512.2 (18123) | TGTTGACACTAAATTAACCT-----GAAGGTTTATGT-----GTTGACAT--ACCTGGCATACCTAAG           |       |       |       |       |       |       |       |
|                                                     |                                | Section 1228                                                                   |       |       |       |       |       |       |       |
| Autographa californica nucleopolyhedrovirus NC 0... | (94480)                        | 94480                                                                          | 94490 | 94501 | 94512 | 94523 | 94534 | 94545 | 94556 |
|                                                     | (94345)                        | GTAACCTTGAAAAAAGAAATCATTTATTCCTTTGTTTCTTTGTAATTATATTGTTGCATTCTATTTCTAATATC     |       |       |       |       |       |       |       |
|                                                     | SARS-CoV-2 NC_045512.2 (18181) | GACATGACCTATAGAAGACT-CACTCTATGATGGGTTTAAAAATGAATTA--TCAAGTTAATGGTTACCTA----    |       |       |       |       |       |       |       |
|                                                     |                                | Section 1229                                                                   |       |       |       |       |       |       |       |
| Autographa californica nucleopolyhedrovirus NC 0... | (94557)                        | 94557                                                                          | 94567 | 94578 | 94589 | 94600 | 94611 | 94622 | 94633 |
|                                                     | (94477)                        | ATAGTTTCTCTAAATAAGTAGTTTCATATTTT---TGTTTTTGTACAGTAATTGTTTCTTGGTTTAAACAAGATCACA |       |       |       |       |       |       |       |
|                                                     | SARS-CoV-2 NC_045512.2 (18251) | A---CAT---GT-TATCACCCGCGAAGAAGCTATAAGACATGTACGTGCATGGATTGGCTTCGATGTCGAG--GGG   |       |       |       |       |       |       |       |
|                                                     |                                | Section 1230                                                                   |       |       |       |       |       |       |       |
| Autographa californica nucleopolyhedrovirus NC 0... | (94634)                        | 94634                                                                          | 94644 | 94655 | 94666 | 94677 | 94688 | 94699 | 94710 |
|                                                     | (94495)                        | ACCAATAACATAAAGAATAACACAATCATAACAAAAATTAAAAAGCCGCATACTACTAGAACAAATTCCTTTAATTAG |       |       |       |       |       |       |       |
|                                                     | SARS-CoV-2 NC_045512.2 (18319) | TGTCATGCTACTAGAGAGCTGTTGGTACCAATTT-----ACCTTTACAGCTAGGTTTTCCT--ACAGG-          |       |       |       |       |       |       |       |
|                                                     |                                | Section 1231                                                                   |       |       |       |       |       |       |       |
| Autographa californica nucleopolyhedrovirus NC 0... | (94711)                        | 94711                                                                          | 94721 | 94732 | 94743 | 94754 | 94765 | 94776 | 94787 |
|                                                     | (94572)                        | CGATCGGTTTCTATTACAAATTTGGCGAGCTGATCGCCTTCAGTGGCGAGTTGTGGGCTTGATGATGTCGACGA     |       |       |       |       |       |       |       |
|                                                     | SARS-CoV-2 NC_045512.2 (18381) | TGTTAACC---TAGTTGCTGT--ACCTACAGGTTATGTTGAT-ACACCTAATAATA---CAGATTTTTCAGAGT     |       |       |       |       |       |       |       |
|                                                     |                                | Section 1232                                                                   |       |       |       |       |       |       |       |
| Autographa californica nucleopolyhedrovirus NC 0... | (94788)                        | 94788                                                                          | 94798 | 94809 | 94820 | 94831 | 94842 | 94853 | 94864 |
|                                                     | (94649)                        | TATTGTTGCGGCGCGACCGCCTGTCGCTCTCGATATAATGTGGGCGCGCTCGGTTCATGATGTGCTTAACTACA     |       |       |       |       |       |       |       |
|                                                     | SARS-CoV-2 NC_045512.2 (18447) | TAG---TGTAAACCAACCGCCTGGAGATCA-----ATTTAAACACCTCA----TACCACTTAT-----GTACAA     |       |       |       |       |       |       |       |



SARS-CoV-2 & Autographa californica nucleopolyhedrovirus.apr

|                                                     |                        |                    |                                                                                      |                       |                       |                       |                       |                       |                       |                       |              |
|-----------------------------------------------------|------------------------|--------------------|--------------------------------------------------------------------------------------|-----------------------|-----------------------|-----------------------|-----------------------|-----------------------|-----------------------|-----------------------|--------------|
|                                                     |                        | (94865)            | <a href="#">94865</a>                                                                | <a href="#">94875</a> | <a href="#">94886</a> | <a href="#">94897</a> | <a href="#">94908</a> | <a href="#">94919</a> | <a href="#">94930</a> | <a href="#">94941</a> | Section 1233 |
| Autographa californica nucleopolvhedrovirus NC 0... | SARS-CoV-2 NC_045512.2 | (94726)<br>(18504) | AATAAAGTGTGACTTGACGGCGTCACCGTAGTCCGCTGCTGCTAAACCCTCCGTCCGTTAAGACGC GTTGC GTTACA      |                       |                       |                       |                       |                       |                       |                       |              |
|                                                     |                        |                    | AGGACTTCC TTGGAA TGTAGT GCGTATAA--- AGATTGTAC---- AAATGTTAAGT GACACAC----- TTAA----  |                       |                       |                       |                       |                       |                       |                       |              |
|                                                     |                        | (94942)            | <a href="#">94942</a>                                                                | <a href="#">94952</a> | <a href="#">94963</a> | <a href="#">94974</a> | <a href="#">94985</a> | <a href="#">94996</a> | <a href="#">95007</a> | <a href="#">95018</a> | Section 1234 |
| Autographa californica nucleopolvhedrovirus NC 0... | SARS-CoV-2 NC_045512.2 | (94803)<br>(18564) | AAATT AATGTTGTCCGATTAG CGTAGTCGAATAATCAAACGTGTTTGGCGGACTAAAAATCCGGCATGT-TGTATGG      |                       |                       |                       |                       |                       |                       |                       |              |
|                                                     |                        |                    | ----A AATCTCTCTGACAGAGT CGTATTGTGT----- CTATGTG----- G-CACATGGCTTTGA-GTTGACATC-TAT   |                       |                       |                       |                       |                       |                       |                       |              |
|                                                     |                        | (95019)            | <a href="#">95019</a>                                                                | <a href="#">95029</a> | <a href="#">95040</a> | <a href="#">95051</a> | <a href="#">95062</a> | <a href="#">95073</a> | <a href="#">95084</a> | <a href="#">95095</a> | Section 1235 |
| Autographa californica nucleopolvhedrovirus NC 0... | SARS-CoV-2 NC_045512.2 | (94879)<br>(18624) | GCA CAATGCCGTGGAAGCTGA TAGCAATGCTG--TCGTTCTTGCAAACAGCCGAATTTTTTTTGTAGG GCTCTGCTT     |                       |                       |                       |                       |                       |                       |                       |              |
|                                                     |                        |                    | G AAGTATTTTGTGAAA A---- TAGGAC--CTGAGCGCACCTGTTGTCTATGTGATAGACGTGCCACAT GCTTT-TCC    |                       |                       |                       |                       |                       |                       |                       |              |
|                                                     |                        | (95096)            | <a href="#">95096</a>                                                                | <a href="#">95106</a> | <a href="#">95117</a> | <a href="#">95128</a> | <a href="#">95139</a> | <a href="#">95150</a> | <a href="#">95161</a> | <a href="#">95172</a> | Section 1236 |
| Autographa californica nucleopolvhedrovirus NC 0... | SARS-CoV-2 NC_045512.2 | (94954)<br>(18694) | TATTCGGCGCAGACGACAC CATCTGGTCAAA GTTGTTC AATTTTATGATTACGT TGGGTACC AATTGATAGGGGAA A  |                       |                       |                       |                       |                       |                       |                       |              |
|                                                     |                        |                    | ACTGGTTTCAGACAC TTATGOC----- TGTTG GC-AT-CATTCTATTGATT TTTGATTACGTCTATAATCCGTTTATGA  |                       |                       |                       |                       |                       |                       |                       |              |
|                                                     |                        | (95173)            | <a href="#">95173</a>                                                                | <a href="#">95183</a> | <a href="#">95194</a> | <a href="#">95205</a> | <a href="#">95216</a> | <a href="#">95227</a> | <a href="#">95238</a> | <a href="#">95249</a> | Section 1237 |
| Autographa californica nucleopolvhedrovirus NC 0... | SARS-CoV-2 NC_045512.2 | (95031)<br>(18764) | ATTATTTTC TGGAA CATT TTGACAAAGTCCACAA CCGTTTGGCTATAGT CGGGAATGCCGAGCAAAG ACTGCGCCTG  |                       |                       |                       |                       |                       |                       |                       |              |
|                                                     |                        |                    | TTGATG TTC AACAA TGGGG TTTTACAGG--TA ACCTA----CAAAGCAACCATG ATCTGT ATTGTCAAGTTCATGGT |                       |                       |                       |                       |                       |                       |                       |              |
|                                                     |                        | (95250)            | <a href="#">95250</a>                                                                | <a href="#">95260</a> | <a href="#">95271</a> | <a href="#">95282</a> | <a href="#">95293</a> | <a href="#">95304</a> | <a href="#">95315</a> | <a href="#">95326</a> | Section 1238 |
| Autographa californica nucleopolvhedrovirus NC 0... | SARS-CoV-2 NC_045512.2 | (95108)<br>(18835) | TTTAATGTAATT TGAGA CTGGAGCG GTTACTGTAGCGCAATTGGATGGCACGTCGCCCTTCA TAAGCCG GCGCGTTC   |                       |                       |                       |                       |                       |                       |                       |              |
|                                                     |                        |                    | AATG---CA CATGTAGCTAGTTGTGATGCAATCATGACTAGG--TGTCTA-GCTGTCCACGAGTGCTTTTGTTAAGCG      |                       |                       |                       |                       |                       |                       |                       |              |
|                                                     |                        | (95327)            | <a href="#">95327</a>                                                                | <a href="#">95337</a> | <a href="#">95348</a> | <a href="#">95359</a> | <a href="#">95370</a> | <a href="#">95381</a> | <a href="#">95392</a> | <a href="#">95403</a> | Section 1239 |
| Autographa californica nucleopolvhedrovirus NC 0... | SARS-CoV-2 NC_045512.2 | (95185)<br>(18906) | TCTCCCAATTCAAT TTGTTGTA CAAATATCAATCTCCTCGTGC GGCGAGAT TGATTACATAGCGCGGGGCTGTTTTG    |                       |                       |                       |                       |                       |                       |                       |              |
|                                                     |                        |                    | TGTTGACTGGACTATTG AATATCTATAATTGGTGATGAAC TG AAGATT AATGCGGCT-TGTAGAAAGG-TTCAACA     |                       |                       |                       |                       |                       |                       |                       |              |

SARS-CoV-2 & Autographa californica nucleopolyhedrovirus.apr

|                                                     |         |              |         |                 |                  |             |                 |           |              |              |            |               |          |         |      |       |           |           |      |       |
|-----------------------------------------------------|---------|--------------|---------|-----------------|------------------|-------------|-----------------|-----------|--------------|--------------|------------|---------------|----------|---------|------|-------|-----------|-----------|------|-------|
|                                                     |         | Section 1240 |         |                 |                  |             |                 |           |              |              |            |               |          |         |      |       |           |           |      |       |
| Autographa californica nucleopolyhedrovirus NC 0... | (95404) | 95404        | 95414   | 95425           | 95436            | 95447       | 95458           | 95469     | 95480        |              |            |               |          |         |      |       |           |           |      |       |
|                                                     | (95262) | CGATA        | TTGAA   | AGATGCAA        | AAAATGC          | TTTCA       | ACGACAATATCTTCA | -----CCAT | TGGTGGACGT   | -TTC         | CAGATTTGAA |               |          |         |      |       |           |           |      |       |
|                                                     | (18981) | CATGG        | TTGTT   | AAAGCTGC        | ATTATTAG         | CAGAC       | AAATTCCCAGT     | TCTTCACGA | CAT          | TGGTAACT     | TAAAGCTATT | AAGT          |          |         |      |       |           |           |      |       |
|                                                     |         | Section 1241 |         |                 |                  |             |                 |           |              |              |            |               |          |         |      |       |           |           |      |       |
| Autographa californica nucleopolyhedrovirus NC 0... | (95481) | 95481        | 95491   | 95502           | 95513            | 95524       | 95535           | 95546     | 95557        |              |            |               |          |         |      |       |           |           |      |       |
|                                                     | (95333) | ACA          | TAA     | CAAA            | AAGTCAT          | TGCTTTCCACC | AATTCTTTAA      | AAATGAGAC | AGCG         | GGAATTTTCACA | AGCG       | ATCGGTTCGAAAT |          |         |      |       |           |           |      |       |
|                                                     | (19058) | GTG          | TA      | -CCTC           | AAGCTGA          | TGTAGAATGGA | AGTTCTAT        | GATGCACAG | CCTTG        | --T-----     | AGTGA      | CAAAGC-----   |          |         |      |       |           |           |      |       |
|                                                     |         | Section 1242 |         |                 |                  |             |                 |           |              |              |            |               |          |         |      |       |           |           |      |       |
| Autographa californica nucleopolyhedrovirus NC 0... | (95558) | 95558        | 95568   | 95579           | 95590            | 95601       | 95612           | 95623     | 95634        |              |            |               |          |         |      |       |           |           |      |       |
|                                                     | (95410) | TGC          | TTTT    | TTATT           | TGGAGGCGGAACGCT  | TTGACCG     | TTGC            | GTTTTTTTA | -GTAACGCGC   | TG           | CACGCA     | -GAT          | TG       | CATGT   | CCG  |       |           |           |      |       |
|                                                     | (19119) | ---          | TTATA   | AA              | AATAGAAGAATTATTC | TA--TTC     | TTATG           | CCACACA   | -TTCTGACAAAT | TT           | CACAG      | ATG           | -G       | TG      | ATG  | CCTA  |           |           |      |       |
|                                                     |         | Section 1243 |         |                 |                  |             |                 |           |              |              |            |               |          |         |      |       |           |           |      |       |
| Autographa californica nucleopolyhedrovirus NC 0... | (95635) | 95635        | 95645   | 95656           | 95667            | 95678       | 95689           | 95700     | 95711        |              |            |               |          |         |      |       |           |           |      |       |
|                                                     | (95485) | FTT          | CGGG    | GATACGTAAACTCGA | TGGG             | ACAT        | TTGGGG          | TTTT      | TCATG        | TGAACGA      | TCA        | -TAGTGT       | -----    | TG      | CAAT | TAAAC |           |           |      |       |
|                                                     | (19189) | TTT          | TG      | -----           | GAAT             | TG          | CAATG           | TCGATAG   | ATATC        | CTGCTAA      | ---TTC     | CAT           | TGTT     | TGTAGAT | TT   | ---   | TG        | AC        | AC   |       |
|                                                     |         | Section 1244 |         |                 |                  |             |                 |           |              |              |            |               |          |         |      |       |           |           |      |       |
| Autographa californica nucleopolyhedrovirus NC 0... | (95712) | 95712        | 95722   | 95733           | 95744            | 95755       | 95766           | 95777     | 95788        |              |            |               |          |         |      |       |           |           |      |       |
|                                                     | (95556) | AA           | GTTGTTG | GTCAG           | GAGCA            | ----        | CGCT            | AAAAA     | CAC          | GCGTT        | TCGCCC     | G             | CAC      | CGA     | TTT  | CGG   | TG        | ATGGGTACC | AACG | GGT   |
|                                                     | (19248) | TA           | -----   | GAGT            | GCTATCTAAC       | CTTA        | ACTTG           | CCT       | GTT          | TGTGAT       | -GG        | TGG           | CAG      | TTT     | GTA  | TG    | TAA--ATAA | ACAT      | G    | CA    |
|                                                     |         | Section 1245 |         |                 |                  |             |                 |           |              |              |            |               |          |         |      |       |           |           |      |       |
| Autographa californica nucleopolyhedrovirus NC 0... | (95789) | 95789        | 95799   | 95810           | 95821            | 95832       | 95843           | 95854     | 95865        |              |            |               |          |         |      |       |           |           |      |       |
|                                                     | (95629) | TCC          | AGT     | AGAC            | TATG             | TGGCG       | GACGCTGT        | TTT       | TTTTG        | GCGAT        | CGA        | CTGTCTA       | TGTT     | AACATCA | TG   | CTCG  | TG        | CCTGT     | AC   |       |
|                                                     | (19315) | TT           | C--     | AC              | ACACCA           | GCTTTT      | GAT             | AAAAG     | TGC          | TTTTG        | TTA        | ATTT          | AAAACAAT | TACC    | ATT  | ---TT | TT        | CTAT      | TAC  | CTG   |
|                                                     |         | Section 1246 |         |                 |                  |             |                 |           |              |              |            |               |          |         |      |       |           |           |      |       |
| Autographa californica nucleopolyhedrovirus NC 0... | (95866) | 95866        | 95876   | 95887           | 95898            | 95909       | 95920           | 95931     | 95942        |              |            |               |          |         |      |       |           |           |      |       |
|                                                     | (95706) | ACT          | AG      | CACA            | GAATT            | GAA         | TTT             | TGGAAA    | TTGTT        | TTT          | TGTCA      | ATGTACA       | ACCGGT   | CGT     | CGT  | CT    | TGTGGGC   | ACGTAC    | ---- | A     |
|                                                     | (19387) | AGT          | --      | CCAT            | GTGA             | -GTC        | TCA             | TGGAAA    | ACAAG        | TAG          | TGTCA      | GATA          | --TA     | GATT    | ---- | ATG   | TACCACT   | AAAGT     | CT   | GTCTA |

SARS-CoV-2 & Autographa californica nucleopolyhedrovirus.apr

|                                                     |         |                                                                                  |         |                                                                                 |              |       |       |       |       |
|-----------------------------------------------------|---------|----------------------------------------------------------------------------------|---------|---------------------------------------------------------------------------------|--------------|-------|-------|-------|-------|
|                                                     |         | Section 1247                                                                     |         |                                                                                 |              |       |       |       |       |
| Autographa californica nucleopolyhedrovirus NC 0... | (95943) | 95943                                                                            | 95953   | 95964                                                                           | 95975        | 95986 | 95997 | 96008 | 96019 |
|                                                     | (95779) | CGATCAAGTT-----TTCGATT-----AATTTGTTGCTACGTCGCTTTGCGGGTCCACCAAAATGTGAGGGAACGC-A   | (19454) | CGTGTATAACACGTTCGAATTAGGTGGTGTCTGTCTGTAGACATCATGCTAAATGAGTACAGATTGTATCTCGATGCT  | Section 1248 |       |       |       |       |
| Autographa californica nucleopolyhedrovirus NC 0... | (96020) | 96020                                                                            | 96030   | 96041                                                                           | 96052        | 96063 | 96074 | 96085 | 96096 |
|                                                     | (95847) | AAAAAGCGATCGCTAATACAAACTTGAAATCTGAAACGGGCACGCCAT-CGTGATG-TATATGTCTTACTTCATTAGA   | (19531) | TATAAATGATGATCTCTAGCTGGCTTTAGCTTGTGGGTTTACAAACAATTGAT-ACTTATAACTT-CTGGA-ACAC    | Section 1249 |       |       |       |       |
| Autographa californica nucleopolyhedrovirus NC 0... | (96097) | 96097                                                                            | 96107   | 96118                                                                           | 96129        | 96140 | 96151 | 96162 | 96173 |
|                                                     | (95922) | C-TTTAGATTATTTTAATTTGTGAACTCGTACCGTATTTCAATAGGGTGTCTGGGCACGTAAATTGTAAATGGTAAACAG | (19605) | TTTACACAGACTTCAGAGTTTAAAGAA--AATGTGGCTTTAATGTTGT-AAATAAGGGACACTTTGATGGACAAACAG  | Section 1250 |       |       |       |       |
| Autographa californica nucleopolyhedrovirus NC 0... | (96174) | 96174                                                                            | 96184   | 96195                                                                           | 96206        | 96217 | 96228 | 96239 | 96250 |
|                                                     | (95998) | ATCCTGTGTAACAC--G-TGCGTTGTTCACCTACGATTTGAAATGCAAAATACATCAAGTACATAACA-CATTGATT    | (19679) | GTGAAGTACAGTTTCTATCATTA--ATAACACTGTTTACACAAAAGTTGATGGTGTGATGTAGAAATTGTTTGA-     | Section 1251 |       |       |       |       |
| Autographa californica nucleopolyhedrovirus NC 0... | (96251) | 96251                                                                            | 96261   | 96272                                                                           | 96283        | 96294 | 96305 | 96316 | 96327 |
|                                                     | (96071) | AGAAAAGG--TAGCAGACAGAAATATTTTCATCTTTAAATCTTATGCTAGTTGAATAAATA----CATAGTACTTTT    | (19753) | AATAAACAACATTACCTGTTAATGTAG--CATTTGAGCTTTGGGCTAGCG-CAACATTAAACCAGTACCAGAGG-     | Section 1252 |       |       |       |       |
| Autographa californica nucleopolyhedrovirus NC 0... | (96328) | 96328                                                                            | 96338   | 96349                                                                           | 96360        | 96371 | 96382 | 96393 | 96404 |
|                                                     | (96142) | -ATACGTTTATTTTATATTTGTTTTCTTTGTTATTAACCGTAATTGTAAACCTGTGATCTGTCTCGCCAGGCATAATT   | (19826) | TGAAAAACTACTCAATAA-TT-TGGGTGTGGACATGTCTGCTAATACTGTGATCTGGGACTACAAAAGAGATGCTCCAG | Section 1253 |       |       |       |       |
| Autographa californica nucleopolyhedrovirus NC 0... | (96405) | 96405                                                                            | 96415   | 96426                                                                           | 96437        | 96448 | 96459 | 96470 | 96481 |
|                                                     | (96218) | TCTTTGCACTCAGCTTGCGAATATATGTGACATCTTCGTACAACGATTTCTTGATGTTACCATCGTGAAAGCGTTGT    | (19901) | CACATATATCTA---CTATTGGTGT-TGTTCTATGACTGACAT---AGCCAAGAAACCACTGAAACGATTTGTGC     |              |       |       |       |       |

SARS-CoV-2 & Autographa californica nucleopolyhedrovirus.apr

|                                                     |         |            |              |              |           |            |       |        |             |                      |
|-----------------------------------------------------|---------|------------|--------------|--------------|-----------|------------|-------|--------|-------------|----------------------|
|                                                     |         |            | Section 1254 |              |           |            |       |        |             |                      |
| Autographa californica nucleopolyhedrovirus NC 0... | (96482) | 96482      | 96492        | 96503        | 96514     | 96525      | 96536 | 96547  | 96558       |                      |
|                                                     | (96295) | CGGCT      | TGAGA        | GTTT         | GCGG      | TCGTT      | GTGT  | TAAAA  | ATT         | TGCACCGAATAA         |
|                                                     | (19971) | ACCAC      | TCACT        | GTC          | TTT       | T-T        | GATG  | GTAG   | AGTT        | GATGGTCAA-GTAGACTTAT |
| SARS-CoV-2 NC_045512.2                              |         |            | Section 1255 |              |           |            |       |        |             |                      |
| Autographa californica nucleopolyhedrovirus NC 0... | (96559) | 96559      | 96569        | 96580        | 96591     | 96602      | 96613 | 96624  | 96635       |                      |
|                                                     | (96377) | AC         | TGATGC       | ATATGCT      | TTAAT     | TTTTT      | ATT   | GCA    | T           | CAGTTATTATATGAT      |
|                                                     | (20046) | TAT        | TACAG        | A            | ---       | AGG        | TAGTG | TTA    | ---         | AAGTTTACA            |
| SARS-CoV-2 NC_045512.2                              |         |            | Section 1256 |              |           |            |       |        |             |                      |
| Autographa californica nucleopolyhedrovirus NC 0... | (96636) | 96636      | 96646        | 96657        | 96668     | 96679      | 96690 | 96701  | 96712       |                      |
|                                                     | (96449) | CGGTTAAAGA | TAACT        | TTCAAT       | TATATAA   | -A         | GT    | GTTTGA | ATT         | GCGAGACCGTCA         |
|                                                     | (20107) | ---        | AATGGAG      | TCACA        | TTAAT     | TGG        | AGAA  | GCC    | GT          | AAAAACA              |
| SARS-CoV-2 NC_045512.2                              |         |            | Section 1257 |              |           |            |       |        |             |                      |
| Autographa californica nucleopolyhedrovirus NC 0... | (96713) | 96713      | 96723        | 96734        | 96745     | 96756      | 96767 | 96778  | 96789       |                      |
|                                                     | (96525) | CTA        | AACGACA      | ATT          | TGCTTTGCT | -G         | TT    | TG     | TGT         | GCACCA               |
|                                                     | (20177) | TCC        | AACA         | ATT          | ACC       | TGAACTTACT | TT    | ACT    | CAG         | AGTAGA               |
| SARS-CoV-2 NC_045512.2                              |         |            | Section 1258 |              |           |            |       |        |             |                      |
| Autographa californica nucleopolyhedrovirus NC 0... | (96790) | 96790      | 96800        | 96811        | 96822     | 96833      | 96844 | 96855  | 96866       |                      |
|                                                     | (96601) | T          | TGGC         | ACAACATT     | --GAA     | T          | ACC   | ATGCA  | CGGCGCTATAA | TGCATCGTTTGTAC       |
|                                                     | (20245) | A          | TGGA         | AATTG        | ---       | ATTTCT     | TTAG  | AATT   | AGTATG      | -GATGA               |
| SARS-CoV-2 NC_045512.2                              |         |            | Section 1259 |              |           |            |       |        |             |                      |
| Autographa californica nucleopolyhedrovirus NC 0... | (96867) | 96867      | 96877        | 96888        | 96899     | 96910      | 96921 | 96932  | 96943       |                      |
|                                                     | (96676) | ACA        | ACT          | GCCCGTTTGCAA | AA        | ACATAAA    | TCT   | CA     | ---         | TAAATT               |
|                                                     | (20300) | TAG        | AAG          | GCTATGCCTTCG | AA        | CATATCG    | TT    | A      | -TGGAGAT    | TTTAGTCA             |
| SARS-CoV-2 NC_045512.2                              |         |            | Section 1260 |              |           |            |       |        |             |                      |
| Autographa californica nucleopolyhedrovirus NC 0... | (96944) | 96944      | 96954        | 96965        | 96976     | 96987      | 96998 | 97009  | 97020       |                      |
|                                                     | (96750) | T          | ---          | TGACAGTATAG  | T         | GAA        | ACGT  | GCTG   | GCAAAA      | TTGATTAT             |
|                                                     | (20370) | ACT        | GATTGGACTAGC | T            | AA        | CGT        | TTTAA | G      | AA          | TCA                  |
| SARS-CoV-2 NC_045512.2                              |         |            |              |              |           |            |       |        |             |                      |

SARS-CoV-2 & Autographa californica nucleopolyhedrovirus.apr

|                                                     |         |                 |                   |                          |                        |                 |                     |               |                                   |
|-----------------------------------------------------|---------|-----------------|-------------------|--------------------------|------------------------|-----------------|---------------------|---------------|-----------------------------------|
|                                                     |         | Section 1261    |                   |                          |                        |                 |                     |               |                                   |
| Autographa californica nucleopolyhedrovirus NC 0... | (97021) | 97021           | 97031             | 97042                    | 97053                  | 97064           | 97075               | 97086         | 97097                             |
|                                                     | (96824) | GGACGTCGCGTACAA | TTATTTGCTGTTGATGG | ACATGGATTGTTGTTGGTGCAAAG | CGTGC                  | AAATGGAAACA     | ATTGTCAA            |               |                                   |
|                                                     | (20444) | T---TAAAAACTATT | TCATA-ACAGATGCGCA | ACAGGTTCACTAAGTGTGT      | GTTTCTGT               | TATTG           | -ATTTATTA           |               |                                   |
|                                                     |         | Section 1262    |                   |                          |                        |                 |                     |               |                                   |
| Autographa californica nucleopolyhedrovirus NC 0... | (97098) | 97098           | 97108             | 97119                    | 97130                  | 97141           | 97152               | 97163         | 97174                             |
|                                                     | (96901) | CCGACACGTA      | TTGTTTGTAGCCGT    | TTTTACGACTCTCA           | AAATTAAATGGTTGTACGCGCC | CAAAAGCG        | GACAAAGTTT          | T             |                                   |
|                                                     | (20515) | CTTGATGAT       | TTTGTGAAATA-ATAAA | TCCC---AAGATT            | TATCTG-----TAGTTT      | CTAAGGTTG       | -----T              |               |                                   |
|                                                     |         | Section 1263    |                   |                          |                        |                 |                     |               |                                   |
| Autographa californica nucleopolyhedrovirus NC 0... | (97175) | 97175           | 97185             | 97196                    | 97207                  | 97218           | 97229               | 97240         | 97251                             |
|                                                     | (96978) | GATAGTTATCT     | TGAAACATATGC      | AACCTTAATTCGAGTCAAAC     | AAGTGCAGCAACATCG       | AAAGAAATTAAT    | TACTGCA             |               |                                   |
|                                                     | (20574) | CAAAGTGA        | CTATTGACTA        | TACAGAAATTCATT           | -----TATGCTTT          | GGTGTA--AAGAT   | GCCATGT-----A       |               |                                   |
|                                                     |         | Section 1264    |                   |                          |                        |                 |                     |               |                                   |
| Autographa californica nucleopolyhedrovirus NC 0... | (97252) | 97252           | 97262             | 97273                    | 97284                  | 97295           | 97306               | 97317         | 97328                             |
|                                                     | (97055) | TTGTGTGGAT      | TTTC              | TTACAATGAAAGCA           | AATGACAAATTTATG        | GTTC            | CAAAATTATATTAACAT   | TGATTATAAAAG  |                                   |
|                                                     | (20635) | ----GAAACA      | T--T              | TTACC                    | CAAAATTACAAT--CTAGT    | CA----AGCGTGGC  | AAACCGGGT           | ----GTTGCT    | ----ATG                           |
|                                                     |         | Section 1265    |                   |                          |                        |                 |                     |               |                                   |
| Autographa californica nucleopolyhedrovirus NC 0... | (97329) | 97329           | 97339             | 97350                    | 97361                  | 97372           | 97383               | 97394         | 97405                             |
|                                                     | (97132) | TGTATTTGCAAT    | TTTACAA           | TTACAGATTTCCC            | ATCAATTTTGAGGAC        | AAACAC          | GATGAAAC            | CTTGTGTAAATTT | AACT                              |
|                                                     | (20692) | CC              | TA--AT--C         | TTTACAA                  | AATGC-----AAAGAA       | TGCTATTAGAA     | AGTGTGACCTT         | C-----AAAT    |                                   |
|                                                     |         | Section 1266    |                   |                          |                        |                 |                     |               |                                   |
| Autographa californica nucleopolyhedrovirus NC 0... | (97406) | 97406           | 97416             | 97427                    | 97438                  | 97449           | 97460               | 97471         | 97482                             |
|                                                     | (97209) | TTTAGA-CGT      | GCGGCAGTTGGAAA    | AC                       | TC                     | AACTGC          | AACCCGTATGCA        | ATTATGTTT     | TACAAAAGT                         |
|                                                     | (20746) | TATG            | GTGATA            | GTGCAACA-----TT          | ACCTAAAG               | GC---ATAATGATGA | AT----GTCGC--       | AA-AA         | ATACTCAACT                        |
|                                                     |         | Section 1267    |                   |                          |                        |                 |                     |               |                                   |
| Autographa californica nucleopolyhedrovirus NC 0... | (97483) | 97483           | 97493             | 97504                    | 97515                  | 97526           | 97537               | 97548         | 97559                             |
|                                                     | (97285) | AATTTATTA       | ATAA              | TAAACAA                  | ATTAATTTAAACAAGCGTTTT  | TAT             | TGACAATACTCACATTTGA | TATTATT       | TATAATCA                          |
|                                                     | (20808) | GTG             | TC                | AA                       | TATTT--AAAC            | ACATTAACA       | TTAGCTGTACCC        | TAT           | AATATGAGAGTTATACATTTTGGTGCTG-GTTC |

SARS-CoV-2 & Autographa californica nucleopolyhedrovirus.apr

|                                                     |         |              |              |                   |               |               |                |                   |               |
|-----------------------------------------------------|---------|--------------|--------------|-------------------|---------------|---------------|----------------|-------------------|---------------|
|                                                     |         | Section 1268 |              |                   |               |               |                |                   |               |
| Autographa californica nucleopolyhedrovirus NC 0... | (97560) | 97560        | 97570        | 97581             | 97592         | 97603         | 97614          | 97625             | 97636         |
|                                                     | (97362) | AGA          | AAATGATGT    | CATTTGTTTTC       | AAAATCGAAC    | TGGCTTTACGAGT | AGAAATTTTAC    | TTGTAAACACACAAT   | CAGGAAAT      |
|                                                     | (20881) | GAT          | AAAGGAGT     | TGCACCAGGT        | ACAGCTG---    | T-TTTAAGACAGT | GGTTGCC        | TACG--GGTACG--CTG | CTTGTCGA      |
|                                                     |         | Section 1269 |              |                   |               |               |                |                   |               |
| Autographa californica nucleopolyhedrovirus NC 0... | (97637) | 97637        | 97647        | 97658             | 97669         | 97680         | 97691          | 97702             | 97713         |
|                                                     | (97439) | GATGTCAT     | TTTTGTACG    | TGATTATAAA        | CATGTTTAAACAT | GGTACATTGA    | ACTTAATTT      | TGCAAGTTG         | ATAACA-       |
|                                                     | (20949) | TTCAGATC     | TTAATGACT    | T-----TGT         | CTCTGATGCAGAT | TCAACTTTGA    | TTGGTGA        | TTGTGCAAC         | TGTACATACAG   |
|                                                     |         | Section 1270 |              |                   |               |               |                |                   |               |
| Autographa californica nucleopolyhedrovirus NC 0... | (97714) | 97714        | 97724        | 97735             | 97746         | 97757         | 97768          | 97779             | 97790         |
|                                                     | (97515) | TG           | ATTAA        | TGTACGACTCATT     | TGTTTGTGCAGT  | TGATAAACGTGAT | TAAATATATGACT  | CATATGTTTG        | TGCAAAAAT     |
|                                                     | (21020) | CT           | ATAAA        | ATGGGATCTCATT     | ATTAGTGATATGT | ACGACCCTAAGA  | CTAAATATG-TTA  | CAAAAGAAAA        | TGACTCTA-     |
|                                                     |         | Section 1271 |              |                   |               |               |                |                   |               |
| Autographa californica nucleopolyhedrovirus NC 0... | (97791) | 97791        | 97801        | 97812             | 97823         | 97834         | 97845          | 97856             | 97867         |
|                                                     | (97592) | GATGTCATCG   | TACAAACTCG   | CTTTACGAGTAGA     | ATTCTAC       | TTGTAACGCAT   | TGATCAAGG      | GATGATGTCAT       | TTGTTTT       |
|                                                     | (21095) | -AAGAGGGTT   | TTTTCTACT    | TACATTTGTG        | GGTTTATACAA   | AAAAGCTAGCT   | CTTGGAGG       | T-TCCGTGGC        | TATAAAGA      |
|                                                     |         | Section 1272 |              |                   |               |               |                |                   |               |
| Autographa californica nucleopolyhedrovirus NC 0... | (97868) | 97868        | 97878        | 97889             | 97900         | 97911         | 97922          | 97933             | 97944         |
|                                                     | (97669) | TTTAA        | AAATTCAACTC  | GCTTTACGAGTAGA    | ATTCTA        | CTGTAAAACACA  | ATTCGAGGGATGAT | GTCATTTGTAGA      | TGA           |
|                                                     | (21170) | TAAC         | AGAACATTCTTG | -GAATGCTGAT       | -CTTTATA      | AGCTCATGGGACA | CTTCGCAT-----  | GGTGGACAGC        | TTTGT         |
|                                                     |         | Section 1273 |              |                   |               |               |                |                   |               |
| Autographa californica nucleopolyhedrovirus NC 0... | (97945) | 97945        | 97955        | 97966             | 97977         | 97988         | 97999          | 98010             | 98021         |
|                                                     | (97746) | TGTC         | ATT          | TGTTTTTCAAACCGAAC | TCGCTTTACGA   | GTAGAA        | TTCTAC         | TTGTAACGCAAGATCG  | GTGGATGATGTCA |
|                                                     | (21240) | TACT         | AAT          | TGTGAA-----       | TGCGTCATCAT   | CTGAAGCATT    | TTTA-ATTG      | G-----ATGT        | AATTATCTTTGG  |
|                                                     |         | Section 1274 |              |                   |               |               |                |                   |               |
| Autographa californica nucleopolyhedrovirus NC 0... | (98022) | 98022        | 98032        | 98043             | 98054         | 98065         | 98076          | 98087             | 98098         |
|                                                     | (97823) | TTTTAA       | AAATGATGTC   | ATCGTACAAACTCGCT  | TACGAGTAGA    | ATTCTACGTGTAA | AAACACGATTA    | CAGCAC            | TTCT          |
|                                                     | (21297) | CAAACC       | ACGC         | GAACAAATAGAT      | GGTT---ATGT   | ----CATGCATGC | -----AAATTACA  | TAT----           | TTTGG         |

## SARS-CoV-2 &amp; Autographa californica nucleopolyhedrovirus.apr

|                                                     |         |                |               |                     |               |                     |                 |              |                              |
|-----------------------------------------------------|---------|----------------|---------------|---------------------|---------------|---------------------|-----------------|--------------|------------------------------|
|                                                     |         | Section 1275   |               |                     |               |                     |                 |              |                              |
| Autographa californica nucleopolyhedrovirus NC 0... | (98099) | 98099          | 98109         | 98120               | 98131         | 98142               | 98153           | 98164        | 98175                        |
|                                                     | (97900) | AGTTGTATCGAA   | AATTGTT       | CAATGGCTCT          | TTGTT         | AATGTCGTAAT         | TGATTAA         | TATGTCGTAC   | AATTGGCGGCGTTG               |
|                                                     | (21352) | AGGAA-----T    | ACAAATC       | CAATTCAGT           | TG-TCT        | TCCT---ATTC         | T-TATT          | TGACATGAGT   | AAATTTCCTTAA                 |
|                                                     |         | Section 1276   |               |                     |               |                     |                 |              |                              |
| Autographa californica nucleopolyhedrovirus NC 0... | (98176) | 98176          | 98186         | 98197               | 98208         | 98219               | 98230           | 98241        | 98252                        |
|                                                     | (97977) | TGTTTTGCACACG  | ACCGTTT       | TTAGT               | TCTTGAAA      | CATTTTTTCGTGTATGT   | TAGCATGTTGTATTT | CAGAGTGC     | GATG                         |
|                                                     | (21418) | TAAAGGG---GT   | ACTGCTG       | TTATG               | TCTTAAA       | --AGAAGGTCAAATCAAT  | TGATATG-----    | -----        | ATTTTAT                      |
|                                                     |         | Section 1277   |               |                     |               |                     |                 |              |                              |
| Autographa californica nucleopolyhedrovirus NC 0... | (98253) | 98253          | 98263         | 98274               | 98285         | 98296               | 98307           | 98318        | 98329                        |
|                                                     | (98054) | TGTAATGCT      | GGTGACGAGC    | ATCAAAA             | TGATAA        | AATCTAA             | AGCGGCTA        | AATTGTAA     | TCCCGTTCATACGCTCTGTAA        |
|                                                     | (21476) | CTCTTCTTA      | GTAAAGTAGA    | -----CT             | TATAA         | TTAGAGA             | -----AA         | CAACAGAG     | TTTGTTATTTCTAGTGTCT          |
|                                                     |         | Section 1278   |               |                     |               |                     |                 |              |                              |
| Autographa californica nucleopolyhedrovirus NC 0... | (98330) | 98330          | 98340         | 98351               | 98362         | 98373               | 98384           | 98395        | 98406                        |
|                                                     | (98131) | CGCCAACTCTGTGG | CCAGATCTT     | TTTAGATTTTGACAGGCGT | TAT           | GGTACGAATTGATAATATT | TAC             | TATAGTT      |                              |
|                                                     | (21543) | TGTTAACT---    | AAACGACAA     | TGT-----            | T---          | TGTTT               | TTCTT-----      | GTTT         | TATGCT                       |
|                                                     |         | Section 1279   |               |                     |               |                     |                 |              |                              |
| Autographa californica nucleopolyhedrovirus NC 0... | (98407) | 98407          | 98417         | 98428               | 98439         | 98450               | 98461           | 98472        | 98483                        |
|                                                     | (98208) | TCTCTTGTATCG   | GTGTT         | GTGATTAACTGT        | TACA          | AACATCA             | CGTTG           | CCAA         | GCGGAGCGGTTTAGACACCGACTT     |
|                                                     | (21588) | -CACTAGTCTCTA  | GTCA          | GTGT---GTTAATC      | TACA          | -----AC             | CAGAACTCAA      | TTACCC       | -----CTGCATACAC--            |
|                                                     |         | Section 1280   |               |                     |               |                     |                 |              |                              |
| Autographa californica nucleopolyhedrovirus NC 0... | (98484) | 98484          | 98494         | 98505               | 98516         | 98527               | 98538           | 98549        | 98560                        |
|                                                     | (98285) | GTTTTTTTGTC    | TGTTCAAATTTGT | AC                  | AAATTAACGCTCA | TAGACTGGT           | CGTCAGGC        | AGTG         | TGTCGTTATACAAAC              |
|                                                     | (21649) | -----TAAT      | TC            | TTT-----CAC         | ACGT-----     | GGT                 | GTTTATTAC       | CCTGACA      | AGTTTTCAG-ATCCT---           |
|                                                     |         | Section 1281   |               |                     |               |                     |                 |              |                              |
| Autographa californica nucleopolyhedrovirus NC 0... | (98561) | 98561          | 98571         | 98582               | 98593         | 98604               | 98615           | 98626        | 98637                        |
|                                                     | (98362) | AAAA           | TGGTAA        | AAAC                | GTTTAATTCGAC  | AAACGA              | CGAGCACA        | TTAAAG       | TTGTTGGCTGTTAACGT            |
|                                                     | (21699) | CAGT           | TTTAC         | ATTC-----           | AACTCA        | ----GGAC            | TTGTTCT         | -----TA----- | CCTGGGGATGTAAACCTTTCTTTTCCAA |

SARS-CoV-2 & Autographa californica nucleopolyhedrovirus.apr

|                                                     |         |       |              |       |       |       |       |       |       |       |
|-----------------------------------------------------|---------|-------|--------------|-------|-------|-------|-------|-------|-------|-------|
|                                                     |         |       | Section 1282 |       |       |       |       |       |       |       |
| Autographa californica nucleopolyhedrovirus NC 0... | (98638) | 98638 | 98648        | 98659 | 98670 | 98681 | 98692 | 98703 | 98714 |       |
|                                                     | (98439) | CTGT  | TTA          | TTCA  | TAA   | CGTA  | AC    | ACTT  | CAATG | TC    |
|                                                     | (21745) | TGT   | TAC          | TTGG  | TTC   | CAT   | GCTA  | ACAT  | G-TC- | TC    |
|                                                     |         |       | Section 1283 |       |       |       |       |       |       |       |
| Autographa californica nucleopolyhedrovirus NC 0... | (98715) | 98715 | 98725        | 98736 | 98747 | 98758 | 98769 | 98780 | 98791 |       |
|                                                     | (98516) | GAT   | TGAG         | CGA   | GGT   | TTG   | AGT   | TTTAT | TTTCT | TAAAT |
|                                                     | (21806) | CC-   | TGTC         | CTA   | CCA   | TTT   | AAT   | TGAT  | ----- | GGTG  |
|                                                     |         |       | Section 1284 |       |       |       |       |       |       |       |
| Autographa californica nucleopolyhedrovirus NC 0... | (98792) | 98792 | 98802        | 98813 | 98824 | 98835 | 98846 | 98857 | 98868 |       |
|                                                     | (98593) | C     | CAG          | CGAT  | CCTT  | GAT   | TGGT  | TTT   | AAT   | CATA  |
|                                                     | (21858) | A     | CA           | TAA   | T-AAG | A     | G     | GC    | TGG   | A     |
|                                                     |         |       | Section 1285 |       |       |       |       |       |       |       |
| Autographa californica nucleopolyhedrovirus NC 0... | (98869) | 98869 | 98879        | 98890 | 98901 | 98912 | 98923 | 98934 | 98945 |       |
|                                                     | (98670) | GTGT  | CGT          | TGT   | TAA   | TAT   | TCGC  | TTTCC | AGG   | TT    |
|                                                     | (21908) | T---  | CCC          | TAC   | TTA   | TG    | TAA   | TAA   | ----  | C     |
|                                                     |         |       | Section 1286 |       |       |       |       |       |       |       |
| Autographa californica nucleopolyhedrovirus NC 0... | (98946) | 98946 | 98956        | 98967 | 98978 | 98989 | 99000 | 99011 | 99022 |       |
|                                                     | (98747) | CAGT  | TGC          | ATGT  | GCG   | ACA   | ACT   | TAT   | CAAT  | GT    |
|                                                     | (21976) | TCCA  | T            | ----- | TT    | T     | G     | ----- | GT    | GTT   |
|                                                     |         |       | Section 1287 |       |       |       |       |       |       |       |
| Autographa californica nucleopolyhedrovirus NC 0... | (99023) | 99023 | 99033        | 99044 | 99055 | 99066 | 99077 | 99088 | 99099 |       |
|                                                     | (98824) | GC    | GTG          | CTC   | AGT   | TC    | GGT   | TCG   | AGT   | T     |
|                                                     | (22024) | AA    | GTG          | AGT   | TCAG  | A     | GT    | TAT   | -TCT  | -AG   |
|                                                     |         |       | Section 1288 |       |       |       |       |       |       |       |
| Autographa californica nucleopolyhedrovirus NC 0... | (99100) | 99100 | 99110        | 99121 | 99132 | 99143 | 99154 | 99165 | 99176 |       |
|                                                     | (98901) | TAG   | T            | TTTT  | TAT   | GT    | CTC   | GTC   | AAA   | TT    |
|                                                     | (22089) | TTA   | T            | G     | GAC   | CT    | T     | G     | A     | AA    |



SARS-CoV-2 & Autographa californica nucleopolyhedrovirus.apr

|                                                     |         |                           |                   |                      |                   |                    |              |             |             |
|-----------------------------------------------------|---------|---------------------------|-------------------|----------------------|-------------------|--------------------|--------------|-------------|-------------|
|                                                     |         | Section 1289              |                   |                      |                   |                    |              |             |             |
| Autographa californica nucleopolyhedrovirus NC 0... | (99177) | 99177                     | 99187             | 99198                | 99209             | 99220              | 99231        | 99242       | 99253       |
|                                                     | (98978) | GAAT-TTAAATATTGGCG        | CGTTTTTCGTT       | GACTTTT              | GTAAATTTAACAACATC | GCCAACAGTTTGTGTAAC | TCGC         | CG          |             |
| SARS-CoV-2 NC_045512.2                              | (22158) | GTTATTTTAAAATATATT        | CTAAGCACAC        | CC---                | TATTA--TT         | -TAGTGCCT          | GATC---      | TCCCTCAGGGT | TTTTCG      |
|                                                     |         | Section 1290              |                   |                      |                   |                    |              |             |             |
| Autographa californica nucleopolyhedrovirus NC 0... | (99254) | 99254                     | 99264             | 99275                | 99286             | 99297              | 99308        | 99319       | 99330       |
|                                                     | (99054) | TTAGCTTGATCTTTGCTAA       | ACAGTTTATTGGTAGC  | GTAATTCACGTTG        | TCGTTCAAA         | AAACAGCAAC         | TCGT         | TGATGAT     |             |
| SARS-CoV-2 NC_045512.2                              | (22226) | GCTTTAGAACAFTGGTAGA       | ATTT-GCC---       | AATAGGTA             | TTAACATCAC        | TAGGTTTC           | AAACTTT      | ACTTG-C     | TTTACAT     |
|                                                     |         | Section 1291              |                   |                      |                   |                    |              |             |             |
| Autographa californica nucleopolyhedrovirus NC 0... | (99331) | 99331                     | 99341             | 99352                | 99363             | 99374              | 99385        | 99396       | 99407       |
|                                                     | (99131) | CATTTTTTGTAAAAGCG         | GTACTTGCTCATG     | TGACAGAA             | CTCTTACATTT       | CAGTTGTAAACGCGTC   | TGTACAAAT    |             |             |
| SARS-CoV-2 NC_045512.2                              | (22298) | --AGAAGTT--ATTTGA         | CTCCTGGTGATTCT    | CTTCAGGT             | TGGACAGG          | TGG-TGCTGCA        | --GCTTAT     | TATGT-GGG   |             |
|                                                     |         | Section 1292              |                   |                      |                   |                    |              |             |             |
| Autographa californica nucleopolyhedrovirus NC 0... | (99408) | 99408                     | 99418             | 99429                | 99440             | 99451              | 99462        | 99473       | 99484       |
|                                                     | (99708) | TGGCCATGCGATTCGGA         | ATGCAACAGGGGA     | TCGTGCGAGCCAGTGCCGTT | TGGCGA            | AAATAGCATTT        | TTTTCATAGCC  | G           |             |
| SARS-CoV-2 NC_045512.2                              | (22366) | TTATCTCAACC               | TAGGAC            | TTTTCTATTAA          | AATAT---          | A-----ATG          | AAAATGGAAC   | CAATTACAGAT | GCT-G       |
|                                                     |         | Section 1293              |                   |                      |                   |                    |              |             |             |
| Autographa californica nucleopolyhedrovirus NC 0... | (99485) | 99485                     | 99495             | 99506                | 99517             | 99528              | 99539        | 99550       | 99561       |
|                                                     | (99285) | CTCGAACAATCGCACGCGTCCGGCG | AAAATTGCAC        | GTGTTCAAA            | TTTCAATTTCAAC     | CGGCCGTCGT         | TGCATAGATA   |             |             |
| SARS-CoV-2 NC_045512.2                              | (22428) | T-AGACTGTGC               | -----             | ACTTGAC              | CCTCTCT--         | CAGAAACAAGTGT      | ACGTTGAAATCC | TTCACTGTAG  |             |
|                                                     |         | Section 1294              |                   |                      |                   |                    |              |             |             |
| Autographa californica nucleopolyhedrovirus NC 0... | (99562) | 99562                     | 99572             | 99583                | 99594             | 99605              | 99616        | 99627       | 99638       |
|                                                     | (99362) | AGGCCTCGGTGTTCCCG         | TATCGTCCACCAAGTCT | CTGTA                | GTGCTCACG         | CATGTTGA           | AGACGA       | CAA         | AATCTCCGC   |
| SARS-CoV-2 NC_045512.2                              | (22488) | AAA---AAGGA---ATC         | TATCAAACT         | -----                | T-----            | CTAACTTTAG         | AG---TCCAAC  | CA--CAG     | AATCTATTG   |
|                                                     |         | Section 1295              |                   |                      |                   |                    |              |             |             |
| Autographa californica nucleopolyhedrovirus NC 0... | (99639) | 99639                     | 99649             | 99660                | 99671             | 99682              | 99693        | 99704       | 99715       |
|                                                     | (99439) | CGGCGGAGAAAAC             | GTGAA             | CCAGCCCA             | GTGGGATCGCAT      | TTCTATCAAG         | TCCGGAGCCTGC | GCGT        | TTACCAAAGCG |
| SARS-CoV-2 NC_045512.2                              | (22542) | TTA-----                  | GATTT             | CCTAAT--             | ATTACAAACT        | --TGTGCC           | TTTTTGG----- | TGAAG       | TTTTTAA--CG |

SARS-CoV-2 & Autographa californica nucleopolyhedrovirus.apr

|                                                     |          |                                                                                  |        |        |        |        |        |        |        |  |  |
|-----------------------------------------------------|----------|----------------------------------------------------------------------------------|--------|--------|--------|--------|--------|--------|--------|--|--|
|                                                     |          | Section 1296                                                                     |        |        |        |        |        |        |        |  |  |
| Autographa californica nucleopolyhedrovirus NC 0... | (99716)  | 99716                                                                            | 99726  | 99737  | 99748  | 99759  | 99770  | 99781  | 99792  |  |  |
|                                                     | (99516)  | TGGAGGCGTTGCAAAAGCCATCCTGGCAGGTCAAACTCGTTTGCAGCGCTGGAGATTCACGCAGTTGTCTCTACACCTG  |        |        |        |        |        |        |        |  |  |
|                                                     | (22593)  | CCACCAGATTTGCAAT-CTGTT--TATGCTTGGAACAGGAAGAATCAGCAACTGTGTTGCTGAT-TATTCCTGTCT     |        |        |        |        |        |        |        |  |  |
|                                                     |          | Section 1297                                                                     |        |        |        |        |        |        |        |  |  |
| Autographa californica nucleopolyhedrovirus NC 0... | (99793)  | 99793                                                                            | 99803  | 99814  | 99825  | 99836  | 99847  | 99858  | 99869  |  |  |
|                                                     | (99593)  | CTGATCCGTCAACGACGGTAACCGGTCAATGAACAATCTACGCCTCGATTGCGCTGAAACGTAAATAATTAAACGGCG   |        |        |        |        |        |        |        |  |  |
|                                                     | (22666)  | ATATAATTC--CGCATCATTTTTCCACTTTTAA--AGT-GTTATGGA--GTGTCT-CCTACTAAATTAAAT-----G    |        |        |        |        |        |        |        |  |  |
|                                                     |          | Section 1298                                                                     |        |        |        |        |        |        |        |  |  |
| Autographa californica nucleopolyhedrovirus NC 0... | (99870)  | 99870                                                                            | 99880  | 99891  | 99902  | 99913  | 99924  | 99935  | 99946  |  |  |
|                                                     | (99670)  | GCGCTTCCAACTCGTTAATGTGCAATGTATGCATCTTGCAAAATAAATTTTGAACAATAATTTAAACGTGTACATGTAC  |        |        |        |        |        |        |        |  |  |
|                                                     | (22728)  | AT-----CTCTGCTTTAATAATGTC-TATGCAGATTCAATTTGTAAATTAGAGGTGAT--GAAGTCAGACAAATCGCT   |        |        |        |        |        |        |        |  |  |
|                                                     |          | Section 1299                                                                     |        |        |        |        |        |        |        |  |  |
| Autographa californica nucleopolyhedrovirus NC 0... | (99947)  | 99947                                                                            | 99957  | 99968  | 99979  | 99990  | 100001 | 100012 | 100023 |  |  |
|                                                     | (99747)  | ACGATTAGTATAATTACCAGTAGAATAAGTATTTGCCAAAAGTTCACATGATCGTCTTAACGTGAATGTGAAAAGCG    |        |        |        |        |        |        |        |  |  |
|                                                     | (22796)  | CCAGGGCAAACCTGG-AAAGATTGCTGATTATAAATTATAAA---TTACACAGATGATTTTA---CAGGCTGCG-----  |        |        |        |        |        |        |        |  |  |
|                                                     |          | Section 1300                                                                     |        |        |        |        |        |        |        |  |  |
| Autographa californica nucleopolyhedrovirus NC 0... | (100024) | 100024                                                                           | 100034 | 100045 | 100056 | 100067 | 100078 | 100089 | 100100 |  |  |
|                                                     | (99824)  | TGGTGTGACGCACGAAATGACTGGTTGCGCAAAAAATAAACCGGGGTCATATAACTTCGGCGTCGACCGCGTTTCATT   |        |        |        |        |        |        |        |  |  |
|                                                     | (22860)  | --TTATA--GCTTGGAATTCTAACAATCTTG-----ATTCATAAGGTGTGTGTGAATTATA-----A              |        |        |        |        |        |        |        |  |  |
|                                                     |          | Section 1301                                                                     |        |        |        |        |        |        |        |  |  |
| Autographa californica nucleopolyhedrovirus NC 0... | (100101) | 100101                                                                           | 100111 | 100122 | 100133 | 100144 | 100155 | 100166 | 100177 |  |  |
|                                                     | (99901)  | TTTAGCGTCATGCATCTGACGGCTAATGTATTGCTCGTTCCTAACCGCGCTCAAAAAGCGGGACGTGAAATACATTT-   |        |        |        |        |        |        |        |  |  |
|                                                     | (22912)  | TTACGTGTATA--GATTGT-----TT-AGGAAGTCTAACTCTCAAACCTTTTGAGAGAGAT-----ATTTCACCT      |        |        |        |        |        |        |        |  |  |
|                                                     |          | Section 1302                                                                     |        |        |        |        |        |        |        |  |  |
| Autographa californica nucleopolyhedrovirus NC 0... | (100178) | 100178                                                                           | 100188 | 100199 | 100210 | 100221 | 100232 | 100243 | 100254 |  |  |
|                                                     | (99977)  | -ATAATACCTATTTGAAAATTACAGTGTAATTGAAAGGTGTGATGTGTTTGCAATGGCGATTGTGTTTGGCCGTGGTGGT |        |        |        |        |        |        |        |  |  |
|                                                     | (22973)  | GAAATCTATCAGGCCGGTAGCACACCTTGTA--AT-G--GTGTGAAGGTTTTAATTGTTACTTTCTTTACAATCA      |        |        |        |        |        |        |        |  |  |

## SARS-CoV-2 &amp; Autographa californica nucleopolyhedrovirus.apr

|                                                     |          |              |              |            |                |            |         |             |           |
|-----------------------------------------------------|----------|--------------|--------------|------------|----------------|------------|---------|-------------|-----------|
|                                                     |          | Section 1303 |              |            |                |            |         |             |           |
| Autographa californica nucleopolyhedrovirus NC 0... | (100255) | 100255       | 100265       | 100276     | 100287         | 100298     | 100309  | 100320      | 100331    |
|                                                     | (100053) | GT           | TGG          | ACCGAAATC  | AG             | CTG        | CA      | AAACAC      | GGACAT    |
|                                                     | (23045)  | TA           | TGG          | TTT---     | CCA            | AC         | CACT    | AA          | TGGT      |
|                                                     |          | Section 1304 |              |            |                |            |         |             |           |
| Autographa californica nucleopolyhedrovirus NC 0... | (100332) | 100332       | 100342       | 100353     | 100364         | 100375     | 100386  | 100397      | 100408    |
|                                                     | (100178) | AC           | TG           | TTATGCGAA  | AA             | AATA       | TGTGT   | GATAGTTG    | ATAAT     |
|                                                     | (23117)  | CA           | TG           | CACCA--GC  | AA             | CTGT       | TGTGT   | GACCTAA--AA | GTCT--TAC |
|                                                     |          | Section 1305 |              |            |                |            |         |             |           |
| Autographa californica nucleopolyhedrovirus NC 0... | (100409) | 100409       | 100419       | 100430     | 100441         | 100452     | 100463  | 100474      | 100485    |
|                                                     | (100205) | ACCA         | AA           | TTTT       | ATTATATCATTTTG | TT         | TTATTTA | ATAAT       | TAAAGAA   |
|                                                     | (23177)  | G-TC         | AA           | TTTT       | CACT           | TCAATGG--T | TT      | AACAGGCA    | CAGGT     |
|                                                     |          | Section 1306 |              |            |                |            |         |             |           |
| Autographa californica nucleopolyhedrovirus NC 0... | (100486) | 100486       | 100496       | 100507     | 100518         | 100529     | 100540  | 100551      | 100562    |
|                                                     | (100282) | TAA          | TTTGATTATTA  | TT         | TTTTG          | AGT        | GCA     | CATT        | AAAA      |
|                                                     | (23244)  | CTT          | T            | C--CAACAAT | TT             | G-GC       | AG      | AG          | A--CATT   |
|                                                     |          | Section 1307 |              |            |                |            |         |             |           |
| Autographa californica nucleopolyhedrovirus NC 0... | (100563) | 100563       | 100573       | 100584     | 100595         | 100606     | 100617  | 100628      | 100639    |
|                                                     | (100359) | AAAT         | ATTATAGTAAAT | AG         | CTGCAAT        | TTT        | GATA    | GCGTAATT    | TAT       |
|                                                     | (23315)  | CTTG         | ACAT         | TAC-----   | AC             | CATGTTT    | TTT     | TGGT        | GGTGTCAGT |
|                                                     |          | Section 1308 |              |            |                |            |         |             |           |
| Autographa californica nucleopolyhedrovirus NC 0... | (100640) | 100640       | 100650       | 100661     | 100672         | 100683     | 100694  | 100705      | 100716    |
|                                                     | (100436) | TG           | ATAC         | G          | CATTATTC       | CAAA       | T       | AACAAA      | AT        |
|                                                     | (23381)  | -CA          | G--          | GTTGC-T    | GTT            | C--T       | TT----- | AT          | ----C     |
|                                                     |          | Section 1309 |              |            |                |            |         |             |           |
| Autographa californica nucleopolyhedrovirus NC 0... | (100717) | 100717       | 100727       | 100738     | 100749         | 100760     | 100771  | 100782      | 100793    |
|                                                     | (100513) | TTTTT        | CAACAATTG    | AAAA       | AT             | TGCA       | AA      | CA          | AACC--A   |
|                                                     | (23429)  | -----        | GCT          | ATT        | C              | ATG        | CAG     | AT          | CAA       |

## SARS-CoV-2 &amp; Autographa californica nucleopolyhedrovirus.apr

|                                                     |          |                |            |                      |          |              |             |              |                |
|-----------------------------------------------------|----------|----------------|------------|----------------------|----------|--------------|-------------|--------------|----------------|
|                                                     |          | Section 1310   |            |                      |          |              |             |              |                |
| Autographa californica nucleopolyhedrovirus NC 0... | (100794) | 100794         | 100804     | 100815               | 100826   | 100837       | 100848      | 100859       | 100870         |
|                                                     | (100588) | CAATTCTATAATGA | AGAAAATT   | GCTAAACACGGCATGAGCGC | GCACATAA | TCGC         | GTGG        | CGCAAAT      | ATCTCGTACG     |
|                                                     | (23489)  | TTTCAA-----AC  | ACGTGCAG   | GCTGTT--TAA-----TAG  | GGGTGAA  | CA-T         | GTCAAC      | -----        | AATCTCATATG    |
|                                                     |          | Section 1311   |            |                      |          |              |             |              |                |
| Autographa californica nucleopolyhedrovirus NC 0... | (100871) | 100871         | 100881     | 100892               | 100903   | 100914       | 100925      | 100936       | 100947         |
|                                                     | (100665) | TACAAAAATAC    | TCGGACA    | TTC                  | TCCAAT   | AGTA         | AAATGCA     | TTTGCT       | ATTATACTGTT    |
|                                                     | (23544)  | -A-GTGTGACA    | TACCCAT    | TGGT                 | G---CAG  | GTA          | TATGCGCT    | -----        | A---GTTATCAGAC |
|                                                     |          | Section 1312   |            |                      |          |              |             |              |                |
| Autographa californica nucleopolyhedrovirus NC 0... | (100948) | 100948         | 100958     | 100969               | 100980   | 100991       | 101002      | 101013       | 101024         |
|                                                     | (100742) | CAATAGTGTAC    | ACGTATG    | TAG                  | ACTTGA   | TAGAT        | GTGCACCATGA | AGAGGT       | TGGT           |
|                                                     | (23607)  | GGCGG          | GACGT      | AG-----              | TGTAGC   | TAGTCAAT     | CCATC-----  | ATTGCC       | TACAC          |
|                                                     |          | Section 1313   |            |                      |          |              |             |              |                |
| Autographa californica nucleopolyhedrovirus NC 0... | (101025) | 101025         | 101035     | 101046               | 101057   | 101068       | 101079      | 101090       | 101101         |
|                                                     | (100819) | ACACGCGC       | GCC        | GCTTA                | TGA      | ACCGC        | GTCCGAAAT   | AGTAATCGAAGG | CAA            |
|                                                     | (23667)  | AAAATTCA       | GTT        | GCTTA                | CCT      | AATAAC       | TCTATTGCC   | ATACCC-----  | ACAAATTT-TACT  |
|                                                     |          | Section 1314   |            |                      |          |              |             |              |                |
| Autographa californica nucleopolyhedrovirus NC 0... | (101102) | 101102         | 101112     | 101123               | 101134   | 101145       | 101156      | 101167       | 101178         |
|                                                     | (100896) | GCCGTGCT       | TACACAC    | GGG                  | GAT      | TGCGATCTGTGC | GCGA        | AGGAT        | TAG            |
|                                                     | (23734)  | AGAAATTC       | T-ACCAGT   | GTCT                 | ATGAC    | C-AAGACAT    | CAGTA       | AGA-T        | TGTAC          |
|                                                     |          | Section 1315   |            |                      |          |              |             |              |                |
| Autographa californica nucleopolyhedrovirus NC 0... | (101179) | 101179         | 101189     | 101200               | 101211   | 101222       | 101233      | 101244       | 101255         |
|                                                     | (100973) | TAGT           | CAAG       | ATG                  | CGT      | TGGAG        | GAT         | GAC          | GGCC           |
|                                                     | (23805)  | AATG           | CAGC       | AAT                  | CTTT-TG  | -TTGC        | ---AAT      | -----        | ATGG           |
|                                                     |          | Section 1316   |            |                      |          |              |             |              |                |
| Autographa californica nucleopolyhedrovirus NC 0... | (101256) | 101256         | 101266     | 101277               | 101288   | 101299       | 101310      | 101321       | 101332         |
|                                                     | (101047) | TTGGATC        | GAGAACGCGC | CCGATCGTGT           | AA       | CCCAACA      | CGG         | GTGT         | GGTTGTTG       |
|                                                     | (23866)  | TGGAATAG       | -CTGTTGAA  | CAAG--ACAA           | AA       | ACCCAA       | GAA         | GT           | TT--TTGCACAAG  |

SARS-CoV-2 & Autographa californica nucleopolyhedrovirus.apr

|                                                     |          |                                                                                |        |        |        |        |        |        |        |  |
|-----------------------------------------------------|----------|--------------------------------------------------------------------------------|--------|--------|--------|--------|--------|--------|--------|--|
|                                                     |          | Section 1317                                                                   |        |        |        |        |        |        |        |  |
| Autographa californica nucleopolyhedrovirus NC 0... | (101333) | 101333                                                                         | 101343 | 101354 | 101365 | 101376 | 101387 | 101398 | 101409 |  |
|                                                     | (101124) | TG--TTTGTGCAACTGCTTACGGCCCGGACTTGTCTACGCAGCTCAACATGTACGAAGACTGCAACGTGCCCGTG    |        |        |        |        |        |        |        |  |
| SARS-CoV-2 NC_045512.2                              | (23935)  | ACACCAATTAAGAATTTGGTGGTTTTTAATTTT-----CACAAATATTACC-----AGATCCATCA--AAACCAAGC  |        |        |        |        |        |        |        |  |
|                                                     |          | Section 1318                                                                   |        |        |        |        |        |        |        |  |
| Autographa californica nucleopolyhedrovirus NC 0... | (101410) | 101410                                                                         | 101420 | 101431 | 101442 | 101453 | 101464 | 101475 | 101486 |  |
|                                                     | (101199) | CTGCGCGCTTCACGGCCGTATCGACAATATCAACAGCGCTTCGATCCGGTGCTGTGCGACGACGGGTACGTGAGCG   |        |        |        |        |        |        |        |  |
| SARS-CoV-2 NC_045512.2                              | (24002)  | AAGAGGTCA-----TTATTTGAAGATCTACTTTTCAACAAAGTGACACTTGCA-----G--ATGTG             |        |        |        |        |        |        |        |  |
|                                                     |          | Section 1319                                                                   |        |        |        |        |        |        |        |  |
| Autographa californica nucleopolyhedrovirus NC 0... | (101487) | 101487                                                                         | 101497 | 101508 | 101519 | 101530 | 101541 | 101552 | 101563 |  |
|                                                     | (101276) | ACTATAACGCGACACCGAAACTCCGTATTGCCGTCCGCGCACTGTGCGCGACGTAATGTACGACGAGAGT         |        |        |        |        |        |        |        |  |
| SARS-CoV-2 NC_045512.2                              | (24061)  | CAT--CAAAACAATATGGTG-----ATTGCCCTGGTGATATTGCTGCTAGAGACCTCAT--TTGTGCACAAAAGT    |        |        |        |        |        |        |        |  |
|                                                     |          | Section 1320                                                                   |        |        |        |        |        |        |        |  |
| Autographa californica nucleopolyhedrovirus NC 0... | (101564) | 101564                                                                         | 101574 | 101585 | 101596 | 101607 | 101618 | 101629 | 101640 |  |
|                                                     | (101353) | CCGCGGGCGCCATGCGCAGACGGCCAGGTTCGTCTGGATCATCCGGCGCTCAATGATTTTACCGCAGACACTTTAG   |        |        |        |        |        |        |        |  |
| SARS-CoV-2 NC_045512.2                              | (24126)  | TTAACGGCCTTA----CTGTTTTGCACCTTTGCTCACAGATGAATGATT--G-----CTCAATACACT----       |        |        |        |        |        |        |        |  |
|                                                     |          | Section 1321                                                                   |        |        |        |        |        |        |        |  |
| Autographa californica nucleopolyhedrovirus NC 0... | (101641) | 101641                                                                         | 101651 | 101662 | 101673 | 101684 | 101695 | 101706 | 101717 |  |
|                                                     | (101430) | ACTCGAAGACATTTGCGTGATCGACCCTTGCTCGTTGGACCCGATTAGCGGGCAACGCACATCGGGACGCTTATTT   |        |        |        |        |        |        |        |  |
| SARS-CoV-2 NC_045512.2                              | (24185)  | ---T-CTGCACGTGTT---AGC--GGGTACAATCACTTCTGGTTGGACCTTTG--GTGCAG---GTGCTGCATTA--C |        |        |        |        |        |        |        |  |
|                                                     |          | Section 1322                                                                   |        |        |        |        |        |        |        |  |
| Autographa californica nucleopolyhedrovirus NC 0... | (101718) | 101718                                                                         | 101728 | 101739 | 101750 | 101761 | 101772 | 101783 | 101794 |  |
|                                                     | (101507) | ACCAACCAACCGTAAATGGTGTTGGGAATCAACGGATGCAATTGTTCGGGCCGATGACGGGTACTCTGCCCGTGT    |        |        |        |        |        |        |        |  |
| SARS-CoV-2 NC_045512.2                              | (24246)  | AAATACCAATTTGCTATGCAAAATGGCTTATAGGTTTAATGGTATTGGAGTTACACAGAATGTTCTCTATGAGAACCA |        |        |        |        |        |        |        |  |
|                                                     |          | Section 1323                                                                   |        |        |        |        |        |        |        |  |
| Autographa californica nucleopolyhedrovirus NC 0... | (101795) | 101795                                                                         | 101805 | 101816 | 101827 | 101838 | 101849 | 101860 | 101871 |  |
|                                                     | (101584) | CGACACACCGGCCGACACGGGCAATGGTTAGACAAAAGCAACGCACCGTCCGGAACGCTTGCTTGAGCGCGT       |        |        |        |        |        |        |        |  |
| SARS-CoV-2 NC_045512.2                              | (24323)  | AAATTGATTGCCAACCAATTTAATAGTGCTATTGGCAAAATTCAAGACTCACTTTC--TTCCAAGCAAGTGC       |        |        |        |        |        |        |        |  |

## SARS-CoV-2 &amp; Autographa californica nucleopolyhedrovirus.apr

|                                                     |          |                                                                                                                                                             |        |        |        |        |        |        |        |
|-----------------------------------------------------|----------|-------------------------------------------------------------------------------------------------------------------------------------------------------------|--------|--------|--------|--------|--------|--------|--------|
|                                                     |          | Section 1324                                                                                                                                                |        |        |        |        |        |        |        |
| Autographa californica nucleopolyhedrovirus NC 0... | (101872) | 101872                                                                                                                                                      | 101882 | 101893 | 101904 | 101915 | 101926 | 101937 | 101948 |
|                                                     | (101661) | G C A C A T G T T A T C G T T G C G T C A T G T G G A T T A C A A T T T T T C T G G G G C C G C A G C G A C C A C A C C G A G T T T G C C G A C G C G G     |        |        |        |        |        |        |        |
|                                                     | (24398)  | G G A A A A C T T C A A G A T G T - G G T C A A C C A A A A T G C A C A A G C T T T A A A C A C G C T T G T T A A A C A A C T T A G - - - C T C A A T       |        |        |        |        |        |        |        |
|                                                     |          | Section 1325                                                                                                                                                |        |        |        |        |        |        |        |
| Autographa californica nucleopolyhedrovirus NC 0... | (101949) | 101949                                                                                                                                                      | 101959 | 101970 | 101981 | 101992 | 102003 | 102014 | 102025 |
|                                                     | (101738) | A C A T G G T G T T T C A A G C G A A T G T C A A C C A A C T C A G T C A C G A A C G G T A T C G A G C G A T T T T G T A C T C G T T G C T C G A G T C G   |        |        |        |        |        |        |        |
|                                                     | (24470)  | T T T G G T G C A A T T T C A - - - A G T G T T T T A A A T G A T A T C C T T T C A C G T C T T G A C A A A G T T G A G G C T G A A G T G C A A A T T G A   |        |        |        |        |        |        |        |
|                                                     |          | Section 1326                                                                                                                                                |        |        |        |        |        |        |        |
| Autographa californica nucleopolyhedrovirus NC 0... | (102026) | 102026                                                                                                                                                      | 102036 | 102047 | 102058 | 102069 | 102080 | 102091 | 102102 |
|                                                     | (101815) | C A C C C G G A C G T A A C A G A A A T C G T A A C A G T C A A C A T G G G T G T C A T G A A A A T T T C C G T G T C A T A C G A T A C C A C A T T G A A   |        |        |        |        |        |        |        |
|                                                     | (24544)  | T A G G T T G - A T C A C A G G C A G A C T T C A A A G T T T G C A G A C A T A T G T G A C T C A A C A A - - - - T T A A T T A G A G C T G C A G A A A     |        |        |        |        |        |        |        |
|                                                     |          | Section 1327                                                                                                                                                |        |        |        |        |        |        |        |
| Autographa californica nucleopolyhedrovirus NC 0... | (102103) | 102103                                                                                                                                                      | 102113 | 102124 | 102135 | 102146 | 102157 | 102168 | 102179 |
|                                                     | (101892) | A A A T A T A C T A T T A C C A T C T T C T G T T T T T A G G C T A T T T A G A T T T A A A G A A A G T G G C A C T G C T C A G C C G G T A T G C T T C T   |        |        |        |        |        |        |        |
|                                                     | (24615)  | T C A - - - - - G A G C T T C T - G C T A A T C T T T G C T G C T A C T A A A A T G T C A G A G T G T G T A C T T G G A C A A T C A A A A A G A G - - - -   |        |        |        |        |        |        |        |
|                                                     |          | Section 1328                                                                                                                                                |        |        |        |        |        |        |        |
| Autographa californica nucleopolyhedrovirus NC 0... | (102180) | 102180                                                                                                                                                      | 102190 | 102201 | 102212 | 102223 | 102234 | 102245 | 102256 |
|                                                     | (101969) | T T C C A G G C G T A G G A C G G T G C A T A A C C G T C A A T T C C G A T T C G T G C A T C A G G C G A C A C G C T G G T G G T C A A G T G T G A C C     |        |        |        |        |        |        |        |
|                                                     | (24681)  | - - - - - T T G A T T T T T G T G G A A A G G - G C T A T C A T C T T A T G T C C T - - - - - T C C T C A G T C A G C A C C T C A - - T G G T G T A G       |        |        |        |        |        |        |        |
|                                                     |          | Section 1329                                                                                                                                                |        |        |        |        |        |        |        |
| Autographa californica nucleopolyhedrovirus NC 0... | (102257) | 102257                                                                                                                                                      | 102267 | 102278 | 102289 | 102300 | 102311 | 102322 | 102333 |
|                                                     | (102046) | G C A G A A A C G T T C A C C A A C T C G T G G T G T G T A C T G A G T C G T G A A G G T A C G C A T A T A A A A G T T T G G A G T C G C G C G T C A C G   |        |        |        |        |        |        |        |
|                                                     | (24744)  | T C T T C T T G C A T G T - G A C T A T A T G T C C C T G C A C A A G A A - - A A G A A C T T C A C A A C T - - - - G C T C C T G C C A T T - T G T C A T G |        |        |        |        |        |        |        |
|                                                     |          | Section 1330                                                                                                                                                |        |        |        |        |        |        |        |
| Autographa californica nucleopolyhedrovirus NC 0... | (102334) | 102334                                                                                                                                                      | 102344 | 102355 | 102366 | 102377 | 102388 | 102399 | 102410 |
|                                                     | (102123) | A T A T C C A C G C G G A G A C G C G C C T G C A G C G T T A A G A T T G C G C G G C T T C T T T C T G A A C A A C G A T C G C G A A C G A A A C A C A A   |        |        |        |        |        |        |        |
|                                                     | (24813)  | A T G G A A A A G C A C A C T T T C T C G T G A A G G T G T C T T T G T T T C A A A T G G C A C A - - - - - C A C T G - - G T T T G T A A C A C A A         |        |        |        |        |        |        |        |

## SARS-CoV-2 &amp; Autographa californica nucleopolyhedrovirus.apr

|                                                     |          |              |            |             |              |              |                 |            |                            |
|-----------------------------------------------------|----------|--------------|------------|-------------|--------------|--------------|-----------------|------------|----------------------------|
|                                                     |          | Section 1331 |            |             |              |              |                 |            |                            |
| Autographa californica nucleopolyhedrovirus NC 0... | (102411) | 102411       | 102421     | 102432      | 102443       | 102454       | 102465          | 102476     | 102487                     |
|                                                     | (102200) | TAAAGAGCGG   | TCACTACAGG | CGACATGACC  | CAAGGCAACAA  | ATAGACGCAT   | TAACCCAAAT      | ACTTGA     | AACTTACCCC                 |
| SARS-CoV-2 NC_045512.2                              | (24881)  | -AGGAATTT    | TATGAACCA  | CAATCATTAC  | TACAGACAACA  | CATTTGTGTC   | TGGTA----       | ACTGTG     | ATGTTGTAA-                 |
|                                                     |          | Section 1332 |            |             |              |              |                 |            |                            |
| Autographa californica nucleopolyhedrovirus NC 0... | (102488) | 102488       | 102498     | 102509      | 102520       | 102531       | 102542          | 102553     | 102564                     |
|                                                     | (102277) | AACTACTCTGTA | TAACAACA   | TGAGCATT    | TTAAAGT      | TGTAGAAGCGTG | CAATTTGGCACACAC | TTTTTTTAA  | AATTGG                     |
| SARS-CoV-2 NC_045512.2                              | (24951)  | -----TAGGAAT | TGTCAACA   | ACAC--AG    | TTTATGAT     | CC---TTTGCAA | CTGAATTAGAC     | -----TC    | ATTCAA                     |
|                                                     |          | Section 1333 |            |             |              |              |                 |            |                            |
| Autographa californica nucleopolyhedrovirus NC 0... | (102565) | 102565       | 102575     | 102586      | 102597       | 102608       | 102619          | 102630     | 102641                     |
|                                                     | (102354) | GTTATTTATTT  | TAGGGCC    | AAAGACTTGT  | TTGGATATCGCT | TTAGATAATTT  | TGAAC           | TATTGCGTC  | GAAAGACTAACATA             |
| SARS-CoV-2 NC_045512.2                              | (25009)  | GGAGG---AG   | TTAGATA    | AAATA-----  | TTTAAAGAAT   | CAT-ACAT     | CACCAGA-TG      | TGATTTAG   | GTGACATCTCTGGC             |
|                                                     |          | Section 1334 |            |             |              |              |                 |            |                            |
| Autographa californica nucleopolyhedrovirus NC 0... | (102642) | 102642       | 102652     | 102663      | 102674       | 102685       | 102696          | 102707     | 102718                     |
|                                                     | (102431) | AAAGAACTGG   | CAGTCA     | TGTTAAACAA  | GAAACTACAG   | AGTGTGTTG    | CAATTGAAAC      | GAAATA     | GATAAAAAATTC               |
| SARS-CoV-2 NC_045512.2                              | (25076)  | ATTAATGCTT   | CAGTTG     | TAAACATTCA  | AAAAGAAATTG  | -ACCGCT      | CAATGAGGTT      | GCCAA---   | GAT--TTAAATGA              |
|                                                     |          | Section 1335 |            |             |              |              |                 |            |                            |
| Autographa californica nucleopolyhedrovirus NC 0... | (102719) | 102719       | 102729     | 102740      | 102751       | 102762       | 102773          | 102784     | 102795                     |
|                                                     | (102508) | ACAACTGTG    | TTTTAATAAA | AAATTTACACT | ATCAAATGA    | TGACATC      | ATAACGGGTT      | CAATAT     | TCGTGTGCAAAAAATAA          |
| SARS-CoV-2 NC_045512.2                              | (25147)  | ATCTCTCAT    | TC-GATCTCC | AAGAACCTTGG | AAAGTATGA    | GCAAGTAT     | ATAA            | AA-TGG--CC | ATGGTACATTTTGGCTAGGT       |
|                                                     |          | Section 1336 |            |             |              |              |                 |            |                            |
| Autographa californica nucleopolyhedrovirus NC 0... | (102796) | 102796       | 102806     | 102817      | 102828       | 102839       | 102850          | 102861     | 102872                     |
|                                                     | (102585) | ATGACATCATAT | TTCAAAC    | TTGTTTAC    | GCGTAA       | AAT          | TCTACTGGTAA     | ACAAG      | TTTGAGATATGATGTCATCATCA    |
| SARS-CoV-2 NC_045512.2                              | (25220)  | TTTATAGCTGGC | TT-----    | GATTG       | CATAGT       | AAT          | -GGTGACAATT     | ATGCTT     | T-----GCTGTATGACCAAGTT     |
|                                                     |          | Section 1337 |            |             |              |              |                 |            |                            |
| Autographa californica nucleopolyhedrovirus NC 0... | (102873) | 102873       | 102883     | 102894      | 102905       | 102916       | 102927          | 102938     | 102949                     |
|                                                     | (102662) | CAAA         | TAATAGTATG | TAATAA      | AA           | TAAACATAT    | TTGTG           | TGTTAAAT   | ATAATTTATTA                |
| SARS-CoV-2 NC_045512.2                              | (25281)  | GCTGTAG----- | TGTCTC     | AA          | GGGCTG       | TGTCT        | -TGTGGAT        | -CCT---    | GCTGCAAAATTGATGAAGA-----CG |

## SARS-CoV-2 &amp; Autographa californica nucleopolyhedrovirus.apr

|                                                     |          |              |           |            |               |            |            |          |                                  |
|-----------------------------------------------------|----------|--------------|-----------|------------|---------------|------------|------------|----------|----------------------------------|
|                                                     |          | Section 1338 |           |            |               |            |            |          |                                  |
| Autographa californica nucleopolyhedrovirus NC 0... | (102950) | 102950       | 102960    | 102971     | 102982        | 102993     | 103004     | 103015   | 103026                           |
|                                                     | (102739) | ATCTGTCTTC   | GTGTTTGTT | GTAAAGGTCT | TCGAA         | TCTTGTTGTT | TCAGC      | CCCTCGGG | ATGGTCAAAATGCGCCGTAGTA           |
|                                                     | (25341)  | ACT-----CT   | GAG---CCA | GT-----GC  | TCAAA         | GGAGTCAAA  | T--TAC     | ATTACAC  | ATAAACGAACTTATGGATTGT            |
|                                                     |          | Section 1339 |           |            |               |            |            |          |                                  |
| Autographa californica nucleopolyhedrovirus NC 0... | (103027) | 103027       | 103037    | 103048     | 103059        | 103070     | 103081     | 103092   | 103103                           |
|                                                     | (102816) | ATTGTTA      | ATGGA     | TC         | TTTTCAACGATTT | TTTGCC     | ATGGCGAGT  | TG       | TGACAAACGCGGCCACGA               |
|                                                     | (25403)  | TATGAG       | AATCT     | TCAC-----  | AA            | TTGGA      | CTGTAA--   | CT       | TGAGCAAG--GTGAATCAAGGATGCTACTCCT |
|                                                     |          | Section 1340 |           |            |               |            |            |          |                                  |
| Autographa californica nucleopolyhedrovirus NC 0... | (103104) | 103104       | 103114    | 103125     | 103136        | 103147     | 103158     | 103169   | 103180                           |
|                                                     | (102893) | CAGTTT       | TCATG     | GTGTT      | CTATAT        | TT         | TCGACAA    | TATATGG  | TCGCTTCTAAATCACCTTG              |
|                                                     | (25468)  | TCAGAT       | T-TT      | GTTCG      | CGC--         | TACTG      | CAACGATACC | GATA     | CAAGCCTCAG--TCCC                 |
|                                                     |          | Section 1341 |           |            |               |            |            |          |                                  |
| Autographa californica nucleopolyhedrovirus NC 0... | (103181) | 103181       | 103191    | 103202     | 103213        | 103224     | 103235     | 103246   | 103257                           |
|                                                     | (102970) | TT           | TTTT      | AGAA       | CACG          | TTG        | TGT        | AT       | TTCCACACAGTAA                    |
|                                                     | (25539)  | CG           | TTGC      | ACTT       | C--T          | TGC        | TGT        | TTT      | CAGAGCGCTTCCAAAATCAT             |
|                                                     |          | Section 1342 |           |            |               |            |            |          |                                  |
| Autographa californica nucleopolyhedrovirus NC 0... | (103258) | 103258       | 103268    | 103279     | 103290        | 103301     | 103312     | 103323   | 103334                           |
|                                                     | (103047) | TGT          | AA        | TCAT       | TGC           | TGA        | ATT        | AA       | TTTACAAACAAT                     |
|                                                     | (25612)  | TCC          | AA        | GGG        | TGT           | TCA        | TT         | TG       | TTTGCAACTTGCTGTTGT               |
|                                                     |          | Section 1343 |           |            |               |            |            |          |                                  |
| Autographa californica nucleopolyhedrovirus NC 0... | (103335) | 103335       | 103345    | 103356     | 103367        | 103378     | 103389     | 103400   | 103411                           |
|                                                     | (103124) | TG-----      | TAC       | ATTG       | TTTT          | CTAAAG     | TT         | AGT      | TAGCGGTAGT                       |
|                                                     | (25682)  | TTGCTGCTGG   | CC        | TTGAAG     | CCCTT         | TT         | CTC        | TAT      | CTTTATGCTTTAG                    |
|                                                     |          | Section 1344 |           |            |               |            |            |          |                                  |
| Autographa californica nucleopolyhedrovirus NC 0... | (103412) | 103412       | 103422    | 103433     | 103444        | 103455     | 103466     | 103477   | 103488                           |
|                                                     | (103195) | GATA         | AA        | AC         | AAT           | GC         | CCAAA      | CT       | ATACATGTCAT                      |
|                                                     | (25759)  | ATAAT        | AA        | TGAG       | GC            | TTTGG      | CT         | TTGC     | TGGAATGCCGTTCCAAAACCAT           |



## SARS-CoV-2 &amp; Autographa californica nucleopolyhedrovirus.apr

|                                                     |          |              |                 |              |               |              |                   |                   |                       |
|-----------------------------------------------------|----------|--------------|-----------------|--------------|---------------|--------------|-------------------|-------------------|-----------------------|
|                                                     |          | Section 1345 |                 |              |               |              |                   |                   |                       |
| Autographa californica nucleopolyhedrovirus NC 0... | (103489) | 103489       | 103499          | 103510       | 103521        | 103532       | 103543            | 103554            | 103565                |
|                                                     | (103272) | AAGTTATATTT  | TGAGGGTTGTT     | TTTGATAAACG  | TTTGTGATAGACT | TGGCAACA     | TGCCGCCACAT       | ACAAATCAAAAG      |                       |
|                                                     | (25826)  | ATTTCCTTGC   | TGGCATACTAA     | TTGTTACG-AC  | TATGTGATAGCCT | TAGAAATAG    | TGTAACTTCTTC      | AATTGTC-ATT       |                       |
|                                                     |          | Section 1346 |                 |              |               |              |                   |                   |                       |
| Autographa californica nucleopolyhedrovirus NC 0... | (103566) | 103566       | 103576          | 103587       | 103598        | 103609       | 103620            | 103631            | 103642                |
|                                                     | (103349) | TGGGGCCCA    | GTCATGAAAT      | ATCTTCGGGA   | TTAATATTGTGG  | TGCACGAT     | ATTACGGATGAATCGCT | TTTACGGC          |                       |
|                                                     | (25900)  | ACTTCAGGT    | GATGGCACAA      | CAAGTCCTATT  | CTGAACATGAC   | TACAGAT      | TGGTTA            | TACTGAAAAATGGGAAT | C                     |
|                                                     |          | Section 1347 |                 |              |               |              |                   |                   |                       |
| Autographa californica nucleopolyhedrovirus NC 0... | (103643) | 103643       | 103653          | 103664       | 103675        | 103686       | 103697            | 103708            | 103719                |
|                                                     | (103426) | GCTCACC      | AAATCAACA       | AACTTGCTAAT  | ATAAAGCCAA    | ATTCGGCCGGA  | ACTTTAATGTTGGTCT  | TTTGCAAAAGTTT     |                       |
|                                                     | (25977)  | ----TGG      | AGTAAAGACTG     | TGTTGTATTAC  | ACAGT--TACT   | TCAGTTACAGAC | TATT-ACCAGCTG     | TACTCAAACTCA-     |                       |
|                                                     |          | Section 1348 |                 |              |               |              |                   |                   |                       |
| Autographa californica nucleopolyhedrovirus NC 0... | (103720) | 103720       | 103730          | 103741       | 103752        | 103763       | 103774            | 103785            | 103796                |
|                                                     | (103503) | GCAAATTGCG   | TTGTTTTCA       | AATAGTCGCTC  | ACATGTACTCGT  | TTAGAGGCG    | ACGC              | AAATATATATGC      | GGTGCTGCCGC           |
|                                                     | (26046)  | ----ATTGAGT  | ACAGACA         | CTGGTG-TTGAA | CATGTACTCTT   | TCATCTACA    | ATAAAAT           | TGTTGATGAGC       | CTGAAGA               |
|                                                     |          | Section 1349 |                 |              |               |              |                   |                   |                       |
| Autographa californica nucleopolyhedrovirus NC 0... | (103797) | 103797       | 103807          | 103818       | 103829        | 103840       | 103851            | 103862            | 103873                |
|                                                     | (103580) | GGATTCAAA    | ATAAA           | CAATTGTT     | TCGGGTTCAT    | G-GTATACAGT  | TAAAGTGT          | TAAACCGCT         | CACTAAATTCAGACACGAG   |
|                                                     | (26118)  | ACATGTCC     | AAATT           | CACACAA      | TCGACGGTTCAT  | CCGGAGTTGT   | TAAATCCAGTAA      | TGGAA             | CAATTTATGATGAACCGA    |
|                                                     |          | Section 1350 |                 |              |               |              |                   |                   |                       |
| Autographa californica nucleopolyhedrovirus NC 0... | (103874) | 103874       | 103884          | 103895       | 103906        | 103917       | 103928            | 103939            | 103950                |
|                                                     | (103656) | CGCACGC      | CCCTATATACATACA | ATTATTCGCA   | CAAGATGCT     | TACGCGATCTGT | TATAAAC           | TAAACGCAC         | TGCAAT                |
|                                                     | (26195)  | CGACGA       | CTACTAGCGTGC    | -----CTT     | TGTAAAGCA     | CAAGCTGATG   | -----AGT          | ACGAACT           | TATGTACTCATTCGTT      |
|                                                     |          | Section 1351 |                 |              |               |              |                   |                   |                       |
| Autographa californica nucleopolyhedrovirus NC 0... | (103951) | 103951       | 103961          | 103972       | 103983        | 103994       | 104005            | 104016            | 104027                |
|                                                     | (103733) | AAATTTT      | AGCAAG          | CATTTG       | TATTTAAT      | CAATCGAAC    | CGTGCAC           | TGATATAAGAAT      | TAAATGGGTTTGT         |
|                                                     | (26260)  | TCGGAAG      | AGACAG          | GTACGT       | TAAATAGT      | TAAATAGCGTAC | TCTTTTCT          | TGCTTTTCG         | TGGTATCTTGCTAGTTTCACT |

## SARS-CoV-2 &amp; Autographa californica nucleopolyhedrovirus.apr

|                                                     |          |        |            |                |                     |         |          |         |              |                  |           |        |            |          |          |              |       |        |     |         |
|-----------------------------------------------------|----------|--------|------------|----------------|---------------------|---------|----------|---------|--------------|------------------|-----------|--------|------------|----------|----------|--------------|-------|--------|-----|---------|
|                                                     |          |        |            |                |                     |         |          |         |              | Section 1352     |           |        |            |          |          |              |       |        |     |         |
| Autographa californica nucleopolyhedrovirus NC 0... | (104028) | 104028 | 104038     | 104049         | 104060              | 104071  | 104082   | 104093  | 104104       |                  |           |        |            |          |          |              |       |        |     |         |
|                                                     | (103810) | TTG    | CA         | CAAAATACA      | CAAGG               | CTG     | TCGACCGA | CAC     | AAAAA        | TGAAGTTT         | TCCC      | TATGT  | TGCGT      | TGTCGT   | ACAT     | CAAC         | CGT   | GA     |     |         |
|                                                     | (26337)  | AGC    | CA         | TCCTTACTG      | CGCTT               | CGATT   | T-GTGTG  | CGT     | ACTGC        | TGCAATAT         | TGT       | TAA    | CGTGA      | GTCT     | TGTAA    | AAAC         | CTTCT | TTT    |     |         |
|                                                     |          |        |            |                |                     |         |          |         |              | Section 1353     |           |        |            |          |          |              |       |        |     |         |
| Autographa californica nucleopolyhedrovirus NC 0... | (104105) | 104105 | 104115     | 104126         | 104137              | 104148  | 104159   | 104170  | 104181       |                  |           |        |            |          |          |              |       |        |     |         |
|                                                     | (103887) | CG     | CTG        | TGCAC          | CTACACCGCC          | ATGT    | TGG      | TGGGA   | TAC          | ATGGTAA          | CATTCAAT  | TGACTC | CAGCGAATT  | GAAATATT | TACA     |              |       |        |     |         |
|                                                     | (26413)  | TAG    | CGT        | TACT           | CTCGTGTTAA          | AAAT    | CTGA     | AATTCT  | TCT          | AGA              | GTTCTC    | TGATCT | TCTGGT     | CTAAAC   | ---      | GAACTAA      | TATT  |        |     |         |
|                                                     |          |        |            |                |                     |         |          |         |              | Section 1354     |           |        |            |          |          |              |       |        |     |         |
| Autographa californica nucleopolyhedrovirus NC 0... | (104182) | 104182 | 104192     | 104203         | 104214              | 104225  | 104236   | 104247  | 104258       |                  |           |        |            |          |          |              |       |        |     |         |
|                                                     | (103963) | ATA    | CT         | TGGTTGCTGTTGTC | GTTTTT              | GATG    | TCC      | TGGTGC  | TAA          | ACGCTCCGACTCTGTG | GAC       | GATGCT | CAA        | AACC     | AC       | AG           |       |        |     |         |
|                                                     | (26487)  | ATA    | T          | -----A         | GTTTTT              | CTGT    | TGGA     | AC-TT   | TAA          | TTTTAG           | -----CCAT | GCG    | CAGATTC    | CAA      | CGGT     | AC           | TA    |        |     |         |
|                                                     |          |        |            |                |                     |         |          |         |              | Section 1355     |           |        |            |          |          |              |       |        |     |         |
| Autographa californica nucleopolyhedrovirus NC 0... | (104259) | 104259 | 104269     | 104280         | 104291              | 104302  | 104313   | 104324  | 104335       |                  |           |        |            |          |          |              |       |        |     |         |
|                                                     | (104040) | AAG    | CC         | CA             | TGAAG               | TAATT   | TACG     | AAAT    | GAA          | AGCT             | GTTCCACGC | CAT    | TGTACTTTAG | TAC      | CGTGC    | TGTTGAATTATG | TGGTG |        |     |         |
|                                                     | (26545)  | TTA    | CC         | GT             | TGAAG               | AG--C   | TTAA     | AAA     | GCTC         | CTT              | -----GAA  | CAATGG | --AACC     | TAGT     | --AAT    | TAGGTTTCTAT  | TC--- |        |     |         |
|                                                     |          |        |            |                |                     |         |          |         |              | Section 1356     |           |        |            |          |          |              |       |        |     |         |
| Autographa californica nucleopolyhedrovirus NC 0... | (104336) | 104336 | 104346     | 104357         | 104368              | 104379  | 104390   | 104401  | 104412       |                  |           |        |            |          |          |              |       |        |     |         |
|                                                     | (104117) | TT     | TT         | TGGACA         | ATCAAATGGG          | TACAAAT | TTTG     | TTT     | TGTT         | AACA             | ATTT      | AAT    | TCAC       | TGTTGT   | GTA      | CTTT         | TTT   | ATGATA | T   |         |
|                                                     | (26607)  | -C     | TT         | ACATGG         | AT--TTGTCT          | TCT     | ACAA     | TTTG    | CC           | TATG             | CC        | AACAG  | --GAAT     | AGGT     | TTT      | TTGT         | ATA   | TAA    | TTT | AGT--TA |
|                                                     |          |        |            |                |                     |         |          |         |              | Section 1357     |           |        |            |          |          |              |       |        |     |         |
| Autographa californica nucleopolyhedrovirus NC 0... | (104413) | 104413 | 104423     | 104434         | 104445              | 104456  | 104467   | 104478  | 104489       |                  |           |        |            |          |          |              |       |        |     |         |
|                                                     | (104194) | TG     | TT         | GAA            | TGCTTATCCTGTTGGGCC  | ACACAAT | G        | GGCACG  | TACACGGATTAT | CAATA            | TGT       | CA     | AATCGTGT   | TATATGG  |          |              |       |        |     |         |
|                                                     | (26676)  | AT     | TT         | TCC            | TCTGGCTGTTATGGCCAGT | A       | ACTTTA   | GCTTGTT | TGTGCTTGCTG  | CT--G            | TTT       | TAC    | AGAATAAA   | TTGGAT-  |          |              |       |        |     |         |
|                                                     |          |        |            |                |                     |         |          |         |              | Section 1358     |           |        |            |          |          |              |       |        |     |         |
| Autographa californica nucleopolyhedrovirus NC 0... | (104490) | 104490 | 104500     | 104511         | 104522              | 104533  | 104544   | 104555  | 104566       |                  |           |        |            |          |          |              |       |        |     |         |
|                                                     | (104271) | TT     | TATATTGTTT | GT             | TTCA                | GT      | TAT      | GAGTGT  | TACTA        | TTGT             | TA        | TGG    | -GTT       | TAGAGTG  | TTTGAAAA | C            | GAA   | CTA    | ATT | GATAA   |
|                                                     | (26750)  | ----   | CAC        | CG             | GT                  | GGA     | ATT      | TGC     | TATCGCAATGGC | TTGT             | CT        | TG     | TAG        | GC       | T-----T  | GATGTGG      | CTC   | AG     | CTA | CTT     |

## SARS-CoV-2 &amp; Autographa californica nucleopolyhedrovirus.apr

|                                                     |                                |              |               |              |            |             |        |              |         |                     |                      |                  |         |                     |        |       |            |       |      |          |            |       |        |       |   |       |       |   |     |       |
|-----------------------------------------------------|--------------------------------|--------------|---------------|--------------|------------|-------------|--------|--------------|---------|---------------------|----------------------|------------------|---------|---------------------|--------|-------|------------|-------|------|----------|------------|-------|--------|-------|---|-------|-------|---|-----|-------|
|                                                     |                                | Section 1359 |               |              |            |             |        |              |         |                     |                      |                  |         |                     |        |       |            |       |      |          |            |       |        |       |   |       |       |   |     |       |
| Autographa californica nucleopolyhedrovirus NC 0... | (104567)                       | 104567       | 104577        | 104588       | 104599     | 104610      | 104621 | 104632       | 104643  |                     |                      |                  |         |                     |        |       |            |       |      |          |            |       |        |       |   |       |       |   |     |       |
|                                                     | (104347)                       | CAGTTTGA     | TGT           | TTAACGCG     | TTT        | GTGTGC      | GCTTTG | TACATTGTGATT | GC      | AATAATGTG           | GTCTTT               | AAAAAA           | TAAT    | TTGA                |        |       |            |       |      |          |            |       |        |       |   |       |       |   |     |       |
|                                                     | SARS-CoV-2 NC_045512.2 (26812) | -----T       | TGCT          | -----TC      | TTT        | CAGACTG     | -----T | TTTGC        | GCG-TAC | GC                  | G--TTCCAT            | GTGGT            | CA      | AT---TCAATCCA       |        |       |            |       |      |          |            |       |        |       |   |       |       |   |     |       |
|                                                     |                                | Section 1360 |               |              |            |             |        |              |         |                     |                      |                  |         |                     |        |       |            |       |      |          |            |       |        |       |   |       |       |   |     |       |
| Autographa californica nucleopolyhedrovirus NC 0... | (104644)                       | 104644       | 104654        | 104665       | 104676     | 104687      | 104698 | 104709       | 104720  |                     |                      |                  |         |                     |        |       |            |       |      |          |            |       |        |       |   |       |       |   |     |       |
|                                                     | (104424)                       | CTAGTT       | ATTACGTTTCAAA | TT           | TACAAAGTAT | TCAAGT      | TGTTCC | GTTT         | TCA     | TACA                | ACG                  | ATCCG            | CGCCACC | GTTCTCT             |        |       |            |       |      |          |            |       |        |       |   |       |       |   |     |       |
|                                                     | SARS-CoV-2 NC_045512.2 (26865) | ---          | GAAA          | --CTAACATTCT | TCT        | TC----      | AACG   | TGCCAC       | TCCATG  | GCAC                | TAT                  | TCTG             | ACCA    | -GACCGTCTCTAGAAAGTG |        |       |            |       |      |          |            |       |        |       |   |       |       |   |     |       |
|                                                     |                                | Section 1361 |               |              |            |             |        |              |         |                     |                      |                  |         |                     |        |       |            |       |      |          |            |       |        |       |   |       |       |   |     |       |
| Autographa californica nucleopolyhedrovirus NC 0... | (104721)                       | 104721       | 104731        | 104742       | 104753     | 104764      | 104775 | 104786       | 104797  |                     |                      |                  |         |                     |        |       |            |       |      |          |            |       |        |       |   |       |       |   |     |       |
|                                                     | (104501)                       | AACATTGT     | AAT           | GGA          | TGACAT     | AAAAAATAAAA | AATAA  | TTTA         | AAAAA   | TG                  | TTTTTT               | AT               | TCT     | TTC                 | AC     | AA    | TTCTGT     | AAAT  | T    |          |            |       |        |       |   |       |       |   |     |       |
|                                                     | SARS-CoV-2 NC_045512.2 (26932) | AAC          | TCGTAA        | ATC          | GGA        | GCTGTG      | A      | TCCTTCGTGG   | A       | CATC                | TT                   | CGTA             | TTGC    | TG                  | GACACC | A     | -TCT       | AGG   | AC   | GC       | TGT--G     | ACATC |        |       |   |       |       |   |     |       |
|                                                     |                                | Section 1362 |               |              |            |             |        |              |         |                     |                      |                  |         |                     |        |       |            |       |      |          |            |       |        |       |   |       |       |   |     |       |
| Autographa californica nucleopolyhedrovirus NC 0... | (104798)                       | 104798       | 104808        | 104819       | 104830     | 104841      | 104852 | 104863       | 104874  |                     |                      |                  |         |                     |        |       |            |       |      |          |            |       |        |       |   |       |       |   |     |       |
|                                                     | (104578)                       | CTAA         | ACA           | --AAA        | AA         | TAT         | AAAT   | TACAAAC      | TAT     | TATGTTGTCGTCTAAATAA | ACAT                 | CAAT             | TTG     | TAA                 | AAT    | CT    | GGAC       | CA    | CTA  |          |            |       |        |       |   |       |       |   |     |       |
|                                                     | SARS-CoV-2 NC_045512.2 (27006) | AAGG         | AC            | CTGCCT       | AA         | -AG         | AAAT   | CAC          | TGT     | TGCT                | TACATCACGAACGCTTTCTT | ATTA             | CAA     | ATTG                | GG     | AG    | -CT        | TCG   | CAG  | CGT      |            |       |        |       |   |       |       |   |     |       |
|                                                     |                                | Section 1363 |               |              |            |             |        |              |         |                     |                      |                  |         |                     |        |       |            |       |      |          |            |       |        |       |   |       |       |   |     |       |
| Autographa californica nucleopolyhedrovirus NC 0... | (104875)                       | 104875       | 104885        | 104896       | 104907     | 104918      | 104929 | 104940       | 104951  |                     |                      |                  |         |                     |        |       |            |       |      |          |            |       |        |       |   |       |       |   |     |       |
|                                                     | (104653)                       | TT           | CATA          | A----        | T          | CATT        | GAT    | TTA          | TAC     | AGTCT               | ACTATACAA            | CA               | ATTAA   | ACTAACCAAATT        | AT     | CTTT  | TAC        | AAC   | AATT | AAAGC    |            |       |        |       |   |       |       |   |     |       |
|                                                     | SARS-CoV-2 NC_045512.2 (27081) | G            | TAGC          | A            | GGTGA      | CTCA        | G      | TTT          | T       | GCT                 | GC--                 | A                | TACAGT  | CG                  | TA     | CAGG  | ATTGGCAACT | ---   | AT   | AAAT     | TAA        | AAC   | --AC   | AGACC |   |       |       |   |     |       |
|                                                     |                                | Section 1364 |               |              |            |             |        |              |         |                     |                      |                  |         |                     |        |       |            |       |      |          |            |       |        |       |   |       |       |   |     |       |
| Autographa californica nucleopolyhedrovirus NC 0... | (104952)                       | 104952       | 104962        | 104973       | 104984     | 104995      | 105006 | 105017       | 105028  |                     |                      |                  |         |                     |        |       |            |       |      |          |            |       |        |       |   |       |       |   |     |       |
|                                                     | (104726)                       | AAT          | TAAA          | CAAT         | T          | TAAATA      | A      | TCTT         | CAT     | T                   | GTCG                 | T                | CGTAT   | AAG                 | TT     | TATTT | G          | ACTGT | AG   | ACGGT    | GTTACACAGC | GAT   | CC     |       |   |       |       |   |     |       |
|                                                     | SARS-CoV-2 NC_045512.2 (27151) | A            | T             | CC--         | A          | G---        | T      | AGC---       | A       | G                   | TGA                  | CAAT             | ---     | A                   | T      | G     | CT         | T     | TG   | CT       | GTACAG     | T     | AAGTGA | CA    | A | ----- | CAGAT | G | TTT | C     |
|                                                     |                                | Section 1365 |               |              |            |             |        |              |         |                     |                      |                  |         |                     |        |       |            |       |      |          |            |       |        |       |   |       |       |   |     |       |
| Autographa californica nucleopolyhedrovirus NC 0... | (105029)                       | 105029       | 105039        | 105050       | 105061     | 105072      | 105083 | 105094       | 105105  |                     |                      |                  |         |                     |        |       |            |       |      |          |            |       |        |       |   |       |       |   |     |       |
|                                                     | (104803)                       | AT           | TCGACGTT      | CG           | TG         | TT          | C      | GA           | TCA     | ACT                 | TT                   | CTCGCCAACTTGTACC | ATA     | AAAA                | AA     | TTG   | TT         | TGG   | ACA  | AAAGTTTT | C          | CAAC  | AA     |       |   |       |       |   |     |       |
|                                                     | SARS-CoV-2 NC_045512.2 (27209) | A            | T             | CTC          | ----       | G           | T      | G            | A       | -                   | CTT                  | TCA              | -GG     | TT                  | ACTAT  | ----  | AGCAGAG    | ATA   | TT   | ACT      | AA         | TT    | ATT    | AT    | G | A     | ----  | G | A   | CTTTT |

## SARS-CoV-2 &amp; Autographa californica nucleopolyhedrovirus.apr

|                                                     |          |              |            |              |            |             |                 |                |             |
|-----------------------------------------------------|----------|--------------|------------|--------------|------------|-------------|-----------------|----------------|-------------|
|                                                     |          | Section 1366 |            |              |            |             |                 |                |             |
| Autographa californica nucleopolyhedrovirus NC 0... | (105106) | 105106       | 105116     | 105127       | 105138     | 105149      | 105160          | 105171         | 105182      |
|                                                     | (104880) | TGGTAA       | CGGCCAATTC | AACGTGA      | CGATGCGCA  | CGTCCTCGGGT | ATGCATTG        | TTA            | AAAAACA     |
| SARS-CoV-2 NC_045512.2                              | (27270)  | AGTTTC       | CAT--TTGGA | ATCTGA       | ATT-ACATCA | TAAAGCTCATA | ATTAA           | AAATTTA        | TCTAA       |
|                                                     |          |              |            |              |            |             |                 |                | AGCTCGCTTTA |
|                                                     |          | Section 1367 |            |              |            |             |                 |                |             |
| Autographa californica nucleopolyhedrovirus NC 0... | (105183) | 105183       | 105193     | 105204       | 105215     | 105226      | 105237          | 105248         | 105259      |
|                                                     | (104956) | CCAAACG      | AAAGCA     | AAAGGTAC     | TAAATATG   | GC          | GCATTG          | CTGATT         | TGTTAT      |
| SARS-CoV-2 NC_045512.2                              | (27342)  | -TAAA        | -TATTCTC   | AAATTAGAT    | TGA--AGA   | GC          | AAACAAT         | GATT           | ----GAT     |
|                                                     |          |              |            |              |            |             |                 |                | TAA         |
|                                                     |          | Section 1368 |            |              |            |             |                 |                |             |
| Autographa californica nucleopolyhedrovirus NC 0... | (105260) | 105260       | 105270     | 105281       | 105292     | 105303      | 105314          | 105325         | 105336      |
|                                                     | (105033) | CGTC         | GTGGGGTGAT | AACTGGCAGGTG | TCA        | GCTTAA      | ATATCTT         | CAACGT         | TGTTG       |
| SARS-CoV-2 NC_045512.2                              | (27410)  | TCTT         | GGCACTGATA | ACACTCGCTACT | TGT        | GAGCTTT     | ATCACTAC        | CAAGAG         | TGTGT       |
|                                                     |          |              |            |              |            |             |                 |                | TAGAGGT     |
|                                                     |          | Section 1369 |            |              |            |             |                 |                |             |
| Autographa californica nucleopolyhedrovirus NC 0... | (105337) | 105337       | 105347     | 105358       | 105369     | 105380      | 105391          | 105402         | 105413      |
|                                                     | (105110) | CACGCGTTG    | TTAA       | TC           | CCACGA     | CTTTTG      | CAT             | GTA            | AAAT        |
| SARS-CoV-2 NC_045512.2                              | (27486)  | AAAGAACC     | TTGC       | TC           | ----TT     | CTGGAA      | CAT             | ACGA           | GGG         |
|                                                     |          |              |            |              |            |             |                 |                | CAAT        |
|                                                     |          | Section 1370 |            |              |            |             |                 |                |             |
| Autographa californica nucleopolyhedrovirus NC 0... | (105414) | 105414       | 105424     | 105435       | 105446     | 105457      | 105468          | 105479         | 105490      |
|                                                     | (105186) | TG           | GTAACG     | TAT          | TGCGTT     | TGCT        | CGTGGGCGCT      | TTGT           | AAC         |
| SARS-CoV-2 NC_045512.2                              | (27559)  | CT           | GACTTGC    | TT           | TAGCAC     | TCAA        | TTTGCTTTTGC     | TTGT           | CCT         |
|                                                     |          |              |            |              |            |             |                 |                | GACG        |
|                                                     |          | Section 1371 |            |              |            |             |                 |                |             |
| Autographa californica nucleopolyhedrovirus NC 0... | (105491) | 105491       | 105501     | 105512       | 105523     | 105534      | 105545          | 105556         | 105567      |
|                                                     | (105263) | GAT          | ACTCAA     | TAT          | AT         | TGCTTTT     | TACAGTTCATCTTTA | GGTTTAACT      | GTG         |
| SARS-CoV-2 NC_045512.2                              | (27636)  | AG           | TTTCACC    | TAA          | AC         | TGTTCA      | T               | CAGACA--AGAGGA | ---         |
|                                                     |          |              |            |              |            |             |                 |                | AGTTCAAG    |
|                                                     |          | Section 1372 |            |              |            |             |                 |                |             |
| Autographa californica nucleopolyhedrovirus NC 0... | (105568) | 105568       | 105578     | 105589       | 105600     | 105611      | 105622          | 105633         | 105644      |
|                                                     | (105339) | AT           | CGGCA      | TC           | AAT        | CTCCCA      | AGCA            | AAACAG         | GCCGC       |
| SARS-CoV-2 NC_045512.2                              | (27705)  | TG           | CGGCA      | AT           | AG         | TGTTTAT     | AACA            | CTTT           | GCTTCA      |
|                                                     |          |              |            |              |            |             |                 |                | ACTCAA      |

SARS-CoV-2 & Autographa californica nucleopolyhedrovirus.apr

|                                                     |          |              |                          |             |              |           |        |                           |                    |
|-----------------------------------------------------|----------|--------------|--------------------------|-------------|--------------|-----------|--------|---------------------------|--------------------|
|                                                     |          | Section 1373 |                          |             |              |           |        |                           |                    |
| Autographa californica nucleopolyhedrovirus NC 0... | (105645) | 105645       | 105655                   | 105666      | 105677       | 105688    | 105699 | 105710                    | 105721             |
|                                                     | (105416) | CGACGC       | TGTCAAACGAAATCAAATCACCTT | TA          | CTTTT        | TA        | TCGAA  | AACGTACGACGCTTGAGCGGCGCTG | TCAAACGTG          |
|                                                     | (27780)  | TTCTAT       | TGTGCTTTT-----T-----AGCC | T           | -----T       | CTGCTA    | -----T | TC                        | -----              |
|                                                     |          | Section 1374 |                          |             |              |           |        |                           |                    |
| Autographa californica nucleopolyhedrovirus NC 0... | (105722) | 105722       | 105732                   | 105743      | 105754       | 105765    | 105776 | 105787                    | 105798             |
|                                                     | (105493) | TACACA       | TAA                      | TTGTTGAGATC | TTTTTGAATTTG | ACGAT     | AA     | CTTACAA                   | CACCGTCCCTCCCA     |
|                                                     | (27814)  | -----        | TTG                      | TTT         | TAATTA       | -----T    | GC     | -----T                    | ATTATCTTTGGTTCTCAC |
|                                                     |          | Section 1375 |                          |             |              |           |        |                           |                    |
| Autographa californica nucleopolyhedrovirus NC 0... | (105799) | 105799       | 105809                   | 105820      | 105831       | 105842    | 105853 | 105864                    | 105875             |
|                                                     | (105570) | GTTGCCA      | GTGCCGGA                 | AAATAG      | TTGTCA       | TTG       | TAT    | AATTTGTT                  | TACGCCGGTCCAG      |
|                                                     | (27875)  | TGT          | CAC                      | GCCTAAACG   | AA--CA       | TGAAAT    | TTG    | TTT--TCT                  | TAG--GAATCAT       |
|                                                     |          | Section 1376 |                          |             |              |           |        |                           |                    |
| Autographa californica nucleopolyhedrovirus NC 0... | (105876) | 105876       | 105886                   | 105897      | 105908       | 105919    | 105930 | 105941                    | 105952             |
|                                                     | (105647) | CCACAAT      | TATTTTGT                 | TGGAT       | TCGACG       | CTT       | TGTT   | TCA                       | GTAACGCAT          |
|                                                     | (27945)  | CAGA         | AATG-----                | TAG         | TTT          | TAC       | AGT    | CAT                       | GTACTCA            |
|                                                     |          | Section 1377 |                          |             |              |           |        |                           |                    |
| Autographa californica nucleopolyhedrovirus NC 0... | (105953) | 105953       | 105963                   | 105974      | 105985       | 105996    | 106007 | 106018                    | 106029             |
|                                                     | (105724) | GAGT         | TCCA                     | ACTTGGC     | GCG          | TAG       | ACTGTT | GTT                       | GGTAG              |
|                                                     | (28013)  | CTTC         | TATTCTAAATG              | GTA         | TATTAGAG     | TAGGAG    | CTAG   | ---AAA                    | ATCAGCACCTTAA      |
|                                                     |          | Section 1378 |                          |             |              |           |        |                           |                    |
| Autographa californica nucleopolyhedrovirus NC 0... | (106030) | 106030       | 106040                   | 106051      | 106062       | 106073    | 106084 | 106095                    | 106106             |
|                                                     | (105801) | CATGA        | GAAATATTT                | TGC         | TAATGAC      | TTT       | TG--   | CG                        | CTTCG              |
|                                                     | (28086)  | --GCT        | GTTCTAAAT                | TCA         | CC-CATT      | CAG       | TACAT  | CGATATC                   | GGT--AA            |
|                                                     |          | Section 1379 |                          |             |              |           |        |                           |                    |
| Autographa californica nucleopolyhedrovirus NC 0... | (106107) | 106107       | 106117                   | 106128      | 106139       | 106150    | 106161 | 106172                    | 106183             |
|                                                     | (105876) | TATAG        | CGCT                     | TGTTAA      | TT           | CGTAAACCC | TGCC   | GTTT                      | CGCTTCGAGGTCGT     |
|                                                     | (28141)  | GT           | TAC                      | CTTT-----   | TACAA        | -----T    | TAAAT  | GCCAG                     | AAC-----CTAAAT     |

SARS-CoV-2 & Autographa californica nucleopolyhedrovirus.apr

|                                                     |          |              |        |        |        |        |        |        |        |   |   |   |   |   |   |   |   |   |   |   |   |   |   |   |   |   |   |   |   |   |   |   |   |   |   |   |   |   |   |   |   |   |   |   |   |   |   |   |   |   |   |   |   |   |   |   |   |   |   |   |   |   |   |   |   |   |   |   |   |   |   |   |   |   |   |   |   |   |   |   |   |   |   |   |   |   |   |   |   |   |   |   |   |   |   |   |   |   |   |   |   |   |   |   |   |   |   |   |   |   |   |   |   |   |   |   |   |   |   |   |   |   |   |   |   |   |   |   |   |   |   |   |   |   |   |   |   |   |   |   |   |   |   |   |   |   |   |   |   |   |   |   |   |   |   |   |   |   |   |   |   |   |   |   |   |   |   |   |   |   |   |   |   |   |   |   |   |   |   |   |   |   |   |   |   |   |   |   |   |   |   |   |   |   |   |   |   |   |   |   |   |   |   |   |   |   |   |   |   |   |   |   |   |   |   |   |   |   |   |   |   |   |   |   |   |   |   |   |   |   |   |   |   |   |   |   |   |   |   |   |   |   |   |   |   |   |   |   |   |   |   |   |   |   |   |   |   |   |   |   |   |   |   |   |   |   |   |   |   |   |   |   |   |   |   |   |   |   |   |   |   |   |   |   |   |   |   |   |   |   |   |   |   |   |   |   |   |   |   |   |   |   |   |   |   |   |   |   |   |   |   |   |   |   |   |   |   |   |   |   |   |   |   |   |   |   |   |   |   |   |   |   |   |   |   |   |   |   |   |   |   |   |   |   |   |   |   |   |   |   |   |   |   |   |   |   |   |   |   |   |   |   |   |   |   |   |   |   |   |   |   |   |   |   |   |   |   |   |   |   |   |   |   |   |   |   |   |   |   |   |   |   |   |   |   |   |   |   |   |   |   |   |   |   |   |   |   |   |   |   |   |   |   |   |   |   |   |   |   |   |   |   |   |   |   |   |   |   |   |   |   |   |   |   |   |   |   |   |   |   |   |   |   |   |   |   |   |   |   |   |   |   |   |   |   |   |   |   |   |   |   |   |   |   |   |   |   |   |   |   |   |   |   |   |   |   |   |   |   |   |   |   |   |   |   |   |   |   |   |   |   |   |   |   |   |   |   |   |   |   |   |   |   |   |   |   |   |   |   |   |   |   |   |   |   |   |   |   |   |   |   |   |   |   |   |   |   |   |   |   |   |   |   |   |   |   |   |   |   |   |   |   |   |   |   |   |   |   |   |   |   |   |   |   |   |   |   |   |   |   |   |   |   |   |   |   |   |   |   |   |   |   |   |   |   |   |   |   |   |   |   |   |   |   |   |   |   |   |   |   |   |   |   |   |   |   |   |   |   |   |   |   |   |   |   |   |   |   |   |   |   |   |   |   |   |   |   |   |   |   |   |   |   |   |   |   |   |   |   |   |   |   |   |   |   |   |   |   |   |   |   |   |   |   |   |   |   |   |   |   |   |   |   |   |   |   |   |   |   |   |   |   |   |   |   |   |   |
|-----------------------------------------------------|----------|--------------|--------|--------|--------|--------|--------|--------|--------|---|---|---|---|---|---|---|---|---|---|---|---|---|---|---|---|---|---|---|---|---|---|---|---|---|---|---|---|---|---|---|---|---|---|---|---|---|---|---|---|---|---|---|---|---|---|---|---|---|---|---|---|---|---|---|---|---|---|---|---|---|---|---|---|---|---|---|---|---|---|---|---|---|---|---|---|---|---|---|---|---|---|---|---|---|---|---|---|---|---|---|---|---|---|---|---|---|---|---|---|---|---|---|---|---|---|---|---|---|---|---|---|---|---|---|---|---|---|---|---|---|---|---|---|---|---|---|---|---|---|---|---|---|---|---|---|---|---|---|---|---|---|---|---|---|---|---|---|---|---|---|---|---|---|---|---|---|---|---|---|---|---|---|---|---|---|---|---|---|---|---|---|---|---|---|---|---|---|---|---|---|---|---|---|---|---|---|---|---|---|---|---|---|---|---|---|---|---|---|---|---|---|---|---|---|---|---|---|---|---|---|---|---|---|---|---|---|---|---|---|---|---|---|---|---|---|---|---|---|---|---|---|---|---|---|---|---|---|---|---|---|---|---|---|---|---|---|---|---|---|---|---|---|---|---|---|---|---|---|---|---|---|---|---|---|---|---|---|---|---|---|---|---|---|---|---|---|---|---|---|---|---|---|---|---|---|---|---|---|---|---|---|---|---|---|---|---|---|---|---|---|---|---|---|---|---|---|---|---|---|---|---|---|---|---|---|---|---|---|---|---|---|---|---|---|---|---|---|---|---|---|---|---|---|---|---|---|---|---|---|---|---|---|---|---|---|---|---|---|---|---|---|---|---|---|---|---|---|---|---|---|---|---|---|---|---|---|---|---|---|---|---|---|---|---|---|---|---|---|---|---|---|---|---|---|---|---|---|---|---|---|---|---|---|---|---|---|---|---|---|---|---|---|---|---|---|---|---|---|---|---|---|---|---|---|---|---|---|---|---|---|---|---|---|---|---|---|---|---|---|---|---|---|---|---|---|---|---|---|---|---|---|---|---|---|---|---|---|---|---|---|---|---|---|---|---|---|---|---|---|---|---|---|---|---|---|---|---|---|---|---|---|---|---|---|---|---|---|---|---|---|---|---|---|---|---|---|---|---|---|---|---|---|---|---|---|---|---|---|---|---|---|---|---|---|---|---|---|---|---|---|---|---|---|---|---|---|---|---|---|---|---|---|---|---|---|---|---|---|---|---|---|---|---|---|---|---|---|---|---|---|---|---|---|---|---|---|---|---|---|---|---|---|---|---|---|---|---|---|---|---|---|---|---|---|---|---|---|---|---|---|---|---|---|---|---|---|---|---|---|---|---|---|---|---|---|---|---|---|---|---|---|---|---|---|---|---|---|---|---|---|---|---|---|---|---|---|---|---|---|---|---|---|---|---|---|---|---|---|---|---|---|---|---|---|---|---|---|---|---|---|---|---|---|---|---|---|---|---|---|---|---|---|---|---|---|---|---|---|---|---|---|---|---|---|---|---|---|
|                                                     |          | Section 1380 |        |        |        |        |        |        |        |   |   |   |   |   |   |   |   |   |   |   |   |   |   |   |   |   |   |   |   |   |   |   |   |   |   |   |   |   |   |   |   |   |   |   |   |   |   |   |   |   |   |   |   |   |   |   |   |   |   |   |   |   |   |   |   |   |   |   |   |   |   |   |   |   |   |   |   |   |   |   |   |   |   |   |   |   |   |   |   |   |   |   |   |   |   |   |   |   |   |   |   |   |   |   |   |   |   |   |   |   |   |   |   |   |   |   |   |   |   |   |   |   |   |   |   |   |   |   |   |   |   |   |   |   |   |   |   |   |   |   |   |   |   |   |   |   |   |   |   |   |   |   |   |   |   |   |   |   |   |   |   |   |   |   |   |   |   |   |   |   |   |   |   |   |   |   |   |   |   |   |   |   |   |   |   |   |   |   |   |   |   |   |   |   |   |   |   |   |   |   |   |   |   |   |   |   |   |   |   |   |   |   |   |   |   |   |   |   |   |   |   |   |   |   |   |   |   |   |   |   |   |   |   |   |   |   |   |   |   |   |   |   |   |   |   |   |   |   |   |   |   |   |   |   |   |   |   |   |   |   |   |   |   |   |   |   |   |   |   |   |   |   |   |   |   |   |   |   |   |   |   |   |   |   |   |   |   |   |   |   |   |   |   |   |   |   |   |   |   |   |   |   |   |   |   |   |   |   |   |   |   |   |   |   |   |   |   |   |   |   |   |   |   |   |   |   |   |   |   |   |   |   |   |   |   |   |   |   |   |   |   |   |   |   |   |   |   |   |   |   |   |   |   |   |   |   |   |   |   |   |   |   |   |   |   |   |   |   |   |   |   |   |   |   |   |   |   |   |   |   |   |   |   |   |   |   |   |   |   |   |   |   |   |   |   |   |   |   |   |   |   |   |   |   |   |   |   |   |   |   |   |   |   |   |   |   |   |   |   |   |   |   |   |   |   |   |   |   |   |   |   |   |   |   |   |   |   |   |   |   |   |   |   |   |   |   |   |   |   |   |   |   |   |   |   |   |   |   |   |   |   |   |   |   |   |   |   |   |   |   |   |   |   |   |   |   |   |   |   |   |   |   |   |   |   |   |   |   |   |   |   |   |   |   |   |   |   |   |   |   |   |   |   |   |   |   |   |   |   |   |   |   |   |   |   |   |   |   |   |   |   |   |   |   |   |   |   |   |   |   |   |   |   |   |   |   |   |   |   |   |   |   |   |   |   |   |   |   |   |   |   |   |   |   |   |   |   |   |   |   |   |   |   |   |   |   |   |   |   |   |   |   |   |   |   |   |   |   |   |   |   |   |   |   |   |   |   |   |   |   |   |   |   |   |   |   |   |   |   |   |   |   |   |   |   |   |   |   |   |   |   |   |   |   |   |   |   |   |   |   |   |   |   |   |   |   |   |   |   |   |   |   |   |   |   |   |   |   |   |   |   |   |   |   |   |   |   |   |   |   |   |   |   |   |   |   |   |   |   |   |   |   |   |   |   |   |   |
| Autographa californica nucleopolyhedrovirus NC 0... | (106184) | 106184       | 106194 | 106205 | 106216 | 106227 | 106238 | 106249 | 106260 |   |   |   |   |   |   |   |   |   |   |   |   |   |   |   |   |   |   |   |   |   |   |   |   |   |   |   |   |   |   |   |   |   |   |   |   |   |   |   |   |   |   |   |   |   |   |   |   |   |   |   |   |   |   |   |   |   |   |   |   |   |   |   |   |   |   |   |   |   |   |   |   |   |   |   |   |   |   |   |   |   |   |   |   |   |   |   |   |   |   |   |   |   |   |   |   |   |   |   |   |   |   |   |   |   |   |   |   |   |   |   |   |   |   |   |   |   |   |   |   |   |   |   |   |   |   |   |   |   |   |   |   |   |   |   |   |   |   |   |   |   |   |   |   |   |   |   |   |   |   |   |   |   |   |   |   |   |   |   |   |   |   |   |   |   |   |   |   |   |   |   |   |   |   |   |   |   |   |   |   |   |   |   |   |   |   |   |   |   |   |   |   |   |   |   |   |   |   |   |   |   |   |   |   |   |   |   |   |   |   |   |   |   |   |   |   |   |   |   |   |   |   |   |   |   |   |   |   |   |   |   |   |   |   |   |   |   |   |   |   |   |   |   |   |   |   |   |   |   |   |   |   |   |   |   |   |   |   |   |   |   |   |   |   |   |   |   |   |   |   |   |   |   |   |   |   |   |   |   |   |   |   |   |   |   |   |   |   |   |   |   |   |   |   |   |   |   |   |   |   |   |   |   |   |   |   |   |   |   |   |   |   |   |   |   |   |   |   |   |   |   |   |   |   |   |   |   |   |   |   |   |   |   |   |   |   |   |   |   |   |   |   |   |   |   |   |   |   |   |   |   |   |   |   |   |   |   |   |   |   |   |   |   |   |   |   |   |   |   |   |   |   |   |   |   |   |   |   |   |   |   |   |   |   |   |   |   |   |   |   |   |   |   |   |   |   |   |   |   |   |   |   |   |   |   |   |   |   |   |   |   |   |   |   |   |   |   |   |   |   |   |   |   |   |   |   |   |   |   |   |   |   |   |   |   |   |   |   |   |   |   |   |   |   |   |   |   |   |   |   |   |   |   |   |   |   |   |   |   |   |   |   |   |   |   |   |   |   |   |   |   |   |   |   |   |   |   |   |   |   |   |   |   |   |   |   |   |   |   |   |   |   |   |   |   |   |   |   |   |   |   |   |   |   |   |   |   |   |   |   |   |   |   |   |   |   |   |   |   |   |   |   |   |   |   |   |   |   |   |   |   |   |   |   |   |   |   |   |   |   |   |   |   |   |   |   |   |   |   |   |   |   |   |   |   |   |   |   |   |   |   |   |   |   |   |   |   |   |   |   |   |   |   |   |   |   |   |   |   |   |   |   |   |   |   |   |   |   |   |   |   |   |   |   |   |   |   |   |   |   |   |   |   |   |   |   |   |   |   |   |   |   |   |   |   |   |   |   |   |   |   |   |   |   |   |   |   |   |   |   |   |   |   |   |   |   |   |   |   |   |   |   |   |   |   |   |   |   |   |   |   |   |   |   |   |   |   |   |
|                                                     | (105953) | A            | C      | A      | A      | A      | T      | G      | T      | A | T | G | T | T | T | G | G | C | G | T | C | C | G | A | T | C | C | A | A |   |   |   |   |   |   |   |   |   |   |   |   |   |   |   |   |   |   |   |   |   |   |   |   |   |   |   |   |   |   |   |   |   |   |   |   |   |   |   |   |   |   |   |   |   |   |   |   |   |   |   |   |   |   |   |   |   |   |   |   |   |   |   |   |   |   |   |   |   |   |   |   |   |   |   |   |   |   |   |   |   |   |   |   |   |   |   |   |   |   |   |   |   |   |   |   |   |   |   |   |   |   |   |   |   |   |   |   |   |   |   |   |   |   |   |   |   |   |   |   |   |   |   |   |   |   |   |   |   |   |   |   |   |   |   |   |   |   |   |   |   |   |   |   |   |   |   |   |   |   |   |   |   |   |   |   |   |   |   |   |   |   |   |   |   |   |   |   |   |   |   |   |   |   |   |   |   |   |   |   |   |   |   |   |   |   |   |   |   |   |   |   |   |   |   |   |   |   |   |   |   |   |   |   |   |   |   |   |   |   |   |   |   |   |   |   |   |   |   |   |   |   |   |   |   |   |   |   |   |   |   |   |   |   |   |   |   |   |   |   |   |   |   |   |   |   |   |   |   |   |   |   |   |   |   |   |   |   |   |   |   |   |   |   |   |   |   |   |   |   |   |   |   |   |   |   |   |   |   |   |   |   |   |   |   |   |   |   |   |   |   |   |   |   |   |   |   |   |   |   |   |   |   |   |   |   |   |   |   |   |   |   |   |   |   |   |   |   |   |   |   |   |   |   |   |   |   |   |   |   |   |   |   |   |   |   |   |   |   |   |   |   |   |   |   |   |   |   |   |   |   |   |   |   |   |   |   |   |   |   |   |   |   |   |   |   |   |   |   |   |   |   |   |   |   |   |   |   |   |   |   |   |   |   |   |   |   |   |   |   |   |   |   |   |   |   |   |   |   |   |   |   |   |   |   |   |   |   |   |   |   |   |   |   |   |   |   |   |   |   |   |   |   |   |   |   |   |   |   |   |   |   |   |   |   |   |   |   |   |   |   |   |   |   |   |   |   |   |   |   |   |   |   |   |   |   |   |   |   |   |   |   |   |   |   |   |   |   |   |   |   |   |   |   |   |   |   |   |   |   |   |   |   |   |   |   |   |   |   |   |   |   |   |   |   |   |   |   |   |   |   |   |   |   |   |   |   |   |   |   |   |   |   |   |   |   |   |   |   |   |   |   |   |   |   |   |   |   |   |   |   |   |   |   |   |   |   |   |   |   |   |   |   |   |   |   |   |   |   |   |   |   |   |   |   |   |   |   |   |   |   |   |   |   |   |   |   |   |   |   |   |   |   |   |   |   |   |   |   |   |   |   |   |   |   |   |   |   |   |   |   |   |   |   |   |   |   |   |   |   |   |   |   |   |   |   |   |   |   |   |   |   |   |   |   |   |   |   |   |   |   |   |   |   |   |   |   |   |   |   |   |   |   |   |   |   |   |   |
| SARS-CoV-2 NC_045512.2                              | (28200)  | T            | C      | -      | -      | -      | G      | -      | -      | - | T | T | C | A | T | G | A | A | G | - | A | C | T | T | T | T | A | G | A | T |   |   |   |   |   |   |   |   |   |   |   |   |   |   |   |   |   |   |   |   |   |   |   |   |   |   |   |   |   |   |   |   |   |   |   |   |   |   |   |   |   |   |   |   |   |   |   |   |   |   |   |   |   |   |   |   |   |   |   |   |   |   |   |   |   |   |   |   |   |   |   |   |   |   |   |   |   |   |   |   |   |   |   |   |   |   |   |   |   |   |   |   |   |   |   |   |   |   |   |   |   |   |   |   |   |   |   |   |   |   |   |   |   |   |   |   |   |   |   |   |   |   |   |   |   |   |   |   |   |   |   |   |   |   |   |   |   |   |   |   |   |   |   |   |   |   |   |   |   |   |   |   |   |   |   |   |   |   |   |   |   |   |   |   |   |   |   |   |   |   |   |   |   |   |   |   |   |   |   |   |   |   |   |   |   |   |   |   |   |   |   |   |   |   |   |   |   |   |   |   |   |   |   |   |   |   |   |   |   |   |   |   |   |   |   |   |   |   |   |   |   |   |   |   |   |   |   |   |   |   |   |   |   |   |   |   |   |   |   |   |   |   |   |   |   |   |   |   |   |   |   |   |   |   |   |   |   |   |   |   |   |   |   |   |   |   |   |   |   |   |   |   |   |   |   |   |   |   |   |   |   |   |   |   |   |   |   |   |   |   |   |   |   |   |   |   |   |   |   |   |   |   |   |   |   |   |   |   |   |   |   |   |   |   |   |   |   |   |   |   |   |   |   |   |   |   |   |   |   |   |   |   |   |   |   |   |   |   |   |   |   |   |   |   |   |   |   |   |   |   |   |   |   |   |   |   |   |   |   |   |   |   |   |   |   |   |   |   |   |   |   |   |   |   |   |   |   |   |   |   |   |   |   |   |   |   |   |   |   |   |   |   |   |   |   |   |   |   |   |   |   |   |   |   |   |   |   |   |   |   |   |   |   |   |   |   |   |   |   |   |   |   |   |   |   |   |   |   |   |   |   |   |   |   |   |   |   |   |   |   |   |   |   |   |   |   |   |   |   |   |   |   |   |   |   |   |   |   |   |   |   |   |   |   |   |   |   |   |   |   |   |   |   |   |   |   |   |   |   |   |   |   |   |   |   |   |   |   |   |   |   |   |   |   |   |   |   |   |   |   |   |   |   |   |   |   |   |   |   |   |   |   |   |   |   |   |   |   |   |   |   |   |   |   |   |   |   |   |   |   |   |   |   |   |   |   |   |   |   |   |   |   |   |   |   |   |   |   |   |   |   |   |   |   |   |   |   |   |   |   |   |   |   |   |   |   |   |   |   |   |   |   |   |   |   |   |   |   |   |   |   |   |   |   |   |   |   |   |   |   |   |   |   |   |   |   |   |   |   |   |   |   |   |   |   |   |   |   |   |   |   |   |   |   |   |   |   |   |   |   |   |   |   |   |   |   |   |   |   |   |   |   |   |   |   |   |   |
|                                                     |          | Section 1381 |        |        |        |        |        |        |        |   |   |   |   |   |   |   |   |   |   |   |   |   |   |   |   |   |   |   |   |   |   |   |   |   |   |   |   |   |   |   |   |   |   |   |   |   |   |   |   |   |   |   |   |   |   |   |   |   |   |   |   |   |   |   |   |   |   |   |   |   |   |   |   |   |   |   |   |   |   |   |   |   |   |   |   |   |   |   |   |   |   |   |   |   |   |   |   |   |   |   |   |   |   |   |   |   |   |   |   |   |   |   |   |   |   |   |   |   |   |   |   |   |   |   |   |   |   |   |   |   |   |   |   |   |   |   |   |   |   |   |   |   |   |   |   |   |   |   |   |   |   |   |   |   |   |   |   |   |   |   |   |   |   |   |   |   |   |   |   |   |   |   |   |   |   |   |   |   |   |   |   |   |   |   |   |   |   |   |   |   |   |   |   |   |   |   |   |   |   |   |   |   |   |   |   |   |   |   |   |   |   |   |   |   |   |   |   |   |   |   |   |   |   |   |   |   |   |   |   |   |   |   |   |   |   |   |   |   |   |   |   |   |   |   |   |   |   |   |   |   |   |   |   |   |   |   |   |   |   |   |   |   |   |   |   |   |   |   |   |   |   |   |   |   |   |   |   |   |   |   |   |   |   |   |   |   |   |   |   |   |   |   |   |   |   |   |   |   |   |   |   |   |   |   |   |   |   |   |   |   |   |   |   |   |   |   |   |   |   |   |   |   |   |   |   |   |   |   |   |   |   |   |   |   |   |   |   |   |   |   |   |   |   |   |   |   |   |   |   |   |   |   |   |   |   |   |   |   |   |   |   |   |   |   |   |   |   |   |   |   |   |   |   |   |   |   |   |   |   |   |   |   |   |   |   |   |   |   |   |   |   |   |   |   |   |   |   |   |   |   |   |   |   |   |   |   |   |   |   |   |   |   |   |   |   |   |   |   |   |   |   |   |   |   |   |   |   |   |   |   |   |   |   |   |   |   |   |   |   |   |   |   |   |   |   |   |   |   |   |   |   |   |   |   |   |   |   |   |   |   |   |   |   |   |   |   |   |   |   |   |   |   |   |   |   |   |   |   |   |   |   |   |   |   |   |   |   |   |   |   |   |   |   |   |   |   |   |   |   |   |   |   |   |   |   |   |   |   |   |   |   |   |   |   |   |   |   |   |   |   |   |   |   |   |   |   |   |   |   |   |   |   |   |   |   |   |   |   |   |   |   |   |   |   |   |   |   |   |   |   |   |   |   |   |   |   |   |   |   |   |   |   |   |   |   |   |   |   |   |   |   |   |   |   |   |   |   |   |   |   |   |   |   |   |   |   |   |   |   |   |   |   |   |   |   |   |   |   |   |   |   |   |   |   |   |   |   |   |   |   |   |   |   |   |   |   |   |   |   |   |   |   |   |   |   |   |   |   |   |   |   |   |   |   |   |   |   |   |   |   |   |   |   |   |   |   |   |   |   |   |   |   |   |   |   |   |   |   |   |   |   |   |   |   |   |   |   |
| Autographa californica nucleopolyhedrovirus NC 0... | (106261) | 106261       | 106271 | 106282 | 106293 | 106304 | 106315 | 106326 | 106337 |   |   |   |   |   |   |   |   |   |   |   |   |   |   |   |   |   |   |   |   |   |   |   |   |   |   |   |   |   |   |   |   |   |   |   |   |   |   |   |   |   |   |   |   |   |   |   |   |   |   |   |   |   |   |   |   |   |   |   |   |   |   |   |   |   |   |   |   |   |   |   |   |   |   |   |   |   |   |   |   |   |   |   |   |   |   |   |   |   |   |   |   |   |   |   |   |   |   |   |   |   |   |   |   |   |   |   |   |   |   |   |   |   |   |   |   |   |   |   |   |   |   |   |   |   |   |   |   |   |   |   |   |   |   |   |   |   |   |   |   |   |   |   |   |   |   |   |   |   |   |   |   |   |   |   |   |   |   |   |   |   |   |   |   |   |   |   |   |   |   |   |   |   |   |   |   |   |   |   |   |   |   |   |   |   |   |   |   |   |   |   |   |   |   |   |   |   |   |   |   |   |   |   |   |   |   |   |   |   |   |   |   |   |   |   |   |   |   |   |   |   |   |   |   |   |   |   |   |   |   |   |   |   |   |   |   |   |   |   |   |   |   |   |   |   |   |   |   |   |   |   |   |   |   |   |   |   |   |   |   |   |   |   |   |   |   |   |   |   |   |   |   |   |   |   |   |   |   |   |   |   |   |   |   |   |   |   |   |   |   |   |   |   |   |   |   |   |   |   |   |   |   |   |   |   |   |   |   |   |   |   |   |   |   |   |   |   |   |   |   |   |   |   |   |   |   |   |   |   |   |   |   |   |   |   |   |   |   |   |   |   |   |   |   |   |   |   |   |   |   |   |   |   |   |   |   |   |   |   |   |   |   |   |   |   |   |   |   |   |   |   |   |   |   |   |   |   |   |   |   |   |   |   |   |   |   |   |   |   |   |   |   |   |   |   |   |   |   |   |   |   |   |   |   |   |   |   |   |   |   |   |   |   |   |   |   |   |   |   |   |   |   |   |   |   |   |   |   |   |   |   |   |   |   |   |   |   |   |   |   |   |   |   |   |   |   |   |   |   |   |   |   |   |   |   |   |   |   |   |   |   |   |   |   |   |   |   |   |   |   |   |   |   |   |   |   |   |   |   |   |   |   |   |   |   |   |   |   |   |   |   |   |   |   |   |   |   |   |   |   |   |   |   |   |   |   |   |   |   |   |   |   |   |   |   |   |   |   |   |   |   |   |   |   |   |   |   |   |   |   |   |   |   |   |   |   |   |   |   |   |   |   |   |   |   |   |   |   |   |   |   |   |   |   |   |   |   |   |   |   |   |   |   |   |   |   |   |   |   |   |   |   |   |   |   |   |   |   |   |   |   |   |   |   |   |   |   |   |   |   |   |   |   |   |   |   |   |   |   |   |   |   |   |   |   |   |   |   |   |   |   |   |   |   |   |   |   |   |   |   |   |   |   |   |   |   |   |   |   |   |   |   |   |   |   |   |   |   |   |   |   |   |   |   |   |   |   |   |   |   |   |   |   |   |   |   |   |   |
|                                                     | (106030) | T            | C      | G      | A      | T      | G      | T      | C      | A | A | T | T | C | C | A | C | T | T | G | C | A | G | A | A | T | T | C | T | T | T | T | T | T | C |   |   |   |   |   |   |   |   |   |   |   |   |   |   |   |   |   |   |   |   |   |   |   |   |   |   |   |   |   |   |   |   |   |   |   |   |   |   |   |   |   |   |   |   |   |   |   |   |   |   |   |   |   |   |   |   |   |   |   |   |   |   |   |   |   |   |   |   |   |   |   |   |   |   |   |   |   |   |   |   |   |   |   |   |   |   |   |   |   |   |   |   |   |   |   |   |   |   |   |   |   |   |   |   |   |   |   |   |   |   |   |   |   |   |   |   |   |   |   |   |   |   |   |   |   |   |   |   |   |   |   |   |   |   |   |   |   |   |   |   |   |   |   |   |   |   |   |   |   |   |   |   |   |   |   |   |   |   |   |   |   |   |   |   |   |   |   |   |   |   |   |   |   |   |   |   |   |   |   |   |   |   |   |   |   |   |   |   |   |   |   |   |   |   |   |   |   |   |   |   |   |   |   |   |   |   |   |   |   |   |   |   |   |   |   |   |   |   |   |   |   |   |   |   |   |   |   |   |   |   |   |   |   |   |   |   |   |   |   |   |   |   |   |   |   |   |   |   |   |   |   |   |   |   |   |   |   |   |   |   |   |   |   |   |   |   |   |   |   |   |   |   |   |   |   |   |   |   |   |   |   |   |   |   |   |   |   |   |   |   |   |   |   |   |   |   |   |   |   |   |   |   |   |   |   |   |   |   |   |   |   |   |   |   |   |   |   |   |   |   |   |   |   |   |   |   |   |   |   |   |   |   |   |   |   |   |   |   |   |   |   |   |   |   |   |   |   |   |   |   |   |   |   |   |   |   |   |   |   |   |   |   |   |   |   |   |   |   |   |   |   |   |   |   |   |   |   |   |   |   |   |   |   |   |   |   |   |   |   |   |   |   |   |   |   |   |   |   |   |   |   |   |   |   |   |   |   |   |   |   |   |   |   |   |   |   |   |   |   |   |   |   |   |   |   |   |   |   |   |   |   |   |   |   |   |   |   |   |   |   |   |   |   |   |   |   |   |   |   |   |   |   |   |   |   |   |   |   |   |   |   |   |   |   |   |   |   |   |   |   |   |   |   |   |   |   |   |   |   |   |   |   |   |   |   |   |   |   |   |   |   |   |   |   |   |   |   |   |   |   |   |   |   |   |   |   |   |   |   |   |   |   |   |   |   |   |   |   |   |   |   |   |   |   |   |   |   |   |   |   |   |   |   |   |   |   |   |   |   |   |   |   |   |   |   |   |   |   |   |   |   |   |   |   |   |   |   |   |   |   |   |   |   |   |   |   |   |   |   |   |   |   |   |   |   |   |   |   |   |   |   |   |   |   |   |   |   |   |   |   |   |   |   |   |   |   |   |   |   |   |   |   |   |   |   |   |   |   |   |   |   |   |   |   |   |   |   |   |   |   |   |   |   |   |   |   |   |   |   |   |   |   |
| SARS-CoV-2 NC_045512.2                              | (28266)  | A            | A      | A      | C      | T      | A      | A      | A      | T | G | C | A | A | A | T | C | A | G | A | A | T | G | C | A | A | T | G | C | A | A | T | G | C | A | T | C | A |   |   |   |   |   |   |   |   |   |   |   |   |   |   |   |   |   |   |   |   |   |   |   |   |   |   |   |   |   |   |   |   |   |   |   |   |   |   |   |   |   |   |   |   |   |   |   |   |   |   |   |   |   |   |   |   |   |   |   |   |   |   |   |   |   |   |   |   |   |   |   |   |   |   |   |   |   |   |   |   |   |   |   |   |   |   |   |   |   |   |   |   |   |   |   |   |   |   |   |   |   |   |   |   |   |   |   |   |   |   |   |   |   |   |   |   |   |   |   |   |   |   |   |   |   |   |   |   |   |   |   |   |   |   |   |   |   |   |   |   |   |   |   |   |   |   |   |   |   |   |   |   |   |   |   |   |   |   |   |   |   |   |   |   |   |   |   |   |   |   |   |   |   |   |   |   |   |   |   |   |   |   |   |   |   |   |   |   |   |   |   |   |   |   |   |   |   |   |   |   |   |   |   |   |   |   |   |   |   |   |   |   |   |   |   |   |   |   |   |   |   |   |   |   |   |   |   |   |   |   |   |   |   |   |   |   |   |   |   |   |   |   |   |   |   |   |   |   |   |   |   |   |   |   |   |   |   |   |   |   |   |   |   |   |   |   |   |   |   |   |   |   |   |   |   |   |   |   |   |   |   |   |   |   |   |   |   |   |   |   |   |   |   |   |   |   |   |   |   |   |   |   |   |   |   |   |   |   |   |   |   |   |   |   |   |   |   |   |   |   |   |   |   |   |   |   |   |   |   |   |   |   |   |   |   |   |   |   |   |   |   |   |   |   |   |   |   |   |   |   |   |   |   |   |   |   |   |   |   |   |   |   |   |   |   |   |   |   |   |   |   |   |   |   |   |   |   |   |   |   |   |   |   |   |   |   |   |   |   |   |   |   |   |   |   |   |   |   |   |   |   |   |   |   |   |   |   |   |   |   |   |   |   |   |   |   |   |   |   |   |   |   |   |   |   |   |   |   |   |   |   |   |   |   |   |   |   |   |   |   |   |   |   |   |   |   |   |   |   |   |   |   |   |   |   |   |   |   |   |   |   |   |   |   |   |   |   |   |   |   |   |   |   |   |   |   |   |   |   |   |   |   |   |   |   |   |   |   |   |   |   |   |   |   |   |   |   |   |   |   |   |   |   |   |   |   |   |   |   |   |   |   |   |   |   |   |   |   |   |   |   |   |   |   |   |   |   |   |   |   |   |   |   |   |   |   |   |   |   |   |   |   |   |   |   |   |   |   |   |   |   |   |   |   |   |   |   |   |   |   |   |   |   |   |   |   |   |   |   |   |   |   |   |   |   |   |   |   |   |   |   |   |   |   |   |   |   |   |   |   |   |   |   |   |   |   |   |   |   |   |   |   |   |   |   |   |   |   |   |   |   |   |   |   |   |   |   |   |   |   |   |   |   |   |   |   |   |   |   |
|                                                     |          | Section 1382 |        |        |        |        |        |        |        |   |   |   |   |   |   |   |   |   |   |   |   |   |   |   |   |   |   |   |   |   |   |   |   |   |   |   |   |   |   |   |   |   |   |   |   |   |   |   |   |   |   |   |   |   |   |   |   |   |   |   |   |   |   |   |   |   |   |   |   |   |   |   |   |   |   |   |   |   |   |   |   |   |   |   |   |   |   |   |   |   |   |   |   |   |   |   |   |   |   |   |   |   |   |   |   |   |   |   |   |   |   |   |   |   |   |   |   |   |   |   |   |   |   |   |   |   |   |   |   |   |   |   |   |   |   |   |   |   |   |   |   |   |   |   |   |   |   |   |   |   |   |   |   |   |   |   |   |   |   |   |   |   |   |   |   |   |   |   |   |   |   |   |   |   |   |   |   |   |   |   |   |   |   |   |   |   |   |   |   |   |   |   |   |   |   |   |   |   |   |   |   |   |   |   |   |   |   |   |   |   |   |   |   |   |   |   |   |   |   |   |   |   |   |   |   |   |   |   |   |   |   |   |   |   |   |   |   |   |   |   |   |   |   |   |   |   |   |   |   |   |   |   |   |   |   |   |   |   |   |   |   |   |   |   |   |   |   |   |   |   |   |   |   |   |   |   |   |   |   |   |   |   |   |   |   |   |   |   |   |   |   |   |   |   |   |   |   |   |   |   |   |   |   |   |   |   |   |   |   |   |   |   |   |   |   |   |   |   |   |   |   |   |   |   |   |   |   |   |   |   |   |   |   |   |   |   |   |   |   |   |   |   |   |   |   |   |   |   |   |   |   |   |   |   |   |   |   |   |   |   |   |   |   |   |   |   |   |   |   |   |   |   |   |   |   |   |   |   |   |   |   |   |   |   |   |   |   |   |   |   |   |   |   |   |   |   |   |   |   |   |   |   |   |   |   |   |   |   |   |   |   |   |   |   |   |   |   |   |   |   |   |   |   |   |   |   |   |   |   |   |   |   |   |   |   |   |   |   |   |   |   |   |   |   |   |   |   |   |   |   |   |   |   |   |   |   |   |   |   |   |   |   |   |   |   |   |   |   |   |   |   |   |   |   |   |   |   |   |   |   |   |   |   |   |   |   |   |   |   |   |   |   |   |   |   |   |   |   |   |   |   |   |   |   |   |   |   |   |   |   |   |   |   |   |   |   |   |   |   |   |   |   |   |   |   |   |   |   |   |   |   |   |   |   |   |   |   |   |   |   |   |   |   |   |   |   |   |   |   |   |   |   |   |   |   |   |   |   |   |   |   |   |   |   |   |   |   |   |   |   |   |   |   |   |   |   |   |   |   |   |   |   |   |   |   |   |   |   |   |   |   |   |   |   |   |   |   |   |   |   |   |   |   |   |   |   |   |   |   |   |   |   |   |   |   |   |   |   |   |   |   |   |   |   |   |   |   |   |   |   |   |   |   |   |   |   |   |   |   |   |   |   |   |   |   |   |   |   |   |   |   |   |   |   |   |   |   |   |   |   |   |   |   |   |   |   |   |
| Autographa californica nucleopolyhedrovirus NC 0... | (106338) | 106338       | 106348 | 106359 | 106370 | 106381 | 106392 | 106403 | 106414 |   |   |   |   |   |   |   |   |   |   |   |   |   |   |   |   |   |   |   |   |   |   |   |   |   |   |   |   |   |   |   |   |   |   |   |   |   |   |   |   |   |   |   |   |   |   |   |   |   |   |   |   |   |   |   |   |   |   |   |   |   |   |   |   |   |   |   |   |   |   |   |   |   |   |   |   |   |   |   |   |   |   |   |   |   |   |   |   |   |   |   |   |   |   |   |   |   |   |   |   |   |   |   |   |   |   |   |   |   |   |   |   |   |   |   |   |   |   |   |   |   |   |   |   |   |   |   |   |   |   |   |   |   |   |   |   |   |   |   |   |   |   |   |   |   |   |   |   |   |   |   |   |   |   |   |   |   |   |   |   |   |   |   |   |   |   |   |   |   |   |   |   |   |   |   |   |   |   |   |   |   |   |   |   |   |   |   |   |   |   |   |   |   |   |   |   |   |   |   |   |   |   |   |   |   |   |   |   |   |   |   |   |   |   |   |   |   |   |   |   |   |   |   |   |   |   |   |   |   |   |   |   |   |   |   |   |   |   |   |   |   |   |   |   |   |   |   |   |   |   |   |   |   |   |   |   |   |   |   |   |   |   |   |   |   |   |   |   |   |   |   |   |   |   |   |   |   |   |   |   |   |   |   |   |   |   |   |   |   |   |   |   |   |   |   |   |   |   |   |   |   |   |   |   |   |   |   |   |   |   |   |   |   |   |   |   |   |   |   |   |   |   |   |   |   |   |   |   |   |   |   |   |   |   |   |   |   |   |   |   |   |   |   |   |   |   |   |   |   |   |   |   |   |   |   |   |   |   |   |   |   |   |   |   |   |   |   |   |   |   |   |   |   |   |   |   |   |   |   |   |   |   |   |   |   |   |   |   |   |   |   |   |   |   |   |   |   |   |   |   |   |   |   |   |   |   |   |   |   |   |   |   |   |   |   |   |   |   |   |   |   |   |   |   |   |   |   |   |   |   |   |   |   |   |   |   |   |   |   |   |   |   |   |   |   |   |   |   |   |   |   |   |   |   |   |   |   |   |   |   |   |   |   |   |   |   |   |   |   |   |   |   |   |   |   |   |   |   |   |   |   |   |   |   |   |   |   |   |   |   |   |   |   |   |   |   |   |   |   |   |   |   |   |   |   |   |   |   |   |   |   |   |   |   |   |   |   |   |   |   |   |   |   |   |   |   |   |   |   |   |   |   |   |   |   |   |   |   |   |   |   |   |   |   |   |   |   |   |   |   |   |   |   |   |   |   |   |   |   |   |   |   |   |   |   |   |   |   |   |   |   |   |   |   |   |   |   |   |   |   |   |   |   |   |   |   |   |   |   |   |   |   |   |   |   |   |   |   |   |   |   |   |   |   |   |   |   |   |   |   |   |   |   |   |   |   |   |   |   |   |   |   |   |   |   |   |   |   |   |   |   |   |   |   |   |   |   |   |   |   |   |   |   |   |   |   |   |   |   |   |   |   |   |   |   |   |   |   |
|                                                     | (106107) | A            | A      | C      | A      | T      | C      | G      | T      | G | C | A | T | A | A | A | T | A | A | A | A | T | T | T | T | A | A | T | G | G | G | T | T | T | T | T | T |   |   |   |   |   |   |   |   |   |   |   |   |   |   |   |   |   |   |   |   |   |   |   |   |   |   |   |   |   |   |   |   |   |   |   |   |   |   |   |   |   |   |   |   |   |   |   |   |   |   |   |   |   |   |   |   |   |   |   |   |   |   |   |   |   |   |   |   |   |   |   |   |   |   |   |   |   |   |   |   |   |   |   |   |   |   |   |   |   |   |   |   |   |   |   |   |   |   |   |   |   |   |   |   |   |   |   |   |   |   |   |   |   |   |   |   |   |   |   |   |   |   |   |   |   |   |   |   |   |   |   |   |   |   |   |   |   |   |   |   |   |   |   |   |   |   |   |   |   |   |   |   |   |   |   |   |   |   |   |   |   |   |   |   |   |   |   |   |   |   |   |   |   |   |   |   |   |   |   |   |   |   |   |   |   |   |   |   |   |   |   |   |   |   |   |   |   |   |   |   |   |   |   |   |   |   |   |   |   |   |   |   |   |   |   |   |   |   |   |   |   |   |   |   |   |   |   |   |   |   |   |   |   |   |   |   |   |   |   |   |   |   |   |   |   |   |   |   |   |   |   |   |   |   |   |   |   |   |   |   |   |   |   |   |   |   |   |   |   |   |   |   |   |   |   |   |   |   |   |   |   |   |   |   |   |   |   |   |   |   |   |   |   |   |   |   |   |   |   |   |   |   |   |   |   |   |   |   |   |   |   |   |   |   |   |   |   |   |   |   |   |   |   |   |   |   |   |   |   |   |   |   |   |   |   |   |   |   |   |   |   |   |   |   |   |   |   |   |   |   |   |   |   |   |   |   |   |   |   |   |   |   |   |   |   |   |   |   |   |   |   |   |   |   |   |   |   |   |   |   |   |   |   |   |   |   |   |   |   |   |   |   |   |   |   |   |   |   |   |   |   |   |   |   |   |   |   |   |   |   |   |   |   |   |   |   |   |   |   |   |   |   |   |   |   |   |   |   |   |   |   |   |   |   |   |   |   |   |   |   |   |   |   |   |   |   |   |   |   |   |   |   |   |   |   |   |   |   |   |   |   |   |   |   |   |   |   |   |   |   |   |   |   |   |   |   |   |   |   |   |   |   |   |   |   |   |   |   |   |   |   |   |   |   |   |   |   |   |   |   |   |   |   |   |   |   |   |   |   |   |   |   |   |   |   |   |   |   |   |   |   |   |   |   |   |   |   |   |   |   |   |   |   |   |   |   |   |   |   |   |   |   |   |   |   |   |   |   |   |   |   |   |   |   |   |   |   |   |   |   |   |   |   |   |   |   |   |   |   |   |   |   |   |   |   |   |   |   |   |   |   |   |   |   |   |   |   |   |   |   |   |   |   |   |   |   |   |   |   |   |   |   |   |   |   |   |   |   |   |   |   |   |   |   |   |   |   |   |   |   |   |   |   |   |   |   |   |   |   |   |
| SARS-CoV-2 NC_045512.2                              | (28339)  | T            | T      | C      | A      | A      | C      | -      | T      | G | - | - | G | C | A | - | - | - | G | T | A | A | C | C | A | G | A | - | - | - | - | A | T | G | A | G | A | T | C | G |   |   |   |   |   |   |   |   |   |   |   |   |   |   |   |   |   |   |   |   |   |   |   |   |   |   |   |   |   |   |   |   |   |   |   |   |   |   |   |   |   |   |   |   |   |   |   |   |   |   |   |   |   |   |   |   |   |   |   |   |   |   |   |   |   |   |   |   |   |   |   |   |   |   |   |   |   |   |   |   |   |   |   |   |   |   |   |   |   |   |   |   |   |   |   |   |   |   |   |   |   |   |   |   |   |   |   |   |   |   |   |   |   |   |   |   |   |   |   |   |   |   |   |   |   |   |   |   |   |   |   |   |   |   |   |   |   |   |   |   |   |   |   |   |   |   |   |   |   |   |   |   |   |   |   |   |   |   |   |   |   |   |   |   |   |   |   |   |   |   |   |   |   |   |   |   |   |   |   |   |   |   |   |   |   |   |   |   |   |   |   |   |   |   |   |   |   |   |   |   |   |   |   |   |   |   |   |   |   |   |   |   |   |   |   |   |   |   |   |   |   |   |   |   |   |   |   |   |   |   |   |   |   |   |   |   |   |   |   |   |   |   |   |   |   |   |   |   |   |   |   |   |   |   |   |   |   |   |   |   |   |   |   |   |   |   |   |   |   |   |   |   |   |   |   |   |   |   |   |   |   |   |   |   |   |   |   |   |   |   |   |   |   |   |   |   |   |   |   |   |   |   |   |   |   |   |   |   |   |   |   |   |   |   |   |   |   |   |   |   |   |   |   |   |   |   |   |   |   |   |   |   |   |   |   |   |   |   |   |   |   |   |   |   |   |   |   |   |   |   |   |   |   |   |   |   |   |   |   |   |   |   |   |   |   |   |   |   |   |   |   |   |   |   |   |   |   |   |   |   |   |   |   |   |   |   |   |   |   |   |   |   |   |   |   |   |   |   |   |   |   |   |   |   |   |   |   |   |   |   |   |   |   |   |   |   |   |   |   |   |   |   |   |   |   |   |   |   |   |   |   |   |   |   |   |   |   |   |   |   |   |   |   |   |   |   |   |   |   |   |   |   |   |   |   |   |   |   |   |   |   |   |   |   |   |   |   |   |   |   |   |   |   |   |   |   |   |   |   |   |   |   |   |   |   |   |   |   |   |   |   |   |   |   |   |   |   |   |   |   |   |   |   |   |   |   |   |   |   |   |   |   |   |   |   |   |   |   |   |   |   |   |   |   |   |   |   |   |   |   |   |   |   |   |   |   |   |   |   |   |   |   |   |   |   |   |   |   |   |   |   |   |   |   |   |   |   |   |   |   |   |   |   |   |   |   |   |   |   |   |   |   |   |   |   |   |   |   |   |   |   |   |   |   |   |   |   |   |   |   |   |   |   |   |   |   |   |   |   |   |   |   |   |   |   |   |   |   |   |   |   |   |   |   |   |   |   |   |   |   |   |   |   |   |   |   |   |
|                                                     |          | Section 1383 |        |        |        |        |        |        |        |   |   |   |   |   |   |   |   |   |   |   |   |   |   |   |   |   |   |   |   |   |   |   |   |   |   |   |   |   |   |   |   |   |   |   |   |   |   |   |   |   |   |   |   |   |   |   |   |   |   |   |   |   |   |   |   |   |   |   |   |   |   |   |   |   |   |   |   |   |   |   |   |   |   |   |   |   |   |   |   |   |   |   |   |   |   |   |   |   |   |   |   |   |   |   |   |   |   |   |   |   |   |   |   |   |   |   |   |   |   |   |   |   |   |   |   |   |   |   |   |   |   |   |   |   |   |   |   |   |   |   |   |   |   |   |   |   |   |   |   |   |   |   |   |   |   |   |   |   |   |   |   |   |   |   |   |   |   |   |   |   |   |   |   |   |   |   |   |   |   |   |   |   |   |   |   |   |   |   |   |   |   |   |   |   |   |   |   |   |   |   |   |   |   |   |   |   |   |   |   |   |   |   |   |   |   |   |   |   |   |   |   |   |   |   |   |   |   |   |   |   |   |   |   |   |   |   |   |   |   |   |   |   |   |   |   |   |   |   |   |   |   |   |   |   |   |   |   |   |   |   |   |   |   |   |   |   |   |   |   |   |   |   |   |   |   |   |   |   |   |   |   |   |   |   |   |   |   |   |   |   |   |   |   |   |   |   |   |   |   |   |   |   |   |   |   |   |   |   |   |   |   |   |   |   |   |   |   |   |   |   |   |   |   |   |   |   |   |   |   |   |   |   |   |   |   |   |   |   |   |   |   |   |   |   |   |   |   |   |   |   |   |   |   |   |   |   |   |   |   |   |   |   |   |   |   |   |   |   |   |   |   |   |   |   |   |   |   |   |   |   |   |   |   |   |   |   |   |   |   |   |   |   |   |   |   |   |   |   |   |   |   |   |   |   |   |   |   |   |   |   |   |   |   |   |   |   |   |   |   |   |   |   |   |   |   |   |   |   |   |   |   |   |   |   |   |   |   |   |   |   |   |   |   |   |   |   |   |   |   |   |   |   |   |   |   |   |   |   |   |   |   |   |   |   |   |   |   |   |   |   |   |   |   |   |   |   |   |   |   |   |   |   |   |   |   |   |   |   |   |   |   |   |   |   |   |   |   |   |   |   |   |   |   |   |   |   |   |   |   |   |   |   |   |   |   |   |   |   |   |   |   |   |   |   |   |   |   |   |   |   |   |   |   |   |   |   |   |   |   |   |   |   |   |   |   |   |   |   |   |   |   |   |   |   |   |   |   |   |   |   |   |   |   |   |   |   |   |   |   |   |   |   |   |   |   |   |   |   |   |   |   |   |   |   |   |   |   |   |   |   |   |   |   |   |   |   |   |   |   |   |   |   |   |   |   |   |   |   |   |   |   |   |   |   |   |   |   |   |   |   |   |   |   |   |   |   |   |   |   |   |   |   |   |   |   |   |   |   |   |   |   |   |   |   |   |   |   |   |   |   |   |   |   |   |   |   |   |   |   |   |   |   |   |   |   |   |   |
| Autographa californica nucleopolyhedrovirus NC 0... | (106415) | 106415       | 106425 | 106436 | 106447 | 106458 | 106469 | 106480 | 106491 |   |   |   |   |   |   |   |   |   |   |   |   |   |   |   |   |   |   |   |   |   |   |   |   |   |   |   |   |   |   |   |   |   |   |   |   |   |   |   |   |   |   |   |   |   |   |   |   |   |   |   |   |   |   |   |   |   |   |   |   |   |   |   |   |   |   |   |   |   |   |   |   |   |   |   |   |   |   |   |   |   |   |   |   |   |   |   |   |   |   |   |   |   |   |   |   |   |   |   |   |   |   |   |   |   |   |   |   |   |   |   |   |   |   |   |   |   |   |   |   |   |   |   |   |   |   |   |   |   |   |   |   |   |   |   |   |   |   |   |   |   |   |   |   |   |   |   |   |   |   |   |   |   |   |   |   |   |   |   |   |   |   |   |   |   |   |   |   |   |   |   |   |   |   |   |   |   |   |   |   |   |   |   |   |   |   |   |   |   |   |   |   |   |   |   |   |   |   |   |   |   |   |   |   |   |   |   |   |   |   |   |   |   |   |   |   |   |   |   |   |   |   |   |   |   |   |   |   |   |   |   |   |   |   |   |   |   |   |   |   |   |   |   |   |   |   |   |   |   |   |   |   |   |   |   |   |   |   |   |   |   |   |   |   |   |   |   |   |   |   |   |   |   |   |   |   |   |   |   |   |   |   |   |   |   |   |   |   |   |   |   |   |   |   |   |   |   |   |   |   |   |   |   |   |   |   |   |   |   |   |   |   |   |   |   |   |   |   |   |   |   |   |   |   |   |   |   |   |   |   |   |   |   |   |   |   |   |   |   |   |   |   |   |   |   |   |   |   |   |   |   |   |   |   |   |   |   |   |   |   |   |   |   |   |   |   |   |   |   |   |   |   |   |   |   |   |   |   |   |   |   |   |   |   |   |   |   |   |   |   |   |   |   |   |   |   |   |   |   |   |   |   |   |   |   |   |   |   |   |   |   |   |   |   |   |   |   |   |   |   |   |   |   |   |   |   |   |   |   |   |   |   |   |   |   |   |   |   |   |   |   |   |   |   |   |   |   |   |   |   |   |   |   |   |   |   |   |   |   |   |   |   |   |   |   |   |   |   |   |   |   |   |   |   |   |   |   |   |   |   |   |   |   |   |   |   |   |   |   |   |   |   |   |   |   |   |   |   |   |   |   |   |   |   |   |   |   |   |   |   |   |   |   |   |   |   |   |   |   |   |   |   |   |   |   |   |   |   |   |   |   |   |   |   |   |   |   |   |   |   |   |   |   |   |   |   |   |   |   |   |   |   |   |   |   |   |   |   |   |   |   |   |   |   |   |   |   |   |   |   |   |   |   |   |   |   |   |   |   |   |   |   |   |   |   |   |   |   |   |   |   |   |   |   |   |   |   |   |   |   |   |   |   |   |   |   |   |   |   |   |   |   |   |   |   |   |   |   |   |   |   |   |   |   |   |   |   |   |   |   |   |   |   |   |   |   |   |   |   |   |   |   |   |   |   |   |   |   |   |   |   |   |   |   |   |   |   |   |
|                                                     | (106183) | G            | C      | T      | A      | A      | T      | T      | T      | T | G | C | C | G | C | C | A | T | C | A | A | A | T | T | G | C | T | T | T | T | G | G | G | T | T | T | T | T | T |   |   |   |   |   |   |   |   |   |   |   |   |   |   |   |   |   |   |   |   |   |   |   |   |   |   |   |   |   |   |   |   |   |   |   |   |   |   |   |   |   |   |   |   |   |   |   |   |   |   |   |   |   |   |   |   |   |   |   |   |   |   |   |   |   |   |   |   |   |   |   |   |   |   |   |   |   |   |   |   |   |   |   |   |   |   |   |   |   |   |   |   |   |   |   |   |   |   |   |   |   |   |   |   |   |   |   |   |   |   |   |   |   |   |   |   |   |   |   |   |   |   |   |   |   |   |   |   |   |   |   |   |   |   |   |   |   |   |   |   |   |   |   |   |   |   |   |   |   |   |   |   |   |   |   |   |   |   |   |   |   |   |   |   |   |   |   |   |   |   |   |   |   |   |   |   |   |   |   |   |   |   |   |   |   |   |   |   |   |   |   |   |   |   |   |   |   |   |   |   |   |   |   |   |   |   |   |   |   |   |   |   |   |   |   |   |   |   |   |   |   |   |   |   |   |   |   |   |   |   |   |   |   |   |   |   |   |   |   |   |   |   |   |   |   |   |   |   |   |   |   |   |   |   |   |   |   |   |   |   |   |   |   |   |   |   |   |   |   |   |   |   |   |   |   |   |   |   |   |   |   |   |   |   |   |   |   |   |   |   |   |   |   |   |   |   |   |   |   |   |   |   |   |   |   |   |   |   |   |   |   |   |   |   |   |   |   |   |   |   |   |   |   |   |   |   |   |   |   |   |   |   |   |   |   |   |   |   |   |   |   |   |   |   |   |   |   |   |   |   |   |   |   |   |   |   |   |   |   |   |   |   |   |   |   |   |   |   |   |   |   |   |   |   |   |   |   |   |   |   |   |   |   |   |   |   |   |   |   |   |   |   |   |   |   |   |   |   |   |   |   |   |   |   |   |   |   |   |   |   |   |   |   |   |   |   |   |   |   |   |   |   |   |   |   |   |   |   |   |   |   |   |   |   |   |   |   |   |   |   |   |   |   |   |   |   |   |   |   |   |   |   |   |   |   |   |   |   |   |   |   |   |   |   |   |   |   |   |   |   |   |   |   |   |   |   |   |   |   |   |   |   |   |   |   |   |   |   |   |   |   |   |   |   |   |   |   |   |   |   |   |   |   |   |   |   |   |   |   |   |   |   |   |   |   |   |   |   |   |   |   |   |   |   |   |   |   |   |   |   |   |   |   |   |   |   |   |   |   |   |   |   |   |   |   |   |   |   |   |   |   |   |   |   |   |   |   |   |   |   |   |   |   |   |   |   |   |   |   |   |   |   |   |   |   |   |   |   |   |   |   |   |   |   |   |   |   |   |   |   |   |   |   |   |   |   |   |   |   |   |   |   |   |   |   |   |   |   |   |   |   |   |   |   |   |   |   |   |   |   |   |   |   |   |   |   |   |   |
| SARS-CoV-2 NC_045512.2                              | (28397)  | C            | C      | C      | A      | A      | G      | G      | T      | T | T | A | C | C | A | A | T | A | C | T | G | C | T | T | G | T | T | C | A | C | A | A | T | G | C | A | A | T | T | C | C |   |   |   |   |   |   |   |   |   |   |   |   |   |   |   |   |   |   |   |   |   |   |   |   |   |   |   |   |   |   |   |   |   |   |   |   |   |   |   |   |   |   |   |   |   |   |   |   |   |   |   |   |   |   |   |   |   |   |   |   |   |   |   |   |   |   |   |   |   |   |   |   |   |   |   |   |   |   |   |   |   |   |   |   |   |   |   |   |   |   |   |   |   |   |   |   |   |   |   |   |   |   |   |   |   |   |   |   |   |   |   |   |   |   |   |   |   |   |   |   |   |   |   |   |   |   |   |   |   |   |   |   |   |   |   |   |   |   |   |   |   |   |   |   |   |   |   |   |   |   |   |   |   |   |   |   |   |   |   |   |   |   |   |   |   |   |   |   |   |   |   |   |   |   |   |   |   |   |   |   |   |   |   |   |   |   |   |   |   |   |   |   |   |   |   |   |   |   |   |   |   |   |   |   |   |   |   |   |   |   |   |   |   |   |   |   |   |   |   |   |   |   |   |   |   |   |   |   |   |   |   |   |   |   |   |   |   |   |   |   |   |   |   |   |   |   |   |   |   |   |   |   |   |   |   |   |   |   |   |   |   |   |   |   |   |   |   |   |   |   |   |   |   |   |   |   |   |   |   |   |   |   |   |   |   |   |   |   |   |   |   |   |   |   |   |   |   |   |   |   |   |   |   |   |   |   |   |   |   |   |   |   |   |   |   |   |   |   |   |   |   |   |   |   |   |   |   |   |   |   |   |   |   |   |   |   |   |   |   |   |   |   |   |   |   |   |   |   |   |   |   |   |   |   |   |   |   |   |   |   |   |   |   |   |   |   |   |   |   |   |   |   |   |   |   |   |   |   |   |   |   |   |   |   |   |   |   |   |   |   |   |   |   |   |   |   |   |   |   |   |   |   |   |   |   |   |   |   |   |   |   |   |   |   |   |   |   |   |   |   |   |   |   |   |   |   |   |   |   |   |   |   |   |   |   |   |   |   |   |   |   |   |   |   |   |   |   |   |   |   |   |   |   |   |   |   |   |   |   |   |   |   |   |   |   |   |   |   |   |   |   |   |   |   |   |   |   |   |   |   |   |   |   |   |   |   |   |   |   |   |   |   |   |   |   |   |   |   |   |   |   |   |   |   |   |   |   |   |   |   |   |   |   |   |   |   |   |   |   |   |   |   |   |   |   |   |   |   |   |   |   |   |   |   |   |   |   |   |   |   |   |   |   |   |   |   |   |   |   |   |   |   |   |   |   |   |   |   |   |   |   |   |   |   |   |   |   |   |   |   |   |   |   |   |   |   |   |   |   |   |   |   |   |   |   |   |   |   |   |   |   |   |   |   |   |   |   |   |   |   |   |   |   |   |   |   |   |   |   |   |   |   |   |   |   |   |   |   |   |   |   |   |   |   |   |   |
|                                                     |          | Section 1384 |        |        |        |        |        |        |        |   |   |   |   |   |   |   |   |   |   |   |   |   |   |   |   |   |   |   |   |   |   |   |   |   |   |   |   |   |   |   |   |   |   |   |   |   |   |   |   |   |   |   |   |   |   |   |   |   |   |   |   |   |   |   |   |   |   |   |   |   |   |   |   |   |   |   |   |   |   |   |   |   |   |   |   |   |   |   |   |   |   |   |   |   |   |   |   |   |   |   |   |   |   |   |   |   |   |   |   |   |   |   |   |   |   |   |   |   |   |   |   |   |   |   |   |   |   |   |   |   |   |   |   |   |   |   |   |   |   |   |   |   |   |   |   |   |   |   |   |   |   |   |   |   |   |   |   |   |   |   |   |   |   |   |   |   |   |   |   |   |   |   |   |   |   |   |   |   |   |   |   |   |   |   |   |   |   |   |   |   |   |   |   |   |   |   |   |   |   |   |   |   |   |   |   |   |   |   |   |   |   |   |   |   |   |   |   |   |   |   |   |   |   |   |   |   |   |   |   |   |   |   |   |   |   |   |   |   |   |   |   |   |   |   |   |   |   |   |   |   |   |   |   |   |   |   |   |   |   |   |   |   |   |   |   |   |   |   |   |   |   |   |   |   |   |   |   |   |   |   |   |   |   |   |   |   |   |   |   |   |   |   |   |   |   |   |   |   |   |   |   |   |   |   |   |   |   |   |   |   |   |   |   |   |   |   |   |   |   |   |   |   |   |   |   |   |   |   |   |   |   |   |   |   |   |   |   |   |   |   |   |   |   |   |   |   |   |   |   |   |   |   |   |   |   |   |   |   |   |   |   |   |   |   |   |   |   |   |   |   |   |   |   |   |   |   |   |   |   |   |   |   |   |   |   |   |   |   |   |   |   |   |   |   |   |   |   |   |   |   |   |   |   |   |   |   |   |   |   |   |   |   |   |   |   |   |   |   |   |   |   |   |   |   |   |   |   |   |   |   |   |   |   |   |   |   |   |   |   |   |   |   |   |   |   |   |   |   |   |   |   |   |   |   |   |   |   |   |   |   |   |   |   |   |   |   |   |   |   |   |   |   |   |   |   |   |   |   |   |   |   |   |   |   |   |   |   |   |   |   |   |   |   |   |   |   |   |   |   |   |   |   |   |   |   |   |   |   |   |   |   |   |   |   |   |   |   |   |   |   |   |   |   |   |   |   |   |   |   |   |   |   |   |   |   |   |   |   |   |   |   |   |   |   |   |   |   |   |   |   |   |   |   |   |   |   |   |   |   |   |   |   |   |   |   |   |   |   |   |   |   |   |   |   |   |   |   |   |   |   |   |   |   |   |   |   |   |   |   |   |   |   |   |   |   |   |   |   |   |   |   |   |   |   |   |   |   |   |   |   |   |   |   |   |   |   |   |   |   |   |   |   |   |   |   |   |   |   |   |   |   |   |   |   |   |   |   |   |   |   |   |   |   |   |   |   |   |   |   |   |   |   |   |   |   |   |   |   |   |   |   |   |   |   |   |   |   |
| Autographa californica nucleopolyhedrovirus NC 0... | (106492) | 106492       | 106502 | 106513 | 106524 | 106535 | 106546 | 106557 | 106568 |   |   |   |   |   |   |   |   |   |   |   |   |   |   |   |   |   |   |   |   |   |   |   |   |   |   |   |   |   |   |   |   |   |   |   |   |   |   |   |   |   |   |   |   |   |   |   |   |   |   |   |   |   |   |   |   |   |   |   |   |   |   |   |   |   |   |   |   |   |   |   |   |   |   |   |   |   |   |   |   |   |   |   |   |   |   |   |   |   |   |   |   |   |   |   |   |   |   |   |   |   |   |   |   |   |   |   |   |   |   |   |   |   |   |   |   |   |   |   |   |   |   |   |   |   |   |   |   |   |   |   |   |   |   |   |   |   |   |   |   |   |   |   |   |   |   |   |   |   |   |   |   |   |   |   |   |   |   |   |   |   |   |   |   |   |   |   |   |   |   |   |   |   |   |   |   |   |   |   |   |   |   |   |   |   |   |   |   |   |   |   |   |   |   |   |   |   |   |   |   |   |   |   |   |   |   |   |   |   |   |   |   |   |   |   |   |   |   |   |   |   |   |   |   |   |   |   |   |   |   |   |   |   |   |   |   |   |   |   |   |   |   |   |   |   |   |   |   |   |   |   |   |   |   |   |   |   |   |   |   |   |   |   |   |   |   |   |   |   |   |   |   |   |   |   |   |   |   |   |   |   |   |   |   |   |   |   |   |   |   |   |   |   |   |   |   |   |   |   |   |   |   |   |   |   |   |   |   |   |   |   |   |   |   |   |   |   |   |   |   |   |   |   |   |   |   |   |   |   |   |   |   |   |   |   |   |   |   |   |   |   |   |   |   |   |   |   |   |   |   |   |   |   |   |   |   |   |   |   |   |   |   |   |   |   |   |   |   |   |   |   |   |   |   |   |   |   |   |   |   |   |   |   |   |   |   |   |   |   |   |   |   |   |   |   |   |   |   |   |   |   |   |   |   |   |   |   |   |   |   |   |   |   |   |   |   |   |   |   |   |   |   |   |   |   |   |   |   |   |   |   |   |   |   |   |   |   |   |   |   |   |   |   |   |   |   |   |   |   |   |   |   |   |   |   |   |   |   |   |   |   |   |   |   |   |   |   |   |   |   |   |   |   |   |   |   |   |   |   |   |   |   |   |   |   |   |   |   |   |   |   |   |   |   |   |   |   |   |   |   |   |   |   |   |   |   |   |   |   |   |   |   |   |   |   |   |   |   |   |   |   |   |   |   |   |   |   |   |   |   |   |   |   |   |   |   |   |   |   |   |   |   |   |   |   |   |   |   |   |   |   |   |   |   |   |   |   |   |   |   |   |   |   |   |   |   |   |   |   |   |   |   |   |   |   |   |   |   |   |   |   |   |   |   |   |   |   |   |   |   |   |   |   |   |   |   |   |   |   |   |   |   |   |   |   |   |   |   |   |   |   |   |   |   |   |   |   |   |   |   |   |   |   |   |   |   |   |   |   |   |   |   |   |   |   |   |   |   |   |   |   |   |   |   |   |   |   |   |   |   |   |   |   |   |   |   |   |   |
|                                                     | (106260) | T            | T      | G      | T      | A      | C      | G      | G      | C | G | C | C | C | A | C | G | G | T | T | C | T | T | T | G | C | A | A | T | T | C | A | A | T | T | C | A | A | T | T | C | A |   |   |   |   |   |   |   |   |   |   |   |   |   |   |   |   |   |   |   |   |   |   |   |   |   |   |   |   |   |   |   |   |   |   |   |   |   |   |   |   |   |   |   |   |   |   |   |   |   |   |   |   |   |   |   |   |   |   |   |   |   |   |   |   |   |   |   |   |   |   |   |   |   |   |   |   |   |   |   |   |   |   |   |   |   |   |   |   |   |   |   |   |   |   |   |   |   |   |   |   |   |   |   |   |   |   |   |   |   |   |   |   |   |   |   |   |   |   |   |   |   |   |   |   |   |   |   |   |   |   |   |   |   |   |   |   |   |   |   |   |   |   |   |   |   |   |   |   |   |   |   |   |   |   |   |   |   |   |   |   |   |   |   |   |   |   |   |   |   |   |   |   |   |   |   |   |   |   |   |   |   |   |   |   |   |   |   |   |   |   |   |   |   |   |   |   |   |   |   |   |   |   |   |   |   |   |   |   |   |   |   |   |   |   |   |   |   |   |   |   |   |   |   |   |   |   |   |   |   |   |   |   |   |   |   |   |   |   |   |   |   |   |   |   |   |   |   |   |   |   |   |   |   |   |   |   |   |   |   |   |   |   |   |   |   |   |   |   |   |   |   |   |   |   |   |   |   |   |   |   |   |   |   |   |   |   |   |   |   |   |   |   |   |   |   |   |   |   |   |   |   |   |   |   |   |   |   |   |   |   |   |   |   |   |   |   |   |   |   |   |   |   |   |   |   |   |   |   |   |   |   |   |   |   |   |   |   |   |   |   |   |   |   |   |   |   |   |   |   |   |   |   |   |   |   |   |   |   |   |   |   |   |   |   |   |   |   |   |   |   |   |   |   |   |   |   |   |   |   |   |   |   |   |   |   |   |   |   |   |   |   |   |   |   |   |   |   |   |   |   |   |   |   |   |   |   |   |   |   |   |   |   |   |   |   |   |   |   |   |   |   |   |   |   |   |   |   |   |   |   |   |   |   |   |   |   |   |   |   |   |   |   |   |   |   |   |   |   |   |   |   |   |   |   |   |   |   |   |   |   |   |   |   |   |   |   |   |   |   |   |   |   |   |   |   |   |   |   |   |   |   |   |   |   |   |   |   |   |   |   |   |   |   |   |   |   |   |   |   |   |   |   |   |   |   |   |   |   |   |   |   |   |   |   |   |   |   |   |   |   |   |   |   |   |   |   |   |   |   |   |   |   |   |   |   |   |   |   |   |   |   |   |   |   |   |   |   |   |   |   |   |   |   |   |   |   |   |   |   |   |   |   |   |   |   |   |   |   |   |   |   |   |   |   |   |   |   |   |   |   |   |   |   |   |   |   |   |   |   |   |   |   |   |   |   |   |   |   |   |   |   |   |   |   |   |   |   |   |   |   |   |   |   |   |   |   |   |   |   |   |   |   |   |   |   |
| SARS-CoV-2 NC_045512.2                              | (28474)  | T            | C      | G      | A      | G      | G      | A      | -      | - | C | A | A | G | G | C | G | T | T | C | A | A | T | T | A | A | C | A | A | T | A | G | A | T | T | C | A | A | T | T | C | A |   |   |   |   |   |   |   |   |   |   |   |   |   |   |   |   |   |   |   |   |   |   |   |   |   |   |   |   |   |   |   |   |   |   |   |   |   |   |   |   |   |   |   |   |   |   |   |   |   |   |   |   |   |   |   |   |   |   |   |   |   |   |   |   |   |   |   |   |   |   |   |   |   |   |   |   |   |   |   |   |   |   |   |   |   |   |   |   |   |   |   |   |   |   |   |   |   |   |   |   |   |   |   |   |   |   |   |   |   |   |   |   |   |   |   |   |   |   |   |   |   |   |   |   |   |   |   |   |   |   |   |   |   |   |   |   |   |   |   |   |   |   |   |   |   |   |   |   |   |   |   |   |   |   |   |   |   |   |   |   |   |   |   |   |   |   |   |   |   |   |   |   |   |   |   |   |   |   |   |   |   |   |   |   |   |   |   |   |   |   |   |   |   |   |   |   |   |   |   |   |   |   |   |   |   |   |   |   |   |   |   |   |   |   |   |   |   |   |   |   |   |   |   |   |   |   |   |   |   |   |   |   |   |   |   |   |   |   |   |   |   |   |   |   |   |   |   |   |   |   |   |   |   |   |   |   |   |   |   |   |   |   |   |   |   |   |   |   |   |   |   |   |   |   |   |   |   |   |   |   |   |   |   |   |   |   |   |   |   |   |   |   |   |   |   |   |   |   |   |   |   |   |   |   |   |   |   |   |   |   |   |   |   |   |   |   |   |   |   |   |   |   |   |   |   |   |   |   |   |   |   |   |   |   |   |   |   |   |   |   |   |   |   |   |   |   |   |   |   |   |   |   |   |   |   |   |   |   |   |   |   |   |   |   |   |   |   |   |   |   |   |   |   |   |   |   |   |   |   |   |   |   |   |   |   |   |   |   |   |   |   |   |   |   |   |   |   |   |   |   |   |   |   |   |   |   |   |   |   |   |   |   |   |   |   |   |   |   |   |   |   |   |   |   |   |   |   |   |   |   |   |   |   |   |   |   |   |   |   |   |   |   |   |   |   |   |   |   |   |   |   |   |   |   |   |   |   |   |   |   |   |   |   |   |   |   |   |   |   |   |   |   |   |   |   |   |   |   |   |   |   |   |   |   |   |   |   |   |   |   |   |   |   |   |   |   |   |   |   |   |   |   |   |   |   |   |   |   |   |   |   |   |   |   |   |   |   |   |   |   |   |   |   |   |   |   |   |   |   |   |   |   |   |   |   |   |   |   |   |   |   |   |   |   |   |   |   |   |   |   |   |   |   |   |   |   |   |   |   |   |   |   |   |   |   |   |   |   |   |   |   |   |   |   |   |   |   |   |   |   |   |   |   |   |   |   |   |   |   |   |   |   |   |   |   |   |   |   |   |   |   |   |   |   |   |   |   |   |   |   |   |   |   |   |   |   |   |   |   |   |   |   |   |   |   |
|                                                     |          | Section 1385 |        |        |        |        |        |        |        |   |   |   |   |   |   |   |   |   |   |   |   |   |   |   |   |   |   |   |   |   |   |   |   |   |   |   |   |   |   |   |   |   |   |   |   |   |   |   |   |   |   |   |   |   |   |   |   |   |   |   |   |   |   |   |   |   |   |   |   |   |   |   |   |   |   |   |   |   |   |   |   |   |   |   |   |   |   |   |   |   |   |   |   |   |   |   |   |   |   |   |   |   |   |   |   |   |   |   |   |   |   |   |   |   |   |   |   |   |   |   |   |   |   |   |   |   |   |   |   |   |   |   |   |   |   |   |   |   |   |   |   |   |   |   |   |   |   |   |   |   |   |   |   |   |   |   |   |   |   |   |   |   |   |   |   |   |   |   |   |   |   |   |   |   |   |   |   |   |   |   |   |   |   |   |   |   |   |   |   |   |   |   |   |   |   |   |   |   |   |   |   |   |   |   |   |   |   |   |   |   |   |   |   |   |   |   |   |   |   |   |   |   |   |   |   |   |   |   |   |   |   |   |   |   |   |   |   |   |   |   |   |   |   |   |   |   |   |   |   |   |   |   |   |   |   |   |   |   |   |   |   |   |   |   |   |   |   |   |   |   |   |   |   |   |   |   |   |   |   |   |   |   |   |   |   |   |   |   |   |   |   |   |   |   |   |   |   |   |   |   |   |   |   |   |   |   |   |   |   |   |   |   |   |   |   |   |   |   |   |   |   |   |   |   |   |   |   |   |   |   |   |   |   |   |   |   |   |   |   |   |   |   |   |   |   |   |   |   |   |   |   |   |   |   |   |   |   |   |   |   |   |   |   |   |   |   |   |   |   |   |   |   |   |   |   |   |   |   |   |   |   |   |   |   |   |   |   |   |   |   |   |   |   |   |   |   |   |   |   |   |   |   |   |   |   |   |   |   |   |   |   |   |   |   |   |   |   |   |   |   |   |   |   |   |   |   |   |   |   |   |   |   |   |   |   |   |   |   |   |   |   |   |   |   |   |   |   |   |   |   |   |   |   |   |   |   |   |   |   |   |   |   |   |   |   |   |   |   |   |   |   |   |   |   |   |   |   |   |   |   |   |   |   |   |   |   |   |   |   |   |   |   |   |   |   |   |   |   |   |   |   |   |   |   |   |   |   |   |   |   |   |   |   |   |   |   |   |   |   |   |   |   |   |   |   |   |   |   |   |   |   |   |   |   |   |   |   |   |   |   |   |   |   |   |   |   |   |   |   |   |   |   |   |   |   |   |   |   |   |   |   |   |   |   |   |   |   |   |   |   |   |   |   |   |   |   |   |   |   |   |   |   |   |   |   |   |   |   |   |   |   |   |   |   |   |   |   |   |   |   |   |   |   |   |   |   |   |   |   |   |   |   |   |   |   |   |   |   |   |   |   |   |   |   |   |   |   |   |   |   |   |   |   |   |   |   |   |   |   |   |   |   |   |   |   |   |   |   |   |   |   |   |   |   |   |   |   |   |   |   |   |   |   |   |   |   |   |
| Autographa californica nucleopolyhedrovirus NC 0... | (106569) | 106569       | 106579 | 106590 | 106601 | 106612 | 106623 | 106634 | 106645 |   |   |   |   |   |   |   |   |   |   |   |   |   |   |   |   |   |   |   |   |   |   |   |   |   |   |   |   |   |   |   |   |   |   |   |   |   |   |   |   |   |   |   |   |   |   |   |   |   |   |   |   |   |   |   |   |   |   |   |   |   |   |   |   |   |   |   |   |   |   |   |   |   |   |   |   |   |   |   |   |   |   |   |   |   |   |   |   |   |   |   |   |   |   |   |   |   |   |   |   |   |   |   |   |   |   |   |   |   |   |   |   |   |   |   |   |   |   |   |   |   |   |   |   |   |   |   |   |   |   |   |   |   |   |   |   |   |   |   |   |   |   |   |   |   |   |   |   |   |   |   |   |   |   |   |   |   |   |   |   |   |   |   |   |   |   |   |   |   |   |   |   |   |   |   |   |   |   |   |   |   |   |   |   |   |   |   |   |   |   |   |   |   |   |   |   |   |   |   |   |   |   |   |   |   |   |   |   |   |   |   |   |   |   |   |   |   |   |   |   |   |   |   |   |   |   |   |   |   |   |   |   |   |   |   |   |   |   |   |   |   |   |   |   |   |   |   |   |   |   |   |   |   |   |   |   |   |   |   |   |   |   |   |   |   |   |   |   |   |   |   |   |   |   |   |   |   |   |   |   |   |   |   |   |   |   |   |   |   |   |   |   |   |   |   |   |   |   |   |   |   |   |   |   |   |   |   |   |   |   |   |   |   |   |   |   |   |   |   |   |   |   |   |   |   |   |   |   |   |   |   |   |   |   |   |   |   |   |   |   |   |   |   |   |   |   |   |   |   |   |   |   |   |   |   |   |   |   |   |   |   |   |   |   |   |   |   |   |   |   |   |   |   |   |   |   |   |   |   |   |   |   |   |   |   |   |   |   |   |   |   |   |   |   |   |   |   |   |   |   |   |   |   |   |   |   |   |   |   |   |   |   |   |   |   |   |   |   |   |   |   |   |   |   |   |   |   |   |   |   |   |   |   |   |   |   |   |   |   |   |   |   |   |   |   |   |   |   |   |   |   |   |   |   |   |   |   |   |   |   |   |   |   |   |   |   |   |   |   |   |   |   |   |   |   |   |   |   |   |   |   |   |   |   |   |   |   |   |   |   |   |   |   |   |   |   |   |   |   |   |   |   |   |   |   |   |   |   |   |   |   |   |   |   |   |   |   |   |   |   |   |   |   |   |   |   |   |   |   |   |   |   |   |   |   |   |   |   |   |   |   |   |   |   |   |   |   |   |   |   |   |   |   |   |   |   |   |   |   |   |   |   |   |   |   |   |   |   |   |   |   |   |   |   |   |   |   |   |   |   |   |   |   |   |   |   |   |   |   |   |   |   |   |   |   |   |   |   |   |   |   |   |   |   |   |   |   |   |   |   |   |   |   |   |   |   |   |   |   |   |   |   |   |   |   |   |   |   |   |   |   |   |   |   |   |   |   |   |   |   |   |   |   |   |   |   |   |   |   |   |   |   |   |   |   |   |   |   |
|                                                     | (106337) | A            | G      | C      | T      | T      | C      | C      | G      | G | T | A | T | C | C | A | T | C | G | C | G | C | A | G | A | T | G | G | G | T | A | A | A | C | C | A | T | A | C | A | A | C | A | A | T | T | C | A | A | T | T | C | A | A | T | T | C | A | A | T | T | C | A | A | T | T | C | A | A | T | T | C | A | A | T | T | C | A | A | T | T | C | A | A | T | T | C | A | A | T | T | C | A | A | T | T | C | A | A | T | T | C | A | A | T | T | C | A | A | T | T | C | A | A | T | T | C | A | A | T | T | C | A | A | T | T | C | A | A | T | T | C | A | A | T | T | C | A | A | T | T | C | A | A | T | T | C | A | A | T | T | C | A | A | T | T | C | A | A | T | T | C | A | A | T | T | C | A | A | T | T | C | A | A | T | T | C | A | A | T | T | C | A | A | T | T | C | A | A | T | T | C | A | A | T | T | C | A | A | T | T | C | A | A | T | T | C | A | A | T | T | C | A | A | T | T | C | A | A | T | T | C | A | A | T | T | C | A | A | T | T | C | A | A | T | T | C | A | A | T | T | C | A | A | T | T | C | A | A | T | T | C | A | A | T | T | C | A | A | T | T | C | A | A | T | T | C | A | A | T | T | C | A | A | T | T | C | A | A | T | T | C | A | A | T | T | C | A | A | T | T | C | A | A | T | T | C | A | A | T | T | C | A | A | T | T | C | A | A | T | T | C | A | A | T | T | C | A | A | T | T | C | A | A | T | T | C | A | A | T | T | C | A | A | T | T | C | A | A | T | T | C | A | A | T | T | C | A | A | T | T | C | A | A | T | T | C | A | A | T | T | C | A | A | T | T | C | A | A | T | T | C | A | A | T | T | C | A | A | T | T | C | A | A | T | T | C | A | A | T | T | C | A | A | T | T | C | A | A | T | T | C | A | A | T | T | C | A | A | T | T | C | A | A | T | T | C | A | A | T | T | C | A | A | T | T | C | A | A | T | T | C | A | A | T | T | C | A | A | T | T | C | A | A | T | T | C | A | A | T | T | C | A | A | T | T | C | A | A | T | T | C | A | A | T | T | C | A | A | T | T | C | A | A | T | T | C | A | A | T | T | C | A | A | T | T | C | A | A | T | T | C | A | A | T | T | C | A | A | T | T | C | A | A | T | T | C | A | A | T | T | C | A | A | T | T | C | A | A | T | T | C | A | A | T | T | C | A | A | T | T | C | A | A | T | T | C | A | A | T | T | C | A | A | T | T | C | A | A | T | T | C | A | A | T | T | C | A | A | T | T | C | A | A | T | T | C | A | A | T | T | C | A | A | T | T | C | A | A | T | T | C | A | A | T | T | C | A | A | T | T | C | A | A | T | T | C | A | A | T | T | C | A | A | T | T | C | A | A | T | T | C | A | A | T | T | C | A | A | T | T | C | A | A | T | T | C | A | A | T | T | C | A | A | T | T | C | A | A | T | T | C | A | A | T | T | C | A | A | T | T | C | A | A | T | T | C | A | A | T | T | C | A | A | T | T | C |

## SARS-CoV-2 &amp; Autographa californica nucleopolyhedrovirus.apr

|                                                     |          |                    |          |             |        |           |          |                    |                                           |
|-----------------------------------------------------|----------|--------------------|----------|-------------|--------|-----------|----------|--------------------|-------------------------------------------|
|                                                     |          | Section 1387       |          |             |        |           |          |                    |                                           |
| Autographa californica nucleopolyhedrovirus NC 0... | (106723) | 106723             | 106733   | 106744      | 106755 | 106766    | 106777   | 106788             | 106799                                    |
|                                                     | (106490) | CAATT              | TTAT     | CTCTCTCCTG  | CAG    | TTTGTT    | TTTTTC   | CAGC               | ATGTGTATTTCGAGCGGTGCCAGATGGCCGC           |
|                                                     | (28689)  | TGA                | ATACA    | CCAAAAGATCA | CATT   | GCACCCG   | -----    | CAATC              | CTGCTAAAC-----AATGCT--GCAATCGTGCTACA      |
|                                                     |          | Section 1388       |          |             |        |           |          |                    |                                           |
| Autographa californica nucleopolyhedrovirus NC 0... | (106800) | 106800             | 106810   | 106821      | 106832 | 106843    | 106854   | 106865             | 106876                                    |
|                                                     | (106567) | GTG                | TC       | TGCG        | ACTTTG | ACCA      | ACAC     | CGGGATCGCTCACGGAAC | AGCGGTCTCTATTGCAAAGTTTGA                  |
|                                                     | (28753)  | ACT                | TC       | CTCA        | AGGAAC | ACA       | ATTG     | CA-----AAAGGCTTCT  | ACGAG---AAGG-----GAGCAGAGGC               |
|                                                     |          | Section 1389       |          |             |        |           |          |                    |                                           |
| Autographa californica nucleopolyhedrovirus NC 0... | (106877) | 106877             | 106887   | 106898      | 106909 | 106920    | 106931   | 106942             | 106953                                    |
|                                                     | (106644) | TTGCCCGC           | TCA      | CAAGAA      | CTT    | TAA       | TGGT     | AG                 | CCCTTTACTTTTCGGCGT                        |
|                                                     | (28811)  | -----AG            | TCA      | A---GC      | CTC    | TTC       | TCGT     | TC                 | -----TCATCAGGTAG-TCGC--AACAGTTCAAGAA----- |
|                                                     |          | Section 1390       |          |             |        |           |          |                    |                                           |
| Autographa californica nucleopolyhedrovirus NC 0... | (106954) | 106954             | 106964   | 106975      | 106986 | 106997    | 107008   | 107019             | 107030                                    |
|                                                     | (106721) | ACACG              | TAC      | CGCTATGT    | CGCCA  | ATG       | TC       | CCGTT              | CAGAC                                     |
|                                                     | (28860)  | ----ATT            | CAACT    | ---         | C      | ---C      | AGCAG    | -----              | CAGT                                      |
|                                                     |          | Section 1391       |          |             |        |           |          |                    |                                           |
| Autographa californica nucleopolyhedrovirus NC 0... | (107031) | 107031             | 107041   | 107052      | 107063 | 107074    | 107085   | 107096             | 107107                                    |
|                                                     | (106798) | ATTAAATTT          | TC       | GTAAGCGG    | TG     | GCCT      | CGTAAT   | TAT                | TTCTACGAG                                 |
|                                                     | (28913)  | GGCGGTGA           | TG       | CTGCT---    | CT     | TGCT      | TTGCTGCT | GC                 | TT-----GACAGATTGAAC                       |
|                                                     |          | Section 1392       |          |             |        |           |          |                    |                                           |
| Autographa californica nucleopolyhedrovirus NC 0... | (107108) | 107108             | 107118   | 107129      | 107140 | 107151    | 107162   | 107173             | 107184                                    |
|                                                     | (106875) | CGTGCCGGGAATCGCGTT | AGA      | AAC         | GGC    | GACCAACCA | CAAA     | AC                 | GT                                        |
|                                                     | (28981)  | TAAAGGCC           | -----AAC | AAC         | AAC    | AAG       | G-----C  | CAAA               | CTGTCA--CTAAGAAATCTGCTGCTGAGGCTTCTAAG     |
|                                                     |          | Section 1393       |          |             |        |           |          |                    |                                           |
| Autographa californica nucleopolyhedrovirus NC 0... | (107185) | 107185             | 107195   | 107206      | 107217 | 107228    | 107239   | 107250             | 107261                                    |
|                                                     | (106952) | ATTTTAA            | GTTGT    | AA          | TTAT   | TTT       | TATGT    | AAAA               | AA                                        |
|                                                     | (29042)  | AAGCCTC            | GGCAA    | AA          | ACG    | TAC       | TGC      | CA--CT             | AA                                        |

## SARS-CoV-2 &amp; Autographa californica nucleopolyhedrovirus.apr

|                                                     |          |              |               |            |                    |           |         |            |                   |
|-----------------------------------------------------|----------|--------------|---------------|------------|--------------------|-----------|---------|------------|-------------------|
|                                                     |          | Section 1394 |               |            |                    |           |         |            |                   |
| Autographa californica nucleopolyhedrovirus NC 0... | (107262) | 107262       | 107272        | 107283     | 107294             | 107305    | 107316  | 107327     | 107338            |
|                                                     | (107029) | GCGCGGC      | GTACGACC      | TTTTGAAGC  | GCCTAAT            | TATTTTGA  | AAGAA   | TTTGTTC    | ATCGATTCAACAAAG   |
|                                                     | (29116)  | AACCAAAG     | GAATTTT       | GGGGA      | CCAGGAACT          | AATCAGACA | AGGAA   | -CTGATT    | ACAAACATTGGCCGC   |
|                                                     |          | Section 1395 |               |            |                    |           |         |            |                   |
| Autographa californica nucleopolyhedrovirus NC 0... | (107339) | 107339       | 107349        | 107360     | 107371             | 107382    | 107393  | 107404     | 107415            |
|                                                     | (107106) | GAA          | GTGAA         | AAATTGCGA  | AGATTCAAAATTTTCCAA | CA        | CAATTT  | AAATGAAAT  | ATTAAATAAAAA      |
|                                                     | (29192)  | TTT          | GCCCC         | AGCGC-TTCA | -GCGTTCTTCGGAATGT  | CGG       | GCATT   | GGCATG--GA | AGTCAACCTT        |
|                                                     |          | Section 1396 |               |            |                    |           |         |            |                   |
| Autographa californica nucleopolyhedrovirus NC 0... | (107416) | 107416       | 107426        | 107437     | 107448             | 107459    | 107470  | 107481     | 107492            |
|                                                     | (107183) | GGCC         | AAA           | TATGAA     | AATAAACAAATT       | CTCGG     | ATT     | TGTCCA     | AAGACGAAACT       |
|                                                     | (29263)  | GTTG         | ACC           | TACACA     | ---G---GTGC        | CATCAA    | ATTG    | GATGA      | CAAGAATTC         |
|                                                     |          | Section 1397 |               |            |                    |           |         |            |                   |
| Autographa californica nucleopolyhedrovirus NC 0... | (107493) | 107493       | 107503        | 107514     | 107525             | 107536    | 107547  | 107558     | 107569            |
|                                                     | (107260) | CTATT        | CAGAC         | TCAAAATTT  | TTTGC              | AAAGTA    | ATTAGTC | CTAGACC    | AGCCACCGGGC       |
|                                                     | (29334)  | ATAAG        | CATAT         | TGACGCA    | -TACAA             | AA--CAT   | TCCCA   | CCAACAG    | AGCCT----AA       |
|                                                     |          | Section 1398 |               |            |                    |           |         |            |                   |
| Autographa californica nucleopolyhedrovirus NC 0... | (107570) | 107570       | 107580        | 107591     | 107602             | 107613    | 107624  | 107635     | 107646            |
|                                                     | (107337) | CGT          | TCGTCTCA      | ACAAAG     | TCACTAGC           | GTAAAA    | ATCAGGG | CATGTGTG   | CGCCTGCTGGGCGTT   |
|                                                     | (29402)  | GAT          | GAAACTC       | AAGCCT     | T-ACCGCA           | GAGACA    | GAGAA   | AACAGCAAAC | TGTGA--CTCTTCTTCC |
|                                                     |          | Section 1399 |               |            |                    |           |         |            |                   |
| Autographa californica nucleopolyhedrovirus NC 0... | (107647) | 107647       | 107657        | 107668     | 107679             | 107690    | 107701  | 107712     | 107723            |
|                                                     | (107414) | TTTGG        | AAAGTCAATTTGC | AATCAAA    | CA                 | TAA       | CCAGTTG | ATTAAT     | CTGT              |
|                                                     | (29475)  | ATG--        | ATTTCTCCAAACA | AT         | TG---              | CAACA     | ATC---  | CATGA      | -GAGT             |
|                                                     |          | Section 1400 |               |            |                    |           |         |            |                   |
| Autographa californica nucleopolyhedrovirus NC 0... | (107724) | 107724       | 107734        | 107745     | 107756             | 107767    | 107778  | 107789     | 107800            |
|                                                     | (107491) | TCGAC        | GCTGG         | CTGT       | AACGGC             | GCTTGT    | TGC     | ACAC       | AGCGTT            |
|                                                     | (29539)  | T-GCAG       | ACCA          | CACA       | AG-GCAG            | ATGG      | CTAT    | ATAA       | ACGT--TT-----     |



SARS-CoV-2 & Autographa californica nucleopolyhedrovirus.apr

|                                                     |          |                                                                               |             |                                  |                          |                    |                    |                |        |
|-----------------------------------------------------|----------|-------------------------------------------------------------------------------|-------------|----------------------------------|--------------------------|--------------------|--------------------|----------------|--------|
|                                                     |          | Section 1401                                                                  |             |                                  |                          |                    |                    |                |        |
| Autographa californica nucleopolyhedrovirus NC 0... | (107801) | 107801                                                                        | 107811      | 107822                           | 107833                   | 107844             | 107855             | 107866         | 107877 |
|                                                     | (107568) | AGCGACTATCCA                                                                  | TACGAAGCAG  | ACAAATAACAA                      | TTGCCGTATGAA             | ACTCCAATAAGTTTCTAG | TTCAAGTAA          | AAG--AT        |        |
| SARS-CoV-2 NC_045512.2                              | (29600)  | AGTCTACTCTTG                                                                  | TGCAGAAATGA | ATTCTCGTAACT                     | ACATAGCACAA              | AGTAGATGTAG----    | TTAACTTTAA         | TCTCACA        |        |
|                                                     |          | Section 1402                                                                  |             |                                  |                          |                    |                    |                |        |
| Autographa californica nucleopolyhedrovirus NC 0... | (107878) | 107878                                                                        | 107888      | 107899                           | 107910                   | 107921             | 107932             | 107943         | 107954 |
|                                                     | (107643) | TGTTATAGA                                                                     | TACATTACC   | GTGTACGAGGAAAACTTA               | AGATTGTGTTACG            | CCTTGTGGCCCTATTT   | CCTATGGCCAT        |                |        |
| SARS-CoV-2 NC_045512.2                              | (29672)  | TAGCAATCTT                                                                    | --TAATCAG   | GTGTGTAAACATT--                  | AGGGAGGAC                | TTG-AAAGAGCCAC     | CA--CATTTT         | T--CACCGAGG    |        |
|                                                     |          | Section 1403                                                                  |             |                                  |                          |                    |                    |                |        |
| Autographa californica nucleopolyhedrovirus NC 0... | (107955) | 107955                                                                        | 107965      | 107976                           | 107987                   | 107998             | 108009             | 108020         | 108031 |
|                                                     | (107720) | AGACGCTGCC                                                                    | GACATTGT    | TAACTATAACAGGGTATT               | ATAAAATATTGTTT           | CAACAGCGGTCTAA     | ACCATGCGGTT        | C              |        |
| SARS-CoV-2 NC_045512.2                              | (29738)  | CCAC---                                                                       | GCGAGTAC    | GATCG----                        | AGTG----                 | TACAGTGAA          | CAATGCTAGGGAGAGCTG | CTATATGGAAGAGC | C      |
|                                                     |          | Section 1404                                                                  |             |                                  |                          |                    |                    |                |        |
| Autographa californica nucleopolyhedrovirus NC 0... | (108032) | 108032                                                                        | 108042      | 108053                           | 108064                   | 108075             | 108086             | 108097         | 108108 |
|                                                     | (107797) | TTTTAGTGGGTT                                                                  | ATGGTGTT    | GAAACAACAATT                     | CCATTATTGGACCTT          | AAAAACACTTGGGGC    | CACGGATTGGGG       | GAGAG          |        |
| SARS-CoV-2 NC_045512.2                              | (29803)  | CTAATGTGTAA                                                                   | ATTAATTTT-- | AG--TAGTGTAT                     | CCCCA--TG                | TGATTTTAA          | TAGCTTCTTAGGA      | GAATGACAAA     |        |
|                                                     |          | Section 1405                                                                  |             |                                  |                          |                    |                    |                |        |
| Autographa californica nucleopolyhedrovirus NC 0... | (108109) | 108109                                                                        | 108119      | 108130                           | 108141                   | 108152             | 108163             | 108174         | 108185 |
|                                                     | (107874) | GACGGATTTTTTC                                                                 | AGGGTACAA   | CAAAACATAAACGCCTGTGGTATGAGAAACGA | ACTTGCGTCTACTGCAGTCATTTA |                    |                    |                |        |
| SARS-CoV-2 NC_045512.2                              | (29874)  | AAAAA                                                                         | AAAAAA      | AAAAA                            | AAAAA                    | AAAAA              | AAAAA              | AAAAA          | AAAAA  |
|                                                     |          | Section 1406                                                                  |             |                                  |                          |                    |                    |                |        |
| Autographa californica nucleopolyhedrovirus NC 0... | (108186) | 108186                                                                        | 108196      | 108207                           | 108218                   | 108229             | 108240             | 108251         | 108262 |
|                                                     | (107951) | TTAATCTCAACACACTCGCTATTTGGAACATAATCATATCGTCTCAGTAGCTCAAGGTAGAGCGTAGCGCTCTGGAT |             |                                  |                          |                    |                    |                |        |
| SARS-CoV-2 NC_045512.2                              | (29904)  | -----                                                                         |             |                                  |                          |                    |                    |                |        |
|                                                     |          | Section 1407                                                                  |             |                                  |                          |                    |                    |                |        |
| Autographa californica nucleopolyhedrovirus NC 0... | (108263) | 108263                                                                        | 108273      | 108284                           | 108295                   | 108306             | 108317             | 108328         | 108339 |
|                                                     | (108028) | CGTATAGATCTTGCTAAGGTTGTGAGTTCAAGTCTCGCCTGAGATATTAAAAAACTTTGTAATTTTAAAAATTTTAT |             |                                  |                          |                    |                    |                |        |
| SARS-CoV-2 NC_045512.2                              | (29904)  | -----                                                                         |             |                                  |                          |                    |                    |                |        |

## SARS-CoV-2 &amp; Autographa californica nucleopolyhedrovirus.apr

|                                                     |          |                                                                                  |        |        |        |        |        |               |
|-----------------------------------------------------|----------|----------------------------------------------------------------------------------|--------|--------|--------|--------|--------|---------------|
|                                                     |          | Section 1408                                                                     |        |        |        |        |        |               |
| Autographa californica nucleopolyhedrovirus NC 0... | (108340) | 108340                                                                           | 108350 | 108361 | 108372 | 108383 | 108394 | 108405 108416 |
|                                                     | (108105) | TTTATAATATACAATTAAAAACTATACAATTTTATTATTACATTAATAATGATACAATTTTATTATTACATTTA       |        |        |        |        |        |               |
|                                                     | (29904)  | -----                                                                            |        |        |        |        |        |               |
|                                                     |          | Section 1409                                                                     |        |        |        |        |        |               |
| Autographa californica nucleopolyhedrovirus NC 0... | (108417) | 108417                                                                           | 108427 | 108438 | 108449 | 108460 | 108471 | 108482 108493 |
|                                                     | (108182) | ATATTGTCCTATTACGGTTTCTAATCATACAGTACAAAAATAAAATCACAATTAATATAATTACAAAGTTAACTACAT   |        |        |        |        |        |               |
|                                                     | (29904)  | -----                                                                            |        |        |        |        |        |               |
|                                                     |          | Section 1410                                                                     |        |        |        |        |        |               |
| Autographa californica nucleopolyhedrovirus NC 0... | (108494) | 108494                                                                           | 108504 | 108515 | 108526 | 108537 | 108548 | 108559 108570 |
|                                                     | (108259) | GACCAAACATGAACGAAGTCAATTTAGCGGCCAATTCGCCTTCAGCCATGGAAGTGATGTCGCTCAGACTGGTGCCG    |        |        |        |        |        |               |
|                                                     | (29904)  | -----                                                                            |        |        |        |        |        |               |
|                                                     |          | Section 1411                                                                     |        |        |        |        |        |               |
| Autographa californica nucleopolyhedrovirus NC 0... | (108571) | 108571                                                                           | 108581 | 108592 | 108603 | 108614 | 108625 | 108636 108647 |
|                                                     | (108336) | ACGCCGCCAACTTGGTGTTCTCCATGGTGGTTATGAGGTTGCTTTTTTGTGGGCAATAAACGACCAGCCGCTGGC      |        |        |        |        |        |               |
|                                                     | (29904)  | -----                                                                            |        |        |        |        |        |               |
|                                                     |          | Section 1412                                                                     |        |        |        |        |        |               |
| Autographa californica nucleopolyhedrovirus NC 0... | (108648) | 108648                                                                           | 108658 | 108669 | 108680 | 108691 | 108702 | 108713 108724 |
|                                                     | (108413) | ATCTTTCCAACGTGTCGTGATAGGTCGTGTTGCCGATGGTCGGGATCCAAACTCGACGTCGTGTCGTCGAATTGCTAGTT |        |        |        |        |        |               |
|                                                     | (29904)  | -----                                                                            |        |        |        |        |        |               |
|                                                     |          | Section 1413                                                                     |        |        |        |        |        |               |
| Autographa californica nucleopolyhedrovirus NC 0... | (108725) | 108725                                                                           | 108735 | 108746 | 108757 | 108768 | 108779 | 108790 108801 |
|                                                     | (108490) | CCTTGCTAGTTGCTAAATCTATGCATTGCGACGAGTCCGTGTTGGCCACCCAACGCCCTTCTTTGTAGATGCTGTTG    |        |        |        |        |        |               |
|                                                     | (29904)  | -----                                                                            |        |        |        |        |        |               |
|                                                     |          | Section 1414                                                                     |        |        |        |        |        |               |
| Autographa californica nucleopolyhedrovirus NC 0... | (108802) | 108802                                                                           | 108812 | 108823 | 108834 | 108845 | 108856 | 108867 108878 |
|                                                     | (108567) | TTGTAGCAATTACTGGTGTGTGCCGGCGGATTGGTGCACGGCATCAGCAAAAACGTGTCGTCCGACAAAAATGTTGA    |        |        |        |        |        |               |
|                                                     | (29904)  | -----                                                                            |        |        |        |        |        |               |

## SARS-CoV-2 &amp; Autographa californica nucleopolyhedrovirus.apr

|                                                     |          |                                                                                 |                        |                        |                        |                        |                        |                                               |
|-----------------------------------------------------|----------|---------------------------------------------------------------------------------|------------------------|------------------------|------------------------|------------------------|------------------------|-----------------------------------------------|
|                                                     |          | Section 1415                                                                    |                        |                        |                        |                        |                        |                                               |
| Autographa californica nucleopolyhedrovirus NC 0... | (108879) | <a href="#">108879</a>                                                          | <a href="#">108889</a> | <a href="#">108900</a> | <a href="#">108911</a> | <a href="#">108922</a> | <a href="#">108933</a> | <a href="#">108944</a> <a href="#">108955</a> |
|                                                     | (108644) | AGAAACAGAGTTGTTTCATGAGATTGCCAATCAAACGCTCGTCCACCTTGGCCACGGAGACTATCAGGTCGTGCAGCA  |                        |                        |                        |                        |                        |                                               |
|                                                     | (29904)  | -----                                                                           |                        |                        |                        |                        |                        |                                               |
|                                                     |          | Section 1416                                                                    |                        |                        |                        |                        |                        |                                               |
| Autographa californica nucleopolyhedrovirus NC 0... | (108956) | <a href="#">108956</a>                                                          | <a href="#">108966</a> | <a href="#">108977</a> | <a href="#">108988</a> | <a href="#">108999</a> | <a href="#">109010</a> | <a href="#">109021</a> <a href="#">109032</a> |
|                                                     | (108721) | TATTGTTTAGCTTGTTGATGTGCGCATGCATCAGCTCAATGTTTCATTTTCAGCAAATCGTTTTTCGTACATCAGCTCC |                        |                        |                        |                        |                        |                                               |
|                                                     | (29904)  | -----                                                                           |                        |                        |                        |                        |                        |                                               |
|                                                     |          | Section 1417                                                                    |                        |                        |                        |                        |                        |                                               |
| Autographa californica nucleopolyhedrovirus NC 0... | (109033) | <a href="#">109033</a>                                                          | <a href="#">109043</a> | <a href="#">109054</a> | <a href="#">109065</a> | <a href="#">109076</a> | <a href="#">109087</a> | <a href="#">109098</a> <a href="#">109109</a> |
|                                                     | (108798) | TCTTGAATATGCATCAGGTCGCCTTTGGTGGCAGTGCTCCCTCTGTGTACTTGGCTCTAACGTTGTGGCGCCAAGT    |                        |                        |                        |                        |                        |                                               |
|                                                     | (29904)  | -----                                                                           |                        |                        |                        |                        |                        |                                               |
|                                                     |          | Section 1418                                                                    |                        |                        |                        |                        |                        |                                               |
| Autographa californica nucleopolyhedrovirus NC 0... | (109110) | <a href="#">109110</a>                                                          | <a href="#">109120</a> | <a href="#">109131</a> | <a href="#">109142</a> | <a href="#">109153</a> | <a href="#">109164</a> | <a href="#">109175</a> <a href="#">109186</a> |
|                                                     | (108875) | GGGCGGCCGCTTCTTGACTCGGTGCTCGACTTTGCGTTTAATGCATCTGTAAACTTGCAGTTCCACGTGTTTTAG     |                        |                        |                        |                        |                        |                                               |
|                                                     | (29904)  | -----                                                                           |                        |                        |                        |                        |                        |                                               |
|                                                     |          | Section 1419                                                                    |                        |                        |                        |                        |                        |                                               |
| Autographa californica nucleopolyhedrovirus NC 0... | (109187) | <a href="#">109187</a>                                                          | <a href="#">109197</a> | <a href="#">109208</a> | <a href="#">109219</a> | <a href="#">109230</a> | <a href="#">109241</a> | <a href="#">109252</a> <a href="#">109263</a> |
|                                                     | (108952) | AAAGATCATATATATCATTTGTCAATCAAACAGTGTTTCGCGTGTCACCGACTCGGGGTTATTTTTGTCATCTTTAATG |                        |                        |                        |                        |                        |                                               |
|                                                     | (29904)  | -----                                                                           |                        |                        |                        |                        |                        |                                               |
|                                                     |          | Section 1420                                                                    |                        |                        |                        |                        |                        |                                               |
| Autographa californica nucleopolyhedrovirus NC 0... | (109264) | <a href="#">109264</a>                                                          | <a href="#">109274</a> | <a href="#">109285</a> | <a href="#">109296</a> | <a href="#">109307</a> | <a href="#">109318</a> | <a href="#">109329</a> <a href="#">109340</a> |
|                                                     | (109029) | AGCAGACACGCAGCTTTTATTTGGCGCGTGGTGAACGTAGACTTTTGTTTGAGAATCATACTCACGCCGTCTCGATG   |                        |                        |                        |                        |                        |                                               |
|                                                     | (29904)  | -----                                                                           |                        |                        |                        |                        |                        |                                               |
|                                                     |          | Section 1421                                                                    |                        |                        |                        |                        |                        |                                               |
| Autographa californica nucleopolyhedrovirus NC 0... | (109341) | <a href="#">109341</a>                                                          | <a href="#">109351</a> | <a href="#">109362</a> | <a href="#">109373</a> | <a href="#">109384</a> | <a href="#">109395</a> | <a href="#">109406</a> <a href="#">109417</a> |
|                                                     | (109106) | AAGCACAGTGTCCACGGTCACGTTGATGGGGTTGCCCTCAGCGTCCAAAATGTATACCTGGCACTCGTCCGTGTCGT   |                        |                        |                        |                        |                        |                                               |
|                                                     | (29904)  | -----                                                                           |                        |                        |                        |                        |                        |                                               |

## SARS-CoV-2 &amp; Autographa californica nucleopolyhedrovirus.apr

|                                                     |          |                                                                                |        |        |        |        |        |               |
|-----------------------------------------------------|----------|--------------------------------------------------------------------------------|--------|--------|--------|--------|--------|---------------|
|                                                     |          | Section 1422                                                                   |        |        |        |        |        |               |
| Autographa californica nucleopolyhedrovirus NC 0... | (109418) | 109418                                                                         | 109428 | 109439 | 109450 | 109461 | 109472 | 109483 109494 |
|                                                     | (109183) | CCTGGCACTCGAGCCTGCTGTACATTTTCGAAGTGGAAATGCCGCATCGCCACGATTTGTTGCACGTGTGGTGCGCA  |        |        |        |        |        |               |
|                                                     | (29904)  | -----                                                                          |        |        |        |        |        |               |
|                                                     |          | Section 1423                                                                   |        |        |        |        |        |               |
| Autographa californica nucleopolyhedrovirus NC 0... | (109495) | 109495                                                                         | 109505 | 109516 | 109527 | 109538 | 109549 | 109560 109571 |
|                                                     | (109260) | AAGTGATTGTTATTCTGCCGCTTCACCAACTCTTTGCCCTTGACCCACTGGCCGCGGCCCTCGTTGTGCGGAAAACA  |        |        |        |        |        |               |
|                                                     | (29904)  | -----                                                                          |        |        |        |        |        |               |
|                                                     |          | Section 1424                                                                   |        |        |        |        |        |               |
| Autographa californica nucleopolyhedrovirus NC 0... | (109572) | 109572                                                                         | 109582 | 109593 | 109604 | 109615 | 109626 | 109637 109648 |
|                                                     | (109337) | GTCGTCGCTGTCACTGCCCCAACGGTCGATCAGCTCTTCGCCCACCTCGCACTGCTGCCTGATGCTCCACATAAGCA  |        |        |        |        |        |               |
|                                                     | (29904)  | -----                                                                          |        |        |        |        |        |               |
|                                                     |          | Section 1425                                                                   |        |        |        |        |        |               |
| Autographa californica nucleopolyhedrovirus NC 0... | (109649) | 109649                                                                         | 109659 | 109670 | 109681 | 109692 | 109703 | 109714 109725 |
|                                                     | (109414) | AATCCTCTTTGCCACATTTCAGCGTTTTTCATGGTTTCTTCGACGCGTGTGTTGGGATCCAGCGAGCCGCCGTTGTAC |        |        |        |        |        |               |
|                                                     | (29904)  | -----                                                                          |        |        |        |        |        |               |
|                                                     |          | Section 1426                                                                   |        |        |        |        |        |               |
| Autographa californica nucleopolyhedrovirus NC 0... | (109726) | 109726                                                                         | 109736 | 109747 | 109758 | 109769 | 109780 | 109791 109802 |
|                                                     | (109491) | GCATACGCCTGGTAGTACCCCTTGTAGCCGATAATCACGTTTTTCGTTGTAGTCCGTCTCCACGATGGTGATTTCCAC |        |        |        |        |        |               |
|                                                     | (29904)  | -----                                                                          |        |        |        |        |        |               |
|                                                     |          | Section 1427                                                                   |        |        |        |        |        |               |
| Autographa californica nucleopolyhedrovirus NC 0... | (109803) | 109803                                                                         | 109813 | 109824 | 109835 | 109846 | 109857 | 109868 109879 |
|                                                     | (109568) | GTCCTTTTGCAGCGTTTCTTGGGCGGGGTAATGTCCAAGTTTTTAATCTTGACGGACCCGTCTTCATTTGCGCGT    |        |        |        |        |        |               |
|                                                     | (29904)  | -----                                                                          |        |        |        |        |        |               |
|                                                     |          | Section 1428                                                                   |        |        |        |        |        |               |
| Autographa californica nucleopolyhedrovirus NC 0... | (109880) | 109880                                                                         | 109890 | 109901 | 109912 | 109923 | 109934 | 109945 109956 |
|                                                     | (109645) | TGCAGTGCTCCGCCGCAAAGGCAGAAATGCGCCGCCGCCGCAAAAGCACATATAAAACAATAGCGCTTACCATCTTG  |        |        |        |        |        |               |
|                                                     | (29904)  | -----                                                                          |        |        |        |        |        |               |

## SARS-CoV-2 &amp; Autographa californica nucleopolyhedrovirus.apr

|                                                     |          |                                                                                |                        |                        |                        |                        |                        |                                               |
|-----------------------------------------------------|----------|--------------------------------------------------------------------------------|------------------------|------------------------|------------------------|------------------------|------------------------|-----------------------------------------------|
|                                                     |          | Section 1429                                                                   |                        |                        |                        |                        |                        |                                               |
| Autographa californica nucleopolyhedrovirus NC 0... | (109957) | <a href="#">109957</a>                                                         | <a href="#">109967</a> | <a href="#">109978</a> | <a href="#">109989</a> | <a href="#">110000</a> | <a href="#">110011</a> | <a href="#">110022</a> <a href="#">110033</a> |
|                                                     | (109722) | CTTGTGTGTTTCCTTATTGAAGCCTTGGTGTGACTGATTTACTAGTAGCATTGAGGCATCTTATATACCCGACCGTTA |                        |                        |                        |                        |                        |                                               |
|                                                     | (29904)  | -----                                                                          |                        |                        |                        |                        |                        |                                               |
|                                                     |          | Section 1430                                                                   |                        |                        |                        |                        |                        |                                               |
| Autographa californica nucleopolyhedrovirus NC 0... | (110034) | <a href="#">110034</a>                                                         | <a href="#">110044</a> | <a href="#">110055</a> | <a href="#">110066</a> | <a href="#">110077</a> | <a href="#">110088</a> | <a href="#">110099</a> <a href="#">110110</a> |
|                                                     | (109799) | TCTGGCCTACGTGACACAAGGCACGTTGTTAGATTAATAATCTTATCTTTTTATCTTAATTGATAAGATTATTTTAA  |                        |                        |                        |                        |                        |                                               |
|                                                     | (29904)  | -----                                                                          |                        |                        |                        |                        |                        |                                               |
|                                                     |          | Section 1431                                                                   |                        |                        |                        |                        |                        |                                               |
| Autographa californica nucleopolyhedrovirus NC 0... | (110111) | <a href="#">110111</a>                                                         | <a href="#">110121</a> | <a href="#">110132</a> | <a href="#">110143</a> | <a href="#">110154</a> | <a href="#">110165</a> | <a href="#">110176</a> <a href="#">110187</a> |
|                                                     | (109876) | TCTGGCTGTTATAAAAACGGGATCATGAACACGGACGCTCAGTCGACATCGAACACGCGCAACTTCATGTACTCTCC  |                        |                        |                        |                        |                        |                                               |
|                                                     | (29904)  | -----                                                                          |                        |                        |                        |                        |                        |                                               |
|                                                     |          | Section 1432                                                                   |                        |                        |                        |                        |                        |                                               |
| Autographa californica nucleopolyhedrovirus NC 0... | (110188) | <a href="#">110188</a>                                                         | <a href="#">110198</a> | <a href="#">110209</a> | <a href="#">110220</a> | <a href="#">110231</a> | <a href="#">110242</a> | <a href="#">110253</a> <a href="#">110264</a> |
|                                                     | (109953) | CGACAGCAGTCTGGAGGTGGTCATCATTACCAATTCGGACGGCGATCACGATGGCTATCTGGAACCTAACCGCCGCCG |                        |                        |                        |                        |                        |                                               |
|                                                     | (29904)  | -----                                                                          |                        |                        |                        |                        |                        |                                               |
|                                                     |          | Section 1433                                                                   |                        |                        |                        |                        |                        |                                               |
| Autographa californica nucleopolyhedrovirus NC 0... | (110265) | <a href="#">110265</a>                                                         | <a href="#">110275</a> | <a href="#">110286</a> | <a href="#">110297</a> | <a href="#">110308</a> | <a href="#">110319</a> | <a href="#">110330</a> <a href="#">110341</a> |
|                                                     | (110030) | CCAAAGTCATGTCACCTTTTCTTAGCAACGGCAGTTCGGCCGTGTGGACCAACGCGGCGCCCTCGCACAAATTGATT  |                        |                        |                        |                        |                        |                                               |
|                                                     | (29904)  | -----                                                                          |                        |                        |                        |                        |                        |                                               |
|                                                     |          | Section 1434                                                                   |                        |                        |                        |                        |                        |                                               |
| Autographa californica nucleopolyhedrovirus NC 0... | (110342) | <a href="#">110342</a>                                                         | <a href="#">110352</a> | <a href="#">110363</a> | <a href="#">110374</a> | <a href="#">110385</a> | <a href="#">110396</a> | <a href="#">110407</a> <a href="#">110418</a> |
|                                                     | (110107) | AAAAACAATAAAAATTATATTCATGTGTTTGGTTTATTTAAATATCTGTCAAATTACAATTTAAATAATAAAAAGCG  |                        |                        |                        |                        |                        |                                               |
|                                                     | (29904)  | -----                                                                          |                        |                        |                        |                        |                        |                                               |
|                                                     |          | Section 1435                                                                   |                        |                        |                        |                        |                        |                                               |
| Autographa californica nucleopolyhedrovirus NC 0... | (110419) | <a href="#">110419</a>                                                         | <a href="#">110429</a> | <a href="#">110440</a> | <a href="#">110451</a> | <a href="#">110462</a> | <a href="#">110473</a> | <a href="#">110484</a> <a href="#">110495</a> |
|                                                     | (110184) | TCCTAAAGAGTATTACACCCTTAAATCGATTATTAGCGACTTGCTTATGGGCGCTCAAGGCAAAGTATTTGATCCGC  |                        |                        |                        |                        |                        |                                               |
|                                                     | (29904)  | -----                                                                          |                        |                        |                        |                        |                        |                                               |

## SARS-CoV-2 &amp; Autographa californica nucleopolyhedrovirus.apr

|                                                     |          |                                                                                  |        |        |        |        |        |               |
|-----------------------------------------------------|----------|----------------------------------------------------------------------------------|--------|--------|--------|--------|--------|---------------|
|                                                     |          | Section 1436                                                                     |        |        |        |        |        |               |
| Autographa californica nucleopolyhedrovirus NC 0... | (110496) | 110496                                                                           | 110506 | 110517 | 110528 | 110539 | 110550 | 110561 110572 |
|                                                     | (110261) | TTTGCGAAGTAAAAACGCAACTGTGTGCGATTTCAGGAGAGTCTCAACGAGGCTATTTTCGATTTTGAACGTTTCATAGC |        |        |        |        |        |               |
|                                                     | (29904)  | -----                                                                            |        |        |        |        |        |               |
|                                                     |          | Section 1437                                                                     |        |        |        |        |        |               |
| Autographa californica nucleopolyhedrovirus NC 0... | (110573) | 110573                                                                           | 110583 | 110594 | 110605 | 110616 | 110627 | 110638 110649 |
|                                                     | (110338) | AACGATGCGGCCGCCAACCCGCCTGCGCCAGACATTAACAAGTTGCAAGAAGTATACAAAGATTTGCAGTCTGAATA    |        |        |        |        |        |               |
|                                                     | (29904)  | -----                                                                            |        |        |        |        |        |               |
|                                                     |          | Section 1438                                                                     |        |        |        |        |        |               |
| Autographa californica nucleopolyhedrovirus NC 0... | (110650) | 110650                                                                           | 110660 | 110671 | 110682 | 110693 | 110704 | 110715 110726 |
|                                                     | (110415) | CAATAAAAAAATTACCTTTACCACTGATACAATTTTGGAGAATTTAAAAAATATAAAGGATTTAATGTGCCTGAATA    |        |        |        |        |        |               |
|                                                     | (29904)  | -----                                                                            |        |        |        |        |        |               |
|                                                     |          | Section 1439                                                                     |        |        |        |        |        |               |
| Autographa californica nucleopolyhedrovirus NC 0... | (110727) | 110727                                                                           | 110737 | 110748 | 110759 | 110770 | 110781 | 110792 110803 |
|                                                     | (110497) | AATAATAATAAGGGTTTTGTACGATTTCAACAATGAACTTTTGGGCCACGTTTAGCATTTGTCTGGTGGGTATTG      |        |        |        |        |        |               |
|                                                     | (29904)  | -----                                                                            |        |        |        |        |        |               |
|                                                     |          | Section 1440                                                                     |        |        |        |        |        |               |
| Autographa californica nucleopolyhedrovirus NC 0... | (110804) | 110804                                                                           | 110814 | 110825 | 110836 | 110847 | 110858 | 110869 110880 |
|                                                     | (110569) | GTGTACGCGGGACACTTGAATAACGAGCTACAAGAAATAAAATCAATATTAGTGGTCATGTACGAATCTATGGAAAA    |        |        |        |        |        |               |
|                                                     | (29904)  | -----                                                                            |        |        |        |        |        |               |
|                                                     |          | Section 1441                                                                     |        |        |        |        |        |               |
| Autographa californica nucleopolyhedrovirus NC 0... | (110881) | 110881                                                                           | 110891 | 110902 | 110913 | 110924 | 110935 | 110946 110957 |
|                                                     | (110646) | GCATTTTTTCCAATGTGGTAGACGAAATTGATTCTCTTAAACGGACACGTTTATGATGTTGAGCAACTTGCAAAATA    |        |        |        |        |        |               |
|                                                     | (29904)  | -----                                                                            |        |        |        |        |        |               |
|                                                     |          | Section 1442                                                                     |        |        |        |        |        |               |
| Autographa californica nucleopolyhedrovirus NC 0... | (110958) | 110958                                                                           | 110968 | 110979 | 110990 | 111001 | 111012 | 111023 111034 |
|                                                     | (110723) | ACACGATTTCGAACGTGGGACGCAGTTGTAAAAAATGGCAAAAAATATCCAATCTCGACGAAAAAATTAACGTGTTA    |        |        |        |        |        |               |
|                                                     | (29904)  | -----                                                                            |        |        |        |        |        |               |

## SARS-CoV-2 &amp; Autographa californica nucleopolyhedrovirus.apr

|                                                     |          |                                                                                  |        |        |        |        |        |               |
|-----------------------------------------------------|----------|----------------------------------------------------------------------------------|--------|--------|--------|--------|--------|---------------|
|                                                     |          | Section 1443                                                                     |        |        |        |        |        |               |
| Autographa californica nucleopolyhedrovirus NC 0... | (111035) | 111035                                                                           | 111045 | 111056 | 111067 | 111078 | 111089 | 111100 111111 |
|                                                     | (110800) | TTAACAAAAAACGGGGTAGTTAACAACTGCTAAACGTTCAATAAACGCTTATCACTAAGTTAATATACTAAAAATC     |        |        |        |        |        |               |
|                                                     | (29904)  | -----                                                                            |        |        |        |        |        |               |
|                                                     |          | Section 1444                                                                     |        |        |        |        |        |               |
| Autographa californica nucleopolyhedrovirus NC 0... | (111112) | 111112                                                                           | 111122 | 111133 | 111144 | 111155 | 111166 | 111177 111188 |
|                                                     | (110877) | ACATAGTCACTACAATATTTCAAAATATGAAGCCGACGAATAACGTTATGTTTCGACGACGCGTCGGTCCTTTGGATC   |        |        |        |        |        |               |
|                                                     | (29904)  | -----                                                                            |        |        |        |        |        |               |
|                                                     |          | Section 1445                                                                     |        |        |        |        |        |               |
| Autographa californica nucleopolyhedrovirus NC 0... | (111189) | 111189                                                                           | 111199 | 111210 | 111221 | 111232 | 111243 | 111254 111265 |
|                                                     | (110954) | GACACGGACTACATTTATCAAAATTTAAAAATGCCTTTGCAGGCGTTTCAACAACCTTTGTTTACCATTCCATCTAA    |        |        |        |        |        |               |
|                                                     | (29904)  | -----                                                                            |        |        |        |        |        |               |
|                                                     |          | Section 1446                                                                     |        |        |        |        |        |               |
| Autographa californica nucleopolyhedrovirus NC 0... | (111266) | 111266                                                                           | 111276 | 111287 | 111298 | 111309 | 111320 | 111331 111342 |
|                                                     | (111031) | ACATAGAAAAATGATCAACGATGCGGGCGGATCGTGTCATAACACGGTCAAATACATGGTGGACATTTACGGAGCGG    |        |        |        |        |        |               |
|                                                     | (29904)  | -----                                                                            |        |        |        |        |        |               |
|                                                     |          | Section 1447                                                                     |        |        |        |        |        |               |
| Autographa californica nucleopolyhedrovirus NC 0... | (111343) | 111343                                                                           | 111353 | 111364 | 111375 | 111386 | 111397 | 111408 111419 |
|                                                     | (111108) | CCGTTCTGGTTTTTGC GAACGCCTTGCTCGTTTCGCCGACCAGTTGTTGAGCACATTTATTGCAAACAATTATTTGTGC |        |        |        |        |        |               |
|                                                     | (29904)  | -----                                                                            |        |        |        |        |        |               |
|                                                     |          | Section 1448                                                                     |        |        |        |        |        |               |
| Autographa californica nucleopolyhedrovirus NC 0... | (111420) | 111420                                                                           | 111430 | 111441 | 111452 | 111463 | 111474 | 111485 111496 |
|                                                     | (111185) | TACTTTTACCGTCGTCGCCGATCACGATCACGCTCACGATCACGCTCGCGATCACGTTCTCCTCATTGCAGACCTCG    |        |        |        |        |        |               |
|                                                     | (29904)  | -----                                                                            |        |        |        |        |        |               |
|                                                     |          | Section 1449                                                                     |        |        |        |        |        |               |
| Autographa californica nucleopolyhedrovirus NC 0... | (111497) | 111497                                                                           | 111507 | 111518 | 111529 | 111540 | 111551 | 111562 111573 |
|                                                     | (111262) | TTCGCGCTCTCCTCATTGCAGACCTCGTTTCGCGATCTCGGTCCCGGTCTAGATCGCGGTACGTTTCATCGTCTCCCA   |        |        |        |        |        |               |
|                                                     | (29904)  | -----                                                                            |        |        |        |        |        |               |

## SARS-CoV-2 &amp; Autographa californica nucleopolyhedrovirus.apr

|                                                     |          |                                                                                 |        |        |        |        |        |               |
|-----------------------------------------------------|----------|---------------------------------------------------------------------------------|--------|--------|--------|--------|--------|---------------|
|                                                     |          | Section 1450                                                                    |        |        |        |        |        |               |
| Autographa californica nucleopolyhedrovirus NC 0... | (111574) | 111574                                                                          | 111584 | 111595 | 111606 | 111617 | 111628 | 111639 111650 |
|                                                     | (111339) | GGCGAGGGCGTCGACAAATATTTCGACGCGCTGGAAAAGATTTCGTCATCAAAACGACATGTTGATGAGCAACGTCAAC |        |        |        |        |        |               |
|                                                     | (29904)  | -----                                                                           |        |        |        |        |        |               |
|                                                     |          | Section 1451                                                                    |        |        |        |        |        |               |
| Autographa californica nucleopolyhedrovirus NC 0... | (111651) | 111651                                                                          | 111661 | 111672 | 111683 | 111694 | 111705 | 111716 111727 |
|                                                     | (111416) | CAAATAAATCTCAACCAAATAATCAATTTTGTAGAAATTGTCCAACATGATGACGGGCGTGCGCAATCAAAACGTGCA  |        |        |        |        |        |               |
|                                                     | (29904)  | -----                                                                           |        |        |        |        |        |               |
|                                                     |          | Section 1452                                                                    |        |        |        |        |        |               |
| Autographa californica nucleopolyhedrovirus NC 0... | (111728) | 111728                                                                          | 111738 | 111749 | 111760 | 111771 | 111782 | 111793 111804 |
|                                                     | (111493) | GCTCCTCGCGGCGTTGGAAACCGCTAAAGATGTTATTTGACCAGATTAAACACATTGCTTGCCGAGATTACAGACT    |        |        |        |        |        |               |
|                                                     | (29904)  | -----                                                                           |        |        |        |        |        |               |
|                                                     |          | Section 1453                                                                    |        |        |        |        |        |               |
| Autographa californica nucleopolyhedrovirus NC 0... | (111805) | 111805                                                                          | 111815 | 111826 | 111837 | 111848 | 111859 | 111870 111881 |
|                                                     | (111570) | CGTTACCCGACTTGACGTCCATGTTAGATAAATTAGCTGAACAATTGTTGGACGCCATCAACACGGTGCAGCAAACC   |        |        |        |        |        |               |
|                                                     | (29904)  | -----                                                                           |        |        |        |        |        |               |
|                                                     |          | Section 1454                                                                    |        |        |        |        |        |               |
| Autographa californica nucleopolyhedrovirus NC 0... | (111882) | 111882                                                                          | 111892 | 111903 | 111914 | 111925 | 111936 | 111947 111958 |
|                                                     | (111647) | TGCGCAACGAGTTGAACAACACCAACTCTATTTTGACCAATTTAGCGTCAAGCGTCACAAACATCAACGGTACGCTC   |        |        |        |        |        |               |
|                                                     | (29904)  | -----                                                                           |        |        |        |        |        |               |
|                                                     |          | Section 1455                                                                    |        |        |        |        |        |               |
| Autographa californica nucleopolyhedrovirus NC 0... | (111959) | 111959                                                                          | 111969 | 111980 | 111991 | 112002 | 112013 | 112024 112035 |
|                                                     | (111724) | AACAAATTTGCTAGCCGCTATCGAAAACCTTAGTAGGCGGCGGCGGCGGTGGCAATTTTAACGAAGCCGACAGACAAAA |        |        |        |        |        |               |
|                                                     | (29904)  | -----                                                                           |        |        |        |        |        |               |
|                                                     |          | Section 1456                                                                    |        |        |        |        |        |               |
| Autographa californica nucleopolyhedrovirus NC 0... | (112036) | 112036                                                                          | 112046 | 112057 | 112068 | 112079 | 112090 | 112101 112112 |
|                                                     | (111801) | ACTGGACCTCGTGTACACTTTGGTTAACGAAATCAAAAATATACTCACGGGAACGCTGACAAAAAATAAGCATGTC    |        |        |        |        |        |               |
|                                                     | (29904)  | -----                                                                           |        |        |        |        |        |               |



## SARS-CoV-2 &amp; Autographa californica nucleopolyhedrovirus.apr

|                                                     |          |                                                                                |        |        |        |        |        |               |
|-----------------------------------------------------|----------|--------------------------------------------------------------------------------|--------|--------|--------|--------|--------|---------------|
|                                                     |          | Section 1457                                                                   |        |        |        |        |        |               |
| Autographa californica nucleopolyhedrovirus NC 0... | (112113) | 112113                                                                         | 112123 | 112134 | 112145 | 112156 | 112167 | 112178 112189 |
|                                                     | (111878) | CGACAAAACACCAACAAAAAGGGTGGCAGCCATGCCATGACGTTGCGAGAGCGCGGCGTAACAAAACCCCCAAAAA   |        |        |        |        |        |               |
|                                                     | (29904)  | -----                                                                          |        |        |        |        |        |               |
|                                                     |          | Section 1458                                                                   |        |        |        |        |        |               |
| Autographa californica nucleopolyhedrovirus NC 0... | (112190) | 112190                                                                         | 112200 | 112211 | 112222 | 112233 | 112244 | 112255 112266 |
|                                                     | (111955) | AGTCTGAAAAGTTGCAGCAATACAAGAAAGCCATCGCTGCCGAGCAAACGCTGCGCACCCACAGCAGATGTTTCTTCT |        |        |        |        |        |               |
|                                                     | (29904)  | -----                                                                          |        |        |        |        |        |               |
|                                                     |          | Section 1459                                                                   |        |        |        |        |        |               |
| Autographa californica nucleopolyhedrovirus NC 0... | (112267) | 112267                                                                         | 112277 | 112288 | 112299 | 112310 | 112321 | 112332 112343 |
|                                                     | (112032) | TTGCAGAACCCCGGGGAGAGTGCCGTTTTTCAAGAGTTGGAAGATTAGAGAATGCAGTTGTAGTATTAGAAAATGA   |        |        |        |        |        |               |
|                                                     | (29904)  | -----                                                                          |        |        |        |        |        |               |
|                                                     |          | Section 1460                                                                   |        |        |        |        |        |               |
| Autographa californica nucleopolyhedrovirus NC 0... | (112344) | 112344                                                                         | 112354 | 112365 | 112376 | 112387 | 112398 | 112409 112420 |
|                                                     | (112109) | ACAAAACGATTGTATCCCATATTAGATACGCCTCTTGATAATTTTATTGTCGCATTTCGTGAATCCGACGTATCCCA  |        |        |        |        |        |               |
|                                                     | (29904)  | -----                                                                          |        |        |        |        |        |               |
|                                                     |          | Section 1461                                                                   |        |        |        |        |        |               |
| Autographa californica nucleopolyhedrovirus NC 0... | (112421) | 112421                                                                         | 112431 | 112442 | 112453 | 112464 | 112475 | 112486 112497 |
|                                                     | (112186) | TGGCCTATTTTGTCAATACCGATTACAAATTAACACTAGAATGTGCCAGAATCAGAAGCGATTTACTTTACAAAAC   |        |        |        |        |        |               |
|                                                     | (29904)  | -----                                                                          |        |        |        |        |        |               |
|                                                     |          | Section 1462                                                                   |        |        |        |        |        |               |
| Autographa californica nucleopolyhedrovirus NC 0... | (112498) | 112498                                                                         | 112508 | 112519 | 112530 | 112541 | 112552 | 112563 112574 |
|                                                     | (112263) | AAAAACGAAGTCGCTATCAACAGGCCTAAGATATCGTCTTTTAAATTGCAATTGAACAACGTAATTTTAGACACTAT  |        |        |        |        |        |               |
|                                                     | (29904)  | -----                                                                          |        |        |        |        |        |               |
|                                                     |          | Section 1463                                                                   |        |        |        |        |        |               |
| Autographa californica nucleopolyhedrovirus NC 0... | (112575) | 112575                                                                         | 112585 | 112596 | 112607 | 112618 | 112629 | 112640 112651 |
|                                                     | (112340) | AGAAACTATTGAATACGATTTACAAAATAAAGTTCTCACAATTACTGCACCTGTTCAAGATCAAGAACTAAGAAAAT  |        |        |        |        |        |               |
|                                                     | (29904)  | -----                                                                          |        |        |        |        |        |               |

|                                                     |          |                                                                                |        |        |        |        |        |               |
|-----------------------------------------------------|----------|--------------------------------------------------------------------------------|--------|--------|--------|--------|--------|---------------|
|                                                     |          | Section 1464                                                                   |        |        |        |        |        |               |
| Autographa californica nucleopolyhedrovirus NC 0... | (112652) | 112652                                                                         | 112662 | 112673 | 112684 | 112695 | 112706 | 112717 112728 |
|                                                     | (112417) | CCATTATTTATTTTAATATTTTAAATAGTGACAGTTGGGAAGTACCAAAGTATATGAAAAAATTGTTTGATGAAATG  |        |        |        |        |        |               |
|                                                     | (29904)  | -----                                                                          |        |        |        |        |        |               |
|                                                     |          | Section 1465                                                                   |        |        |        |        |        |               |
| Autographa californica nucleopolyhedrovirus NC 0... | (112729) | 112729                                                                         | 112739 | 112750 | 112761 | 112772 | 112783 | 112794 112805 |
|                                                     | (112494) | CAATTGGAACCTCCCGTCATTTTACCATTAGGTCTTTAGATTTGGTAAGGCTAGCACGTCGACATCATGTTTGCGTC  |        |        |        |        |        |               |
|                                                     | (29904)  | -----                                                                          |        |        |        |        |        |               |
|                                                     |          | Section 1466                                                                   |        |        |        |        |        |               |
| Autographa californica nucleopolyhedrovirus NC 0... | (112806) | 112806                                                                         | 112816 | 112827 | 112838 | 112849 | 112860 | 112871 112882 |
|                                                     | (112571) | GTTGACCTCAGAGCAAAAGCTGTTATTAAAAAATATAAATTTAACAATTATGTGAAAACGATCGAGTTGAGTCAAG   |        |        |        |        |        |               |
|                                                     | (29904)  | -----                                                                          |        |        |        |        |        |               |
|                                                     |          | Section 1467                                                                   |        |        |        |        |        |               |
| Autographa californica nucleopolyhedrovirus NC 0... | (112883) | 112883                                                                         | 112893 | 112904 | 112915 | 112926 | 112937 | 112948 112959 |
|                                                     | (112648) | CGCAGTTGGCTCATTTGGCGTTCAAACAAAGATATTCAGCCAAAACCTTTGGATCGTGCAGAAATTTTACGTGTCGAA |        |        |        |        |        |               |
|                                                     | (29904)  | -----                                                                          |        |        |        |        |        |               |
|                                                     |          | Section 1468                                                                   |        |        |        |        |        |               |
| Autographa californica nucleopolyhedrovirus NC 0... | (112960) | 112960                                                                         | 112970 | 112981 | 112992 | 113003 | 113014 | 113025 113036 |
|                                                     | (112725) | AAGGCCACCAGGGGACAAAGCAAAAATGAGCTGTGGACGCTATTGCGTTTGGATCGCAACACAGCGTCTGCATCGTC  |        |        |        |        |        |               |
|                                                     | (29904)  | -----                                                                          |        |        |        |        |        |               |
|                                                     |          | Section 1469                                                                   |        |        |        |        |        |               |
| Autographa californica nucleopolyhedrovirus NC 0... | (113037) | 113037                                                                         | 113047 | 113058 | 113069 | 113080 | 113091 | 113102 113113 |
|                                                     | (112802) | CAACTCGTCCGGCAACATGTTACAACGACCAGCGCTTTTGTGTTGGAAACGCGCAAGAAAGTCACGTCAAAGAAACCA |        |        |        |        |        |               |
|                                                     | (29904)  | -----                                                                          |        |        |        |        |        |               |
|                                                     |          | Section 1470                                                                   |        |        |        |        |        |               |
| Autographa californica nucleopolyhedrovirus NC 0... | (113114) | 113114                                                                         | 113124 | 113135 | 113146 | 113157 | 113168 | 113179 113190 |
|                                                     | (112879) | ACGGCATCATGTTAGACCACATGCGCGAAATCATAGAAAGTAAATTTATGAGCGCGGTCGTTGAAACGGTTTTGGAT  |        |        |        |        |        |               |
|                                                     | (29904)  | -----                                                                          |        |        |        |        |        |               |

## SARS-CoV-2 &amp; Autographa californica nucleopolyhedrovirus.apr

|                                                     |          |                                                                                                         |        |        |        |        |        |               |
|-----------------------------------------------------|----------|---------------------------------------------------------------------------------------------------------|--------|--------|--------|--------|--------|---------------|
|                                                     |          | Section 1471                                                                                            |        |        |        |        |        |               |
| Autographa californica nucleopolyhedrovirus NC 0... | (113191) | 113191                                                                                                  | 113201 | 113212 | 113223 | 113234 | 113245 | 113256 113267 |
|                                                     | (112956) | TGC GG CAT GTT CTT TAG CCC CT TGG GTT GCA CGC CGC TTC GCC CG ATG CGT ATTTT TCT C TC GCC GAC GGA ACG TG  |        |        |        |        |        |               |
|                                                     | (29904)  | -----                                                                                                   |        |        |        |        |        |               |
|                                                     |          | Section 1472                                                                                            |        |        |        |        |        |               |
| Autographa californica nucleopolyhedrovirus NC 0... | (113268) | 113268                                                                                                  | 113278 | 113289 | 113300 | 113311 | 113322 | 113333 113344 |
|                                                     | (113033) | GAT CCC AGT GGA AATA AAAT GT CCG TACA ATT ACC GAG ACAC GAC CGT GGA GC AG ATG CGT GT C GA GTT GGG GA ACG |        |        |        |        |        |               |
|                                                     | (29904)  | -----                                                                                                   |        |        |        |        |        |               |
|                                                     |          | Section 1473                                                                                            |        |        |        |        |        |               |
| Autographa californica nucleopolyhedrovirus NC 0... | (113345) | 113345                                                                                                  | 113355 | 113366 | 113377 | 113388 | 113399 | 113410 113421 |
|                                                     | (113110) | GCA ATC GCA AGT ATC GCG TGA AAC ACAC CGC GCT GTT GGT TAACA AGAA AGG CAC GCC CAG TTC GAA ATGGT CAAA      |        |        |        |        |        |               |
|                                                     | (29904)  | -----                                                                                                   |        |        |        |        |        |               |
|                                                     |          | Section 1474                                                                                            |        |        |        |        |        |               |
| Autographa californica nucleopolyhedrovirus NC 0... | (113422) | 113422                                                                                                  | 113432 | 113443 | 113454 | 113465 | 113476 | 113487 113498 |
|                                                     | (113187) | ACG GAT GCG CAT TACA AGCAA ATG CAA CGG CAG ATGT ATGT GAT GAAC GCG CCT ATGG GCT TTTT AC GTGGT CAA ATT    |        |        |        |        |        |               |
|                                                     | (29904)  | -----                                                                                                   |        |        |        |        |        |               |
|                                                     |          | Section 1475                                                                                            |        |        |        |        |        |               |
| Autographa californica nucleopolyhedrovirus NC 0... | (113499) | 113499                                                                                                  | 113509 | 113520 | 113531 | 113542 | 113553 | 113564 113575 |
|                                                     | (113264) | CAA ACAA AATTT GGT GGT GGT TTT CTGT GCC GCG CAG CAA ACGT TCT GCA ACAA AGA ACT GTCT AC GGA AAA ACA CG    |        |        |        |        |        |               |
|                                                     | (29904)  | -----                                                                                                   |        |        |        |        |        |               |
|                                                     |          | Section 1476                                                                                            |        |        |        |        |        |               |
| Autographa californica nucleopolyhedrovirus NC 0... | (113576) | 113576                                                                                                  | 113586 | 113597 | 113608 | 113619 | 113630 | 113641 113652 |
|                                                     | (113341) | CGT AC GTGG C G TTT GCC GTG GAA AACT CCA ACT GCG CGC GCT ACC AAT GCG CCG ACA AGC GAC GGT TTT CATT CAAA  |        |        |        |        |        |               |
|                                                     | (29904)  | -----                                                                                                   |        |        |        |        |        |               |
|                                                     |          | Section 1477                                                                                            |        |        |        |        |        |               |
| Autographa californica nucleopolyhedrovirus NC 0... | (113653) | 113653                                                                                                  | 113663 | 113674 | 113685 | 113696 | 113707 | 113718 113729 |
|                                                     | (113418) | ACG CAC AGCT GCA ATC ACA ACT ATA GTGGT CAAG AAAT CGAT GCT ATGGT CGAT CGC GGA ATAT ATTT AGATT ATGG       |        |        |        |        |        |               |
|                                                     | (29904)  | -----                                                                                                   |        |        |        |        |        |               |

## SARS-CoV-2 &amp; Autographa californica nucleopolyhedrovirus.apr

|                                                     |          |                                                                               |        |        |        |        |        |               |
|-----------------------------------------------------|----------|-------------------------------------------------------------------------------|--------|--------|--------|--------|--------|---------------|
|                                                     |          | Section 1478                                                                  |        |        |        |        |        |               |
| Autographa californica nucleopolyhedrovirus NC 0... | (113730) | 113730                                                                        | 113740 | 113751 | 113762 | 113773 | 113784 | 113795 113806 |
|                                                     | (113495) | ACATTTAAAATGTGCGTACTGTGATTTTAGCTCAGACAGTCGGGAAACGTGCGATTCTGTTTTAAACGCGAGCACA  |        |        |        |        |        |               |
|                                                     | (29904)  | -----                                                                         |        |        |        |        |        |               |
|                                                     |          | Section 1479                                                                  |        |        |        |        |        |               |
| Autographa californica nucleopolyhedrovirus NC 0... | (113807) | 113807                                                                        | 113817 | 113828 | 113839 | 113850 | 113861 | 113872 113883 |
|                                                     | (113572) | CCAACTGCAAAAGTTTTAACTTGAAACATAAAACTTTGACAATCCTACATACTTTGATTATGTTAAAAGATTGCAA  |        |        |        |        |        |               |
|                                                     | (29904)  | -----                                                                         |        |        |        |        |        |               |
|                                                     |          | Section 1480                                                                  |        |        |        |        |        |               |
| Autographa californica nucleopolyhedrovirus NC 0... | (113884) | 113884                                                                        | 113894 | 113905 | 113916 | 113927 | 113938 | 113949 113960 |
|                                                     | (113649) | AGTTTGCTAAAGAGTCACCACTTTAGAAACGACGCTAAACACTTGCCTATTTTGGTTACTATTTAACTCATAACAGG |        |        |        |        |        |               |
|                                                     | (29904)  | -----                                                                         |        |        |        |        |        |               |
|                                                     |          | Section 1481                                                                  |        |        |        |        |        |               |
| Autographa californica nucleopolyhedrovirus NC 0... | (113961) | 113961                                                                        | 113971 | 113982 | 113993 | 114004 | 114015 | 114026 114037 |
|                                                     | (113726) | AACCCTGAAGACCTTTTGCTGCGGATCGCAAACTCGTCGCCACCAAACACGATCATTTAAACGACTGTGTATATT   |        |        |        |        |        |               |
|                                                     | (29904)  | -----                                                                         |        |        |        |        |        |               |
|                                                     |          | Section 1482                                                                  |        |        |        |        |        |               |
| Autographa californica nucleopolyhedrovirus NC 0... | (114038) | 114038                                                                        | 114048 | 114059 | 114070 | 114081 | 114092 | 114103 114114 |
|                                                     | (113803) | ATTTGGAAATAAAATAAACCTTTATATTATATATAATTCCTTTATTTATACATTTGTTTATACAATTTTATTTACGA |        |        |        |        |        |               |
|                                                     | (29904)  | -----                                                                         |        |        |        |        |        |               |
|                                                     |          | Section 1483                                                                  |        |        |        |        |        |               |
| Autographa californica nucleopolyhedrovirus NC 0... | (114115) | 114115                                                                        | 114125 | 114136 | 114147 | 114158 | 114169 | 114180 114191 |
|                                                     | (113880) | CAAATATTGACTCGTTGTTTCAGAAAGTTTAATAAGCTTGTCATTTCTTCGGCTTGCAAAGGGCTGCCAACGCGTTC |        |        |        |        |        |               |
|                                                     | (29904)  | -----                                                                         |        |        |        |        |        |               |
|                                                     |          | Section 1484                                                                  |        |        |        |        |        |               |
| Autographa californica nucleopolyhedrovirus NC 0... | (114192) | 114192                                                                        | 114202 | 114213 | 114224 | 114235 | 114246 | 114257 114268 |
|                                                     | (113957) | GTTTTGAATGCGCGTAATCCGGTTTACGGTATTGTTGGCGCGAACAATAAACTCCTCAACTGGCAAATTAACAATTT |        |        |        |        |        |               |
|                                                     | (29904)  | -----                                                                         |        |        |        |        |        |               |

## SARS-CoV-2 &amp; Autographa californica nucleopolyhedrovirus.apr

|                                                     |          |                                                                                |        |        |        |        |        |               |
|-----------------------------------------------------|----------|--------------------------------------------------------------------------------|--------|--------|--------|--------|--------|---------------|
|                                                     |          | Section 1485                                                                   |        |        |        |        |        |               |
| Autographa californica nucleopolyhedrovirus NC 0... | (114269) | 114269                                                                         | 114279 | 114290 | 114301 | 114312 | 114323 | 114334 114345 |
|                                                     | (114034) | TGTTTGCGTACTCATTGTGCACTGCGGCCAGGTTTGTAGAAATGTTTTCGGGAAAAATGGCAATTCTATTAAATTTG  |        |        |        |        |        |               |
|                                                     | (29904)  | -----                                                                          |        |        |        |        |        |               |
|                                                     |          | Section 1486                                                                   |        |        |        |        |        |               |
| Autographa californica nucleopolyhedrovirus NC 0... | (114346) | 114346                                                                         | 114356 | 114367 | 114378 | 114389 | 114400 | 114411 114422 |
|                                                     | (114111) | ACATGTTTTTTGATTGTATACATAGTTTTGATATTCTTCCAGCGTAGGATATTTGTTTAAACTCTTGACGCATTCAAT |        |        |        |        |        |               |
|                                                     | (29904)  | -----                                                                          |        |        |        |        |        |               |
|                                                     |          | Section 1487                                                                   |        |        |        |        |        |               |
| Autographa californica nucleopolyhedrovirus NC 0... | (114423) | 114423                                                                         | 114433 | 114444 | 114455 | 114466 | 114477 | 114488 114499 |
|                                                     | (114188) | GTACAATTTGTGCACTGACAAAATTCTGTTAAATCCAAACGAGAACATTTCTCAAAAGTTATTTCTTGACCGTTGA   |        |        |        |        |        |               |
|                                                     | (29904)  | -----                                                                          |        |        |        |        |        |               |
|                                                     |          | Section 1488                                                                   |        |        |        |        |        |               |
| Autographa californica nucleopolyhedrovirus NC 0... | (114500) | 114500                                                                         | 114510 | 114521 | 114532 | 114543 | 114554 | 114565 114576 |
|                                                     | (114265) | AATGTACACTTTGCAATTGTTTCAATAAACTGTCGTAAAAAGTTTTTCCTTCTTCAAGCACAAACGCGGGGCGCATC  |        |        |        |        |        |               |
|                                                     | (29904)  | -----                                                                          |        |        |        |        |        |               |
|                                                     |          | Section 1489                                                                   |        |        |        |        |        |               |
| Autographa californica nucleopolyhedrovirus NC 0... | (114577) | 114577                                                                         | 114587 | 114598 | 114609 | 114620 | 114631 | 114642 114653 |
|                                                     | (114342) | GTGTTATCTACAACGCTTATGTACTTGTCAAAATCTTCAATTATATGATAGAAATACAAATATCTCTCCGCGTTTAT  |        |        |        |        |        |               |
|                                                     | (29904)  | -----                                                                          |        |        |        |        |        |               |
|                                                     |          | Section 1490                                                                   |        |        |        |        |        |               |
| Autographa californica nucleopolyhedrovirus NC 0... | (114654) | 114654                                                                         | 114664 | 114675 | 114686 | 114697 | 114708 | 114719 114730 |
|                                                     | (114419) | GGACGTGTCGTTTAAACATGTTTCGTCAACAACCTCCGTTATGATTTACTTTCAAAAATTTCAAATCTTGCAAAGCGT |        |        |        |        |        |               |
|                                                     | (29904)  | -----                                                                          |        |        |        |        |        |               |
|                                                     |          | Section 1491                                                                   |        |        |        |        |        |               |
| Autographa californica nucleopolyhedrovirus NC 0... | (114731) | 114731                                                                         | 114741 | 114752 | 114763 | 114774 | 114785 | 114796 114807 |
|                                                     | (114496) | CCGCGTTGGTCAACTTGTTGATAATAAATTTGTCTTTGCATTCAAACGCTCTGTTTGCAATCCACTCCACAGCGTCC  |        |        |        |        |        |               |
|                                                     | (29904)  | -----                                                                          |        |        |        |        |        |               |

## SARS-CoV-2 &amp; Autographa californica nucleopolyhedrovirus.apr

|                                                     |          |                                                                               |        |        |        |        |        |               |
|-----------------------------------------------------|----------|-------------------------------------------------------------------------------|--------|--------|--------|--------|--------|---------------|
|                                                     |          | Section 1492                                                                  |        |        |        |        |        |               |
| Autographa californica nucleopolyhedrovirus NC 0... | (114808) | 114808                                                                        | 114818 | 114829 | 114840 | 114851 | 114862 | 114873 114884 |
|                                                     | (114573) | AAAACGGACATGCGTTTAAACATGTTGATACGTTTTTAGACAATACGCTCGTTTTTTTACCGCCTCAACGTTACGTC |        |        |        |        |        |               |
| SARS-CoV-2 NC_045512.2                              | (29904)  | -----                                                                         |        |        |        |        |        |               |
|                                                     |          | Section 1493                                                                  |        |        |        |        |        |               |
| Autographa californica nucleopolyhedrovirus NC 0... | (114885) | 114885                                                                        | 114895 | 114906 | 114917 | 114928 | 114939 | 114950 114961 |
|                                                     | (114650) | CGTGTAGTCGCACCATTGCAGGATTTGCAACATGTCCTCGGCAAAATGCGCGAACTGCCGCAGCTTTTCCTTTCCAA |        |        |        |        |        |               |
| SARS-CoV-2 NC_045512.2                              | (29904)  | -----                                                                         |        |        |        |        |        |               |
|                                                     |          | Section 1494                                                                  |        |        |        |        |        |               |
| Autographa californica nucleopolyhedrovirus NC 0... | (114962) | 114962                                                                        | 114972 | 114983 | 114994 | 115005 | 115016 | 115027 115038 |
|                                                     | (114727) | AATGTTGATTGTCGTGTTTAAAAAGCAACGTTGAAATTTCCGAGACATACCACAAAGCCGTGGGCAATTTTACTTTG |        |        |        |        |        |               |
| SARS-CoV-2 NC_045512.2                              | (29904)  | -----                                                                         |        |        |        |        |        |               |
|                                                     |          | Section 1495                                                                  |        |        |        |        |        |               |
| Autographa californica nucleopolyhedrovirus NC 0... | (115039) | 115039                                                                        | 115049 | 115060 | 115071 | 115082 | 115093 | 115104 115115 |
|                                                     | (114804) | ATCAGCGGCTCCATAGCCAGGTTGCTGAACCCGATCATGCATTCCGTGTTGTTAATGCGGTAAATGACATAGCGTTT |        |        |        |        |        |               |
| SARS-CoV-2 NC_045512.2                              | (29904)  | -----                                                                         |        |        |        |        |        |               |
|                                                     |          | Section 1496                                                                  |        |        |        |        |        |               |
| Autographa californica nucleopolyhedrovirus NC 0... | (115116) | 115116                                                                        | 115126 | 115137 | 115148 | 115159 | 115170 | 115181 115192 |
|                                                     | (114881) | AAAGTAGTCCTTTACATTATCGTCAATGTATTCTGCGTCGTTTATGTGCTTGTACAGCAAATAGTACATAAGGCCCG |        |        |        |        |        |               |
| SARS-CoV-2 NC_045512.2                              | (29904)  | -----                                                                         |        |        |        |        |        |               |
|                                                     |          | Section 1497                                                                  |        |        |        |        |        |               |
| Autographa californica nucleopolyhedrovirus NC 0... | (115193) | 115193                                                                        | 115203 | 115214 | 115225 | 115236 | 115247 | 115258 115269 |
|                                                     | (114958) | CGTTAAACGCGACCTTTTTAGCGTCAAAATACGTGCACGCCAACACGTAATCGTTGTATTGCTCGAATTGCTCGTTG |        |        |        |        |        |               |
| SARS-CoV-2 NC_045512.2                              | (29904)  | -----                                                                         |        |        |        |        |        |               |
|                                                     |          | Section 1498                                                                  |        |        |        |        |        |               |
| Autographa californica nucleopolyhedrovirus NC 0... | (115270) | 115270                                                                        | 115280 | 115291 | 115302 | 115313 | 115324 | 115335 115346 |
|                                                     | (115035) | GGCACTATGGCGCCCGTAAAGGGCGTCTGCTGCGCGGTGACAAACGCGTTCCATGCTGAATCAACTGCTTCAAAC   |        |        |        |        |        |               |
| SARS-CoV-2 NC_045512.2                              | (29904)  | -----                                                                         |        |        |        |        |        |               |

## SARS-CoV-2 &amp; Autographa californica nucleopolyhedrovirus.apr

|                                                     |          |                                                                                |        |        |        |        |        |               |
|-----------------------------------------------------|----------|--------------------------------------------------------------------------------|--------|--------|--------|--------|--------|---------------|
|                                                     |          | Section 1499                                                                   |        |        |        |        |        |               |
| Autographa californica nucleopolyhedrovirus NC 0... | (115347) | 115347                                                                         | 115357 | 115368 | 115379 | 115390 | 115401 | 115412 115423 |
|                                                     | (115112) | TTCCAAATTATAACAATATTCAATTGAATTTTAAATCTCTTATTTTGGCTCCATAAAAGAGGAAACTCGAGTCGGC   |        |        |        |        |        |               |
| SARS-CoV-2 NC_045512.2                              | (29904)  | -----                                                                          |        |        |        |        |        |               |
|                                                     |          | Section 1500                                                                   |        |        |        |        |        |               |
| Autographa californica nucleopolyhedrovirus NC 0... | (115424) | 115424                                                                         | 115434 | 115445 | 115456 | 115467 | 115478 | 115489 115500 |
|                                                     | (115189) | TTTTAAACTTGGTCAAACCTGCCCTGAATTGTTCAAACAAGTTGTAATGTGTTAACAATATGGCCGGCACACCGCTA  |        |        |        |        |        |               |
| SARS-CoV-2 NC_045512.2                              | (29904)  | -----                                                                          |        |        |        |        |        |               |
|                                                     |          | Section 1501                                                                   |        |        |        |        |        |               |
| Autographa californica nucleopolyhedrovirus NC 0... | (115501) | 115501                                                                         | 115511 | 115522 | 115533 | 115544 | 115555 | 115566 115577 |
|                                                     | (115266) | TCGTTGGCTAAAATACAATCGGGGAATCGAATATTTTCTACGTTGCTGTAATCGTACGCTTCGTCGTCGTTGGC     |        |        |        |        |        |               |
| SARS-CoV-2 NC_045512.2                              | (29904)  | -----                                                                          |        |        |        |        |        |               |
|                                                     |          | Section 1502                                                                   |        |        |        |        |        |               |
| Autographa californica nucleopolyhedrovirus NC 0... | (115578) | 115578                                                                         | 115588 | 115599 | 115610 | 115621 | 115632 | 115643 115654 |
|                                                     | (115343) | AACAAACATCGTCGGTTTCGGCGTTAACGCTCGCTAACTTGTTCTGATAGTGTAATTTTTTCATTACATCAAAAGCGT |        |        |        |        |        |               |
| SARS-CoV-2 NC_045512.2                              | (29904)  | -----                                                                          |        |        |        |        |        |               |
|                                                     |          | Section 1503                                                                   |        |        |        |        |        |               |
| Autographa californica nucleopolyhedrovirus NC 0... | (115655) | 115655                                                                         | 115665 | 115676 | 115687 | 115698 | 115709 | 115720 115731 |
|                                                     | (115420) | ATGACTTGTTGCGATTGTGCAAATAATTTATGGCCGTGCTAATGGTGCTGTCGATAATTTTATCAAAATTGAGAACA  |        |        |        |        |        |               |
| SARS-CoV-2 NC_045512.2                              | (29904)  | -----                                                                          |        |        |        |        |        |               |
|                                                     |          | Section 1504                                                                   |        |        |        |        |        |               |
| Autographa californica nucleopolyhedrovirus NC 0... | (115732) | 115732                                                                         | 115742 | 115753 | 115764 | 115775 | 115786 | 115797 115808 |
|                                                     | (115497) | TCGGCGTTATACAACGTTTTATAAAATTCTGTTGACTTGAACGTGTTTACAACTCATTTTTATTTTAACTCTGGTC   |        |        |        |        |        |               |
| SARS-CoV-2 NC_045512.2                              | (29904)  | -----                                                                          |        |        |        |        |        |               |
|                                                     |          | Section 1505                                                                   |        |        |        |        |        |               |
| Autographa californica nucleopolyhedrovirus NC 0... | (115809) | 115809                                                                         | 115819 | 115830 | 115841 | 115852 | 115863 | 115874 115885 |
|                                                     | (115574) | AAAATTCATACTAGAATTGTTAGTTTGTGATTTCGCTGAATAGCCGCTGGCGGAGACGCTTCAGCTTGTCCACCT    |        |        |        |        |        |               |
| SARS-CoV-2 NC_045512.2                              | (29904)  | -----                                                                          |        |        |        |        |        |               |

## SARS-CoV-2 &amp; Autographa californica nucleopolyhedrovirus.apr

|                                                     |          |                                                                                   |        |        |        |        |        |               |
|-----------------------------------------------------|----------|-----------------------------------------------------------------------------------|--------|--------|--------|--------|--------|---------------|
|                                                     |          | Section 1506                                                                      |        |        |        |        |        |               |
| Autographa californica nucleopolyhedrovirus NC 0... | (115886) | 115886                                                                            | 115896 | 115907 | 115918 | 115929 | 115940 | 115951 115962 |
|                                                     | (115651) | CGTTTAAACACGTTGGCGTCCGTTCGGCATGGAATTGATAAATTTGAACCGAACAAAAGACAGCAGTTCATCTTTTTTC   |        |        |        |        |        |               |
|                                                     | (29904)  | -----                                                                             |        |        |        |        |        |               |
|                                                     |          | Section 1507                                                                      |        |        |        |        |        |               |
| Autographa californica nucleopolyhedrovirus NC 0... | (115963) | 115963                                                                            | 115973 | 115984 | 115995 | 116006 | 116017 | 116028 116039 |
|                                                     | (115728) | GATATAAAATTTTCGGTTGTAATGATATCGTAGTTAAATTCCTTTGGTTAAATTGACCCATTTCGACCATTTTCATCGTT  |        |        |        |        |        |               |
|                                                     | (29904)  | -----                                                                             |        |        |        |        |        |               |
|                                                     |          | Section 1508                                                                      |        |        |        |        |        |               |
| Autographa californica nucleopolyhedrovirus NC 0... | (116040) | 116040                                                                            | 116050 | 116061 | 116072 | 116083 | 116094 | 116105 116116 |
|                                                     | (115805) | GCGATAAATCTTGCGAGTCCGAGTTGTTGACAAACGCCGAGGCAACGGACAAATCAATCTGTTCCGTGTTATTATTGA    |        |        |        |        |        |               |
|                                                     | (29904)  | -----                                                                             |        |        |        |        |        |               |
|                                                     |          | Section 1509                                                                      |        |        |        |        |        |               |
| Autographa californica nucleopolyhedrovirus NC 0... | (116117) | 116117                                                                            | 116127 | 116138 | 116149 | 116160 | 116171 | 116182 116193 |
|                                                     | (115882) | TGGCATAAAACACAATGCGTTCGAAACTAAACGGTTTTTCGTTTAGCAAATTTTTCGAAACGTTTGCCCTCATTTTTG    |        |        |        |        |        |               |
|                                                     | (29904)  | -----                                                                             |        |        |        |        |        |               |
|                                                     |          | Section 1510                                                                      |        |        |        |        |        |               |
| Autographa californica nucleopolyhedrovirus NC 0... | (116194) | 116194                                                                            | 116204 | 116215 | 116226 | 116237 | 116248 | 116259 116270 |
|                                                     | (115959) | GAAATTTGGCCGTCGGTCACCATGTACAAAAGTTTCAACTTGCCGTCGAGCAAGTTTATATTCTTGTGAATCCACTT     |        |        |        |        |        |               |
|                                                     | (29904)  | -----                                                                             |        |        |        |        |        |               |
|                                                     |          | Section 1511                                                                      |        |        |        |        |        |               |
| Autographa californica nucleopolyhedrovirus NC 0... | (116271) | 116271                                                                            | 116281 | 116292 | 116303 | 116314 | 116325 | 116336 116347 |
|                                                     | (116036) | TATGAATTCGCTGGGCCCTGGTGTGAGTACCCCTCGCCATTGCGGCGCAAATAACGACTCTTGACGTCTCCGATTTCTT   |        |        |        |        |        |               |
|                                                     | (29904)  | -----                                                                             |        |        |        |        |        |               |
|                                                     |          | Section 1512                                                                      |        |        |        |        |        |               |
| Autographa californica nucleopolyhedrovirus NC 0... | (116348) | 116348                                                                            | 116358 | 116369 | 116380 | 116391 | 116402 | 116413 116424 |
|                                                     | (116113) | TTTGGCGGCAATAAGCACTCCAATGCAAATACAAAACCTTTGTGCGCAACTACTGATGTTTTTCGATTTTCATTCTGAAAT |        |        |        |        |        |               |
|                                                     | (29904)  | -----                                                                             |        |        |        |        |        |               |



## SARS-CoV-2 &amp; Autographa californica nucleopolyhedrovirus.apr

|                                                     |          |                                                                                 |        |        |        |        |        |               |
|-----------------------------------------------------|----------|---------------------------------------------------------------------------------|--------|--------|--------|--------|--------|---------------|
|                                                     |          | Section 1513                                                                    |        |        |        |        |        |               |
| Autographa californica nucleopolyhedrovirus NC 0... | (116425) | 116425                                                                          | 116435 | 116446 | 116457 | 116468 | 116479 | 116490 116501 |
|                                                     | (116190) | TGTTCTAAAGTTTGTAAACGCGTTCTTGTTAAAGTAATAGTCCGAGTTTGTGCGACAAGGAATCGTCGGTGGCGTACAC |        |        |        |        |        |               |
|                                                     | (29904)  | -----                                                                           |        |        |        |        |        |               |
|                                                     |          | Section 1514                                                                    |        |        |        |        |        |               |
| Autographa californica nucleopolyhedrovirus NC 0... | (116502) | 116502                                                                          | 116512 | 116523 | 116534 | 116545 | 116556 | 116567 116578 |
|                                                     | (116267) | GTAGTAGTTAATCATCTTGTTGATTGATATTTAATTTTGCGACGGATTTTATATACACGAGCGGAGCGGTACGTT     |        |        |        |        |        |               |
|                                                     | (29904)  | -----                                                                           |        |        |        |        |        |               |
|                                                     |          | Section 1515                                                                    |        |        |        |        |        |               |
| Autographa californica nucleopolyhedrovirus NC 0... | (116579) | 116579                                                                          | 116589 | 116600 | 116611 | 116622 | 116633 | 116644 116655 |
|                                                     | (116344) | TCTGTAACATGAGTGATCGTGTGTGTTATCTCTGGCAGCGCGATAGTGGTCGCGAAAATTACACGCGCGTCGTAA     |        |        |        |        |        |               |
|                                                     | (29904)  | -----                                                                           |        |        |        |        |        |               |
|                                                     |          | Section 1516                                                                    |        |        |        |        |        |               |
| Autographa californica nucleopolyhedrovirus NC 0... | (116656) | 116656                                                                          | 116666 | 116677 | 116688 | 116699 | 116710 | 116721 116732 |
|                                                     | (116421) | CGTGAACGTTTATATTATAAATATTCAACGTTGCTTGTATTAAGTGAGCATTTGAGCTTTACCATTGCAAAATGTGT   |        |        |        |        |        |               |
|                                                     | (29904)  | -----                                                                           |        |        |        |        |        |               |
|                                                     |          | Section 1517                                                                    |        |        |        |        |        |               |
| Autographa californica nucleopolyhedrovirus NC 0... | (116733) | 116733                                                                          | 116743 | 116754 | 116765 | 116776 | 116787 | 116798 116809 |
|                                                     | (116498) | GTAATTTTTCGGTAGAAATCGACGTGTCCAGACGATTATTCGAGATTGTCAGGTGGACAAACAAACCAGAGAGTT     |        |        |        |        |        |               |
|                                                     | (29904)  | -----                                                                           |        |        |        |        |        |               |
|                                                     |          | Section 1518                                                                    |        |        |        |        |        |               |
| Autographa californica nucleopolyhedrovirus NC 0... | (116810) | 116810                                                                          | 116820 | 116831 | 116842 | 116853 | 116864 | 116875 116886 |
|                                                     | (116575) | GGTGATACATTAACAAGATTATGAACACGCAATTGACAAAACCGTTCTCATGATGTTTAACATTTGGGTCTATAC     |        |        |        |        |        |               |
|                                                     | (29904)  | -----                                                                           |        |        |        |        |        |               |
|                                                     |          | Section 1519                                                                    |        |        |        |        |        |               |
| Autographa californica nucleopolyhedrovirus NC 0... | (116887) | 116887                                                                          | 116897 | 116908 | 116919 | 116930 | 116941 | 116952 116963 |
|                                                     | (116652) | GAAGCGTTACGCGCAAGAACAACAATTTGCGCGACAGAAATAAATCAAAAGTCGATGAACAATTTGATCAACTAGAA   |        |        |        |        |        |               |
|                                                     | (29904)  | -----                                                                           |        |        |        |        |        |               |

## SARS-CoV-2 &amp; Autographa californica nucleopolyhedrovirus.apr

|                                                     |          |                                                                                 |                        |                        |                        |                        |                        |                                               |
|-----------------------------------------------------|----------|---------------------------------------------------------------------------------|------------------------|------------------------|------------------------|------------------------|------------------------|-----------------------------------------------|
|                                                     |          | Section 1520                                                                    |                        |                        |                        |                        |                        |                                               |
| Autographa californica nucleopolyhedrovirus NC 0... | (116964) | <a href="#">116964</a>                                                          | <a href="#">116974</a> | <a href="#">116985</a> | <a href="#">116996</a> | <a href="#">117007</a> | <a href="#">117018</a> | <a href="#">117029</a> <a href="#">117040</a> |
|                                                     | (116729) | CGCGATTACAGCGATCAAATGGATGGATTCCACGATAGCATCAAGTATTTTAAAGATGAACACTATTCGGTAAGTTG   |                        |                        |                        |                        |                        |                                               |
|                                                     | (29904)  | -----                                                                           |                        |                        |                        |                        |                        |                                               |
|                                                     |          | Section 1521                                                                    |                        |                        |                        |                        |                        |                                               |
| Autographa californica nucleopolyhedrovirus NC 0... | (117041) | <a href="#">117041</a>                                                          | <a href="#">117051</a> | <a href="#">117062</a> | <a href="#">117073</a> | <a href="#">117084</a> | <a href="#">117095</a> | <a href="#">117106</a> <a href="#">117117</a> |
|                                                     | (116806) | CCAAAATGGCAGCGTGTTGAAAAGCAAGTTTGCTAAAATTTTAAAGAGTCATGATTATACCGATAAAAAGTCTATTG   |                        |                        |                        |                        |                        |                                               |
|                                                     | (29904)  | -----                                                                           |                        |                        |                        |                        |                        |                                               |
|                                                     |          | Section 1522                                                                    |                        |                        |                        |                        |                        |                                               |
| Autographa californica nucleopolyhedrovirus NC 0... | (117118) | <a href="#">117118</a>                                                          | <a href="#">117128</a> | <a href="#">117139</a> | <a href="#">117150</a> | <a href="#">117161</a> | <a href="#">117172</a> | <a href="#">117183</a> <a href="#">117194</a> |
|                                                     | (116883) | AAGCTTACGAGAAATACTGTTTGCCCAAATTGGTCGACGAACGCAACGACTACTACGTGGCGGTATGCGTGTTGAAG   |                        |                        |                        |                        |                        |                                               |
|                                                     | (29904)  | -----                                                                           |                        |                        |                        |                        |                        |                                               |
|                                                     |          | Section 1523                                                                    |                        |                        |                        |                        |                        |                                               |
| Autographa californica nucleopolyhedrovirus NC 0... | (117195) | <a href="#">117195</a>                                                          | <a href="#">117205</a> | <a href="#">117216</a> | <a href="#">117227</a> | <a href="#">117238</a> | <a href="#">117249</a> | <a href="#">117260</a> <a href="#">117271</a> |
|                                                     | (116960) | CCGGGATTTGAGAACGGCAGCAACCAAGTGCTATCTTTCGAGTACAACCCGATTGGTAACAAAGTTATTGTGCCGTT   |                        |                        |                        |                        |                        |                                               |
|                                                     | (29904)  | -----                                                                           |                        |                        |                        |                        |                        |                                               |
|                                                     |          | Section 1524                                                                    |                        |                        |                        |                        |                        |                                               |
| Autographa californica nucleopolyhedrovirus NC 0... | (117272) | <a href="#">117272</a>                                                          | <a href="#">117282</a> | <a href="#">117293</a> | <a href="#">117304</a> | <a href="#">117315</a> | <a href="#">117326</a> | <a href="#">117337</a> <a href="#">117348</a> |
|                                                     | (117037) | TGCTCACGAAATTAACGACACGGGACTTTACGAGTACGACGTCGTAGCTTACGTGGACAGTGTGCAGTTTGATGGCG   |                        |                        |                        |                        |                        |                                               |
|                                                     | (29904)  | -----                                                                           |                        |                        |                        |                        |                        |                                               |
|                                                     |          | Section 1525                                                                    |                        |                        |                        |                        |                        |                                               |
| Autographa californica nucleopolyhedrovirus NC 0... | (117349) | <a href="#">117349</a>                                                          | <a href="#">117359</a> | <a href="#">117370</a> | <a href="#">117381</a> | <a href="#">117392</a> | <a href="#">117403</a> | <a href="#">117414</a> <a href="#">117425</a> |
|                                                     | (117114) | AACAAATTTGAAGAGTTTGTGCAGAGTTTAATATTGCCGTCGTTCGTTCAAAAATTCGGAAAAGGTTTTATATTACAAC |                        |                        |                        |                        |                        |                                               |
|                                                     | (29904)  | -----                                                                           |                        |                        |                        |                        |                        |                                               |
|                                                     |          | Section 1526                                                                    |                        |                        |                        |                        |                        |                                               |
| Autographa californica nucleopolyhedrovirus NC 0... | (117426) | <a href="#">117426</a>                                                          | <a href="#">117436</a> | <a href="#">117447</a> | <a href="#">117458</a> | <a href="#">117469</a> | <a href="#">117480</a> | <a href="#">117491</a> <a href="#">117502</a> |
|                                                     | (117191) | GAAGCGTCGAAAAACAAAAGCATGATCTACAAGGCTTTAGAGTTTACTACAGAATCGAGCTGGGGCAAATCCGAAAA   |                        |                        |                        |                        |                        |                                               |
|                                                     | (29904)  | -----                                                                           |                        |                        |                        |                        |                        |                                               |

## SARS-CoV-2 &amp; Autographa californica nucleopolyhedrovirus.apr

|                                                     |          |                                                                                 |                        |                        |                        |                        |                        |                                               |
|-----------------------------------------------------|----------|---------------------------------------------------------------------------------|------------------------|------------------------|------------------------|------------------------|------------------------|-----------------------------------------------|
|                                                     |          | Section 1527                                                                    |                        |                        |                        |                        |                        |                                               |
| Autographa californica nucleopolyhedrovirus NC 0... | (117503) | <a href="#">117503</a>                                                          | <a href="#">117513</a> | <a href="#">117524</a> | <a href="#">117535</a> | <a href="#">117546</a> | <a href="#">117557</a> | <a href="#">117568</a> <a href="#">117579</a> |
|                                                     | (117268) | GTATAATTGGAAAATTTTTTGTAAACGGTTTTATTTATGATAAAAAATCAAAAGTGTTGTATGTTAAATTGCACAATG  |                        |                        |                        |                        |                        |                                               |
| SARS-CoV-2 NC_045512.2                              | (29904)  | -----                                                                           |                        |                        |                        |                        |                        |                                               |
|                                                     |          | Section 1528                                                                    |                        |                        |                        |                        |                        |                                               |
| Autographa californica nucleopolyhedrovirus NC 0... | (117580) | <a href="#">117580</a>                                                          | <a href="#">117590</a> | <a href="#">117601</a> | <a href="#">117612</a> | <a href="#">117623</a> | <a href="#">117634</a> | <a href="#">117645</a> <a href="#">117656</a> |
|                                                     | (117345) | TAACTAGTGCACCTCAACAAAAATGTAATATTAAACACAATTAAATAAATGTTAAATTTATTGCCTAATATTATTTT   |                        |                        |                        |                        |                        |                                               |
| SARS-CoV-2 NC_045512.2                              | (29904)  | -----                                                                           |                        |                        |                        |                        |                        |                                               |
|                                                     |          | Section 1529                                                                    |                        |                        |                        |                        |                        |                                               |
| Autographa californica nucleopolyhedrovirus NC 0... | (117657) | <a href="#">117657</a>                                                          | <a href="#">117667</a> | <a href="#">117678</a> | <a href="#">117689</a> | <a href="#">117700</a> | <a href="#">117711</a> | <a href="#">117722</a> <a href="#">117733</a> |
|                                                     | (117422) | GTCATTGCTTGTCAATTTATTAATTTGGATGATGTCATTTGTTTTTAAATTTGAACCTGGCTTTACGAGTAGAATTCTA |                        |                        |                        |                        |                        |                                               |
| SARS-CoV-2 NC_045512.2                              | (29904)  | -----                                                                           |                        |                        |                        |                        |                        |                                               |
|                                                     |          | Section 1530                                                                    |                        |                        |                        |                        |                        |                                               |
| Autographa californica nucleopolyhedrovirus NC 0... | (117734) | <a href="#">117734</a>                                                          | <a href="#">117744</a> | <a href="#">117755</a> | <a href="#">117766</a> | <a href="#">117777</a> | <a href="#">117788</a> | <a href="#">117799</a> <a href="#">117810</a> |
|                                                     | (117499) | CGCGTAAACACAATCAAGTATGAGTCATAATCTGATGTCATGTTTTGTACACGGCTCATAACCGAACTGGCTTTAC    |                        |                        |                        |                        |                        |                                               |
| SARS-CoV-2 NC_045512.2                              | (29904)  | -----                                                                           |                        |                        |                        |                        |                        |                                               |
|                                                     |          | Section 1531                                                                    |                        |                        |                        |                        |                        |                                               |
| Autographa californica nucleopolyhedrovirus NC 0... | (117811) | <a href="#">117811</a>                                                          | <a href="#">117821</a> | <a href="#">117832</a> | <a href="#">117843</a> | <a href="#">117854</a> | <a href="#">117865</a> | <a href="#">117876</a> <a href="#">117887</a> |
|                                                     | (117576) | GAGTAGAATTCTACTTGTAAATGCACGATCAGTGGATGATGTCATTTGTTTTTCAAATCGAGATGATGTCATGTTTTG  |                        |                        |                        |                        |                        |                                               |
| SARS-CoV-2 NC_045512.2                              | (29904)  | -----                                                                           |                        |                        |                        |                        |                        |                                               |
|                                                     |          | Section 1532                                                                    |                        |                        |                        |                        |                        |                                               |
| Autographa californica nucleopolyhedrovirus NC 0... | (117888) | <a href="#">117888</a>                                                          | <a href="#">117898</a> | <a href="#">117909</a> | <a href="#">117920</a> | <a href="#">117931</a> | <a href="#">117942</a> | <a href="#">117953</a> <a href="#">117964</a> |
|                                                     | (117653) | CACACGGCTCATAAACTCGCTTTACGAGTAGAATTCTACGTGTAACGCACGATCGATTGATGAGTCATTTGTTTTGC   |                        |                        |                        |                        |                        |                                               |
| SARS-CoV-2 NC_045512.2                              | (29904)  | -----                                                                           |                        |                        |                        |                        |                        |                                               |
|                                                     |          | Section 1533                                                                    |                        |                        |                        |                        |                        |                                               |
| Autographa californica nucleopolyhedrovirus NC 0... | (117965) | <a href="#">117965</a>                                                          | <a href="#">117975</a> | <a href="#">117986</a> | <a href="#">117997</a> | <a href="#">118008</a> | <a href="#">118019</a> | <a href="#">118030</a> <a href="#">118041</a> |
|                                                     | (117730) | AATATGATATCATACAATATGACTCATTTGTTTTTCAAACCGAACTTGATTACGGGTAGAATTCTACTTGTAAG      |                        |                        |                        |                        |                        |                                               |
| SARS-CoV-2 NC_045512.2                              | (29904)  | -----                                                                           |                        |                        |                        |                        |                        |                                               |

## SARS-CoV-2 &amp; Autographa californica nucleopolyhedrovirus.apr

|                                                     |          |                                                                                 |        |        |        |        |        |               |
|-----------------------------------------------------|----------|---------------------------------------------------------------------------------|--------|--------|--------|--------|--------|---------------|
|                                                     |          | Section 1534                                                                    |        |        |        |        |        |               |
| Autographa californica nucleopolyhedrovirus NC 0... | (118042) | 118042                                                                          | 118052 | 118063 | 118074 | 118085 | 118096 | 118107 118118 |
|                                                     | (117807) | CACAATCAAAAAGATGATGTCATTTGTTTTTCAAAACTGAACTCGCTTTACGAGTAGAATTCTACGTGTAAACACA    |        |        |        |        |        |               |
|                                                     | (29904)  | -----                                                                           |        |        |        |        |        |               |
|                                                     |          | Section 1535                                                                    |        |        |        |        |        |               |
| Autographa californica nucleopolyhedrovirus NC 0... | (118119) | 118119                                                                          | 118129 | 118140 | 118151 | 118162 | 118173 | 118184 118195 |
|                                                     | (117884) | ATCAAGAAATGATGTCATTTGTTATAAAAAATAAAAGCTGATGTCATGTTTTGCACATGGCTCATAACTAAACTCGCT  |        |        |        |        |        |               |
|                                                     | (29904)  | -----                                                                           |        |        |        |        |        |               |
|                                                     |          | Section 1536                                                                    |        |        |        |        |        |               |
| Autographa californica nucleopolyhedrovirus NC 0... | (118196) | 118196                                                                          | 118206 | 118217 | 118228 | 118239 | 118250 | 118261 118272 |
|                                                     | (117961) | TTACGGGTAGAATTCTACGCGTAAACATGATTGATAATTAAATAATTCATTTGCAAGCTATACGTTAAATCAAACG    |        |        |        |        |        |               |
|                                                     | (29904)  | -----                                                                           |        |        |        |        |        |               |
|                                                     |          | Section 1537                                                                    |        |        |        |        |        |               |
| Autographa californica nucleopolyhedrovirus NC 0... | (118273) | 118273                                                                          | 118283 | 118294 | 118305 | 118316 | 118327 | 118338 118349 |
|                                                     | (118038) | GACGTTATGGAATTGTATAATATTAAATATGCAATTGATCCAACAAATAAAATTGTAATAGAGCAAGTCGACAATGT   |        |        |        |        |        |               |
|                                                     | (29904)  | -----                                                                           |        |        |        |        |        |               |
|                                                     |          | Section 1538                                                                    |        |        |        |        |        |               |
| Autographa californica nucleopolyhedrovirus NC 0... | (118350) | 118350                                                                          | 118360 | 118371 | 118382 | 118393 | 118404 | 118415 118426 |
|                                                     | (118115) | GGACGCGTTTGTGCATATTTTAGAACCGGGTCAAGAAGTGTTTCGACGAAACGCTAAGCCAGTACCACCAATTTCTCTG |        |        |        |        |        |               |
|                                                     | (29904)  | -----                                                                           |        |        |        |        |        |               |
|                                                     |          | Section 1539                                                                    |        |        |        |        |        |               |
| Autographa californica nucleopolyhedrovirus NC 0... | (118427) | 118427                                                                          | 118437 | 118448 | 118459 | 118470 | 118481 | 118492 118503 |
|                                                     | (118192) | GCGTCGTTAGTTTCGATTATTTTCCCGCAACTCGTGTTAAACACAATAATTAGCGTTTTGAGCGAAGACGGCAGTTTG  |        |        |        |        |        |               |
|                                                     | (29904)  | -----                                                                           |        |        |        |        |        |               |
|                                                     |          | Section 1540                                                                    |        |        |        |        |        |               |
| Autographa californica nucleopolyhedrovirus NC 0... | (118504) | 118504                                                                          | 118514 | 118525 | 118536 | 118547 | 118558 | 118569 118580 |
|                                                     | (118269) | CTCACGTTGAAACTCGAAAACACTTGTTTTAATTTTCACGTGTGCAATAAACGCTTTGTGTTTGGCAATTTGCCAGC   |        |        |        |        |        |               |
|                                                     | (29904)  | -----                                                                           |        |        |        |        |        |               |

## SARS-CoV-2 &amp; Autographa californica nucleopolyhedrovirus.apr

|                                                     |          |                                                                               |        |        |        |        |        |               |
|-----------------------------------------------------|----------|-------------------------------------------------------------------------------|--------|--------|--------|--------|--------|---------------|
|                                                     |          | Section 1541                                                                  |        |        |        |        |        |               |
| Autographa californica nucleopolyhedrovirus NC 0... | (118581) | 118581                                                                        | 118591 | 118602 | 118613 | 118624 | 118635 | 118646 118657 |
|                                                     | (118346) | GGCGGTCGTGAATAATGAAACGAAGCAAAACTGCGCATTGGAGCTCCAATTTTGGCCGGCAAAAAGCTGGTTTCGG  |        |        |        |        |        |               |
|                                                     | (29904)  | -----                                                                         |        |        |        |        |        |               |
|                                                     |          | Section 1542                                                                  |        |        |        |        |        |               |
| Autographa californica nucleopolyhedrovirus NC 0... | (118658) | 118658                                                                        | 118668 | 118679 | 118690 | 118701 | 118712 | 118723 118734 |
|                                                     | (118423) | TCGTGACGGCGTTTCATCGTGTGGCGAAAACGAATGGCTGTTACCGGTGACGGGAATTCGAGAGGCGTCCCAGCTG  |        |        |        |        |        |               |
|                                                     | (29904)  | -----                                                                         |        |        |        |        |        |               |
|                                                     |          | Section 1543                                                                  |        |        |        |        |        |               |
| Autographa californica nucleopolyhedrovirus NC 0... | (118735) | 118735                                                                        | 118745 | 118756 | 118767 | 118778 | 118789 | 118800 118811 |
|                                                     | (118500) | TCGGGACATATGAAGGTGCTGAACGGCGTCCGTGTTGAAAAATGGCGACCCAACATGTCCGTCTACGGGACTGTGCA |        |        |        |        |        |               |
|                                                     | (29904)  | -----                                                                         |        |        |        |        |        |               |
|                                                     |          | Section 1544                                                                  |        |        |        |        |        |               |
| Autographa californica nucleopolyhedrovirus NC 0... | (118812) | 118812                                                                        | 118822 | 118833 | 118844 | 118855 | 118866 | 118877 118888 |
|                                                     | (118577) | ATTGCCGTACGATAAAATTAAACAGCATGCGCTCGAGCAAGAAAATAAAACGCCAAACGCGTTGGAGTCTTGTGTGC |        |        |        |        |        |               |
|                                                     | (29904)  | -----                                                                         |        |        |        |        |        |               |
|                                                     |          | Section 1545                                                                  |        |        |        |        |        |               |
| Autographa californica nucleopolyhedrovirus NC 0... | (118889) | 118889                                                                        | 118899 | 118910 | 118921 | 118932 | 118943 | 118954 118965 |
|                                                     | (118654) | TATTTTACAAAGATTCAGAAATACGCATCACTTACAACAAGGGGGACTATGAAATTATGCATTTGAGGATGCCGGGA |        |        |        |        |        |               |
|                                                     | (29904)  | -----                                                                         |        |        |        |        |        |               |
|                                                     |          | Section 1546                                                                  |        |        |        |        |        |               |
| Autographa californica nucleopolyhedrovirus NC 0... | (118966) | 118966                                                                        | 118976 | 118987 | 118998 | 119009 | 119020 | 119031 119042 |
|                                                     | (118731) | CCTTTAATTCAACCCAACACAATATATTATAGTTAAATAAGAATTATTATCAAATCATTTGTATATTAATTAATA   |        |        |        |        |        |               |
|                                                     | (29904)  | -----                                                                         |        |        |        |        |        |               |
|                                                     |          | Section 1547                                                                  |        |        |        |        |        |               |
| Autographa californica nucleopolyhedrovirus NC 0... | (119043) | 119043                                                                        | 119053 | 119064 | 119075 | 119086 | 119097 | 119108 119119 |
|                                                     | (118808) | CTATACTGTAAATTACATTTTATTACAAATCATGTCAAAGCCTAACGTTTTGACGCAAATTTAGACGCCGTTACGG  |        |        |        |        |        |               |
|                                                     | (29904)  | -----                                                                         |        |        |        |        |        |               |

## SARS-CoV-2 &amp; Autographa californica nucleopolyhedrovirus.apr

|                                                     |          |                                                                                 |        |        |        |        |        |               |
|-----------------------------------------------------|----------|---------------------------------------------------------------------------------|--------|--------|--------|--------|--------|---------------|
|                                                     |          | Section 1548                                                                    |        |        |        |        |        |               |
| Autographa californica nucleopolyhedrovirus NC 0... | (119120) | 119120                                                                          | 119130 | 119141 | 119152 | 119163 | 119174 | 119185 119196 |
|                                                     | (118885) | AAACTAACACAAAGGTTGACAGTGTTCAAACTCAGTTAAACGGGCTGGAAGAATCATTCCAGCTTTTGGACGGTTTG   |        |        |        |        |        |               |
|                                                     | (29904)  | -----                                                                           |        |        |        |        |        |               |
|                                                     |          | Section 1549                                                                    |        |        |        |        |        |               |
| Autographa californica nucleopolyhedrovirus NC 0... | (119197) | 119197                                                                          | 119207 | 119218 | 119229 | 119240 | 119251 | 119262 119273 |
|                                                     | (118962) | CCCGCTCAATTGACCGATCTTAACACTAAGATCTCAGAAATTCAATCCATATTGACCGGCGACATTGTTCCGGATCT   |        |        |        |        |        |               |
|                                                     | (29904)  | -----                                                                           |        |        |        |        |        |               |
|                                                     |          | Section 1550                                                                    |        |        |        |        |        |               |
| Autographa californica nucleopolyhedrovirus NC 0... | (119274) | 119274                                                                          | 119284 | 119295 | 119306 | 119317 | 119328 | 119339 119350 |
|                                                     | (119039) | TCCAGACTCACTAAAGCCTAAGCTGAAAACCCAAGCTTTTGAACCTCGATTTCAGACGCTCGTCGTGGTAAACGCAGTT |        |        |        |        |        |               |
|                                                     | (29904)  | -----                                                                           |        |        |        |        |        |               |
|                                                     |          | Section 1551                                                                    |        |        |        |        |        |               |
| Autographa californica nucleopolyhedrovirus NC 0... | (119351) | 119351                                                                          | 119361 | 119372 | 119383 | 119394 | 119405 | 119416 119427 |
|                                                     | (119116) | CCAAGTAAATGAATCGTTTTTAAAAATAACAAATCAATTGTTTTATAATATTTCGTACGATTCTTTGATTATGTAATAA |        |        |        |        |        |               |
|                                                     | (29904)  | -----                                                                           |        |        |        |        |        |               |
|                                                     |          | Section 1552                                                                    |        |        |        |        |        |               |
| Autographa californica nucleopolyhedrovirus NC 0... | (119428) | 119428                                                                          | 119438 | 119449 | 119460 | 119471 | 119482 | 119493 119504 |
|                                                     | (119193) | AATGTGATCATTAGGAAGATTACGAAAAATATAAAAAATATGAGTTCTGTGTGTATAACAAATGCTGTAAACGCCAC   |        |        |        |        |        |               |
|                                                     | (29904)  | -----                                                                           |        |        |        |        |        |               |
|                                                     |          | Section 1553                                                                    |        |        |        |        |        |               |
| Autographa californica nucleopolyhedrovirus NC 0... | (119505) | 119505                                                                          | 119515 | 119526 | 119537 | 119548 | 119559 | 119570 119581 |
|                                                     | (119270) | AATTGTGTTTGTGCAAATAAACCCAGTATTATTTGATTAAATGTTGTTTTCTTTGTTTCATAGACAATAGTGTGT     |        |        |        |        |        |               |
|                                                     | (29904)  | -----                                                                           |        |        |        |        |        |               |
|                                                     |          | Section 1554                                                                    |        |        |        |        |        |               |
| Autographa californica nucleopolyhedrovirus NC 0... | (119582) | 119582                                                                          | 119592 | 119603 | 119614 | 119625 | 119636 | 119647 119658 |
|                                                     | (119347) | TTTGCCTAAACGTGTACTGCATAAACTCCATGCGAGTGTATAGCGAGCTAGTGGCTAACGCTTGCCCCACCAAAGTA   |        |        |        |        |        |               |
|                                                     | (29904)  | -----                                                                           |        |        |        |        |        |               |

## SARS-CoV-2 &amp; Autographa californica nucleopolyhedrovirus.apr

|                                                     |          |                                                                                |        |        |        |        |        |               |
|-----------------------------------------------------|----------|--------------------------------------------------------------------------------|--------|--------|--------|--------|--------|---------------|
|                                                     |          | Section 1555                                                                   |        |        |        |        |        |               |
| Autographa californica nucleopolyhedrovirus NC 0... | (119659) | 119659                                                                         | 119669 | 119680 | 119691 | 119702 | 119713 | 119724 119735 |
|                                                     | (119424) | GATTTCGTCAAATCCTCAATTTTCATCACCTCCTCCAAGTTTAACATTTGGCCGTCGGAATTAAC TTCTAAAGATGC |        |        |        |        |        |               |
|                                                     | (29904)  | -----                                                                          |        |        |        |        |        |               |
|                                                     |          | Section 1556                                                                   |        |        |        |        |        |               |
| Autographa californica nucleopolyhedrovirus NC 0... | (119736) | 119736                                                                         | 119746 | 119757 | 119768 | 119779 | 119790 | 119801 119812 |
|                                                     | (119501) | CACATAATCTAATAAATGAAATAGAGATTCAAACGTGGCGTCATCGTCCGTTTCGACCATTTCCGAAAAGAACTCGG  |        |        |        |        |        |               |
|                                                     | (29904)  | -----                                                                          |        |        |        |        |        |               |
|                                                     |          | Section 1557                                                                   |        |        |        |        |        |               |
| Autographa californica nucleopolyhedrovirus NC 0... | (119813) | 119813                                                                         | 119823 | 119834 | 119845 | 119856 | 119867 | 119878 119889 |
|                                                     | (119578) | GCATAAACTCTATGATTTCTCTGGACGTGGTGTGTGTCGAAACTCTCAAAGTACGCAGTCAGGAACGTGCGCGACATG |        |        |        |        |        |               |
|                                                     | (29904)  | -----                                                                          |        |        |        |        |        |               |
|                                                     |          | Section 1558                                                                   |        |        |        |        |        |               |
| Autographa californica nucleopolyhedrovirus NC 0... | (119890) | 119890                                                                         | 119900 | 119911 | 119922 | 119933 | 119944 | 119955 119966 |
|                                                     | (119655) | TCGTCGGGAAACTCGCGCGAAACATGTTGTTGTAACCGAACGGGTCCCATAGCGCCAAAACCAAATCTGCCAGCGT   |        |        |        |        |        |               |
|                                                     | (29904)  | -----                                                                          |        |        |        |        |        |               |
|                                                     |          | Section 1559                                                                   |        |        |        |        |        |               |
| Autographa californica nucleopolyhedrovirus NC 0... | (119967) | 119967                                                                         | 119977 | 119988 | 119999 | 120010 | 120021 | 120032 120043 |
|                                                     | (119732) | CAATAGAATGAGCACGATGCCGACAATGGAGCTGGCTTGGATAGCGATTGAGTTAACGCTTTGGCAGTCACGGTCA   |        |        |        |        |        |               |
|                                                     | (29904)  | -----                                                                          |        |        |        |        |        |               |
|                                                     |          | Section 1560                                                                   |        |        |        |        |        |               |
| Autographa californica nucleopolyhedrovirus NC 0... | (120044) | 120044                                                                         | 120054 | 120065 | 120076 | 120087 | 120098 | 120109 120120 |
|                                                     | (119809) | GCGTTTTGATGGCGATCACGTTGAGCGAGTGCACTAACCGGCTTTGTAAGTCTCTCCCAACATGCGCACGGTCACG   |        |        |        |        |        |               |
|                                                     | (29904)  | -----                                                                          |        |        |        |        |        |               |
|                                                     |          | Section 1561                                                                   |        |        |        |        |        |               |
| Autographa californica nucleopolyhedrovirus NC 0... | (120121) | 120121                                                                         | 120131 | 120142 | 120153 | 120164 | 120175 | 120186 120197 |
|                                                     | (119886) | CGCCGAGTCGTGCTAAGCAACATGTGTTTCATGGCCGGAATGAGAGAAGTGTTAATTTTTTTCAACATGCTTTTAA   |        |        |        |        |        |               |
|                                                     | (29904)  | -----                                                                          |        |        |        |        |        |               |

## SARS-CoV-2 &amp; Autographa californica nucleopolyhedrovirus.apr

|                                                     |          |                                                                               |        |        |        |        |        |               |
|-----------------------------------------------------|----------|-------------------------------------------------------------------------------|--------|--------|--------|--------|--------|---------------|
|                                                     |          | Section 1562                                                                  |        |        |        |        |        |               |
| Autographa californica nucleopolyhedrovirus NC 0... | (120198) | 120198                                                                        | 120208 | 120219 | 120230 | 120241 | 120252 | 120263 120274 |
|                                                     | (119963) | CCCGGACATTAGCATATCAAAGCCAATGTCCGTAGCAATACCGAAAACGAGCGCGTAATCTTCCAAAAACGATGTTA |        |        |        |        |        |               |
|                                                     | (29904)  | -----                                                                         |        |        |        |        |        |               |
|                                                     |          | Section 1563                                                                  |        |        |        |        |        |               |
| Autographa californica nucleopolyhedrovirus NC 0... | (120275) | 120275                                                                        | 120285 | 120296 | 120307 | 120318 | 120329 | 120340 120351 |
|                                                     | (120040) | TAATTGACTCCAAGTCTTGGTCGCTGATTGAACGGTCGAGCGCCTCGAAATGTTGACACGTGCACGTTTCGTTACCG |        |        |        |        |        |               |
|                                                     | (29904)  | -----                                                                         |        |        |        |        |        |               |
|                                                     |          | Section 1564                                                                  |        |        |        |        |        |               |
| Autographa californica nucleopolyhedrovirus NC 0... | (120352) | 120352                                                                        | 120362 | 120373 | 120384 | 120395 | 120406 | 120417 120428 |
|                                                     | (120117) | CGGTAATTGTATGCGATCGGAGTTTTAGTAAAGCCGTTTCGGCCGTGTACGTGATCTGGACGGGCGACCCGTTGAC  |        |        |        |        |        |               |
|                                                     | (29904)  | -----                                                                         |        |        |        |        |        |               |
|                                                     |          | Section 1565                                                                  |        |        |        |        |        |               |
| Autographa californica nucleopolyhedrovirus NC 0... | (120429) | 120429                                                                        | 120439 | 120450 | 120461 | 120472 | 120483 | 120494 120505 |
|                                                     | (120194) | GATCATGCCCAAATCGTTTAGTGTGGATTTTTGTTAAAAAGTTTTTCAAATTCCAAGTCTGTGGCGTTATCGCGCA  |        |        |        |        |        |               |
|                                                     | (29904)  | -----                                                                         |        |        |        |        |        |               |
|                                                     |          | Section 1566                                                                  |        |        |        |        |        |               |
| Autographa californica nucleopolyhedrovirus NC 0... | (120506) | 120506                                                                        | 120516 | 120527 | 120538 | 120549 | 120560 | 120571 120582 |
|                                                     | (120271) | CGCTGCGCCATTGCGCTAGTATTGCGTTGGAGTCCACGTTGGGTCGTGGCGGTAGTATGCTGGAAGGCGCTTTGTAA |        |        |        |        |        |               |
|                                                     | (29904)  | -----                                                                         |        |        |        |        |        |               |
|                                                     |          | Section 1567                                                                  |        |        |        |        |        |               |
| Autographa californica nucleopolyhedrovirus NC 0... | (120583) | 120583                                                                        | 120593 | 120604 | 120615 | 120626 | 120637 | 120648 120659 |
|                                                     | (120348) | TCAAAATCGCGCAGTTCGCTAAAAATGTTGTTGGCCAGCATTTTGAAAGTGACAAAGATCGTGTCGCCAGCACGAA  |        |        |        |        |        |               |
|                                                     | (29904)  | -----                                                                         |        |        |        |        |        |               |
|                                                     |          | Section 1568                                                                  |        |        |        |        |        |               |
| Autographa californica nucleopolyhedrovirus NC 0... | (120660) | 120660                                                                        | 120670 | 120681 | 120692 | 120703 | 120714 | 120725 120736 |
|                                                     | (120425) | TCCGATGAGCGATTCCCACCATCTAAACGAACAACCGCCGTTGAATAGCTCTCTGCCGAAACGTCGACAGTAGGCTT |        |        |        |        |        |               |
|                                                     | (29904)  | -----                                                                         |        |        |        |        |        |               |



## SARS-CoV-2 &amp; Autographa californica nucleopolyhedrovirus.apr

|                                                     |          |                                                                                |        |        |        |        |        |               |
|-----------------------------------------------------|----------|--------------------------------------------------------------------------------|--------|--------|--------|--------|--------|---------------|
|                                                     |          | Section 1569                                                                   |        |        |        |        |        |               |
| Autographa californica nucleopolyhedrovirus NC 0... | (120737) | 120737                                                                         | 120747 | 120758 | 120769 | 120780 | 120791 | 120802 120813 |
|                                                     | (120502) | CGTTGAATTCGCCTTTAAAGCGTTCGGGAAACAAGGGGTCGGGATCGGGCCGAACGTTAAAAGCCGGCACATCGTCC  |        |        |        |        |        |               |
|                                                     | (29904)  | -----                                                                          |        |        |        |        |        |               |
|                                                     |          | Section 1570                                                                   |        |        |        |        |        |               |
| Autographa californica nucleopolyhedrovirus NC 0... | (120814) | 120814                                                                         | 120824 | 120835 | 120846 | 120857 | 120868 | 120879 120890 |
|                                                     | (120579) | ACGCCCATGATCGTGTGTTCTTCGGTGCGCAAGTATGGGCTGTTAAAGTACATTTTGGACAGCGAGTCCACTAAGAT  |        |        |        |        |        |               |
|                                                     | (29904)  | -----                                                                          |        |        |        |        |        |               |
|                                                     |          | Section 1571                                                                   |        |        |        |        |        |               |
| Autographa californica nucleopolyhedrovirus NC 0... | (120891) | 120891                                                                         | 120901 | 120912 | 120923 | 120934 | 120945 | 120956 120967 |
|                                                     | (120656) | GCATTTGTTGTCGAGCGTGTATCTAAACTCGGCAGACTGAACTTGGGTTTCGGCGCCTTCACGCATGGCCGCCGCC   |        |        |        |        |        |               |
|                                                     | (29904)  | -----                                                                          |        |        |        |        |        |               |
|                                                     |          | Section 1572                                                                   |        |        |        |        |        |               |
| Autographa californica nucleopolyhedrovirus NC 0... | (120968) | 120968                                                                         | 120978 | 120989 | 121000 | 121011 | 121022 | 121033 121044 |
|                                                     | (120733) | TGTCCAGGTGGTAGCACGCGGGCTGCGCGTAACCCACGCTAGTCTCGGAGGTCTGCATGTACATGAACGGCGTCGTG  |        |        |        |        |        |               |
|                                                     | (29904)  | -----                                                                          |        |        |        |        |        |               |
|                                                     |          | Section 1573                                                                   |        |        |        |        |        |               |
| Autographa californica nucleopolyhedrovirus NC 0... | (121045) | 121045                                                                         | 121055 | 121066 | 121077 | 121088 | 121099 | 121110 121121 |
|                                                     | (120810) | TTGGACACGACGCCGTTTCGTGAAACGGATAGCAGCTCATGCTTACACACCCGCGCTTGCTGAAAGCCAGTTTGAC   |        |        |        |        |        |               |
|                                                     | (29904)  | -----                                                                          |        |        |        |        |        |               |
|                                                     |          | Section 1574                                                                   |        |        |        |        |        |               |
| Autographa californica nucleopolyhedrovirus NC 0... | (121122) | 121122                                                                         | 121132 | 121143 | 121154 | 121165 | 121176 | 121187 121198 |
|                                                     | (120887) | GGCCAGCGCTTTGTCGGCCAATTTTCGGCGGCACATAATAATCGTCGTCACCTGACGCGGGACGCAGCGTGTAGTCGA |        |        |        |        |        |               |
|                                                     | (29904)  | -----                                                                          |        |        |        |        |        |               |
|                                                     |          | Section 1575                                                                   |        |        |        |        |        |               |
| Autographa californica nucleopolyhedrovirus NC 0... | (121199) | 121199                                                                         | 121209 | 121220 | 121231 | 121242 | 121253 | 121264 121275 |
|                                                     | (120964) | TTAGTATATGCGGAAACCTGGTGCGCCATCTCGAAATAAACTCGAGACGATGCATATGTATGGCATACTACTGGCA   |        |        |        |        |        |               |
|                                                     | (29904)  | -----                                                                          |        |        |        |        |        |               |

## SARS-CoV-2 &amp; Autographa californica nucleopolyhedrovirus.apr

|                                                     |          |                                                                                |        |        |        |        |        |               |
|-----------------------------------------------------|----------|--------------------------------------------------------------------------------|--------|--------|--------|--------|--------|---------------|
|                                                     |          | Section 1576                                                                   |        |        |        |        |        |               |
| Autographa californica nucleopolyhedrovirus NC 0... | (121276) | 121276                                                                         | 121286 | 121297 | 121308 | 121319 | 121330 | 121341 121352 |
|                                                     | (121041) | TTAGTTAAATCGACGGCTGTTAAAACCGCCATGTTATATAGGACTTAAAAATAACAACAATATATAATGAAATATTT  |        |        |        |        |        |               |
|                                                     | (29904)  | -----                                                                          |        |        |        |        |        |               |
|                                                     |          | Section 1577                                                                   |        |        |        |        |        |               |
| Autographa californica nucleopolyhedrovirus NC 0... | (121353) | 121353                                                                         | 121363 | 121374 | 121385 | 121396 | 121407 | 121418 121429 |
|                                                     | (121118) | ATTAGATTATATTATAGCAATACATTTACATTTATTATAACAATACTTTTTATTTAATCTGATTATATTATAACGAT  |        |        |        |        |        |               |
|                                                     | (29904)  | -----                                                                          |        |        |        |        |        |               |
|                                                     |          | Section 1578                                                                   |        |        |        |        |        |               |
| Autographa californica nucleopolyhedrovirus NC 0... | (121430) | 121430                                                                         | 121440 | 121451 | 121462 | 121473 | 121484 | 121495 121506 |
|                                                     | (121195) | ACATTTTTTATTAGACATTGTTATTTACAATATTAATTAACCTTTTTATACATTTTTAAATCATAATATATAATCATT |        |        |        |        |        |               |
|                                                     | (29904)  | -----                                                                          |        |        |        |        |        |               |
|                                                     |          | Section 1579                                                                   |        |        |        |        |        |               |
| Autographa californica nucleopolyhedrovirus NC 0... | (121507) | 121507                                                                         | 121517 | 121528 | 121539 | 121550 | 121561 | 121572 121583 |
|                                                     | (121272) | TCGTTGTGCATTTCAAAGCTTTTGATAGCTTCAAAGTAATACATGAATTTAGAGTATTCAGGAAAATGATAAACGTT  |        |        |        |        |        |               |
|                                                     | (29904)  | -----                                                                          |        |        |        |        |        |               |
|                                                     |          | Section 1580                                                                   |        |        |        |        |        |               |
| Autographa californica nucleopolyhedrovirus NC 0... | (121584) | 121584                                                                         | 121594 | 121605 | 121616 | 121627 | 121638 | 121649 121660 |
|                                                     | (121349) | GGTAAACCCGCATTTGGTACAATATAACACGGGATTTTTATAATACAGTTTAGTTTTTTTACACAATTTGCAATAGT  |        |        |        |        |        |               |
|                                                     | (29904)  | -----                                                                          |        |        |        |        |        |               |
|                                                     |          | Section 1581                                                                   |        |        |        |        |        |               |
| Autographa californica nucleopolyhedrovirus NC 0... | (121661) | 121661                                                                         | 121671 | 121682 | 121693 | 121704 | 121715 | 121726 121737 |
|                                                     | (121426) | TGTTAGTTGTAGGTTTCAAAGGAAACGTGATTGCGCCGTCCAATACCTGGGTAACTTTTTGACTTTAACAGTGGCA   |        |        |        |        |        |               |
|                                                     | (29904)  | -----                                                                          |        |        |        |        |        |               |
|                                                     |          | Section 1582                                                                   |        |        |        |        |        |               |
| Autographa californica nucleopolyhedrovirus NC 0... | (121738) | 121738                                                                         | 121748 | 121759 | 121770 | 121781 | 121792 | 121803 121814 |
|                                                     | (121503) | AACACGGTTCCTTTGATACCCGAAAATCGGTTGTCTTGCAGAGCGGCCATCATTTGCTTGGCTCTTGAAGTATAAA   |        |        |        |        |        |               |
|                                                     | (29904)  | -----                                                                          |        |        |        |        |        |               |

## SARS-CoV-2 &amp; Autographa californica nucleopolyhedrovirus.apr

|                                                     |          |                                                                                |        |        |        |        |        |               |
|-----------------------------------------------------|----------|--------------------------------------------------------------------------------|--------|--------|--------|--------|--------|---------------|
|                                                     |          | Section 1583                                                                   |        |        |        |        |        |               |
| Autographa californica nucleopolyhedrovirus NC 0... | (121815) | 121815                                                                         | 121825 | 121836 | 121847 | 121858 | 121869 | 121880 121891 |
|                                                     | (121580) | ACAGTTGACGTCATCCACCACGTCGGGTCTGGTGCACATGCTTCGGTAGCGCTGCAACACTATATTGGTGTATGTTT  |        |        |        |        |        |               |
|                                                     | (29904)  | -----                                                                          |        |        |        |        |        |               |
|                                                     |          | Section 1584                                                                   |        |        |        |        |        |               |
| Autographa californica nucleopolyhedrovirus NC 0... | (121892) | 121892                                                                         | 121902 | 121913 | 121924 | 121935 | 121946 | 121957 121968 |
|                                                     | (121657) | CCCTGAGAACGAGACCGCCGGTGGTGTAAAGATCGATTGTTTGAATGCGCTCGTTGGGCTCTTTGTGATTTTCAATT  |        |        |        |        |        |               |
|                                                     | (29904)  | -----                                                                          |        |        |        |        |        |               |
|                                                     |          | Section 1585                                                                   |        |        |        |        |        |               |
| Autographa californica nucleopolyhedrovirus NC 0... | (121969) | 121969                                                                         | 121979 | 121990 | 122001 | 122012 | 122023 | 122034 122045 |
|                                                     | (121734) | ATGCGCCGAATTATTTCAAACACTTTGCAGTTGTGATCGTCAATTCTCAATTCTTTAACTTCCGTCGTGTGCTCTAA  |        |        |        |        |        |               |
|                                                     | (29904)  | -----                                                                          |        |        |        |        |        |               |
|                                                     |          | Section 1586                                                                   |        |        |        |        |        |               |
| Autographa californica nucleopolyhedrovirus NC 0... | (122046) | 122046                                                                         | 122056 | 122067 | 122078 | 122089 | 122100 | 122111 122122 |
|                                                     | (121811) | ACTTACAGGGAAAATGTATTGGTAAAAAAACCTCTCTCTGGCTAAATAGCTGAGGTCGACCAAATTGATAGAAGGAT  |        |        |        |        |        |               |
|                                                     | (29904)  | -----                                                                          |        |        |        |        |        |               |
|                                                     |          | Section 1587                                                                   |        |        |        |        |        |               |
| Autographa californica nucleopolyhedrovirus NC 0... | (122123) | 122123                                                                         | 122133 | 122144 | 122155 | 122166 | 122177 | 122188 122199 |
|                                                     | (121888) | ATATTTTCGTACGAGGTTTTTGAACGTTGTGATATAGATAGCATTTTTTGACAGCAGATGTCTATGCGGTCAGGATCG |        |        |        |        |        |               |
|                                                     | (29904)  | -----                                                                          |        |        |        |        |        |               |
|                                                     |          | Section 1588                                                                   |        |        |        |        |        |               |
| Autographa californica nucleopolyhedrovirus NC 0... | (122200) | 122200                                                                         | 122210 | 122221 | 122232 | 122243 | 122254 | 122265 122276 |
|                                                     | (121965) | TCCAACGGCTTTTCGATGTGAACCACAACATACAAAAACCATTCGCGCGTGTTGTCTTTGAATCTATAATTGCAAGT  |        |        |        |        |        |               |
|                                                     | (29904)  | -----                                                                          |        |        |        |        |        |               |
|                                                     |          | Section 1589                                                                   |        |        |        |        |        |               |
| Autographa californica nucleopolyhedrovirus NC 0... | (122277) | 122277                                                                         | 122287 | 122298 | 122309 | 122320 | 122331 | 122342 122353 |
|                                                     | (122042) | GGTGCATCGCGAATCGCTCATGTGCTCCATAGTCTTCTTGATTTTACAGGCCTGCTTGCAAATTTGCCCGTCATGC   |        |        |        |        |        |               |
|                                                     | (29904)  | -----                                                                          |        |        |        |        |        |               |

## SARS-CoV-2 &amp; Autographa californica nucleopolyhedrovirus.apr

|                                                     |          |                                                                                |        |        |        |        |        |               |
|-----------------------------------------------------|----------|--------------------------------------------------------------------------------|--------|--------|--------|--------|--------|---------------|
|                                                     |          | Section 1590                                                                   |        |        |        |        |        |               |
| Autographa californica nucleopolyhedrovirus NC 0... | (122354) | 122354                                                                         | 122364 | 122375 | 122386 | 122397 | 122408 | 122419 122430 |
|                                                     | (122119) | GCATATCTTTGCTGTTTATGTAGCCCATAAATGTAATTGGTGGAAAATTTTAGCGTGGCTTTCATGATGTCGCTTCT  |        |        |        |        |        |               |
|                                                     | (29904)  | -----                                                                          |        |        |        |        |        |               |
|                                                     |          | Section 1591                                                                   |        |        |        |        |        |               |
| Autographa californica nucleopolyhedrovirus NC 0... | (122431) | 122431                                                                         | 122441 | 122452 | 122463 | 122474 | 122485 | 122496 122507 |
|                                                     | (122196) | AAATCGCTCATGAAATGCATACGTAGATCGCGCTCTTGTGTTGAAATCCAGTTTGTGCTGTACGCGGGCAAACCTTC  |        |        |        |        |        |               |
|                                                     | (29904)  | -----                                                                          |        |        |        |        |        |               |
|                                                     |          | Section 1592                                                                   |        |        |        |        |        |               |
| Autographa californica nucleopolyhedrovirus NC 0... | (122508) | 122508                                                                         | 122518 | 122529 | 122540 | 122551 | 122562 | 122573 122584 |
|                                                     | (122273) | AAACTTGTTCCCAAACCTCGGGCGGCACAAAATATCCATCTTTTCTGTTGACGACTGGTTTTTACTTACAATGCTGC  |        |        |        |        |        |               |
|                                                     | (29904)  | -----                                                                          |        |        |        |        |        |               |
|                                                     |          | Section 1593                                                                   |        |        |        |        |        |               |
| Autographa californica nucleopolyhedrovirus NC 0... | (122585) | 122585                                                                         | 122595 | 122606 | 122617 | 122628 | 122639 | 122650 122661 |
|                                                     | (122350) | TGTGCTCCAACGGCTTGGCCGAGAGGTGCACATAGGCTGTTTAGGCGGAGAGATGCGCGTAGGTGGTTTGATGTTA   |        |        |        |        |        |               |
|                                                     | (29904)  | -----                                                                          |        |        |        |        |        |               |
|                                                     |          | Section 1594                                                                   |        |        |        |        |        |               |
| Autographa californica nucleopolyhedrovirus NC 0... | (122662) | 122662                                                                         | 122672 | 122683 | 122694 | 122705 | 122716 | 122727 122738 |
|                                                     | (122427) | GATTTTGGCGGCGGACGAACAGGCGACGGCGGCGAGTTGGCGGCAGGCGCTGGCAAAGATTGGCACGACCCTTGCC   |        |        |        |        |        |               |
|                                                     | (29904)  | -----                                                                          |        |        |        |        |        |               |
|                                                     |          | Section 1595                                                                   |        |        |        |        |        |               |
| Autographa californica nucleopolyhedrovirus NC 0... | (122739) | 122739                                                                         | 122749 | 122760 | 122771 | 122782 | 122793 | 122804 122815 |
|                                                     | (122504) | CCCGGTCCTTGGCGCGTCAAAAATGTTATTCTCTCGAAAAAACGGTTCATTGTAAGTGTAGTTAGCACTCAGAAA    |        |        |        |        |        |               |
|                                                     | (29904)  | -----                                                                          |        |        |        |        |        |               |
|                                                     |          | Section 1596                                                                   |        |        |        |        |        |               |
| Autographa californica nucleopolyhedrovirus NC 0... | (122816) | 122816                                                                         | 122826 | 122837 | 122848 | 122859 | 122870 | 122881 122892 |
|                                                     | (122581) | TCAACACGATACTGTGCACGTTTCAGCCATCGAGAGGCTTTATATATGGAAACCTTATCTATAGAGATAAGATTGTAT |        |        |        |        |        |               |
|                                                     | (29904)  | -----                                                                          |        |        |        |        |        |               |

## SARS-CoV-2 &amp; Autographa californica nucleopolyhedrovirus.apr

|                                                     |          |                                                                                |        |        |        |        |        |               |
|-----------------------------------------------------|----------|--------------------------------------------------------------------------------|--------|--------|--------|--------|--------|---------------|
|                                                     |          | Section 1597                                                                   |        |        |        |        |        |               |
| Autographa californica nucleopolyhedrovirus NC 0... | (122893) | 122893                                                                         | 122903 | 122914 | 122925 | 122936 | 122947 | 122958 122969 |
|                                                     | (122658) | ATGCGTAGGAGAGCCTGGTCACGTAGGCACCTTGCGCACGGCACTAGGGCTGTGGAGGGGACAGGCTATATAAAGCC  |        |        |        |        |        |               |
|                                                     | (29904)  | -----                                                                          |        |        |        |        |        |               |
|                                                     |          | Section 1598                                                                   |        |        |        |        |        |               |
| Autographa californica nucleopolyhedrovirus NC 0... | (122970) | 122970                                                                         | 122980 | 122991 | 123002 | 123013 | 123024 | 123035 123046 |
|                                                     | (122735) | CGTTTGCCCAACTCGTAAATCAGTATCAATTGTGCTCCGGCGCACACGCTCGCTTGCGCGCCGGATAGTATAAGTAA  |        |        |        |        |        |               |
|                                                     | (29904)  | -----                                                                          |        |        |        |        |        |               |
|                                                     |          | Section 1599                                                                   |        |        |        |        |        |               |
| Autographa californica nucleopolyhedrovirus NC 0... | (123047) | 123047                                                                         | 123057 | 123068 | 123079 | 123090 | 123101 | 123112 123123 |
|                                                     | (122812) | TTGATAACGGGCAACGCAACATGATAAGAACCAGCAGTCACGTGCTGAACGTCCAGGAAAATATAATGACGTCAAAC  |        |        |        |        |        |               |
|                                                     | (29904)  | -----                                                                          |        |        |        |        |        |               |
|                                                     |          | Section 1600                                                                   |        |        |        |        |        |               |
| Autographa californica nucleopolyhedrovirus NC 0... | (123124) | 123124                                                                         | 123134 | 123145 | 123156 | 123167 | 123178 | 123189 123200 |
|                                                     | (122889) | TGTGCGTCATCGCCATATTCGTGCGAGGCAACGTCCGCTTGCGCAGAAGCTCAGCAGGTAATGATCGATAACTTTGT  |        |        |        |        |        |               |
|                                                     | (29904)  | -----                                                                          |        |        |        |        |        |               |
|                                                     |          | Section 1601                                                                   |        |        |        |        |        |               |
| Autographa californica nucleopolyhedrovirus NC 0... | (123201) | 123201                                                                         | 123211 | 123222 | 123233 | 123244 | 123255 | 123266 123277 |
|                                                     | (122966) | TTTCTTTTCACATGTACAACGCCGACATACAAATTGACGCAAAGCTGCAATGCGGCGTGCGCTCGGCCGCGTTTGCAA |        |        |        |        |        |               |
|                                                     | (29904)  | -----                                                                          |        |        |        |        |        |               |
|                                                     |          | Section 1602                                                                   |        |        |        |        |        |               |
| Autographa californica nucleopolyhedrovirus NC 0... | (123278) | 123278                                                                         | 123288 | 123299 | 123310 | 123321 | 123332 | 123343 123354 |
|                                                     | (123043) | TGATCGACGATAAACATTTGGAAATGTACAAGCATAGAAATAGAGAATAAATTTTTTTATTACTATGATCAATGTGCC |        |        |        |        |        |               |
|                                                     | (29904)  | -----                                                                          |        |        |        |        |        |               |
|                                                     |          | Section 1603                                                                   |        |        |        |        |        |               |
| Autographa californica nucleopolyhedrovirus NC 0... | (123355) | 123355                                                                         | 123365 | 123376 | 123387 | 123398 | 123409 | 123420 123431 |
|                                                     | (123120) | GACATTGCCAAACCCGACCGTCTGCCCGATGACGACGGCGCGTGCTGTCAACATTTTATTTTGTATGCCCAACGTAT  |        |        |        |        |        |               |
|                                                     | (29904)  | -----                                                                          |        |        |        |        |        |               |

## SARS-CoV-2 &amp; Autographa californica nucleopolyhedrovirus.apr

|                                                     |          |                                                                               |                        |                        |                        |                        |                        |                                               |
|-----------------------------------------------------|----------|-------------------------------------------------------------------------------|------------------------|------------------------|------------------------|------------------------|------------------------|-----------------------------------------------|
|                                                     |          | Section 1604                                                                  |                        |                        |                        |                        |                        |                                               |
| Autographa californica nucleopolyhedrovirus NC 0... | (123432) | <a href="#">123432</a>                                                        | <a href="#">123442</a> | <a href="#">123453</a> | <a href="#">123464</a> | <a href="#">123475</a> | <a href="#">123486</a> | <a href="#">123497</a> <a href="#">123508</a> |
|                                                     | (123197) | TATTCAATGTATTAAAGAGATTGAAAGCGCTACGGCGTGCGTGATCGCGGCAATGTAATAGTGTTTTATCCGTACT  |                        |                        |                        |                        |                        |                                               |
|                                                     | (29904)  | -----                                                                         |                        |                        |                        |                        |                        |                                               |
|                                                     |          | Section 1605                                                                  |                        |                        |                        |                        |                        |                                               |
| Autographa californica nucleopolyhedrovirus NC 0... | (123509) | <a href="#">123509</a>                                                        | <a href="#">123519</a> | <a href="#">123530</a> | <a href="#">123541</a> | <a href="#">123552</a> | <a href="#">123563</a> | <a href="#">123574</a> <a href="#">123585</a> |
|                                                     | (123274) | TGAAACAGTTGCGAGACGCGTTGAAGCTAATTAAAACTCTTTTGCGTGTTGTTTTAAATTATAAATTCTATGCAA   |                        |                        |                        |                        |                        |                                               |
|                                                     | (29904)  | -----                                                                         |                        |                        |                        |                        |                        |                                               |
|                                                     |          | Section 1606                                                                  |                        |                        |                        |                        |                        |                                               |
| Autographa californica nucleopolyhedrovirus NC 0... | (123586) | <a href="#">123586</a>                                                        | <a href="#">123596</a> | <a href="#">123607</a> | <a href="#">123618</a> | <a href="#">123629</a> | <a href="#">123640</a> | <a href="#">123651</a> <a href="#">123662</a> |
|                                                     | (123351) | ATGTACGTGAACGAGTTAATATCAAATTGCCTGTTGTTTATTGAAAAGCTGGAACTATTAATAAACTGTTAAAGT   |                        |                        |                        |                        |                        |                                               |
|                                                     | (29904)  | -----                                                                         |                        |                        |                        |                        |                        |                                               |
|                                                     |          | Section 1607                                                                  |                        |                        |                        |                        |                        |                                               |
| Autographa californica nucleopolyhedrovirus NC 0... | (123663) | <a href="#">123663</a>                                                        | <a href="#">123673</a> | <a href="#">123684</a> | <a href="#">123695</a> | <a href="#">123706</a> | <a href="#">123717</a> | <a href="#">123728</a> <a href="#">123739</a> |
|                                                     | (123428) | TATGAATTTGTTTGTAGACAATTTGTTTTGTACGAATGCAATGTTTGTAAGAAATATCTACGGATGAAAGATTTT   |                        |                        |                        |                        |                        |                                               |
|                                                     | (29904)  | -----                                                                         |                        |                        |                        |                        |                        |                                               |
|                                                     |          | Section 1608                                                                  |                        |                        |                        |                        |                        |                                               |
| Autographa californica nucleopolyhedrovirus NC 0... | (123740) | <a href="#">123740</a>                                                        | <a href="#">123750</a> | <a href="#">123761</a> | <a href="#">123772</a> | <a href="#">123783</a> | <a href="#">123794</a> | <a href="#">123805</a> <a href="#">123816</a> |
|                                                     | (123505) | TAAAGCCAAAAGAATGTTGCGAATACGCTATATGCAACGCGTGCTGCGTTAACATGTGGAAGACGGCCACCACGCAC |                        |                        |                        |                        |                        |                                               |
|                                                     | (29904)  | -----                                                                         |                        |                        |                        |                        |                        |                                               |
|                                                     |          | Section 1609                                                                  |                        |                        |                        |                        |                        |                                               |
| Autographa californica nucleopolyhedrovirus NC 0... | (123817) | <a href="#">123817</a>                                                        | <a href="#">123827</a> | <a href="#">123838</a> | <a href="#">123849</a> | <a href="#">123860</a> | <a href="#">123871</a> | <a href="#">123882</a> <a href="#">123893</a> |
|                                                     | (123582) | GCAAAATGTCCAGCGTGCAGGACATCGTATAAATAAGCACGCAACGCAAAATGAGTGGTGGCGGCAACTTGTTGACT |                        |                        |                        |                        |                        |                                               |
|                                                     | (29904)  | -----                                                                         |                        |                        |                        |                        |                        |                                               |
|                                                     |          | Section 1610                                                                  |                        |                        |                        |                        |                        |                                               |
| Autographa californica nucleopolyhedrovirus NC 0... | (123894) | <a href="#">123894</a>                                                        | <a href="#">123904</a> | <a href="#">123915</a> | <a href="#">123926</a> | <a href="#">123937</a> | <a href="#">123948</a> | <a href="#">123959</a> <a href="#">123970</a> |
|                                                     | (123659) | CTGGAAAGAGATCATTTTAAATATTTATTTTGGACCAGCTATTTTGATTTAAAGATAATGAACATGTTTCCTTCAGA |                        |                        |                        |                        |                        |                                               |
|                                                     | (29904)  | -----                                                                         |                        |                        |                        |                        |                        |                                               |

## SARS-CoV-2 &amp; Autographa californica nucleopolyhedrovirus.apr

|                                                     |          |                                                                                  |        |        |        |        |        |               |
|-----------------------------------------------------|----------|----------------------------------------------------------------------------------|--------|--------|--------|--------|--------|---------------|
|                                                     |          | Section 1611                                                                     |        |        |        |        |        |               |
| Autographa californica nucleopolyhedrovirus NC 0... | (123971) | 123971                                                                           | 123981 | 123992 | 124003 | 124014 | 124025 | 124036 124047 |
|                                                     | (123736) | GCCTATGGCATTATTCGCAATTACTTGAATTGCACGTTTGATTGCTAGACGATGCCGTGCTCATGAACATATTCA      |        |        |        |        |        |               |
|                                                     | (29904)  | -----                                                                            |        |        |        |        |        |               |
|                                                     |          | Section 1612                                                                     |        |        |        |        |        |               |
| Autographa californica nucleopolyhedrovirus NC 0... | (124048) | 124048                                                                           | 124058 | 124069 | 124080 | 124091 | 124102 | 124113 124124 |
|                                                     | (123813) | ATTACTTGCAAAGCATGCAATTGAAACATTTGGTGGGCAGCACGTCGACAAACATTTTCAAGTTTGTAAGCCACAA     |        |        |        |        |        |               |
|                                                     | (29904)  | -----                                                                            |        |        |        |        |        |               |
|                                                     |          | Section 1613                                                                     |        |        |        |        |        |               |
| Autographa californica nucleopolyhedrovirus NC 0... | (124125) | 124125                                                                           | 124135 | 124146 | 124157 | 124168 | 124179 | 124190 124201 |
|                                                     | (123890) | TTTAGATTTGTGTGCGATCGCACAACTGTGGACATTTTAGAATTTGACACGCGCATGTACATAAAACCCGGCAGGCC    |        |        |        |        |        |               |
|                                                     | (29904)  | -----                                                                            |        |        |        |        |        |               |
|                                                     |          | Section 1614                                                                     |        |        |        |        |        |               |
| Autographa californica nucleopolyhedrovirus NC 0... | (124202) | 124202                                                                           | 124212 | 124223 | 124234 | 124245 | 124256 | 124267 124278 |
|                                                     | (123967) | CGTGTACGCCACGAACCTGTTACAGTCCAATCCCCGCAAGATGATGGCTTTCTGTACGCTGAATTTGGCAAGGTGT     |        |        |        |        |        |               |
|                                                     | (29904)  | -----                                                                            |        |        |        |        |        |               |
|                                                     |          | Section 1615                                                                     |        |        |        |        |        |               |
| Autographa californica nucleopolyhedrovirus NC 0... | (124279) | 124279                                                                           | 124289 | 124300 | 124311 | 124322 | 124333 | 124344 124355 |
|                                                     | (124044) | TTAAAAATAAAATATTCGTAAACATCAACAACACTACGGCTGCGTGTTGGCGGGCAGTGCCGGTTTCTTGTTTCGACGAT |        |        |        |        |        |               |
|                                                     | (29904)  | -----                                                                            |        |        |        |        |        |               |
|                                                     |          | Section 1616                                                                     |        |        |        |        |        |               |
| Autographa californica nucleopolyhedrovirus NC 0... | (124356) | 124356                                                                           | 124366 | 124377 | 124388 | 124399 | 124410 | 124421 124432 |
|                                                     | (124121) | GCGTACGTGGATTGGAATGGTGTGCGAATGTGTGCGGCGCCGCGATTAGATAACAACATGCATCCGTTCCGACTGTA    |        |        |        |        |        |               |
|                                                     | (29904)  | -----                                                                            |        |        |        |        |        |               |
|                                                     |          | Section 1617                                                                     |        |        |        |        |        |               |
| Autographa californica nucleopolyhedrovirus NC 0... | (124433) | 124433                                                                           | 124443 | 124454 | 124465 | 124476 | 124487 | 124498 124509 |
|                                                     | (124198) | TCTACTGGGCGAGGACATGGCTAAGCACTTTGTGCGATAATAATACTACCGCCGCACCCTTCTAACGCAAAGACTC     |        |        |        |        |        |               |
|                                                     | (29904)  | -----                                                                            |        |        |        |        |        |               |

## SARS-CoV-2 &amp; Autographa californica nucleopolyhedrovirus.apr

|                                                     |          |                                                                                |        |        |        |        |        |               |
|-----------------------------------------------------|----------|--------------------------------------------------------------------------------|--------|--------|--------|--------|--------|---------------|
|                                                     |          | Section 1618                                                                   |        |        |        |        |        |               |
| Autographa californica nucleopolyhedrovirus NC 0... | (124510) | 124510                                                                         | 124520 | 124531 | 124542 | 124553 | 124564 | 124575 124586 |
|                                                     | (124275) | GCAAAATCAACAATTCAATGTTTATGCTGAAAACTTTTACAAAGGTCTGCCGCTGTTCAAATCAAAGTACACGGTG   |        |        |        |        |        |               |
|                                                     | (29904)  | -----                                                                          |        |        |        |        |        |               |
|                                                     |          | Section 1619                                                                   |        |        |        |        |        |               |
| Autographa californica nucleopolyhedrovirus NC 0... | (124587) | 124587                                                                         | 124597 | 124608 | 124619 | 124630 | 124641 | 124652 124663 |
|                                                     | (124352) | GTGAACAGCACTAAAATCGTGACCCGAAAACCCAACGATATATTTAATGAGATAGATAAAGAATTAAATGGCAACTG  |        |        |        |        |        |               |
|                                                     | (29904)  | -----                                                                          |        |        |        |        |        |               |
|                                                     |          | Section 1620                                                                   |        |        |        |        |        |               |
| Autographa californica nucleopolyhedrovirus NC 0... | (124664) | 124664                                                                         | 124674 | 124685 | 124696 | 124707 | 124718 | 124729 124740 |
|                                                     | (124429) | TCCGTTTATCAAGTTTATTCAGCGCGACTACATATTCGACGCCAGTTTCCGCCAGATTGCTTGATTGCTAAACG     |        |        |        |        |        |               |
|                                                     | (29904)  | -----                                                                          |        |        |        |        |        |               |
|                                                     |          | Section 1621                                                                   |        |        |        |        |        |               |
| Autographa californica nucleopolyhedrovirus NC 0... | (124741) | 124741                                                                         | 124751 | 124762 | 124773 | 124784 | 124795 | 124806 124817 |
|                                                     | (124506) | AATACATGACCAAAAGCTCGATCATGAAAAATAATTACCAAGTTTGTGATTGAAGAAAACCCCGCTATGAGCGGTGAA |        |        |        |        |        |               |
|                                                     | (29904)  | -----                                                                          |        |        |        |        |        |               |
|                                                     |          | Section 1622                                                                   |        |        |        |        |        |               |
| Autographa californica nucleopolyhedrovirus NC 0... | (124818) | 124818                                                                         | 124828 | 124839 | 124850 | 124861 | 124872 | 124883 124894 |
|                                                     | (124583) | ATGTCTCGCGAGATTATTCTTGATCGCTACTCAGTAGACAATTATCGCAAGCTGTACATAAAAAATGGAAATAACCAA |        |        |        |        |        |               |
|                                                     | (29904)  | -----                                                                          |        |        |        |        |        |               |
|                                                     |          | Section 1623                                                                   |        |        |        |        |        |               |
| Autographa californica nucleopolyhedrovirus NC 0... | (124895) | 124895                                                                         | 124905 | 124916 | 124927 | 124938 | 124949 | 124960 124971 |
|                                                     | (124660) | CCAGTTTCTGTGTCATGTACGATCATGAATCGTCGTACATTTTGTGAGCAAAGACTTTTGAATTGAAAGGCACTA    |        |        |        |        |        |               |
|                                                     | (29904)  | -----                                                                          |        |        |        |        |        |               |
|                                                     |          | Section 1624                                                                   |        |        |        |        |        |               |
| Autographa californica nucleopolyhedrovirus NC 0... | (124972) | 124972                                                                         | 124982 | 124993 | 125004 | 125015 | 125026 | 125037 125048 |
|                                                     | (124737) | TGAACGCGTTCTACGCGCCCAAGCAGCGTATATTAAGTATTTGGCGGTGAATCGTTTGTGTTGGCGCCACGGAAACG  |        |        |        |        |        |               |
|                                                     | (29904)  | -----                                                                          |        |        |        |        |        |               |



## SARS-CoV-2 &amp; Autographa californica nucleopolyhedrovirus.apr

|                                                     |          |                                                                                |        |        |        |        |        |               |
|-----------------------------------------------------|----------|--------------------------------------------------------------------------------|--------|--------|--------|--------|--------|---------------|
|                                                     |          | Section 1625                                                                   |        |        |        |        |        |               |
| Autographa californica nucleopolyhedrovirus NC 0... | (125049) | 125049                                                                         | 125059 | 125070 | 125081 | 125092 | 125103 | 125114 125125 |
|                                                     | (124814) | ATCGACTTTCATCCCAACCTGCTCGTGTAACCGGCAGAGTTCGCCGCCGGTCCGTTTGACGGGCGACGTGTATGTTGT |        |        |        |        |        |               |
|                                                     | (29904)  | -----                                                                          |        |        |        |        |        |               |
|                                                     |          | Section 1626                                                                   |        |        |        |        |        |               |
| Autographa californica nucleopolyhedrovirus NC 0... | (125126) | 125126                                                                         | 125136 | 125147 | 125158 | 125169 | 125180 | 125191 125202 |
|                                                     | (124891) | TGATAAGAACGAAAAAGTTTTTTTGGTCAAACACGTGTTCTCAAACACGGTGCCTGCATATCTTTTAATAAGAGGTG  |        |        |        |        |        |               |
|                                                     | (29904)  | -----                                                                          |        |        |        |        |        |               |
|                                                     |          | Section 1627                                                                   |        |        |        |        |        |               |
| Autographa californica nucleopolyhedrovirus NC 0... | (125203) | 125203                                                                         | 125213 | 125224 | 125235 | 125246 | 125257 | 125268 125279 |
|                                                     | (124968) | ATTACGAAAGTTCGTCTGACTTGAAATCCCTTCGCGATTTGAATCCGTGGGTTTCAGAACACGCTTCTCAAATTATTA |        |        |        |        |        |               |
|                                                     | (29904)  | -----                                                                          |        |        |        |        |        |               |
|                                                     |          | Section 1628                                                                   |        |        |        |        |        |               |
| Autographa californica nucleopolyhedrovirus NC 0... | (125280) | 125280                                                                         | 125290 | 125301 | 125312 | 125323 | 125334 | 125345 125356 |
|                                                     | (125045) | ATCCCCGACTCGGTACAATAATATGATTTACTGATCCCACTACTGGCGCTACGACTAGCACAGACGTCGTCCTCGTC  |        |        |        |        |        |               |
|                                                     | (29904)  | -----                                                                          |        |        |        |        |        |               |
|                                                     |          | Section 1629                                                                   |        |        |        |        |        |               |
| Autographa californica nucleopolyhedrovirus NC 0... | (125357) | 125357                                                                         | 125367 | 125378 | 125389 | 125400 | 125411 | 125422 125433 |
|                                                     | (125122) | CACAAACTATTTAAACAGGCTAACTCCAAACATGTTCTTGACCATCTTGGCTGTAGTAGTAATTATTGCTTTAATAA  |        |        |        |        |        |               |
|                                                     | (29904)  | -----                                                                          |        |        |        |        |        |               |
|                                                     |          | Section 1630                                                                   |        |        |        |        |        |               |
| Autographa californica nucleopolyhedrovirus NC 0... | (125434) | 125434                                                                         | 125444 | 125455 | 125466 | 125477 | 125488 | 125499 125510 |
|                                                     | (125199) | TTATATTTGTTCAATCTAGCAGTAATGGAAACAGCTCGGGGGGTAATGTACCTCCAAACGCCCTGGGGGGTTTTGTA  |        |        |        |        |        |               |
|                                                     | (29904)  | -----                                                                          |        |        |        |        |        |               |
|                                                     |          | Section 1631                                                                   |        |        |        |        |        |               |
| Autographa californica nucleopolyhedrovirus NC 0... | (125511) | 125511                                                                         | 125521 | 125532 | 125543 | 125554 | 125565 | 125576 125587 |
|                                                     | (125276) | AATCCTTTAAACGCTACCATGCGAGCTAATCCCTTTATGAACACGCCTCAAAGGCAAATGTTGTAGATAAGTGTATA  |        |        |        |        |        |               |
|                                                     | (29904)  | -----                                                                          |        |        |        |        |        |               |

## SARS-CoV-2 &amp; Autographa californica nucleopolyhedrovirus.apr

|                                                     |          |                                                                                |        |        |        |        |        |               |
|-----------------------------------------------------|----------|--------------------------------------------------------------------------------|--------|--------|--------|--------|--------|---------------|
|                                                     |          | Section 1632                                                                   |        |        |        |        |        |               |
| Autographa californica nucleopolyhedrovirus NC 0... | (125588) | 125588                                                                         | 125598 | 125609 | 125620 | 125631 | 125642 | 125653 125664 |
|                                                     | (125353) | AAAAATGAAACGTATCAAATGCAACAAAGTTCTGAACGGTCACCGAGATTGTAAACAGCGATGAAAAATCCAAAAGA  |        |        |        |        |        |               |
|                                                     | (29904)  | -----                                                                          |        |        |        |        |        |               |
|                                                     |          | Section 1633                                                                   |        |        |        |        |        |               |
| Autographa californica nucleopolyhedrovirus NC 0... | (125665) | 125665                                                                         | 125675 | 125686 | 125697 | 125708 | 125719 | 125730 125741 |
|                                                     | (125430) | CCTACGAATTGGCTGAATTTGATTTAAAAAATCTAAGCAGTTTAGAAAGCTATGAAACTCTAAAAATTAAATTGGCG  |        |        |        |        |        |               |
|                                                     | (29904)  | -----                                                                          |        |        |        |        |        |               |
|                                                     |          | Section 1634                                                                   |        |        |        |        |        |               |
| Autographa californica nucleopolyhedrovirus NC 0... | (125742) | 125742                                                                         | 125752 | 125763 | 125774 | 125785 | 125796 | 125807 125818 |
|                                                     | (125507) | CTCAGCAAATACATGGCTATGCTCAGCACCCCTGGAAATGACTCAACCGCTGTTGGAAATATTTAGAAACAAAGCAGA |        |        |        |        |        |               |
|                                                     | (29904)  | -----                                                                          |        |        |        |        |        |               |
|                                                     |          | Section 1635                                                                   |        |        |        |        |        |               |
| Autographa californica nucleopolyhedrovirus NC 0... | (125819) | 125819                                                                         | 125829 | 125840 | 125851 | 125862 | 125873 | 125884 125895 |
|                                                     | (125584) | CACTCGGCAGATTGCCGCCGTGGTGTCTTAGCACATTAGCTTTTATACACAATAGATTCCATCCCCTTGTTACTAATT |        |        |        |        |        |               |
|                                                     | (29904)  | -----                                                                          |        |        |        |        |        |               |
|                                                     |          | Section 1636                                                                   |        |        |        |        |        |               |
| Autographa californica nucleopolyhedrovirus NC 0... | (125896) | 125896                                                                         | 125906 | 125917 | 125928 | 125939 | 125950 | 125961 125972 |
|                                                     | (125661) | TTACTAACAAAATGGAGTTTGTGGTCACTGAAACCAACGACACAAGCATTCCCGGAGAACCCATTTGTTTACGGAA   |        |        |        |        |        |               |
|                                                     | (29904)  | -----                                                                          |        |        |        |        |        |               |
|                                                     |          | Section 1637                                                                   |        |        |        |        |        |               |
| Autographa californica nucleopolyhedrovirus NC 0... | (125973) | 125973                                                                         | 125983 | 125994 | 126005 | 126016 | 126027 | 126038 126049 |
|                                                     | (125738) | AACGAAGGTGTGCTGCTGTGTTCCGTGGACAGACCGTCTATCGTTAAATGCTAAGCCGCGAGTTTGACACCGAGGC   |        |        |        |        |        |               |
|                                                     | (29904)  | -----                                                                          |        |        |        |        |        |               |
|                                                     |          | Section 1638                                                                   |        |        |        |        |        |               |
| Autographa californica nucleopolyhedrovirus NC 0... | (126050) | 126050                                                                         | 126060 | 126071 | 126082 | 126093 | 126104 | 126115 126126 |
|                                                     | (125815) | TTTAGTAACTTTGAAAACGACAACTGCAACGTGCGGATAGCCAAGACGTTTGGCGCCTCTAAGCGCAAAACACGA    |        |        |        |        |        |               |
|                                                     | (29904)  | -----                                                                          |        |        |        |        |        |               |

## SARS-CoV-2 &amp; Autographa californica nucleopolyhedrovirus.apr

|                                                     |          |                                                                               |        |        |        |        |        |               |
|-----------------------------------------------------|----------|-------------------------------------------------------------------------------|--------|--------|--------|--------|--------|---------------|
|                                                     |          | Section 1639                                                                  |        |        |        |        |        |               |
| Autographa californica nucleopolyhedrovirus NC 0... | (126127) | 126127                                                                        | 126137 | 126148 | 126159 | 126170 | 126181 | 126192 126203 |
|                                                     | (125892) | CGCGCAGCGATGATTACGAGTCAAATAAACACCCAATTACGATATGGATTTGAGCGATTTTAGCATAACTGAGGTT  |        |        |        |        |        |               |
|                                                     | (29904)  | -----                                                                         |        |        |        |        |        |               |
|                                                     |          | Section 1640                                                                  |        |        |        |        |        |               |
| Autographa californica nucleopolyhedrovirus NC 0... | (126204) | 126204                                                                        | 126214 | 126225 | 126236 | 126247 | 126258 | 126269 126280 |
|                                                     | (125969) | GAAGCCACTCAATATTTAACTCTGTTGCTGACCGTCGAACATGCCTATTTACATTATTATATTTTTAAAAATTACGG |        |        |        |        |        |               |
|                                                     | (29904)  | -----                                                                         |        |        |        |        |        |               |
|                                                     |          | Section 1641                                                                  |        |        |        |        |        |               |
| Autographa californica nucleopolyhedrovirus NC 0... | (126281) | 126281                                                                        | 126291 | 126302 | 126313 | 126324 | 126335 | 126346 126357 |
|                                                     | (126046) | GGTGTGTTGAATATTGCAAATCGCTAACGGACCATTGCTTTTTACCAACAAATTGCGATCGACAATGAGCACAAAA  |        |        |        |        |        |               |
|                                                     | (29904)  | -----                                                                         |        |        |        |        |        |               |
|                                                     |          | Section 1642                                                                  |        |        |        |        |        |               |
| Autographa californica nucleopolyhedrovirus NC 0... | (126358) | 126358                                                                        | 126368 | 126379 | 126390 | 126401 | 126412 | 126423 126434 |
|                                                     | (126123) | CGTCTAATTTACTGTTAAGCAAATTCAAATTTACCATTGAAGATTTTGACAAAATAAACTCAAATTCGTGAACATCA |        |        |        |        |        |               |
|                                                     | (29904)  | -----                                                                         |        |        |        |        |        |               |
|                                                     |          | Section 1643                                                                  |        |        |        |        |        |               |
| Autographa californica nucleopolyhedrovirus NC 0... | (126435) | 126435                                                                        | 126445 | 126456 | 126467 | 126478 | 126489 | 126500 126511 |
|                                                     | (126200) | GGGTTTAATATATATAATTTTAATAAATAATTAAATAATATACAATGTTTTTATTAATTATATTTTAATATTAATT  |        |        |        |        |        |               |
|                                                     | (29904)  | -----                                                                         |        |        |        |        |        |               |
|                                                     |          | Section 1644                                                                  |        |        |        |        |        |               |
| Autographa californica nucleopolyhedrovirus NC 0... | (126512) | 126512                                                                        | 126522 | 126533 | 126544 | 126555 | 126566 | 126577 126588 |
|                                                     | (126277) | AAAAGTATTAATATTTAAAAAAATGAATCAAATTCATCTAAAGTGTCACAGCGATAAAATTTGTCTAAAGGGTATT  |        |        |        |        |        |               |
|                                                     | (29904)  | -----                                                                         |        |        |        |        |        |               |
|                                                     |          | Section 1645                                                                  |        |        |        |        |        |               |
| Autographa californica nucleopolyhedrovirus NC 0... | (126589) | 126589                                                                        | 126599 | 126610 | 126621 | 126632 | 126643 | 126654 126665 |
|                                                     | (126354) | TTGGCCTCAACGCCGATCCCTATGATTGCACGGCGTATTATCTGTGTCCGCATAAAGTGCAAATGTTTTGCGAATTA |        |        |        |        |        |               |
|                                                     | (29904)  | -----                                                                         |        |        |        |        |        |               |

## SARS-CoV-2 &amp; Autographa californica nucleopolyhedrovirus.apr

|                                                     |          |                                                                                 |        |        |        |        |        |               |
|-----------------------------------------------------|----------|---------------------------------------------------------------------------------|--------|--------|--------|--------|--------|---------------|
|                                                     |          | Section 1646                                                                    |        |        |        |        |        |               |
| Autographa californica nucleopolyhedrovirus NC 0... | (126666) | 126666                                                                          | 126676 | 126687 | 126698 | 126709 | 126720 | 126731 126742 |
|                                                     | (126431) | AATCACGAATTTGACTTGGACTCCGCCAGCTGCAAGCCTATCGTGTACGATCACACGGGCAGCGGGTGTACGGCTCG   |        |        |        |        |        |               |
|                                                     | (29904)  | -----                                                                           |        |        |        |        |        |               |
|                                                     |          | Section 1647                                                                    |        |        |        |        |        |               |
| Autographa californica nucleopolyhedrovirus NC 0... | (126743) | 126743                                                                          | 126753 | 126764 | 126775 | 126786 | 126797 | 126808 126819 |
|                                                     | (126508) | CATGTATAGAACTTGTACTATGAAGAGCGGGTTCCAGTTGCACAACACTATTATCGATTTGCAGTTTCGGGACAT     |        |        |        |        |        |               |
|                                                     | (29904)  | -----                                                                           |        |        |        |        |        |               |
|                                                     |          | Section 1648                                                                    |        |        |        |        |        |               |
| Autographa californica nucleopolyhedrovirus NC 0... | (126820) | 126820                                                                          | 126830 | 126841 | 126852 | 126863 | 126874 | 126885 126896 |
|                                                     | (126585) | AAATGTTTAAATATATCGATGTCTTTGTGATGCGCGCGACATTTTGTAGGTTATTGATAAAATGAACGGATACGTT    |        |        |        |        |        |               |
|                                                     | (29904)  | -----                                                                           |        |        |        |        |        |               |
|                                                     |          | Section 1649                                                                    |        |        |        |        |        |               |
| Autographa californica nucleopolyhedrovirus NC 0... | (126897) | 126897                                                                          | 126907 | 126918 | 126929 | 126940 | 126951 | 126962 126973 |
|                                                     | (126662) | GCCCCGACATTATCATTAAATCCTTGCGGTAGAATTTGTCTGGGTCCATTGTCCGTGTGCGCTAGCATGCCCGTAACGG |        |        |        |        |        |               |
|                                                     | (29904)  | -----                                                                           |        |        |        |        |        |               |
|                                                     |          | Section 1650                                                                    |        |        |        |        |        |               |
| Autographa californica nucleopolyhedrovirus NC 0... | (126974) | 126974                                                                          | 126984 | 126995 | 127006 | 127017 | 127028 | 127039 127050 |
|                                                     | (126739) | ACCTCGTACTTTTGGCTTCAAAGGTTTTGCGCACAGACAAAATGTGCCACACTTGCAGCTCTGCATGTGTGCGCGTT   |        |        |        |        |        |               |
|                                                     | (29904)  | -----                                                                           |        |        |        |        |        |               |
|                                                     |          | Section 1651                                                                    |        |        |        |        |        |               |
| Autographa californica nucleopolyhedrovirus NC 0... | (127051) | 127051                                                                          | 127061 | 127072 | 127083 | 127094 | 127105 | 127116 127127 |
|                                                     | (126816) | ACCACAAATCCCAACGGCGCAGTGTAAGTTGTATGCAAATAAATCTCGATAAAGGCGGGCGCGCAATGCAGCT       |        |        |        |        |        |               |
|                                                     | (29904)  | -----                                                                           |        |        |        |        |        |               |
|                                                     |          | Section 1652                                                                    |        |        |        |        |        |               |
| Autographa californica nucleopolyhedrovirus NC 0... | (127128) | 127128                                                                          | 127138 | 127149 | 127160 | 127171 | 127182 | 127193 127204 |
|                                                     | (126893) | GATCAGTACGCTCCTCGTGTTCGGTTCAAGGACGGTGTATCGACCTCAGATTAATGTTTATCGGCCGACTGTTTT     |        |        |        |        |        |               |
|                                                     | (29904)  | -----                                                                           |        |        |        |        |        |               |

## SARS-CoV-2 &amp; Autographa californica nucleopolyhedrovirus.apr

|                                                     |          |                                                                                 |        |        |        |        |        |               |
|-----------------------------------------------------|----------|---------------------------------------------------------------------------------|--------|--------|--------|--------|--------|---------------|
|                                                     |          | Section 1653                                                                    |        |        |        |        |        |               |
| Autographa californica nucleopolyhedrovirus NC 0... | (127205) | 127205                                                                          | 127215 | 127226 | 127237 | 127248 | 127259 | 127270 127281 |
|                                                     | (126970) | CGTATCCGCTCACCAAACGCGTTTTTGCATTAACATTGTATGTCGGCGGATGTTCTATATCTAATTTGAATAAATAA   |        |        |        |        |        |               |
| SARS-CoV-2 NC_045512.2                              | (29904)  | -----                                                                           |        |        |        |        |        |               |
|                                                     |          | Section 1654                                                                    |        |        |        |        |        |               |
| Autographa californica nucleopolyhedrovirus NC 0... | (127282) | 127282                                                                          | 127292 | 127303 | 127314 | 127325 | 127336 | 127347 127358 |
|                                                     | (127047) | ACGATAACCGCGTTGGTTTTAGAGGGCATAATAAAAGAAATATTGTTATCGTGTTTCGCCATTAGGGCAGTATAAATT  |        |        |        |        |        |               |
| SARS-CoV-2 NC_045512.2                              | (29904)  | -----                                                                           |        |        |        |        |        |               |
|                                                     |          | Section 1655                                                                    |        |        |        |        |        |               |
| Autographa californica nucleopolyhedrovirus NC 0... | (127359) | 127359                                                                          | 127369 | 127380 | 127391 | 127402 | 127413 | 127424 127435 |
|                                                     | (127124) | GACGTTTCATGTTGGATATTGTTTCAGTTGCAAGTTGACACTGGCGGCGACAAGATCGTGAACAACCAAGTGACTATG  |        |        |        |        |        |               |
| SARS-CoV-2 NC_045512.2                              | (29904)  | -----                                                                           |        |        |        |        |        |               |
|                                                     |          | Section 1656                                                                    |        |        |        |        |        |               |
| Autographa californica nucleopolyhedrovirus NC 0... | (127436) | 127436                                                                          | 127446 | 127457 | 127468 | 127479 | 127490 | 127501 127512 |
|                                                     | (127201) | ACGCAAATTAATTTTAAACGCGTCGTACACCAGCGCTTCGACGCCGTCCCGAGCGTCGTTTCGACAACAGCTATTCAGA |        |        |        |        |        |               |
| SARS-CoV-2 NC_045512.2                              | (29904)  | -----                                                                           |        |        |        |        |        |               |
|                                                     |          | Section 1657                                                                    |        |        |        |        |        |               |
| Autographa californica nucleopolyhedrovirus NC 0... | (127513) | 127513                                                                          | 127523 | 127534 | 127545 | 127556 | 127567 | 127578 127589 |
|                                                     | (127278) | GTTTTGTGATAAAACAACCCAACGACTATTTAAGTTATTATAACCATCCCAACCCCGGATGGAGCCGACACGGTGATAT |        |        |        |        |        |               |
| SARS-CoV-2 NC_045512.2                              | (29904)  | -----                                                                           |        |        |        |        |        |               |
|                                                     |          | Section 1658                                                                    |        |        |        |        |        |               |
| Autographa californica nucleopolyhedrovirus NC 0... | (127590) | 127590                                                                          | 127600 | 127611 | 127622 | 127633 | 127644 | 127655 127666 |
|                                                     | (127355) | CTGACAGCGAGACTGCGGCAGCTTCAAACCTTTTGGCAAGCGTCAACTCGTTAACTGATAATGATTTAGTGGAATGT   |        |        |        |        |        |               |
| SARS-CoV-2 NC_045512.2                              | (29904)  | -----                                                                           |        |        |        |        |        |               |
|                                                     |          | Section 1659                                                                    |        |        |        |        |        |               |
| Autographa californica nucleopolyhedrovirus NC 0... | (127667) | 127667                                                                          | 127677 | 127688 | 127699 | 127710 | 127721 | 127732 127743 |
|                                                     | (127432) | TTGCTCAAGACCACTGATAATCTCGAAGAAGCAGTTAGTTCTGCTTATTATTCGGAATCCCTTGAGCAGCCTGTTGT   |        |        |        |        |        |               |
| SARS-CoV-2 NC_045512.2                              | (29904)  | -----                                                                           |        |        |        |        |        |               |

## SARS-CoV-2 &amp; Autographa californica nucleopolyhedrovirus.apr

|                                                     |          |                                                                                 |        |        |        |        |        |               |
|-----------------------------------------------------|----------|---------------------------------------------------------------------------------|--------|--------|--------|--------|--------|---------------|
|                                                     |          | Section 1660                                                                    |        |        |        |        |        |               |
| Autographa californica nucleopolyhedrovirus NC 0... | (127744) | 127744                                                                          | 127754 | 127765 | 127776 | 127787 | 127798 | 127809 127820 |
|                                                     | (127509) | GGAGCAACCATCGCCCAGTTCTGCTTATCATGCGGAATCTTTTGAGCATTCTGCTGGTGTGAACCAACCATCGGC     |        |        |        |        |        |               |
|                                                     | (29904)  | -----                                                                           |        |        |        |        |        |               |
|                                                     |          | Section 1661                                                                    |        |        |        |        |        |               |
| Autographa californica nucleopolyhedrovirus NC 0... | (127821) | 127821                                                                          | 127831 | 127842 | 127853 | 127864 | 127875 | 127886 127897 |
|                                                     | (127586) | CTGGAACTAAACGGAAGCTGGACGAATACTTGGACAATTCACAAGGTGTGGTGGGCCAGTTTAAACAAAATTAAATTG  |        |        |        |        |        |               |
|                                                     | (29904)  | -----                                                                           |        |        |        |        |        |               |
|                                                     |          | Section 1662                                                                    |        |        |        |        |        |               |
| Autographa californica nucleopolyhedrovirus NC 0... | (127898) | 127898                                                                          | 127908 | 127919 | 127930 | 127941 | 127952 | 127963 127974 |
|                                                     | (127663) | AGGCCTAAATACAAGAAAAGCACAAATTCAAAGCTGTGCAACCCTTGAACAGACAATTAATCACAAACACGAACATTTG |        |        |        |        |        |               |
|                                                     | (29904)  | -----                                                                           |        |        |        |        |        |               |
|                                                     |          | Section 1663                                                                    |        |        |        |        |        |               |
| Autographa californica nucleopolyhedrovirus NC 0... | (127975) | 127975                                                                          | 127985 | 127996 | 128007 | 128018 | 128029 | 128040 128051 |
|                                                     | (127740) | CACGGTCGCTTCAACTCAAGAAATTACGCATTATTTTACTAATGATTTTGCGCCGTATTTAATGCGTTTCGACGACA   |        |        |        |        |        |               |
|                                                     | (29904)  | -----                                                                           |        |        |        |        |        |               |
|                                                     |          | Section 1664                                                                    |        |        |        |        |        |               |
| Autographa californica nucleopolyhedrovirus NC 0... | (128052) | 128052                                                                          | 128062 | 128073 | 128084 | 128095 | 128106 | 128117 128128 |
|                                                     | (127817) | ACGACTACAATTCCAACAGGTTCTCCGACCATATGTCCGAAACTGGTTATTACATGTTTGTGGTTAAAAAAGTGAA    |        |        |        |        |        |               |
|                                                     | (29904)  | -----                                                                           |        |        |        |        |        |               |
|                                                     |          | Section 1665                                                                    |        |        |        |        |        |               |
| Autographa californica nucleopolyhedrovirus NC 0... | (128129) | 128129                                                                          | 128139 | 128150 | 128161 | 128172 | 128183 | 128194 128205 |
|                                                     | (127894) | GTGAAGCCGTTTGAAATTATATTTGCCAAGTACGTGAGCAATGTGGTTTACGAATATACAAACAATTATTACATGGT   |        |        |        |        |        |               |
|                                                     | (29904)  | -----                                                                           |        |        |        |        |        |               |
|                                                     |          | Section 1666                                                                    |        |        |        |        |        |               |
| Autographa californica nucleopolyhedrovirus NC 0... | (128206) | 128206                                                                          | 128216 | 128227 | 128238 | 128249 | 128260 | 128271 128282 |
|                                                     | (127971) | AGATAATCGCGTGTGTTGTGGTAACTTTTGATAAAATTAGGTTTATGATTTTCGTACAATTTGGTTAAAGAAACCGGCA |        |        |        |        |        |               |
|                                                     | (29904)  | -----                                                                           |        |        |        |        |        |               |

## SARS-CoV-2 &amp; Autographa californica nucleopolyhedrovirus.apr

|                                                     |          |                                                                                |        |        |        |        |        |               |
|-----------------------------------------------------|----------|--------------------------------------------------------------------------------|--------|--------|--------|--------|--------|---------------|
|                                                     |          | Section 1667                                                                   |        |        |        |        |        |               |
| Autographa californica nucleopolyhedrovirus NC 0... | (128283) | 128283                                                                         | 128293 | 128304 | 128315 | 128326 | 128337 | 128348 128359 |
|                                                     | (128048) | TAGAAATTCCTCATTCTCAAGATGTGTGCAACGACGAGACGGCTGCACAAAATTGTAAAAAATGCCATTTTCGTCGAT |        |        |        |        |        |               |
|                                                     | (29904)  | -----                                                                          |        |        |        |        |        |               |
|                                                     |          | Section 1668                                                                   |        |        |        |        |        |               |
| Autographa californica nucleopolyhedrovirus NC 0... | (128360) | 128360                                                                         | 128370 | 128381 | 128392 | 128403 | 128414 | 128425 128436 |
|                                                     | (128125) | GTGCACCACACGTTTTAAAGCTGCTCTGACTTCATATTTTAATTTAGATATGTATTACGCGCAAACACATTTGTGAC  |        |        |        |        |        |               |
|                                                     | (29904)  | -----                                                                          |        |        |        |        |        |               |
|                                                     |          | Section 1669                                                                   |        |        |        |        |        |               |
| Autographa californica nucleopolyhedrovirus NC 0... | (128437) | 128437                                                                         | 128447 | 128458 | 128469 | 128480 | 128491 | 128502 128513 |
|                                                     | (128202) | TTTGTTACAATCGTTGGGCGAAAGAAAATGTGGGTTTCTTTTGAGCAAGTTGTACGAAATGTATCAAGATAAAAATT  |        |        |        |        |        |               |
|                                                     | (29904)  | -----                                                                          |        |        |        |        |        |               |
|                                                     |          | Section 1670                                                                   |        |        |        |        |        |               |
| Autographa californica nucleopolyhedrovirus NC 0... | (128514) | 128514                                                                         | 128524 | 128535 | 128546 | 128557 | 128568 | 128579 128590 |
|                                                     | (128279) | TATTTACTTTGCCTATTATGCTTAGTCGTAAAGAGAGTAATGAAATTGAGACTGCATCTAATAATTTCTTTGTATCG  |        |        |        |        |        |               |
|                                                     | (29904)  | -----                                                                          |        |        |        |        |        |               |
|                                                     |          | Section 1671                                                                   |        |        |        |        |        |               |
| Autographa californica nucleopolyhedrovirus NC 0... | (128591) | 128591                                                                         | 128601 | 128612 | 128623 | 128634 | 128645 | 128656 128667 |
|                                                     | (128356) | CCGTATGTGAGTCAAATATTAAAGTATTCGGAAAGTGTGCAGTTTCCCGACAATCCCCCAAACAAATATGTGGTGGA  |        |        |        |        |        |               |
|                                                     | (29904)  | -----                                                                          |        |        |        |        |        |               |
|                                                     |          | Section 1672                                                                   |        |        |        |        |        |               |
| Autographa californica nucleopolyhedrovirus NC 0... | (128668) | 128668                                                                         | 128678 | 128689 | 128700 | 128711 | 128722 | 128733 128744 |
|                                                     | (128433) | CAATTTAAATTTAATTGTAAACAAAAAAGTACGCTCACGTACAAATACAGCAGCGTCGCTAATCTTTTGTTTAATA   |        |        |        |        |        |               |
|                                                     | (29904)  | -----                                                                          |        |        |        |        |        |               |
|                                                     |          | Section 1673                                                                   |        |        |        |        |        |               |
| Autographa californica nucleopolyhedrovirus NC 0... | (128745) | 128745                                                                         | 128755 | 128766 | 128777 | 128788 | 128799 | 128810 128821 |
|                                                     | (128510) | ATTATAAATATCATGACAATATTGCGAGTAATAATAACGCAGAAAATTTAAAAAAGGTTAAGAAGGAGGACGGCAGC  |        |        |        |        |        |               |
|                                                     | (29904)  | -----                                                                          |        |        |        |        |        |               |

## SARS-CoV-2 &amp; Autographa californica nucleopolyhedrovirus.apr

|                                                     |          |                                                                                |        |        |        |        |        |               |
|-----------------------------------------------------|----------|--------------------------------------------------------------------------------|--------|--------|--------|--------|--------|---------------|
|                                                     |          | Section 1674                                                                   |        |        |        |        |        |               |
| Autographa californica nucleopolyhedrovirus NC 0... | (128822) | 128822                                                                         | 128832 | 128843 | 128854 | 128865 | 128876 | 128887 128898 |
|                                                     | (128587) | ATGCACATTGTCGAACAGTATTTGACTCAGAAATGTAGATAATGTAAAGGGTCACAATTTTATAGTATTGTCTTTCAA |        |        |        |        |        |               |
|                                                     | (29904)  | -----                                                                          |        |        |        |        |        |               |
|                                                     |          | Section 1675                                                                   |        |        |        |        |        |               |
| Autographa californica nucleopolyhedrovirus NC 0... | (128899) | 128899                                                                         | 128909 | 128920 | 128931 | 128942 | 128953 | 128964 128975 |
|                                                     | (128664) | AAACGAGGAGCGATTGACTATAGCTAAGAAAAACAAAGAGTTTTATTGGATTTCTGGCGAAATTAAAGATGTAGACG  |        |        |        |        |        |               |
|                                                     | (29904)  | -----                                                                          |        |        |        |        |        |               |
|                                                     |          | Section 1676                                                                   |        |        |        |        |        |               |
| Autographa californica nucleopolyhedrovirus NC 0... | (128976) | 128976                                                                         | 128986 | 128997 | 129008 | 129019 | 129030 | 129041 129052 |
|                                                     | (128741) | TTAGTCAAGTAATTCAAAAATATAATAGATTTAAGCATCACATGTTTGTAATCGGTAAAGTGAACCGAAGAGAGAGC  |        |        |        |        |        |               |
|                                                     | (29904)  | -----                                                                          |        |        |        |        |        |               |
|                                                     |          | Section 1677                                                                   |        |        |        |        |        |               |
| Autographa californica nucleopolyhedrovirus NC 0... | (129053) | 129053                                                                         | 129063 | 129074 | 129085 | 129096 | 129107 | 129118 129129 |
|                                                     | (128818) | ACTACATTGCACAATAATTTGTTAAAAATTGTTAGCTTTAATATTACAGGGTCTGGTTCCGTTGTCCGACGCTATAAC |        |        |        |        |        |               |
|                                                     | (29904)  | -----                                                                          |        |        |        |        |        |               |
|                                                     |          | Section 1678                                                                   |        |        |        |        |        |               |
| Autographa californica nucleopolyhedrovirus NC 0... | (129130) | 129130                                                                         | 129140 | 129151 | 129162 | 129173 | 129184 | 129195 129206 |
|                                                     | (128895) | GTTTGCGGAACAAAACTAAATTGTAAATATAAAAAATTGCAATTTAATTAATTATACATATATTTTGAATTTAATT   |        |        |        |        |        |               |
|                                                     | (29904)  | -----                                                                          |        |        |        |        |        |               |
|                                                     |          | Section 1679                                                                   |        |        |        |        |        |               |
| Autographa californica nucleopolyhedrovirus NC 0... | (129207) | 129207                                                                         | 129217 | 129228 | 129239 | 129250 | 129261 | 129272 129283 |
|                                                     | (128972) | AATTATACATATATTTTATATTATTTTGTCTTTTATTATCGAGGGGCCGTTGTTGGTGTGGGGTTTGCATAGAAA    |        |        |        |        |        |               |
|                                                     | (29904)  | -----                                                                          |        |        |        |        |        |               |
|                                                     |          | Section 1680                                                                   |        |        |        |        |        |               |
| Autographa californica nucleopolyhedrovirus NC 0... | (129284) | 129284                                                                         | 129294 | 129305 | 129316 | 129327 | 129338 | 129349 129360 |
|                                                     | (129049) | TAACAATGGGAGTTGGCGACGTTGCTGCGCCAACACCACCTCCTCCTCCTTTTCATCATGTATCTGTAGATAAAA    |        |        |        |        |        |               |
|                                                     | (29904)  | -----                                                                          |        |        |        |        |        |               |



## SARS-CoV-2 &amp; Autographa californica nucleopolyhedrovirus.apr

|                                                     |          |                                                                                |        |        |        |        |        |               |
|-----------------------------------------------------|----------|--------------------------------------------------------------------------------|--------|--------|--------|--------|--------|---------------|
|                                                     |          | Section 1681                                                                   |        |        |        |        |        |               |
| Autographa californica nucleopolyhedrovirus NC 0... | (129361) | 129361                                                                         | 129371 | 129382 | 129393 | 129404 | 129415 | 129426 129437 |
|                                                     | (129126) | TAAATATTAAACCTAAAAACAAGACCGCGCTATCAACAAAATGATAGGCATTAACCTGCCGCTGACGCTGTCACT    |        |        |        |        |        |               |
|                                                     | (29904)  | -----                                                                          |        |        |        |        |        |               |
|                                                     |          | Section 1682                                                                   |        |        |        |        |        |               |
| Autographa californica nucleopolyhedrovirus NC 0... | (129438) | 129438                                                                         | 129448 | 129459 | 129470 | 129481 | 129492 | 129503 129514 |
|                                                     | (129203) | AACGTTGGACGATTTGCCGACTAAACCTTCATCGCCAGTAACCAATCTAGACCCAAGTCGCCAACTAAATCACCAA   |        |        |        |        |        |               |
|                                                     | (29904)  | -----                                                                          |        |        |        |        |        |               |
|                                                     |          | Section 1683                                                                   |        |        |        |        |        |               |
| Autographa californica nucleopolyhedrovirus NC 0... | (129515) | 129515                                                                         | 129525 | 129536 | 129547 | 129558 | 129569 | 129580 129591 |
|                                                     | (129280) | ACGAGTAAGGTTTCGATGCACATGAGTGTTTGGCCCGCAGGAAGATCGCTAATATCTACGTATTGAGGCGAATCTGGG |        |        |        |        |        |               |
|                                                     | (29904)  | -----                                                                          |        |        |        |        |        |               |
|                                                     |          | Section 1684                                                                   |        |        |        |        |        |               |
| Autographa californica nucleopolyhedrovirus NC 0... | (129592) | 129592                                                                         | 129602 | 129613 | 129624 | 129635 | 129646 | 129657 129668 |
|                                                     | (129357) | TCGGCGGACGGATCGCTGCCGCGACAACTGTTTTTCTACTTCATAGTTGAATCCTTGGCACATGTTGGTTAGTTC    |        |        |        |        |        |               |
|                                                     | (29904)  | -----                                                                          |        |        |        |        |        |               |
|                                                     |          | Section 1685                                                                   |        |        |        |        |        |               |
| Autographa californica nucleopolyhedrovirus NC 0... | (129669) | 129669                                                                         | 129679 | 129690 | 129701 | 129712 | 129723 | 129734 129745 |
|                                                     | (129434) | GGGCGGATTGTTAGGCAACAAGGGGTCGAATGGGCAATGGTAACATCCGACTGATTTAGATTGGGGTCTTGACGAC   |        |        |        |        |        |               |
|                                                     | (29904)  | -----                                                                          |        |        |        |        |        |               |
|                                                     |          | Section 1686                                                                   |        |        |        |        |        |               |
| Autographa californica nucleopolyhedrovirus NC 0... | (129746) | 129746                                                                         | 129756 | 129767 | 129778 | 129789 | 129800 | 129811 129822 |
|                                                     | (129511) | AAGTGCCTGCAATAACAAGCAGGCCTCGGCGATTTCTCCGGCGTCTTACCTTGACATAATAACTTCCGCGGTG      |        |        |        |        |        |               |
|                                                     | (29904)  | -----                                                                          |        |        |        |        |        |               |
|                                                     |          | Section 1687                                                                   |        |        |        |        |        |               |
| Autographa californica nucleopolyhedrovirus NC 0... | (129823) | 129823                                                                         | 129833 | 129844 | 129855 | 129866 | 129877 | 129888 129899 |
|                                                     | (129588) | TTATTGATGGCGTTGATTATATCTTGTAAGTAGTGTGGCGGCGCTAAACAAGAAATAGCCGCCGGTGGCCAAGAGTAT |        |        |        |        |        |               |
|                                                     | (29904)  | -----                                                                          |        |        |        |        |        |               |

## SARS-CoV-2 &amp; Autographa californica nucleopolyhedrovirus.apr

|                                                     |          |                                                                                  |        |        |        |        |        |               |
|-----------------------------------------------------|----------|----------------------------------------------------------------------------------|--------|--------|--------|--------|--------|---------------|
|                                                     |          | Section 1688                                                                     |        |        |        |        |        |               |
| Autographa californica nucleopolyhedrovirus NC 0... | (129900) | 129900                                                                           | 129910 | 129921 | 129932 | 129943 | 129954 | 129965 129976 |
|                                                     | (129665) | GCCCCGTTCCCTCCTACTTTTAAAGCTTTGCATGTAAGTATGTAGACGGGGGTTTTGCTGCAGTGCCTTTTGAACACCTT |        |        |        |        |        |               |
|                                                     | (29904)  | -----                                                                            |        |        |        |        |        |               |
|                                                     |          | Section 1689                                                                     |        |        |        |        |        |               |
| Autographa californica nucleopolyhedrovirus NC 0... | (129977) | 129977                                                                           | 129987 | 129998 | 130009 | 130020 | 130031 | 130042 130053 |
|                                                     | (129742) | CGGGCGTGCGCACGTTGGTTTCCGGGAAGTTTGTGTTGACTGCATTGGATCGCGTCTGCTTGGTGTGGTAATTAAAG    |        |        |        |        |        |               |
|                                                     | (29904)  | -----                                                                            |        |        |        |        |        |               |
|                                                     |          | Section 1690                                                                     |        |        |        |        |        |               |
| Autographa californica nucleopolyhedrovirus NC 0... | (130054) | 130054                                                                           | 130064 | 130075 | 130086 | 130097 | 130108 | 130119 130130 |
|                                                     | (129819) | TCTGGCACGTTGTCCACGCGCCGCAATTGGCTCAATGAGTTTATTTGAGGGTCTGAAATGCCCTGAAATACTCCGCG    |        |        |        |        |        |               |
|                                                     | (29904)  | -----                                                                            |        |        |        |        |        |               |
|                                                     |          | Section 1691                                                                     |        |        |        |        |        |               |
| Autographa californica nucleopolyhedrovirus NC 0... | (130131) | 130131                                                                           | 130141 | 130152 | 130163 | 130174 | 130185 | 130196 130207 |
|                                                     | (129896) | TATGTTGGGGACATCATTGTTACGAGTAATTCTGTTTATGTCTGAAGTGCTCACAACTGGTTGTTAGATAGTTGAT     |        |        |        |        |        |               |
|                                                     | (29904)  | -----                                                                            |        |        |        |        |        |               |
|                                                     |          | Section 1692                                                                     |        |        |        |        |        |               |
| Autographa californica nucleopolyhedrovirus NC 0... | (130208) | 130208                                                                           | 130218 | 130229 | 130240 | 130251 | 130262 | 130273 130284 |
|                                                     | (129973) | AGCCCCGGCTGAAATCTGTTGTTTCCAATGTTGCGTACACTGGGCGCGTTGAGCACATTTGTGAAACCGGCGGGAGTG   |        |        |        |        |        |               |
|                                                     | (29904)  | -----                                                                            |        |        |        |        |        |               |
|                                                     |          | Section 1693                                                                     |        |        |        |        |        |               |
| Autographa californica nucleopolyhedrovirus NC 0... | (130285) | 130285                                                                           | 130295 | 130306 | 130317 | 130328 | 130339 | 130350 130361 |
|                                                     | (130050) | CTTGTTAAAAGACGCGTATTATCAGTAATAAACTGGCCTGATTAGGATACAATTTATTGACTGCGCGAAGATTGA      |        |        |        |        |        |               |
|                                                     | (29904)  | -----                                                                            |        |        |        |        |        |               |
|                                                     |          | Section 1694                                                                     |        |        |        |        |        |               |
| Autographa californica nucleopolyhedrovirus NC 0... | (130362) | 130362                                                                           | 130372 | 130383 | 130394 | 130405 | 130416 | 130427 130438 |
|                                                     | (130177) | AAAAAACTCATTTTAAAGCAAACCTATTTAATAAATATATCACAGTAAAGGTTTTGCAAACTGCCGTCGTCAATA      |        |        |        |        |        |               |
|                                                     | (29904)  | -----                                                                            |        |        |        |        |        |               |

## SARS-CoV-2 &amp; Autographa californica nucleopolyhedrovirus.apr

|                                                     |          |                                                                                 |        |        |        |        |        |               |
|-----------------------------------------------------|----------|---------------------------------------------------------------------------------|--------|--------|--------|--------|--------|---------------|
|                                                     |          | Section 1695                                                                    |        |        |        |        |        |               |
| Autographa californica nucleopolyhedrovirus NC 0... | (130439) | 130439                                                                          | 130449 | 130460 | 130471 | 130482 | 130493 | 130504 130515 |
|                                                     | (130204) | CAACACGGCAGCGGCGTCATGTTGGTAAATCTAATCTTCTCCTTGCTTTAGATTCTGGGCGAGAAGGCGCATTGT     |        |        |        |        |        |               |
|                                                     | (29904)  | -----                                                                           |        |        |        |        |        |               |
|                                                     |          | Section 1696                                                                    |        |        |        |        |        |               |
| Autographa californica nucleopolyhedrovirus NC 0... | (130516) | 130516                                                                          | 130526 | 130537 | 130548 | 130559 | 130570 | 130581 130592 |
|                                                     | (130281) | TGTGTAAGTTATTTTCGACGTCTGCATTATTTGTTGTGTAAGGTATCTCGACGTATGAAGCAACTTTAACATTGTTAT  |        |        |        |        |        |               |
|                                                     | (29904)  | -----                                                                           |        |        |        |        |        |               |
|                                                     |          | Section 1697                                                                    |        |        |        |        |        |               |
| Autographa californica nucleopolyhedrovirus NC 0... | (130593) | 130593                                                                          | 130603 | 130614 | 130625 | 130636 | 130647 | 130658 130669 |
|                                                     | (130358) | AATTTTTTTTTTAAATATTGATGCGCTCCACGGCGCGCGTTGATACGGATGATATCTCTCCATTGTATGATCGCTAAAT |        |        |        |        |        |               |
|                                                     | (29904)  | -----                                                                           |        |        |        |        |        |               |
|                                                     |          | Section 1698                                                                    |        |        |        |        |        |               |
| Autographa californica nucleopolyhedrovirus NC 0... | (130670) | 130670                                                                          | 130680 | 130691 | 130702 | 130713 | 130724 | 130735 130746 |
|                                                     | (130435) | TTATATACCGTTTCAATAAATATGTTAAACCCAACATGTTAATTATAATATTCATAATAGTTTGTTTGTTCAT       |        |        |        |        |        |               |
|                                                     | (29904)  | -----                                                                           |        |        |        |        |        |               |
|                                                     |          | Section 1699                                                                    |        |        |        |        |        |               |
| Autographa californica nucleopolyhedrovirus NC 0... | (130747) | 130747                                                                          | 130757 | 130768 | 130779 | 130790 | 130801 | 130812 130823 |
|                                                     | (130512) | AATTATTTTTACTGTTTTGAAATCTAAAAAGAGGTGACGATGACGAATCAGACGACGGGTTTCAGTTGCTATAACAAAC |        |        |        |        |        |               |
|                                                     | (29904)  | -----                                                                           |        |        |        |        |        |               |
|                                                     |          | Section 1700                                                                    |        |        |        |        |        |               |
| Autographa californica nucleopolyhedrovirus NC 0... | (130824) | 130824                                                                          | 130834 | 130845 | 130856 | 130867 | 130878 | 130889 130900 |
|                                                     | (130589) | CAATTGGAGTAAATTTTCCGCATCCTACTAGATGTGACGCTTCTACATGTGTGTCGGTTTAAATCAAAAATTAGAG    |        |        |        |        |        |               |
|                                                     | (29904)  | -----                                                                           |        |        |        |        |        |               |
|                                                     |          | Section 1701                                                                    |        |        |        |        |        |               |
| Autographa californica nucleopolyhedrovirus NC 0... | (130901) | 130901                                                                          | 130911 | 130922 | 130933 | 130944 | 130955 | 130966 130977 |
|                                                     | (130666) | TTAATCTGCCCTGAAGGATTTGAATTTGATCCAGATGTTAAAAATTGTGTTTCCTATATCAGATTATGGATGTACCGC  |        |        |        |        |        |               |
|                                                     | (29904)  | -----                                                                           |        |        |        |        |        |               |

## SARS-CoV-2 &amp; Autographa californica nucleopolyhedrovirus.apr

|                                                     |          |                                                                                 |        |        |        |        |        |               |
|-----------------------------------------------------|----------|---------------------------------------------------------------------------------|--------|--------|--------|--------|--------|---------------|
|                                                     |          | Section 1702                                                                    |        |        |        |        |        |               |
| Autographa californica nucleopolyhedrovirus NC 0... | (130978) | 130978                                                                          | 130988 | 130999 | 131010 | 131021 | 131032 | 131043 131054 |
|                                                     | (130743) | TAACCAAACCTAAAAATAAAATAAAATTTATATAGATTAATGAAATAAAATTTATATAGATTAATAAAATAAAATTT   |        |        |        |        |        |               |
|                                                     | (29904)  | -----                                                                           |        |        |        |        |        |               |
|                                                     |          | Section 1703                                                                    |        |        |        |        |        |               |
| Autographa californica nucleopolyhedrovirus NC 0... | (131055) | 131055                                                                          | 131065 | 131076 | 131087 | 131098 | 131109 | 131120 131131 |
|                                                     | (130870) | ATTTAATATATTATACATTTTATATTATTTACAACACTTAACGTCTAGACATAACAGTTTGTAACCTTAGAACTAA    |        |        |        |        |        |               |
|                                                     | (29904)  | -----                                                                           |        |        |        |        |        |               |
|                                                     |          | Section 1704                                                                    |        |        |        |        |        |               |
| Autographa californica nucleopolyhedrovirus NC 0... | (131132) | 131132                                                                          | 131142 | 131153 | 131164 | 131175 | 131186 | 131197 131208 |
|                                                     | (130897) | TCAGAGTTACTGCGCTCAAACCTCTGAAAAATTTGGCTTGAGACTCGGCCACCTGCTTACGCAATTGTTCTTGCAGATT |        |        |        |        |        |               |
|                                                     | (29904)  | -----                                                                           |        |        |        |        |        |               |
|                                                     |          | Section 1705                                                                    |        |        |        |        |        |               |
| Autographa californica nucleopolyhedrovirus NC 0... | (131209) | 131209                                                                          | 131219 | 131230 | 131241 | 131252 | 131263 | 131274 131285 |
|                                                     | (130974) | ATTCACAGTCGATTGCAACTCTTCTGATTTCTTGGTAGATTCTTGCAAGTCATAGTTTGCCTTTTGTAATCTAATT    |        |        |        |        |        |               |
|                                                     | (29904)  | -----                                                                           |        |        |        |        |        |               |
|                                                     |          | Section 1706                                                                    |        |        |        |        |        |               |
| Autographa californica nucleopolyhedrovirus NC 0... | (131286) | 131286                                                                          | 131296 | 131307 | 131318 | 131329 | 131340 | 131351 131362 |
|                                                     | (131051) | CGGCGACAGCATGCTTGTGTTTAAGCATAATGTAGTCGCTGTTTAACATGGTCATTTTATGTTCAACTTGGCTGGTC   |        |        |        |        |        |               |
|                                                     | (29904)  | -----                                                                           |        |        |        |        |        |               |
|                                                     |          | Section 1707                                                                    |        |        |        |        |        |               |
| Autographa californica nucleopolyhedrovirus NC 0... | (131363) | 131363                                                                          | 131373 | 131384 | 131395 | 131406 | 131417 | 131428 131439 |
|                                                     | (131128) | TTGGCTCGCAGCTCGGACAGTTCTTTTTGCAATTGCTCCACATAGTTCAAGTCCGTGGTGTGATTGTTGACCGTGTT   |        |        |        |        |        |               |
|                                                     | (29904)  | -----                                                                           |        |        |        |        |        |               |
|                                                     |          | Section 1708                                                                    |        |        |        |        |        |               |
| Autographa californica nucleopolyhedrovirus NC 0... | (131440) | 131440                                                                          | 131450 | 131461 | 131472 | 131483 | 131494 | 131505 131516 |
|                                                     | (131205) | ATTTTCTAAAAGCTCGCGCCAATGCTGTTTGATGGAATCCTGGTTACGAGTGACGTTAATGGGCATAAATTCTACAT   |        |        |        |        |        |               |
|                                                     | (29904)  | -----                                                                           |        |        |        |        |        |               |

## SARS-CoV-2 &amp; Autographa californica nucleopolyhedrovirus.apr

|                                                     |          |                                                                                |        |        |        |        |        |               |
|-----------------------------------------------------|----------|--------------------------------------------------------------------------------|--------|--------|--------|--------|--------|---------------|
|                                                     |          | Section 1709                                                                   |        |        |        |        |        |               |
| Autographa californica nucleopolyhedrovirus NC 0... | (131517) | 131517                                                                         | 131527 | 131538 | 131549 | 131560 | 131571 | 131582 131593 |
|                                                     | (131282) | ACCCGTGCTTATTGTACACGCGACAATCTGATGAAGTAGCGCTGCAAAAACATTGTACACAGAATTGTCCATAATT   |        |        |        |        |        |               |
|                                                     | (29904)  | -----                                                                          |        |        |        |        |        |               |
|                                                     |          | Section 1710                                                                   |        |        |        |        |        |               |
| Autographa californica nucleopolyhedrovirus NC 0... | (131594) | 131594                                                                         | 131604 | 131615 | 131626 | 131637 | 131648 | 131659 131670 |
|                                                     | (131359) | ATCTTGACATAACACTTGAAACACACAGCATGGTTACAATGAATCGAAGTCACAAACGAGGAATTTACGTTTTTAGT  |        |        |        |        |        |               |
|                                                     | (29904)  | -----                                                                          |        |        |        |        |        |               |
|                                                     |          | Section 1711                                                                   |        |        |        |        |        |               |
| Autographa californica nucleopolyhedrovirus NC 0... | (131671) | 131671                                                                         | 131681 | 131692 | 131703 | 131714 | 131725 | 131736 131747 |
|                                                     | (131436) | GTCTTTAAAAGTAGTAAAACAAATATTACACGAAACCTCTACTTCTTCTTCGGGTTCTGATTGCTGCTGCTGCTGCT  |        |        |        |        |        |               |
|                                                     | (29904)  | -----                                                                          |        |        |        |        |        |               |
|                                                     |          | Section 1712                                                                   |        |        |        |        |        |               |
| Autographa californica nucleopolyhedrovirus NC 0... | (131748) | 131748                                                                         | 131758 | 131769 | 131780 | 131791 | 131802 | 131813 131824 |
|                                                     | (131513) | GCTGCGGCTGCGGAGACTGCGGCGAGGCAAACAAATCTGGCGACTGTGGTATTACGTAATTCGGCGAATAAGATGGA  |        |        |        |        |        |               |
|                                                     | (29904)  | -----                                                                          |        |        |        |        |        |               |
|                                                     |          | Section 1713                                                                   |        |        |        |        |        |               |
| Autographa californica nucleopolyhedrovirus NC 0... | (131825) | 131825                                                                         | 131835 | 131846 | 131857 | 131868 | 131879 | 131890 131901 |
|                                                     | (131590) | CTATAAGTGGGAGACCTTGGGGCAATCTCATTTCATCAGCTGAGCCTCAAGATCTAAACCTCGTTGCAGAGCCCTCTG |        |        |        |        |        |               |
|                                                     | (29904)  | -----                                                                          |        |        |        |        |        |               |
|                                                     |          | Section 1714                                                                   |        |        |        |        |        |               |
| Autographa californica nucleopolyhedrovirus NC 0... | (131902) | 131902                                                                         | 131912 | 131923 | 131934 | 131945 | 131956 | 131967 131978 |
|                                                     | (131667) | CGCAGCTGTCTCCGACGCAATGTTATCCTGGTACTGCTGGGCAGTGATGTCGGGAAACCGTTCACGATCCACATTTT  |        |        |        |        |        |               |
|                                                     | (29904)  | -----                                                                          |        |        |        |        |        |               |
|                                                     |          | Section 1715                                                                   |        |        |        |        |        |               |
| Autographa californica nucleopolyhedrovirus NC 0... | (131979) | 131979                                                                         | 131989 | 132000 | 132011 | 132022 | 132033 | 132044 132055 |
|                                                     | (131744) | CACTATTAATTAGTATGACGTCATCCTCTTGACTTAATAGCGGATCGTCATTGCTAATGTTAACCTGACCGTGCACG  |        |        |        |        |        |               |
|                                                     | (29904)  | -----                                                                          |        |        |        |        |        |               |

## SARS-CoV-2 &amp; Autographa californica nucleopolyhedrovirus.apr

|                                                     |          |                                                                                |        |        |        |        |        |               |
|-----------------------------------------------------|----------|--------------------------------------------------------------------------------|--------|--------|--------|--------|--------|---------------|
|                                                     |          | Section 1716                                                                   |        |        |        |        |        |               |
| Autographa californica nucleopolyhedrovirus NC 0... | (132056) | 132056                                                                         | 132066 | 132077 | 132088 | 132099 | 132110 | 132121 132132 |
|                                                     | (131821) | TAATACGTGACACCCTGACGATGGTAGGTGCGCGTCAACGGCTCGTTGACGTTCCCGATAATCTGCACGTTTTCTTC  |        |        |        |        |        |               |
|                                                     | (29904)  | -----                                                                          |        |        |        |        |        |               |
|                                                     |          | Section 1717                                                                   |        |        |        |        |        |               |
| Autographa californica nucleopolyhedrovirus NC 0... | (132133) | 132133                                                                         | 132143 | 132154 | 132165 | 132176 | 132187 | 132198 132209 |
|                                                     | (131898) | GCTGACACGCTGCTCCTGACGCCGCTCCTGACGGCGATGGCTGCGACTGCTTGAAGACGGCTGGCTGCGACTGCTTG  |        |        |        |        |        |               |
|                                                     | (29904)  | -----                                                                          |        |        |        |        |        |               |
|                                                     |          | Section 1718                                                                   |        |        |        |        |        |               |
| Autographa californica nucleopolyhedrovirus NC 0... | (132210) | 132210                                                                         | 132220 | 132231 | 132242 | 132253 | 132264 | 132275 132286 |
|                                                     | (131975) | AAGACGGCTGGGCTTCGGGAGATGTTGTAAAGTTGATGCGCGACGGCTGAGAGACAGCCTGTGGCGGCGGCTGCTG   |        |        |        |        |        |               |
|                                                     | (29904)  | -----                                                                          |        |        |        |        |        |               |
|                                                     |          | Section 1719                                                                   |        |        |        |        |        |               |
| Autographa californica nucleopolyhedrovirus NC 0... | (132287) | 132287                                                                         | 132297 | 132308 | 132319 | 132330 | 132341 | 132352 132363 |
|                                                     | (132052) | CTGGGAGTGCGGCGGCTTGATTTGGCGACTCATGGCTGGGCTGGTAGGATACTGTTCACTAGGCTGTGAGGCTTGAAC |        |        |        |        |        |               |
|                                                     | (29904)  | -----                                                                          |        |        |        |        |        |               |
|                                                     |          | Section 1720                                                                   |        |        |        |        |        |               |
| Autographa californica nucleopolyhedrovirus NC 0... | (132364) | 132364                                                                         | 132374 | 132385 | 132396 | 132407 | 132418 | 132429 132440 |
|                                                     | (132129) | TGTGCTTACGAGTAGAACGGCAGCTGTATTTATACTGTTTATCAGTACTGCACGACTGATAAGACAATAGTGGTGGG  |        |        |        |        |        |               |
|                                                     | (29904)  | -----                                                                          |        |        |        |        |        |               |
|                                                     |          | Section 1721                                                                   |        |        |        |        |        |               |
| Autographa californica nucleopolyhedrovirus NC 0... | (132441) | 132441                                                                         | 132451 | 132462 | 132473 | 132484 | 132495 | 132506 132517 |
|                                                     | (132206) | GGAACCTGCCAGGCCAAAAATGAACTTTTTTGTAATGCAAAAAAGTTGATAGTGTAGTAGTATATTGGGAGCGTATCG |        |        |        |        |        |               |
|                                                     | (29904)  | -----                                                                          |        |        |        |        |        |               |
|                                                     |          | Section 1722                                                                   |        |        |        |        |        |               |
| Autographa californica nucleopolyhedrovirus NC 0... | (132518) | 132518                                                                         | 132528 | 132539 | 132550 | 132561 | 132572 | 132583 132594 |
|                                                     | (132283) | TACAGTGTAGACTATTCTAATAAAATAGTCTACGATTTGTAGAGATTGTACTGTATATGGAGTGTGAGGCAAAAGTG  |        |        |        |        |        |               |
|                                                     | (29904)  | -----                                                                          |        |        |        |        |        |               |

## SARS-CoV-2 &amp; Autographa californica nucleopolyhedrovirus.apr

|                                                     |          |                                                                                |        |        |        |        |        |               |
|-----------------------------------------------------|----------|--------------------------------------------------------------------------------|--------|--------|--------|--------|--------|---------------|
|                                                     |          | Section 1723                                                                   |        |        |        |        |        |               |
| Autographa californica nucleopolyhedrovirus NC 0... | (132595) | 132595                                                                         | 132605 | 132616 | 132627 | 132638 | 132649 | 132660 132671 |
|                                                     | (132360) | AACTTTTTTGCATTGCACAAAAAATTCATTTTAAATTTATCATATCACAGGCTGCAGTTTCTGTTATCTGTCCCCAC  |        |        |        |        |        |               |
| SARS-CoV-2 NC_045512.2                              | (29904)  | -----                                                                          |        |        |        |        |        |               |
|                                                     |          | Section 1724                                                                   |        |        |        |        |        |               |
| Autographa californica nucleopolyhedrovirus NC 0... | (132672) | 132672                                                                         | 132682 | 132693 | 132704 | 132715 | 132726 | 132737 132748 |
|                                                     | (132437) | TCAGGCGTGCAGCTATAAAAGCAGGCACTCACCAACTCGTAAGCACAGTTCGTTGTGAAGTGAACACGGAGAGCCTG  |        |        |        |        |        |               |
| SARS-CoV-2 NC_045512.2                              | (29904)  | -----                                                                          |        |        |        |        |        |               |
|                                                     |          | Section 1725                                                                   |        |        |        |        |        |               |
| Autographa californica nucleopolyhedrovirus NC 0... | (132749) | 132749                                                                         | 132759 | 132770 | 132781 | 132792 | 132803 | 132814 132825 |
|                                                     | (132514) | CCAATAAGCAAAATGCCAAGGGACACCAACAATCGCCACCGGTCTACGCCATATGAACGTCTACGCTTGAAGATCT   |        |        |        |        |        |               |
| SARS-CoV-2 NC_045512.2                              | (29904)  | -----                                                                          |        |        |        |        |        |               |
|                                                     |          | Section 1726                                                                   |        |        |        |        |        |               |
| Autographa californica nucleopolyhedrovirus NC 0... | (132826) | 132826                                                                         | 132836 | 132847 | 132858 | 132869 | 132880 | 132891 132902 |
|                                                     | (132591) | CCGCAGACAGTTGCAAGACAATTTGGACAGCATAAACCGCCGAGACAGAATGCAAGAAGAACAAGAAGAAAACCTGC  |        |        |        |        |        |               |
| SARS-CoV-2 NC_045512.2                              | (29904)  | -----                                                                          |        |        |        |        |        |               |
|                                                     |          | Section 1727                                                                   |        |        |        |        |        |               |
| Autographa californica nucleopolyhedrovirus NC 0... | (132903) | 132903                                                                         | 132913 | 132924 | 132935 | 132946 | 132957 | 132968 132979 |
|                                                     | (132668) | GCTATCAAGTGCGTAGAAAGGCAGCGTCAAAACCAGCTCCGCTCCATACAAATGGAACAGCAGCGAATGATGGCGGAA |        |        |        |        |        |               |
| SARS-CoV-2 NC_045512.2                              | (29904)  | -----                                                                          |        |        |        |        |        |               |
|                                                     |          | Section 1728                                                                   |        |        |        |        |        |               |
| Autographa californica nucleopolyhedrovirus NC 0... | (132980) | 132980                                                                         | 132990 | 133001 | 133012 | 133023 | 133034 | 133045 133056 |
|                                                     | (132745) | TTAAACAACGAGCCGGTGATTAATTTTAAATTTGAGTGTAGTGTGTGTTAGAAACATATTCCCAACAATCTAACGA   |        |        |        |        |        |               |
| SARS-CoV-2 NC_045512.2                              | (29904)  | -----                                                                          |        |        |        |        |        |               |
|                                                     |          | Section 1729                                                                   |        |        |        |        |        |               |
| Autographa californica nucleopolyhedrovirus NC 0... | (133057) | 133057                                                                         | 133067 | 133078 | 133089 | 133100 | 133111 | 133122 133133 |
|                                                     | (132822) | TACTTGTCCTTTTTTGATTCCGACTACGTGCGACCACGGTTTTTGTTCAAATGCGTCATCAATCTGCAAAGCAACG   |        |        |        |        |        |               |
| SARS-CoV-2 NC_045512.2                              | (29904)  | -----                                                                          |        |        |        |        |        |               |

## SARS-CoV-2 &amp; Autographa californica nucleopolyhedrovirus.apr

|                                                     |          |                                                                                   |        |        |        |        |        |               |
|-----------------------------------------------------|----------|-----------------------------------------------------------------------------------|--------|--------|--------|--------|--------|---------------|
|                                                     |          | Section 1730                                                                      |        |        |        |        |        |               |
| Autographa californica nucleopolyhedrovirus NC 0... | (133134) | 133134                                                                            | 133144 | 133155 | 133166 | 133177 | 133188 | 133199 133210 |
|                                                     | (132899) | CGATGAATATTCCGCATTCCACTGTGTGCTGTCCATTGTGCAATACCCAGGTAAAAATGTGGCGTTCCTTAAAGCCT     |        |        |        |        |        |               |
|                                                     | (29904)  | -----                                                                             |        |        |        |        |        |               |
|                                                     |          | Section 1731                                                                      |        |        |        |        |        |               |
| Autographa californica nucleopolyhedrovirus NC 0... | (133211) | 133211                                                                            | 133221 | 133232 | 133243 | 133254 | 133265 | 133276 133287 |
|                                                     | (132976) | AACGCTGTTGTGACGTGTAAGTTTTACAAGAAACTCAAGAAAGAGTTCGCCCGTGCAGCAGTATAAAAAACATTAT      |        |        |        |        |        |               |
|                                                     | (29904)  | -----                                                                             |        |        |        |        |        |               |
|                                                     |          | Section 1732                                                                      |        |        |        |        |        |               |
| Autographa californica nucleopolyhedrovirus NC 0... | (133288) | 133288                                                                            | 133298 | 133309 | 133320 | 133331 | 133342 | 133353 133364 |
|                                                     | (133053) | TAAAGTGCTACAAGAACGGAGCGTGATTAGTGTGGAAGACAACGACAATAATTGTGACATAAATATGGAGAATCAGG     |        |        |        |        |        |               |
|                                                     | (29904)  | -----                                                                             |        |        |        |        |        |               |
|                                                     |          | Section 1733                                                                      |        |        |        |        |        |               |
| Autographa californica nucleopolyhedrovirus NC 0... | (133365) | 133365                                                                            | 133375 | 133386 | 133397 | 133408 | 133419 | 133430 133441 |
|                                                     | (133130) | CAAAGATAGCTGCTTTGGAAGCTGAATTGGAAGAAGAAAAAATCACAGTGATCAAGTAGCTTCTGAAAACCGACAG      |        |        |        |        |        |               |
|                                                     | (29904)  | -----                                                                             |        |        |        |        |        |               |
|                                                     |          | Section 1734                                                                      |        |        |        |        |        |               |
| Autographa californica nucleopolyhedrovirus NC 0... | (133442) | 133442                                                                            | 133452 | 133463 | 133474 | 133485 | 133496 | 133507 133518 |
|                                                     | (133207) | CTGATAGAAGAAAATACTCGTCTCAATGAACAGATTCAAGAGTTGCAGCATCAGGTGAGGACATTGGTGCCGCAACG     |        |        |        |        |        |               |
|                                                     | (29904)  | -----                                                                             |        |        |        |        |        |               |
|                                                     |          | Section 1735                                                                      |        |        |        |        |        |               |
| Autographa californica nucleopolyhedrovirus NC 0... | (133519) | 133519                                                                            | 133529 | 133540 | 133551 | 133562 | 133573 | 133584 133595 |
|                                                     | (133284) | TGGCATTACGGTTAATCAGCAAATTGGCCGTGACGACAGTGCGCCAGCCGAGCTGAACGAGCGTTTTTCGCTCACTTG    |        |        |        |        |        |               |
|                                                     | (29904)  | -----                                                                             |        |        |        |        |        |               |
|                                                     |          | Section 1736                                                                      |        |        |        |        |        |               |
| Autographa californica nucleopolyhedrovirus NC 0... | (133596) | 133596                                                                            | 133606 | 133617 | 133628 | 133639 | 133650 | 133661 133672 |
|                                                     | (133361) | TCTATTTCGACTATTTTCAGAGCTGTTTATTGAAAAATGGCGTTTCATAGTATTCAAAATTATGTTTATGCCGGAACCTCT |        |        |        |        |        |               |
|                                                     | (29904)  | -----                                                                             |        |        |        |        |        |               |



## SARS-CoV-2 &amp; Autographa californica nucleopolyhedrovirus.apr

|                                                     |          |                                                                                 |        |        |        |        |        |               |
|-----------------------------------------------------|----------|---------------------------------------------------------------------------------|--------|--------|--------|--------|--------|---------------|
|                                                     |          | Section 1737                                                                    |        |        |        |        |        |               |
| Autographa californica nucleopolyhedrovirus NC 0... | (133673) | 133673                                                                          | 133683 | 133694 | 133705 | 133716 | 133727 | 133738 133749 |
|                                                     | (133438) | GCTGCTAGTTCATGTGATGTAAATGTTACTGTTAATTTTGGGTTTGAAAATTAATGTGATATGAAATGTATATATAA   |        |        |        |        |        |               |
| SARS-CoV-2 NC_045512.2                              | (29904)  | -----                                                                           |        |        |        |        |        |               |
|                                                     |          | Section 1738                                                                    |        |        |        |        |        |               |
| Autographa californica nucleopolyhedrovirus NC 0... | (133750) | 133750                                                                          | 133760 | 133771 | 133782 | 133793 | 133804 | 133815 133826 |
|                                                     | (133515) | AAATGATGGAATAAATAATAAACATTTTTATACCTTTTTATGTTTTTTTTATTTTCATGTGATTAAGAAACTTTTAAGA |        |        |        |        |        |               |
| SARS-CoV-2 NC_045512.2                              | (29904)  | -----                                                                           |        |        |        |        |        |               |
|                                                     |          | Section 1739                                                                    |        |        |        |        |        |               |
| Autographa californica nucleopolyhedrovirus NC 0... | (133827) | 133827                                                                          | 133837 | 133848 | 133859 | 133870 | 133881 | 133892 133903 |
|                                                     | (133592) | TGGATAGTAGTAATTGTATTAAAAATAGATGTAAATACGATATGCCGTTACATTATCAATGTGACAATAACGCAGAT   |        |        |        |        |        |               |
| SARS-CoV-2 NC_045512.2                              | (29904)  | -----                                                                           |        |        |        |        |        |               |
|                                                     |          | Section 1740                                                                    |        |        |        |        |        |               |
| Autographa californica nucleopolyhedrovirus NC 0... | (133904) | 133904                                                                          | 133914 | 133925 | 133936 | 133947 | 133958 | 133969 133980 |
|                                                     | (133669) | AAAGACGTTGTAAATGCGTATGACACTATCGATGTTGACCCCAACAAAAGATTTATAATTAATCATAATCACGAACA   |        |        |        |        |        |               |
| SARS-CoV-2 NC_045512.2                              | (29904)  | -----                                                                           |        |        |        |        |        |               |
|                                                     |          | Section 1741                                                                    |        |        |        |        |        |               |
| Autographa californica nucleopolyhedrovirus NC 0... | (133981) | 133981                                                                          | 133991 | 134002 | 134013 | 134024 | 134035 | 134046 134057 |
|                                                     | (133746) | ACAACAAGTCAATGAAACAAATAAACAAAGTTGTCGATAAACATTTCATAAATGACACAGCAACATACAAATTCTTGCA |        |        |        |        |        |               |
| SARS-CoV-2 NC_045512.2                              | (29904)  | -----                                                                           |        |        |        |        |        |               |
|                                                     |          | Section 1742                                                                    |        |        |        |        |        |               |
| Autographa californica nucleopolyhedrovirus NC 0... | (134058) | 134058                                                                          | 134068 | 134079 | 134090 | 134101 | 134112 | 134129        |
|                                                     | (133823) | TAATAAAAAATTTAAATGACATCATATTTGAGAATAACAAATGACATTATCCCTCGATTGTGTTTTACAAGTA       |        |        |        |        |        |               |
| SARS-CoV-2 NC_045512.2                              | (29904)  | -----                                                                           |        |        |        |        |        |               |
