# Supplementary figures and images for: Ubiquitous Micro-Modular Homologies among Genomes from Viruses to Bacteria to Human Mitochondrial DNA: Platforms for Recombination during Evolution?
Source: MDPI journal article supplement (doi:10.3390/v14050885), 2022-04-24

**E. Coli 1–200,00nt**

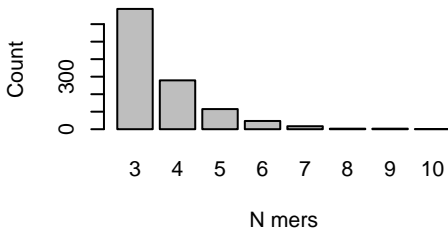

**E. Coli 200,001–400,00nt**

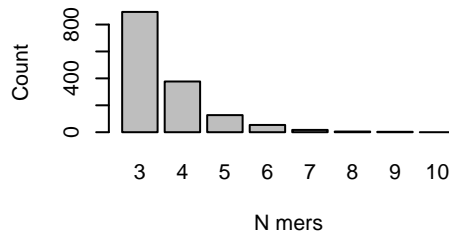

**E. Coli 400,001–600,00nt**

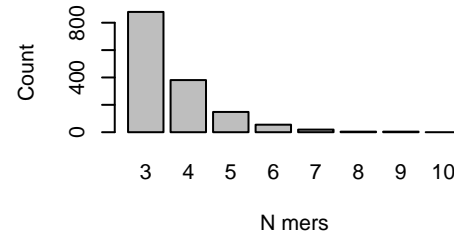

**E. Coli 600,001–800,00nt**

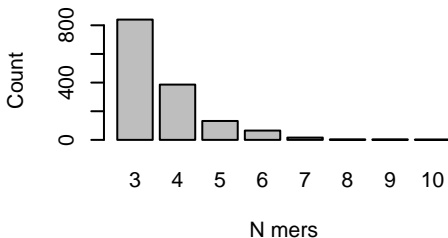

**E. Coli 800,001–1,000,000nt**

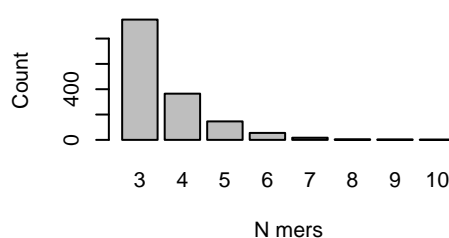

**E. Coli 1,000,001–1,200,000nt**

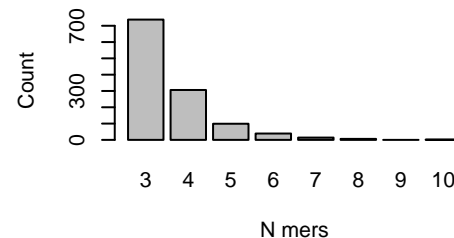

**E. Coli 1,200,001–1,400,000nt**

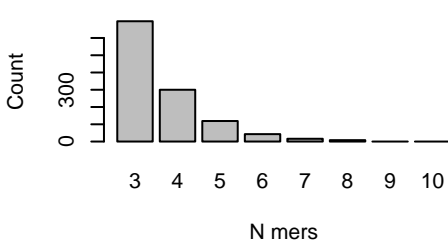

**E. Coli 1,400,001–1,600,000nt**

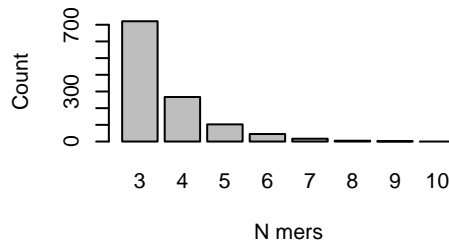

**E. Coli 1,600,001–1,800,000nt**

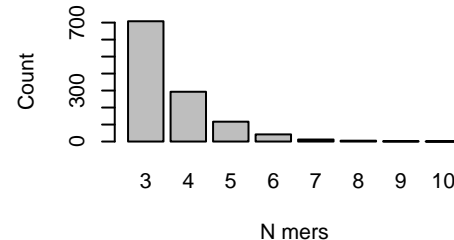

Supplement: s1 [file s1]

**E. Coli 3,600,001–3,800,000nt**

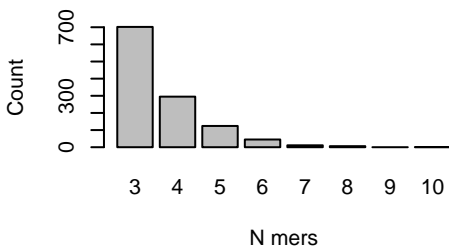

**E. Coli 3,800,001–4,000,000nt**

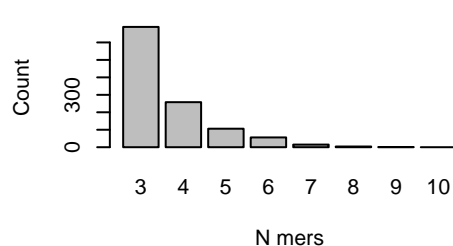

**E. Coli 4,000,001–4,200,000nt**

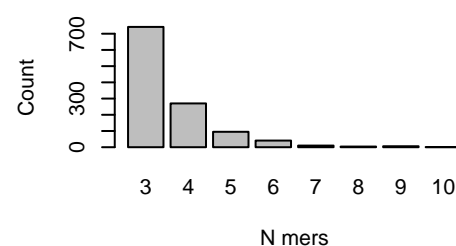

**E. Coli 4,200,001–4,400,000nt**

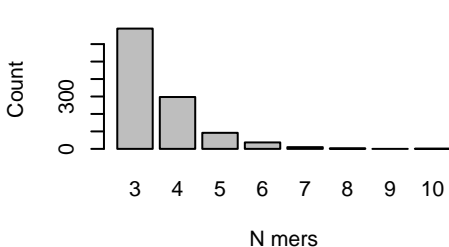

**E. Coli 4,400,001–4,600,000nt**

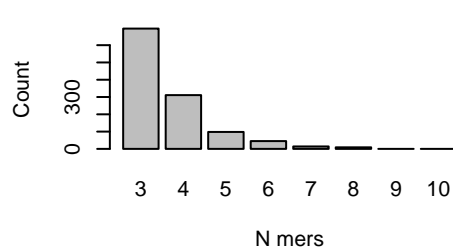

**E. Coli 4,600,000–4,641,652nt**

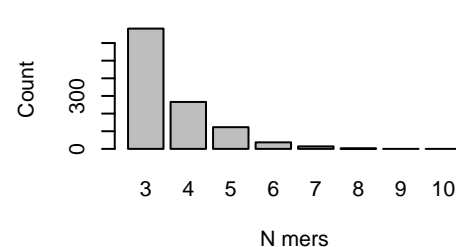

Supplement: s1 [file s1]
